# Supplementary material for: Genome resequencing and transcriptome analysis reveal the molecular mechanism of albinism in Cordyceps militaris
Source: Front Microbiol. 2023 Apr 11;14:1153153. doi: 10.3389/fmicb.2023.1153153 (PMC10126257; doi:10.3389/fmicb.2023.1153153)
Supplement: Supplementary file 7 [file Table_7.XLSX]

## Sheet: Sheet1
Table S7. Differentially expressed genes in the Alb compared with WT. WT, wild type before light treatment; Alb, albino mutation before light treatment.
Gene ID	BaseMean		log2FoldChange	pval	padj	Chromosome	GO	KEGG	eggNOG	eggNOG_Class	Swissprot	NR	Entrez_geneID	BP	CC	MF	Pathway
	WT	Alb
CCM_09196	4333.5	2.12522	-10.9937	1.07457e-119	1.03127e-115	NW_006271976.1	-	-	opiNOG43873;sordNOG14513	S	-	hypothetical protein	18171199	-	-	-	-
CCM_00793	8496.71	564.209	-3.9126	1.8232e-36	8.74862e-33	NW_006271969.1	-	-	arthNOG12677	R	-	hypothetical protein	18162827	-	-	-	-
CCM_09195	135.963	0.324739	-8.70972	2.10228e-22	5.04389e-19	NW_006271976.1	-	-	-	-	-	hypothetical protein	18171198	-	-	-	-
CCM_02867	332.218	31.0481	-3.41955	5.41313e-18	8.6583e-15	NW_006271970.1	GO:0005975;GO:0004553	-	COG2273;opiNOG49246;sordNOG08781	RG	sp|P23903|E13B_BACCI Glucan endo-1,3-beta-glucosidase A1 OS=Bacillus circulans GN=glcA PE=1 SV=1	secreted glucosidase	18164894	GO:0005975//carbohydrate metabolic process;	-	GO:0004553//hydrolase activity, hydrolyzing O-glycosyl compounds;	-
CCM_08671	3422.9	738.308	-2.21292	1.51694e-15	2.07973e-12	NW_006271975.1	-	-	-	-	-	hypothetical protein	18170677	-	-	-	-
CCM_09194	563.618	0.324739	-10.7612	5.00706e-15	5.3392e-12	NW_006271976.1	GO:0003676	-	necNOG13927;pleNOG01151	S	-	hypothetical protein	18171197	-	-	GO:0003676//nucleic acid binding;	-
CCM_09497	2153.21	475.508	-2.17894	9.41509e-15	9.03566e-12	NW_006271977.1	-	-	eurotNOG08598	S	-	hypothetical protein	18171499	-	-	-	-
CCM_09499	4308.21	614.809	-2.80888	1.33108e-13	1.06453e-10	NW_006271977.1	-	-	opiNOG59530;opiNOG46223	S	-	hypothetical protein	18171501	-	-	-	-
CCM_00340	631.787	150.511	-2.06957	1.97626e-11	1.26441e-08	NW_006271969.1	GO:0005737;GO:0006629;GO:0055114;GO:0016021;GO:0016627	-	sordNOG09295;opiNOG04155	SR	-	membrane protein, putative	18162375	GO:0006629//lipid metabolic process;GO:0055114//obsolete oxidation-reduction process;	GO:0005737//cytoplasm;GO:0016021//integral component of membrane;	GO:0016627//oxidoreductase activity, acting on the CH-CH group of donors;	-
CCM_06923	129.847	15.1435	-3.10005	3.72055e-11	2.23163e-08	NW_006271973.1	GO:0046872;GO:0016491;GO:0055114	-	sordNOG07078;pleNOG07256;opiNOG23784	SQ	sp|D7PHZ1|VRTI_PENAE Oxidoreductase vrtI OS=Penicillium aethiopicum GN=vrtI PE=1 SV=1	2OG-Fe(II) oxygenase family oxidoreductase, putative	18168934	GO:0055114//obsolete oxidation-reduction process;	-	GO:0046872//metal ion binding;GO:0016491//oxidoreductase activity;	-
CCM_09500	16481.5	2605.68	-2.66112	7.09626e-10	4.00605e-07	NW_006271977.1	-	-	opiNOG52116;sordNOG07514	S	-	hypothetical protein	18171502	-	-	-	-
CCM_01559	1605.44	486.757	-1.7217	6.97419e-09	3.18721e-06	NW_006271969.1	GO:0006817;GO:0005315;GO:0016021;GO:0055085	K14640	opiNOG02222	P	sp|P15710|PHO4_NEUCR Phosphate-repressible phosphate permease pho-4 OS=Neurospora crassa (strain ATCC 24698 / 74-OR23-1A / CBS 708.71 / DSM 1257 / FGSC 987) GN=pho-4 PE=1 SV=1	sodium/phosphate symporter, putative	18163590	GO:0006817//phosphate ion transport;GO:0055085//transmembrane transport;	GO:0016021//integral component of membrane;	GO:0005315//inorganic phosphate transmembrane transporter activity;	-
CCM_03083	1455.9	446.079	-1.70654	1.64812e-08	6.87695e-06	NW_006271970.1	GO:0050660;GO:0055114;GO:0003885;GO:0016020	-	opiNOG23046;sordNOG07494	S	-	putative oxidoreductase	18165110	GO:0055114//obsolete oxidation-reduction process;	GO:0016020//membrane;	GO:0050660//flavin adenine dinucleotide binding;GO:0003885//D-arabinono-1,4-lactone oxidase activity;	-
CCM_06856	319.343	61.4778	-2.37697	3.51068e-08	1.34768e-05	NW_006271973.1	GO:0016021	-	opiNOG36907;sorNOG08422;sordNOG12981;sordNOG13614	S	-	hypothetical protein	18168867	-	GO:0016021//integral component of membrane;	-	-
CCM_01829	1127.87	380.176	-1.56886	6.19233e-08	2.20103e-05	NW_006271969.1	GO:0016021;GO:0005524;GO:0016887	-	sordNOG07645	Q	sp|Q9MAG3|AB24G_ARATH ABC transporter G family member 24 OS=Arabidopsis thaliana GN=ABCG24 PE=2 SV=2	ABC transporter, putative	18163859	-	GO:0016021//integral component of membrane;	GO:0005524//ATP binding;GO:0016887//ATP hydrolysis activity;	-
CCM_09183	1272.4	439.454	-1.53377	8.01505e-08	2.74716e-05	NW_006271976.1	GO:0005975;GO:0004553	K01179	sordNOG11839;opiNOG09764	RG	sp|A0A024SH20|GUN2_HYPJR Endoglucanase EG-II OS=Hypocrea jecorina (strain ATCC 56765 / BCRC 32924 / NRRL 11460 / Rut C-30) GN=egl2 PE=1 SV=1	glycoside hydrolase family GH5	18171186	GO:0005975//carbohydrate metabolic process;	-	GO:0004553//hydrolase activity, hydrolyzing O-glycosyl compounds;	ko02020(Two-component system);ko00500(Starch and sucrose metabolism)
CCM_09496	6544.11	1095.86	-2.57814	9.41195e-08	3.1147e-05	NW_006271977.1	-	-	-	-	-	hypothetical protein	18171498	-	-	-	-
CCM_06855	572.416	94.888	-2.59277	1.17849e-07	3.76999e-05	NW_006271973.1	GO:0016021	-	opiNOG36907;opiNOG26592;opiNOG48972	S	sp|A0A0U1LQF6|CCTO_TALIS Cyclochlorotine biosynthesis protein O OS=Talaromyces islandicus GN=cctO PE=3 SV=1	hypothetical protein	18168866	-	GO:0016021//integral component of membrane;	-	-
CCM_01149	2995.42	655.375	-2.19236	3.85244e-07	0.000112036	NW_006271969.1	GO:0055085;GO:0005215;GO:0016021	-	opiNOG06725;sordNOG08730	S	sp|C8V329|FCY2_EMENI Purine-cytosine permease fcyB OS=Emericella nidulans (strain FGSC A4 / ATCC 38163 / CBS 112.46 / NRRL 194 / M139) GN=fcyB PE=1 SV=1	purine-cytosine permease FCY21	18163181	GO:0055085//transmembrane transport;	GO:0016021//integral component of membrane;	GO:0005215//transporter activity;	-
CCM_08968	4250.58	1146.26	-1.89072	4.19258e-07	0.000114961	NW_006271975.1	GO:0016021	-	opiNOG43732;opiNOG58892;pleNOG06342;NOG155141;sordNOG13906	S	-	hypothetical protein	18170972	-	GO:0016021//integral component of membrane;	-	-
CCM_09335	39589.5	8889.96	-2.15487	6.58041e-07	0.000170682	NW_006271976.1	-	-	NOG200556	S	-	hypothetical protein	18171338	-	-	-	-
CCM_01075	1797.6	273.086	-2.71865	9.463e-07	0.00023899	NW_006271969.1	-	-	-	-	-	hypothetical protein	18163108	-	-	-	-
CCM_02883	3988.98	1605.64	-1.31287	1.33106e-06	0.000315639	NW_006271970.1	GO:0004565;GO:0009341;GO:0030246;GO:0005975	K01190	sordNOG10522;opiNOG15402	G	sp|P00723|BGAL_KLULA Beta-galactosidase OS=Kluyveromyces lactis (strain ATCC 8585 / CBS 2359 / DSM 70799 / NBRC 1267 / NRRL Y-1140 / WM37) GN=LAC4 PE=1 SV=2	beta-galactosidase	18164910	GO:0005975//carbohydrate metabolic process;	GO:0009341//beta-galactosidase complex;	GO:0004565//beta-galactosidase activity;GO:0030246//carbohydrate binding;	ko00600(Sphingolipid metabolism);ko00511(Other glycan degradation);ko00052(Galactose metabolism)
CCM_01143	1490.25	585.23	-1.34848	1.34846e-06	0.000315639	NW_006271969.1	GO:0016021	-	opiNOG05746;sordNOG10247	I	sp|Q9UUA6|DPP1_SCHPO Probable diacylglycerol pyrophosphate phosphatase 1 OS=Schizosaccharomyces pombe (strain 972 / ATCC 24843) GN=dpp1 PE=3 SV=1	PAP2 domain containing protein	18163175	-	GO:0016021//integral component of membrane;	-	-
CCM_01456	420.953	138.156	-1.60737	2.46794e-06	0.000550811	NW_006271969.1	GO:0005759;GO:0016740;GO:0016226	K22073	sordNOG06906;opiNOG06342	KE	sp|A4R8F9|CAF17_MAGO7 Putative transferase CAF17, mitochondrial OS=Magnaporthe oryzae (strain 70-15 / ATCC MYA-4617 / FGSC 8958) GN=CAF17 PE=3 SV=1	aminomethyl transferase	18163487	GO:0016226//iron-sulfur cluster assembly;	GO:0005759//mitochondrial matrix;	GO:0016740//transferase activity;	-
CCM_02829	208.516	62.1866	-1.74548	2.70697e-06	0.000590427	NW_006271970.1	-	-	opiNOG03177;sordNOG08795	S	sp|P53933|APP1_YEAST Phosphatidate phosphatase APP1 OS=Saccharomyces cerevisiae (strain ATCC 204508 / S288c) GN=APP1 PE=1 SV=1	hypothetical protein	18164856	-	-	-	-
CCM_09176	295.513	100.516	-1.5558	3.05615e-06	0.000651776	NW_006271976.1	-	-	sordNOG13988;opiNOG41449	R	-	hypothetical protein	18171179	-	-	-	-
CCM_07082	154.352	43.2471	-1.83554	3.21372e-06	0.00067048	NW_006271973.1	GO:0005759;GO:0051087;GO:0006457;GO:0006986;GO:0050821;GO:0008270;GO:0030150	K17808	sordNOG13685;opiNOG41804	S	sp|Q09759|YA72_SCHPO Uncharacterized protein C24H6.02c OS=Schizosaccharomyces pombe (strain 972 / ATCC 24843) GN=SPAC24H6.02c PE=4 SV=1	DNL zinc finger domain containing protein	18169093	GO:0006457//protein folding;GO:0006986//response to unfolded protein;GO:0050821//protein stabilization;GO:0030150//protein import into mitochondrial matrix;	GO:0005759//mitochondrial matrix;	GO:0051087//chaperone binding;GO:0008270//zinc ion binding;	-
CCM_09231	1287.92	522.377	-1.30188	3.41943e-06	0.000698219	NW_006271976.1	GO:0016042;GO:0004806	-	opiNOG54429;opiNOG35196	R	-	hypothetical protein	18171234	GO:0016042//lipid catabolic process;	-	GO:0004806//triglyceride lipase activity;	-
CCM_09165	272.19	93.4129	-1.54292	4.82897e-06	0.00090115	NW_006271976.1	GO:0006888;GO:0005737	K20301	sordNOG07250	S	sp|Q54CU7|TPC2L_DICDI Trafficking protein particle complex subunit 2-like protein OS=Dictyostelium discoideum GN=trappc2l PE=3 SV=1	Longin-like protein	18171168	GO:0006888//endoplasmic reticulum to Golgi vesicle-mediated transport;	GO:0005737//cytoplasm;	-	-
CCM_00711	123.257	32.5751	-1.91983	4.88276e-06	0.00090115	NW_006271969.1	GO:0032153;GO:0051286;GO:0016021	K21989	sordNOG11571	S	sp|O43022|YGV8_SCHPO Uncharacterized protein C354.08c OS=Schizosaccharomyces pombe (strain 972 / ATCC 24843) GN=SPBC354.08c PE=3 SV=1	DUF221 domain protein, putative	18162745	-	GO:0032153//cell division site;GO:0051286//cell tip;GO:0016021//integral component of membrane;	-	-
CCM_09383	2385.12	860.782	-1.47034	6.46967e-06	0.0011289	NW_006271977.1	GO:0008531;GO:0009231;GO:0016310	K00861	opiNOG34930;sordNOG11645	H	sp|A4QQ05|RIFK_MAGO7 Riboflavin kinase OS=Magnaporthe oryzae (strain 70-15 / ATCC MYA-4617 / FGSC 8958) GN=FMN1 PE=3 SV=3	Riboflavin kinase	18171386	GO:0009231//riboflavin biosynthetic process;GO:0016310//phosphorylation;	-	GO:0008531//riboflavin kinase activity;	ko00740(Riboflavin metabolism)
CCM_07513	160.561	33.3526	-2.26725	7.03481e-06	0.00120559	NW_006271974.1	-	-	COG2828;opiNOG21857	S	sp|Q0QLE6|MII_EUBBA 3-methylitaconate isomerase OS=Eubacterium barkeri GN=mii PE=1 SV=1	DUF453 domain protein	18169524	-	-	-	-
CCM_05879	407.853	153.004	-1.41448	8.3467e-06	0.00135768	NW_006271972.1	-	K17362	sordNOG14231	S	sp|Q9NPJ3|ACO13_HUMAN Acyl-coenzyme A thioesterase 13 OS=Homo sapiens GN=ACOT13 PE=1 SV=1	Thioesterase superfamily	18167897	-	-	-	-
CCM_02265	597.68	223.131	-1.42148	8.71477e-06	0.00139393	NW_006271970.1	GO:0016021	K22736	opiNOG60016;sordNOG13880	S	sp|P47818|CCC1_YEAST Protein CCC1 OS=Saccharomyces cerevisiae (strain ATCC 204508 / S288c) GN=CCC1 PE=1 SV=1	hypothetical protein	18164292	-	GO:0016021//integral component of membrane;	-	-
CCM_06216	1406.26	251.826	-2.48136	1.05224e-05	0.00165547	NW_006271972.1	-	-	-	-	-	hypothetical protein	18168231	-	-	-	-
CCM_05768	113.909	30.6327	-1.89474	1.33107e-05	0.0019914	NW_006271972.1	-	-	NOG27429;sordNOG09564;opiNOG24098	RS	sp|P22222|E13B_CELCE Glucan endo-1,3-beta-glucosidase OS=Cellulosimicrobium cellulans PE=1 SV=1	glucan endo-1,3-beta-glucosidase precursor, putative	18167786	-	-	-	-
CCM_02510	198.172	67.5339	-1.55307	1.62052e-05	0.00232121	NW_006271970.1	-	K05302	sordNOG15519;opiNOG17905	S	sp|Q12504|RKM4_YEAST Ribosomal lysine N-methyltransferase 4 OS=Saccharomyces cerevisiae (strain ATCC 204508 / S288c) GN=RKM4 PE=1 SV=1	SET domain-containing protein RMS1	18164537	-	-	-	-
CCM_06987	990.971	401.366	-1.30392	2.17497e-05	0.00302511	NW_006271973.1	GO:0016614;GO:0050660;GO:0055114	-	opiNOG16284;opiNOG24385;sordNOG10995;opiNOG22340	R	sp|G3Y424|YANF_ASPNA FAD-dependent monooxygenase yanF OS=Aspergillus niger (strain ATCC 1015 / CBS 113.46 / FGSC A1144 / LSHB Ac4 / NCTC 3858a / NRRL 328 / USDA 3528.7) GN=yanF PE=1 SV=1	FAD binding domain protein	18168998	GO:0055114//obsolete oxidation-reduction process;	-	GO:0016614//oxidoreductase activity, acting on CH-OH group of donors;GO:0050660//flavin adenine dinucleotide binding;	-
CCM_03849	118.286	29.1384	-2.02128	2.27829e-05	0.00308669	NW_006271971.1	GO:0016021	-	sordNOG04481	S	-	hypothetical protein	18165872	-	GO:0016021//integral component of membrane;	-	-
CCM_01130	754.184	317.771	-1.24693	2.28358e-05	0.00308669	NW_006271969.1	GO:0009086;GO:0005737;GO:0004414	-	opiNOG03428;sordNOG07056	IE	sp|Q5AT15|SST_EMENI Serine O-succinyltransferase OS=Emericella nidulans (strain FGSC A4 / ATCC 38163 / CBS 112.46 / NRRL 194 / M139) GN=cysA PE=1 SV=1	homoserine O-acetyltransferase	18163162	GO:0009086//methionine biosynthetic process;	GO:0005737//cytoplasm;	GO:0004414//homoserine O-acetyltransferase activity;	-
CCM_04196	708.171	284.506	-1.31564	2.47095e-05	0.00320518	NW_006271971.1	GO:0005743;GO:0055085;GO:0016021;GO:0006631;GO:0005476	K15109	opiNOG03838;sordNOG04878	C	sp|Q12289|CRC1_YEAST Mitochondrial carnitine carrier OS=Saccharomyces cerevisiae (strain ATCC 204508 / S288c) GN=CRC1 PE=1 SV=1	carnitine/acylcarnitine carrier protein	18166219	GO:0055085//transmembrane transport;GO:0006631//fatty acid metabolic process;	GO:0005743//mitochondrial inner membrane;GO:0016021//integral component of membrane;	GO:0005476//carnitine:acyl carnitine antiporter activity;	ko04714(Thermogenesis)
CCM_01070	341.582	133.383	-1.35666	2.47143e-05	0.00320518	NW_006271969.1	-	-	opiNOG60562;opiNOG59471	S	-	hypothetical protein	18163103	-	-	-	-
CCM_04978	3090.38	345.519	-3.16095	2.75573e-05	0.00352623	NW_006271971.1	-	-	opiNOG61747;sordNOG14699	S	-	hypothetical protein	18166998	-	-	-	-
CCM_05709	176.999	16.6719	-3.40825	2.80625e-05	0.00354363	NW_006271972.1	GO:0016021;GO:0016052;GO:0008496	K08257	hypNOG03770;sordNOG04720;opiNOG19415	RS	sp|P36091|DCW1_YEAST Mannan endo-1,6-alpha-mannosidase DCW1 OS=Saccharomyces cerevisiae (strain ATCC 204508 / S288c) GN=DCW1 PE=1 SV=1	Mannan endo-1,6-alpha-mannosidase	18167727	GO:0016052//carbohydrate catabolic process;	GO:0016021//integral component of membrane;	GO:0008496//mannan endo-1,6-alpha-mannosidase activity;	-
CCM_09331	5867.16	2378.81	-1.30242	3.12413e-05	0.00379523	NW_006271976.1	-	-	eurotNOG08598	S	-	hypothetical protein	18171334	-	-	-	-
CCM_07167	1091.53	484.321	-1.17231	3.21304e-05	0.00385444	NW_006271973.1	-	-	-	-	-	hypothetical protein	18169178	-	-	-	-
CCM_09498	28455.3	5969.35	-2.25305	3.65285e-05	0.00427517	NW_006271977.1	GO:0016021;GO:0097264	-	COG3209;opiNOG12837	MS	-	RHS Repeat protein	18171500	GO:0097264//self proteolysis;	GO:0016021//integral component of membrane;	-	-
CCM_09432	933.642	394.595	-1.2425	4.14502e-05	0.00467997	NW_006271977.1	GO:0005829;GO:0005634;GO:0019628;GO:0006144;GO:0004846;GO:0005777;GO:0055114	K00365	sordNOG11566;opiNOG13481	Q	sp|P33282|URIC_EMENI Uricase OS=Emericella nidulans (strain FGSC A4 / ATCC 38163 / CBS 112.46 / NRRL 194 / M139) GN=uaZ PE=3 SV=1	uricase	18171435	GO:0019628//urate catabolic process;GO:0006144//purine nucleobase metabolic process;GO:0055114//obsolete oxidation-reduction process;	GO:0005829//cytosol;GO:0005634//nucleus;GO:0005777//peroxisome;	GO:0004846//urate oxidase activity;	ko00232(Caffeine metabolism);ko00230(Purine metabolism)
CCM_02996	683.39	200.492	-1.76916	4.24053e-05	0.00473214	NW_006271970.1	GO:0006147;GO:0005829;GO:0008270;GO:0008892	K01487	opiNOG00968;sordNOG11811	F	sp|O14057|GUAD_SCHPO Probable guanine deaminase OS=Schizosaccharomyces pombe (strain 972 / ATCC 24843) GN=SPCC1672.03c PE=3 SV=1	guanine deaminase	18165023	GO:0006147//guanine catabolic process;	GO:0005829//cytosol;	GO:0008270//zinc ion binding;GO:0008892//guanine deaminase activity;	ko00230(Purine metabolism)
CCM_01141	352.152	142.228	-1.30799	4.69409e-05	0.00511922	NW_006271969.1	GO:0009435;GO:0000309;GO:0005524	K06210	opiNOG17277;COG1057;sorNOG03390	H	sp|P53204|NMA2_YEAST Nicotinamide/nicotinic acid mononucleotide adenylyltransferase 2 OS=Saccharomyces cerevisiae (strain ATCC 204508 / S288c) GN=NMA2 PE=1 SV=1	nicotinamide-nucleotide adenylyltransferase 2	18163173	GO:0009435//NAD biosynthetic process;	-	GO:0000309//nicotinamide-nucleotide adenylyltransferase activity;GO:0005524//ATP binding;	ko00760(Nicotinate and nicotinamide metabolism)
CCM_08714	862.131	283.807	-1.603	5.0162e-05	0.00540904	NW_006271975.1	GO:0016810	-	opiNOG34865;COG1574;sordNOG10129	SR	sp|O34355|YTCJ_BACSU Putative amidohydrolase YtcJ OS=Bacillus subtilis (strain 168) GN=ytcJ PE=3 SV=1	amidohydrolase family protein	18170720	-	-	GO:0016810//hydrolase activity, acting on carbon-nitrogen (but not peptide) bonds;	-
CCM_04220	4447.16	2127	-1.06407	5.22132e-05	0.00556767	NW_006271971.1	GO:0016021	-	opiNOG57336;sordNOG08554;opiNOG24886	R	-	hypothetical protein	18166243	-	GO:0016021//integral component of membrane;	-	-
CCM_01999	1075.98	485.91	-1.14689	5.29693e-05	0.00558623	NW_006271970.1	GO:0016874;GO:0008152	K01908	opiNOG00481;COG0365;sordNOG08981	I	sp|P28812|Y3568_PSEAE Uncharacterized protein PA3568 OS=Pseudomonas aeruginosa (strain ATCC 15692 / DSM 22644 / CIP 104116 / JCM 14847 / LMG 12228 / 1C / PRS 101 / PAO1) GN=PA3568 PE=3 SV=2	acetate-CoA ligase	18164028	GO:0008152//metabolic process;	-	GO:0016874//ligase activity;	ko00640(Propanoate metabolism)
CCM_07001	121.557	25.0111	-2.28099	6.44132e-05	0.00671927	NW_006271973.1	GO:0008080	-	COG0454;opiNOG42123	RK	-	GNAT family N-acetyltransferase, putative	18169012	-	-	GO:0008080//N-acetyltransferase activity;	-
CCM_06857	53.0846	9.94311	-2.41653	6.56952e-05	0.00677932	NW_006271973.1	GO:0016021	-	sordNOG15776;opiNOG37860	S	-	hypothetical protein	18168868	-	GO:0016021//integral component of membrane;	-	-
CCM_09333	12057.3	5789.04	-1.05851	7.36938e-05	0.00729113	NW_006271976.1	GO:0006355;GO:0043565;GO:0003700;GO:0016787	-	opiNOG56491;eurotNOG06078;eurotNOG06429	S	-	hypothetical protein	18171336	GO:0006355//regulation of transcription, DNA-templated;	-	GO:0043565//sequence-specific DNA binding;GO:0003700//DNA-binding transcription factor activity;GO:0016787//hydrolase activity;	-
CCM_09423	105.255	30.495	-1.78724	8.00944e-05	0.00784353	NW_006271977.1	-	-	sordNOG13776;sorNOG05942	S	-	hypothetical protein	18171426	-	-	-	-
CCM_01840	1379.86	652.631	-1.08019	8.15952e-05	0.00790979	NW_006271969.1	-	-	sordNOG08115	R	sp|P9WHR2|CAEA_MYCTO Carboxylesterase A OS=Mycobacterium tuberculosis (strain CDC 1551 / Oshkosh) GN=caeA PE=3 SV=1	proteinase, putative	18163869	-	-	-	-
CCM_09336	46612.9	11007.2	-2.08228	8.34413e-05	0.00800786	NW_006271976.1	-	-	sordNOG13623;opiNOG53021;opiNOG49324;eurotNOG06685	S	-	Membrane attack complex component/perforin	18171339	-	-	-	-
CCM_06273	99.1226	16.4751	-2.58893	8.9926e-05	0.00854475	NW_006271972.1	GO:0016021	-	sorNOG02517;sordNOG09005	S	-	DUF1275 domain protein	18168288	-	GO:0016021//integral component of membrane;	-	-
CCM_05684	862.106	363.732	-1.24499	9.36336e-05	0.00880982	NW_006271972.1	GO:0003899;GO:0006359	K03024	sordNOG13921;NOG74705	FK	-	DNA-directed RNA polymerase, III, C31 subunit, fungi	18167702	GO:0006359//regulation of transcription by RNA polymerase III;	-	GO:0003899//DNA-directed 5'-3' RNA polymerase activity;	ko04623(Cytosolic DNA-sensing pathway);ko03020(RNA polymerase)
CCM_09682	196.058	74.8101	-1.38997	0.000118158	0.0105978	NW_006271972.1	GO:0070635;GO:0034356;GO:0006218;GO:0070636;GO:0019358;GO:0008655;GO:0006216;GO:0045437;GO:0030433	K01240	sordNOG09039	F	sp|Q04179|URH1_YEAST Uridine nucleosidase OS=Saccharomyces cerevisiae (strain ATCC 204508 / S288c) GN=URH1 PE=1 SV=2	Adenosine nucleosidase	18171684	GO:0034356//NAD biosynthesis via nicotinamide riboside salvage pathway;GO:0006218//uridine catabolic process;GO:0019358//nicotinate nucleotide salvage;GO:0008655//pyrimidine-containing compound salvage;GO:0006216//cytidine catabolic process;GO:0030433//ubiquitin-dependent ERAD pathway;	-	GO:0070635//nicotinamide riboside hydrolase activity;GO:0070636//nicotinic acid riboside hydrolase activity;GO:0045437//uridine nucleosidase activity;	ko00760(Nicotinate and nicotinamide metabolism);ko00240(Pyrimidine metabolism)
CCM_04411	549.903	240.846	-1.19106	0.00012625	0.0112187	NW_006271971.1	GO:0016614;GO:0050660;GO:0055114	-	sordNOG09786;COG0277;opiNOG18276	RC	sp|A1CFM2|PATO_ASPCL FAD-linked oxidoreductase patO OS=Aspergillus clavatus (strain ATCC 1007 / CBS 513.65 / DSM 816 / NCTC 3887 / NRRL 1) GN=patO PE=1 SV=1	isoamyl alcohol oxidase, putative	18166434	GO:0055114//obsolete oxidation-reduction process;	-	GO:0016614//oxidoreductase activity, acting on CH-OH group of donors;GO:0050660//flavin adenine dinucleotide binding;	-
CCM_02723	81.0882	22.8391	-1.82799	0.000128813	0.0112383	NW_006271970.1	GO:0016021;GO:0055085;GO:0005215	-	necNOG12699;sordNOG04251	R	sp|G3XMC9|AZAK_ASPNA Efflux pump azaK OS=Aspergillus niger (strain ATCC 1015 / CBS 113.46 / FGSC A1144 / LSHB Ac4 / NCTC 3858a / NRRL 328 / USDA 3528.7) GN=azaK PE=2 SV=1	Major facilitator superfamily transporter	18164750	GO:0055085//transmembrane transport;	GO:0016021//integral component of membrane;	GO:0005215//transporter activity;	-
CCM_03238	2468.87	1196.01	-1.04562	0.000137616	0.0118982	NW_006271970.1	-	-	sorNOG05022;sordNOG13154;opiNOG38897	S	sp|Q9MBH1|AIG2C_ARATH Protein AIG2 C OS=Arabidopsis thaliana GN=AIG2C PE=1 SV=1	disease resistance protein Aig2, putative	18165264	-	-	-	-
CCM_04446	135.165	23.6424	-2.51527	0.0001442	0.0123561	NW_006271971.1	GO:0016021	-	opiNOG41983	R	-	phosphoglycerate mutase family protein, putative	18166469	-	GO:0016021//integral component of membrane;	-	-
CCM_04912	219.369	18.135	-3.59651	0.00014661	0.0124515	NW_006271971.1	GO:0016021	-	opiNOG42892;sordNOG12565	S	-	hypothetical protein	18166933	-	GO:0016021//integral component of membrane;	-	-
CCM_02764	1767.8	495.904	-1.83382	0.00014908	0.0125502	NW_006271970.1	GO:0016884	-	opiNOG06348;sordNOG10611;sorNOG07259	J	sp|A4J6Z8|GATA_DESRM Glutamyl-tRNA(Gln) amidotransferase subunit A OS=Desulfotomaculum reducens (strain MI-1) GN=gatA PE=3 SV=1	Amidase	18164791	-	-	GO:0016884//carbon-nitrogen ligase activity, with glutamine as amido-N-donor;	-
CCM_04992	969.173	244.096	-1.98931	0.000151232	0.0125958	NW_006271971.1	GO:0004553;GO:0016021;GO:0030246;GO:0016740;GO:0005975	-	COG2273;sordNOG11888	GR	sp|D4ALQ5|CRH11_ARTBC Probable extracellular glycosidase ARB_05253 OS=Arthroderma benhamiae (strain ATCC MYA-4681 / CBS 112371) GN=ARB_05253 PE=1 SV=2	Concanavalin A-like lectin/glucanase	18167012	GO:0005975//carbohydrate metabolic process;	GO:0016021//integral component of membrane;	GO:0004553//hydrolase activity, hydrolyzing O-glycosyl compounds;GO:0030246//carbohydrate binding;GO:0016740//transferase activity;	-
CCM_03699	443.543	195.092	-1.18492	0.000154738	0.0125958	NW_006271971.1	-	-	necNOG13965;NOG188330;hypNOG10624;opiNOG64126;saccNOG09281	ORS	-	GLEYA adhesin domain	18165723	-	-	-	-
CCM_02755	165.747	44.8425	-1.88605	0.000181995	0.0144348	NW_006271970.1	GO:0016021;GO:0019915;GO:0005789	-	opiNOG27087;sordNOG04974;opiNOG43179;sorNOG05761	IS	sp|Q9HGM4|SCS3_SCHPO FIT family protein scs3 OS=Schizosaccharomyces pombe (strain 972 / ATCC 24843) GN=scs3 PE=3 SV=1	alpha-galactosidase	18164782	GO:0019915//lipid storage;	GO:0016021//integral component of membrane;GO:0005789//endoplasmic reticulum membrane;	-	-
CCM_00537	551.461	151.413	-1.86477	0.000239334	0.0185305	NW_006271969.1	GO:0016787	-	sordNOG06635;opiNOG03748	RS	sp|Q9HB07|MYG1_HUMAN UPF0160 protein MYG1, mitochondrial OS=Homo sapiens GN=C12orf10 PE=1 SV=2	MYG1 protein	18162572	-	-	GO:0016787//hydrolase activity;	-
CCM_04185	720.434	334.913	-1.10508	0.000239426	0.0185305	NW_006271971.1	GO:0005634;GO:0005829;GO:0004106;GO:0046417;GO:0009094;GO:0006571	K01850	opiNOG09200;sorNOG03008;sordNOG09884	E	sp|P32178|CHMU_YEAST Chorismate mutase OS=Saccharomyces cerevisiae (strain ATCC 204508 / S288c) GN=ARO7 PE=1 SV=1	Chorismate mutase, AroQ class, eukaryotic type	18166208	GO:0046417//chorismate metabolic process;GO:0009094//L-phenylalanine biosynthetic process;GO:0006571//tyrosine biosynthetic process;	GO:0005634//nucleus;GO:0005829//cytosol;	GO:0004106//chorismate mutase activity;	ko00400(Phenylalanine, tyrosine and tryptophan biosynthesis)
CCM_06029	191.325	63.9267	-1.58153	0.000278278	0.0210286	NW_006271972.1	GO:0016021	K14209	sordNOG09267	E	sp|P36062|AVT3_YEAST Vacuolar amino acid transporter 3 OS=Saccharomyces cerevisiae (strain ATCC 204508 / S288c) GN=AVT3 PE=1 SV=1	amino acid transporter	18168046	-	GO:0016021//integral component of membrane;	-	ko04974(Protein digestion and absorption);ko04138(Autophagy - yeast)
CCM_09156	380.653	46.0231	-3.04805	0.000283057	0.0210582	NW_006271976.1	-	-	necNOG13283;opiNOG66310	R	-	hypothetical protein	18171159	-	-	-	-
CCM_02497	96.7491	31.6682	-1.61121	0.000303884	0.0220938	NW_006271970.1	-	-	sordNOG04094;opiNOG39363;opiNOG31379	S	-	galactose-proton symport, putative	18164524	-	-	-	-
CCM_09684	426.21	140.273	-1.60333	0.000325175	0.023464	NW_006271974.1	GO:0016773;GO:0016310;GO:0016301;GO:0005975	K00854	sordNOG08206;opiNOG03555	G	sp|B0Y4D5|XKS1_ASPFC Probable D-xylulose kinase A OS=Neosartorya fumigata (strain CEA10 / CBS 144.89 / FGSC A1163) GN=xkiA PE=2 SV=1	D-xylulose kinase	18171686	GO:0016310//phosphorylation;GO:0005975//carbohydrate metabolic process;	-	GO:0016773//phosphotransferase activity, alcohol group as acceptor;GO:0016301//kinase activity;	ko00040(Pentose and glucuronate interconversions)
CCM_07268	691.818	326.057	-1.08527	0.000354411	0.0244697	NW_006271973.1	GO:0005829;GO:0034975;GO:0072546	K23564	opiNOG04714;sordNOG05247	S	sp|Q9P787|YNY3_SCHPO ER membrane protein complex subunit 3 OS=Schizosaccharomyces pombe (strain 972 / ATCC 24843) GN=SPBC1711.03 PE=3 SV=1	DUF850 domain protein	18169279	GO:0034975//protein folding in endoplasmic reticulum;	GO:0005829//cytosol;GO:0072546//EMC complex;	-	-
CCM_03539	302.865	94.5662	-1.67928	0.000365955	0.0249083	NW_006271970.1	GO:0016021	-	NOG137391;opiNOG39688	S	sp|Q0C9L5|CTVD_ASPTN Citreoviridin biosynthesis protein D OS=Aspergillus terreus (strain NIH 2624 / FGSC A1156) GN=ctvD PE=1 SV=1	hypothetical protein	18165565	-	GO:0016021//integral component of membrane;	-	-
CCM_03159	471.455	221.092	-1.09248	0.00037746	0.0255105	NW_006271970.1	-	-	hypNOG12646;necNOG13334	S	-	hypothetical protein	18165186	-	-	-	-
CCM_03833	361.801	165.088	-1.13196	0.000404635	0.0269673	NW_006271971.1	GO:0008199;GO:0016021;GO:0055114;GO:0016702;GO:0006725	-	sordNOG10081;sorNOG00418;opiNOG09675	R	-	extracellular dioxygenase	18165856	GO:0055114//obsolete oxidation-reduction process;GO:0006725//cellular aromatic compound metabolic process;	GO:0016021//integral component of membrane;	GO:0008199//ferric iron binding;GO:0016702//oxidoreductase activity, acting on single donors with incorporation of molecular oxygen, incorporation of two atoms of oxygen;	-
CCM_09276	364.653	143.51	-1.34538	0.000409968	0.0271342	NW_006271976.1	GO:0016853;GO:0008152	-	opiNOG31100;opiNOG06679;sordNOG08004	I	sp|A4YI89|HPCD_METS5 3-hydroxypropionyl-coenzyme A dehydratase OS=Metallosphaera sedula (strain ATCC 51363 / DSM 5348 / JCM 9185 / NBRC 15509 / TH2) GN=Msed_2001 PE=1 SV=1	enoyl-CoA hydratase	18171279	GO:0008152//metabolic process;	-	GO:0016853//isomerase activity;	-
CCM_06018	421.841	192.238	-1.13381	0.000420866	0.0275113	NW_006271972.1	GO:0005739;GO:0051287;GO:0047046;GO:0000287;GO:0055114;GO:0009085	K05824	sordNOG06898	E	sp|O14104|LYS12_SCHPO Homoisocitrate dehydrogenase OS=Schizosaccharomyces pombe (strain 972 / ATCC 24843) GN=lys12 PE=1 SV=1	homoisocitrate dehydrogenase	18168036	GO:0055114//obsolete oxidation-reduction process;GO:0009085//lysine biosynthetic process;	GO:0005739//mitochondrion;	GO:0051287//NAD binding;GO:0047046//homoisocitrate dehydrogenase activity;GO:0000287//magnesium ion binding;	ko00300(Lysine biosynthesis)
CCM_05753	722.737	344.669	-1.06826	0.000446322	0.0283666	NW_006271972.1	-	-	-	-	-	hypothetical protein	18167771	-	-	-	-
CCM_08230	374.434	178.191	-1.07129	0.000458659	0.0286974	NW_006271974.1	-	-	NOG106015;opiNOG21401;opiNOG00668	RS	sp|D4B0V1|E13B_ARTBC Probable glucan endo-1,3-beta-glucosidase ARB_02077 OS=Arthroderma benhamiae (strain ATCC MYA-4681 / CBS 112371) GN=ARB_02077 PE=1 SV=1	LysM domain protein	18170238	-	-	-	-
CCM_00894	189.194	68.948	-1.45628	0.000496649	0.030399	NW_006271969.1	GO:0016740	-	NOG111989;sordNOG10097	S	sp|P41929|LYC1_YARLI Lysine acetyltransferase OS=Yarrowia lipolytica (strain CLIB 122 / E 150) GN=LYC1 PE=4 SV=2	GNAT family acetyltransferase, putative	18162928	-	-	GO:0016740//transferase activity;	-
CCM_06932	545.981	263.363	-1.0518	0.000501312	0.03045	NW_006271973.1	GO:0050660;GO:0055114;GO:0002943;GO:0017150;GO:0005739	K05545	sordNOG07681	J	sp|Q32M08|DUS4L_MOUSE tRNA-dihydrouridine(20a/20b) synthase [NAD(P)+]-like OS=Mus musculus GN=Dus4l PE=2 SV=1	dihydrouridine synthase 4-like protein	18168943	GO:0055114//obsolete oxidation-reduction process;GO:0002943//tRNA dihydrouridine synthesis;	GO:0005739//mitochondrion;	GO:0050660//flavin adenine dinucleotide binding;GO:0017150//tRNA dihydrouridine synthase activity;	-
CCM_08846	478.897	229.951	-1.05839	0.000516134	0.031153	NW_006271975.1	GO:0016597;GO:0004585;GO:0005829;GO:0005739;GO:0042450	K00611	opiNOG02297;sordNOG04115	E	sp|P0CL21|OTC_COCIM Ornithine carbamoyltransferase, mitochondrial OS=Coccidioides immitis (strain RS) GN=CIMG_04084 PE=1 SV=1	ornithine carbamoyltransferase	18170851	GO:0042450//arginine biosynthetic process via ornithine;	GO:0005829//cytosol;GO:0005739//mitochondrion;	GO:0016597//amino acid binding;GO:0004585//ornithine carbamoyltransferase activity;	ko00220(Arginine biosynthesis)
CCM_03161	279.818	126.224	-1.14851	0.000540481	0.0322174	NW_006271970.1	GO:0006637;GO:0047617	K11992	opiNOG02455;sordNOG06113	I	sp|O14734|ACOT8_HUMAN Acyl-coenzyme A thioesterase 8 OS=Homo sapiens GN=ACOT8 PE=1 SV=1	acyl-CoA thioesterase II	18165188	GO:0006637//acyl-CoA metabolic process;	-	GO:0047617//acyl-CoA hydrolase activity;	ko04146(Peroxisome);ko00120(Primary bile acid biosynthesis)
CCM_05157	347.725	58.5392	-2.57047	0.000554045	0.032822	NW_006271972.1	-	-	hypNOG09653;necNOG12491	S	-	hypothetical protein	18167176	-	-	-	-
CCM_06636	78.9701	26.1836	-1.59264	0.000588384	0.0340164	NW_006271973.1	-	-	opiNOG28819;sorNOG04740	S	-	hypothetical protein	18168650	-	-	-	-
CCM_09418	3848.82	1092.93	-1.81621	0.000624342	0.0352459	NW_006271977.1	-	-	NOG179698	S	-	hypothetical protein	18171421	-	-	-	-
CCM_04360	585.483	289.864	-1.01425	0.000641836	0.0358122	NW_006271971.1	-	-	-	-	-	hypothetical protein	18166383	-	-	-	-
CCM_07713	769.988	293.746	-1.39027	0.000665488	0.0369173	NW_006271974.1	GO:0016620;GO:0055114	-	opiNOG17606;sordNOG10662	C	sp|Q3BXK7|BETB_XANC5 NAD/NADP-dependent betaine aldehyde dehydrogenase OS=Xanthomonas campestris pv. vesicatoria (strain 85-10) GN=betB PE=3 SV=1	betaine aldehyde dehydrogenase	18169723	GO:0055114//obsolete oxidation-reduction process;	-	GO:0016620//oxidoreductase activity, acting on the aldehyde or oxo group of donors, NAD or NADP as acceptor;	-
CCM_00476	107.772	40.0603	-1.42774	0.000733376	0.0402171	NW_006271969.1	GO:0006357;GO:0008270;GO:0005634;GO:0000981	-	eurotNOG11501;opiNOG50666	S	-	Fungal transcriptional regulatory protein	18162511	GO:0006357//regulation of transcription by RNA polymerase II;	GO:0005634//nucleus;	GO:0008270//zinc ion binding;GO:0000981//DNA-binding transcription factor activity, RNA polymerase II-specific;	-
CCM_00350	262.176	122.503	-1.09771	0.000745027	0.0403956	NW_006271969.1	GO:0006506;GO:0097502;GO:0016021;GO:0004584	K07542	opiNOG07569;sordNOG11222	G	sp|Q4I0K3|GPI18_GIBZE GPI mannosyltransferase 2 OS=Gibberella zeae (strain PH-1 / ATCC MYA-4620 / FGSC 9075 / NRRL 31084) GN=GPI18 PE=3 SV=1	DUF409 domain protein	18162385	GO:0006506//GPI anchor biosynthetic process;GO:0097502//mannosylation;	GO:0016021//integral component of membrane;	GO:0004584//obsolete dolichyl-phosphate-mannose-glycolipid alpha-mannosyltransferase activity;	ko00563(Glycosylphosphatidylinositol (GPI)-anchor biosynthesis)
CCM_01473	155.659	62.373	-1.3194	0.00076944	0.0414849	NW_006271969.1	-	-	COG0666	R	-	ankyrin	18163504	-	-	-	-
CCM_04289	125.632	49.8871	-1.33246	0.000791184	0.0419502	NW_006271971.1	GO:0005829;GO:0005634;GO:0045943;GO:0031929;GO:0009966;GO:0019898	K17606	sordNOG04832	T	sp|Q9Y7T1|YCJ5_SCHPO Uncharacterized protein C63.05 OS=Schizosaccharomyces pombe (strain 972 / ATCC 24843) GN=SPCC63.05 PE=3 SV=1	TOR signaling pathway regulator (TapA), putative	18166312	GO:0045943//positive regulation of transcription by RNA polymerase I;GO:0031929//TOR signaling;GO:0009966//regulation of signal transduction;	GO:0005829//cytosol;GO:0005634//nucleus;GO:0019898//extrinsic component of membrane;	-	ko04140(Autophagy - animal);ko04138(Autophagy - yeast);ko04136(Autophagy - other)
CCM_00881	430.956	146.228	-1.55932	0.000909673	0.0470745	NW_006271969.1	GO:0008271;GO:1902358;GO:0016021	K14708	opiNOG03136;sordNOG04999;pleNOG04691	P	sp|P23622|CYS14_NEUCR Sulfate permease 2 OS=Neurospora crassa (strain ATCC 24698 / 74-OR23-1A / CBS 708.71 / DSM 1257 / FGSC 987) GN=cys-14 PE=2 SV=3	sulfate permease 2	18162915	GO:1902358//sulfate transmembrane transport;	GO:0016021//integral component of membrane;	GO:0008271//secondary active sulfate transmembrane transporter activity;	-
CCM_01650	190.525	43.0983	-2.14428	0.000912354	0.0470745	NW_006271969.1	-	-	NOG121180	S	-	hypothetical protein	18163680	-	-	-	-
CCM_08670	258.128	122.875	-1.0709	0.000962069	0.0493742	NW_006271975.1	-	-	opiNOG50068;opiNOG01399;COG0667	C	sp|Q09923|YAKC_SCHPO Aldo-keto reductase yakc [NADP(+)] OS=Schizosaccharomyces pombe (strain 972 / ATCC 24843) GN=yakc PE=1 SV=1	aldo/keto reductase	18170676	-	-	-	-
CCM_00856	321.253	154.924	-1.05215	0.000970791	0.0495568	NW_006271969.1	GO:0055114;GO:0016491;GO:0016021	K06123	sordNOG05715;sorNOG01800;opiNOG17465	Q	sp|Q09851|AYR1_SCHPO NADPH-dependent 1-acyldihydroxyacetone phosphate reductase OS=Schizosaccharomyces pombe (strain 972 / ATCC 24843) GN=ayr1 PE=3 SV=2	short chain dehydrogenase/reductase	18162890	GO:0055114//obsolete oxidation-reduction process;	GO:0016021//integral component of membrane;	GO:0016491//oxidoreductase activity;	ko00565(Ether lipid metabolism);ko00564(Glycerophospholipid metabolism)
CCM_07915	99.0518	36.4988	-1.44033	0.000976761	0.0495978	NW_006271974.1	-	-	opiNOG75920;opiNOG56186;COG2320	SR	sp|Q9KBN7|Y1888_BACHD UPF0157 protein BH1888 OS=Bacillus halodurans (strain ATCC BAA-125 / DSM 18197 / FERM 7344 / JCM 9153 / C-125) GN=BH1888 PE=3 SV=1	GrpB domain protein	18169925	-	-	-	-
CCM_01811	280.779	117.242	-1.25995	0.00101994	0.0512482	NW_006271969.1	GO:0016747;GO:0006633	K09458	sordNOG07191	H	sp|Q8L3X9|KASM_ARATH 3-oxoacyl-[acyl-carrier-protein] synthase, mitochondrial OS=Arabidopsis thaliana GN=KAS PE=1 SV=1	3-oxoacyl-(acyl-carrier-protein) synthase 2	18163841	GO:0006633//fatty acid biosynthetic process;	-	GO:0016747//acyltransferase activity, transferring groups other than amino-acyl groups;	ko00780(Biotin metabolism);ko00061(Fatty acid biosynthesis)
CCM_03123	873.61	280.146	-1.64081	0.00105207	0.0516711	NW_006271970.1	GO:0006629;GO:0016021;GO:0030729	K01907	opiNOG17052;opiNOG05394;sordNOG10305	I	sp|Q5ZLG0|AACS_CHICK Acetoacetyl-CoA synthetase OS=Gallus gallus GN=AACS PE=2 SV=1	acetoacetyl-CoA synthase	18165150	GO:0006629//lipid metabolic process;	GO:0016021//integral component of membrane;	GO:0030729//acetoacetate-CoA ligase activity;	ko00650(Butanoate metabolism);ko00280(Valine, leucine and isoleucine degradation)
CCM_07278	131	35.6378	-1.87808	0.00106066	0.0516711	NW_006271973.1	GO:0016301;GO:0016310;GO:0005524	-	sorNOG05364;opiNOG57264	S	-	zeta toxin family protein	18169289	GO:0016310//phosphorylation;	-	GO:0016301//kinase activity;GO:0005524//ATP binding;	-
CCM_04721	32.3293	5.83597	-2.4698	0.00113485	0.054456	NW_006271971.1	-	-	opiNOG25793	S	-	hypothetical protein	18166742	-	-	-	-
CCM_07989	236.725	45.4529	-2.38077	0.00119632	0.0567129	NW_006271974.1	GO:0050660;GO:0055114;GO:0016627	-	pleNOG06589;opiNOG21111	R	sp|P54998|SOXC_RHOSG Dibenzothiophene desulfurization enzyme C OS=Rhodococcus sp. (strain IGTS8) GN=soxC PE=1 SV=1	thermophilic desulfurizing enzyme family protein	18169999	GO:0055114//obsolete oxidation-reduction process;	-	GO:0050660//flavin adenine dinucleotide binding;GO:0016627//oxidoreductase activity, acting on the CH-CH group of donors;	-
CCM_08700	117.258	36.5848	-1.68037	0.00123727	0.0570871	NW_006271975.1	GO:0016021;GO:0098655;GO:0019829;GO:0030001;GO:0046872;GO:0000166	K01532	opiNOG08641;sordNOG10509	P	sp|P38360|ATU1_YEAST P-type cation-transporting ATPase OS=Saccharomyces cerevisiae (strain ATCC 204508 / S288c) GN=PCA1 PE=1 SV=2	cation transport ATPase	18170706	GO:0098655//cation transmembrane transport;GO:0030001//metal ion transport;	GO:0016021//integral component of membrane;	GO:0019829//ATPase-coupled cation transmembrane transporter activity;GO:0046872//metal ion binding;GO:0000166//nucleotide binding;	-
CCM_02560	9359.32	3589.94	-1.38244	0.0013063	0.0596981	NW_006271970.1	GO:0004252;GO:0006508	K01279	opiNOG17772	O	sp|Q70J59|SED2_ASPFU Tripeptidyl-peptidase sed2 OS=Neosartorya fumigata (strain ATCC MYA-4609 / Af293 / CBS 101355 / FGSC A1100) GN=sed2 PE=1 SV=1	tripeptidyl peptidase	18164587	GO:0006508//proteolysis;	-	GO:0004252//serine-type endopeptidase activity;	ko04142(Lysosome)
CCM_03274	236.453	103.798	-1.18777	0.0013779	0.0626105	NW_006271970.1	GO:0016021	-	hypNOG07462;sordNOG07562;opiNOG03137	S	-	Regulator of G protein signaling superfamily	18165300	-	GO:0016021//integral component of membrane;	-	-
CCM_05706	79.5993	23.6667	-1.7499	0.0014322	0.0639293	NW_006271972.1	GO:0008080;GO:0016787	-	sordNOG13476	R	-	putative acetyltransferase	18167724	-	-	GO:0008080//N-acetyltransferase activity;GO:0016787//hydrolase activity;	-
CCM_04659	309.726	151.879	-1.02807	0.00165372	0.071726	NW_006271971.1	GO:0016705;GO:0020037;GO:0005506;GO:0004497;GO:0016021;GO:0055114	-	sordNOG09016;opiNOG24252	Q	sp|Q9Y758|CP52M_DEBHN Cytochrome P450 52A13 OS=Debaryomyces hansenii GN=CYP52A13 PE=2 SV=1	cytochrome P450 alkane hydroxylase	18166681	GO:0055114//obsolete oxidation-reduction process;	GO:0016021//integral component of membrane;	GO:0016705//oxidoreductase activity, acting on paired donors, with incorporation or reduction of molecular oxygen;GO:0020037//heme binding;GO:0005506//iron ion binding;GO:0004497//monooxygenase activity;	-
CCM_06272	131.772	0	-Inf	0.00166977	0.071726	NW_006271972.1	GO:0050525;GO:0008152;GO:0005576	K08095	sordNOG13469;opiNOG51281	R	sp|Q9Y7G8|CUTI_PYRBR Cutinase OS=Pyrenopeziza brassicae PE=3 SV=1	cutinase precursor, putative	18168287	GO:0008152//metabolic process;	GO:0005576//extracellular region;	GO:0050525//cutinase activity;	-
CCM_07413	127.905	52.765	-1.27742	0.0016816	0.071726	NW_006271974.1	GO:0005524	-	COG0464;opiNOG19869;opiNOG04334	O	-	AAA family ATPase	18169424	-	-	GO:0005524//ATP binding;	-
CCM_08217	2795.84	895.575	-1.64239	0.00170368	0.0717715	NW_006271974.1	GO:0010181;GO:0055114;GO:0016491	K00101	COG1304;opiNOG10171	C	sp|P09437|CYB2_WICAO Cytochrome b2, mitochondrial OS=Wickerhamomyces anomalus GN=CYB2 PE=1 SV=2	L-lactate dehydrogenase, putative	18170225	GO:0055114//obsolete oxidation-reduction process;	-	GO:0010181//FMN binding;GO:0016491//oxidoreductase activity;	ko00620(Pyruvate metabolism)
CCM_01613	72.9037	25.4477	-1.51846	0.00179827	0.0740688	NW_006271969.1	GO:0016740	-	sordNOG07716;opiNOG20784	S	sp|B8NM79|USTS_ASPFN Glutathione S-transferase-like protein ustS OS=Aspergillus flavus (strain ATCC 200026 / FGSC A1120 / NRRL 3357 / JCM 12722 / SRRC 167) GN=ustS PE=1 SV=2	Glutathione S-transferase	18163643	-	-	GO:0016740//transferase activity;	-
CCM_06269	1310.12	638.66	-1.03657	0.0018208	0.0746761	NW_006271972.1	GO:0005524;GO:0060543;GO:0005634;GO:0032508;GO:0033567;GO:0036297;GO:0043138;GO:0016021;GO:0070336;GO:0000725	K19717	opiNOG34746;opiNOG41984;fuNOG14817	S	-	hypothetical protein	18168284	GO:0060543//negative regulation of strand invasion;GO:0032508//DNA duplex unwinding;GO:0033567//DNA replication, Okazaki fragment processing;GO:0036297//interstrand cross-link repair;GO:0000725//recombinational repair;	GO:0005634//nucleus;GO:0016021//integral component of membrane;	GO:0005524//ATP binding;GO:0043138//3'-5' DNA helicase activity;GO:0070336//flap-structured DNA binding;	ko04139(Mitophagy - yeast)
CCM_07880	1216.75	288.86	-2.07459	0.00188915	0.0771497	NW_006271974.1	GO:0046872;GO:0004177;GO:0006508	K01264	opiNOG45917;sordNOG06028	OP	sp|P96264|LPQL_MYCTU Probable lipoprotein aminopeptidase LpqL OS=Mycobacterium tuberculosis (strain ATCC 25618 / H37Rv) GN=lpqL PE=1 SV=1	aminopeptidase Y	18169890	GO:0006508//proteolysis;	-	GO:0046872//metal ion binding;GO:0004177//aminopeptidase activity;	-
CCM_08999	171.651	65.6906	-1.38572	0.00197488	0.0799702	NW_006271975.1	GO:0016021;GO:0022891;GO:0008643;GO:0055085	-	opiNOG15677;pleNOG06795	R	sp|Q9XIH7|PLT1_ARATH Putative polyol transporter 1 OS=Arabidopsis thaliana GN=PLT1 PE=3 SV=1	plastidic glucose transporter 4	18171003	GO:0008643//carbohydrate transport;GO:0055085//transmembrane transport;	GO:0016021//integral component of membrane;	-	-
CCM_05910	336.161	148.086	-1.18272	0.00200951	0.0806915	NW_006271972.1	GO:0051259;GO:0051087;GO:0006457	K04082	sordNOG13370	O	sp|P53193|JAC1_YEAST J-type co-chaperone JAC1, mitochondrial OS=Saccharomyces cerevisiae (strain ATCC 204508 / S288c) GN=JAC1 PE=1 SV=1	co-chaperone protein HscB	18167928	GO:0051259//protein complex oligomerization;GO:0006457//protein folding;	-	GO:0051087//chaperone binding;	-
CCM_08092	87.762	25.0576	-1.80835	0.00206583	0.08256	NW_006271974.1	-	-	opiNOG31079;sordNOG13429	S	sp|Q8G9F9|INHA_PSEPU Isonitrile hydratase OS=Pseudomonas putida GN=inhA PE=1 SV=1	DJ-1/PfpI family protein	18170101	-	-	-	-
CCM_05930	627.672	266.969	-1.23334	0.00209045	0.08256	NW_006271972.1	-	-	sorNOG06794;opiNOG38382;sordNOG14180	RS	-	hypothetical protein	18167948	-	-	-	-
CCM_08853	245.949	121.836	-1.01342	0.00213761	0.0840763	NW_006271975.1	GO:0008080	-	sordNOG12593;opiNOG30974	R	-	Acyl-CoA N-acyltransferase	18170858	-	-	GO:0008080//N-acetyltransferase activity;	-
CCM_02146	6035.17	304.567	-4.30857	0.00217478	0.0848428	NW_006271970.1	GO:0004185;GO:0006508	-	pleNOG01590;opiNOG07609;sordNOG10805;sorNOG03135	O	sp|C7YQJ2|CBPYA_NECH7 Carboxypeptidase Y homolog A OS=Nectria haematococca (strain 77-13-4 / ATCC MYA-4622 / FGSC 9596 / MPVI) GN=CPYA PE=3 SV=1	carboxypeptidase Y	18164174	GO:0006508//proteolysis;	-	GO:0004185//serine-type carboxypeptidase activity;	-
CCM_01810	263.486	124.071	-1.08656	0.0022538	0.0872167	NW_006271969.1	GO:0016021;GO:0055085	-	sordNOG06264;opiNOG00360	T	sp|P40900|ISP4_SCHPO Sexual differentiation process protein isp4 OS=Schizosaccharomyces pombe (strain 972 / ATCC 24843) GN=isp4 PE=2 SV=2	small oligopeptide transporter, OPT family	18163840	GO:0055085//transmembrane transport;	GO:0016021//integral component of membrane;	-	-
CCM_08259	3123.14	786.286	-1.98987	0.00239026	0.0917574	NW_006271975.1	GO:0055085;GO:0016021	-	sordNOG11322;opiNOG17879	G	sp|Q5ATG7|APDF_EMENI Aspyridones efflux protein apdF OS=Emericella nidulans (strain FGSC A4 / ATCC 38163 / CBS 112.46 / NRRL 194 / M139) GN=apdF PE=2 SV=1	MFS monocarboxylate transporter, putative	18170267	GO:0055085//transmembrane transport;	GO:0016021//integral component of membrane;	-	-
CCM_02234	231.326	114.084	-1.01983	0.00245696	0.0932569	NW_006271970.1	GO:0003684;GO:0008534;GO:0006284;GO:0006289	K03660	sordNOG10964;opiNOG03239;sorNOG03596	L	sp|O15527|OGG1_HUMAN N-glycosylase/DNA lyase OS=Homo sapiens GN=OGG1 PE=1 SV=2	N-glycosylase/DNA lyase	18164261	GO:0006284//base-excision repair;GO:0006289//nucleotide-excision repair;	-	GO:0003684//damaged DNA binding;GO:0008534//oxidized purine nucleobase lesion DNA N-glycosylase activity;	ko03410(Base excision repair)
CCM_05575	214.952	103.651	-1.05229	0.00248813	0.0932569	NW_006271972.1	GO:0042254;GO:0005634	K14852	sordNOG05890;opiNOG13127	J	sp|Q08746|RRS1_YEAST Regulator of ribosome biosynthesis OS=Saccharomyces cerevisiae (strain ATCC 204508 / S288c) GN=RRS1 PE=1 SV=1	ribosome biogenesis protein	18167593	GO:0042254//ribosome biogenesis;	GO:0005634//nucleus;	-	-
CCM_08012	804.316	281.352	-1.51539	0.00261166	0.0956037	NW_006271974.1	GO:0055114;GO:0004497;GO:0020037;GO:0005506;GO:0016705	-	opiNOG11398;COG2124	Q	sp|A0A1B4XBH0|SDNE_SORAA Cytochrome P450 monooxygenase sdnE OS=Sordaria araneosa GN=sdnE PE=3 SV=1	Cytochrome P450	18170021	GO:0055114//obsolete oxidation-reduction process;	-	GO:0004497//monooxygenase activity;GO:0020037//heme binding;GO:0005506//iron ion binding;GO:0016705//oxidoreductase activity, acting on paired donors, with incorporation or reduction of molecular oxygen;	-
CCM_01904	527.024	170.959	-1.62422	0.00263988	0.0959656	NW_006271969.1	GO:0005975;GO:0016787;GO:0030246	-	COG1554;opiNOG04245	G	sp|D4B5H9|ATC1_ARTBC Cell wall acid trehalase ARB_03719 OS=Arthroderma benhamiae (strain ATCC MYA-4681 / CBS 112371) GN=ARB_03719 PE=1 SV=1	alpha,alpha-trehalose glucohydrolase TreA/Ath1	18163933	GO:0005975//carbohydrate metabolic process;	-	GO:0016787//hydrolase activity;GO:0030246//carbohydrate binding;	-
CCM_09076	21500.7	9622.13	-1.15995	0.00279035	0.100296	NW_006271975.1	GO:0015398;GO:0015200;GO:0001403;GO:0072489;GO:0005794;GO:0016021	K03320	sordNOG10713	P	sp|Q9C0V1|AMT1_SCHPO Ammonium transporter 1 OS=Schizosaccharomyces pombe (strain 972 / ATCC 24843) GN=amt1 PE=3 SV=1	ammonium transporter MEP2	18171079	GO:0001403//invasive growth in response to glucose limitation;GO:0072489//methylammonium transmembrane transport;	GO:0005794//Golgi apparatus;GO:0016021//integral component of membrane;	GO:0015398//high-affinity secondary active ammonium transmembrane transporter activity;GO:0015200//methylammonium transmembrane transporter activity;	-
CCM_07526	588.355	271.489	-1.11579	0.00290867	0.103771	NW_006271974.1	-	-	COG0666;opiNOG52916;NOG178054	RS	-	ankyrin repeat-containing protein, putative	18169537	-	-	-	-
CCM_01903	14.7519	0.96955	-3.92744	0.00301084	0.105514	NW_006271969.1	GO:0004185;GO:0006508	K01288	pleNOG00112;opiNOG06570;sordNOG06057	EO	sp|D4AQA7|PEPS_ARTBC Probable serine carboxypeptidase ARB_06414 OS=Arthroderma benhamiae (strain ATCC MYA-4681 / CBS 112371) GN=ARB_06414 PE=1 SV=1	carboxypeptidase cpdS	18163932	GO:0006508//proteolysis;	-	GO:0004185//serine-type carboxypeptidase activity;	-
CCM_08025	2252.29	344.109	-2.71046	0.00301716	0.105514	NW_006271974.1	GO:0005975;GO:0004459;GO:0019752;GO:0055114	K00016	opiNOG12255;sorNOG06623;pleNOG01211	C	sp|Q9P4B6|LDHA_RHIOR L-lactate dehydrogenase A OS=Rhizopus oryzae GN=LDHA PE=3 SV=1	L-lactate dehydrogenase A	18170034	GO:0005975//carbohydrate metabolic process;GO:0019752//carboxylic acid metabolic process;GO:0055114//obsolete oxidation-reduction process;	-	GO:0004459//L-lactate dehydrogenase activity;	ko05230(Central carbon metabolism in cancer);ko04922(Glucagon signaling pathway);ko04066(HIF-1 signaling pathway);ko00640(Propanoate metabolism);ko00620(Pyruvate metabolism);ko00270(Cysteine and methionine metabolism);ko00010(Glycolysis / Gluconeogenesis)
CCM_07265	185.439	91.0201	-1.02669	0.00302556	0.105514	NW_006271973.1	GO:0005739;GO:0006461	K07555	opiNOG05279;sordNOG09638	O	sp|P32453|ATP11_YEAST Protein ATP11, mitochondrial OS=Saccharomyces cerevisiae (strain ATCC 204508 / S288c) GN=ATP11 PE=1 SV=1	F1F0 ATP synthase assembly protein Atp11, putative	18169276	-	GO:0005739//mitochondrion;	-	-
CCM_00375	1806.62	431.573	-2.06562	0.00306465	0.106178	NW_006271969.1	GO:0055085;GO:0016021	-	opiNOG11471	G	sp|Q9C0V8|YHJ1_SCHPO Uncharacterized transporter PB10D8.01 OS=Schizosaccharomyces pombe (strain 972 / ATCC 24843) GN=SPBPB10D8.01 PE=3 SV=1	putative allantoate permease of the major facilitator superfamily	18162410	GO:0055085//transmembrane transport;	GO:0016021//integral component of membrane;	-	-
CCM_05219	205.743	54.3567	-1.92031	0.00331882	0.113348	NW_006271972.1	GO:0004514;GO:0009435	K00767	opiNOG00922;sordNOG08064	F	sp|P43619|NADC_YEAST Nicotinate-nucleotide pyrophosphorylase [carboxylating] OS=Saccharomyces cerevisiae (strain ATCC 204508 / S288c) GN=BNA6 PE=1 SV=1	nicotinate-nucleotide pyrophosphorylase	18167238	GO:0009435//NAD biosynthetic process;	-	GO:0004514//nicotinate-nucleotide diphosphorylase (carboxylating) activity;	ko00760(Nicotinate and nicotinamide metabolism)
CCM_03524	85.5847	32.9859	-1.3755	0.00334062	0.113569	NW_006271970.1	GO:0016021	-	opiNOG26484;sordNOG05411;sorNOG07960	S	-	ThiJ/PfpI	18165550	-	GO:0016021//integral component of membrane;	-	-
CCM_07677	265.19	128.294	-1.04757	0.00336207	0.113569	NW_006271974.1	-	-	sorNOG05552;opiNOG39886;sordNOG13255	RS	-	hypothetical protein	18169687	-	-	-	-
CCM_01560	86.6188	35.5604	-1.28441	0.00337263	0.113569	NW_006271969.1	GO:0071949;GO:0055114;GO:0004497	-	opiNOG71163;COG0654;opiNOG24211;opiNOG02763	HSC	sp|A0A0U1LQD9|CCTM_TALIS FAD-dependent monooxygenase cctM OS=Talaromyces islandicus GN=cctM PE=3 SV=1	FAD-dependent monooxygenase	18163591	GO:0055114//obsolete oxidation-reduction process;	-	GO:0071949//FAD binding;GO:0004497//monooxygenase activity;	-
CCM_02746	46.524	5.85546	-2.99012	0.00340695	0.114323	NW_006271970.1	-	-	sorNOG08722;opiNOG46756	R	-	hypothetical protein	18164773	-	-	-	-
CCM_07994	9619.04	4658.18	-1.04613	0.00378714	0.122489	NW_006271974.1	-	-	opiNOG47276;sordNOG15510;hypNOG01707	S	-	hypothetical protein	18170004	-	-	-	-
CCM_04493	112.138	30.4164	-1.88236	0.0038157	0.122489	NW_006271971.1	GO:0016740	K17803	sordNOG06966;opiNOG27896	RS	sp|Q06668|OMS1_YEAST Methyltransferase OMS1, mitochondrial OS=Saccharomyces cerevisiae (strain ATCC 204508 / S288c) GN=OMS1 PE=1 SV=1	ubiquinone/menaquinone biosynthesis-related protein	18166516	-	-	GO:0016740//transferase activity;	-
CCM_05990	767.017	330.898	-1.21287	0.00381621	0.122489	NW_006271972.1	-	-	sordNOG10211;opiNOG49721	S	-	hypothetical protein	18168008	-	-	-	-
CCM_04491	79.1108	30.8782	-1.35729	0.00391807	0.123925	NW_006271971.1	-	-	-	-	-	hypothetical protein	18166514	-	-	-	-
CCM_04624	297.833	110.241	-1.43384	0.003959	0.124572	NW_006271971.1	GO:0004342;GO:0016787;GO:0005975;GO:0006044	K02564	sordNOG10474;opiNOG01632	G	sp|Q5TNH5|GNPI_ANOGA Glucosamine-6-phosphate isomerase OS=Anopheles gambiae GN=Gnpda1 PE=3 SV=3	glucosamine-6-phosphate deaminase	18166646	GO:0005975//carbohydrate metabolic process;GO:0006044//N-acetylglucosamine metabolic process;	-	GO:0004342//glucosamine-6-phosphate deaminase activity;GO:0016787//hydrolase activity;	ko00520(Amino sugar and nucleotide sugar metabolism)
CCM_04866	80.5856	25.2587	-1.67374	0.00409331	0.125909	NW_006271971.1	-	-	eurotNOG10519;sordNOG14290	S	-	hypothetical protein	18166887	-	-	-	-
CCM_00456	171.376	83.7838	-1.03243	0.00439618	0.133937	NW_006271969.1	-	K01049	sorNOG06738;sordNOG10766;opiNOG06838	RT	sp|Q69ZK9|NLGN2_MOUSE Neuroligin-2 OS=Mus musculus GN=Nlgn2 PE=1 SV=2	triacylglycerol lipase, putative	18162491	-	-	-	ko04725(Cholinergic synapse);ko00564(Glycerophospholipid metabolism)
CCM_05728	186.285	88.8992	-1.06727	0.00461251	0.137047	NW_006271972.1	GO:0055114;GO:0016491	-	sordNOG11280;opiNOG08437	S	sp|Q07G10|ALKB8_XENTR Alkylated DNA repair protein alkB homolog 8 OS=Xenopus tropicalis GN=alkbh8 PE=2 SV=2	Oxoglutarate/iron-dependent oxygenase	18167746	GO:0055114//obsolete oxidation-reduction process;	-	GO:0016491//oxidoreductase activity;	-
CCM_00604	65.3809	24.1161	-1.43887	0.0046486	0.137118	NW_006271969.1	-	-	opiNOG41227;euNOG36726;eurotNOG12375	S	sp|S0DRW4|FUB4_GIBF5 Hydrolase FUB4 OS=Gibberella fujikuroi (strain CBS 195.34 / IMI 58289 / NRRL A-6831) GN=FUB4 PE=1 SV=1	DUF341 domain protein	18162639	-	-	-	-
CCM_08485	1098.55	169.482	-2.6964	0.00520927	0.14754	NW_006271975.1	GO:0003824	-	sordNOG04870;sorNOG02315	R	sp|Q2U4L7|GTAA_ASPOR Glutaminase A OS=Aspergillus oryzae (strain ATCC 42149 / RIB 40) GN=gtaA PE=1 SV=2	glutaminase GtaA	18170492	-	-	GO:0003824//catalytic activity;	-
CCM_04227	87.4647	37.5321	-1.22058	0.00524639	0.148087	NW_006271971.1	-	K01266	opiNOG28489;sordNOG06733	S	sp|A0MTQ2|BAPA_SPHMI Beta-peptidyl aminopeptidase BapA OS=Sphingosinicella microcystinivorans PE=1 SV=1	peptidase family T4 protein	18166250	-	-	-	-
CCM_02693	114.25	52.7068	-1.11613	0.00526571	0.148197	NW_006271970.1	GO:0016021;GO:0015109;GO:0015703	-	sorNOG07258;sordNOG09736;opiNOG16829	SP	-	chromate ion transporter	18164720	GO:0015703//chromate transport;	GO:0016021//integral component of membrane;	GO:0015109//chromate transmembrane transporter activity;	-
CCM_04688	554.838	173.392	-1.67803	0.00540658	0.150573	NW_006271971.1	-	-	sordNOG14293	S	-	hypothetical protein	18166710	-	-	-	-
CCM_04093	615.582	243.442	-1.33837	0.0054129	0.150573	NW_006271971.1	GO:0005829;GO:0005634;GO:0043248;GO:0000502;GO:0006974;GO:0006511	K11599	sordNOG12810;opiNOG34743	O	sp|P38293|UMP1_YEAST Proteasome maturation factor UMP1 OS=Saccharomyces cerevisiae (strain ATCC 204508 / S288c) GN=UMP1 PE=1 SV=1	20S proteasome maturation protein Ump1	18166116	GO:0043248//proteasome assembly;GO:0006974//cellular response to DNA damage stimulus;GO:0006511//ubiquitin-dependent protein catabolic process;	GO:0005829//cytosol;GO:0005634//nucleus;GO:0000502//proteasome complex;	-	ko03050(Proteasome)
CCM_01964	617.088	285.933	-1.1098	0.00554024	0.153227	NW_006271970.1	GO:0016021	-	chaNOG07821;sorNOG08178;NOG159994	SR	-	hypothetical protein	18163993	-	GO:0016021//integral component of membrane;	-	-
CCM_08220	50.7209	17.3175	-1.55035	0.00565523	0.155958	NW_006271974.1	-	-	opiNOG31079;sordNOG13429	S	sp|Q8G9F9|INHA_PSEPU Isonitrile hydratase OS=Pseudomonas putida GN=inhA PE=1 SV=1	ThiJ/PfpI family protein	18170228	-	-	-	-
CCM_02017	119.241	56.5664	-1.07587	0.00586696	0.159958	NW_006271970.1	-	-	COG2320;opiNOG56186	S	sp|Q9KBN7|Y1888_BACHD UPF0157 protein BH1888 OS=Bacillus halodurans (strain ATCC BAA-125 / DSM 18197 / FERM 7344 / JCM 9153 / C-125) GN=BH1888 PE=3 SV=1	GrpB domain protein	18164046	-	-	-	-
CCM_07810	75.7224	24.8317	-1.60854	0.00606578	0.162296	NW_006271974.1	-	-	NOG133324	S	-	hypothetical protein	18169820	-	-	-	-
CCM_03644	31.6137	7.85179	-2.00945	0.00633934	0.166681	NW_006271971.1	-	-	-	-	-	hypothetical protein	18165670	-	-	-	-
CCM_02266	2089.02	1029.12	-1.02142	0.00642085	0.166923	NW_006271970.1	GO:0016788	-	opiNOG11122	R	sp|P08540|PHOX_KLULA Probable acid phosphatase OS=Kluyveromyces lactis (strain ATCC 8585 / CBS 2359 / DSM 70799 / NBRC 1267 / NRRL Y-1140 / WM37) GN=KLLA0B14839g PE=4 SV=2	acid phosphatase	18164293	-	-	GO:0016788//hydrolase activity, acting on ester bonds;	-
CCM_08809	2924.56	1034.7	-1.49901	0.00643552	0.166923	NW_006271975.1	GO:0050662;GO:0003824	-	opiNOG06831	R	sp|P44094|DEND_HAEIN D-erythronate dehydrogenase OS=Haemophilus influenzae (strain ATCC 51907 / DSM 11121 / KW20 / Rd) GN=denD PE=1 SV=1	nucleoside-diphosphate-sugar epimerase, putative	18170814	-	-	GO:0050662//obsolete coenzyme binding;GO:0003824//catalytic activity;	-
CCM_01982	1959.6	840.863	-1.22062	0.0065592	0.168763	NW_006271970.1	GO:0009099;GO:0046872;GO:0042645;GO:0009097;GO:0055114;GO:0003690;GO:0016853;GO:0000002;GO:0004455	K00053	opiNOG08348;sordNOG05022	E	sp|P38674|ILV5_NEUCR Ketol-acid reductoisomerase, mitochondrial OS=Neurospora crassa (strain ATCC 24698 / 74-OR23-1A / CBS 708.71 / DSM 1257 / FGSC 987) GN=ilv-2 PE=3 SV=2	Ketol-acid reductoisomerase	18164011	GO:0009099//valine biosynthetic process;GO:0009097//isoleucine biosynthetic process;GO:0055114//obsolete oxidation-reduction process;GO:0000002//mitochondrial genome maintenance;	GO:0042645//mitochondrial nucleoid;	GO:0046872//metal ion binding;GO:0003690//double-stranded DNA binding;GO:0016853//isomerase activity;GO:0004455//ketol-acid reductoisomerase activity;	ko00770(Pantothenate and CoA biosynthesis);ko00290(Valine, leucine and isoleucine biosynthesis)
CCM_05574	335.473	135.548	-1.3074	0.00670115	0.171375	NW_006271972.1	GO:0005840	K17408	opiNOG07712;hypNOG08665;necNOG05812	JS	-	mitochondrial ribosomal protein DAP3, putative	18167592	-	GO:0005840//ribosome;	-	-
CCM_03498	203.727	37.7742	-2.43117	0.0067864	0.172471	NW_006271970.1	GO:0015171;GO:0016021;GO:0003333	K19564	COG0531	E	sp|P19807|HNM1_YEAST Choline transport protein OS=Saccharomyces cerevisiae (strain ATCC 204508 / S288c) GN=HNM1 PE=1 SV=1	amino acid/polyamine transporter I	18165524	GO:0003333//amino acid transmembrane transport;	GO:0016021//integral component of membrane;	GO:0015171//amino acid transmembrane transporter activity;	-
CCM_06743	8367.15	4076.72	-1.03733	0.00686179	0.173296	NW_006271973.1	GO:0032991;GO:1901363;GO:0006261;GO:0097159;GO:0031981;GO:0016021	-	sordNOG10345	S	-	hypothetical protein	18168756	GO:0006261//DNA-dependent DNA replication;	GO:0032991//protein-containing complex;GO:0031981//nuclear lumen;GO:0016021//integral component of membrane;	GO:1901363//heterocyclic compound binding;GO:0097159//organic cyclic compound binding;	-
CCM_03226	39.856	12.4782	-1.67539	0.00738846	0.177712	NW_006271970.1	GO:0006469;GO:0006521;GO:0004860;GO:0043022;GO:0003785	-	sordNOG04775;opiNOG24335	S	sp|P25637|YIH1_YEAST Protein IMPACT homolog OS=Saccharomyces cerevisiae (strain ATCC 204508 / S288c) GN=YIH1 PE=1 SV=1	impact family protein	18165252	GO:0006469//negative regulation of protein kinase activity;GO:0006521//regulation of cellular amino acid metabolic process;	-	GO:0004860//protein kinase inhibitor activity;GO:0043022//ribosome binding;GO:0003785//actin monomer binding;	-
CCM_03254	485.819	209.266	-1.21508	0.00744102	0.178083	NW_006271970.1	GO:0005506;GO:0020037;GO:0016705;GO:0055114;GO:0016021;GO:0004497	-	opiNOG49209	Q	sp|Q6UEH4|AFLU_ASPPU Cytodhrome P450 monooxygenase aflU OS=Aspergillus parasiticus (strain ATCC 56775 / NRRL 5862 / SRRC 143 / SU-1) GN=aflU PE=3 SV=1	benzoate 4-monooxygenase cytochrome P450	18165280	GO:0055114//obsolete oxidation-reduction process;	GO:0016021//integral component of membrane;	GO:0005506//iron ion binding;GO:0020037//heme binding;GO:0016705//oxidoreductase activity, acting on paired donors, with incorporation or reduction of molecular oxygen;GO:0004497//monooxygenase activity;	-
CCM_02149	11.4738	0.69134	-4.0528	0.0076584	0.180705	NW_006271970.1	GO:0006637;GO:0047617	-	opiNOG43632;sordNOG04490	S	-	acyl-CoA thioesterase	18164177	GO:0006637//acyl-CoA metabolic process;	-	GO:0047617//acyl-CoA hydrolase activity;	-
CCM_08514	69.7349	28.2804	-1.30208	0.00800419	0.186901	NW_006271975.1	GO:0032259;GO:0008168	-	sorNOG07161;sordNOG05284;hypNOG03231	LR	sp|M2SNN6|LAEA_COCH5 Secondary metabolism regulator LAE1 OS=Cochliobolus heterostrophus (strain C5 / ATCC 48332 / race O) GN=LAE1 PE=3 SV=1	SAM domain methyltransferase, putative	18170521	GO:0032259//methylation;	-	GO:0008168//methyltransferase activity;	-
CCM_07873	137.654	35.9432	-1.93726	0.00808577	0.187437	NW_006271974.1	-	-	euNOG03171;sorNOG04125;opiNOG15198	S	-	C6 finger domain protein, putative	18169883	-	-	-	-
CCM_08353	933.355	447.82	-1.05951	0.00816442	0.18745	NW_006271975.1	GO:0016884	K01426	opiNOG01013;sordNOG10979	TIJ	sp|O59805|YJV7_SCHPO Putative amidase C550.07 OS=Schizosaccharomyces pombe (strain 972 / ATCC 24843) GN=SPCC550.07 PE=3 SV=1	amidase, putative	18170361	-	-	GO:0016884//carbon-nitrogen ligase activity, with glutamine as amido-N-donor;	ko00643(Styrene degradation);ko00627(Aminobenzoate degradation);ko00380(Tryptophan metabolism);ko00360(Phenylalanine metabolism);ko00330(Arginine and proline metabolism)
CCM_02778	438.849	198.039	-1.14794	0.00836719	0.19119	NW_006271970.1	GO:0055114;GO:0010181;GO:0004497	-	sordNOG09325;sorNOG03448;opiNOG16564	S	sp|O67071|Y928_AQUAE Uncharacterized protein aq_928 OS=Aquifex aeolicus (strain VF5) GN=aq_928 PE=3 SV=1	FMN-binding split barrel	18164805	GO:0055114//obsolete oxidation-reduction process;	-	GO:0010181//FMN binding;GO:0004497//monooxygenase activity;	-
CCM_08013	88.8028	34.6845	-1.35631	0.00840684	0.191237	NW_006271974.1	GO:0016614;GO:0050660;GO:0055114	-	opiNOG10343	R	sp|A0A0E0RTV6|ZEB1_GIBZE FAD-linked oxidoreductase ZEB1 OS=Gibberella zeae (strain PH-1 / ATCC MYA-4620 / FGSC 9075 / NRRL 31084) GN=ZEB1 PE=2 SV=2	FAD-binding, type 2	18170022	GO:0055114//obsolete oxidation-reduction process;	-	GO:0016614//oxidoreductase activity, acting on CH-OH group of donors;GO:0050660//flavin adenine dinucleotide binding;	-
CCM_05688	5758.07	1405.23	-2.03478	0.00863564	0.193639	NW_006271972.1	GO:0005975;GO:0005576;GO:0004553;GO:0030248	K01183	opiNOG07753;sorNOG02423;sordNOG09700	G	sp|Q12713|CHI33_TRIHA Endochitinase 33 OS=Trichoderma harzianum GN=chit33 PE=1 SV=1	class III chitinase, putative	18167706	GO:0005975//carbohydrate metabolic process;	GO:0005576//extracellular region;	GO:0004553//hydrolase activity, hydrolyzing O-glycosyl compounds;GO:0030248//cellulose binding;	ko00520(Amino sugar and nucleotide sugar metabolism)
CCM_08801	166.017	71.3226	-1.2189	0.00867044	0.193639	NW_006271975.1	GO:0004309;GO:0005634;GO:0006798;GO:0005737	K01514	sordNOG06656;opiNOG06077	C	sp|O14094|PPX1_SCHPO Putative exopolyphosphatase OS=Schizosaccharomyces pombe (strain 972 / ATCC 24843) GN=SPAC2F3.11 PE=3 SV=1	exopolyphosphatase	18170806	GO:0006798//polyphosphate catabolic process;	GO:0005634//nucleus;GO:0005737//cytoplasm;	GO:0004309//exopolyphosphatase activity;	ko00230(Purine metabolism)
CCM_01148	857.526	292.853	-1.55	0.00889966	0.196345	NW_006271969.1	GO:0043565;GO:0006355;GO:0003700	-	sordNOG15832;opiNOG46882;sordNOG15127	SK	-	Basic leucine zipper	18163180	GO:0006355//regulation of transcription, DNA-templated;	-	GO:0043565//sequence-specific DNA binding;GO:0003700//DNA-binding transcription factor activity;	-
CCM_08091	55.6778	18.4248	-1.59546	0.00996732	0.215929	NW_006271974.1	GO:0016787	-	opiNOG31766;COG2272	IR	sp|D4B1N9|LIP3_ARTBC Probable secreted lipase ARB_02369 OS=Arthroderma benhamiae (strain ATCC MYA-4681 / CBS 112371) GN=ARB_02369 PE=1 SV=1	carboxylesterase	18170100	-	-	GO:0016787//hydrolase activity;	-
CCM_00583	247.882	60.1355	-2.04336	0.0104204	0.224225	NW_006271969.1	GO:0055114;GO:0016491;GO:0016020;GO:0071949	K00480	opiNOG00334	C	sp|Q3S4B7|3HBH_POLNA 3-hydroxybenzoate 6-hydroxylase OS=Polaromonas naphthalenivorans (strain CJ2) GN=nagX PE=1 SV=1	FAD dependent oxidoreductase	18162618	GO:0055114//obsolete oxidation-reduction process;	GO:0016020//membrane;	GO:0016491//oxidoreductase activity;GO:0071949//FAD binding;	ko00626(Naphthalene degradation);ko00624(Polycyclic aromatic hydrocarbon degradation);ko00621(Dioxin degradation)
CCM_08576	496.393	216.047	-1.20014	0.0109476	0.231916	NW_006271975.1	GO:0005759;GO:0034553	-	sordNOG14335;opiNOG41540	S	sp|P38345|SDHF4_YEAST Succinate dehydrogenase assembly factor 4, mitochondrial OS=Saccharomyces cerevisiae (strain ATCC 204508 / S288c) GN=SDH8 PE=1 SV=2	FMP21-like protein	18170582	GO:0034553//mitochondrial respiratory chain complex II assembly;	GO:0005759//mitochondrial matrix;	-	-
CCM_00055	956.972	350.374	-1.44958	0.0111323	0.234316	NW_006271969.1	GO:0055085;GO:0016021	-	opiNOG17406	R	sp|Q0D153|AT331_ASPTN MFS-type transporter ATEG_00331 OS=Aspergillus terreus (strain NIH 2624 / FGSC A1156) GN=ATEG_00331 PE=2 SV=1	multidrug resistance protein fnx1	18162090	GO:0055085//transmembrane transport;	GO:0016021//integral component of membrane;	-	-
CCM_06853	19.1885	3.33345	-2.52516	0.0111335	0.234316	NW_006271973.1	-	-	-	-	-	hypothetical protein	18168864	-	-	-	-
CCM_07881	1071.17	165.66	-2.69289	0.0114662	0.237264	NW_006271974.1	GO:0032259;GO:0008171	-	opiNOG58957;COG4122	SR	sp|Q00719|MDMC_STRMY O-methyltransferase MdmC OS=Streptomyces mycarofaciens GN=mdmC PE=3 SV=1	O-methyltransferase, putative	18169891	GO:0032259//methylation;	-	GO:0008171//O-methyltransferase activity;	-
CCM_00405	63.734	12.427	-2.35859	0.0117529	0.242045	NW_006271969.1	-	-	sordNOG13600	R	-	hypothetical protein	18162440	-	-	-	-
CCM_09664	8344.63	3169.57	-1.39656	0.0117884	0.242256	NW_006271978.1	GO:0016021	-	-	-	-	hypothetical protein	18171666	-	GO:0016021//integral component of membrane;	-	-
CCM_02422	337.559	165.096	-1.03183	0.0118376	0.242433	NW_006271970.1	GO:0016021;GO:0055085	-	sordNOG04101	R	sp|O59726|FNX2_SCHPO Vacuolar membrane amino acid uptake transporter fnx2 OS=Schizosaccharomyces pombe (strain 972 / ATCC 24843) GN=fnx2 PE=3 SV=1	MFS multidrug transporter, putative	18164449	GO:0055085//transmembrane transport;	GO:0016021//integral component of membrane;	-	-
CCM_09233	282.677	93.0051	-1.60377	0.0119176	0.242653	NW_006271976.1	GO:0016021;GO:0008484;GO:0008152	-	opiNOG19445	R	-	sulfatase domain protein	18171236	GO:0008152//metabolic process;	GO:0016021//integral component of membrane;	GO:0008484//sulfuric ester hydrolase activity;	-
CCM_03587	122.636	14.8025	-3.05047	0.0119215	0.242653	NW_006271970.1	GO:0005576;GO:0005975;GO:0030248;GO:0004553	K01183	NOG126988;NOG122945;opiNOG07753	G	sp|E9F9R9|CHI2_METRA Endochitinase 2 OS=Metarhizium robertsii (strain ARSEF 23 / ATCC MYA-3075) GN=chi2 PE=3 SV=2	chitinase 3 precursor, putative	18165613	GO:0005975//carbohydrate metabolic process;	GO:0005576//extracellular region;	GO:0030248//cellulose binding;GO:0004553//hydrolase activity, hydrolyzing O-glycosyl compounds;	ko00520(Amino sugar and nucleotide sugar metabolism)
CCM_05346	710.997	186.617	-1.92976	0.0119342	0.242653	NW_006271972.1	GO:0008270;GO:0006357;GO:0005634;GO:0000981	-	necNOG09999;sordNOG10341;opiNOG20822;sorNOG03784	S	sp|Q5A4F3|AHR1_CANAL Adhesion and hyphal regulator 1 OS=Candida albicans (strain SC5314 / ATCC MYA-2876) GN=AHR1 PE=1 SV=1	C6 finger domain protein, putative	18167364	GO:0006357//regulation of transcription by RNA polymerase II;	GO:0005634//nucleus;	GO:0008270//zinc ion binding;GO:0000981//DNA-binding transcription factor activity, RNA polymerase II-specific;	-
CCM_02162	130.89	37.1274	-1.8178	0.01207	0.243865	NW_006271970.1	GO:0016021	-	sordNOG13967;opiNOG39284	S	-	hypothetical protein	18164190	-	GO:0016021//integral component of membrane;	-	-
CCM_05022	792.635	288.219	-1.45949	0.0138	0.266026	NW_006271971.1	-	-	pleNOG06336	R	-	hypothetical protein	18167042	-	-	-	-
CCM_05951	180.169	64.7319	-1.4768	0.0145389	0.272519	NW_006271972.1	GO:0005506;GO:0019439;GO:0051537;GO:0055114;GO:0016708	-	sordNOG10594;COG4638;opiNOG02374	PRS	sp|P0ABR8|YEAW_ECO57 Putative dioxygenase subunit alpha YeaW OS=Escherichia coli O157:H7 GN=yeaW PE=3 SV=1	iron-sulfur cluster-binding protein, rieske family domain protein	18167969	GO:0019439//aromatic compound catabolic process;GO:0055114//obsolete oxidation-reduction process;	-	GO:0005506//iron ion binding;GO:0051537//2 iron, 2 sulfur cluster binding;GO:0016708//oxidoreductase activity, acting on paired donors, with incorporation or reduction of molecular oxygen, NAD(P)H as one donor, and incorporation of two atoms of oxygen into one donor;	-
CCM_01455	257.353	64.8339	-1.98893	0.0145885	0.272917	NW_006271969.1	-	-	sordNOG04038	S	sp|P39992|YEC3_YEAST Uncharacterized protein YEL023C OS=Saccharomyces cerevisiae (strain ATCC 204508 / S288c) GN=YEL023C PE=4 SV=1	peptidoglycan binding domain containing protein	18163486	-	-	-	-
CCM_02165	163.56	66.5552	-1.2972	0.0146596	0.273181	NW_006271970.1	GO:0016874;GO:0006464;GO:0016740	K03800	sordNOG09885	H	sp|O13629|LPLA_SCHPO Putative lipoate-protein ligase A OS=Schizosaccharomyces pombe (strain 972 / ATCC 24843) GN=aim22 PE=3 SV=1	lipoate-protein ligase A, putative	18164193	GO:0006464//cellular protein modification process;	-	GO:0016874//ligase activity;GO:0016740//transferase activity;	ko00785(Lipoic acid metabolism)
CCM_01405	364.071	167.117	-1.12336	0.0155162	0.285318	NW_006271969.1	GO:0016021	K07297	sordNOG10161;opiNOG03657;onyNOG02488	T	sp|Q94177|ADRL_CAEEL Progestin and adipoQ receptor-like protein 1 OS=Caenorhabditis elegans GN=paqr-1 PE=3 SV=2	Hly-III related protein	18163436	-	GO:0016021//integral component of membrane;	-	ko04936(Alcoholic liver disease);ko04932(Non-alcoholic fatty liver disease);ko04920(Adipocytokine signaling pathway);ko04211(Longevity regulating pathway);ko04152(AMPK signaling pathway)
CCM_01765	402.062	149.316	-1.42904	0.0155648	0.285318	NW_006271969.1	GO:0004497;GO:0055114;GO:0071949	-	opiNOG46730;necNOG09789;sorNOG06360	S	sp|A8LVF4|KMO_SALAI Kynurenine 3-monooxygenase OS=Salinispora arenicola (strain CNS-205) GN=kmo PE=3 SV=1	monooxygenase, putative	18163795	GO:0055114//obsolete oxidation-reduction process;	-	GO:0004497//monooxygenase activity;GO:0071949//FAD binding;	-
CCM_02297	154.206	69.1364	-1.15735	0.0158778	0.288052	NW_006271970.1	GO:0008270;GO:0004126;GO:0009972	K01489	opiNOG37478	F	sp|P32320|CDD_HUMAN Cytidine deaminase OS=Homo sapiens GN=CDA PE=1 SV=2	mitochondrial ornithine carrier protein AmcA/Ort1, putative	18164324	GO:0009972//cytidine deamination;	-	GO:0008270//zinc ion binding;GO:0004126//cytidine deaminase activity;	ko00983(Drug metabolism - other enzymes);ko00240(Pyrimidine metabolism)
CCM_09083	159.305	69.3325	-1.20018	0.0160575	0.28885	NW_006271975.1	GO:0016021;GO:0031919;GO:0031924;GO:0055085;GO:0005886	-	sordNOG11749	S	sp|P53099|TPN1_YEAST Vitamin B6 transporter TPN1 OS=Saccharomyces cerevisiae (strain ATCC 204508 / S288c) GN=TPN1 PE=1 SV=1	nucleoside transporter, putative	18171086	GO:0031919//vitamin B6 transport;GO:0055085//transmembrane transport;	GO:0016021//integral component of membrane;GO:0005886//plasma membrane;	GO:0031924//vitamin B6 transmembrane transporter activity;	-
CCM_08587	1683.44	735.569	-1.19448	0.0160723	0.28885	NW_006271975.1	GO:0008168;GO:0009236;GO:0032259	-	hypNOG10477	S	-	hypothetical protein	18170593	GO:0009236//cobalamin biosynthetic process;GO:0032259//methylation;	-	GO:0008168//methyltransferase activity;	-
CCM_09638	243.4	48.3739	-2.33103	0.0163313	0.291111	NW_006271978.1	-	-	opiNOG39720;necNOG08020;hypNOG12006;sordNOG13017;hypNOG12846	RS	-	malate dehydrogenase	18171640	-	-	-	-
CCM_05636	403.033	145.09	-1.47395	0.0165031	0.292215	NW_006271972.1	GO:0000981;GO:0005634;GO:0006357;GO:0008270	-	pleNOG06428;opiNOG46349	S	sp|O74308|YOG2_SCHPO Uncharacterized transcriptional regulatory protein C15D4.02 OS=Schizosaccharomyces pombe (strain 972 / ATCC 24843) GN=SPBC15D4.02 PE=3 SV=3	C6 zinc finger domain protein	18167654	GO:0006357//regulation of transcription by RNA polymerase II;	GO:0005634//nucleus;	GO:0000981//DNA-binding transcription factor activity, RNA polymerase II-specific;GO:0008270//zinc ion binding;	-
CCM_04995	355.153	72.5034	-2.29232	0.0167891	0.295643	NW_006271971.1	GO:0046872;GO:0055114;GO:0016491	-	opiNOG21760;sordNOG07303	Q	sp|P32021|EFE_PSESH 2-oxoglutarate-dependent ethylene/succinate-forming enzyme OS=Pseudomonas savastanoi pv. phaseolicola GN=efe PE=1 SV=1	2-oxoglutarate-dependent ethylene/succinate-forming enzyme	18167015	GO:0055114//obsolete oxidation-reduction process;	-	GO:0046872//metal ion binding;GO:0016491//oxidoreductase activity;	-
CCM_03160	1127.27	503.714	-1.16216	0.0169054	0.296159	NW_006271970.1	GO:0004190;GO:0006508	-	sordNOG04158	O	sp|D4AIS3|OPSB_ARTBC Probable aspartic-type endopeptidase OPSB OS=Arthroderma benhamiae (strain ATCC MYA-4681 / CBS 112371) GN=OPSB PE=3 SV=1	candidapepsin-4 precursor	18165187	GO:0006508//proteolysis;	-	GO:0004190//aspartic-type endopeptidase activity;	-
CCM_08458	78.2832	37.6229	-1.05709	0.016911	0.296159	NW_006271975.1	-	-	sordNOG12202;opiNOG41403;necNOG07583	S	-	hypothetical protein	18170465	-	-	-	-
CCM_06482	121.434	41.542	-1.54753	0.0174135	0.299833	NW_006271973.1	-	-	sordNOG08115	R	sp|Q9FCD7|TAP_STRCO Tripeptidyl aminopeptidase OS=Streptomyces coelicolor (strain ATCC BAA-471 / A3(2) / M145) GN=tap PE=3 SV=1	proteinase, putative	18168496	-	-	-	-
CCM_02562	34868.7	17279	-1.01291	0.0176237	0.302026	NW_006271970.1	GO:0006508;GO:0004252	K01279	opiNOG14582;opiNOG17772	O	sp|Q70GH4|SED3_ASPFU Tripeptidyl-peptidase sed3 OS=Neosartorya fumigata (strain ATCC MYA-4609 / Af293 / CBS 101355 / FGSC A1100) GN=sed3 PE=1 SV=1	tripeptidyl peptidase	18164589	GO:0006508//proteolysis;	-	GO:0004252//serine-type endopeptidase activity;	ko04142(Lysosome)
CCM_07093	75.9962	36.3533	-1.06384	0.0181732	0.306495	NW_006271973.1	GO:0016787	-	opiNOG19662;sordNOG10911	S	sp|P14300|DRAG_RHORU ADP-ribosyl-[dinitrogen reductase] glycohydrolase OS=Rhodospirillum rubrum GN=draG PE=1 SV=1	ADP-ribosylglycohydrolase family protein	18169104	-	-	GO:0016787//hydrolase activity;	-
CCM_06988	1803.62	644.516	-1.48461	0.0182305	0.306495	NW_006271973.1	GO:0008483;GO:0009058;GO:0030170	K00838	sordNOG11379	E	sp|O14192|AATR1_SCHPO Aromatic amino acid aminotransferase C56E4.03 OS=Schizosaccharomyces pombe (strain 972 / ATCC 24843) GN=SPAC56E4.03 PE=3 SV=1	L-kynurenine/alpha-aminoadipate aminotransferase, putative	18168999	GO:0009058//biosynthetic process;	-	GO:0008483//transaminase activity;GO:0030170//pyridoxal phosphate binding;	ko00960(Tropane, piperidine and pyridine alkaloid biosynthesis);ko00950(Isoquinoline alkaloid biosynthesis);ko00401(Novobiocin biosynthesis);ko00400(Phenylalanine, tyrosine and tryptophan biosynthesis);ko00380(Tryptophan metabolism);ko00360(Phenylalanine metabolism);ko00350(Tyrosine metabolism);ko00300(Lysine biosynthesis);ko00270(Cysteine and methionine metabolism);ko00130(Ubiquinone and other t…
CCM_00504	138.34	56.1631	-1.30052	0.018483	0.308872	NW_006271969.1	GO:0005576;GO:0045735;GO:0030145	-	opiNOG36403;NOG56765	S	sp|P09350|SR1A_PHYPO Spherulin-1A OS=Physarum polycephalum PE=1 SV=1	spherulin-1B precursor	18162539	-	GO:0005576//extracellular region;	GO:0045735//nutrient reservoir activity;GO:0030145//manganese ion binding;	-
CCM_09321	3149.22	1315.2	-1.25971	0.0188445	0.311812	NW_006271976.1	-	-	-	-	-	hypothetical protein	18171324	-	-	-	-
CCM_08964	1775.13	875.558	-1.01965	0.0194396	0.317282	NW_006271975.1	GO:0008483;GO:0006525;GO:0030170	K00818	sorNOG03415;sordNOG04823;opiNOG03792	E	sp|Q9P3I3|ARGD_NEUCR Acetylornithine aminotransferase, mitochondrial OS=Neurospora crassa (strain ATCC 24698 / 74-OR23-1A / CBS 708.71 / DSM 1257 / FGSC 987) GN=arg-8 PE=3 SV=1	acetylornithine aminotransferase	18170968	GO:0006525//arginine metabolic process;	-	GO:0008483//transaminase activity;GO:0030170//pyridoxal phosphate binding;	ko00220(Arginine biosynthesis)
CCM_08014	314.28	5.29808	-5.89044	0.0199593	0.320801	NW_006271974.1	-	-	sorNOG07852;pleNOG08828;sordNOG06515;sorNOG07780;opiNOG27042	Q	sp|Q00278|AFLD_ASPPU Norsolorinic acid ketoreductase OS=Aspergillus parasiticus (strain ATCC 56775 / NRRL 5862 / SRRC 143 / SU-1) GN=aflD PE=1 SV=1	Short-chain dehydrogenase/reductase SDR	18170023	-	-	-	-
CCM_09353	673.473	28.3867	-4.56833	0.020073	0.320801	NW_006271977.1	-	-	sordNOG15295	R	-	hypothetical protein	18171356	-	-	-	-
CCM_01585	62.8474	28.6447	-1.13359	0.0203644	0.323037	NW_006271969.1	-	-	sordNOG13234;opiNOG32026	S	-	hypothetical protein	18163616	-	-	-	-
CCM_04129	212.281	100.616	-1.07712	0.0206444	0.325863	NW_006271971.1	GO:0009055	K03521	opiNOG00480	C	sp|P38117|ETFB_HUMAN Electron transfer flavoprotein subunit beta OS=Homo sapiens GN=ETFB PE=1 SV=3	electron transfer flavoprotein beta-subunit	18166152	-	-	GO:0009055//electron transfer activity;	-
CCM_08990	61.7046	28.1882	-1.13029	0.0207257	0.32642	NW_006271975.1	-	-	sordNOG14676	S	-	hypothetical protein	18170994	-	-	-	-
CCM_00548	32.2906	8.64786	-1.9007	0.0208463	0.32642	NW_006271969.1	-	-	sordNOG04052;opiNOG16822	S	-	hypothetical protein	18162583	-	-	-	-
CCM_07949	530.389	239.165	-1.14904	0.0210267	0.326527	NW_006271974.1	GO:0046872;GO:0005388;GO:0005524;GO:0016021;GO:0070588	K01537	opiNOG01657;pleNOG06875;sordNOG09960	P	sp|Q9HDW7|ATC2_SCHPO Calcium-transporting ATPase 2 OS=Schizosaccharomyces pombe (strain 972 / ATCC 24843) GN=pmc1 PE=3 SV=1	plasma membrane calcium-transporting ATPase 2	18169959	GO:0070588//calcium ion transmembrane transport;	GO:0016021//integral component of membrane;	GO:0046872//metal ion binding;GO:0005388//P-type calcium transporter activity;GO:0005524//ATP binding;	-
CCM_08197	16.6564	3.41251	-2.28718	0.0211333	0.326596	NW_006271974.1	GO:0016021	-	-	-	-	hypothetical protein	18170206	-	GO:0016021//integral component of membrane;	-	-
CCM_00803	55.5109	24.7628	-1.1646	0.021372	0.328946	NW_006271969.1	GO:0000981;GO:0005634;GO:0008270;GO:0006357	-	opiNOG18313;sacNOG05611;opiNOG15410	SK	sp|Q08904|RDR1_YEAST Protein RDR1 OS=Saccharomyces cerevisiae (strain ATCC 204508 / S288c) GN=RDR1 PE=4 SV=1	transcriptional repressor involved in the control of multidrug resistance	18162837	GO:0006357//regulation of transcription by RNA polymerase II;	GO:0005634//nucleus;	GO:0000981//DNA-binding transcription factor activity, RNA polymerase II-specific;GO:0008270//zinc ion binding;	-
CCM_04836	81.8834	39.5619	-1.04946	0.0215895	0.330981	NW_006271971.1	-	-	-	-	-	hypothetical protein	18166857	-	-	-	-
CCM_05950	161.287	65.9244	-1.29074	0.0220924	0.336615	NW_006271972.1	GO:0055114;GO:0016491	K00306	opiNOG26806	R	sp|O43029|FAP1_SCHPO L-pipecolate oxidase OS=Schizosaccharomyces pombe (strain 972 / ATCC 24843) GN=fap1 PE=1 SV=1	sarcosine oxidase, putative	18167968	GO:0055114//obsolete oxidation-reduction process;	-	GO:0016491//oxidoreductase activity;	ko04146(Peroxisome);ko00310(Lysine degradation);ko00260(Glycine, serine and threonine metabolism)
CCM_05408	384.278	167.973	-1.19392	0.0225412	0.339605	NW_006271972.1	-	-	opiNOG65128;sordNOG15097;hypNOG02176	S	-	hypothetical protein	18167426	-	-	-	-
CCM_09229	213.494	85.8954	-1.31354	0.022912	0.34091	NW_006271976.1	-	-	opiNOG35546;sordNOG13311;sorNOG05733	R	-	endo alpha-1,4 polygalactosaminidase	18171232	-	-	-	-
CCM_07555	50.3963	21.5927	-1.22278	0.0229504	0.340952	NW_006271974.1	-	-	opiNOG33821;sordNOG13667	S	-	hypothetical protein	18169566	-	-	-	-
CCM_02110	548.19	188.359	-1.54119	0.023986	0.349838	NW_006271970.1	GO:0005975;GO:0005618;GO:0071555;GO:0004553	-	COG2273;sordNOG11888	RG	sp|Q8J0P4|CRF1_ASPFU Probable glycosidase crf1 OS=Neosartorya fumigata (strain ATCC MYA-4609 / Af293 / CBS 101355 / FGSC A1100) GN=crf1 PE=1 SV=2	extracellular cell wall glucanase Crf1/allergen Asp F9	18164138	GO:0005975//carbohydrate metabolic process;GO:0071555//cell wall organization;	GO:0005618//cell wall;	GO:0004553//hydrolase activity, hydrolyzing O-glycosyl compounds;	-
CCM_09560	143.307	58.6113	-1.28986	0.0246823	0.354705	NW_006271977.1	GO:0016717;GO:0006629;GO:0055114;GO:0016021	K22993	sordNOG08040;sorNOG01302	I	sp|A3F5L3|DES2_SORBI Fatty acid desaturase DES2 OS=Sorghum bicolor GN=DES2 PE=2 SV=1	Fatty acid desaturase, type 1	18171562	GO:0006629//lipid metabolic process;GO:0055114//obsolete oxidation-reduction process;	GO:0016021//integral component of membrane;	GO:0016717//oxidoreductase activity, acting on paired donors, with oxidation of a pair of donors resulting in the reduction of molecular oxygen to two molecules of water;	ko01040(Biosynthesis of unsaturated fatty acids)
CCM_00620	1455.5	360.322	-2.01416	0.0246874	0.354705	NW_006271969.1	GO:0016740;GO:0016491;GO:0055114	-	opiNOG31715	R	sp|P39623|SPSC_BACSU Spore coat polysaccharide biosynthesis protein SpsC OS=Bacillus subtilis (strain 168) GN=spsC PE=3 SV=1	Pyridoxal phosphate-dependent transferase, major region	18162655	GO:0055114//obsolete oxidation-reduction process;	-	GO:0016740//transferase activity;GO:0016491//oxidoreductase activity;	-
CCM_03034	62.4429	29.0058	-1.10619	0.0251659	0.358334	NW_006271970.1	-	K17362	sordNOG13348;sorNOG05376;opiNOG43109	RS	sp|Q9CQR4|ACO13_MOUSE Acyl-coenzyme A thioesterase 13 OS=Mus musculus GN=Acot13 PE=1 SV=1	thioesterase family protein, putative	18165061	-	-	-	-
CCM_07945	472.904	167.837	-1.49448	0.0252669	0.358708	NW_006271974.1	GO:0030061;GO:0005216;GO:0097002;GO:0033615;GO:0034220;GO:0032977;GO:0000002;GO:0016021;GO:0097177;GO:0045039;GO:0032979	K03217	COG0706;opiNOG02980;sordNOG15641	OU	sp|P39952|OXA1_YEAST Mitochondrial inner membrane protein OXA1 OS=Saccharomyces cerevisiae (strain ATCC 204508 / S288c) GN=OXA1 PE=1 SV=1	mitochondrial export translocase Oxa1, putative	18169955	GO:0033615//mitochondrial proton-transporting ATP synthase complex assembly;GO:0034220//ion transmembrane transport;GO:0000002//mitochondrial genome maintenance;GO:0045039//protein insertion into mitochondrial inner membrane;GO:0032979//protein insertion into mitochondrial inner membrane from matrix;	GO:0030061//mitochondrial crista;GO:0097002//mitochondrial inner boundary membrane;GO:0016021//integral component of membrane;	GO:0005216//ion channel activity;GO:0032977//membrane insertase activity;GO:0097177//mitochondrial ribosome binding;	ko03070(Bacterial secretion system);ko03060(Protein export);ko02024(Quorum sensing)
CCM_06210	48.2141	16.354	-1.55981	0.0256112	0.360313	NW_006271972.1	GO:0016021;GO:0055085	-	opiNOG03553;sordNOG10482	R	sp|A0A0B5EMG9|FUB11_FUSOX Efflux pump FUBT OS=Fusarium oxysporum GN=FUBT PE=1 SV=1	MFS multidrug transporter, putative	18168225	GO:0055085//transmembrane transport;	GO:0016021//integral component of membrane;	-	-
CCM_00450	57.3964	17.7283	-1.6949	0.0259586	0.362421	NW_006271969.1	-	-	opiNOG25300;agarNOG06923	S	-	phosphatidylcholine-hydrolyzing phospholipase C	18162485	-	-	-	-
CCM_06802	4791.37	2099.77	-1.19021	0.026369	0.364267	NW_006271973.1	-	-	-	-	-	hypothetical protein	18168813	-	-	-	-
CCM_05414	937.568	267.898	-1.80724	0.0267496	0.366738	NW_006271972.1	-	-	hypNOG05371;necNOG08713;hypNOG08390	S	-	hypothetical protein	18167432	-	-	-	-
CCM_06507	262.437	102.9	-1.35072	0.0275598	0.374103	NW_006271973.1	GO:0016021	-	-	-	-	hypothetical protein	18168521	-	GO:0016021//integral component of membrane;	-	-
CCM_05328	166.943	78.6125	-1.08652	0.0276491	0.374785	NW_006271972.1	GO:0055114;GO:0016491	-	sordNOG05370	R	sp|Q9LES4|L2HDH_ARATH L-2-hydroxyglutarate dehydrogenase, mitochondrial OS=Arabidopsis thaliana GN=L2HGDH PE=1 SV=1	L-2-hydroxyglutarate dehydrogenase	18167346	GO:0055114//obsolete oxidation-reduction process;	-	GO:0016491//oxidoreductase activity;	-
CCM_08221	1633.36	135.79	-3.5884	0.0279691	0.377345	NW_006271974.1	GO:0016042;GO:0004806	-	eurotNOG00414;opiNOG01243	R	sp|D4AX63|LIPA_ARTBC Lipase A OS=Arthroderma benhamiae (strain ATCC MYA-4681 / CBS 112371) GN=ARB_00790 PE=3 SV=1	secretory lipase, putative	18170229	GO:0016042//lipid catabolic process;	-	GO:0004806//triglyceride lipase activity;	-
CCM_06869	387.147	53.9674	-2.84272	0.0285822	0.379395	NW_006271973.1	GO:0016021;GO:0006798;GO:0000298;GO:0000329;GO:0005634;GO:0004309	K06018	sordNOG07890;opiNOG02001	I	sp|Q9P3S1|PPN1_NEUCR Endopolyphosphatase OS=Neurospora crassa (strain ATCC 24698 / 74-OR23-1A / CBS 708.71 / DSM 1257 / FGSC 987) GN=epp-1 PE=3 SV=3	endopolyphosphatase	18168880	GO:0006798//polyphosphate catabolic process;	GO:0016021//integral component of membrane;GO:0000329//fungal-type vacuole membrane;GO:0005634//nucleus;	GO:0000298//endopolyphosphatase activity;GO:0004309//exopolyphosphatase activity;	-
CCM_06832	409.646	150.512	-1.4445	0.0287235	0.379612	NW_006271973.1	GO:0016301;GO:0005524;GO:0016310	-	sordNOG13471;magNOG06581	SR	-	ATP-binding protein (P-loop)	18168843	GO:0016310//phosphorylation;	-	GO:0016301//kinase activity;GO:0005524//ATP binding;	-
CCM_02745	39.6417	16.1013	-1.29984	0.0288747	0.379612	NW_006271970.1	-	-	-	-	-	hypothetical protein	18164772	-	-	-	-
CCM_08011	154.127	17.178	-3.16549	0.0292379	0.382804	NW_006271974.1	GO:0055085;GO:0016021	K22134	sordNOG05255;opiNOG03023	R	sp|E9R876|GLIA_ASPFU MFS gliotoxin efflux transporter gliA OS=Neosartorya fumigata (strain ATCC MYA-4609 / Af293 / CBS 101355 / FGSC A1100) GN=gliA PE=2 SV=1	MFS multidrug transporter	18170020	GO:0055085//transmembrane transport;	GO:0016021//integral component of membrane;	-	-
CCM_05419	1344.45	308.085	-2.12562	0.0293281	0.383463	NW_006271972.1	GO:0008237;GO:0006508	-	opiNOG11422;sorNOG03848	WO	sp|Q871C5|MEP1_NEUCR Extracellular metalloprotease NCU07200 OS=Neurospora crassa (strain ATCC 24698 / 74-OR23-1A / CBS 708.71 / DSM 1257 / FGSC 987) GN=B8G12.220 PE=3 SV=1	metalloprotease 1	18167437	GO:0006508//proteolysis;	-	GO:0008237//metallopeptidase activity;	-
CCM_04221	37.9048	15.4715	-1.29277	0.0294107	0.383903	NW_006271971.1	-	-	-	-	-	hypothetical protein	18166244	-	-	-	-
CCM_01248	37.5317	8.05891	-2.21945	0.0299309	0.388697	NW_006271969.1	-	-	NOG05350	S	-	necrosis-inducing protein	18163279	-	-	-	-
CCM_03653	39.3122	15.9907	-1.29774	0.0301582	0.389017	NW_006271971.1	-	-	eurotNOG03541;opiNOG53463;necNOG08193	R	sp|D4ALG0|LYSM1_ARTBC LysM domain-containing protein ARB_05157 OS=Arthroderma benhamiae (strain ATCC MYA-4681 / CBS 112371) GN=ARB_05157 PE=1 SV=1	LysM domain protein, putative	18165679	-	-	-	-
CCM_07909	225.274	35.9465	-2.64776	0.0302543	0.389115	NW_006271974.1	GO:0016787;GO:0006629	-	sordNOG04289;opiNOG43850	IG	sp|O59952|LIP_THELA Lipase OS=Thermomyces lanuginosus GN=LIP PE=1 SV=1	lipase precursor	18169919	GO:0006629//lipid metabolic process;	-	GO:0016787//hydrolase activity;	-
CCM_01507	474.766	226.684	-1.06654	0.0302874	0.389115	NW_006271969.1	GO:0055114;GO:0016491	-	opiNOG06007	C	sp|Q55CD9|NDH_DICDI Probable NADH dehydrogenase OS=Dictyostelium discoideum GN=DDB_G0270104 PE=3 SV=2	pyridine nucleotide-disulfide oxidoreductase, putative	18163538	GO:0055114//obsolete oxidation-reduction process;	-	GO:0016491//oxidoreductase activity;	-
CCM_05301	71.8155	35.7094	-1.00799	0.0312318	0.395424	NW_006271972.1	GO:0000981;GO:0005634;GO:0008270;GO:0003677;GO:0006357	-	opiNOG16598;sordNOG09251;sorNOG02651	S	sp|P28349|NIT4_NEUCR Nitrogen assimilation transcription factor nit-4 OS=Neurospora crassa (strain ATCC 24698 / 74-OR23-1A / CBS 708.71 / DSM 1257 / FGSC 987) GN=nit-4 PE=4 SV=2	pathway-specific nitrogen regulator	18167319	GO:0006357//regulation of transcription by RNA polymerase II;	GO:0005634//nucleus;	GO:0000981//DNA-binding transcription factor activity, RNA polymerase II-specific;GO:0008270//zinc ion binding;GO:0003677//DNA binding;	-
CCM_05164	321.073	150.45	-1.09362	0.0315303	0.396361	NW_006271972.1	GO:0008660;GO:0030170;GO:0009310	K01505	sordNOG10385	S	sp|Q5KMX3|1A1D_CRYNJ Probable 1-aminocyclopropane-1-carboxylate deaminase OS=Cryptococcus neoformans var. neoformans serotype D (strain JEC21 / ATCC MYA-565) GN=CNB00190 PE=3 SV=1	1-aminocyclopropane-1-carboxylate deaminase, putative	18167183	GO:0009310//amine catabolic process;	-	GO:0008660//1-aminocyclopropane-1-carboxylate deaminase activity;GO:0030170//pyridoxal phosphate binding;	ko00270(Cysteine and methionine metabolism)
CCM_05978	1174.52	504.659	-1.2187	0.0332135	0.407088	NW_006271972.1	GO:0016491;GO:0055114	K22745	opiNOG04665	R	sp|A1A653|FER8_USTMA Fe-regulated protein 8 OS=Ustilago maydis (strain 521 / FGSC 9021) GN=fer8 PE=2 SV=1	mercuric reductase, putative	18167996	GO:0055114//obsolete oxidation-reduction process;	-	GO:0016491//oxidoreductase activity;	ko04115(p53 signaling pathway)
CCM_07911	113.878	55.1582	-1.04584	0.034438	0.413654	NW_006271974.1	GO:0006412;GO:0005840;GO:0003735	K02914	sorNOG05962;sordNOG15297	J	-	hypothetical protein	18169921	GO:0006412//translation;	GO:0005840//ribosome;	GO:0003735//structural constituent of ribosome;	ko03010(Ribosome)
CCM_00547	288.579	141.262	-1.0306	0.034575	0.413654	NW_006271969.1	GO:0016021	-	NOG105407;sordNOG12215;opiNOG37592;sorNOG05146	S	sp|Q54ZG7|TM234_DICDI Transmembrane protein 234 homolog OS=Dictyostelium discoideum GN=DDB_G0277575 PE=3 SV=1	integral membrane protein	18162582	-	GO:0016021//integral component of membrane;	-	-
CCM_06994	996.853	468.393	-1.08966	0.0350211	0.416429	NW_006271973.1	GO:0008152;GO:0003824	-	KOG1680;COG1024;opiNOG55035;opiNOG12902;NOG13867	RI	sp|A4YI89|HPCD_METS5 3-hydroxypropionyl-coenzyme A dehydratase OS=Metallosphaera sedula (strain ATCC 51363 / DSM 5348 / JCM 9185 / NBRC 15509 / TH2) GN=Msed_2001 PE=1 SV=1	enoyl-CoA hydratase, putative	18169005	GO:0008152//metabolic process;	-	GO:0003824//catalytic activity;	-
CCM_00027	29.3623	7.56521	-1.95651	0.0354435	0.420459	NW_006271969.1	-	-	opiNOG41254;sordNOG14152	S	-	hypothetical protein	18162062	-	-	-	-
CCM_02126	767.594	345.593	-1.15127	0.0355493	0.420674	NW_006271970.1	GO:0004519;GO:0090305;GO:0004527	-	opiNOG40885;sordNOG04311	R	-	hypothetical protein	18164154	GO:0090305//nucleic acid phosphodiester bond hydrolysis;	-	GO:0004519//endonuclease activity;GO:0004527//exonuclease activity;	-
CCM_04307	200.779	90.7122	-1.14624	0.0357433	0.421785	NW_006271971.1	GO:0006508;GO:0004252	-	sorNOG02631;opiNOG15058;sordNOG05970	O	sp|Q68GV9|ALP_LECPS Alkaline serine protease ver112 OS=Lecanicillium psalliotae PE=1 SV=1	oryzin precursor	18166330	GO:0006508//proteolysis;	-	GO:0004252//serine-type endopeptidase activity;	-
CCM_02445	28.2125	10.0142	-1.49429	0.035857	0.421785	NW_006271970.1	-	-	opiNOG58722;hypNOG13264;sordNOG13296;opiNOG63510	S	-	hypothetical protein	18164472	-	-	-	-
CCM_05293	507.653	178.912	-1.50459	0.03612	0.423749	NW_006271972.1	GO:0003995;GO:0050660;GO:0055114	K00249	pleNOG03416;KOG0141;opiNOG18070;sordNOG06804;sorNOG06386	I	sp|P9WQG2|ACDC_MYCTO Acyl-CoA dehydrogenase fadE12 OS=Mycobacterium tuberculosis (strain CDC 1551 / Oshkosh) GN=fadE12 PE=3 SV=1	acyl-CoA dehydrogenase, putative	18167311	GO:0055114//obsolete oxidation-reduction process;	-	GO:0003995//acyl-CoA dehydrogenase activity;GO:0050660//flavin adenine dinucleotide binding;	ko04936(Alcoholic liver disease);ko03320(PPAR signaling pathway);ko00280(Valine, leucine and isoleucine degradation);ko00071(Fatty acid degradation)
CCM_04867	285.003	59.8284	-2.25207	0.0365126	0.424741	NW_006271971.1	GO:0016021	-	sordNOG11262	S	-	hypothetical protein	18166888	-	GO:0016021//integral component of membrane;	-	-
CCM_03400	59.9728	29.1244	-1.04208	0.0372772	0.430295	NW_006271970.1	-	-	opiNOG27535	Q	sp|Q7Z9I2|YCP9_SCHPO Uncharacterized oxidoreductase C663.09c OS=Schizosaccharomyces pombe (strain 972 / ATCC 24843) GN=SPCC663.09c PE=3 SV=1	Short-chain dehydrogenase/reductase SDR	18165426	-	-	-	-
CCM_06617	12.8283	2.31504	-2.47023	0.0373599	0.430295	NW_006271973.1	GO:0016021;GO:0055085	-	opiNOG51434;pleNOG01857;KOG0255;opiNOG12768	R	sp|A0A0E4AZP4|FSA7_FUSSF MFS transporter fsa7 OS=Fusarium sp. (strain FN080326) GN=fsa7 PE=3 SV=1	multidrug transporter	18168631	GO:0055085//transmembrane transport;	GO:0016021//integral component of membrane;	-	-
CCM_00183	205.924	97.887	-1.07292	0.037486	0.430723	NW_006271969.1	GO:0016853;GO:0005737;GO:0009072	K01800	opiNOG09837	E	sp|O43123|MAAI_EMENI Maleylacetoacetate isomerase OS=Emericella nidulans (strain FGSC A4 / ATCC 38163 / CBS 112.46 / NRRL 194 / M139) GN=maiA PE=1 SV=1	maleylacetoacetate isomerase MaiA	18162218	GO:0009072//aromatic amino acid family metabolic process;	GO:0005737//cytoplasm;	GO:0016853//isomerase activity;	ko00643(Styrene degradation);ko00350(Tyrosine metabolism)
CCM_02316	351.076	150.118	-1.22568	0.0392066	0.440416	NW_006271970.1	GO:0042407;GO:0044284;GO:0061617	K17786	sordNOG06037;sordNOG08600	S	sp|P50087|MIC26_YEAST MICOS subunit MIC26 OS=Saccharomyces cerevisiae (strain ATCC 204508 / S288c) GN=MIC26 PE=1 SV=1	mitochondrial protein, putative	18164343	GO:0042407//cristae formation;	GO:0044284//mitochondrial crista junction;GO:0061617//MICOS complex;	-	-
CCM_06852	69.9701	26.8574	-1.38142	0.0401056	0.444721	NW_006271973.1	-	-	-	-	-	hypothetical protein	18168863	-	-	-	-
CCM_01942	358.46	168.562	-1.08853	0.0406257	0.446604	NW_006271970.1	GO:0016491;GO:0008270;GO:0055114	-	sordNOG10195;opiNOG06785	CQ	sp|P54006|TOXD_COCCA Protein TOXD OS=Cochliobolus carbonum GN=TOXD PE=3 SV=1	alcohol dehydrogenase, putative	18163971	GO:0055114//obsolete oxidation-reduction process;	-	GO:0016491//oxidoreductase activity;GO:0008270//zinc ion binding;	-
CCM_04046	217.624	75.6354	-1.52471	0.040779	0.447265	NW_006271971.1	GO:0010181;GO:0055114;GO:0016491	K07005	sordNOG10060	S	-	FMN-binding split barrel	18166069	GO:0055114//obsolete oxidation-reduction process;	-	GO:0010181//FMN binding;GO:0016491//oxidoreductase activity;	-
CCM_00046	55.9561	27.4164	-1.02926	0.0408548	0.447584	NW_006271969.1	GO:0005524	-	sorNOG01842;COG0464;sordNOG06480;opiNOG02983	LO	sp|Q04540|CBXXP_CUPNH Protein CbxX, plasmid OS=Cupriavidus necator (strain ATCC 17699 / H16 / DSM 428 / Stanier 337) GN=cbxXP PE=3 SV=1	AAA family ATPase, putative	18162081	-	-	GO:0005524//ATP binding;	-
CCM_02677	44.6014	20.9045	-1.09328	0.0412377	0.449941	NW_006271970.1	GO:0008270;GO:0006357;GO:0005634;GO:0000981	-	NOG200718	R	-	Fungal transcriptional regulatory protein	18164704	GO:0006357//regulation of transcription by RNA polymerase II;	GO:0005634//nucleus;	GO:0008270//zinc ion binding;GO:0000981//DNA-binding transcription factor activity, RNA polymerase II-specific;	-
CCM_09602	104754	47827.2	-1.1311	0.0414587	0.450599	NW_006271978.1	-	-	opiNOG11011	S	-	hypothetical protein	18171604	-	-	-	-
CCM_05705	73.7084	33.0059	-1.15911	0.0419815	0.454454	NW_006271972.1	GO:0016021	-	eurotNOG00929;opiNOG23998	S	-	Regulator of G protein signaling superfamily	18167723	-	GO:0016021//integral component of membrane;	-	-
CCM_08073	24.7737	7.81226	-1.66499	0.0422216	0.454454	NW_006271974.1	GO:0016021;GO:0005215;GO:0055085	-	sordNOG09533;KOG0254;opiNOG17948	R	sp|S0EEY7|FUS6_GIBF5 Efflux pump FUS6 OS=Gibberella fujikuroi (strain CBS 195.34 / IMI 58289 / NRRL A-6831) GN=FUS6 PE=2 SV=1	Major facilitator superfamily transporter	18170082	GO:0055085//transmembrane transport;	GO:0016021//integral component of membrane;	GO:0005215//transporter activity;	-
CCM_00457	397.544	189.759	-1.06694	0.0429223	0.457187	NW_006271969.1	-	-	sordNOG13983;opiNOG35422	RS	-	hypothetical protein	18162492	-	-	-	-
CCM_06775	103.187	40.1887	-1.36039	0.0434432	0.458191	NW_006271973.1	GO:0016787	-	necNOG12973;hypNOG06759	S	-	NUDIX domain protein	18168787	-	-	GO:0016787//hydrolase activity;	-
CCM_00714	60.5907	2.27084	-4.7378	0.0437962	0.458856	NW_006271969.1	-	-	opiNOG59818;sordNOG13766;opiNOG56370;magNOG04093	R	sp|P19463|CON13_NEUCR Conidiation-specific protein 13 OS=Neurospora crassa (strain ATCC 24698 / 74-OR23-1A / CBS 708.71 / DSM 1257 / FGSC 987) GN=con-13 PE=2 SV=1	conidiation-specific protein, putative	18162748	-	-	-	-
CCM_09029	76.5749	27.914	-1.45588	0.0440431	0.459927	NW_006271975.1	GO:0016884;GO:0016740	K09117	opiNOG33497;sordNOG14079	S	sp|B2WMX8|AIM41_PYRTR Altered inheritance of mitochondria protein 41, mitochondrial OS=Pyrenophora tritici-repentis (strain Pt-1C-BFP) GN=AIM41 PE=3 SV=1	Aspartyl/glutamyl-tRNA amidotransferase subunit B, putative	18171033	-	-	GO:0016884//carbon-nitrogen ligase activity, with glutamine as amido-N-donor;GO:0016740//transferase activity;	-
CCM_09334	49.4359	20.9604	-1.2379	0.0440991	0.459927	NW_006271976.1	GO:0003676;GO:0046983;GO:0007165	-	sordNOG07053;opiNOG75098;hypNOG14053;opiNOG73954	LS	-	HAT dimerization	18171337	GO:0007165//signal transduction;	-	GO:0003676//nucleic acid binding;GO:0046983//protein dimerization activity;	-
CCM_02081	150.162	35.4511	-2.08262	0.0450056	0.464065	NW_006271970.1	-	-	-	-	-	hypothetical protein	18164110	-	-	-	-
CCM_06148	710.795	309.353	-1.20018	0.0451832	0.464065	NW_006271972.1	-	-	-	-	-	hypothetical protein	18168163	-	-	-	-
CCM_03031	33.6448	14.0376	-1.26109	0.0451922	0.464065	NW_006271970.1	GO:0016021	-	sorNOG04997;sordNOG13391	S	-	YhhN family protein	18165058	-	GO:0016021//integral component of membrane;	-	-
CCM_02520	261.362	92.8187	-1.49356	0.0455066	0.465594	NW_006271970.1	GO:0008236;GO:0006508	-	sorNOG06803;opiNOG18413;sordNOG05440	R	sp|B8NM69|USTP_ASPFN Peptidase S41 family protein ustP OS=Aspergillus flavus (strain ATCC 200026 / FGSC A1120 / NRRL 3357 / JCM 12722 / SRRC 167) GN=ustP PE=1 SV=1	pyridine nucleotide-disulfide oxidoreductase family protein	18164547	GO:0006508//proteolysis;	-	GO:0008236//serine-type peptidase activity;	-
CCM_09010	34.0503	8.98879	-1.92147	0.0458642	0.466063	NW_006271975.1	-	-	sordNOG12558;opiNOG31555	S	-	NAD(P)-binding domain	18171014	-	-	-	-
CCM_07063	368.991	71.3166	-2.37128	0.0458778	0.466063	NW_006271973.1	GO:0016787;GO:0008152	-	sorNOG08018;opiNOG46636	SR	-	isochorismatase hydrolase	18169074	GO:0008152//metabolic process;	-	GO:0016787//hydrolase activity;	-
CCM_08918	1655.36	242.987	-2.76819	0.0461647	0.467325	NW_006271975.1	GO:0008289;GO:0006810;GO:0005215	K08752	-	-	sp|Q9U5P1|FABP_LEPDS Fatty acid-binding protein OS=Lepidoglyphus destructor PE=1 SV=1	cellular retinoic acid binding protein	18170923	GO:0006810//transport;	-	GO:0008289//lipid binding;GO:0005215//transporter activity;	ko03320(PPAR signaling pathway)
CCM_06045	30550.1	12988.6	-1.23393	0.0464769	0.468528	NW_006271972.1	GO:0055085;GO:0016021	-	sordNOG05921;sorNOG00625;opiNOG52830	T	sp|P40900|ISP4_SCHPO Sexual differentiation process protein isp4 OS=Schizosaccharomyces pombe (strain 972 / ATCC 24843) GN=isp4 PE=2 SV=2	Tetrapeptide transporter, OPT1/isp4	18168062	GO:0055085//transmembrane transport;	GO:0016021//integral component of membrane;	-	-
CCM_04376	29.0001	10.8987	-1.41191	0.0471158	0.471904	NW_006271971.1	GO:0016310;GO:0016301	-	opiNOG30364;sorNOG07742	R	-	Protein kinase-like domain	18166399	GO:0016310//phosphorylation;	-	GO:0016301//kinase activity;	-
CCM_08304	347.221	134.932	-1.36362	0.0475301	0.473672	NW_006271975.1	GO:0016021;GO:0055085	-	COG0477;opiNOG49354;opiNOG48896	G	sp|A0A089FNE5|PRLL_FUNXX MFS transporter prlL OS=Fungal sp. (strain NRRL 50135) GN=prlL PE=3 SV=1	pantothenate transporter, putative	18170312	GO:0055085//transmembrane transport;	GO:0016021//integral component of membrane;	-	-
CCM_07863	31.0781	12.8052	-1.27917	0.0490636	0.481456	NW_006271974.1	GO:0055114;GO:0016491;GO:0008270	-	sordNOG11654	Q	sp|A1CFL1|PATD_ASPCL Alcohol dehydrogenase patD OS=Aspergillus clavatus (strain ATCC 1007 / CBS 513.65 / DSM 816 / NCTC 3887 / NRRL 1) GN=patD PE=1 SV=1	alcohol dehydrogenase	18169873	GO:0055114//obsolete oxidation-reduction process;	-	GO:0016491//oxidoreductase activity;GO:0008270//zinc ion binding;	-
CCM_01579	427.703	212.828	-1.00692	0.0499181	0.484393	NW_006271969.1	GO:0005739;GO:0003994;GO:0046872;GO:0005634;GO:0051539;GO:0006099	K17450	sordNOG08915	C	sp|Q4WJ90|ACON2_ASPFU Putative aconitate hydratase, mitochondrial OS=Neosartorya fumigata (strain ATCC MYA-4609 / Af293 / CBS 101355 / FGSC A1100) GN=acoB PE=2 SV=1	aconitate hydratase	18163610	GO:0006099//tricarboxylic acid cycle;	GO:0005739//mitochondrion;GO:0005634//nucleus;	GO:0003994//aconitate hydratase activity;GO:0046872//metal ion binding;GO:0051539//4 iron, 4 sulfur cluster binding;	ko00300(Lysine biosynthesis)
CCM_02053	5086.44	60199.4	3.56502	7.91969e-30	2.53351e-26	NW_006271970.1	-	-	-	-	-	hypothetical protein	18164082	-	-	-	-
CCM_07708	9228.93	57291.6	2.63409	1.77299e-21	3.40308e-18	NW_006271974.1	-	-	-	-	-	hypothetical protein	18169718	-	-	-	-
CCM_07562	6.19288	115.77	4.22451	4.18507e-15	5.02051e-12	NW_006271974.1	-	-	-	-	-	hypothetical protein	18169573	-	-	-	-
CCM_00853	1169.97	5115.08	2.12828	1.16865e-14	1.01959e-11	NW_006271969.1	-	-	NOG00044;eurotNOG05566;sordNOG07556	VS	-	hypothetical protein	18162887	-	-	-	-
CCM_01862	1442.18	5625.83	1.96381	9.81721e-13	7.24737e-10	NW_006271969.1	-	-	opiNOG47914;opiNOG66321;sordNOG14802	R	sp|Q4WLB9|CFMA_ASPFU GPI-anchored CFEM domain protein A OS=Neosartorya fumigata (strain ATCC MYA-4609 / Af293 / CBS 101355 / FGSC A1100) GN=cfmA PE=1 SV=1	CFEM domain protein	18163891	-	-	-	-
CCM_06119	5104.02	37565.2	2.87969	1.18533e-11	8.12545e-09	NW_006271972.1	-	-	-	-	-	hypothetical protein	18168134	-	-	-	-
CCM_01379	346.512	1121.55	1.69452	1.5375e-09	8.19745e-07	NW_006271969.1	GO:0016021;GO:0034067;GO:0008270;GO:0044695;GO:0016567;GO:0016874;GO:0043162;GO:0005794;GO:0016485;GO:0061630;GO:0005783	K23788	sordNOG09447	O	sp|P36096|TUL1_YEAST Transmembrane E3 ubiquitin-protein ligase 1 OS=Saccharomyces cerevisiae (strain ATCC 204508 / S288c) GN=TUL1 PE=1 SV=1	RING finger ubiquitin ligase, putative	18163410	GO:0034067//protein localization to Golgi apparatus;GO:0016567//protein ubiquitination;GO:0043162//ubiquitin-dependent protein catabolic process via the multivesicular body sorting pathway;GO:0016485//protein processing;	GO:0016021//integral component of membrane;GO:0044695//Dsc E3 ubiquitin ligase complex;GO:0005794//Golgi apparatus;GO:0005783//endoplasmic reticulum;	GO:0008270//zinc ion binding;GO:0016874//ligase activity;GO:0061630//ubiquitin protein ligase activity;	-
CCM_00834	302.754	1020.15	1.75256	2.2113e-09	1.11694e-06	NW_006271969.1	-	-	opiNOG33303;treNOG09656	S	-	hypothetical protein	18162868	-	-	-	-
CCM_07703	434.79	1394.12	1.68097	4.19969e-09	2.01522e-06	NW_006271974.1	GO:0006508;GO:0004222;GO:0046872	K13726	opiNOG14332;opiNOG23877	O	sp|P25375|PRTD_YEAST Saccharolysin OS=Saccharomyces cerevisiae (strain ATCC 204508 / S288c) GN=PRD1 PE=1 SV=1	metallopeptidase MepB	18169713	GO:0006508//proteolysis;	-	GO:0004222//metalloendopeptidase activity;GO:0046872//metal ion binding;	-
CCM_02741	632.103	1970.28	1.64017	7.34987e-09	3.20621e-06	NW_006271970.1	-	-	hypNOG06251;opiNOG22413	S	-	hypothetical protein	18164768	-	-	-	-
CCM_09193	5014.12	23659.1	2.23833	2.30997e-08	9.23699e-06	NW_006271976.1	GO:0005634;GO:0051082;GO:0005832;GO:0006457;GO:0005524	K09495	opiNOG02081;sordNOG09218	O	sp|O74341|TCPG_SCHPO T-complex protein 1 subunit gamma OS=Schizosaccharomyces pombe (strain 972 / ATCC 24843) GN=cct3 PE=1 SV=1	T-complex protein 1 subunit gamma	18171196	GO:0006457//protein folding;	GO:0005634//nucleus;GO:0005832//chaperonin-containing T-complex;	GO:0051082//unfolded protein binding;GO:0005524//ATP binding;	-
CCM_01380	199.469	619.837	1.63572	4.02716e-08	1.48649e-05	NW_006271969.1	GO:0006357;GO:0008270;GO:0000981;GO:0005634	-	sorNOG00419;opiNOG35089;sordNOG05294	S	-	mercuric reductase, putative	18163411	GO:0006357//regulation of transcription by RNA polymerase II;	GO:0005634//nucleus;	GO:0008270//zinc ion binding;GO:0000981//DNA-binding transcription factor activity, RNA polymerase II-specific;	-
CCM_06295	4534.99	12019.8	1.40624	1.29277e-07	4.00217e-05	NW_006271972.1	GO:0071949;GO:0055114;GO:0004497	-	sordNOG11960;opiNOG19219	S	sp|P15245|PHHY_TRICU Phenol hydroxylase OS=Trichosporon cutaneum PE=1 SV=3	phenol 2-monooxygenase	18168310	GO:0055114//obsolete oxidation-reduction process;	-	GO:0071949//FAD binding;GO:0004497//monooxygenase activity;	-
CCM_04140	417.623	1440.32	1.78612	1.48798e-07	4.46254e-05	NW_006271971.1	-	-	opiNOG32841;sordNOG04689	S	-	hypothetical protein	18166163	-	-	-	-
CCM_08211	241.162	688.824	1.51414	4.10081e-07	0.000114961	NW_006271974.1	GO:0055114;GO:0016491;GO:0071949	K00480	sordNOG09357;opiNOG00334	CR	sp|B6D1N4|HPXO_KLEPN FAD-dependent urate hydroxylase OS=Klebsiella pneumoniae GN=hpxO PE=3 SV=1	salicylate hydroxylase, putative	18170219	GO:0055114//obsolete oxidation-reduction process;	-	GO:0016491//oxidoreductase activity;GO:0071949//FAD binding;	ko00626(Naphthalene degradation);ko00624(Polycyclic aromatic hydrocarbon degradation);ko00621(Dioxin degradation)
CCM_04517	3320.62	8540.18	1.36281	4.9045e-07	0.000130746	NW_006271971.1	-	K20062	sordNOG04964	R	sp|B8N4G0|CRED_ASPFN Probable HECT-type ubiquitin ligase-interacting protein creD OS=Aspergillus flavus (strain ATCC 200026 / FGSC A1120 / NRRL 3357 / JCM 12722 / SRRC 167) GN=creD PE=3 SV=1	carbon catabolite repression protein CreD, putative	18166540	-	-	-	-
CCM_06585	2235.53	5550.13	1.31191	1.12321e-06	0.000276396	NW_006271973.1	GO:0055085;GO:0016021	-	sordNOG11150;saccNOG00546	T	sp|Q06593|OPT2_YEAST Oligopeptide transporter 2 OS=Saccharomyces cerevisiae (strain ATCC 204508 / S288c) GN=OPT2 PE=1 SV=1	oligopeptide transporter	18168599	GO:0055085//transmembrane transport;	GO:0016021//integral component of membrane;	-	-
CCM_08921	151.81	501.812	1.72488	1.87068e-06	0.000427451	NW_006271975.1	GO:0016884	K01426	COG0154;sorNOG07359;sordNOG08113;sordNOG07417	J	sp|Q9URY4|YI01_SCHPO Putative amidase C869.01 OS=Schizosaccharomyces pombe (strain 972 / ATCC 24843) GN=SPAC869.01 PE=3 SV=1	amidase, putative	18170926	-	-	GO:0016884//carbon-nitrogen ligase activity, with glutamine as amido-N-donor;	ko00643(Styrene degradation);ko00627(Aminobenzoate degradation);ko00380(Tryptophan metabolism);ko00360(Phenylalanine metabolism);ko00330(Arginine and proline metabolism)
CCM_04849	2227.79	5277.92	1.24436	3.65835e-06	0.000730604	NW_006271971.1	GO:0003676;GO:0046872	-	opiNOG31485	R	sp|B0YDH7|MTFA_ASPFC C2H2 finger domain transcription factor mtfA OS=Neosartorya fumigata (strain CEA10 / CBS 144.89 / FGSC A1163) GN=mtfA PE=4 SV=1	hypothetical protein	18166870	-	-	GO:0003676//nucleic acid binding;GO:0046872//metal ion binding;	-
CCM_00567	27.9404	112.355	2.00764	3.73029e-06	0.000730604	NW_006271969.1	-	-	-	-	-	hypothetical protein	18162602	-	-	-	-
CCM_06012	1527.91	3616.83	1.24317	4.5183e-06	0.000867243	NW_006271972.1	GO:0004674;GO:0006468;GO:0003746;GO:0005524;GO:0006414	-	sordNOG09344;opiNOG16306	RD	sp|Q6B9X6|VWKA_DICDI Alpha-protein kinase vwkA OS=Dictyostelium discoideum GN=vwkA PE=1 SV=1	eukaroytic elongation factor 2 kinase	18168030	GO:0006468//protein phosphorylation;GO:0006414//translational elongation;	-	GO:0004674//protein serine/threonine kinase activity;GO:0003746//translation elongation factor activity;GO:0005524//ATP binding;	-
CCM_01567	1580.63	3658.53	1.21076	5.43398e-06	0.000983961	NW_006271969.1	-	-	hypNOG02587	S	-	hypothetical protein	18163598	-	-	-	-
CCM_09403	3095.81	7028.19	1.18284	5.91785e-06	0.00105173	NW_006271977.1	GO:0016021	-	sordNOG14330	S	-	hypothetical protein	18171406	-	GO:0016021//integral component of membrane;	-	-
CCM_00299	200.169	721.931	1.85065	7.46862e-06	0.00125748	NW_006271969.1	-	-	-	-	-	Gurmarin-like inhibitors/Antifungal toxin	18162334	-	-	-	-
CCM_07260	7965.02	17948.9	1.17214	7.80752e-06	0.00129188	NW_006271973.1	-	-	-	-	-	hypothetical protein	18169271	-	-	-	-
CCM_08437	3483.38	7849.21	1.17206	1.19956e-05	0.00185681	NW_006271975.1	GO:0006950;GO:0016021	-	hypNOG05719;sordNOG13197	S	-	hypothetical protein	18170445	GO:0006950//response to stress;	GO:0016021//integral component of membrane;	-	-
CCM_03688	136.647	515.352	1.9151	1.29263e-05	0.0019691	NW_006271971.1	GO:0055114;GO:0051213;GO:0020037	K00463	sordNOG10116;opiNOG17428;sordNOG09647	EHR	sp|P14902|I23O1_HUMAN Indoleamine 2,3-dioxygenase 1 OS=Homo sapiens GN=IDO1 PE=1 SV=1	indoleamine 2,3-dioxygenase family protein	18165712	GO:0055114//obsolete oxidation-reduction process;	-	GO:0051213//dioxygenase activity;GO:0020037//heme binding;	ko05143(African trypanosomiasis);ko00380(Tryptophan metabolism)
CCM_00215	632.402	1466.66	1.21362	1.34876e-05	0.0019914	NW_006271969.1	GO:0009277;GO:0016740;GO:0005975;GO:0005886;GO:0031225	K22834	sordNOG08814	R	sp|B0Y8H9|GEL2_ASPFC 1,3-beta-glucanosyltransferase gel2 OS=Neosartorya fumigata (strain CEA10 / CBS 144.89 / FGSC A1163) GN=gel2 PE=1 SV=1	1,3-beta-glucanosyltransferase Gel2	18162250	GO:0005975//carbohydrate metabolic process;	GO:0009277//fungal-type cell wall;GO:0005886//plasma membrane;GO:0031225//anchored component of membrane;	GO:0016740//transferase activity;	-
CCM_00274	1323.72	5310.5	2.00425	1.37129e-05	0.00199399	NW_006271969.1	GO:0016021;GO:0055085	-	pleNOG06526;sorNOG06507;opiNOG00469	G	sp|Q9P6J0|YHDC_SCHPO Uncharacterized transporter C1683.12 OS=Schizosaccharomyces pombe (strain 972 / ATCC 24843) GN=SPBC1683.12 PE=3 SV=1	pantothenate transporter liz1	18162309	GO:0055085//transmembrane transport;	GO:0016021//integral component of membrane;	-	-
CCM_01826	190.725	480.786	1.3339	1.97686e-05	0.00278999	NW_006271969.1	-	-	hypNOG02500;sorNOG06243;sordNOG14268	S	-	hypothetical protein	18163856	-	-	-	-
CCM_07693	122.673	308.851	1.33209	2.41503e-05	0.00320518	NW_006271974.1	GO:0051213;GO:0055114	-	opiNOG54889;COG5285	QS	sp|D4AU26|SWNH1_ARTBC Dioxygenase swnH1 OS=Arthroderma benhamiae (strain ATCC MYA-4681 / CBS 112371) GN=swnH1 PE=3 SV=1	phytanoyl-CoA dioxygenase	18169703	GO:0055114//obsolete oxidation-reduction process;	-	GO:0051213//dioxygenase activity;	-
CCM_09351	10692	31682.3	1.56714	2.96514e-05	0.00366756	NW_006271977.1	-	-	sordNOG08545;opiNOG08970	TO	sp|Q9UQK1|PPR3C_HUMAN Protein phosphatase 1 regulatory subunit 3C OS=Homo sapiens GN=PPP1R3C PE=1 SV=2	protein phosphatase regulator	18171354	-	-	-	-
CCM_07089	101.614	264.504	1.38019	2.98082e-05	0.00366756	NW_006271973.1	GO:0016021	-	opiNOG56399;sordNOG08260	S	-	hypothetical protein	18169100	-	GO:0016021//integral component of membrane;	-	-
CCM_00725	1554.26	3442.37	1.14717	3.51404e-05	0.00416348	NW_006271969.1	GO:0016787	-	sordNOG08680;sorNOG04018	R	sp|Q9SR79|PPA16_ARATH Probable inactive purple acid phosphatase 16 OS=Arabidopsis thaliana GN=PAP16 PE=2 SV=1	Metallophosphoesterase	18162759	-	-	GO:0016787//hydrolase activity;	-
CCM_05542	482.965	1394.45	1.5297	3.72104e-05	0.00430251	NW_006271972.1	-	-	chaNOG05731;hypNOG08259;sordNOG07994	S	-	hypothetical protein	18167560	-	-	-	-
CCM_09199	205.38	504.917	1.29775	3.95654e-05	0.00452035	NW_006271976.1	GO:0009088;GO:0004072;GO:0016310;GO:0009089	K00928	opiNOG03785;sordNOG08577	E	sp|W7MS01|FUB3_GIBM7 Aspartate kinase FUB3 OS=Gibberella moniliformis (strain M3125 / FGSC 7600) GN=FUB3 PE=1 SV=1	aspartokinase	18171202	GO:0009088//threonine biosynthetic process;GO:0016310//phosphorylation;GO:0009089//lysine biosynthetic process via diaminopimelate;	-	GO:0004072//aspartate kinase activity;	ko00300(Lysine biosynthesis);ko00270(Cysteine and methionine metabolism);ko00261(Monobactam biosynthesis);ko00260(Glycine, serine and threonine metabolism)
CCM_02383	3859.67	23701.5	2.61843	4.59727e-05	0.00507126	NW_006271970.1	-	-	sorNOG00076;opiNOG11519;sordNOG10516	R	sp|D4AUF1|WSCD1_ARTBC WSC domain-containing protein ARB_07867 OS=Arthroderma benhamiae (strain ATCC MYA-4681 / CBS 112371) GN=ARB_07867 PE=1 SV=1	WSC domain protein	18164410	-	-	-	-
CCM_01229	2356.94	4903.34	1.05685	6.70498e-05	0.0068455	NW_006271969.1	-	-	sordNOG06765	S	-	hypothetical protein	18163261	-	-	-	-
CCM_06304	6705.64	13686	1.02925	7.15736e-05	0.00723044	NW_006271972.1	-	-	sordNOG13412;sordNOG12421	S	-	hypothetical protein	18168319	-	-	-	-
CCM_06613	1032.4	2318.37	1.16711	7.33012e-05	0.00729113	NW_006271973.1	-	K01735	sordNOG08654;opiNOG12273	E	sp|Q3M6C3|DDGS_ANAVT Demethyl-4-deoxygadusol synthase OS=Anabaena variabilis (strain ATCC 29413 / PCC 7937) GN=Ava_3858 PE=1 SV=1	2-epi-5-epi-valiolone synthase	18168627	-	-	-	ko00400(Phenylalanine, tyrosine and tryptophan biosynthesis)
CCM_07365	4722.32	9520.52	1.01155	0.000101943	0.00949848	NW_006271974.1	-	-	sordNOG04429	S	sp|Q04608|YD124_YEAST Uncharacterized protein YDR124W OS=Saccharomyces cerevisiae (strain ATCC 204508 / S288c) GN=YDR124W PE=1 SV=1	kinesin, putative	18169376	-	-	-	-
CCM_05548	1675.9	3419.41	1.02881	0.00010688	0.00981674	NW_006271972.1	-	-	onyNOG06402;COG0666;sordNOG07082	MR	sp|P53356|HTK16_HYDVU Tyrosine-protein kinase HTK16 OS=Hydra vulgaris GN=HTK16 PE=2 SV=1	ankyrin 2,3/unc44	18167566	-	-	-	-
CCM_02065	11420.4	45515.7	1.99475	0.000107404	0.00981674	NW_006271970.1	GO:0003840;GO:0006749	K00681	opiNOG05473;COG0405	E	sp|B8NM71|USTH_ASPFN Glutathione hydrolase OS=Aspergillus flavus (strain ATCC 200026 / FGSC A1120 / NRRL 3357 / JCM 12722 / SRRC 167) GN=ustH PE=3 SV=1	gamma-glutamyltranspeptidase	18164094	GO:0006749//glutathione metabolic process;	-	GO:0003840//obsolete gamma-glutamyltransferase activity;	ko00480(Glutathione metabolism);ko00460(Cyanoamino acid metabolism);ko00430(Taurine and hypotaurine metabolism)
CCM_09345	88.7268	228.723	1.36616	0.000113492	0.0102753	NW_006271977.1	GO:0055114;GO:0016491;GO:0008270	-	opiNOG24487;COG0604;opiNOG17019;opiNOG50218	QC	sp|Q8J0F9|MLCG_PENCI Deshydrogenase mlcG OS=Penicillium citrinum GN=mlcG PE=1 SV=1	alcohol dehydrogenase, putative	18171348	GO:0055114//obsolete oxidation-reduction process;	-	GO:0016491//oxidoreductase activity;GO:0008270//zinc ion binding;	-
CCM_04871	1980.61	4268.74	1.10787	0.000127703	0.0112383	NW_006271971.1	GO:0005576	-	sordNOG12260	S	sp|D4B327|PRY1_ARTBC Probable pathogenesis-related protein ARB_02861 OS=Arthroderma benhamiae (strain ATCC MYA-4681 / CBS 112371) GN=ARB_02861 PE=3 SV=2	SCP-like extracellular protein, putative	18166892	-	GO:0005576//extracellular region;	-	-
CCM_02795	531.532	1125.62	1.0825	0.000154871	0.0125958	NW_006271970.1	GO:0004499;GO:0050661;GO:0055114;GO:0050660	K03379	opiNOG03405;opiNOG54376	Q	sp|P12015|CHMO_ACISP Cyclohexanone 1,2-monooxygenase OS=Acinetobacter sp. PE=1 SV=2	NAD(P)-binding domain	18164822	GO:0055114//obsolete oxidation-reduction process;	-	GO:0004499//N,N-dimethylaniline monooxygenase activity;GO:0050661//NADP binding;GO:0050660//flavin adenine dinucleotide binding;	ko00930(Caprolactam degradation)
CCM_03272	539.884	1137.74	1.07545	0.000158707	0.0127993	NW_006271970.1	GO:0008138;GO:0035335;GO:0004725	-	sordNOG13910;opiNOG39347	V	sp|Q9BY84|DUS16_HUMAN Dual specificity protein phosphatase 16 OS=Homo sapiens GN=DUSP16 PE=1 SV=1	Dual specificity phosphatase	18165298	GO:0035335//peptidyl-tyrosine dephosphorylation;	-	GO:0008138//protein tyrosine/serine/threonine phosphatase activity;GO:0004725//protein tyrosine phosphatase activity;	-
CCM_01568	966.253	1962.32	1.02209	0.000167647	0.0134076	NW_006271969.1	-	-	hypNOG12610;sordNOG13276	S	-	hypothetical protein	18163599	-	-	-	-
CCM_08479	192.313	499.376	1.37667	0.00022753	0.0178984	NW_006271975.1	-	-	opiNOG42592	R	-	muramidase, putative	18170486	-	-	-	-
CCM_02585	3153.91	7692.74	1.28636	0.000270288	0.0205869	NW_006271970.1	GO:0008289	-	opiNOG10888	S	sp|Q10327|YD72_SCHPO Uncharacterized protein C32A11.02c OS=Schizosaccharomyces pombe (strain 972 / ATCC 24843) GN=SPAC32A11.02c PE=4 SV=1	hypothetical protein	18164612	-	-	GO:0008289//lipid binding;	-
CCM_08316	570.695	1143.57	1.00275	0.000288165	0.0212732	NW_006271975.1	GO:0004396;GO:0006096;GO:0005524;GO:0046835;GO:0005623;GO:0005536;GO:0001678	K00844	opiNOG48748;COG5026	G	sp|Q92407|HXKG_ASPNG Glucokinase OS=Aspergillus niger GN=glkA PE=1 SV=1	glucokinase	18170324	GO:0006096//glycolytic process;GO:0046835//carbohydrate phosphorylation;GO:0001678//cellular glucose homeostasis;	GO:0005623//obsolete cell;	GO:0004396//hexokinase activity;GO:0005524//ATP binding;GO:0005536//glucose binding;	ko05230(Central carbon metabolism in cancer);ko05131(Shigellosis);ko04973(Carbohydrate digestion and absorption);ko04930(Type II diabetes mellitus);ko04910(Insulin signaling pathway);ko04066(HIF-1 signaling pathway);ko00524(Neomycin, kanamycin and gentamicin biosynthesis);ko00521(Streptomycin biosynthesis);ko00520(Amino sugar and nucleotide sugar metabolism);ko00500(Starch and sucrose metabolism)…
CCM_05230	62.8668	160.346	1.35082	0.000300323	0.0220015	NW_006271972.1	-	-	magNOG12220;opiNOG57457	S	-	hypothetical protein	18167249	-	-	-	-
CCM_08209	545.911	1491.31	1.44984	0.000331941	0.0237734	NW_006271974.1	GO:0016787	K14333	sordNOG09944;opiNOG06913	R	sp|P80402|DBD23_ASPOR 2,3-dihydroxybenzoate decarboxylase OS=Aspergillus oryzae (strain ATCC 42149 / RIB 40) GN=AO090005000447 PE=1 SV=2	amidohydrolase family protein	18170217	-	-	GO:0016787//hydrolase activity;	ko00627(Aminobenzoate degradation);ko00362(Benzoate degradation)
CCM_05138	444.559	892.167	1.00494	0.000346163	0.0244697	NW_006271972.1	-	-	opiNOG35933;opiNOG43719;sordNOG13952	SR	sp|Q8U308|RIDA_PYRFU 2-iminobutanoate/2-iminopropanoate deaminase OS=Pyrococcus furiosus (strain ATCC 43587 / DSM 3638 / JCM 8422 / Vc1) GN=yjgF PE=1 SV=1	L-PSP endoribonuclease family protein, putative	18167158	-	-	-	-
CCM_09373	1441.92	4166.68	1.53091	0.000349419	0.0244697	NW_006271977.1	-	-	opiNOG36175;sordNOG13204	R	-	expression library immunization antigen 1	18171376	-	-	-	-
CCM_09341	244.643	519.762	1.08717	0.000353158	0.0244697	NW_006271977.1	GO:0008152;GO:0003824	-	COG1020;opiNOG50366;opiNOG14230	IQ	sp|Q4WR82|NRPS2_ASPFU Nonribosomal peptide synthetase 2 OS=Neosartorya fumigata (strain ATCC MYA-4609 / Af293 / CBS 101355 / FGSC A1100) GN=NRPS2 PE=2 SV=1	NRPS-like enzyme, putative	18171344	GO:0008152//metabolic process;	-	GO:0003824//catalytic activity;	-
CCM_02444	202.71	553.558	1.44932	0.000353714	0.0244697	NW_006271970.1	GO:0016301;GO:0016310	-	sordNOG09645;hypNOG13366;opiNOG51239	S	-	serine/threonine-protein kinase Sgk2	18164471	GO:0016310//phosphorylation;	-	GO:0016301//kinase activity;	-
CCM_01917	2377.7	6478.23	1.44603	0.00040347	0.0269673	NW_006271969.1	GO:0005634;GO:0043565;GO:0006355	-	sordNOG06453;opiNOG06186	K	sp|Q99160|HOY1_YARLI Homeobox protein HOY1 OS=Yarrowia lipolytica (strain CLIB 122 / E 150) GN=HOY1 PE=3 SV=2	homeoprotein	18163946	GO:0006355//regulation of transcription, DNA-templated;	GO:0005634//nucleus;	GO:0043565//sequence-specific DNA binding;	-
CCM_07694	345.389	1031.7	1.57873	0.000421399	0.0275113	NW_006271974.1	GO:0006357;GO:0008270;GO:0005634;GO:0000981	-	opiNOG58805;necNOG12649	S	-	Fungal transcriptional regulatory protein	18169704	GO:0006357//regulation of transcription by RNA polymerase II;	GO:0005634//nucleus;	GO:0008270//zinc ion binding;GO:0000981//DNA-binding transcription factor activity, RNA polymerase II-specific;	-
CCM_01492	3508.43	10275.6	1.55032	0.000424564	0.0275307	NW_006271969.1	-	-	opiNOG39069;sorNOG05872;sordNOG13034	R	sp|D4B0F8|TLP1_ARTBC Antigenic thaumatin-like protein ARB_01932 OS=Arthroderma benhamiae (strain ATCC MYA-4681 / CBS 112371) GN=ARB_01932 PE=1 SV=2	BYS1 domain-containing protein	18163523	-	-	-	-
CCM_00439	120.474	266.778	1.14692	0.000465965	0.0288508	NW_006271969.1	GO:0008270;GO:0008641;GO:0005829;GO:0005634	K10639	sordNOG14128	O	sp|D3Z3K2|CIP1_MOUSE E3 ubiquitin-protein ligase CCNB1IP1 OS=Mus musculus GN=Ccnb1ip1 PE=1 SV=1	hypothetical protein	18162474	-	GO:0005829//cytosol;GO:0005634//nucleus;	GO:0008270//zinc ion binding;GO:0008641//ubiquitin-like modifier activating enzyme activity;	-
CCM_05310	22.7754	74.0129	1.7003	0.000497306	0.030399	NW_006271972.1	GO:0008199;GO:0055114;GO:0006725;GO:0016702	-	sordNOG05693;sordNOG10081;sorNOG00418	R	-	extracellular dioxygenase, putative	18167328	GO:0055114//obsolete oxidation-reduction process;GO:0006725//cellular aromatic compound metabolic process;	-	GO:0008199//ferric iron binding;GO:0016702//oxidoreductase activity, acting on single donors with incorporation of molecular oxygen, incorporation of two atoms of oxygen;	-
CCM_02063	5623.05	32384.3	2.52587	0.000578763	0.0340164	NW_006271970.1	GO:0016740	-	opiNOG41198;sordNOG08976;sorNOG08418	R	sp|B8NM78|USTM_ASPFN Methyltransferase ustM OS=Aspergillus flavus (strain ATCC 200026 / FGSC A1120 / NRRL 3357 / JCM 12722 / SRRC 167) GN=ustM PE=1 SV=2	hypothetical protein	18164092	-	-	GO:0016740//transferase activity;	-
CCM_07200	100.702	227.657	1.17678	0.00058623	0.0340164	NW_006271973.1	-	-	onyNOG01226;eurotNOG10687;opiNOG18078	S	-	hypothetical protein	18169211	-	-	-	-
CCM_07695	134.691	289.785	1.10533	0.000587335	0.0340164	NW_006271974.1	GO:0055114;GO:0016491	-	opiNOG12864;COG1028	IQ	sp|Q9WYG0|Y325_THEMA Uncharacterized oxidoreductase TM_0325 OS=Thermotoga maritima (strain ATCC 43589 / MSB8 / DSM 3109 / JCM 10099) GN=TM_0325 PE=3 SV=1	tropinone reductase, putative	18169705	GO:0055114//obsolete oxidation-reduction process;	-	GO:0016491//oxidoreductase activity;	-
CCM_02051	149.991	362.347	1.27249	0.000896262	0.0467469	NW_006271970.1	GO:0004631;GO:0009116;GO:0016614;GO:0055114;GO:0050660;GO:0016310;GO:0005737;GO:0006695	-	opiNOG02355;COG0503;sordNOG07603	FR	sp|Q54H55|Y8969_DICDI FAD-linked oxidoreductase DDB_G0289697 OS=Dictyostelium discoideum GN=DDB_G0289697 PE=2 SV=1	phosphoribosyl transferase	18164080	GO:0009116//nucleoside metabolic process;GO:0055114//obsolete oxidation-reduction process;GO:0016310//phosphorylation;GO:0006695//cholesterol biosynthetic process;	GO:0005737//cytoplasm;	GO:0004631//phosphomevalonate kinase activity;GO:0016614//oxidoreductase activity, acting on CH-OH group of donors;GO:0050660//flavin adenine dinucleotide binding;	-
CCM_06115	95.1612	208.903	1.13439	0.00107358	0.0520359	NW_006271972.1	GO:0016301;GO:0016310	-	opiNOG21763	S	-	Protein kinase-like domain	18168130	GO:0016310//phosphorylation;	-	GO:0016301//kinase activity;	-
CCM_04956	1452.19	3543.62	1.28699	0.00116946	0.0558373	NW_006271971.1	-	-	opiNOG30910	S	-	hypothetical protein	18166976	-	-	-	-
CCM_07381	15.9059	53.7466	1.75661	0.00122505	0.0570871	NW_006271974.1	GO:0005524;GO:0004637;GO:0046872;GO:0009113	-	opiNOG55254;COG0151;opiNOG00079	F	sp|P20772|PUR2_SCHPO Bifunctional purine biosynthetic protein ADE1 OS=Schizosaccharomyces pombe (strain 972 / ATCC 24843) GN=ade1 PE=3 SV=1	phosphoribosylamine-glycine ligase	18169392	GO:0009113//purine nucleobase biosynthetic process;	-	GO:0005524//ATP binding;GO:0004637//phosphoribosylamine-glycine ligase activity;GO:0046872//metal ion binding;	-
CCM_06121	64.6705	150.531	1.21888	0.00123119	0.0570871	NW_006271972.1	-	-	-	-	-	hypothetical protein	18168136	-	-	-	-
CCM_06911	215.996	1108.39	2.3594	0.00123538	0.0570871	NW_006271973.1	GO:0015171;GO:0016021;GO:0003333	K16261	opiNOG05794;NOG27385;onyNOG01044	EU	sp|P18696|PUTX_EMENI Proline-specific permease OS=Emericella nidulans (strain FGSC A4 / ATCC 38163 / CBS 112.46 / NRRL 194 / M139) GN=prnB PE=2 SV=2	proline permease PrnB	18168922	GO:0003333//amino acid transmembrane transport;	GO:0016021//integral component of membrane;	GO:0015171//amino acid transmembrane transporter activity;	-
CCM_01955	3144.78	23001.9	2.87072	0.00129949	0.0596709	NW_006271970.1	-	-	opiNOG64098	S	-	hypothetical protein	18163984	-	-	-	-
CCM_03273	113.095	239.585	1.083	0.00138852	0.0626105	NW_006271970.1	-	-	-	-	-	hypothetical protein	18165299	-	-	-	-
CCM_04023	72.4733	162.652	1.16627	0.00173292	0.0723078	NW_006271971.1	-	-	-	-	-	hypothetical protein	18166046	-	-	-	-
CCM_02061	1962.05	12776.7	2.70307	0.00199405	0.0804071	NW_006271970.1	GO:0055114;GO:0004497;GO:0005506;GO:0020037;GO:0016705	-	KOG0157;opiNOG19202;COG2124;sordNOG11746	Q	sp|B8NM64|USTC_ASPFN Cytochrome P450 monooxygenase ustC OS=Aspergillus flavus (strain ATCC 200026 / FGSC A1120 / NRRL 3357 / JCM 12722 / SRRC 167) GN=ustC PE=1 SV=1	Cytochrome P450	18164090	GO:0055114//obsolete oxidation-reduction process;	-	GO:0004497//monooxygenase activity;GO:0005506//iron ion binding;GO:0020037//heme binding;GO:0016705//oxidoreductase activity, acting on paired donors, with incorporation or reduction of molecular oxygen;	-
CCM_04848	18.8663	57.5291	1.60848	0.00216944	0.0848428	NW_006271971.1	-	-	-	-	-	hypothetical protein	18166869	-	-	-	-
CCM_02056	2063.39	12889.5	2.64311	0.00224708	0.0872167	NW_006271970.1	GO:0004499;GO:0050661;GO:0050660;GO:0055114	-	opiNOG11408;COG2072	PQ	sp|B8NM73|USTF2_ASPFN Flavin-containing monooxygenase ustF2 OS=Aspergillus flavus (strain ATCC 200026 / FGSC A1120 / NRRL 3357 / JCM 12722 / SRRC 167) GN=ustF2 PE=1 SV=1	dimethylaniline monooxygenase, putative	18164085	GO:0055114//obsolete oxidation-reduction process;	-	GO:0004499//N,N-dimethylaniline monooxygenase activity;GO:0050661//NADP binding;GO:0050660//flavin adenine dinucleotide binding;	-
CCM_02054	1194	6461.75	2.43613	0.00250187	0.0932569	NW_006271970.1	GO:0055114;GO:0010181;GO:0016491;GO:0016021	-	opiNOG30976	S	sp|B8NM62|USTO_ASPFN Pyridoxamine 5&apos;-phosphate oxidase family protein ustO OS=Aspergillus flavus (strain ATCC 200026 / FGSC A1120 / NRRL 3357 / JCM 12722 / SRRC 167) GN=ustO PE=3 SV=1	pyridoxamine phosphate oxidase family protein	18164083	GO:0055114//obsolete oxidation-reduction process;	GO:0016021//integral component of membrane;	GO:0010181//FMN binding;GO:0016491//oxidoreductase activity;	-
CCM_02865	223.919	486.489	1.11943	0.00261213	0.0956037	NW_006271970.1	GO:0055085;GO:0016021	-	opiNOG19443;sordNOG08944	R	sp|Q2U5H8|KOJT_ASPOR Probable efflux pump kojT OS=Aspergillus oryzae (strain ATCC 42149 / RIB 40) GN=kojT PE=1 SV=1	MFS multidrug transporter, putative	18164892	GO:0055085//transmembrane transport;	GO:0016021//integral component of membrane;	-	-
CCM_02057	6271.88	30781	2.29507	0.00293381	0.103896	NW_006271970.1	GO:0055114;GO:0050660;GO:0050661;GO:0004499	-	opiNOG11408;COG2072	QP	sp|B8NM73|USTF2_ASPFN Flavin-containing monooxygenase ustF2 OS=Aspergillus flavus (strain ATCC 200026 / FGSC A1120 / NRRL 3357 / JCM 12722 / SRRC 167) GN=ustF2 PE=1 SV=1	FAD dependent oxidoreductase	18164086	GO:0055114//obsolete oxidation-reduction process;	-	GO:0050660//flavin adenine dinucleotide binding;GO:0050661//NADP binding;GO:0004499//N,N-dimethylaniline monooxygenase activity;	-
CCM_06731	923.41	2002.95	1.11709	0.00303447	0.105514	NW_006271973.1	-	-	opiNOG55198;sordNOG13094;opiNOG64258;opiNOG64081	KS	-	bZIP transcription factor	18168745	-	-	-	-
CCM_02055	1690.95	9292.1	2.45817	0.00310634	0.107236	NW_006271970.1	GO:0008483	-	opiNOG54081;COG3320;COG0520	QEI	sp|B8NM72|USTD_ASPFN Cysteine desulfurase-like protein ustD OS=Aspergillus flavus (strain ATCC 200026 / FGSC A1120 / NRRL 3357 / JCM 12722 / SRRC 167) GN=ustD PE=1 SV=1	NRPS-like enzyme, putative	18164084	-	-	GO:0008483//transaminase activity;	-
CCM_02064	1751.36	7038.36	2.00676	0.00345742	0.114884	NW_006271970.1	GO:0016740	-	NOG51395;opiNOG46945	OS	sp|B8NM79|USTS_ASPFN Glutathione S-transferase-like protein ustS OS=Aspergillus flavus (strain ATCC 200026 / FGSC A1120 / NRRL 3357 / JCM 12722 / SRRC 167) GN=ustS PE=1 SV=2	glutathione S-transferase, putative	18164093	-	-	GO:0016740//transferase activity;	-
CCM_09390	1895.33	4281.95	1.17582	0.00357718	0.117569	NW_006271977.1	GO:0055085;GO:0005524;GO:0016021;GO:0042626	K05665	opiNOG11164	Q	sp|Q8J2Q1|FUM19_GIBM7 ABC transporter FUM19 OS=Gibberella moniliformis (strain M3125 / FGSC 7600) GN=FUM19 PE=2 SV=1	ABC multidrug transporter, putative	18171393	GO:0055085//transmembrane transport;	GO:0016021//integral component of membrane;	GO:0005524//ATP binding;GO:0042626//ATPase-coupled transmembrane transporter activity;	ko05206(MicroRNAs in cancer);ko04977(Vitamin digestion and absorption);ko04071(Sphingolipid signaling pathway);ko02010(ABC transporters);ko01523(Antifolate resistance)
CCM_05322	866.683	2243.23	1.372	0.0039017	0.123925	NW_006271972.1	GO:0009086;GO:0003871;GO:0008270;GO:0032259	-	opiNOG15956	S	sp|P42318|YXJG_BACSU Uncharacterized protein YxjG OS=Bacillus subtilis (strain 168) GN=yxjG PE=4 SV=3	Methionine synthase, vitamin-B12 independent, putative	18167340	GO:0009086//methionine biosynthetic process;GO:0032259//methylation;	-	GO:0003871//5-methyltetrahydropteroyltriglutamate-homocysteine S-methyltransferase activity;GO:0008270//zinc ion binding;	-
CCM_02052	55.9209	119.465	1.09512	0.0041118	0.126073	NW_006271970.1	GO:0016810;GO:0055085;GO:0016021	-	sordNOG12238;sorNOG07277;NOG147903	SR	-	alpha/beta hydrolase fold-1	18164081	GO:0055085//transmembrane transport;	GO:0016021//integral component of membrane;	GO:0016810//hydrolase activity, acting on carbon-nitrogen (but not peptide) bonds;	-
CCM_00871	150687	427132	1.50312	0.00444192	0.134469	NW_006271969.1	-	-	-	-	-	hypothetical protein	18162905	-	-	-	-
CCM_06116	1807.33	3635.71	1.00838	0.00445837	0.134469	NW_006271972.1	GO:0035335;GO:0004725;GO:0008138	-	sordNOG13910;opiNOG39347	V	sp|Q9UNI6|DUS12_HUMAN Dual specificity protein phosphatase 12 OS=Homo sapiens GN=DUSP12 PE=1 SV=1	Dual specificity phosphatase, catalytic domain	18168131	GO:0035335//peptidyl-tyrosine dephosphorylation;	-	GO:0004725//protein tyrosine phosphatase activity;GO:0008138//protein tyrosine/serine/threonine phosphatase activity;	-
CCM_02060	7699.82	36102.2	2.22919	0.00447335	0.134469	NW_006271970.1	-	-	opiNOG35974;sorNOG08110	S	sp|B8NM67|USTYA_ASPFN Oxidase ustYa OS=Aspergillus flavus (strain ATCC 200026 / FGSC A1120 / NRRL 3357 / JCM 12722 / SRRC 167) GN=ustYa PE=1 SV=1	hypothetical protein	18164089	-	-	-	-
CCM_04354	954.637	2029.27	1.08794	0.00465041	0.137118	NW_006271971.1	GO:0016705;GO:0055114;GO:0004497	-	opiNOG10215;sordNOG11624;sorNOG01743	S	sp|E9JFX9|DMOA_HYPSL Dimethyl-sulfide monooxygenase OS=Hyphomicrobium sulfonivorans GN=dmoA PE=1 SV=1	dibenzothiophene desulfurization enzyme A	18166377	GO:0055114//obsolete oxidation-reduction process;	-	GO:0016705//oxidoreductase activity, acting on paired donors, with incorporation or reduction of molecular oxygen;GO:0004497//monooxygenase activity;	-
CCM_02059	4457.95	22088	2.30881	0.00568462	0.156319	NW_006271970.1	GO:0016021	-	pleNOG08552;sorNOG08110;pleNOG06351	S	sp|B8NM67|USTYA_ASPFN Oxidase ustYa OS=Aspergillus flavus (strain ATCC 200026 / FGSC A1120 / NRRL 3357 / JCM 12722 / SRRC 167) GN=ustYa PE=1 SV=1	hypothetical protein	18164088	-	GO:0016021//integral component of membrane;	-	-
CCM_04420	68.0762	139.663	1.03672	0.00599129	0.161512	NW_006271971.1	GO:0008152;GO:0016787	-	opiNOG28534;pleNOG03931	R	sp|Q01109|BAH_STRHY Acetyl-hydrolase OS=Streptomyces hygroscopicus GN=bah PE=3 SV=3	alpha/beta hydrolase fold-3 domain containing protein	18166443	GO:0008152//metabolic process;	-	GO:0016787//hydrolase activity;	-
CCM_02058	3251.29	15493.7	2.2526	0.00697786	0.175192	NW_006271970.1	GO:0046872;GO:0055114;GO:0016491;GO:0016021	K00505	opiNOG12374;opiNOG28993	R	sp|B8NM74|USTQ_ASPFN Tyrosinase ustQ OS=Aspergillus flavus (strain ATCC 200026 / FGSC A1120 / NRRL 3357 / JCM 12722 / SRRC 167) GN=ustQ PE=1 SV=1	tyrosinase, putative	18164087	GO:0055114//obsolete oxidation-reduction process;	GO:0016021//integral component of membrane;	GO:0046872//metal ion binding;GO:0016491//oxidoreductase activity;	ko04916(Melanogenesis);ko00965(Betalain biosynthesis);ko00950(Isoquinoline alkaloid biosynthesis);ko00350(Tyrosine metabolism)
CCM_02531	108.252	1714.78	3.98556	0.00703138	0.175192	NW_006271970.1	GO:0005634;GO:0008270;GO:0006351;GO:0003677	-	sordNOG06328	S	sp|D7UQ41|SOL4_ALTSO Probable transcription factor sol4 OS=Alternaria solani GN=sol4 PE=4 SV=1	Fungal specific transcription factor	18164558	GO:0006351//transcription, DNA-templated;	GO:0005634//nucleus;	GO:0008270//zinc ion binding;GO:0003677//DNA binding;	-
CCM_04482	106.623	471.748	2.1455	0.00719242	0.175192	NW_006271971.1	-	-	hypNOG12288;opiNOG36377;sordNOG13187	S	-	hypothetical protein	18166505	-	-	-	-
CCM_05635	3740.71	8011.28	1.09872	0.00726295	0.176462	NW_006271972.1	-	-	opiNOG59742;sordNOG14294	S	-	hypothetical protein	18167653	-	-	-	-
CCM_00866	99.275	232.099	1.22524	0.0072816	0.176468	NW_006271969.1	-	-	hypNOG12561;necNOG09870	S	-	RNA polymerase II accessory factor, Cdc73	18162900	-	-	-	-
CCM_09197	117.385	706.604	2.58966	0.00731034	0.176719	NW_006271976.1	-	-	-	-	-	hypothetical protein	18171200	-	-	-	-
CCM_06243	5.44612	46.7766	3.10248	0.00749203	0.178543	NW_006271972.1	-	-	-	-	-	hypothetical protein	18168258	-	-	-	-
CCM_08478	15.2867	44.8406	1.55253	0.00807099	0.187437	NW_006271975.1	GO:0005525;GO:0003924	-	sorNOG06592;opiNOG05660	U	sp|P09922|MX1_MOUSE Interferon-induced GTP-binding protein Mx1 OS=Mus musculus GN=Mx1 PE=1 SV=1	interferon-induced GTP-binding protein Mx2	18170485	-	-	GO:0005525//GTP binding;GO:0003924//GTPase activity;	-
CCM_08629	10.9759	36.5156	1.73417	0.0084091	0.191237	NW_006271975.1	GO:0016021	-	eurotNOG12799	S	-	hypothetical protein	18170635	-	GO:0016021//integral component of membrane;	-	-
CCM_04007	19.8678	53.4901	1.42884	0.0086963	0.193639	NW_006271971.1	-	-	-	-	-	hypothetical protein	18166030	-	-	-	-
CCM_04009	1590.4	3317.29	1.06061	0.00897178	0.197482	NW_006271971.1	GO:0005975;GO:0016787;GO:0030246	-	opiNOG17689	R	sp|D4ATR3|A7629_ARTBC Uncharacterized secreted glycosidase ARB_07629 OS=Arthroderma benhamiae (strain ATCC MYA-4681 / CBS 112371) GN=ARB_07629 PE=1 SV=1	glycosyl hydrolase, family 92 protein	18166032	GO:0005975//carbohydrate metabolic process;	-	GO:0016787//hydrolase activity;GO:0030246//carbohydrate binding;	-
CCM_09207	1928.38	3963.75	1.03947	0.00979666	0.212819	NW_006271976.1	GO:0006807;GO:0016810	K01501	sordNOG04133;COG0388;opiNOG19344	RE	sp|A2RA31|NIT2_ASPNC Arylacetonitrilase OS=Aspergillus niger (strain CBS 513.88 / FGSC A1513) GN=An18g01740 PE=1 SV=1	aliphatic nitrilase, putative	18171210	GO:0006807//nitrogen compound metabolic process;	-	GO:0016810//hydrolase activity, acting on carbon-nitrogen (but not peptide) bonds;	ko00910(Nitrogen metabolism);ko00643(Styrene degradation);ko00627(Aminobenzoate degradation);ko00460(Cyanoamino acid metabolism);ko00380(Tryptophan metabolism)
CCM_04348	293.206	617.554	1.07465	0.0108394	0.230656	NW_006271971.1	GO:0016021	-	-	-	-	putative membrane protein	18166371	-	GO:0016021//integral component of membrane;	-	-
CCM_01846	26.1385	63.5263	1.28118	0.0108761	0.230925	NW_006271969.1	-	-	-	-	-	hypothetical protein	18163875	-	-	-	-
CCM_08422	893.174	2766.54	1.63107	0.0112836	0.236438	NW_006271975.1	-	-	-	-	-	hypothetical protein	18170430	-	-	-	-
CCM_00907	263.377	2194.63	3.05878	0.0114318	0.237264	NW_006271969.1	GO:0016021	-	sordNOG13016;sordNOG13248	S	-	integral membrane protein	18162941	-	GO:0016021//integral component of membrane;	-	-
CCM_07627	4.77854	28.4585	2.57422	0.0119653	0.242771	NW_006271974.1	GO:0016021	-	-	-	-	hypothetical protein	18169638	-	GO:0016021//integral component of membrane;	-	-
CCM_01068	525.577	1051.72	1.00077	0.0120524	0.243865	NW_006271969.1	GO:0009225;GO:0008460	-	opiNOG14134;sorNOG01812	G	sp|Q9SYM5|RHM1_ARATH Trifunctional UDP-glucose 4,6-dehydratase/UDP-4-keto-6-deoxy-D-glucose 3,5-epimerase/UDP-4-keto-L-rhamnose-reductase RHM1 OS=Arabidopsis thaliana GN=RHM1 PE=1 SV=1	dtdp-glucose 4,6-dehydratase	18163101	GO:0009225//nucleotide-sugar metabolic process;	-	GO:0008460//dTDP-glucose 4,6-dehydratase activity;	-
CCM_02384	777.656	1852.26	1.25208	0.0131904	0.257293	NW_006271970.1	GO:0030435;GO:0005634;GO:0006355	-	opiNOG31797;sordNOG08601	S	sp|J4KR13|VOSA_BEAB2 Spore development regulator vosA OS=Beauveria bassiana (strain ARSEF 2860) GN=vosA PE=2 SV=1	VosA	18164411	GO:0030435//sporulation resulting in formation of a cellular spore;GO:0006355//regulation of transcription, DNA-templated;	GO:0005634//nucleus;	-	-
CCM_04817	15.9128	43.6532	1.4559	0.0134505	0.261304	NW_006271971.1	GO:0005975;GO:0004568;GO:0008061;GO:0006032	K01183	COG3325;opiNOG23523;sordNOG10226	G	sp|P09805|KTXA_KLULA Killer toxin subunits alpha/beta OS=Kluyveromyces lactis (strain ATCC 8585 / CBS 2359 / DSM 70799 / NBRC 1267 / NRRL Y-1140 / WM37) PE=1 SV=1	class V chitinase Chi100	18166838	GO:0005975//carbohydrate metabolic process;GO:0006032//chitin catabolic process;	-	GO:0004568//chitinase activity;GO:0008061//chitin binding;	ko00520(Amino sugar and nucleotide sugar metabolism)
CCM_09250	1935.2	4616.58	1.25435	0.0138044	0.266026	NW_006271976.1	-	-	opiNOG10549;pleNOG08530	SR	sp|A0A097ZPE4|ANDK_EMEVA Cytochrome P450 monooxygenase andK OS=Emericella variicolor GN=andK PE=1 SV=1	Beta-lactamase-like protein	18171253	-	-	-	-
CCM_09343	12.9064	38.1885	1.56505	0.014164	0.270242	NW_006271977.1	-	-	hypNOG01855;sordNOG06640	S	-	hypothetical protein	18171346	-	-	-	-
CCM_00498	540.925	1148.41	1.08614	0.0163498	0.291111	NW_006271969.1	-	-	-	-	-	hypothetical protein	18162533	-	-	-	-
CCM_00684	44.5018	92.0811	1.04904	0.0164041	0.291538	NW_006271969.1	-	-	-	-	-	hypothetical protein	18162718	-	-	-	-
CCM_04020	34.4683	86.8866	1.33386	0.0166145	0.293646	NW_006271971.1	GO:0051213;GO:0055114	-	sorNOG01420;NOG52517;opiNOG58813	SR	sp|P37479|YYCE_BACSU Uncharacterized protein YycE OS=Bacillus subtilis (strain 168) GN=yycE PE=1 SV=1	Glyoxalase/bleomycin resistance protein/dioxygenase	18166043	GO:0055114//obsolete oxidation-reduction process;	-	GO:0051213//dioxygenase activity;	-
CCM_04781	36.0766	87.7625	1.28254	0.0170186	0.297063	NW_006271971.1	-	-	euNOG25701;sordNOG12331;eurotNOG06655;opiNOG19181	Q	sp|B8M9K8|TROPE_TALSN Short-chain dehydrogenase/reductase tropE OS=Talaromyces stipitatus (strain ATCC 10500 / CBS 375.48 / QM 6759 / NRRL 1006) GN=tropE PE=3 SV=1	short-chain dehydrogenase, putative	18166802	-	-	-	-
CCM_02067	585.912	1500.73	1.35691	0.0172748	0.299252	NW_006271970.1	GO:0016021;GO:0016757	K03843	sordNOG11557	M	sp|Q8X0H8|ALG2_NEUCR Alpha-1,3/1,6-mannosyltransferase alg-2 OS=Neurospora crassa (strain ATCC 24698 / 74-OR23-1A / CBS 708.71 / DSM 1257 / FGSC 987) GN=alg-2 PE=3 SV=1	mannosyltransferase	18164096	-	GO:0016021//integral component of membrane;	GO:0016757//glycosyltransferase activity;	ko00513(Various types of N-glycan biosynthesis);ko00510(N-Glycan biosynthesis)
CCM_02428	38.0828	96.9242	1.34772	0.0173065	0.299263	NW_006271970.1	-	-	-	-	-	hypothetical protein	18164455	-	-	-	-
CCM_07099	850.37	1776.06	1.06251	0.0174332	0.299833	NW_006271973.1	-	-	sordNOG04104	S	-	WSC domain-containing protein	18169110	-	-	-	-
CCM_04085	81.4849	858.686	3.39753	0.0186208	0.309937	NW_006271971.1	GO:0000981;GO:0005634;GO:0006357;GO:0008270	-	sordNOG04734;opiNOG23887	S	-	C6 transcription factor, putative	18166108	GO:0006357//regulation of transcription by RNA polymerase II;	GO:0005634//nucleus;	GO:0000981//DNA-binding transcription factor activity, RNA polymerase II-specific;GO:0008270//zinc ion binding;	-
CCM_04330	12.4027	36.2327	1.54664	0.0189386	0.312291	NW_006271971.1	-	-	-	-	-	hypothetical protein	18166353	-	-	-	-
CCM_04852	47.5902	96.0566	1.01322	0.0190151	0.312481	NW_006271971.1	-	-	-	-	-	hypothetical protein	18166873	-	-	-	-
CCM_00297	58.648	136.412	1.21781	0.0195805	0.319039	NW_006271969.1	GO:0016884	-	sorNOG08092;opiNOG07924;sordNOG05310	SR	sp|Q4J965|GATA_SULAC Glutamyl-tRNA(Gln) amidotransferase subunit A OS=Sulfolobus acidocaldarius (strain ATCC 33909 / DSM 639 / JCM 8929 / NBRC 15157 / NCIMB 11770) GN=gatA PE=3 SV=1	amidase, putative	18162332	-	-	GO:0016884//carbon-nitrogen ligase activity, with glutamine as amido-N-donor;	-
CCM_03301	0.368191	8.08444	4.45662	0.0200898	0.320801	NW_006271970.1	GO:0004386;GO:0003676;GO:0005524	K11594	sordNOG06306	A	sp|A2QI25|DED1_ASPNC ATP-dependent RNA helicase ded1 OS=Aspergillus niger (strain CBS 513.88 / FGSC A1513) GN=ded1 PE=3 SV=1	DEAD/DEAH box RNA helicase, putative	18165327	-	-	GO:0004386//helicase activity;GO:0003676//nucleic acid binding;GO:0005524//ATP binding;	ko05203(Viral carcinogenesis);ko05161(Hepatitis B);ko04622(RIG-I-like receptor signaling pathway)
CCM_08190	43.077	86.9845	1.01384	0.0202198	0.321807	NW_006271974.1	-	-	sordNOG14753;opiNOG19367;hypNOG06320	RGS	-	hypothetical protein	18170199	-	-	-	-
CCM_07168	17186.9	39122.8	1.1867	0.0210608	0.326527	NW_006271973.1	-	-	necNOG10386;opiNOG29477	S	-	isoflavone reductase family protein	18169179	-	-	-	-
CCM_04083	1.5886	16.7068	3.39461	0.0212256	0.327496	NW_006271971.1	-	-	-	-	-	hypothetical protein	18166106	-	-	-	-
CCM_08976	31.5435	67.0089	1.08701	0.0221377	0.336615	NW_006271975.1	-	-	pleNOG09214;opiNOG31965;opiNOG31843;sorNOG08573	SR	-	Cyclin-like F-box	18170980	-	-	-	-
CCM_02125	1162.76	2568.39	1.14331	0.0246916	0.354705	NW_006271970.1	-	-	pleNOG06000;sorNOG06180;opiNOG38186	R	-	hypothetical protein	18164153	-	-	-	-
CCM_04655	402.597	991.092	1.29968	0.0253997	0.359944	NW_006271971.1	GO:0015171;GO:0016021;GO:0003333	-	opiNOG01538;sorNOG06536;COG0531	E	sp|P50276|MUP1_YEAST High-affinity methionine permease OS=Saccharomyces cerevisiae (strain ATCC 204508 / S288c) GN=MUP1 PE=1 SV=1	high affinity methionine permease	18166677	GO:0003333//amino acid transmembrane transport;	GO:0016021//integral component of membrane;	GO:0015171//amino acid transmembrane transporter activity;	-
CCM_04958	7189.85	26085.3	1.8592	0.0278076	0.376403	NW_006271971.1	GO:0005975;GO:0004553	-	opiNOG06339;sordNOG11943	G	sp|O18835|BGLR_CANLF Beta-glucuronidase OS=Canis lupus familiaris GN=GUSB PE=1 SV=1	hydrolase, putative	18166978	GO:0005975//carbohydrate metabolic process;	-	GO:0004553//hydrolase activity, hydrolyzing O-glycosyl compounds;	-
CCM_06816	23.5591	52.14	1.14611	0.0284346	0.379395	NW_006271973.1	-	-	-	-	-	hypothetical protein	18168827	-	-	-	-
CCM_09217	70.875	155.58	1.13431	0.0288754	0.379612	NW_006271976.1	GO:0016021	-	hypNOG08337;opiNOG25150	S	-	Extracellular membrane protein, 8-cysteine region, CFEM	18171220	-	GO:0016021//integral component of membrane;	-	-
CCM_06244	43.4909	220.492	2.34194	0.0308495	0.392332	NW_006271972.1	-	-	-	-	-	hypothetical protein	18168259	-	-	-	-
CCM_09198	755.255	3133.19	2.0526	0.0313892	0.395999	NW_006271976.1	GO:0055114;GO:0016491;GO:0016021	-	opiNOG07845;sordNOG08325;COG0665	ER	sp|O43029|FAP1_SCHPO L-pipecolate oxidase OS=Schizosaccharomyces pombe (strain 972 / ATCC 24843) GN=fap1 PE=1 SV=1	sarcosine oxidase, putative	18171201	GO:0055114//obsolete oxidation-reduction process;	GO:0016021//integral component of membrane;	GO:0016491//oxidoreductase activity;	-
CCM_06405	448.39	913.477	1.02661	0.0324017	0.401756	NW_006271972.1	-	-	-	-	-	hypothetical protein	18168419	-	-	-	-
CCM_02210	109.081	243.89	1.16083	0.03317	0.407074	NW_006271970.1	-	-	fuNOG00029;opiNOG18275;sorNOG02482;sordNOG04435	ROG	sp|D4AUF1|WSCD1_ARTBC WSC domain-containing protein ARB_07867 OS=Arthroderma benhamiae (strain ATCC MYA-4681 / CBS 112371) GN=ARB_07867 PE=1 SV=1	copper radical oxidase	18164237	-	-	-	-
CCM_09391	319.518	788.313	1.30287	0.033665	0.408641	NW_006271977.1	-	-	-	-	-	hypothetical protein	18171394	-	-	-	-
CCM_05999	63.745	401.661	2.65559	0.0338721	0.409409	NW_006271972.1	GO:0019630;GO:0046279;GO:0003855	K03786	sordNOG12779;opiNOG32825	E	sp|C7Z622|3DHQ2_NECH7 Catabolic 3-dehydroquinase 2 OS=Nectria haematococca (strain 77-13-4 / ATCC MYA-4622 / FGSC 9596 / MPVI) GN=qutE2 PE=3 SV=1	3-dehydroquinate dehydratase	18168017	GO:0019630//quinate metabolic process;GO:0046279//3,4-dihydroxybenzoate biosynthetic process;	-	GO:0003855//3-dehydroquinate dehydratase activity;	ko00400(Phenylalanine, tyrosine and tryptophan biosynthesis)
CCM_07886	8870.94	18651.6	1.07214	0.0346038	0.413654	NW_006271974.1	GO:0016810;GO:0006807	-	opiNOG14976;COG0388	ER	sp|B6HCY4|CHT_PENRW Cyanide hydratase OS=Penicillium rubens (strain ATCC 28089 / DSM 1075 / NRRL 1951 / Wisconsin 54-1255) GN=PCH_Pc18g02620 PE=1 SV=1	cyanide hydratase/nitrilase, putative	18169896	GO:0006807//nitrogen compound metabolic process;	-	GO:0016810//hydrolase activity, acting on carbon-nitrogen (but not peptide) bonds;	-
CCM_05290	3279.01	8100.71	1.30479	0.0349466	0.416107	NW_006271972.1	-	-	sordNOG12433;opiNOG39445	J	sp|Q8U308|RIDA_PYRFU 2-iminobutanoate/2-iminopropanoate deaminase OS=Pyrococcus furiosus (strain ATCC 43587 / DSM 3638 / JCM 8422 / Vc1) GN=yjgF PE=1 SV=1	L-PSP endoribonuclease family protein Brt1	18167308	-	-	-	-
CCM_07916	185.351	463.036	1.32087	0.0377106	0.432388	NW_006271974.1	GO:0016021	-	opiNOG67856	R	-	hypothetical protein	18169926	-	GO:0016021//integral component of membrane;	-	-
CCM_03469	229.753	880.661	1.9385	0.0387028	0.439043	NW_006271970.1	-	-	-	-	-	Ubiquitin	18165495	-	-	-	-
CCM_02062	1938.12	4949.6	1.35266	0.0391502	0.440416	NW_006271970.1	GO:0008270;GO:0006357;GO:0000981;GO:0005634	-	opiNOG54677;sorNOG06000	S	sp|B8NM76|USTR_ASPFN ustiloxin B cluster transcription factor ustR OS=Aspergillus flavus (strain ATCC 200026 / FGSC A1120 / NRRL 3357 / JCM 12722 / SRRC 167) GN=ustR PE=3 SV=2	C6 transcription factor, putative	18164091	GO:0006357//regulation of transcription by RNA polymerase II;	GO:0005634//nucleus;	GO:0008270//zinc ion binding;GO:0000981//DNA-binding transcription factor activity, RNA polymerase II-specific;	-
CCM_02410	11.4783	51.4555	2.16442	0.0435313	0.458417	NW_006271970.1	-	-	-	-	-	hypothetical protein	18164437	-	-	-	-
CCM_06862	38.7003	86.7401	1.16436	0.0446901	0.463305	NW_006271973.1	GO:0005199;GO:0009277	-	eurotNOG06611;opiNOG67177	R	sp|P28346|RODL_EMENI Rodlet protein OS=Emericella nidulans (strain FGSC A4 / ATCC 38163 / CBS 112.46 / NRRL 194 / M139) GN=rodA PE=2 SV=1	Hydrophobin	18168873	-	GO:0009277//fungal-type cell wall;	GO:0005199//structural constituent of cell wall;	-
CCM_06245	70.3992	291.644	2.05058	0.0456678	0.465818	NW_006271972.1	-	-	-	-	-	hypothetical protein	18168260	-	-	-	-
CCM_07327	2671.6	8956.57	1.74524	0.0481528	0.477399	NW_006271974.1	-	-	-	-	-	hypothetical protein	18169338	-	-	-	-
CCM_02374	627.793	2017.76	1.68439	0.0491838	0.48165	NW_006271970.1	GO:0055114;GO:0016491;GO:0016740;GO:0031177	-	opiNOG01973;sordNOG15538	IQ	sp|N4WHE3|PKS1_COCH4 Reducing polyketide synthase PKS1 OS=Cochliobolus heterostrophus (strain C4 / ATCC 48331 / race T) GN=PKS1 PE=3 SV=1	polyketide synthase, putative	18164401	GO:0055114//obsolete oxidation-reduction process;	-	GO:0016491//oxidoreductase activity;GO:0016740//transferase activity;GO:0031177//phosphopantetheine binding;	-
