# Supplementary material for: Genome resequencing and transcriptome analysis reveal the molecular mechanism of albinism in Cordyceps militaris
Source: Front Microbiol. 2023 Apr 11;14:1153153. doi: 10.3389/fmicb.2023.1153153 (PMC10126257; doi:10.3389/fmicb.2023.1153153)
Supplement: Supplementary file 8 [file Table_8.XLSX]

## Sheet: Sheet1
Table S8. Differentially expressed genes in the WTL compared with WT. WT, wild type before light treatment; WTL, wild type after light treatment.
Gene ID	BaseMean		log2FoldChange	pval	padj	Chromosome	GO	KEGG	eggNOG	eggNOG_Class	Swissprot	NR	Entrez_geneID	BP	CC	MF	Pathway
	WT	WTL
CCM_00793	8510.36	45.814	-7.53729	2.50206e-86	8.02161e-83	NW_006271969.1	-	-	arthNOG12677	R	-	hypothetical protein	18162827	-	-	-	-
CCM_08923	2501.64	339.653	-2.88074	1.08243e-20	8.1941e-18	NW_006271975.1	GO:0004499;GO:0016021;GO:0050661;GO:0050660;GO:0055114	K00485	opiNOG19675	Q	sp|Q01740|FMO1_HUMAN Dimethylaniline monooxygenase [N-oxide-forming] 1 OS=Homo sapiens GN=FMO1 PE=1 SV=3	dimethylaniline monooxygenase	18170928	GO:0055114//obsolete oxidation-reduction process;	GO:0016021//integral component of membrane;	GO:0004499//N,N-dimethylaniline monooxygenase activity;GO:0050661//NADP binding;GO:0050660//flavin adenine dinucleotide binding;	ko00982(Drug metabolism - cytochrome P450)
CCM_08671	3428.33	567.116	-2.59579	9.33612e-18	6.41391e-15	NW_006271975.1	-	-	-	-	-	hypothetical protein	18170677	-	-	-	-
CCM_08231	440.882	73.4878	-2.58482	5.80602e-14	2.42793e-11	NW_006271974.1	GO:0006032;GO:0005975;GO:0004568;GO:0008061	K01183	opiNOG19734;sordNOG05395	G	sp|P09805|KTXA_KLULA Killer toxin subunits alpha/beta OS=Kluyveromyces lactis (strain ATCC 8585 / CBS 2359 / DSM 70799 / NBRC 1267 / NRRL Y-1140 / WM37) PE=1 SV=1	class V chitinase, putative	18170239	GO:0006032//chitin catabolic process;GO:0005975//carbohydrate metabolic process;	-	GO:0004568//chitinase activity;GO:0008061//chitin binding;	ko00520(Amino sugar and nucleotide sugar metabolism)
CCM_01856	215.797	26.1949	-3.04232	8.27363e-14	3.12188e-11	NW_006271969.1	-	-	sordNOG07524;opiNOG22099	S	-	NAD(P)-binding domain	18163885	-	-	-	-
CCM_05119	3169.8	681.212	-2.21822	9.91227e-14	3.53097e-11	NW_006271972.1	GO:0055114;GO:0016491;GO:0019825;GO:0020037	K05916	sordNOG06819;opiNOG05259	C	sp|Q7TTP0|HMP_BORPE Flavohemoprotein OS=Bordetella pertussis (strain Tohama I / ATCC BAA-589 / NCTC 13251) GN=hmp PE=3 SV=1	flavohemoprotein	18167139	GO:0055114//obsolete oxidation-reduction process;	-	GO:0016491//oxidoreductase activity;GO:0019825//oxygen binding;GO:0020037//heme binding;	-
CCM_08968	4256.86	732.487	-2.53891	8.28196e-13	2.56954e-10	NW_006271975.1	GO:0016021	-	opiNOG43732;opiNOG58892;pleNOG06342;NOG155141;sordNOG13906	S	-	hypothetical protein	18170972	-	GO:0016021//integral component of membrane;	-	-
CCM_06432	529.202	102.622	-2.36649	1.66017e-12	4.83865e-10	NW_006271973.1	GO:0006355	-	magNOG04281;sorNOG02651;sordNOG09251;opiNOG16598	S	sp|O13360|FLUF_NEUCR Conidial development protein fluffy OS=Neurospora crassa (strain ATCC 24698 / 74-OR23-1A / CBS 708.71 / DSM 1257 / FGSC 987) GN=fl PE=2 SV=1	hypothetical protein	18168446	GO:0006355//regulation of transcription, DNA-templated;	-	-	-
CCM_01702	361.637	69.113	-2.38751	9.8335e-12	2.62718e-09	NW_006271969.1	-	-	opiNOG64237	S	sp|Q02481|Y3691_SHEFN Uncharacterized protein Sfri_3691 OS=Shewanella frigidimarina (strain NCIMB 400) GN=Sfri_3691 PE=4 SV=2	glyoxalase family protein	18163732	-	-	-	-
CCM_00183	206.233	31.0367	-2.73223	1.16272e-11	3.02245e-09	NW_006271969.1	GO:0016853;GO:0005737;GO:0009072	K01800	opiNOG09837	E	sp|O43123|MAAI_EMENI Maleylacetoacetate isomerase OS=Emericella nidulans (strain FGSC A4 / ATCC 38163 / CBS 112.46 / NRRL 194 / M139) GN=maiA PE=1 SV=1	maleylacetoacetate isomerase MaiA	18162218	GO:0009072//aromatic amino acid family metabolic process;	GO:0005737//cytoplasm;	GO:0016853//isomerase activity;	ko00643(Styrene degradation);ko00350(Tyrosine metabolism)
CCM_00072	2735.39	705.875	-1.95426	4.16489e-11	1.00145e-08	NW_006271969.1	GO:0003700;GO:0008270;GO:0043565;GO:0006355	-	sordNOG11261	K	sp|Q00858|CGPB_FUSSO Cutinase gene palindrome-binding protein OS=Fusarium solani subsp. pisi PE=2 SV=1	Cutinase palindrome-binding protein	18162107	GO:0006355//regulation of transcription, DNA-templated;	-	GO:0003700//DNA-binding transcription factor activity;GO:0008270//zinc ion binding;GO:0043565//sequence-specific DNA binding;	-
CCM_00644	1794.53	466.912	-1.94238	8.47317e-11	1.94036e-08	NW_006271969.1	GO:0046872	-	opiNOG56341	R	-	hypothetical protein	18162679	-	-	GO:0046872//metal ion binding;	-
CCM_03441	1422.82	249.088	-2.51403	8.83052e-11	1.97516e-08	NW_006271970.1	-	-	necNOG13772;opiNOG42636;sordNOG14725	SR	-	siderophore biosynthesis enzyme, putative	18165467	-	-	-	-
CCM_05684	863.453	209.685	-2.04189	9.75075e-11	2.09448e-08	NW_006271972.1	GO:0003899;GO:0006359	K03024	sordNOG13921;NOG74705	FK	-	DNA-directed RNA polymerase, III, C31 subunit, fungi	18167702	GO:0006359//regulation of transcription by RNA polymerase III;	-	GO:0003899//DNA-directed 5'-3' RNA polymerase activity;	ko04623(Cytosolic DNA-sensing pathway);ko03020(RNA polymerase)
CCM_09497	2157.14	565.675	-1.93108	9.79952e-11	2.09448e-08	NW_006271977.1	-	-	eurotNOG08598	S	-	hypothetical protein	18171499	-	-	-	-
CCM_01811	281.319	56.0654	-2.32702	1.6939e-10	3.32488e-08	NW_006271969.1	GO:0016747;GO:0006633	K09458	sordNOG07191	H	sp|Q8L3X9|KASM_ARATH 3-oxoacyl-[acyl-carrier-protein] synthase, mitochondrial OS=Arabidopsis thaliana GN=KAS PE=1 SV=1	3-oxoacyl-(acyl-carrier-protein) synthase 2	18163841	GO:0006633//fatty acid biosynthetic process;	-	GO:0016747//acyltransferase activity, transferring groups other than amino-acyl groups;	ko00780(Biotin metabolism);ko00061(Fatty acid biosynthesis)
CCM_08604	326.128	74.1309	-2.13729	1.18404e-09	2.03358e-07	NW_006271975.1	GO:0020037;GO:0005506;GO:0016705;GO:0055114;GO:0016021;GO:0004497	K07824	COG2124;sordNOG04535	Q	sp|P17549|CP53_ASPNG Benzoate 4-monooxygenase OS=Aspergillus niger GN=bphA PE=1 SV=1	cytochrome P450 3A3	18170610	GO:0055114//obsolete oxidation-reduction process;	GO:0016021//integral component of membrane;	GO:0020037//heme binding;GO:0005506//iron ion binding;GO:0016705//oxidoreductase activity, acting on paired donors, with incorporation or reduction of molecular oxygen;GO:0004497//monooxygenase activity;	ko00627(Aminobenzoate degradation);ko00362(Benzoate degradation)
CCM_04979	3712.09	1090.6	-1.76711	1.70748e-09	2.85064e-07	NW_006271971.1	GO:0055114;GO:0046872;GO:0004784;GO:0019430	K04564	sordNOG11985	P	sp|Q9Y783|SODM_NEUCR Superoxide dismutase [Mn], mitochondrial OS=Neurospora crassa (strain ATCC 24698 / 74-OR23-1A / CBS 708.71 / DSM 1257 / FGSC 987) GN=sod-2 PE=3 SV=1	superoxide dismutase	18166999	GO:0055114//obsolete oxidation-reduction process;GO:0019430//removal of superoxide radicals;	-	GO:0046872//metal ion binding;GO:0004784//superoxide dismutase activity;	ko05417(Lipid and atherosclerosis);ko05208(Chemical carcinogenesis - reactive oxygen species);ko05016(Huntington disease);ko04213(Longevity regulating pathway - multiple species);ko04212(Longevity regulating pathway - worm);ko04211(Longevity regulating pathway);ko04146(Peroxisome);ko04068(FoxO signaling pathway);ko04013(MAPK signaling pathway - fly)
CCM_09519	388.791	95.3206	-2.02814	1.71904e-09	2.85064e-07	NW_006271977.1	-	-	-	-	-	hypothetical protein	18171521	-	-	-	-
CCM_04004	340.707	68.9901	-2.30407	1.75961e-09	2.86846e-07	NW_006271971.1	-	-	COG0346;sordNOG14377;opiNOG39354	SER	-	glyoxalase family protein	18166027	-	-	-	-
CCM_08879	762.753	205.491	-1.89214	1.86169e-09	2.98429e-07	NW_006271975.1	-	-	opiNOG48269;NOG162124	S	-	hypothetical protein	18170884	-	-	-	-
CCM_03102	1885.66	550.476	-1.77632	2.23341e-09	3.52146e-07	NW_006271970.1	GO:0006788;GO:0004392;GO:0016021	-	sordNOG04513;NOG132479	S	-	hem oxygenase-like, multi-helical	18165129	GO:0006788//heme oxidation;	GO:0016021//integral component of membrane;	GO:0004392//heme oxygenase (decyclizing) activity;	-
CCM_04360	586.474	154.856	-1.92114	2.39585e-09	3.71666e-07	NW_006271971.1	-	-	-	-	-	hypothetical protein	18166383	-	-	-	-
CCM_08587	1686.26	501.902	-1.74835	3.61916e-09	5.43892e-07	NW_006271975.1	GO:0008168;GO:0009236;GO:0032259	-	hypNOG10477	S	-	hypothetical protein	18170593	GO:0009236//cobalamin biosynthetic process;GO:0032259//methylation;	-	GO:0008168//methyltransferase activity;	-
CCM_08572	444.516	113.516	-1.96934	3.85147e-09	5.69899e-07	NW_006271975.1	GO:0016021;GO:0000297;GO:0000329;GO:1903710;GO:1903711;GO:0005886;GO:0015606	-	sordNOG04984	R	sp|A0A161CLJ6|MRR1_MONRU Citrinin biosynthesis cluster MFS transporter mrr1 OS=Monascus ruber GN=mrr1 PE=3 SV=1	bicyclomycin resistance protein, putative	18170578	GO:1903710//spermine transmembrane transport;GO:1903711//spermidine transmembrane transport;	GO:0016021//integral component of membrane;GO:0000329//fungal-type vacuole membrane;GO:0005886//plasma membrane;	GO:0000297//spermine transmembrane transporter activity;GO:0015606//spermidine transmembrane transporter activity;	-
CCM_00063	158.278	28.5975	-2.4685	4.33902e-09	6.22876e-07	NW_006271969.1	GO:0016740;GO:0016021	-	sordNOG08234	S	-	polysaccharide synthase, putative	18162098	-	GO:0016021//integral component of membrane;	GO:0016740//transferase activity;	-
CCM_05964	1043.34	303.998	-1.77907	4.58916e-09	6.49096e-07	NW_006271972.1	-	-	opiNOG29152;sordNOG04426	S	-	hypothetical protein	18167982	-	-	-	-
CCM_09272	688.057	202.046	-1.76785	1.46644e-08	2.04409e-06	NW_006271976.1	GO:0016021	-	opiNOG60156;opiNOG60688	S	-	hypothetical protein	18171275	-	GO:0016021//integral component of membrane;	-	-
CCM_01555	2627.9	588.898	-2.15782	1.51572e-08	2.0826e-06	NW_006271969.1	-	-	sorNOG02083;opiNOG30352	R	sp|P40618|HMGB3_CHICK High mobility group protein B3 OS=Gallus gallus GN=HMGB3 PE=2 SV=3	High mobility group, superfamily	18163586	-	-	-	-
CCM_08725	856.5	255.319	-1.74615	1.65476e-08	2.24161e-06	NW_006271975.1	GO:0016787	-	sordNOG11978;opiNOG16393;pleNOG07953;saccNOG05261	I	sp|Q6CGL4|APTH1_YARLI Acyl-protein thioesterase 1 OS=Yarrowia lipolytica (strain CLIB 122 / E 150) GN=YALI0A18337g PE=3 SV=1	acyl-protein thioesterase 1	18170731	-	-	GO:0016787//hydrolase activity;	-
CCM_00894	189.465	40.8542	-2.21337	1.75434e-08	2.3435e-06	NW_006271969.1	GO:0016740	-	NOG111989;sordNOG10097	S	sp|P41929|LYC1_YARLI Lysine acetyltransferase OS=Yarrowia lipolytica (strain CLIB 122 / E 150) GN=LYC1 PE=4 SV=2	GNAT family acetyltransferase, putative	18162928	-	-	GO:0016740//transferase activity;	-
CCM_00491	1463.15	453.517	-1.68985	1.79994e-08	2.37149e-06	NW_006271969.1	GO:0016310;GO:0030246;GO:0016301;GO:0005975	K07106	opiNOG32786;COG2103	SR	sp|Q9KXT4|MURQ_STRCO N-acetylmuramic acid 6-phosphate etherase OS=Streptomyces coelicolor (strain ATCC BAA-471 / A3(2) / M145) GN=murQ PE=3 SV=1	glucokinase regulator family protein, putative	18162526	GO:0016310//phosphorylation;GO:0005975//carbohydrate metabolic process;	-	GO:0030246//carbohydrate binding;GO:0016301//kinase activity;	ko00520(Amino sugar and nucleotide sugar metabolism)
CCM_08727	3495.47	434.937	-3.00661	3.24019e-08	3.9954e-06	NW_006271975.1	GO:0055114;GO:0016491;GO:0005506	-	opiNOG12369;sordNOG05441	Q	sp|Q7LL04|YQK1_SCHPO UPF0676 protein C1494.01 OS=Schizosaccharomyces pombe (strain 972 / ATCC 24843) GN=SPCC1494.01 PE=3 SV=2	gibberellin 20-oxidase, putative	18170732	GO:0055114//obsolete oxidation-reduction process;	-	GO:0016491//oxidoreductase activity;GO:0005506//iron ion binding;	-
CCM_05879	408.51	114.991	-1.82885	4.372e-08	5.19135e-06	NW_006271972.1	-	K17362	sordNOG14231	S	sp|Q9NPJ3|ACO13_HUMAN Acyl-coenzyme A thioesterase 13 OS=Homo sapiens GN=ACOT13 PE=1 SV=1	Thioesterase superfamily	18167897	-	-	-	-
CCM_06362	134.592	25.4405	-2.4034	4.45783e-08	5.22567e-06	NW_006271972.1	GO:0000981;GO:0005634;GO:0006357;GO:0008270	-	opiNOG70699;opiNOG03965	S	-	Fungal transcriptional regulatory protein	18168376	GO:0006357//regulation of transcription by RNA polymerase II;	GO:0005634//nucleus;	GO:0000981//DNA-binding transcription factor activity, RNA polymerase II-specific;GO:0008270//zinc ion binding;	-
CCM_06216	1408.15	162.266	-3.11737	4.57478e-08	5.22567e-06	NW_006271972.1	-	-	-	-	-	hypothetical protein	18168231	-	-	-	-
CCM_07278	131.207	12.6285	-3.37709	4.61824e-08	5.22567e-06	NW_006271973.1	GO:0016301;GO:0016310;GO:0005524	-	sorNOG05364;opiNOG57264	S	-	zeta toxin family protein	18169289	GO:0016310//phosphorylation;	-	GO:0016301//kinase activity;GO:0005524//ATP binding;	-
CCM_01130	755.467	233.519	-1.69383	5.50427e-08	6.08507e-06	NW_006271969.1	GO:0009086;GO:0005737;GO:0004414	-	opiNOG03428;sordNOG07056	IE	sp|Q5AT15|SST_EMENI Serine O-succinyltransferase OS=Emericella nidulans (strain FGSC A4 / ATCC 38163 / CBS 112.46 / NRRL 194 / M139) GN=cysA PE=1 SV=1	homoserine O-acetyltransferase	18163162	GO:0009086//methionine biosynthetic process;	GO:0005737//cytoplasm;	GO:0004414//homoserine O-acetyltransferase activity;	-
CCM_02177	157.925	0	-Inf	6.46619e-08	7.06725e-06	NW_006271970.1	GO:0030246;GO:0004190;GO:0006508	-	opiNOG28710;sordNOG08190;opiNOG28582;NOG51745	RS	sp|P24665|PRTA_ASPNG Aspergillopepsin-2 OS=Aspergillus niger PE=1 SV=1	Concanavalin A-like lectin/glucanase	18164205	GO:0006508//proteolysis;	-	GO:0030246//carbohydrate binding;GO:0004190//aspartic-type endopeptidase activity;	-
CCM_01075	1800.54	226.497	-2.99087	1.25208e-07	1.30897e-05	NW_006271969.1	-	-	-	-	-	hypothetical protein	18163108	-	-	-	-
CCM_04234	2917.08	1001.87	-1.54184	1.28607e-07	1.33005e-05	NW_006271971.1	-	-	sordNOG04723;hypNOG00402	SR	-	hypothetical protein	18166257	-	-	-	-
CCM_03238	2473.26	858.664	-1.52625	1.61039e-07	1.63039e-05	NW_006271970.1	-	-	sorNOG05022;sordNOG13154;opiNOG38897	S	sp|Q9MBH1|AIG2C_ARATH Protein AIG2 C OS=Arabidopsis thaliana GN=AIG2C PE=1 SV=1	disease resistance protein Aig2, putative	18165264	-	-	-	-
CCM_07300	5935.73	2108.37	-1.4933	1.71468e-07	1.71789e-05	NW_006271973.1	GO:0016021	-	opiNOG22506;sordNOG09094	S	-	hypothetical protein	18169311	-	GO:0016021//integral component of membrane;	-	-
CCM_09479	6319.14	702.025	-3.17013	1.86744e-07	1.85166e-05	NW_006271977.1	GO:0030598;GO:0017148	-	NOG137058	S	sp|P28590|ABRC_ABRPR Abrin-c OS=Abrus precatorius PE=1 SV=1	Ribosome-inactivating protein	18171481	GO:0017148//negative regulation of translation;	-	GO:0030598//rRNA N-glycosylase activity;	-
CCM_06064	2660.06	936.839	-1.50559	2.79215e-07	2.71262e-05	NW_006271972.1	GO:0016301;GO:0016310	K06981	-	-	sp|O26153|IPK_METTH Isopentenyl phosphate kinase OS=Methanothermobacter thermautotrophicus (strain ATCC 29096 / DSM 1053 / JCM 10044 / NBRC 100330 / Delta H) GN=MTH_47 PE=1 SV=1	kinase	18168079	GO:0016310//phosphorylation;	-	GO:0016301//kinase activity;	ko00900(Terpenoid backbone biosynthesis)
CCM_05372	74.56	10.5399	-2.82254	3.08451e-07	2.96669e-05	NW_006271972.1	-	-	opiNOG28313;sordNOG04267;opiNOG36993;euroNOG11263	QRS	sp|A0A097ZPD4|ANDH_EMEVA Oxidoreductase andH OS=Emericella variicolor GN=andH PE=1 SV=1	short-chain dehydrogenases/reductase, putative	18167390	-	-	-	-
CCM_00281	966.229	331.494	-1.54338	3.77033e-07	3.5552e-05	NW_006271969.1	GO:0016491;GO:0055114	-	sordNOG08158;opiNOG20327	R	sp|Q9Z3S3|ORDL_RHIME Probable oxidoreductase OrdL OS=Rhizobium meliloti (strain 1021) GN=ordL PE=4 SV=2	FAD dependent oxidoreductase	18162316	GO:0055114//obsolete oxidation-reduction process;	-	GO:0016491//oxidoreductase activity;	-
CCM_01528	173.134	44.513	-1.95959	6.16259e-07	5.53942e-05	NW_006271969.1	GO:0016021	-	opiNOG11343;sorNOG07567	Q	sp|Q48436|BUDC_KLEPN Diacetyl reductase [(S)-acetoin forming] OS=Klebsiella pneumoniae GN=budC PE=1 SV=2	short chain dehydrogenase	18163559	-	GO:0016021//integral component of membrane;	-	-
CCM_01613	73.0368	11.5428	-2.66163	8.42357e-07	7.50166e-05	NW_006271969.1	GO:0016740	-	sordNOG07716;opiNOG20784	S	sp|B8NM79|USTS_ASPFN Glutathione S-transferase-like protein ustS OS=Aspergillus flavus (strain ATCC 200026 / FGSC A1120 / NRRL 3357 / JCM 12722 / SRRC 167) GN=ustS PE=1 SV=2	Glutathione S-transferase	18163643	-	-	GO:0016740//transferase activity;	-
CCM_01999	1077.75	388.045	-1.47373	8.7848e-07	7.75158e-05	NW_006271970.1	GO:0016874;GO:0008152	K01908	opiNOG00481;COG0365;sordNOG08981	I	sp|P28812|Y3568_PSEAE Uncharacterized protein PA3568 OS=Pseudomonas aeruginosa (strain ATCC 15692 / DSM 22644 / CIP 104116 / JCM 14847 / LMG 12228 / 1C / PRS 101 / PAO1) GN=PA3568 PE=3 SV=2	acetate-CoA ligase	18164028	GO:0008152//metabolic process;	-	GO:0016874//ligase activity;	ko00640(Propanoate metabolism)
CCM_01567	1583.39	344.475	-2.20054	1.02236e-06	8.85861e-05	NW_006271969.1	-	-	hypNOG02587	S	-	hypothetical protein	18163598	-	-	-	-
CCM_06636	79.1063	13.5752	-2.54281	1.07538e-06	9.16144e-05	NW_006271973.1	-	-	opiNOG28819;sorNOG04740	S	-	hypothetical protein	18168650	-	-	-	-
CCM_05450	2017.74	750.37	-1.42706	1.08589e-06	9.16144e-05	NW_006271972.1	GO:0016021;GO:0055114;GO:0016620	-	KOG2450;opiNOG05724	C	sp|O05619|VDH_PSEUH Vanillin dehydrogenase OS=Pseudomonas sp. (strain HR199 / DSM 7063) GN=vdh PE=1 SV=1	aldehyde dehydrogenase family protein	18167468	GO:0055114//obsolete oxidation-reduction process;	GO:0016021//integral component of membrane;	GO:0016620//oxidoreductase activity, acting on the aldehyde or oxo group of donors, NAD or NADP as acceptor;	-
CCM_04978	3094.47	204.023	-3.92289	1.30641e-06	0.000106484	NW_006271971.1	-	-	opiNOG61747;sordNOG14699	S	-	hypothetical protein	18166998	-	-	-	-
CCM_07713	771.086	166.026	-2.21548	1.5566e-06	0.00012581	NW_006271974.1	GO:0016620;GO:0055114	-	opiNOG17606;sordNOG10662	C	sp|Q3BXK7|BETB_XANC5 NAD/NADP-dependent betaine aldehyde dehydrogenase OS=Xanthomonas campestris pv. vesicatoria (strain 85-10) GN=betB PE=3 SV=1	betaine aldehyde dehydrogenase	18169723	GO:0055114//obsolete oxidation-reduction process;	-	GO:0016620//oxidoreductase activity, acting on the aldehyde or oxo group of donors, NAD or NADP as acceptor;	-
CCM_05328	167.225	41.5636	-2.0084	1.62623e-06	0.000129265	NW_006271972.1	GO:0055114;GO:0016491	-	sordNOG05370	R	sp|Q9LES4|L2HDH_ARATH L-2-hydroxyglutarate dehydrogenase, mitochondrial OS=Arabidopsis thaliana GN=L2HGDH PE=1 SV=1	L-2-hydroxyglutarate dehydrogenase	18167346	GO:0055114//obsolete oxidation-reduction process;	-	GO:0016491//oxidoreductase activity;	-
CCM_04965	556.785	193.825	-1.52236	1.64231e-06	0.000129473	NW_006271971.1	-	-	magNOG07780;sorNOG07140	S	-	hypothetical protein	18166985	-	-	-	-
CCM_05010	155.159	40.399	-1.94135	1.68072e-06	0.000131424	NW_006271971.1	GO:0006357;GO:0008270;GO:0005634;GO:0000981	-	-	-	-	hypothetical protein	18167030	GO:0006357//regulation of transcription by RNA polymerase II;	GO:0005634//nucleus;	GO:0008270//zinc ion binding;GO:0000981//DNA-binding transcription factor activity, RNA polymerase II-specific;	-
CCM_09543	475.558	165.034	-1.52686	2.02538e-06	0.000157097	NW_006271977.1	GO:0055114;GO:0004497	-	opiNOG19837;COG2072	RP	sp|A0R665|ETHA_MYCS2 FAD-containing monooxygenase EthA OS=Mycobacterium smegmatis (strain ATCC 700084 / mc(2)155) GN=ethA PE=3 SV=1	monooxygenase, putative	18171545	GO:0055114//obsolete oxidation-reduction process;	-	GO:0004497//monooxygenase activity;	-
CCM_03699	444.243	154.46	-1.52411	2.27376e-06	0.000173564	NW_006271971.1	-	-	necNOG13965;NOG188330;hypNOG10624;opiNOG64126;saccNOG09281	ORS	-	GLEYA adhesin domain	18165723	-	-	-	-
CCM_09165	272.619	87.4201	-1.64085	2.73609e-06	0.000202428	NW_006271976.1	GO:0006888;GO:0005737	K20301	sordNOG07250	S	sp|Q54CU7|TPC2L_DICDI Trafficking protein particle complex subunit 2-like protein OS=Dictyostelium discoideum GN=trappc2l PE=3 SV=1	Longin-like protein	18171168	GO:0006888//endoplasmic reticulum to Golgi vesicle-mediated transport;	GO:0005737//cytoplasm;	-	-
CCM_01456	421.753	146.931	-1.52126	2.82299e-06	0.000207264	NW_006271969.1	GO:0005759;GO:0016740;GO:0016226	K22073	sordNOG06906;opiNOG06342	KE	sp|A4R8F9|CAF17_MAGO7 Putative transferase CAF17, mitochondrial OS=Magnaporthe oryzae (strain 70-15 / ATCC MYA-4617 / FGSC 8958) GN=CAF17 PE=3 SV=1	aminomethyl transferase	18163487	GO:0016226//iron-sulfur cluster assembly;	GO:0005759//mitochondrial matrix;	GO:0016740//transferase activity;	-
CCM_09154	178.199	51.2622	-1.79752	3.26271e-06	0.000237733	NW_006271976.1	-	-	sordNOG06658;opiNOG22526	S	sp|Q0TVF9|ALG3_PHANO Dol-P-Man:Man(5)GlcNAc(2)-PP-Dol alpha-1,3-mannosyltransferase OS=Phaeosphaeria nodorum (strain SN15 / ATCC MYA-4574 / FGSC 10173) GN=ALG3 PE=3 SV=2	hypothetical protein	18171157	-	-	-	-
CCM_00187	483.469	171.396	-1.49609	3.85083e-06	0.00027435	NW_006271969.1	GO:0003993;GO:0046872;GO:0016311	K22390	opiNOG03139;sorNOG06777;sordNOG10471	G	sp|Q12546|PPA_ASPFI Acid phosphatase OS=Aspergillus ficuum GN=aphA PE=1 SV=1	metallophosphoesterase	18162222	GO:0016311//dephosphorylation;	-	GO:0003993//acid phosphatase activity;GO:0046872//metal ion binding;	-
CCM_01123	583.307	211.972	-1.46038	4.01408e-06	0.000283878	NW_006271969.1	GO:0051213;GO:0004462;GO:0046872;GO:0055114	-	hypNOG11213;necNOG10958	GR	-	Glyoxalase/bleomycin resistance protein/dioxygenase	18163155	GO:0055114//obsolete oxidation-reduction process;	-	GO:0051213//dioxygenase activity;GO:0004462//lactoylglutathione lyase activity;GO:0046872//metal ion binding;	-
CCM_02122	21199.2	8256.39	-1.36043	4.8446e-06	0.000335219	NW_006271970.1	-	-	opiNOG64166;hypNOG02574	S	-	hypothetical protein	18164150	-	-	-	-
CCM_09649	467.393	118.396	-1.98102	5.05862e-06	0.000343627	NW_006271978.1	GO:0016021	-	hypNOG05526	S	-	hypothetical protein	18171651	-	GO:0016021//integral component of membrane;	-	-
CCM_02093	4615.85	1686.01	-1.45298	5.0733e-06	0.000343627	NW_006271970.1	-	-	opiNOG47220	R	-	hypothetical protein	18164122	-	-	-	-
CCM_08557	176.045	52.4493	-1.74695	5.30056e-06	0.000356509	NW_006271975.1	GO:0016021	-	-	-	-	hypothetical protein	18170564	-	GO:0016021//integral component of membrane;	-	-
CCM_05753	723.959	277.259	-1.38467	5.49924e-06	0.00036477	NW_006271972.1	-	-	-	-	-	hypothetical protein	18167771	-	-	-	-
CCM_05909	1826.03	723.436	-1.33577	6.80841e-06	0.000445909	NW_006271972.1	GO:0016485;GO:0009898;GO:0007126;GO:0001403	K20063	necNOG07163;opiNOG02229;sordNOG15551	R	sp|Q7SGZ5|PALF_NEUCR pH-response regulator protein palF/prr-3 OS=Neurospora crassa (strain ATCC 24698 / 74-OR23-1A / CBS 708.71 / DSM 1257 / FGSC 987) GN=prr-3 PE=3 SV=2	pH response protein PalF	18167927	GO:0016485//protein processing;GO:0001403//invasive growth in response to glucose limitation;	GO:0009898//cytoplasmic side of plasma membrane;	-	-
CCM_09214	2393.86	975.314	-1.2954	6.81521e-06	0.000445909	NW_006271976.1	GO:0009116;GO:0016310;GO:0016301	-	opiNOG24344;sordNOG06219;sorNOG07485;opiNOG15823	R	-	serine/threonine-protein kinase ripk4, putative	18171217	GO:0009116//nucleoside metabolic process;GO:0016310//phosphorylation;	-	GO:0016301//kinase activity;	-
CCM_01988	237.605	78.8468	-1.59144	7.48649e-06	0.000481328	NW_006271970.1	-	-	-	-	-	hypothetical protein	18164017	-	-	-	-
CCM_06269	1312.3	450.034	-1.54399	8.60065e-06	0.000540661	NW_006271972.1	GO:0005524;GO:0060543;GO:0005634;GO:0032508;GO:0033567;GO:0036297;GO:0043138;GO:0016021;GO:0070336;GO:0000725	K19717	opiNOG34746;opiNOG41984;fuNOG14817	S	-	hypothetical protein	18168284	GO:0060543//negative regulation of strand invasion;GO:0032508//DNA duplex unwinding;GO:0033567//DNA replication, Okazaki fragment processing;GO:0036297//interstrand cross-link repair;GO:0000725//recombinational repair;	GO:0005634//nucleus;GO:0016021//integral component of membrane;	GO:0005524//ATP binding;GO:0043138//3'-5' DNA helicase activity;GO:0070336//flap-structured DNA binding;	ko04139(Mitophagy - yeast)
CCM_02000	3194.59	1309.8	-1.28629	9.30589e-06	0.000573744	NW_006271970.1	-	-	sorNOG05656;opiNOG31936;sordNOG09038	SL	sp|Q920Q2|REV1_MOUSE DNA repair protein REV1 OS=Mus musculus GN=Rev1 PE=1 SV=1	Breast cancer suppressor protein BRCT, putative	18164029	-	-	-	-
CCM_02032	251.818	85.5157	-1.55812	9.76434e-06	0.000594389	NW_006271970.1	GO:0003676	-	sordNOG14668;opiNOG39293	S	-	hypothetical protein	18164061	-	-	GO:0003676//nucleic acid binding;	-
CCM_06568	5555.15	2323.72	-1.25739	1.07792e-05	0.000639964	NW_006271973.1	GO:2000251;GO:0000156;GO:0030295;GO:0004707;GO:0007234;GO:0042803;GO:0000167;GO:0010971;GO:0032872;GO:0005737;GO:0031435;GO:0031954;GO:1990315;GO:0032153	K11233	sordNOG10409;opiNOG04023	T	sp|P87323|MCS4_SCHPO Response regulator mcs4 OS=Schizosaccharomyces pombe (strain 972 / ATCC 24843) GN=mcs4 PE=4 SV=1	response regulator	18168582	GO:2000251//positive regulation of actin cytoskeleton reorganization;GO:0007234//osmosensory signaling via phosphorelay pathway;GO:0010971//positive regulation of G2/M transition of mitotic cell cycle;GO:0032872//regulation of stress-activated MAPK cascade;GO:0031954//positive regulation of protein autophosphorylation;	GO:0005737//cytoplasm;GO:1990315//Mcs4 RR-MAPKKK complex;GO:0032153//cell division site;	GO:0000156//phosphorelay response regulator activity;GO:0030295//protein kinase activator activity;GO:0004707//MAP kinase activity;GO:0042803//protein homodimerization activity;GO:0031435//mitogen-activated protein kinase kinase kinase binding;	ko04139(Mitophagy - yeast);ko04011(MAPK signaling pathway - yeast);ko02020(Two-component system)
CCM_01386	214.332	69.473	-1.62532	1.16057e-05	0.000680632	NW_006271969.1	GO:0016740	K01796	sordNOG08083;opiNOG07122	I	sp|Q8J0F0|CEFD2_ACRCH Isopenicillin N epimerase component 2 OS=Acremonium chrysogenum GN=cefD2 PE=3 SV=1	alpha-methylacyl-CoA racemase	18163417	-	-	GO:0016740//transferase activity;	ko04146(Peroxisome);ko00120(Primary bile acid biosynthesis)
CCM_09274	571.297	220.146	-1.37578	1.2186e-05	0.00071033	NW_006271976.1	GO:0005783;GO:0005635;GO:0016021	-	sordNOG12053;opiNOG01803	Q	sp|O13822|YEE6_SCHPO Uncharacterized oxidoreductase C19A8.06 OS=Schizosaccharomyces pombe (strain 972 / ATCC 24843) GN=SPAC19A8.06 PE=3 SV=1	short chain dehydrogenase/reductase family	18171277	-	GO:0005783//endoplasmic reticulum;GO:0005635//nuclear envelope;GO:0016021//integral component of membrane;	-	-
CCM_08578	2293.93	962.444	-1.25305	1.2666e-05	0.000733863	NW_006271975.1	GO:0046872;GO:0004222;GO:0006508	K13726	COG0339;opiNOG14332	EO	sp|P25375|PRTD_YEAST Saccharolysin OS=Saccharomyces cerevisiae (strain ATCC 204508 / S288c) GN=PRD1 PE=1 SV=1	metallopeptidase MepB	18170584	GO:0006508//proteolysis;	-	GO:0046872//metal ion binding;GO:0004222//metalloendopeptidase activity;	-
CCM_06855	573.422	124.309	-2.20566	1.33166e-05	0.000762378	NW_006271973.1	GO:0016021	-	opiNOG36907;opiNOG26592;opiNOG48972	S	sp|A0A0U1LQF6|CCTO_TALIS Cyclochlorotine biosynthesis protein O OS=Talaromyces islandicus GN=cctO PE=3 SV=1	hypothetical protein	18168866	-	GO:0016021//integral component of membrane;	-	-
CCM_08606	326.268	117.925	-1.46819	1.40586e-05	0.000800094	NW_006271975.1	GO:0009058;GO:0008483;GO:0030170	K00652	opiNOG06976;sordNOG11782;sorNOG07625	HE	sp|Q1DCV8|BIOF_MYXXD 8-amino-7-oxononanoate synthase OS=Myxococcus xanthus (strain DK 1622) GN=bioF PE=3 SV=1	aminotransferase, putative	18170612	GO:0009058//biosynthetic process;	-	GO:0008483//transaminase activity;GO:0030170//pyridoxal phosphate binding;	ko00780(Biotin metabolism)
CCM_07649	660.684	257.214	-1.36099	1.45511e-05	0.000823252	NW_006271974.1	GO:0016740	-	opiNOG27388;sordNOG05189	RI	sp|A8IAD8|RUTD_AZOC5 Putative aminoacrylate hydrolase RutD OS=Azorhizobium caulinodans (strain ATCC 43989 / DSM 5975 / JCM 20966 / NBRC 14845 / NCIMB 13405 / ORS 571) GN=rutD PE=3 SV=1	glycylpeptide N-tetradecanoyltransferase	18169659	-	-	GO:0016740//transferase activity;	-
CCM_09333	12077.4	5080.49	-1.24927	1.46939e-05	0.000826469	NW_006271976.1	GO:0006355;GO:0043565;GO:0003700;GO:0016787	-	opiNOG56491;eurotNOG06078;eurotNOG06429	S	-	hypothetical protein	18171336	GO:0006355//regulation of transcription, DNA-templated;	-	GO:0043565//sequence-specific DNA binding;GO:0003700//DNA-binding transcription factor activity;GO:0016787//hydrolase activity;	-
CCM_07513	160.867	34.2411	-2.23207	1.51435e-05	0.000846544	NW_006271974.1	-	-	COG2828;opiNOG21857	S	sp|Q0QLE6|MII_EUBBA 3-methylitaconate isomerase OS=Eubacterium barkeri GN=mii PE=1 SV=1	DUF453 domain protein	18169524	-	-	-	-
CCM_00869	10349.7	4393.89	-1.23602	1.58702e-05	0.00087724	NW_006271969.1	GO:0016021	-	sordNOG10795;hypNOG01272;opiNOG22300;necNOG06846	S	sp|D4AYG1|KLDC1_ARTBC Kelch repeat-containing protein ARB_01230 OS=Arthroderma benhamiae (strain ATCC MYA-4681 / CBS 112371) GN=ARB_01230 PE=1 SV=1	Galactose oxidase/kelch, beta-propeller	18162903	-	GO:0016021//integral component of membrane;	-	-
CCM_01559	1608.05	661.819	-1.2808	1.63089e-05	0.000891242	NW_006271969.1	GO:0006817;GO:0005315;GO:0016021;GO:0055085	K14640	opiNOG02222	P	sp|P15710|PHO4_NEUCR Phosphate-repressible phosphate permease pho-4 OS=Neurospora crassa (strain ATCC 24698 / 74-OR23-1A / CBS 708.71 / DSM 1257 / FGSC 987) GN=pho-4 PE=1 SV=1	sodium/phosphate symporter, putative	18163590	GO:0006817//phosphate ion transport;GO:0055085//transmembrane transport;	GO:0016021//integral component of membrane;	GO:0005315//inorganic phosphate transmembrane transporter activity;	-
CCM_02825	21078.9	8937.16	-1.23791	1.66295e-05	0.000898553	NW_006271970.1	GO:0003333;GO:0016021;GO:0015171	K16261	opiNOG07680;sordNOG09626;sorNOG00397	E	sp|P34054|INDA1_HYPAT Amino-acid permease inda1 OS=Hypocrea atroviridis GN=inda1 PE=2 SV=1	amino-acid permease inda1	18164852	GO:0003333//amino acid transmembrane transport;	GO:0016021//integral component of membrane;	GO:0015171//amino acid transmembrane transporter activity;	-
CCM_07889	2852.27	1104.6	-1.36859	1.7044e-05	0.000910719	NW_006271974.1	GO:0016021	-	opiNOG62783;necNOG08655;hypNOG08281;sordNOG14648;hypNOG13020	SR	-	hypothetical protein	18169899	-	GO:0016021//integral component of membrane;	-	-
CCM_04715	4103.43	1396.08	-1.55545	1.71722e-05	0.000912498	NW_006271971.1	GO:0016811	-	opiNOG20812;onyNOG04405	S	sp|Q9URY7|FMDA_SCHPO Putative formamidase C869.04 OS=Schizosaccharomyces pombe (strain 972 / ATCC 24843) GN=SPAC869.04 PE=3 SV=1	acetamidase/formamidase	18166736	-	-	GO:0016811//hydrolase activity, acting on carbon-nitrogen (but not peptide) bonds, in linear amides;	-
CCM_00269	174.577	55.845	-1.64437	1.74398e-05	0.000921628	NW_006271969.1	-	-	sordNOG09504;opiNOG35390	S	-	hypothetical protein	18162304	-	-	-	-
CCM_03995	575.146	229.859	-1.32318	2.01346e-05	0.00105247	NW_006271971.1	-	-	opiNOG30900;sordNOG11716	S	sp|Q04310|Y4629_STRCO Uncharacterized protein SCO4629 OS=Streptomyces coelicolor (strain ATCC BAA-471 / A3(2) / M145) GN=SCO4629 PE=4 SV=2	hypothetical protein	18166018	-	-	-	-
CCM_03015	4737.7	2017.95	-1.2313	2.02465e-05	0.0010526	NW_006271970.1	GO:0016021	-	sordNOG08899;opiNOG23073	S	-	integral membrane protein Pth11-like, putative	18165042	-	GO:0016021//integral component of membrane;	-	-
CCM_09321	3153.22	432.22	-2.86699	2.12022e-05	0.0010905	NW_006271976.1	-	-	-	-	-	hypothetical protein	18171324	-	-	-	-
CCM_00537	552.419	133.516	-2.04875	2.29948e-05	0.00117018	NW_006271969.1	GO:0016787	-	sordNOG06635;opiNOG03748	RS	sp|Q9HB07|MYG1_HUMAN UPF0160 protein MYG1, mitochondrial OS=Homo sapiens GN=C12orf10 PE=1 SV=2	MYG1 protein	18162572	-	-	GO:0016787//hydrolase activity;	-
CCM_09478	1196.29	504.543	-1.24552	2.63781e-05	0.00131453	NW_006271977.1	GO:0000329;GO:0046496;GO:0047386;GO:0006470;GO:0004035;GO:0016021	K01077	sordNOG06314	P	sp|P11491|PPB_YEAST Repressible alkaline phosphatase OS=Saccharomyces cerevisiae (strain ATCC 204508 / S288c) GN=PHO8 PE=1 SV=2	repressible alkaline phosphatase precursor	18171480	GO:0046496//nicotinamide nucleotide metabolic process;GO:0006470//protein dephosphorylation;	GO:0000329//fungal-type vacuole membrane;GO:0016021//integral component of membrane;	GO:0047386//fructose-2,6-bisphosphate 6-phosphatase activity;GO:0004035//alkaline phosphatase activity;	ko02020(Two-component system);ko00790(Folate biosynthesis);ko00730(Thiamine metabolism)
CCM_09197	117.534	5.4445	-4.43213	2.76971e-05	0.00137315	NW_006271976.1	-	-	-	-	-	hypothetical protein	18171200	-	-	-	-
CCM_04731	571.533	155.297	-1.87981	2.8957e-05	0.00142825	NW_006271971.1	GO:0016021	-	opiNOG26814;opiNOG60362	S	-	integral membrane protein, putative	18166752	-	GO:0016021//integral component of membrane;	-	-
CCM_09231	1289.92	547.799	-1.23556	3.0487e-05	0.00149604	NW_006271976.1	GO:0016042;GO:0004806	-	opiNOG54429;opiNOG35196	R	-	hypothetical protein	18171234	GO:0016042//lipid catabolic process;	-	GO:0004806//triglyceride lipase activity;	-
CCM_06078	129.102	39.3976	-1.71233	3.08481e-05	0.00150129	NW_006271972.1	GO:0055114;GO:0051213	-	-	-	-	Glyoxalase/bleomycin resistance protein/dioxygenase	18168093	GO:0055114//obsolete oxidation-reduction process;	-	GO:0051213//dioxygenase activity;	-
CCM_02394	594.608	243.123	-1.29025	3.09063e-05	0.00150129	NW_006271970.1	-	-	opiNOG40978	S	-	hypothetical protein	18164421	-	-	-	-
CCM_09403	3101.26	531.577	-2.5445	3.37637e-05	0.00159186	NW_006271977.1	GO:0016021	-	sordNOG14330	S	-	hypothetical protein	18171406	-	GO:0016021//integral component of membrane;	-	-
CCM_05381	237.22	86.3644	-1.45772	3.88748e-05	0.00181504	NW_006271972.1	-	-	sordNOG14972	S	-	hypothetical protein	18167399	-	-	-	-
CCM_01699	4822.14	2108.25	-1.19363	3.96389e-05	0.00184177	NW_006271969.1	GO:0016021	-	sordNOG06690;hypNOG01426;opiNOG24115	S	-	hypothetical protein	18163729	-	GO:0016021//integral component of membrane;	-	-
CCM_07826	533.498	217.363	-1.29538	4.27964e-05	0.00196945	NW_006271974.1	GO:0055085;GO:0016021	-	pleNOG00584;opiNOG03119	R	sp|Q870L2|MIRB_EMENI Siderophore iron transporter mirB OS=Emericella nidulans (strain FGSC A4 / ATCC 38163 / CBS 112.46 / NRRL 194 / M139) GN=mirB PE=3 SV=1	siderophore iron transporter mirB	18169836	GO:0055085//transmembrane transport;	GO:0016021//integral component of membrane;	-	-
CCM_09049	1605.56	705.489	-1.18638	4.44188e-05	0.00203438	NW_006271975.1	GO:0051666;GO:0005885;GO:0005739;GO:0006897;GO:0034314;GO:0005826;GO:0005634;GO:0003779;GO:0005829;GO:0030479;GO:0032432;GO:0051654;GO:0051286;GO:0071963	K05756	sordNOG05586;sorNOG03750;opiNOG25687	Z	sp|Q05933|ARPC3_YEAST Actin-related protein 2/3 complex subunit 3 OS=Saccharomyces cerevisiae (strain ATCC 204508 / S288c) GN=ARC18 PE=1 SV=1	ARP2/3 complex 21 kDa subunit	18171052	GO:0051666//actin cortical patch localization;GO:0006897//endocytosis;GO:0034314//Arp2/3 complex-mediated actin nucleation;GO:0051654//establishment of mitochondrion localization;GO:0071963//establishment or maintenance of cell polarity regulating cell shape;	GO:0005885//Arp2/3 protein complex;GO:0005739//mitochondrion;GO:0005826//actomyosin contractile ring;GO:0005634//nucleus;GO:0005829//cytosol;GO:0030479//actin cortical patch;GO:0032432//actin filament bundle;GO:0051286//cell tip;	GO:0003779//actin binding;	ko05135(Yersinia infection);ko05132(Salmonella infection);ko05131(Shigellosis);ko05130(Pathogenic Escherichia coli infection);ko05100(Bacterial invasion of epithelial cells);ko04810(Regulation of actin cytoskeleton);ko04666(Fc gamma R-mediated phagocytosis);ko04530(Tight junction);ko04144(Endocytosis);ko04138(Autophagy - yeast)
CCM_09684	427.007	116.095	-1.87895	4.55921e-05	0.00207822	NW_006271974.1	GO:0016773;GO:0016310;GO:0016301;GO:0005975	K00854	sordNOG08206;opiNOG03555	G	sp|B0Y4D5|XKS1_ASPFC Probable D-xylulose kinase A OS=Neosartorya fumigata (strain CEA10 / CBS 144.89 / FGSC A1163) GN=xkiA PE=2 SV=1	D-xylulose kinase	18171686	GO:0016310//phosphorylation;GO:0005975//carbohydrate metabolic process;	-	GO:0016773//phosphotransferase activity, alcohol group as acceptor;GO:0016301//kinase activity;	ko00040(Pentose and glucuronate interconversions)
CCM_04613	7974.55	3628.06	-1.1362	4.65025e-05	0.00209982	NW_006271971.1	-	-	sordNOG14390;necNOG14010;opiNOG42020;sorNOG06127	S	-	hypothetical protein	18166636	-	-	-	-
CCM_07851	262.915	97.3184	-1.43381	4.7682e-05	0.00214302	NW_006271974.1	GO:0046872;GO:0016491;GO:0055114	-	opiNOG32744;COG3491	RQ	sp|Q7LL04|YQK1_SCHPO UPF0676 protein C1494.01 OS=Schizosaccharomyces pombe (strain 972 / ATCC 24843) GN=SPCC1494.01 PE=3 SV=2	oxidoreductase	18169861	GO:0055114//obsolete oxidation-reduction process;	-	GO:0046872//metal ion binding;GO:0016491//oxidoreductase activity;	-
CCM_08162	1048.96	448.882	-1.22455	5.0253e-05	0.00224806	NW_006271974.1	GO:0005622;GO:0023014;GO:0000155;GO:0000160	-	sordNOG07767;opiNOG06478	T	sp|Q54YZ9|DHKJ_DICDI Hybrid signal transduction histidine kinase J OS=Dictyostelium discoideum GN=dhkJ PE=3 SV=2	autoinducer 2 sensor kinase/phosphatase luxQ	18170171	GO:0000160//phosphorelay signal transduction system;	GO:0005622//intracellular anatomical structure;	GO:0000155//phosphorelay sensor kinase activity;	-
CCM_01506	801.926	346.112	-1.21223	5.35138e-05	0.00238285	NW_006271969.1	GO:0009228;GO:0016310;GO:0004417;GO:0004789	K14154	sordNOG10698	H	sp|P40386|THI6_SCHPO Probable thiamine biosynthetic bifunctional enzyme OS=Schizosaccharomyces pombe (strain 972 / ATCC 24843) GN=thi4 PE=2 SV=1	thiamine-phosphate pyrophosphorylase	18163537	GO:0009228//thiamine biosynthetic process;GO:0016310//phosphorylation;	-	GO:0004417//hydroxyethylthiazole kinase activity;GO:0004789//thiamine-phosphate diphosphorylase activity;	ko00730(Thiamine metabolism)
CCM_03109	13260.5	5995.75	-1.14512	5.37776e-05	0.00238356	NW_006271970.1	GO:0055114;GO:0004497;GO:0020037;GO:0032259;GO:0016787;GO:0008168;GO:0005506;GO:0016705	-	opiNOG17632	Q	sp|P38364|PID6_FUSSO Pisatin demethylase OS=Fusarium solani subsp. pisi GN=PDA6-1 PE=3 SV=1	cytochrome P450 pisatin demethylase, putative	18165136	GO:0055114//obsolete oxidation-reduction process;GO:0032259//methylation;	-	GO:0004497//monooxygenase activity;GO:0020037//heme binding;GO:0016787//hydrolase activity;GO:0008168//methyltransferase activity;GO:0005506//iron ion binding;GO:0016705//oxidoreductase activity, acting on paired donors, with incorporation or reduction of molecular oxygen;	-
CCM_09176	295.953	114.266	-1.37298	5.6462e-05	0.00247969	NW_006271976.1	-	-	sordNOG13988;opiNOG41449	R	-	hypothetical protein	18171179	-	-	-	-
CCM_02429	530.442	221.144	-1.26221	5.8721e-05	0.00254859	NW_006271970.1	-	-	opiNOG23112	S	-	PBSP domain protein	18164456	-	-	-	-
CCM_06065	2073.76	920.835	-1.17123	5.91362e-05	0.00255055	NW_006271972.1	GO:0004499;GO:0055114;GO:0050660;GO:0050661	-	sordNOG10005;opiNOG21791	R	sp|D2E9W9|DEP4_ALTBR FAD-dependent monooxygenase DEP4 OS=Alternaria brassicicola GN=DEP4 PE=2 SV=1	hypothetical protein	18168080	GO:0055114//obsolete oxidation-reduction process;	-	GO:0004499//N,N-dimethylaniline monooxygenase activity;GO:0050660//flavin adenine dinucleotide binding;GO:0050661//NADP binding;	-
CCM_07223	206.547	75.7153	-1.44781	5.98826e-05	0.00257121	NW_006271973.1	GO:0003676	-	opiNOG30687;sordNOG05120;opiNOG38750	S	-	hypothetical protein	18169234	-	-	GO:0003676//nucleic acid binding;	-
CCM_08809	2929.63	533.645	-2.45677	6.12115e-05	0.00260624	NW_006271975.1	GO:0050662;GO:0003824	-	opiNOG06831	R	sp|P44094|DEND_HAEIN D-erythronate dehydrogenase OS=Haemophilus influenzae (strain ATCC 51907 / DSM 11121 / KW20 / Rd) GN=denD PE=1 SV=1	nucleoside-diphosphate-sugar epimerase, putative	18170814	-	-	GO:0050662//obsolete coenzyme binding;GO:0003824//catalytic activity;	-
CCM_01560	86.7629	21.205	-2.03267	6.12404e-05	0.00260624	NW_006271969.1	GO:0071949;GO:0055114;GO:0004497	-	opiNOG71163;COG0654;opiNOG24211;opiNOG02763	HSC	sp|A0A0U1LQD9|CCTM_TALIS FAD-dependent monooxygenase cctM OS=Talaromyces islandicus GN=cctM PE=3 SV=1	FAD-dependent monooxygenase	18163591	GO:0055114//obsolete oxidation-reduction process;	-	GO:0071949//FAD binding;GO:0004497//monooxygenase activity;	-
CCM_09507	225.154	83.0859	-1.43824	6.23421e-05	0.00262985	NW_006271977.1	GO:0055114;GO:0018580;GO:0051213	-	opiNOG23312;sorNOG01082;sordNOG09603	SR	sp|O06179|Y1533_MYCTU Putative monooxygenase Rv1533 OS=Mycobacterium tuberculosis (strain ATCC 25618 / H37Rv) GN=Rv1533 PE=1 SV=1	oxidoreductase, 2-nitropropane dioxygenase family, putative	18171509	GO:0055114//obsolete oxidation-reduction process;	-	GO:0018580//nitronate monooxygenase activity;GO:0051213//dioxygenase activity;	-
CCM_02510	198.502	72.8632	-1.44589	6.84539e-05	0.00286256	NW_006271970.1	-	K05302	sordNOG15519;opiNOG17905	S	sp|Q12504|RKM4_YEAST Ribosomal lysine N-methyltransferase 4 OS=Saccharomyces cerevisiae (strain ATCC 204508 / S288c) GN=RKM4 PE=1 SV=1	SET domain-containing protein RMS1	18164537	-	-	-	-
CCM_02901	472.874	195.495	-1.27432	6.98884e-05	0.00289735	NW_006271970.1	GO:0016787	K01050	sordNOG07777	T	sp|P04058|ACES_TETCF Acetylcholinesterase OS=Tetronarce californica GN=ache PE=1 SV=2	carboxylesterase, putative	18164928	-	-	GO:0016787//hydrolase activity;	-
CCM_01983	252.62	97.2813	-1.37673	7.46191e-05	0.00305398	NW_006271970.1	GO:0006520;GO:0030170	K01754	sordNOG04083;opiNOG04263	E	sp|A2XWA9|SRR_ORYSI Serine racemase OS=Oryza sativa subsp. indica GN=OsI_16936 PE=3 SV=1	Pyridoxal-phosphate dependent enzyme, putative	18164012	GO:0006520//cellular amino acid metabolic process;	-	GO:0030170//pyridoxal phosphate binding;	ko00290(Valine, leucine and isoleucine biosynthesis);ko00260(Glycine, serine and threonine metabolism)
CCM_01406	449.811	188.719	-1.25308	7.57719e-05	0.00308802	NW_006271969.1	GO:0003676	-	sordNOG06290	R	sp|Q2KI19|GPT11_BOVIN G patch domain-containing protein 11 OS=Bos taurus GN=GPATCH11 PE=2 SV=2	G-patch domain protein, putative	18163437	-	-	GO:0003676//nucleic acid binding;	-
CCM_09464	978.521	429.067	-1.1894	7.62511e-05	0.00309444	NW_006271977.1	-	K12188	opiNOG03162;sordNOG08912	K	sp|Q5RJU0|SNF8_XENTR Vacuolar-sorting protein SNF8 OS=Xenopus tropicalis GN=snf8 PE=2 SV=1	ELL complex subunit Eap30, putative	18171466	-	-	-	ko04144(Endocytosis)
CCM_08393	1032.56	349.538	-1.56271	7.71564e-05	0.00311516	NW_006271975.1	-	-	sordNOG08482	S	-	hypothetical protein	18170401	-	-	-	-
CCM_08058	3581.23	1627.23	-1.13804	7.74094e-05	0.00311516	NW_006271974.1	-	-	opiNOG63145	S	-	hypothetical protein	18170067	-	-	-	-
CCM_05140	397.334	162.931	-1.28609	7.84701e-05	0.00314469	NW_006271972.1	GO:0031966	K15326	sordNOG06120	J	sp|Q7SC91|SEN54_NEUCR Probable tRNA-splicing endonuclease subunit tsp-5 OS=Neurospora crassa (strain ATCC 24698 / 74-OR23-1A / CBS 708.71 / DSM 1257 / FGSC 987) GN=tsp-5 PE=3 SV=2	hypothetical protein	18167159	-	GO:0031966//mitochondrial membrane;	-	-
CCM_02325	1125.1	504.788	-1.1563	8.09603e-05	0.00321378	NW_006271970.1	-	-	opiNOG33721;sordNOG11219	S	-	hypothetical protein	18164352	-	-	-	-
CCM_06852	70.0653	16.3385	-2.10043	8.11161e-05	0.00321378	NW_006271973.1	-	-	-	-	-	hypothetical protein	18168863	-	-	-	-
CCM_01073	609.935	260.815	-1.22563	8.11965e-05	0.00321378	NW_006271969.1	-	-	opiNOG22578;sordNOG08006	S	-	hypothetical protein	18163106	-	-	-	-
CCM_08576	497.373	151.314	-1.71678	9.42551e-05	0.00365543	NW_006271975.1	GO:0005759;GO:0034553	-	sordNOG14335;opiNOG41540	S	sp|P38345|SDHF4_YEAST Succinate dehydrogenase assembly factor 4, mitochondrial OS=Saccharomyces cerevisiae (strain ATCC 204508 / S288c) GN=SDH8 PE=1 SV=2	FMP21-like protein	18170582	GO:0034553//mitochondrial respiratory chain complex II assembly;	GO:0005759//mitochondrial matrix;	-	-
CCM_06363	70.6957	17.7428	-1.99439	9.95008e-05	0.00381275	NW_006271972.1	-	K18337	sordNOG04804;opiNOG11474	Q	sp|A3LZU7|RM1DH_PICST L-rhamnose-1-dehydrogenase OS=Scheffersomyces stipitis (strain ATCC 58785 / CBS 6054 / NBRC 10063 / NRRL Y-11545) GN=DHG2 PE=1 SV=2	Short-chain dehydrogenase/reductase SDR	18168377	-	-	-	ko00051(Fructose and mannose metabolism)
CCM_07345	181.358	65.9257	-1.45993	0.000101032	0.00385604	NW_006271974.1	GO:0005737;GO:0007020;GO:0005874;GO:0005815;GO:0043015;GO:0000922	-	sordNOG09171	S	-	gamma-tubulin complex component GCP4, putative	18169356	GO:0007020//microtubule nucleation;	GO:0005737//cytoplasm;GO:0005874//microtubule;GO:0005815//microtubule organizing center;GO:0000922//spindle pole;	GO:0043015//gamma-tubulin binding;	-
CCM_04233	951.39	423.48	-1.16774	0.000108752	0.00410189	NW_006271971.1	-	-	sorNOG08510;sordNOG14877	R	-	hypothetical protein	18166256	-	-	-	-
CCM_08211	241.59	94.7692	-1.35007	0.000120491	0.00452688	NW_006271974.1	GO:0055114;GO:0016491;GO:0071949	K00480	sordNOG09357;opiNOG00334	CR	sp|B6D1N4|HPXO_KLEPN FAD-dependent urate hydroxylase OS=Klebsiella pneumoniae GN=hpxO PE=3 SV=1	salicylate hydroxylase, putative	18170219	GO:0055114//obsolete oxidation-reduction process;	-	GO:0016491//oxidoreductase activity;GO:0071949//FAD binding;	ko00626(Naphthalene degradation);ko00624(Polycyclic aromatic hydrocarbon degradation);ko00621(Dioxin degradation)
CCM_04220	4454.27	2122.54	-1.0694	0.00013601	0.00495511	NW_006271971.1	GO:0016021	-	opiNOG57336;sordNOG08554;opiNOG24886	R	-	hypothetical protein	18166243	-	GO:0016021//integral component of membrane;	-	-
CCM_00997	260.719	102.738	-1.34353	0.000139985	0.00505836	NW_006271969.1	GO:0016021	-	hypNOG02195;sordNOG14516;necNOG04722	S	-	hypothetical protein	18163030	-	GO:0016021//integral component of membrane;	-	-
CCM_09069	1159.42	537.458	-1.10918	0.000140422	0.00505836	NW_006271975.1	GO:0005634;GO:0005829	K12274	opiNOG27256;sordNOG04284	S	sp|O14085|SEC72_SCHPO Translocation protein sec72 OS=Schizosaccharomyces pombe (strain 972 / ATCC 24843) GN=sec72 PE=3 SV=1	tetratricopeptide repeat domain containing protein	18171072	-	GO:0005634//nucleus;GO:0005829//cytosol;	-	-
CCM_03083	1458.13	396.839	-1.8775	0.000144117	0.00517209	NW_006271970.1	GO:0050660;GO:0055114;GO:0003885;GO:0016020	-	opiNOG23046;sordNOG07494	S	-	putative oxidoreductase	18165110	GO:0055114//obsolete oxidation-reduction process;	GO:0016020//membrane;	GO:0050660//flavin adenine dinucleotide binding;GO:0003885//D-arabinono-1,4-lactone oxidase activity;	-
CCM_05093	291.891	120.19	-1.28011	0.000147194	0.00524336	NW_006271972.1	-	-	sordNOG13836;sordNOG14397	S	-	hypothetical protein	18167113	-	-	-	-
CCM_07152	1105.66	506.513	-1.12624	0.000149333	0.00529995	NW_006271973.1	GO:0006468;GO:0004672;GO:0005524	-	hypNOG11314;opiNOG60669;opiNOG66313;sordNOG14195	T	sp|P38147|CHK1_YEAST Serine/threonine-protein kinase CHK1 OS=Saccharomyces cerevisiae (strain ATCC 204508 / S288c) GN=CHK1 PE=1 SV=1	Protein kinase-like domain	18169163	GO:0006468//protein phosphorylation;	-	GO:0004672//protein kinase activity;GO:0005524//ATP binding;	-
CCM_00954	1546.17	728.47	-1.08575	0.000168062	0.00589177	NW_006271969.1	GO:0004647;GO:0016311;GO:0006564	K01079	sordNOG07018	E	sp|Q9S281|SERB_STRCO Phosphoserine phosphatase OS=Streptomyces coelicolor (strain ATCC BAA-471 / A3(2) / M145) GN=SCO1808 PE=1 SV=1	phosphoserine phosphatase	18162987	GO:0016311//dephosphorylation;GO:0006564//L-serine biosynthetic process;	-	-	ko00680(Methane metabolism);ko00260(Glycine, serine and threonine metabolism)
CCM_06127	3656.22	1738.57	-1.07246	0.000168459	0.00589177	NW_006271972.1	GO:0005737;GO:0004414;GO:0009086	-	sordNOG04755;opiNOG16886	RE	sp|Q4QJY8|METXA_HAEI8 Homoserine O-acetyltransferase OS=Haemophilus influenzae (strain 86-028NP) GN=metXA PE=3 SV=1	homoserine acetyltransferase family protein	18168142	GO:0009086//methionine biosynthetic process;	GO:0005737//cytoplasm;	GO:0004414//homoserine O-acetyltransferase activity;	-
CCM_01141	352.784	150.691	-1.2272	0.000171099	0.0059409	NW_006271969.1	GO:0009435;GO:0000309;GO:0005524	K06210	opiNOG17277;COG1057;sorNOG03390	H	sp|P53204|NMA2_YEAST Nicotinamide/nicotinic acid mononucleotide adenylyltransferase 2 OS=Saccharomyces cerevisiae (strain ATCC 204508 / S288c) GN=NMA2 PE=1 SV=1	nicotinamide-nucleotide adenylyltransferase 2	18163173	GO:0009435//NAD biosynthetic process;	-	GO:0000309//nicotinamide-nucleotide adenylyltransferase activity;GO:0005524//ATP binding;	ko00760(Nicotinate and nicotinamide metabolism)
CCM_03311	676.133	301.615	-1.1646	0.000173904	0.00601657	NW_006271970.1	GO:0016021;GO:0006506;GO:0017176;GO:0000506	K03859	opiNOG16310;sordNOG06753	I	sp|O59802|GPI2_SCHPO Phosphatidylinositol N-acetylglucosaminyltransferase GPI2 subunit OS=Schizosaccharomyces pombe (strain 972 / ATCC 24843) GN=gpi2 PE=3 SV=1	phosphatidylinositol:UDP-GlcNAc transferase PIG-C	18165337	GO:0006506//GPI anchor biosynthetic process;	GO:0016021//integral component of membrane;GO:0000506//glycosylphosphatidylinositol-N-acetylglucosaminyltransferase (GPI-GnT) complex;	GO:0017176//phosphatidylinositol N-acetylglucosaminyltransferase activity;	ko00563(Glycosylphosphatidylinositol (GPI)-anchor biosynthesis)
CCM_06563	1618.55	762.897	-1.08514	0.000179835	0.0061705	NW_006271973.1	GO:0008152;GO:0016787	-	pleNOG05600;sordNOG10785;opiNOG17732	S	sp|A0A1B4XBK2|SDNM_SORAA Transcriptional regulator sdnM OS=Sordaria araneosa GN=sdnM PE=4 SV=1	alpha/beta hydrolase fold-3	18168577	GO:0008152//metabolic process;	-	GO:0016787//hydrolase activity;	-
CCM_00350	262.636	108.766	-1.27183	0.000180278	0.0061705	NW_006271969.1	GO:0006506;GO:0097502;GO:0016021;GO:0004584	K07542	opiNOG07569;sordNOG11222	G	sp|Q4I0K3|GPI18_GIBZE GPI mannosyltransferase 2 OS=Gibberella zeae (strain PH-1 / ATCC MYA-4620 / FGSC 9075 / NRRL 31084) GN=GPI18 PE=3 SV=1	DUF409 domain protein	18162385	GO:0006506//GPI anchor biosynthetic process;GO:0097502//mannosylation;	GO:0016021//integral component of membrane;	GO:0004584//obsolete dolichyl-phosphate-mannose-glycolipid alpha-mannosyltransferase activity;	ko00563(Glycosylphosphatidylinositol (GPI)-anchor biosynthesis)
CCM_00871	150901	44646.2	-1.75699	0.000186513	0.00636127	NW_006271969.1	-	-	-	-	-	hypothetical protein	18162905	-	-	-	-
CCM_01530	11459.3	5451.01	-1.07192	0.000189262	0.00643222	NW_006271969.1	GO:0005506;GO:0020037;GO:0016705;GO:0016020;GO:0055114;GO:0004497	-	opiNOG06557;opiNOG55464	Q	sp|Q4WAZ6|FMAG_ASPFU Multifunctional cytochrome P450 monooxygenase af510 OS=Neosartorya fumigata (strain ATCC MYA-4609 / Af293 / CBS 101355 / FGSC A1100) GN=af510 PE=1 SV=1	cytochrome P450 oxidoreductase OrdA-like protein	18163561	GO:0055114//obsolete oxidation-reduction process;	GO:0016020//membrane;	GO:0005506//iron ion binding;GO:0020037//heme binding;GO:0016705//oxidoreductase activity, acting on paired donors, with incorporation or reduction of molecular oxygen;GO:0004497//monooxygenase activity;	-
CCM_01454	649.705	290.893	-1.1593	0.000199539	0.0067034	NW_006271969.1	GO:0016810	K01487	sordNOG10862;sorNOG00499;opiNOG00968	F	sp|O14057|GUAD_SCHPO Probable guanine deaminase OS=Schizosaccharomyces pombe (strain 972 / ATCC 24843) GN=SPCC1672.03c PE=3 SV=1	Guanine deaminase	18163485	-	-	GO:0016810//hydrolase activity, acting on carbon-nitrogen (but not peptide) bonds;	ko00230(Purine metabolism)
CCM_00960	325.714	138.931	-1.22923	0.000200029	0.0067034	NW_006271969.1	GO:0005829;GO:0005634;GO:0031591;GO:0030488;GO:0008175	K15450	opiNOG04009	S	sp|P53177|TYW3_YEAST tRNA wybutosine-synthesizing protein 3 OS=Saccharomyces cerevisiae (strain ATCC 204508 / S288c) GN=TYW3 PE=1 SV=1	tRNA wybutosine-synthesizing protein	18162993	GO:0031591//wybutosine biosynthetic process;GO:0030488//tRNA methylation;	GO:0005829//cytosol;GO:0005634//nucleus;	GO:0008175//tRNA methyltransferase activity;	-
CCM_08457	17714.9	6295.4	-1.49259	0.000207289	0.00690932	NW_006271975.1	GO:0003677;GO:0009439;GO:0008824	K01725	sordNOG12848;opiNOG29380	E	sp|D1ZHN6|CYNS_SORMK Cyanate hydratase OS=Sordaria macrospora (strain ATCC MYA-333 / DSM 997 / K(L3346) / K-hell) GN=CYN1 PE=1 SV=2	cyanate hydratase, putative	18170464	GO:0009439//cyanate metabolic process;	-	GO:0003677//DNA binding;GO:0008824//cyanate hydratase activity;	ko00910(Nitrogen metabolism)
CCM_07980	823.582	250.853	-1.71507	0.000223452	0.00738542	NW_006271974.1	GO:0016787;GO:0055085;GO:0022891;GO:0016021	-	opiNOG00758;euNOG37502;eurotNOG05696	R	sp|P07921|LACP_KLULA Lactose permease OS=Kluyveromyces lactis (strain ATCC 8585 / CBS 2359 / DSM 70799 / NBRC 1267 / NRRL Y-1140 / WM37) GN=LAC12 PE=3 SV=1	MFS monosaccharide transporter, putative	18169990	GO:0055085//transmembrane transport;	GO:0016021//integral component of membrane;	GO:0016787//hydrolase activity;	-
CCM_00516	1235.31	584.418	-1.0798	0.000230883	0.00760492	NW_006271969.1	-	-	sordNOG14628	R	-	Tetratricopeptide-like helical	18162551	-	-	-	-
CCM_00628	248.498	100.132	-1.31133	0.000232645	0.00763679	NW_006271969.1	GO:0050113;GO:0019310;GO:0055114;GO:0005737;GO:0005506	K00469	sordNOG07773;opiNOG06092	R	sp|Q9QXN5|MIOX_MOUSE Inositol oxygenase OS=Mus musculus GN=Miox PE=1 SV=2	inositol oxygenase	18162663	GO:0019310//inositol catabolic process;GO:0055114//obsolete oxidation-reduction process;	GO:0005737//cytoplasm;	GO:0050113//inositol oxygenase activity;GO:0005506//iron ion binding;	ko00562(Inositol phosphate metabolism);ko00053(Ascorbate and aldarate metabolism)
CCM_00492	1055.13	321.325	-1.71532	0.000233485	0.00763829	NW_006271969.1	GO:0055085;GO:0016021	-	KOG3098;fuNOG23719;eurotNOG00684;opiNOG70024;opiNOG70343	S	sp|Q9URX1|YLX5_SCHPO UNC93-like protein C922.05c OS=Schizosaccharomyces pombe (strain 972 / ATCC 24843) GN=SPAC922.05c PE=3 SV=1	MFS transporter, putative	18162527	GO:0055085//transmembrane transport;	GO:0016021//integral component of membrane;	-	-
CCM_05245	164.721	62.6132	-1.39548	0.000244889	0.00798188	NW_006271972.1	GO:0016742;GO:0009058	-	opiNOG15036	I	sp|P31907|HOXX_BRADU Hydrogenase maturation factor HoxX OS=Bradyrhizobium diazoefficiens (strain JCM 10833 / IAM 13628 / NBRC 14792 / USDA 110) GN=hoxX PE=4 SV=2	formyl transferase domain-containing protein	18167264	GO:0009058//biosynthetic process;	-	GO:0016742//hydroxymethyl-, formyl- and related transferase activity;	-
CCM_04598	4466.38	2161.34	-1.04718	0.000251909	0.00810321	NW_006271971.1	GO:0032259;GO:0051213;GO:0008168;GO:0055114	-	opiNOG18687;sordNOG06563	SR	-	phytanoyl-CoA dioxygenase family protein	18166621	GO:0032259//methylation;GO:0055114//obsolete oxidation-reduction process;	-	GO:0051213//dioxygenase activity;GO:0008168//methyltransferase activity;	-
CCM_06333	31561.7	15173.4	-1.05663	0.000266208	0.00850628	NW_006271972.1	-	-	sordNOG14094;opiNOG38256	S	-	hypothetical protein	18168347	-	-	-	-
CCM_08940	190.812	74.8617	-1.34985	0.000270109	0.00860234	NW_006271975.1	GO:0016021	K07034	sordNOG13278;opiNOG31022	S	sp|Q460G9|ALCS_EMENI Protein alcS OS=Emericella nidulans (strain FGSC A4 / ATCC 38163 / CBS 112.46 / NRRL 194 / M139) GN=alcS PE=2 SV=1	plasma membrane ammonium transporter (Ato3)	18170945	-	GO:0016021//integral component of membrane;	-	-
CCM_00191	369.789	164.283	-1.17052	0.000273087	0.00863996	NW_006271969.1	GO:0016310;GO:0004143;GO:0006654;GO:0016779;GO:0030176	K16368	opiNOG18419;sordNOG08437;sorNOG03034	I	sp|Q12382|DGK1_YEAST CTP-dependent diacylglycerol kinase 1 OS=Saccharomyces cerevisiae (strain ATCC 204508 / S288c) GN=DGK1 PE=1 SV=1	phosphatidate cytidylyltransferase, putative	18162226	GO:0016310//phosphorylation;GO:0006654//phosphatidic acid biosynthetic process;	GO:0030176//integral component of endoplasmic reticulum membrane;	GO:0004143//diacylglycerol kinase activity;GO:0016779//nucleotidyltransferase activity;	ko00564(Glycerophospholipid metabolism)
CCM_01277	1525.43	627.765	-1.28092	0.000274568	0.00865834	NW_006271969.1	GO:0005509;GO:0004571;GO:0008152;GO:0016021	K01230	sordNOG04420;sorNOG04347;opiNOG23201	G	sp|P39098|MA1A2_MOUSE Mannosyl-oligosaccharide 1,2-alpha-mannosidase IB OS=Mus musculus GN=Man1a2 PE=1 SV=1	class I alpha-mannosidase	18163308	GO:0008152//metabolic process;	GO:0016021//integral component of membrane;	GO:0005509//calcium ion binding;GO:0004571//mannosyl-oligosaccharide 1,2-alpha-mannosidase activity;	ko04141(Protein processing in endoplasmic reticulum);ko00513(Various types of N-glycan biosynthesis);ko00510(N-Glycan biosynthesis)
CCM_09331	5877.4	2835.98	-1.05133	0.000286163	0.0089652	NW_006271976.1	-	-	eurotNOG08598	S	-	hypothetical protein	18171334	-	-	-	-
CCM_01898	2529.1	1077.55	-1.23086	0.000287438	0.00897591	NW_006271969.1	GO:0008168;GO:0032259	-	opiNOG09480;sorNOG07370	R	sp|M2SNN6|LAEA_COCH5 Secondary metabolism regulator LAE1 OS=Cochliobolus heterostrophus (strain C5 / ATCC 48332 / race O) GN=LAE1 PE=3 SV=1	hypothetical protein	18163927	GO:0032259//methylation;	-	GO:0008168//methyltransferase activity;	-
CCM_09498	28508.7	6611.32	-2.10839	0.000289722	0.00901794	NW_006271977.1	GO:0016021;GO:0097264	-	COG3209;opiNOG12837	MS	-	RHS Repeat protein	18171500	GO:0097264//self proteolysis;	GO:0016021//integral component of membrane;	-	-
CCM_04626	1699.36	814.002	-1.06189	0.000292884	0.00905931	NW_006271971.1	GO:0005622;GO:0006886	K20524	opiNOG06150;sordNOG05298	U	sp|P87308|LSB5_SCHPO Protein lsb5 OS=Schizosaccharomyces pombe (strain 972 / ATCC 24843) GN=lsb5 PE=3 SV=1	VHS domain protein	18166648	GO:0006886//intracellular protein transport;	GO:0005622//intracellular anatomical structure;	-	-
CCM_05644	752.284	348.434	-1.11039	0.000292935	0.00905931	NW_006271972.1	GO:0007166;GO:0016021;GO:0004888	-	opiNOG02463;opiNOG16108;opiNOG70012;NOG42303	ST	-	cAMP receptor-like protein, putative	18167662	GO:0007166//cell surface receptor signaling pathway;	GO:0016021//integral component of membrane;	GO:0004888//transmembrane signaling receptor activity;	-
CCM_07799	1059.14	509.043	-1.05704	0.000307968	0.00946336	NW_006271974.1	-	-	sordNOG14755;opiNOG48938	S	sp|Q8S8S9|MES1_ARATH Methylesterase 1 OS=Arabidopsis thaliana GN=MES1 PE=1 SV=1	hypothetical protein	18169809	-	-	-	-
CCM_02918	1141.52	553.206	-1.04506	0.000331835	0.010132	NW_006271970.1	GO:0016787	K01424	sordNOG10289;sorNOG02998;opiNOG23461	E	sp|Q7CQV5|IAAA_SALTY Isoaspartyl peptidase OS=Salmonella typhimurium (strain LT2 / SGSC1412 / ATCC 700720) GN=iaaA PE=1 SV=1	L-asparaginase precursor	18164945	-	-	GO:0016787//hydrolase activity;	ko00460(Cyanoamino acid metabolism);ko00250(Alanine, aspartate and glutamate metabolism)
CCM_06936	6816.74	3326.65	-1.03501	0.000340363	0.0103595	NW_006271973.1	GO:0016021	-	onyNOG05729;opiNOG48182	S	-	hypothetical protein	18168947	-	GO:0016021//integral component of membrane;	-	-
CCM_01890	2355.85	656.537	-1.8433	0.000345368	0.0104787	NW_006271969.1	GO:0055114;GO:0016491	-	COG0665;opiNOG14000	E	sp|P40859|MSOX_BACB0 Monomeric sarcosine oxidase OS=Bacillus sp. (strain B-0618) GN=soxA PE=1 SV=2	FAD dependent oxidoreductase	18163919	GO:0055114//obsolete oxidation-reduction process;	-	GO:0016491//oxidoreductase activity;	-
CCM_09496	6557.2	1862.6	-1.81577	0.000356914	0.0106968	NW_006271977.1	-	-	-	-	-	hypothetical protein	18171498	-	-	-	-
CCM_06769	6236.85	1732.43	-1.84802	0.000358178	0.0106968	NW_006271973.1	GO:0055114;GO:0004497	-	opiNOG51951	R	sp|D2E9W9|DEP4_ALTBR FAD-dependent monooxygenase DEP4 OS=Alternaria brassicicola GN=DEP4 PE=2 SV=1	dimethylaniline monooxygenase, putative	18168782	GO:0055114//obsolete oxidation-reduction process;	-	GO:0004497//monooxygenase activity;	-
CCM_01875	1267.64	579.353	-1.12963	0.000359317	0.0106968	NW_006271969.1	-	-	sordNOG10220;opiNOG02879	S	-	von Willebrand factor, type A	18163904	-	-	-	-
CCM_07037	918.792	438.157	-1.06829	0.000363067	0.0107446	NW_006271973.1	GO:0006694;GO:0016853;GO:0055114;GO:0003854	K07748	opiNOG01836	G	sp|P53199|ERG26_YEAST Sterol-4-alpha-carboxylate 3-dehydrogenase, decarboxylating OS=Saccharomyces cerevisiae (strain ATCC 204508 / S288c) GN=ERG26 PE=1 SV=1	C-3 sterol dehydrogenase/C-4 decarboxylase family protein	18169048	GO:0006694//steroid biosynthetic process;GO:0055114//obsolete oxidation-reduction process;	-	GO:0016853//isomerase activity;GO:0003854//3-beta-hydroxy-delta5-steroid dehydrogenase activity;	ko00100(Steroid biosynthesis)
CCM_04912	219.763	24.5204	-3.16389	0.000373595	0.0109885	NW_006271971.1	GO:0016021	-	opiNOG42892;sordNOG12565	S	-	hypothetical protein	18166933	-	GO:0016021//integral component of membrane;	-	-
CCM_00204	493.505	228.001	-1.11403	0.000382916	0.011175	NW_006271969.1	GO:0006508;GO:0004190	-	COG0666;opiNOG57695;opiNOG10889	RM	sp|Q00808|HETE1_PODAS Vegetative incompatibility protein HET-E-1 OS=Podospora anserina GN=HET-E1 PE=4 SV=1	ankyrin 2,3/unc44, putative	18162239	GO:0006508//proteolysis;	-	GO:0004190//aspartic-type endopeptidase activity;	-
CCM_07934	11848.4	4100.76	-1.53073	0.000383422	0.011175	NW_006271974.1	GO:0016021;GO:0055085	K03448	opiNOG17144	G	sp|O43000|LIZ1_SCHPO Pantothenate transporter liz1 OS=Schizosaccharomyces pombe (strain 972 / ATCC 24843) GN=liz1 PE=2 SV=2	pantothenate transporter, putative	18169944	GO:0055085//transmembrane transport;	GO:0016021//integral component of membrane;	-	-
CCM_04642	5167.39	2012.94	-1.36013	0.000402787	0.0117039	NW_006271971.1	GO:0016021	-	opiNOG24326	S	-	hypothetical protein	18166664	-	GO:0016021//integral component of membrane;	-	-
CCM_09512	1399.64	682.125	-1.03694	0.000405487	0.0117116	NW_006271977.1	GO:0016614;GO:0055114;GO:0050660	K17066	opiNOG11247;sordNOG11016;opiNOG13336	R	sp|Q00922|ALOX_CANBO Alcohol oxidase OS=Candida boidinii GN=AOD1 PE=1 SV=1	alcohol dehydrogenase	18171514	GO:0055114//obsolete oxidation-reduction process;	-	GO:0016614//oxidoreductase activity, acting on CH-OH group of donors;GO:0050660//flavin adenine dinucleotide binding;	ko00680(Methane metabolism)
CCM_06510	1582.96	771.923	-1.0361	0.000422144	0.0120839	NW_006271973.1	GO:0016301;GO:0016310	-	pleNOG06185;opiNOG32515	R	-	Protein kinase-like domain	18168524	GO:0016310//phosphorylation;	-	GO:0016301//kinase activity;	-
CCM_08403	143.616	55.455	-1.37283	0.000425476	0.0121118	NW_006271975.1	-	-	sordNOG09882	S	-	hypothetical protein	18170411	-	-	-	-
CCM_03728	247.152	105.744	-1.22483	0.000445921	0.0126143	NW_006271971.1	-	-	sordNOG15808;opiNOG57457	S	-	hypothetical protein	18165751	-	-	-	-
CCM_06413	504.123	234.463	-1.10441	0.000477198	0.013381	NW_006271973.1	GO:0051082;GO:0005743;GO:0009060;GO:0016021;GO:0033617	K14998	opiNOG07475;sordNOG06705	C	sp|Q9Y810|SHY1_SCHPO Cytochrome oxidase assembly protein shy1 OS=Schizosaccharomyces pombe (strain 972 / ATCC 24843) GN=shy1 PE=3 SV=1	COX1 assembly protein Shy1, putative	18168427	GO:0009060//aerobic respiration;GO:0033617//mitochondrial cytochrome c oxidase assembly;	GO:0005743//mitochondrial inner membrane;GO:0016021//integral component of membrane;	GO:0051082//unfolded protein binding;	-
CCM_02334	101.971	35.6406	-1.51657	0.000479186	0.0133977	NW_006271970.1	-	-	opiNOG15535;sordNOG11112	S	sp|Q0VCN1|NMRL1_BOVIN NmrA-like family domain-containing protein 1 OS=Bos taurus GN=NMRAL1 PE=2 SV=1	NmrA family protein	18164361	-	-	-	-
CCM_04614	1724.56	843.937	-1.03102	0.000503121	0.0137527	NW_006271971.1	-	K12349	opiNOG00423;sordNOG07248;sorNOG01181	T	sp|F4HQM3|NCER1_ARATH Neutral ceramidase 1 OS=Arabidopsis thaliana GN=NCER1 PE=2 SV=1	neutral ceramidase precursor	18166637	-	-	-	ko04071(Sphingolipid signaling pathway);ko00600(Sphingolipid metabolism)
CCM_03226	39.9191	8.13308	-2.2952	0.000507866	0.0138095	NW_006271970.1	GO:0006469;GO:0006521;GO:0004860;GO:0043022;GO:0003785	-	sordNOG04775;opiNOG24335	S	sp|P25637|YIH1_YEAST Protein IMPACT homolog OS=Saccharomyces cerevisiae (strain ATCC 204508 / S288c) GN=YIH1 PE=1 SV=1	impact family protein	18165252	GO:0006469//negative regulation of protein kinase activity;GO:0006521//regulation of cellular amino acid metabolic process;	-	GO:0004860//protein kinase inhibitor activity;GO:0043022//ribosome binding;GO:0003785//actin monomer binding;	-
CCM_06416	569.539	255.081	-1.15884	0.000542758	0.0145817	NW_006271973.1	GO:0016021	-	-	-	-	hypothetical protein	18168430	-	GO:0016021//integral component of membrane;	-	-
CCM_00286	1536.83	765.349	-1.00577	0.000579945	0.0153239	NW_006271969.1	-	-	sordNOG08288	R	-	Kelch repeat type 1	18162321	-	-	-	-
CCM_04705	1149.64	565.249	-1.02423	0.000587838	0.0154431	NW_006271971.1	-	-	sordNOG05605;opiNOG01863;opiNOG35299	SR	sp|D4B0N9|6PGL_ARTBC Probable 6-phosphogluconolactonase ARB_02015 OS=Arthroderma benhamiae (strain ATCC MYA-4681 / CBS 112371) GN=ARB_02015 PE=1 SV=1	3-carboxymuconate cyclase	18166727	-	-	-	-
CCM_08353	934.901	339.6	-1.46098	0.000592198	0.0154431	NW_006271975.1	GO:0016884	K01426	opiNOG01013;sordNOG10979	TIJ	sp|O59805|YJV7_SCHPO Putative amidase C550.07 OS=Schizosaccharomyces pombe (strain 972 / ATCC 24843) GN=SPCC550.07 PE=3 SV=1	amidase, putative	18170361	-	-	GO:0016884//carbon-nitrogen ligase activity, with glutamine as amido-N-donor;	ko00643(Styrene degradation);ko00627(Aminobenzoate degradation);ko00380(Tryptophan metabolism);ko00360(Phenylalanine metabolism);ko00330(Arginine and proline metabolism)
CCM_04260	870.641	426.251	-1.03038	0.000592641	0.0154431	NW_006271971.1	GO:0031011;GO:0006338;GO:0005737;GO:0051983;GO:0006355	K11667	sordNOG12113	S	sp|Q9UTE8|IES6_SCHPO Chromatin-remodeling complex subunit ies6 OS=Schizosaccharomyces pombe (strain 972 / ATCC 24843) GN=ies6 PE=3 SV=1	YL1 nuclear	18166283	GO:0006338//chromatin remodeling;GO:0051983//regulation of chromosome segregation;GO:0006355//regulation of transcription, DNA-templated;	GO:0031011//Ino80 complex;GO:0005737//cytoplasm;	-	-
CCM_01070	342.151	156.312	-1.13021	0.00059581	0.0154461	NW_006271969.1	-	-	opiNOG60562;opiNOG59471	S	-	hypothetical protein	18163103	-	-	-	-
CCM_00803	55.6069	15.0326	-1.88717	0.00062639	0.0161086	NW_006271969.1	GO:0000981;GO:0005634;GO:0008270;GO:0006357	-	opiNOG18313;sacNOG05611;opiNOG15410	SK	sp|Q08904|RDR1_YEAST Protein RDR1 OS=Saccharomyces cerevisiae (strain ATCC 204508 / S288c) GN=RDR1 PE=4 SV=1	transcriptional repressor involved in the control of multidrug resistance	18162837	GO:0006357//regulation of transcription by RNA polymerase II;	GO:0005634//nucleus;	GO:0000981//DNA-binding transcription factor activity, RNA polymerase II-specific;GO:0008270//zinc ion binding;	-
CCM_00886	280.832	124.886	-1.16909	0.000649142	0.0166049	NW_006271969.1	GO:0042254;GO:0001522	K14763	sordNOG05149	S	sp|O14360|NAF1_SCHPO H/ACA ribonucleoprotein complex non-core subunit NAF1 OS=Schizosaccharomyces pombe (strain 972 / ATCC 24843) GN=naf1 PE=1 SV=1	snoRNP assembly factor Naf1, putative	18162920	GO:0042254//ribosome biogenesis;GO:0001522//pseudouridine synthesis;	-	-	-
CCM_07549	368.338	170.51	-1.11117	0.000685318	0.0173458	NW_006271974.1	-	-	sordNOG12198	A	sp|Q52E73|SPP2_MAGO7 Pre-mRNA-splicing factor SPP2 OS=Magnaporthe oryzae (strain 70-15 / ATCC MYA-4617 / FGSC 8958) GN=SPP2 PE=3 SV=3	G-patch domain protein (Spp2), putative	18169560	-	-	-	-
CCM_02950	1445.68	634.437	-1.1882	0.000690461	0.0173844	NW_006271970.1	GO:0070588;GO:0016021;GO:0015369	K07300	sordNOG10505	P	sp|Q99385|VCX1_YEAST Vacuolar calcium ion transporter OS=Saccharomyces cerevisiae (strain ATCC 204508 / S288c) GN=VCX1 PE=1 SV=1	Ca2+/H+ antiporter	18164977	GO:0070588//calcium ion transmembrane transport;	GO:0016021//integral component of membrane;	GO:0015369//calcium:proton antiporter activity;	-
CCM_04482	106.789	34.5518	-1.62793	0.00070646	0.0176051	NW_006271971.1	-	-	hypNOG12288;opiNOG36377;sordNOG13187	S	-	hypothetical protein	18166505	-	-	-	-
CCM_02764	1770.52	655.482	-1.43354	0.000707594	0.0176051	NW_006271970.1	GO:0016884	-	opiNOG06348;sordNOG10611;sorNOG07259	J	sp|A4J6Z8|GATA_DESRM Glutamyl-tRNA(Gln) amidotransferase subunit A OS=Desulfotomaculum reducens (strain MI-1) GN=gatA PE=3 SV=1	Amidase	18164791	-	-	GO:0016884//carbon-nitrogen ligase activity, with glutamine as amido-N-donor;	-
CCM_09368	215.043	93.7009	-1.19849	0.000709228	0.0176051	NW_006271977.1	-	K22075	opiNOG41716	T	sp|P39724|BOL3_YEAST BolA-like protein 3 OS=Saccharomyces cerevisiae (strain ATCC 204508 / S288c) GN=BOL3 PE=1 SV=1	BolA-like protein	18171371	-	-	-	-
CCM_00819	270.164	120.358	-1.16651	0.00071063	0.0176051	NW_006271969.1	GO:0016435;GO:0000447;GO:0000282;GO:0005730;GO:0005737;GO:0000056;GO:0070476	K19306	opiNOG02783;sordNOG08463;sorNOG01953	R	sp|P25627|BUD23_YEAST 18S rRNA (guanine(1575)-N(7))-methyltransferase OS=Saccharomyces cerevisiae (strain ATCC 204508 / S288c) GN=BUD23 PE=1 SV=1	methyltransferase	18162853	GO:0000447//endonucleolytic cleavage in ITS1 to separate SSU-rRNA from 5.8S rRNA and LSU-rRNA from tricistronic rRNA transcript (SSU-rRNA, 5.8S rRNA, LSU-rRNA);GO:0000282//cellular bud site selection;GO:0000056//ribosomal small subunit export from nucleus;GO:0070476//rRNA (guanine-N7)-methylation;	GO:0005730//nucleolus;GO:0005737//cytoplasm;	GO:0016435//rRNA (guanine) methyltransferase activity;	-
CCM_09335	39667.3	13036.9	-1.60535	0.000757957	0.018597	NW_006271976.1	-	-	NOG200556	S	-	hypothetical protein	18171338	-	-	-	-
CCM_08664	1080.47	267.301	-2.01512	0.000760438	0.0186104	NW_006271975.1	GO:0071949;GO:0016021;GO:0016491;GO:0055114	K00480	saccNOG08130;opiNOG07069	C	sp|J4VWM7|OPS4_BEAB2 FAD-dependent monooxygenase OpS4 OS=Beauveria bassiana (strain ARSEF 2860) GN=OpS4 PE=1 SV=1	Salicylate hydroxylase	18170670	GO:0055114//obsolete oxidation-reduction process;	GO:0016021//integral component of membrane;	GO:0071949//FAD binding;GO:0016491//oxidoreductase activity;	ko00626(Naphthalene degradation);ko00624(Polycyclic aromatic hydrocarbon degradation);ko00621(Dioxin degradation)
CCM_05575	215.293	94.0641	-1.19459	0.000766175	0.0187032	NW_006271972.1	GO:0042254;GO:0005634	K14852	sordNOG05890;opiNOG13127	J	sp|Q08746|RRS1_YEAST Regulator of ribosome biosynthesis OS=Saccharomyces cerevisiae (strain ATCC 204508 / S288c) GN=RRS1 PE=1 SV=1	ribosome biogenesis protein	18167593	GO:0042254//ribosome biogenesis;	GO:0005634//nucleus;	-	-
CCM_01157	860.322	427.565	-1.00873	0.00077784	0.0189399	NW_006271969.1	-	-	hypNOG14296;necNOG14195	S	-	hypothetical protein	18163189	-	-	-	-
CCM_07340	304.905	142.089	-1.10157	0.000799882	0.0193298	NW_006271974.1	-	K20827	sordNOG12413	S	-	DUF408 domain protein	18169351	-	-	-	-
CCM_06743	8378.61	3072.11	-1.44748	0.000815238	0.0196515	NW_006271973.1	GO:0032991;GO:1901363;GO:0006261;GO:0097159;GO:0031981;GO:0016021	-	sordNOG10345	S	-	hypothetical protein	18168756	GO:0006261//DNA-dependent DNA replication;	GO:0032991//protein-containing complex;GO:0031981//nuclear lumen;GO:0016021//integral component of membrane;	GO:1901363//heterocyclic compound binding;GO:0097159//organic cyclic compound binding;	-
CCM_01283	139.244	56.3872	-1.30418	0.0008176	0.0196592	NW_006271969.1	GO:0016747	K19747	sordNOG13270;opiNOG45029	S	sp|C8VPT2|EASC_EMENI Acyltransferase easC OS=Emericella nidulans (strain FGSC A4 / ATCC 38163 / CBS 112.46 / NRRL 194 / M139) GN=easC PE=3 SV=1	Transferase	18163314	-	-	GO:0016747//acyltransferase activity, transferring groups other than amino-acyl groups;	-
CCM_00399	328.469	151.132	-1.11994	0.000822442	0.0196963	NW_006271969.1	-	K14840	sordNOG09784	S	sp|Q9UUI4|NOP53_SCHPO Ribosome biogenesis protein NOP53 OS=Schizosaccharomyces pombe (strain 972 / ATCC 24843) GN=rrp16 PE=1 SV=1	p60 domain protein	18162434	-	-	-	-
CCM_02265	598.609	294.817	-1.0218	0.000829184	0.0197403	NW_006271970.1	GO:0016021	K22736	opiNOG60016;sordNOG13880	S	sp|P47818|CCC1_YEAST Protein CCC1 OS=Saccharomyces cerevisiae (strain ATCC 204508 / S288c) GN=CCC1 PE=1 SV=1	hypothetical protein	18164292	-	GO:0016021//integral component of membrane;	-	-
CCM_09031	693.689	343.569	-1.01369	0.000873355	0.0202897	NW_006271975.1	GO:0055114;GO:0016491;GO:0008270	-	sordNOG08025	C	sp|O35017|YOGA_BACSU Uncharacterized zinc-type alcohol dehydrogenase-like protein YogA OS=Bacillus subtilis (strain 168) GN=yogA PE=3 SV=1	alcohol dehydrogenase	18171035	GO:0055114//obsolete oxidation-reduction process;	-	GO:0016491//oxidoreductase activity;GO:0008270//zinc ion binding;	-
CCM_00476	107.932	40.7333	-1.40584	0.000898762	0.020744	NW_006271969.1	GO:0006357;GO:0008270;GO:0005634;GO:0000981	-	eurotNOG11501;opiNOG50666	S	-	Fungal transcriptional regulatory protein	18162511	GO:0006357//regulation of transcription by RNA polymerase II;	GO:0005634//nucleus;	GO:0008270//zinc ion binding;GO:0000981//DNA-binding transcription factor activity, RNA polymerase II-specific;	-
CCM_09568	96.8176	34.9979	-1.468	0.000918556	0.0210498	NW_006271977.1	GO:0016020	-	opiNOG64276;hypNOG14062;sordNOG14396	S	-	hypothetical protein	18171570	-	GO:0016020//membrane;	-	-
CCM_05252	89.504	31.6537	-1.49958	0.000948237	0.0215098	NW_006271972.1	GO:0032259;GO:0008168	K00547	sordNOG08507;opiNOG06991	ES	-	homocysteine S-methyltransferase	18167271	GO:0032259//methylation;	-	GO:0008168//methyltransferase activity;	ko00270(Cysteine and methionine metabolism)
CCM_06120	3634.37	993.31	-1.87139	0.000954774	0.0216071	NW_006271972.1	-	K24611	sordNOG05265;opiNOG07148	S	sp|Q9ZVJ2|AMERL_ARATH Uncharacterized protein At2g38710 OS=Arabidopsis thaliana GN=At2g38710 PE=2 SV=1	ammecr1 family protein	18168135	-	-	-	-
CCM_02722	3773.9	1521.11	-1.31093	0.000965916	0.0217569	NW_006271970.1	GO:0016021	K08994	sordNOG08137	S	sp|P72926|Y1024_SYNY3 UPF0187 protein sll1024 OS=Synechocystis sp. (strain PCC 6803 / Kazusa) GN=sll1024 PE=3 SV=2	UPF0187 domain membrane protein	18164749	-	GO:0016021//integral component of membrane;	-	-
CCM_00192	318.71	142.005	-1.1663	0.000969493	0.0217864	NW_006271969.1	-	-	opiNOG41900;sordNOG13239	S	-	hypothetical protein	18162227	-	-	-	-
CCM_09276	365.235	139.605	-1.38747	0.00102779	0.0229358	NW_006271976.1	GO:0016853;GO:0008152	-	opiNOG31100;opiNOG06679;sordNOG08004	I	sp|A4YI89|HPCD_METS5 3-hydroxypropionyl-coenzyme A dehydratase OS=Metallosphaera sedula (strain ATCC 51363 / DSM 5348 / JCM 9185 / NBRC 15509 / TH2) GN=Msed_2001 PE=1 SV=1	enoyl-CoA hydratase	18171279	GO:0008152//metabolic process;	-	GO:0016853//isomerase activity;	-
CCM_00780	5493.04	1386.43	-1.98622	0.0010936	0.0241243	NW_006271969.1	GO:0006508;GO:0016021;GO:0004190	-	opiNOG49046;NOG132913	OS	sp|C4YMJ3|CARP2_CANAW Candidapepsin-2 OS=Candida albicans (strain WO-1) GN=SAP2 PE=1 SV=1	candidapepsin-4 precursor	18162814	GO:0006508//proteolysis;	GO:0016021//integral component of membrane;	GO:0004190//aspartic-type endopeptidase activity;	-
CCM_06330	298.101	141.582	-1.07417	0.00116006	0.0250729	NW_006271972.1	-	-	-	-	-	hypothetical protein	18168344	-	-	-	-
CCM_06731	925.264	121.16	-2.93295	0.00126519	0.026803	NW_006271973.1	-	-	opiNOG55198;sordNOG13094;opiNOG64258;opiNOG64081	KS	-	bZIP transcription factor	18168745	-	-	-	-
CCM_06122	472.902	189.7	-1.31782	0.00128359	0.0270341	NW_006271972.1	GO:0005622;GO:0005525;GO:0007264	-	sordNOG04667;sordNOG07817	R	sp|P34729|RAS1_PHYPO Ras-like protein 1 OS=Physarum polycephalum GN=RAS1 PE=2 SV=1	RAS small monomeric GTPase, putative	18168137	GO:0007264//small GTPase mediated signal transduction;	GO:0005622//intracellular anatomical structure;	GO:0005525//GTP binding;	-
CCM_03123	875.354	296.99	-1.55945	0.00129463	0.0270341	NW_006271970.1	GO:0006629;GO:0016021;GO:0030729	K01907	opiNOG17052;opiNOG05394;sordNOG10305	I	sp|Q5ZLG0|AACS_CHICK Acetoacetyl-CoA synthetase OS=Gallus gallus GN=AACS PE=2 SV=1	acetoacetyl-CoA synthase	18165150	GO:0006629//lipid metabolic process;	GO:0016021//integral component of membrane;	GO:0030729//acetoacetate-CoA ligase activity;	ko00650(Butanoate metabolism);ko00280(Valine, leucine and isoleucine degradation)
CCM_05709	177.329	37.2325	-2.25179	0.00129489	0.0270341	NW_006271972.1	GO:0016021;GO:0016052;GO:0008496	K08257	hypNOG03770;sordNOG04720;opiNOG19415	RS	sp|P36091|DCW1_YEAST Mannan endo-1,6-alpha-mannosidase DCW1 OS=Saccharomyces cerevisiae (strain ATCC 204508 / S288c) GN=DCW1 PE=1 SV=1	Mannan endo-1,6-alpha-mannosidase	18167727	GO:0016052//carbohydrate catabolic process;	GO:0016021//integral component of membrane;	GO:0008496//mannan endo-1,6-alpha-mannosidase activity;	-
CCM_07922	455.759	92.7115	-2.29745	0.00129858	0.0270341	NW_006271974.1	GO:0055114;GO:0016491	-	opiNOG53024;sordNOG10321;opiNOG22969	I	-	hypothetical protein	18169932	GO:0055114//obsolete oxidation-reduction process;	-	GO:0016491//oxidoreductase activity;	-
CCM_09418	3855.64	1382.34	-1.47986	0.00130425	0.0270647	NW_006271977.1	-	-	NOG179698	S	-	hypothetical protein	18171421	-	-	-	-
CCM_03657	261.592	121.877	-1.10189	0.00130568	0.0270647	NW_006271971.1	GO:0005622;GO:0000160;GO:0006355;GO:0003677	-	-	-	-	capsular synthesis regulator component B	18165683	GO:0000160//phosphorelay signal transduction system;GO:0006355//regulation of transcription, DNA-templated;	GO:0005622//intracellular anatomical structure;	GO:0003677//DNA binding;	-
CCM_06599	105.414	41.5147	-1.34437	0.00133828	0.0276215	NW_006271973.1	GO:0006397	K12861	sordNOG13700;hypNOG12648;opiNOG78198	S	sp|Q5RKQ0|SPF27_DANRE Pre-mRNA-splicing factor SPF27 OS=Danio rerio GN=bcas2 PE=2 SV=1	BCAS2 family protein	18168613	GO:0006397//mRNA processing;	-	-	ko03040(Spliceosome)
CCM_02729	1330.26	608.282	-1.12889	0.00144175	0.0291319	NW_006271970.1	GO:0022891;GO:0055085;GO:0008643;GO:0016021	K08139	opiNOG05372	R	sp|O74969|GHT2_SCHPO High-affinity glucose transporter ght2 OS=Schizosaccharomyces pombe (strain 972 / ATCC 24843) GN=ght2 PE=1 SV=1	sugar transporter, putative	18164756	GO:0055085//transmembrane transport;GO:0008643//carbohydrate transport;	GO:0016021//integral component of membrane;	-	ko04113(Meiosis - yeast)
CCM_04289	125.847	52.566	-1.25947	0.00144747	0.0291862	NW_006271971.1	GO:0005829;GO:0005634;GO:0045943;GO:0031929;GO:0009966;GO:0019898	K17606	sordNOG04832	T	sp|Q9Y7T1|YCJ5_SCHPO Uncharacterized protein C63.05 OS=Schizosaccharomyces pombe (strain 972 / ATCC 24843) GN=SPCC63.05 PE=3 SV=1	TOR signaling pathway regulator (TapA), putative	18166312	GO:0045943//positive regulation of transcription by RNA polymerase I;GO:0031929//TOR signaling;GO:0009966//regulation of signal transduction;	GO:0005829//cytosol;GO:0005634//nucleus;GO:0019898//extrinsic component of membrane;	-	ko04140(Autophagy - animal);ko04138(Autophagy - yeast);ko04136(Autophagy - other)
CCM_09423	105.43	30.0886	-1.809	0.00149981	0.02999	NW_006271977.1	-	-	sordNOG13776;sorNOG05942	S	-	hypothetical protein	18171426	-	-	-	-
CCM_08853	246.352	115.72	-1.09009	0.00150337	0.0299988	NW_006271975.1	GO:0008080	-	sordNOG12593;opiNOG30974	R	-	Acyl-CoA N-acyltransferase	18170858	-	-	GO:0008080//N-acetyltransferase activity;	-
CCM_09184	431.83	212.977	-1.01976	0.00156272	0.0307996	NW_006271976.1	-	-	-	-	-	hypothetical protein	18171187	-	-	-	-
CCM_01701	211.626	95.8697	-1.14237	0.00158741	0.0311587	NW_006271969.1	-	-	opiNOG50704	S	-	hypothetical protein	18163731	-	-	-	-
CCM_08550	217.487	98.346	-1.14499	0.00160566	0.0314011	NW_006271975.1	GO:0055114;GO:0008137;GO:0009055;GO:0016020	K18160	opiNOG34481;sordNOG13477	S	sp|Q6C7L6|N7BML_YARLI NADH-ubiquinone oxidoreductase assembly factor N7BML OS=Yarrowia lipolytica (strain CLIB 122 / E 150) GN=N7BML PE=1 SV=1	hypothetical protein	18170557	GO:0055114//obsolete oxidation-reduction process;	GO:0016020//membrane;	GO:0008137//NADH dehydrogenase (ubiquinone) activity;GO:0009055//electron transfer activity;	ko04714(Thermogenesis)
CCM_02970	3226.91	579.638	-2.47693	0.00162795	0.0317598	NW_006271970.1	-	-	opiNOG80871;hypNOG02149;necNOG07458;sordNOG12329	S	-	hypothetical protein	18164997	-	-	-	-
CCM_00188	252.897	117.988	-1.09991	0.00181151	0.0342974	NW_006271969.1	-	-	sordNOG15246;sordNOG15231;opiNOG45571	S	-	hypothetical protein	18162223	-	-	-	-
CCM_08398	318.775	154.25	-1.04727	0.00183052	0.0345215	NW_006271975.1	-	-	opiNOG70840;sordNOG14384	S	-	hypothetical protein	18170406	-	-	-	-
CCM_00421	206.443	95.3965	-1.11374	0.00186281	0.0349932	NW_006271969.1	GO:0003676;GO:0000027;GO:0005730;GO:0090305;GO:0006364;GO:0004527	K18327	opiNOG10895;sordNOG06332	L	sp|Q4IEV5|REXO4_GIBZE RNA exonuclease 4 OS=Gibberella zeae (strain PH-1 / ATCC MYA-4620 / FGSC 9075 / NRRL 31084) GN=REX4 PE=3 SV=1	exonuclease, putative	18162456	GO:0000027//ribosomal large subunit assembly;GO:0090305//nucleic acid phosphodiester bond hydrolysis;GO:0006364//rRNA processing;	GO:0005730//nucleolus;	GO:0003676//nucleic acid binding;GO:0004527//exonuclease activity;	-
CCM_09199	205.742	71.989	-1.51499	0.00187981	0.0352438	NW_006271976.1	GO:0009088;GO:0004072;GO:0016310;GO:0009089	K00928	opiNOG03785;sordNOG08577	E	sp|W7MS01|FUB3_GIBM7 Aspartate kinase FUB3 OS=Gibberella moniliformis (strain M3125 / FGSC 7600) GN=FUB3 PE=1 SV=1	aspartokinase	18171202	GO:0009088//threonine biosynthetic process;GO:0016310//phosphorylation;GO:0009089//lysine biosynthetic process via diaminopimelate;	-	GO:0004072//aspartate kinase activity;	ko00300(Lysine biosynthesis);ko00270(Cysteine and methionine metabolism);ko00261(Monobactam biosynthesis);ko00260(Glycine, serine and threonine metabolism)
CCM_02083	494.923	183.76	-1.42938	0.00189876	0.0354747	NW_006271970.1	GO:0008643;GO:0055085;GO:0016021;GO:0022857	-	euroNOG07712;opiNOG01156;sordNOG05363	R	sp|P0CD99|MPH2_YEAST Alpha-glucosides permease MPH2 OS=Saccharomyces cerevisiae (strain ATCC 204508 / S288c) GN=MPH2 PE=2 SV=1	sugar transporter, putative	18164112	GO:0008643//carbohydrate transport;GO:0055085//transmembrane transport;	GO:0016021//integral component of membrane;	GO:0022857//transmembrane transporter activity;	-
CCM_07194	329.809	162.522	-1.02099	0.00191389	0.0356051	NW_006271973.1	GO:0003735;GO:0005762;GO:0032543	K02892	sordNOG13591	J	sp|Q09727|MRP20_SCHPO 54S ribosomal protein L23, mitochondrial OS=Schizosaccharomyces pombe (strain 972 / ATCC 24843) GN=mrp20 PE=3 SV=1	mitochondrial ribosomal protein L23, putative	18169205	GO:0032543//mitochondrial translation;	GO:0005762//mitochondrial large ribosomal subunit;	GO:0003735//structural constituent of ribosome;	ko03010(Ribosome)
CCM_05096	1661.78	794.86	-1.06396	0.00195474	0.0362947	NW_006271972.1	GO:0006564;GO:0051287;GO:0004617;GO:0055114;GO:0016597	K00058	opiNOG05818	E	sp|O04130|SERA2_ARATH D-3-phosphoglycerate dehydrogenase 2, chloroplastic OS=Arabidopsis thaliana GN=PGDH2 PE=1 SV=2	d-3-phosphoglycerate dehydrogenase	18167116	GO:0006564//L-serine biosynthetic process;GO:0055114//obsolete oxidation-reduction process;	-	GO:0051287//NAD binding;GO:0004617//phosphoglycerate dehydrogenase activity;GO:0016597//amino acid binding;	ko00680(Methane metabolism);ko00270(Cysteine and methionine metabolism);ko00260(Glycine, serine and threonine metabolism)
CCM_04493	112.323	24.94	-2.17112	0.00199063	0.036819	NW_006271971.1	GO:0016740	K17803	sordNOG06966;opiNOG27896	RS	sp|Q06668|OMS1_YEAST Methyltransferase OMS1, mitochondrial OS=Saccharomyces cerevisiae (strain ATCC 204508 / S288c) GN=OMS1 PE=1 SV=1	ubiquinone/menaquinone biosynthesis-related protein	18166516	-	-	GO:0016740//transferase activity;	-
CCM_09145	1303.24	601.561	-1.11532	0.00203641	0.0373781	NW_006271976.1	-	-	opiNOG04215	I	sp|Q10138|YAS2_SCHPO CRAL-TRIO domain-containing protein C3H8.02 OS=Schizosaccharomyces pombe (strain 972 / ATCC 24843) GN=SPAC3H8.02 PE=1 SV=1	CRAL/TRIO domain protein	18171148	-	-	-	-
CCM_03388	163.47	55.7797	-1.55122	0.00204173	0.0374045	NW_006271970.1	-	-	-	-	-	hypothetical protein	18165414	-	-	-	-
CCM_04057	95.1472	38.1237	-1.31947	0.00218383	0.0394814	NW_006271971.1	-	K18191	sordNOG14179	S	-	Ras guanyl-nucleotide exchange factor RasGEF, putative	18166080	-	-	-	ko04139(Mitophagy - yeast)
CCM_08427	4761.88	1636.31	-1.54109	0.00230731	0.0412485	NW_006271975.1	GO:0016021	-	opiNOG26446;opiNOG20370;sordNOG09264	TS	-	hypothetical protein	18170435	-	GO:0016021//integral component of membrane;	-	-
CCM_08714	863.469	338.342	-1.35166	0.00233669	0.0416962	NW_006271975.1	GO:0016810	-	opiNOG34865;COG1574;sordNOG10129	SR	sp|O34355|YTCJ_BACSU Putative amidohydrolase YtcJ OS=Bacillus subtilis (strain 168) GN=ytcJ PE=3 SV=1	amidohydrolase family protein	18170720	-	-	GO:0016810//hydrolase activity, acting on carbon-nitrogen (but not peptide) bonds;	-
CCM_03758	254.35	124.253	-1.03353	0.00240819	0.0427343	NW_006271971.1	GO:0000398;GO:0000166;GO:0005686;GO:0071004;GO:0003723	K12831	sordNOG07951;KOG0131	A	sp|O14102|SAP49_SCHPO Spliceosome-associated protein 49 OS=Schizosaccharomyces pombe (strain 972 / ATCC 24843) GN=sap49 PE=3 SV=2	splicing factor 3b subunit 4	18165781	GO:0000398//mRNA splicing, via spliceosome;	GO:0005686//U2 snRNP;GO:0071004//U2-type prespliceosome;	GO:0000166//nucleotide binding;GO:0003723//RNA binding;	ko03040(Spliceosome)
CCM_02449	266.652	97.8904	-1.44572	0.00244709	0.0432649	NW_006271970.1	-	-	-	-	-	hypothetical protein	18164476	-	-	-	-
CCM_05225	327.809	149.144	-1.13615	0.00272892	0.0469897	NW_006271972.1	GO:0016740	-	magNOG06962;opiNOG49777	R	-	Aminoglycoside phosphotransferase	18167244	-	-	GO:0016740//transferase activity;	-
CCM_09233	283.168	68.7238	-2.04278	0.00278412	0.0478173	NW_006271976.1	GO:0016021;GO:0008484;GO:0008152	-	opiNOG19445	R	-	sulfatase domain protein	18171236	GO:0008152//metabolic process;	GO:0016021//integral component of membrane;	GO:0008484//sulfuric ester hydrolase activity;	-
CCM_04606	2163.21	285.92	-2.91949	0.00284928	0.0485033	NW_006271971.1	GO:0016021	-	opiNOG07754;sordNOG09236	S	sp|A7KAK4|ATG22_PICAN Autophagy-related protein 22 OS=Pichia angusta GN=ATG22 PE=3 SV=1	autophagy protein (Atg22), putative	18166629	-	GO:0016021//integral component of membrane;	-	-
CCM_07880	1218.38	325.206	-1.90554	0.00295067	0.049964	NW_006271974.1	GO:0046872;GO:0004177;GO:0006508	K01264	opiNOG45917;sordNOG06028	OP	sp|P96264|LPQL_MYCTU Probable lipoprotein aminopeptidase LpqL OS=Mycobacterium tuberculosis (strain ATCC 25618 / H37Rv) GN=lpqL PE=1 SV=1	aminopeptidase Y	18169890	GO:0006508//proteolysis;	-	GO:0046872//metal ion binding;GO:0004177//aminopeptidase activity;	-
CCM_04963	194.306	92.3663	-1.07289	0.00300964	0.0506062	NW_006271971.1	GO:0016614;GO:0050660;GO:0055114	-	opiNOG17517	R	sp|Q54H55|Y8969_DICDI FAD-linked oxidoreductase DDB_G0289697 OS=Dictyostelium discoideum GN=DDB_G0289697 PE=2 SV=1	FAD linked oxidase domain protein	18166983	GO:0055114//obsolete oxidation-reduction process;	-	GO:0016614//oxidoreductase activity, acting on CH-OH group of donors;GO:0050660//flavin adenine dinucleotide binding;	-
CCM_09500	16514.5	4860.19	-1.76464	0.00323048	0.0533861	NW_006271977.1	-	-	opiNOG52116;sordNOG07514	S	-	hypothetical protein	18171502	-	-	-	-
CCM_04995	355.612	42.1242	-3.07759	0.00334608	0.0547323	NW_006271971.1	GO:0046872;GO:0055114;GO:0016491	-	opiNOG21760;sordNOG07303	Q	sp|P32021|EFE_PSESH 2-oxoglutarate-dependent ethylene/succinate-forming enzyme OS=Pseudomonas savastanoi pv. phaseolicola GN=efe PE=1 SV=1	2-oxoglutarate-dependent ethylene/succinate-forming enzyme	18167015	GO:0055114//obsolete oxidation-reduction process;	-	GO:0046872//metal ion binding;GO:0016491//oxidoreductase activity;	-
CCM_02123	455.988	227.152	-1.00534	0.00343275	0.0556765	NW_006271970.1	GO:0050662;GO:0003824	-	sordNOG10961;opiNOG03105	R	sp|P35673|GALE_ERWAM UDP-glucose 4-epimerase OS=Erwinia amylovora GN=galE PE=3 SV=1	oxidoreductase	18164151	-	-	GO:0050662//obsolete coenzyme binding;GO:0003824//catalytic activity;	-
CCM_03080	221.076	109.123	-1.01859	0.00345296	0.0558161	NW_006271970.1	GO:0030687;GO:0042273;GO:0005730	K14839	opiNOG14322;sordNOG12591	J	sp|A4R9U5|NOP16_MAGO7 Nucleolar protein 16 OS=Magnaporthe oryzae (strain 70-15 / ATCC MYA-4617 / FGSC 8958) GN=NOP16 PE=3 SV=2	nucleolar protein 16	18165107	GO:0042273//ribosomal large subunit biogenesis;	GO:0030687//preribosome, large subunit precursor;GO:0005730//nucleolus;	-	-
CCM_06828	983.72	434.334	-1.17944	0.00352908	0.0567489	NW_006271973.1	GO:0008483;GO:0006730;GO:0004375;GO:0055114;GO:0004047;GO:0032259;GO:0006546	K00605	sordNOG06837	E	sp|O14110|GCST_SCHPO Probable aminomethyltransferase, mitochondrial OS=Schizosaccharomyces pombe (strain 972 / ATCC 24843) GN=gcv1 PE=3 SV=1	aminomethyltransferase	18168839	GO:0006730//one-carbon metabolic process;GO:0055114//obsolete oxidation-reduction process;GO:0032259//methylation;GO:0006546//glycine catabolic process;	-	GO:0008483//transaminase activity;GO:0004375//glycine dehydrogenase (decarboxylating) activity;GO:0004047//aminomethyltransferase activity;	ko00670(One carbon pool by folate);ko00630(Glyoxylate and dicarboxylate metabolism);ko00260(Glycine, serine and threonine metabolism)
CCM_02416	88.0335	21.8357	-2.01136	0.00354017	0.0567489	NW_006271970.1	-	-	-	-	-	hypothetical protein	18164443	-	-	-	-
CCM_05228	2742.41	958.733	-1.51624	0.00359193	0.0572922	NW_006271972.1	-	-	saccNOG08672;opiNOG31922;fuNOG25588;opiNOG29127	Q	sp|Q7Z9I3|YCP8_SCHPO Uncharacterized oxidoreductase C663.08c OS=Schizosaccharomyces pombe (strain 972 / ATCC 24843) GN=SPCC663.08c PE=3 SV=1	short chain dehydrogenase	18167247	-	-	-	-
CCM_07979	539.863	180.041	-1.58427	0.00398725	0.0623568	NW_006271974.1	GO:0016787	-	opiNOG07337	R	sp|Q8DR77|UCDH_STRR6 Unsaturated chondroitin disaccharide hydrolase OS=Streptococcus pneumoniae (strain ATCC BAA-255 / R6) GN=ugl PE=1 SV=1	glucuronyl hydrolase, putative	18169989	-	-	GO:0016787//hydrolase activity;	-
CCM_08319	426.282	201.298	-1.08248	0.00401447	0.0625789	NW_006271975.1	GO:0055114;GO:0008270;GO:0016491	-	sordNOG06526;sorNOG04565;opiNOG14722	SR	sp|Q0MVN8|QOR_PIG Quinone oxidoreductase OS=Sus scrofa GN=CRYZ PE=2 SV=1	oxidoreductase, zinc-binding dehydrogenase family, putative	18170327	GO:0055114//obsolete oxidation-reduction process;	-	GO:0008270//zinc ion binding;GO:0016491//oxidoreductase activity;	-
CCM_09273	3121.87	1359.11	-1.19975	0.00408865	0.0635677	NW_006271976.1	GO:0016021	-	COG0399	E	-	hypothetical protein	18171276	-	GO:0016021//integral component of membrane;	-	-
CCM_02021	1928.34	782.468	-1.30126	0.00410863	0.0635784	NW_006271970.1	-	-	opiNOG21377;COG1413;magNOG09341;sordNOG05288;sorNOG07026	SC	sp|A6QLE5|NLRP3_BOVIN NACHT, LRR and PYD domains-containing protein 3 OS=Bos taurus GN=NLRP3 PE=2 SV=1	Armadillo-type fold domain containing protein	18164050	-	-	-	-
CCM_08632	113.117	1.71838	-6.04063	0.00411164	0.0635784	NW_006271975.1	GO:0006633;GO:0005506;GO:0016021;GO:0055114;GO:0016491	K00227	COG3000;opiNOG04506;opiNOG57412	I	sp|Q8J207|ERG3_LEPMC Delta(7)-sterol 5(6)-desaturase OS=Leptosphaeria maculans GN=ERG3 PE=3 SV=1	ABC transporter, putative	18170638	GO:0006633//fatty acid biosynthetic process;GO:0055114//obsolete oxidation-reduction process;	GO:0016021//integral component of membrane;	GO:0005506//iron ion binding;GO:0016491//oxidoreductase activity;	ko00100(Steroid biosynthesis)
CCM_00456	171.635	81.7627	-1.06983	0.00412298	0.0636232	NW_006271969.1	-	K01049	sorNOG06738;sordNOG10766;opiNOG06838	RT	sp|Q69ZK9|NLGN2_MOUSE Neuroligin-2 OS=Mus musculus GN=Nlgn2 PE=1 SV=2	triacylglycerol lipase, putative	18162491	-	-	-	ko04725(Cholinergic synapse);ko00564(Glycerophospholipid metabolism)
CCM_02989	1299.02	583.234	-1.15527	0.00413848	0.0636863	NW_006271970.1	-	-	opiNOG39306;sordNOG13256;NOG135430	S	-	DNA repair protein (Rad57), putative	18165016	-	-	-	-
CCM_07915	99.2451	42.7811	-1.21402	0.00439877	0.0664166	NW_006271974.1	-	-	opiNOG75920;opiNOG56186;COG2320	SR	sp|Q9KBN7|Y1888_BACHD UPF0157 protein BH1888 OS=Bacillus halodurans (strain ATCC BAA-125 / DSM 18197 / FERM 7344 / JCM 9153 / C-125) GN=BH1888 PE=3 SV=1	GrpB domain protein	18169925	-	-	-	-
CCM_05463	184.566	90.6804	-1.02527	0.00442272	0.0665306	NW_006271972.1	-	-	opiNOG52805	K	-	C6 transcription factor, putative	18167481	-	-	-	-
CCM_09555	2130.76	415.862	-2.35719	0.00442707	0.0665306	NW_006271977.1	-	-	-	-	-	hypothetical protein	18171557	-	-	-	-
CCM_00828	238.031	108.224	-1.13713	0.0044635	0.0667586	NW_006271969.1	GO:0016021	-	NOG148963	S	-	hypothetical protein	18162862	-	GO:0016021//integral component of membrane;	-	-
CCM_05186	3799.16	1746.87	-1.12091	0.00476186	0.0695032	NW_006271972.1	GO:0005975;GO:0016853;GO:0030246	K01785	sordNOG07070;opiNOG04019	G	sp|D4AMB9|GALM_ARTBC Probable aldose 1-epimerase ARB_05372 OS=Arthroderma benhamiae (strain ATCC MYA-4681 / CBS 112371) GN=ARB_05372 PE=1 SV=1	aldose 1-epimerase	18167205	GO:0005975//carbohydrate metabolic process;	-	GO:0016853//isomerase activity;GO:0030246//carbohydrate binding;	ko00052(Galactose metabolism);ko00010(Glycolysis / Gluconeogenesis)
CCM_05950	161.553	67.7257	-1.25423	0.00484322	0.0704722	NW_006271972.1	GO:0055114;GO:0016491	K00306	opiNOG26806	R	sp|O43029|FAP1_SCHPO L-pipecolate oxidase OS=Schizosaccharomyces pombe (strain 972 / ATCC 24843) GN=fap1 PE=1 SV=1	sarcosine oxidase, putative	18167968	GO:0055114//obsolete oxidation-reduction process;	-	GO:0016491//oxidoreductase activity;	ko04146(Peroxisome);ko00310(Lysine degradation);ko00260(Glycine, serine and threonine metabolism)
CCM_03212	1914.74	861.198	-1.15273	0.00486228	0.0706426	NW_006271970.1	GO:0004371;GO:0016310;GO:0006071;GO:0005524	K00863	sordNOG05239;opiNOG03609	G	sp|O13902|DAK1_SCHPO Dihydroxyacetone kinase 1 OS=Schizosaccharomyces pombe (strain 972 / ATCC 24843) GN=dak1 PE=3 SV=1	dihydroxyacetone kinase	18165238	GO:0016310//phosphorylation;GO:0006071//glycerol metabolic process;	-	GO:0004371//glycerone kinase activity;GO:0005524//ATP binding;	ko04622(RIG-I-like receptor signaling pathway);ko00680(Methane metabolism);ko00561(Glycerolipid metabolism);ko00051(Fructose and mannose metabolism)
CCM_02504	156.944	75.6088	-1.05362	0.0049867	0.0720151	NW_006271970.1	GO:0017176;GO:0005783	K03858	opiNOG40983;sordNOG13416	G	sp|Q9Y7L7|GPI15_SCHPO Phosphatidylinositol N-acetylglucosaminyltransferase subunit gpi15 OS=Schizosaccharomyces pombe (strain 972 / ATCC 24843) GN=gpi15 PE=3 SV=1	phosphatidylinositol N-acetylglucosaminyltransferase	18164531	-	GO:0005783//endoplasmic reticulum;	GO:0017176//phosphatidylinositol N-acetylglucosaminyltransferase activity;	ko00563(Glycosylphosphatidylinositol (GPI)-anchor biosynthesis)
CCM_03309	3583.05	1664.82	-1.10582	0.00508058	0.0729328	NW_006271970.1	GO:0060905;GO:0030818;GO:0005886;GO:0016021	K23678	sordNOG10452;opiNOG16201	S	sp|Q12010|YPQ1_YEAST Probable vacuolar amino acid transporter YPQ1 OS=Saccharomyces cerevisiae (strain ATCC 204508 / S288c) GN=YPQ1 PE=1 SV=1	vacuolar membrane PQ loop repeat protein	18165335	GO:0060905//regulation of induction of conjugation upon nitrogen starvation;GO:0030818//obsolete negative regulation of cAMP biosynthetic process;	GO:0005886//plasma membrane;GO:0016021//integral component of membrane;	-	-
CCM_05688	5765.09	1291.52	-2.15827	0.00565442	0.078989	NW_006271972.1	GO:0005975;GO:0005576;GO:0004553;GO:0030248	K01183	opiNOG07753;sorNOG02423;sordNOG09700	G	sp|Q12713|CHI33_TRIHA Endochitinase 33 OS=Trichoderma harzianum GN=chit33 PE=1 SV=1	class III chitinase, putative	18167706	GO:0005975//carbohydrate metabolic process;	GO:0005576//extracellular region;	GO:0004553//hydrolase activity, hydrolyzing O-glycosyl compounds;GO:0030248//cellulose binding;	ko00520(Amino sugar and nucleotide sugar metabolism)
CCM_05419	1346.67	175.176	-2.94252	0.00566655	0.078989	NW_006271972.1	GO:0008237;GO:0006508	-	opiNOG11422;sorNOG03848	WO	sp|Q871C5|MEP1_NEUCR Extracellular metalloprotease NCU07200 OS=Neurospora crassa (strain ATCC 24698 / 74-OR23-1A / CBS 708.71 / DSM 1257 / FGSC 987) GN=B8G12.220 PE=3 SV=1	metalloprotease 1	18167437	GO:0006508//proteolysis;	-	GO:0008237//metallopeptidase activity;	-
CCM_00533	1918.74	436.236	-2.13698	0.005852	0.0808685	NW_006271969.1	-	-	sordNOG14365	S	-	hypothetical protein	18162568	-	-	-	-
CCM_06904	54.7346	19.4211	-1.49483	0.00596425	0.0819487	NW_006271973.1	GO:0006367;GO:0005634;GO:0044446;GO:0016787	-	NOG73381;sordNOG13452;sordNOG13550;hypNOG08036	S	-	Haloacid dehalogenase-like hydrolase	18168915	GO:0006367//transcription initiation from RNA polymerase II promoter;	GO:0005634//nucleus;GO:0044446//obsolete intracellular organelle part;	GO:0016787//hydrolase activity;	-
CCM_07810	75.8603	24.5563	-1.62725	0.0064145	0.0859258	NW_006271974.1	-	-	NOG133324	S	-	hypothetical protein	18169820	-	-	-	-
CCM_00583	248.376	55.1773	-2.17038	0.00646338	0.0860738	NW_006271969.1	GO:0055114;GO:0016491;GO:0016020;GO:0071949	K00480	opiNOG00334	C	sp|Q3S4B7|3HBH_POLNA 3-hydroxybenzoate 6-hydroxylase OS=Polaromonas naphthalenivorans (strain CJ2) GN=nagX PE=1 SV=1	FAD dependent oxidoreductase	18162618	GO:0055114//obsolete oxidation-reduction process;	GO:0016020//membrane;	GO:0016491//oxidoreductase activity;GO:0071949//FAD binding;	ko00626(Naphthalene degradation);ko00624(Polycyclic aromatic hydrocarbon degradation);ko00621(Dioxin degradation)
CCM_08997	91.8806	40.5043	-1.18168	0.0064703	0.0860738	NW_006271975.1	-	-	opiNOG21218	S	sp|K3VJJ1|FCK3_FUSPC Probable glycosyl transferase FCK3 OS=Fusarium pseudograminearum (strain CS3096) GN=FCK3 PE=2 SV=1	capsule polysaccharide biosynthesis protein, putative	18171001	-	-	-	-
CCM_01855	2222.94	1096.65	-1.01936	0.00656586	0.0871041	NW_006271969.1	-	-	opiNOG24658;opiNOG29998;sordNOG11607	RZ	sp|P53907|YNO4_YEAST Uncharacterized protein YNL144C OS=Saccharomyces cerevisiae (strain ATCC 204508 / S288c) GN=YNL144C PE=1 SV=1	PH domain containing protein	18163884	-	-	-	-
CCM_05219	206.181	68.5381	-1.58893	0.00671559	0.088118	NW_006271972.1	GO:0004514;GO:0009435	K00767	opiNOG00922;sordNOG08064	F	sp|P43619|NADC_YEAST Nicotinate-nucleotide pyrophosphorylase [carboxylating] OS=Saccharomyces cerevisiae (strain ATCC 204508 / S288c) GN=BNA6 PE=1 SV=1	nicotinate-nucleotide pyrophosphorylase	18167238	GO:0009435//NAD biosynthetic process;	-	GO:0004514//nicotinate-nucleotide diphosphorylase (carboxylating) activity;	ko00760(Nicotinate and nicotinamide metabolism)
CCM_07162	110.037	50.3451	-1.12807	0.00675074	0.0882687	NW_006271973.1	GO:0006480;GO:0008168	K16219	opiNOG62138;sordNOG10799;opiNOG25482;sordNOG07469	R	sp|O13748|NTM1_SCHPO Alpha N-terminal protein methyltransferase 1 OS=Schizosaccharomyces pombe (strain 972 / ATCC 24843) GN=tae1 PE=3 SV=1	DUF858 domain protein	18169173	GO:0006480//N-terminal protein amino acid methylation;	-	GO:0008168//methyltransferase activity;	-
CCM_07482	225.289	109.778	-1.03718	0.00678356	0.0883093	NW_006271974.1	-	-	opiNOG39817;sordNOG14667	S	-	hypothetical protein	18169493	-	-	-	-
CCM_02446	95.8489	35.4482	-1.43505	0.00732253	0.0934059	NW_006271970.1	GO:0008080	-	opiNOG18379;COG1670;NOG110564;opiNOG41474;necNOG06101	JRG	-	Acyl-CoA N-acyltransferase	18164473	-	-	GO:0008080//N-acetyltransferase activity;	-
CCM_07318	202006	85539.6	-1.23973	0.00739464	0.0940763	NW_006271974.1	GO:0006508;GO:0004252	K01279	opiNOG09203;opiNOG21516;sordNOG15475	O	sp|Q8NK92|AORSN_ASPOR Aorsin OS=Aspergillus oryzae (strain ATCC 42149 / RIB 40) GN=aorO PE=1 SV=2	protease S8 tripeptidyl peptidase I, putative	18169329	GO:0006508//proteolysis;	-	GO:0004252//serine-type endopeptidase activity;	ko04142(Lysosome)
CCM_01897	307.193	139.158	-1.14242	0.00743913	0.0942682	NW_006271969.1	GO:0071949;GO:0055114;GO:0004497	-	sorNOG07370;opiNOG52093	R	sp|A0A0U1LQD9|CCTM_TALIS FAD-dependent monooxygenase cctM OS=Talaromyces islandicus GN=cctM PE=3 SV=1	monooxygenase, putative	18163926	GO:0055114//obsolete oxidation-reduction process;	-	GO:0071949//FAD binding;GO:0004497//monooxygenase activity;	-
CCM_07989	237.009	68.356	-1.79381	0.00756405	0.0954738	NW_006271974.1	GO:0050660;GO:0055114;GO:0016627	-	pleNOG06589;opiNOG21111	R	sp|P54998|SOXC_RHOSG Dibenzothiophene desulfurization enzyme C OS=Rhodococcus sp. (strain IGTS8) GN=soxC PE=1 SV=1	thermophilic desulfurizing enzyme family protein	18169999	GO:0055114//obsolete oxidation-reduction process;	-	GO:0050660//flavin adenine dinucleotide binding;GO:0016627//oxidoreductase activity, acting on the CH-CH group of donors;	-
CCM_02126	768.564	261.295	-1.55649	0.00764124	0.0960699	NW_006271970.1	GO:0004519;GO:0090305;GO:0004527	-	opiNOG40885;sordNOG04311	R	-	hypothetical protein	18164154	GO:0090305//nucleic acid phosphodiester bond hydrolysis;	-	GO:0004519//endonuclease activity;GO:0004527//exonuclease activity;	-
CCM_08217	2800.52	1118.07	-1.32468	0.00765536	0.0961217	NW_006271974.1	GO:0010181;GO:0055114;GO:0016491	K00101	COG1304;opiNOG10171	C	sp|P09437|CYB2_WICAO Cytochrome b2, mitochondrial OS=Wickerhamomyces anomalus GN=CYB2 PE=1 SV=2	L-lactate dehydrogenase, putative	18170225	GO:0055114//obsolete oxidation-reduction process;	-	GO:0010181//FMN binding;GO:0016491//oxidoreductase activity;	ko00620(Pyruvate metabolism)
CCM_06856	319.979	136.966	-1.22416	0.0082554	0.102057	NW_006271973.1	GO:0016021	-	opiNOG36907;sorNOG08422;sordNOG12981;sordNOG13614	S	-	hypothetical protein	18168867	-	GO:0016021//integral component of membrane;	-	-
CCM_00884	586.446	216.695	-1.43634	0.00865867	0.1053	NW_006271969.1	GO:0050660;GO:0055114;GO:0016614	K00108	opiNOG06135	R	sp|P9WMV4|Y1279_MYCTO Uncharacterized GMC-type oxidoreductase MT1316 OS=Mycobacterium tuberculosis (strain CDC 1551 / Oshkosh) GN=MT1316 PE=3 SV=1	glucose dehydrogenase, putative	18162918	GO:0055114//obsolete oxidation-reduction process;	-	GO:0050660//flavin adenine dinucleotide binding;GO:0016614//oxidoreductase activity, acting on CH-OH group of donors;	ko00260(Glycine, serine and threonine metabolism)
CCM_07640	186.951	90.4397	-1.04763	0.00893003	0.108036	NW_006271974.1	-	-	sordNOG12304;hypNOG03681	S	sp|D4AV38|LIP4_ARTBC Probable secreted lipase ARB_00047 OS=Arthroderma benhamiae (strain ATCC MYA-4681 / CBS 112371) GN=ARB_00047 PE=1 SV=1	hypothetical protein	18169651	-	-	-	-
CCM_06339	98.1046	41.2228	-1.25088	0.00903456	0.109027	NW_006271972.1	-	-	-	-	-	hypothetical protein	18168353	-	-	-	-
CCM_05022	794.246	260.903	-1.60607	0.00908578	0.109327	NW_006271971.1	-	-	pleNOG06336	R	-	hypothetical protein	18167042	-	-	-	-
CCM_08665	45.4042	15.6753	-1.53433	0.00925982	0.110772	NW_006271975.1	-	-	sordNOG09106;opiNOG29072	R	-	extracellular protein	18170671	-	-	-	-
CCM_06624	1013.31	375.808	-1.431	0.00957047	0.113781	NW_006271973.1	GO:0005739;GO:0047631;GO:0019693;GO:0005634;GO:0005829	K01515	opiNOG16519;sordNOG07092	L	sp|Q01976|ADPP_YEAST ADP-ribose pyrophosphatase OS=Saccharomyces cerevisiae (strain ATCC 204508 / S288c) GN=YSA1 PE=1 SV=2	MutT/nudix family protein	18168638	GO:0019693//ribose phosphate metabolic process;	GO:0005739//mitochondrion;GO:0005634//nucleus;GO:0005829//cytosol;	GO:0047631//ADP-ribose diphosphatase activity;	ko00230(Purine metabolism)
CCM_02112	103.215	47.4155	-1.12223	0.00963732	0.114293	NW_006271970.1	-	K07192	opiNOG07013;sordNOG09248	ZU	sp|Q9AV57|FLOT1_ORYSJ Flotillin-like protein 1 OS=Oryza sativa subsp. japonica GN=FLOT1 PE=3 SV=1	flotillin domain-containing protein	18164140	-	-	-	ko04910(Insulin signaling pathway)
CCM_00375	1809.47	559.898	-1.69233	0.00999399	0.116937	NW_006271969.1	GO:0055085;GO:0016021	-	opiNOG11471	G	sp|Q9C0V8|YHJ1_SCHPO Uncharacterized transporter PB10D8.01 OS=Schizosaccharomyces pombe (strain 972 / ATCC 24843) GN=SPBPB10D8.01 PE=3 SV=1	putative allantoate permease of the major facilitator superfamily	18162410	GO:0055085//transmembrane transport;	GO:0016021//integral component of membrane;	-	-
CCM_08258	472.376	194.111	-1.28306	0.0101074	0.117463	NW_006271975.1	GO:0055085;GO:0016021	-	sordNOG04807;opiNOG03703	G	sp|A0A089FNE5|PRLL_FUNXX MFS transporter prlL OS=Fungal sp. (strain NRRL 50135) GN=prlL PE=3 SV=1	vitamin H transporter, putative	18170266	GO:0055085//transmembrane transport;	GO:0016021//integral component of membrane;	-	-
CCM_03378	1087	453.843	-1.26009	0.0103713	0.120005	NW_006271970.1	GO:0006357;GO:0008270;GO:0000981;GO:0005634	-	opiNOG20198;opiNOG44302;sordNOG09314	KS	sp|O93870|FCR1_CANAX Fluconazole resistance protein 1 OS=Candida albicans GN=FCR1 PE=4 SV=1	C6 transcription factor	18165404	GO:0006357//regulation of transcription by RNA polymerase II;	GO:0005634//nucleus;	GO:0008270//zinc ion binding;GO:0000981//DNA-binding transcription factor activity, RNA polymerase II-specific;	-
CCM_02086	1655.98	728.783	-1.18413	0.0104382	0.120126	NW_006271970.1	GO:0030246;GO:0016787;GO:0005975	-	sorNOG03144;sordNOG09963	R	sp|D4ATR3|A7629_ARTBC Uncharacterized secreted glycosidase ARB_07629 OS=Arthroderma benhamiae (strain ATCC MYA-4681 / CBS 112371) GN=ARB_07629 PE=1 SV=1	alpha-1,2-mannosidase family protein, putative	18164115	GO:0005975//carbohydrate metabolic process;	-	GO:0030246//carbohydrate binding;GO:0016787//hydrolase activity;	-
CCM_06429	3341.43	1638.86	-1.02777	0.0105323	0.120595	NW_006271973.1	-	-	NOG214940;opiNOG12144;sordNOG12199;pleNOG01446	S	sp|Q99M03|RWD2B_MOUSE RWD domain-containing protein 2B OS=Mus musculus GN=Rwdd2b PE=2 SV=1	DUF1115 domain protein	18168443	-	-	-	-
CCM_04307	201.125	59.833	-1.74908	0.0107253	0.121646	NW_006271971.1	GO:0006508;GO:0004252	-	sorNOG02631;opiNOG15058;sordNOG05970	O	sp|Q68GV9|ALP_LECPS Alkaline serine protease ver112 OS=Lecanicillium psalliotae PE=1 SV=1	oryzin precursor	18166330	GO:0006508//proteolysis;	-	GO:0004252//serine-type endopeptidase activity;	-
CCM_03704	287.582	135.788	-1.08261	0.0110359	0.123422	NW_006271971.1	GO:0016021	-	necNOG06205;opiNOG36206;sordNOG13933	RS	-	hypothetical protein	18165728	-	GO:0016021//integral component of membrane;	-	-
CCM_01017	79.7524	36.5374	-1.12615	0.0111461	0.123873	NW_006271969.1	GO:0016592;GO:0001104;GO:0006357	-	sordNOG14681	S	-	hypothetical protein	18163050	GO:0006357//regulation of transcription by RNA polymerase II;	GO:0016592//mediator complex;	-	-
CCM_09229	213.855	73.7973	-1.53499	0.0119849	0.130713	NW_006271976.1	-	-	opiNOG35546;sordNOG13311;sorNOG05733	R	-	endo alpha-1,4 polygalactosaminidase	18171232	-	-	-	-
CCM_04894	116.37	52.7643	-1.14108	0.0122491	0.132671	NW_006271971.1	GO:0003735;GO:0005763;GO:0006412	K02959	sordNOG13799	J	sp|P08580|RT16_NEUCR Ribosomal protein S16, mitochondrial OS=Neurospora crassa (strain ATCC 24698 / 74-OR23-1A / CBS 708.71 / DSM 1257 / FGSC 987) GN=cyt-21 PE=3 SV=2	mitochondrial ribosomal protein S16	18166915	GO:0006412//translation;	GO:0005763//mitochondrial small ribosomal subunit;	GO:0003735//structural constituent of ribosome;	ko03010(Ribosome)
CCM_08221	1634.56	77.6206	-4.39632	0.0124601	0.134292	NW_006271974.1	GO:0016042;GO:0004806	-	eurotNOG00414;opiNOG01243	R	sp|D4AX63|LIPA_ARTBC Lipase A OS=Arthroderma benhamiae (strain ATCC MYA-4681 / CBS 112371) GN=ARB_00790 PE=3 SV=1	secretory lipase, putative	18170229	GO:0016042//lipid catabolic process;	-	GO:0004806//triglyceride lipase activity;	-
CCM_08057	199.187	83.6984	-1.25085	0.0124686	0.134292	NW_006271974.1	-	-	opiNOG38732;opiNOG49654;necNOG07103	SR	-	penicillin-binding protein, putative	18170066	-	-	-	-
CCM_08633	132.019	5.44528	-4.5996	0.012548	0.134883	NW_006271975.1	GO:0016021	K00213	sordNOG09307;opiNOG12646;KOG1435	I	sp|Q9UBM7|DHCR7_HUMAN 7-dehydrocholesterol reductase OS=Homo sapiens GN=DHCR7 PE=1 SV=1	7-dehydrocholesterol reductase	18170639	-	GO:0016021//integral component of membrane;	-	ko00100(Steroid biosynthesis)
CCM_08542	340.061	158.59	-1.10049	0.0126141	0.135192	NW_006271975.1	-	-	-	-	-	hypothetical protein	18170549	-	-	-	-
CCM_01650	190.902	71.1872	-1.42314	0.0127709	0.136025	NW_006271969.1	-	-	NOG121180	S	-	hypothetical protein	18163680	-	-	-	-
CCM_01995	42.7582	9.83174	-2.12068	0.0128739	0.13662	NW_006271970.1	-	-	opiNOG60438	S	-	hypothetical protein	18164024	-	-	-	-
CCM_06802	4801.47	1952.48	-1.29817	0.0128836	0.13662	NW_006271973.1	-	-	-	-	-	hypothetical protein	18168813	-	-	-	-
CCM_06273	99.2501	39.0713	-1.34496	0.0135254	0.14121	NW_006271972.1	GO:0016021	-	sorNOG02517;sordNOG09005	S	-	DUF1275 domain protein	18168288	-	GO:0016021//integral component of membrane;	-	-
CCM_00880	73.7138	32.6896	-1.1731	0.0139173	0.143316	NW_006271969.1	GO:0055085;GO:0016020;GO:0015116;GO:0008272	-	sordNOG14118;opiNOG33475;sorNOG05408	SR	-	Cyclin-like F-box	18162914	GO:0055085//transmembrane transport;GO:0008272//sulfate transport;	GO:0016020//membrane;	GO:0015116//sulfate transmembrane transporter activity;	-
CCM_02165	163.871	68.1097	-1.26662	0.0143521	0.146073	NW_006271970.1	GO:0016874;GO:0006464;GO:0016740	K03800	sordNOG09885	H	sp|O13629|LPLA_SCHPO Putative lipoate-protein ligase A OS=Schizosaccharomyces pombe (strain 972 / ATCC 24843) GN=aim22 PE=3 SV=1	lipoate-protein ligase A, putative	18164193	GO:0006464//cellular protein modification process;	-	GO:0016874//ligase activity;GO:0016740//transferase activity;	ko00785(Lipoic acid metabolism)
CCM_06340	42.8484	15.9371	-1.42686	0.0144232	0.146486	NW_006271972.1	-	-	-	-	-	hypothetical protein	18168354	-	-	-	-
CCM_04867	285.352	41.6854	-2.77513	0.0145371	0.147177	NW_006271971.1	GO:0016021	-	sordNOG11262	S	-	hypothetical protein	18166888	-	GO:0016021//integral component of membrane;	-	-
CCM_00626	28.4607	7.48421	-1.92705	0.0147222	0.148582	NW_006271969.1	GO:0016021	-	opiNOG60462;opiNOG35042;sordNOG15170	S	-	hypothetical protein	18162661	-	GO:0016021//integral component of membrane;	-	-
CCM_09245	933.663	238.874	-1.96665	0.0152335	0.151987	NW_006271976.1	GO:0016021	-	opiNOG27902;sordNOG06417	S	-	hypothetical protein	18171248	-	GO:0016021//integral component of membrane;	-	-
CCM_01575	98.5883	47.1299	-1.06478	0.0153722	0.152895	NW_006271969.1	GO:0016787;GO:0008152	-	opiNOG36157	R	sp|B6H2E9|CUTI2_PENRW Probable cutinase 2 OS=Penicillium rubens (strain ATCC 28089 / DSM 1075 / NRRL 1951 / Wisconsin 54-1255) GN=Pc13g05110 PE=3 SV=1	Cutinase	18163606	GO:0008152//metabolic process;	-	GO:0016787//hydrolase activity;	-
CCM_02520	261.664	76.0702	-1.78231	0.0156714	0.15507	NW_006271970.1	GO:0008236;GO:0006508	-	sorNOG06803;opiNOG18413;sordNOG05440	R	sp|B8NM69|USTP_ASPFN Peptidase S41 family protein ustP OS=Aspergillus flavus (strain ATCC 200026 / FGSC A1120 / NRRL 3357 / JCM 12722 / SRRC 167) GN=ustP PE=1 SV=1	pyridine nucleotide-disulfide oxidoreductase family protein	18164547	GO:0006508//proteolysis;	-	GO:0008236//serine-type peptidase activity;	-
CCM_05293	508.771	145.818	-1.80284	0.0159598	0.157081	NW_006271972.1	GO:0003995;GO:0050660;GO:0055114	K00249	pleNOG03416;KOG0141;opiNOG18070;sordNOG06804;sorNOG06386	I	sp|P9WQG2|ACDC_MYCTO Acyl-CoA dehydrogenase fadE12 OS=Mycobacterium tuberculosis (strain CDC 1551 / Oshkosh) GN=fadE12 PE=3 SV=1	acyl-CoA dehydrogenase, putative	18167311	GO:0055114//obsolete oxidation-reduction process;	-	GO:0003995//acyl-CoA dehydrogenase activity;GO:0050660//flavin adenine dinucleotide binding;	ko04936(Alcoholic liver disease);ko03320(PPAR signaling pathway);ko00280(Valine, leucine and isoleucine degradation);ko00071(Fatty acid degradation)
CCM_01414	89.4159	17.7397	-2.33355	0.0164932	0.160286	NW_006271969.1	-	-	opiNOG61318	S	-	hypothetical protein	18163445	-	-	-	-
CCM_01765	402.735	160.492	-1.32733	0.0169457	0.162896	NW_006271969.1	GO:0004497;GO:0055114;GO:0071949	-	opiNOG46730;necNOG09789;sorNOG06360	S	sp|A8LVF4|KMO_SALAI Kynurenine 3-monooxygenase OS=Salinispora arenicola (strain CNS-205) GN=kmo PE=3 SV=1	monooxygenase, putative	18163795	GO:0055114//obsolete oxidation-reduction process;	-	GO:0004497//monooxygenase activity;GO:0071949//FAD binding;	-
CCM_07911	114.101	47.5333	-1.2633	0.0169516	0.162896	NW_006271974.1	GO:0006412;GO:0005840;GO:0003735	K02914	sorNOG05962;sordNOG15297	J	-	hypothetical protein	18169921	GO:0006412//translation;	GO:0005840//ribosome;	GO:0003735//structural constituent of ribosome;	ko03010(Ribosome)
CCM_04656	2843	946.626	-1.58655	0.0171448	0.163752	NW_006271971.1	-	-	opiNOG34400;sordNOG13760	R	-	hypothetical protein	18166678	-	-	-	-
CCM_09499	4316.69	1574.82	-1.45474	0.01724	0.164173	NW_006271977.1	-	-	opiNOG59530;opiNOG46223	S	-	hypothetical protein	18171501	-	-	-	-
CCM_05408	385.032	157.87	-1.28624	0.0181746	0.169591	NW_006271972.1	-	-	opiNOG65128;sordNOG15097;hypNOG02176	S	-	hypothetical protein	18167426	-	-	-	-
CCM_00055	958.605	376.078	-1.3499	0.0183806	0.170807	NW_006271969.1	GO:0055085;GO:0016021	-	opiNOG17406	R	sp|Q0D153|AT331_ASPTN MFS-type transporter ATEG_00331 OS=Aspergillus terreus (strain NIH 2624 / FGSC A1156) GN=ATEG_00331 PE=2 SV=1	multidrug resistance protein fnx1	18162090	GO:0055085//transmembrane transport;	GO:0016021//integral component of membrane;	-	-
CCM_08461	241.296	118.736	-1.02304	0.0187631	0.173113	NW_006271975.1	GO:0016614;GO:0055114;GO:0050660	-	sordNOG08209;sorNOG07148	R	sp|D7UQ40|SOL5_ALTSO Bifunctional solanapyrone synthase OS=Alternaria solani GN=sol5 PE=1 SV=1	FAD binding domain protein	18170468	GO:0055114//obsolete oxidation-reduction process;	-	GO:0016614//oxidoreductase activity, acting on CH-OH group of donors;GO:0050660//flavin adenine dinucleotide binding;	-
CCM_08015	19.3312	0.343676	-5.81374	0.0187908	0.173113	NW_006271974.1	-	-	COG1073;opiNOG21798	R	sp|Q4WAY4|FMAC_ASPFU Polyketide transferase af380 OS=Neosartorya fumigata (strain ATCC MYA-4609 / Af293 / CBS 101355 / FGSC A1100) GN=af380 PE=1 SV=1	DltD N-terminal domain protein	18170024	-	-	-	-
CCM_02087	387.975	176.284	-1.13806	0.0189249	0.173352	NW_006271970.1	GO:0016787;GO:0016021	K12350	sordNOG09160;sorNOG05341;opiNOG14637	GI	sp|Q23498|ASM2_CAEEL Sphingomyelin phosphodiesterase 2 OS=Caenorhabditis elegans GN=asm-2 PE=1 SV=3	acid sphingomyelinase, putative	18164116	-	GO:0016021//integral component of membrane;	GO:0016787//hydrolase activity;	ko04217(Necroptosis);ko04142(Lysosome);ko04071(Sphingolipid signaling pathway);ko00600(Sphingolipid metabolism)
CCM_01248	37.6068	7.81671	-2.26636	0.0192365	0.17515	NW_006271969.1	-	-	NOG05350	S	-	necrosis-inducing protein	18163279	-	-	-	-
CCM_08743	30.7509	9.18519	-1.74324	0.0202137	0.180515	NW_006271975.1	-	-	-	-	-	hypothetical protein	18170748	-	-	-	-
CCM_09353	673.904	30.4459	-4.46822	0.0211519	0.185112	NW_006271977.1	-	-	sordNOG15295	R	-	hypothetical protein	18171356	-	-	-	-
CCM_05423	3651.31	1528.88	-1.25594	0.0212978	0.185883	NW_006271972.1	GO:0008152;GO:0003824	-	onyNOG06396;COG0318;NOG12813	I	sp|G3XMC0|AZAF_ASPNA Acyl-CoA ligase azaF OS=Aspergillus niger (strain ATCC 1015 / CBS 113.46 / FGSC A1144 / LSHB Ac4 / NCTC 3858a / NRRL 328 / USDA 3528.7) GN=azaF PE=2 SV=1	AMP-binding enzyme, putative	18167441	GO:0008152//metabolic process;	-	GO:0003824//catalytic activity;	-
CCM_04688	555.758	229.811	-1.27401	0.0218579	0.189567	NW_006271971.1	-	-	sordNOG14293	S	-	hypothetical protein	18166710	-	-	-	-
CCM_07042	93.6193	46.6777	-1.00407	0.0230387	0.196328	NW_006271973.1	GO:0016021;GO:0055085	K01533	opiNOG21866;hypNOG08574;sordNOG10509	SPR	sp|S0ECK8|FUJ4_GIBF5 Fujikurins efflux protein FFUJ_12242 OS=Gibberella fujikuroi (strain CBS 195.34 / IMI 58289 / NRRL A-6831) GN=FFUJ_12242 PE=2 SV=1	Major facilitator superfamily transporter	18169053	GO:0055085//transmembrane transport;	GO:0016021//integral component of membrane;	-	-
CCM_08004	77.5793	31.2013	-1.31406	0.0235118	0.197853	NW_006271974.1	GO:0006357;GO:0008270;GO:0005634;GO:0000981	-	sordNOG11044;opiNOG46349	S	sp|Q5A4F3|AHR1_CANAL Adhesion and hyphal regulator 1 OS=Candida albicans (strain SC5314 / ATCC MYA-2876) GN=AHR1 PE=1 SV=1	C6 zinc finger domain protein	18170014	GO:0006357//regulation of transcription by RNA polymerase II;	GO:0005634//nucleus;	GO:0008270//zinc ion binding;GO:0000981//DNA-binding transcription factor activity, RNA polymerase II-specific;	-
CCM_01734	1768.13	748.183	-1.24076	0.0241086	0.200435	NW_006271969.1	GO:0052591;GO:0055114;GO:0006072;GO:0009331	K00111	COG0578;opiNOG04524	C	sp|A7DZP8|GPDM_MESAU Glycerol-3-phosphate dehydrogenase, mitochondrial OS=Mesocricetus auratus GN=GPD2 PE=1 SV=1	glycerol-3-phosphate dehydrogenase	18163764	GO:0055114//obsolete oxidation-reduction process;GO:0006072//glycerol-3-phosphate metabolic process;	GO:0009331//glycerol-3-phosphate dehydrogenase complex;	GO:0052591//sn-glycerol-3-phosphate:ubiquinone-8 oxidoreductase activity;	ko00564(Glycerophospholipid metabolism)
CCM_07881	1073.35	213.09	-2.33258	0.0241986	0.200711	NW_006271974.1	GO:0032259;GO:0008171	-	opiNOG58957;COG4122	SR	sp|Q00719|MDMC_STRMY O-methyltransferase MdmC OS=Streptomyces mycarofaciens GN=mdmC PE=3 SV=1	O-methyltransferase, putative	18169891	GO:0032259//methylation;	-	GO:0008171//O-methyltransferase activity;	-
CCM_08500	69.3091	26.3904	-1.39303	0.0242072	0.200711	NW_006271975.1	-	-	opiNOG44641;necNOG12242;hypNOG03213;sordNOG14015	R	-	hypothetical protein	18170507	-	-	-	-
CCM_01455	257.846	77.8949	-1.72691	0.025654	0.209447	NW_006271969.1	-	-	sordNOG04038	S	sp|P39992|YEC3_YEAST Uncharacterized protein YEL023C OS=Saccharomyces cerevisiae (strain ATCC 204508 / S288c) GN=YEL023C PE=4 SV=1	peptidoglycan binding domain containing protein	18163486	-	-	-	-
CCM_02214	148.748	66.1631	-1.16877	0.0257529	0.209487	NW_006271970.1	GO:1990429;GO:0008270;GO:0005783;GO:0016558;GO:0004842;GO:0000209;GO:0005779	K13346	opiNOG11134;sordNOG04327	O	sp|Q54S31|PEX10_DICDI Peroxisome biogenesis factor 10 OS=Dictyostelium discoideum GN=pex10 PE=3 SV=2	peroxisome assembly protein 10	18164241	GO:0016558//protein import into peroxisome matrix;GO:0000209//protein polyubiquitination;	GO:1990429//peroxisomal importomer complex;GO:0005783//endoplasmic reticulum;GO:0005779//integral component of peroxisomal membrane;	GO:0008270//zinc ion binding;GO:0004842//ubiquitin-protein transferase activity;	ko04146(Peroxisome)
CCM_09114	96956.8	31762.9	-1.61	0.0257854	0.209487	NW_006271976.1	GO:0055114;GO:0016627;GO:0046872	-	opiNOG05243;KOG0137	I	sp|Q8J130|TYRO_ASPFU Tyrosinase OS=Neosartorya fumigata (strain ATCC MYA-4609 / Af293 / CBS 101355 / FGSC A1100) GN=tyr1 PE=3 SV=2	Di-copper centre-containing	18171117	GO:0055114//obsolete oxidation-reduction process;	-	GO:0016627//oxidoreductase activity, acting on the CH-CH group of donors;GO:0046872//metal ion binding;	-
CCM_01994	24.2304	7.53075	-1.68595	0.0262449	0.212121	NW_006271970.1	-	-	sordNOG11185;opiNOG49234	GS	-	hypothetical protein	18164023	-	-	-	-
CCM_01481	1922.37	661.277	-1.53956	0.0264325	0.212921	NW_006271969.1	GO:0006357;GO:0008270;GO:0005634;GO:0000981	-	sordNOG05527;hypNOG10808;opiNOG08613	SC	-	Fungal transcriptional regulatory protein	18163512	GO:0006357//regulation of transcription by RNA polymerase II;	GO:0005634//nucleus;	GO:0008270//zinc ion binding;GO:0000981//DNA-binding transcription factor activity, RNA polymerase II-specific;	-
CCM_07435	1349.12	538.53	-1.32493	0.0267293	0.214041	NW_006271974.1	GO:0071949;GO:0016021;GO:0004497;GO:0055114	-	opiNOG21607;sordNOG07434	SHC	sp|P15245|PHHY_TRICU Phenol hydroxylase OS=Trichosporon cutaneum PE=1 SV=3	phenol 2-monooxygenase	18169446	GO:0055114//obsolete oxidation-reduction process;	GO:0016021//integral component of membrane;	GO:0071949//FAD binding;GO:0004497//monooxygenase activity;	-
CCM_05199	657.771	328.272	-1.0027	0.0268873	0.214429	NW_006271972.1	GO:0003735;GO:0005763;GO:0006412;GO:0003723	K02988	sordNOG07324	J	sp|P33759|RT05_YEAST 37S ribosomal protein S5, mitochondrial OS=Saccharomyces cerevisiae (strain ATCC 204508 / S288c) GN=MRPS5 PE=1 SV=1	37S ribosomal protein S5	18167218	GO:0006412//translation;	GO:0005763//mitochondrial small ribosomal subunit;	GO:0003735//structural constituent of ribosome;GO:0003723//RNA binding;	ko03010(Ribosome)
CCM_08989	18660	7146.53	-1.38463	0.0270398	0.215289	NW_006271975.1	GO:0055114;GO:0016491	K13366	opiNOG02620;KOG0029	Q	sp|O64411|PAO_MAIZE Polyamine oxidase OS=Zea mays GN=PAO PE=1 SV=1	flavin containing polyamine oxidase, putative	18170993	GO:0055114//obsolete oxidation-reduction process;	-	GO:0016491//oxidoreductase activity;	ko00410(beta-Alanine metabolism);ko00330(Arginine and proline metabolism)
CCM_05868	28.7173	9.86293	-1.54183	0.0277435	0.217675	NW_006271972.1	GO:0030170;GO:0009058;GO:0008483	-	opiNOG04127	E	sp|D4AU29|SWNA_ARTBC Aminotransferase swnA OS=Arthroderma benhamiae (strain ATCC MYA-4681 / CBS 112371) GN=swnA PE=3 SV=1	aromatic aminotransferase Aro8, putative	18167886	GO:0009058//biosynthetic process;	-	GO:0030170//pyridoxal phosphate binding;GO:0008483//transaminase activity;	-
CCM_05487	626.633	191.848	-1.70766	0.027817	0.217675	NW_006271972.1	-	-	hypNOG14153;sordNOG15248	S	-	hypothetical protein	18167505	-	-	-	-
CCM_00791	1191.99	231.164	-2.36638	0.0281402	0.218975	NW_006271969.1	GO:0030245;GO:0008422;GO:0102483	K05349	sordNOG06647;sordNOG09567	G	sp|A5ABF5|BGLM_ASPNC Probable beta-glucosidase M OS=Aspergillus niger (strain CBS 513.88 / FGSC A1513) GN=bglM PE=3 SV=1	glycosyl hydrolase, putative	18162825	GO:0030245//cellulose catabolic process;	-	GO:0008422//beta-glucosidase activity;GO:0102483//scopolin beta-glucosidase activity;	ko00940(Phenylpropanoid biosynthesis);ko00500(Starch and sucrose metabolism);ko00460(Cyanoamino acid metabolism)
CCM_09329	6020.21	2688.52	-1.163	0.028336	0.219914	NW_006271976.1	GO:0016021	-	sordNOG15553;opiNOG23998	S	-	Regulator of G protein signaling superfamily	18171332	-	GO:0016021//integral component of membrane;	-	-
CCM_09029	76.7249	23.6339	-1.69884	0.0285579	0.220973	NW_006271975.1	GO:0016884;GO:0016740	K09117	opiNOG33497;sordNOG14079	S	sp|B2WMX8|AIM41_PYRTR Altered inheritance of mitochondria protein 41, mitochondrial OS=Pyrenophora tritici-repentis (strain Pt-1C-BFP) GN=AIM41 PE=3 SV=1	Aspartyl/glutamyl-tRNA amidotransferase subunit B, putative	18171033	-	-	GO:0016884//carbon-nitrogen ligase activity, with glutamine as amido-N-donor;GO:0016740//transferase activity;	-
CCM_08087	3056.5	632.359	-2.27306	0.0291388	0.224027	NW_006271974.1	GO:0003824;GO:0000287;GO:0030976	-	sordNOG07472;opiNOG21935	S	sp|P20906|MDLC_PSEPU Benzoylformate decarboxylase OS=Pseudomonas putida GN=mdlC PE=1 SV=2	acetolactate synthase	18170096	-	-	GO:0003824//catalytic activity;GO:0000287//magnesium ion binding;GO:0030976//thiamine pyrophosphate binding;	-
CCM_02496	325.182	152.3	-1.09433	0.0294022	0.225119	NW_006271970.1	-	-	sordNOG11912;sordNOG15576;opiNOG51497	S	-	hypothetical protein	18164523	-	-	-	-
CCM_07471	1480.86	504.403	-1.55378	0.0301546	0.228548	NW_006271974.1	GO:0004568;GO:0000272;GO:0005576;GO:0006032	K01183	COG3325;sordNOG09987	G	sp|P32470|CHI1_APHAL Chitinase 1 OS=Aphanocladium album GN=CHI1 PE=1 SV=2	chitinase 1 precursor	18169482	GO:0000272//polysaccharide catabolic process;GO:0006032//chitin catabolic process;	GO:0005576//extracellular region;	GO:0004568//chitinase activity;	ko00520(Amino sugar and nucleotide sugar metabolism)
CCM_08207	60.652	21.8126	-1.47539	0.0303465	0.229821	NW_006271974.1	GO:0005975;GO:0004565	-	sorNOG07288;opiNOG04358	G	sp|P48982|BGAL_XANMN Beta-galactosidase OS=Xanthomonas manihotis GN=bga PE=1 SV=1	beta-calactosidase, putative	18170215	GO:0005975//carbohydrate metabolic process;	-	GO:0004565//beta-galactosidase activity;	-
CCM_01148	859.365	384.715	-1.15948	0.0307107	0.231667	NW_006271969.1	GO:0043565;GO:0006355;GO:0003700	-	sordNOG15832;opiNOG46882;sordNOG15127	SK	-	Basic leucine zipper	18163180	GO:0006355//regulation of transcription, DNA-templated;	-	GO:0043565//sequence-specific DNA binding;GO:0003700//DNA-binding transcription factor activity;	-
CCM_04348	293.637	144.842	-1.01955	0.0315997	0.23668	NW_006271971.1	GO:0016021	-	-	-	-	putative membrane protein	18166371	-	GO:0016021//integral component of membrane;	-	-
CCM_07721	129.301	25.1527	-2.36196	0.0319715	0.238424	NW_006271974.1	GO:0008237;GO:0006508	-	opiNOG11422;sorNOG03848;euNOG02355	OW	sp|A4RGT4|MEP1_MAGO7 Extracellular metalloprotease MGG_08041 OS=Magnaporthe oryzae (strain 70-15 / ATCC MYA-4617 / FGSC 8958) GN=MGG_08041 PE=3 SV=1	metalloprotease MEP1-like protein	18169731	GO:0006508//proteolysis;	-	GO:0008237//metallopeptidase activity;	-
CCM_05951	180.476	82.5502	-1.12846	0.0322164	0.239298	NW_006271972.1	GO:0005506;GO:0019439;GO:0051537;GO:0055114;GO:0016708	-	sordNOG10594;COG4638;opiNOG02374	PRS	sp|P0ABR8|YEAW_ECO57 Putative dioxygenase subunit alpha YeaW OS=Escherichia coli O157:H7 GN=yeaW PE=3 SV=1	iron-sulfur cluster-binding protein, rieske family domain protein	18167969	GO:0019439//aromatic compound catabolic process;GO:0055114//obsolete oxidation-reduction process;	-	GO:0005506//iron ion binding;GO:0051537//2 iron, 2 sulfur cluster binding;GO:0016708//oxidoreductase activity, acting on paired donors, with incorporation or reduction of molecular oxygen, NAD(P)H as one donor, and incorporation of two atoms of oxygen into one donor;	-
CCM_06271	78.8197	38.4451	-1.03576	0.0322199	0.239298	NW_006271972.1	GO:0004190;GO:0006508;GO:0030246	-	opiNOG28582;opiNOG28710	R	sp|P24665|PRTA_ASPNG Aspergillopepsin-2 OS=Aspergillus niger PE=1 SV=1	Concanavalin A-like lectin/glucanase	18168286	GO:0006508//proteolysis;	-	GO:0004190//aspartic-type endopeptidase activity;GO:0030246//carbohydrate binding;	-
CCM_02746	46.5894	12.9888	-1.84274	0.0324241	0.240629	NW_006271970.1	-	-	sorNOG08722;opiNOG46756	R	-	hypothetical protein	18164773	-	-	-	-
CCM_05224	4278.86	370.526	-3.52958	0.0325685	0.241259	NW_006271972.1	GO:0006508;GO:0004190	-	sordNOG08190;opiNOG28582	R	sp|P24665|PRTA_ASPNG Aspergillopepsin-2 OS=Aspergillus niger PE=1 SV=1	aspergillopepsin, putative	18167243	GO:0006508//proteolysis;	-	GO:0004190//aspartic-type endopeptidase activity;	-
CCM_02069	119.025	45.1021	-1.4	0.0327293	0.241259	NW_006271970.1	-	-	-	-	-	hypothetical protein	18164098	-	-	-	-
CCM_01362	78.5426	26.9196	-1.54482	0.0327772	0.241259	NW_006271969.1	GO:1902600;GO:0004129;GO:0005739	K18179	sordNOG15736;opiNOG41566	S	sp|G2TRP6|COA6_SCHPO Cytochrome c oxidase subunit 6B-like protein new16 OS=Schizosaccharomyces pombe (strain 972 / ATCC 24843) GN=new16 PE=2 SV=1	Cytochrome c oxidase, subunit VIb	18163393	GO:1902600//proton transmembrane transport;	GO:0005739//mitochondrion;	GO:0004129//cytochrome-c oxidase activity;	ko04714(Thermogenesis)
CCM_09674	53.3268	18.0623	-1.56188	0.0332768	0.243574	NW_006271978.1	GO:0016021;GO:0055085	-	opiNOG14145;hypNOG07461;opiNOG08874	G	sp|Q5ATG7|APDF_EMENI Aspyridones efflux protein apdF OS=Emericella nidulans (strain FGSC A4 / ATCC 38163 / CBS 112.46 / NRRL 194 / M139) GN=apdF PE=2 SV=1	Major facilitator superfamily transporter	18171676	GO:0055085//transmembrane transport;	GO:0016021//integral component of membrane;	-	-
CCM_08192	425.295	185.761	-1.19502	0.033537	0.244968	NW_006271974.1	GO:0003677	-	hypNOG01539;sordNOG12688;opiNOG33435	R	-	hypothetical protein	18170201	-	-	GO:0003677//DNA binding;	-
CCM_04395	5848.87	499.695	-3.54904	0.0335437	0.244968	NW_006271971.1	GO:0055085;GO:0016021	-	sorNOG03283;opiNOG52588;opiNOG23493;sordNOG07923	T	sp|Q06593|OPT2_YEAST Oligopeptide transporter 2 OS=Saccharomyces cerevisiae (strain ATCC 204508 / S288c) GN=OPT2 PE=1 SV=1	Oligopeptide transporter OPT superfamily	18166418	GO:0055085//transmembrane transport;	GO:0016021//integral component of membrane;	-	-
CCM_00405	63.8177	17.9656	-1.82872	0.0337962	0.245879	NW_006271969.1	-	-	sordNOG13600	R	-	hypothetical protein	18162440	-	-	-	-
CCM_00027	29.4198	7.83439	-1.90889	0.0371781	0.260816	NW_006271969.1	-	-	opiNOG41254;sordNOG14152	S	-	hypothetical protein	18162062	-	-	-	-
CCM_03029	4040.51	1872.15	-1.10984	0.0379647	0.263592	NW_006271970.1	GO:0004252;GO:0006508	K01279	COG4934;opiNOG14582	O	sp|Q70GH4|SED3_ASPFU Tripeptidyl-peptidase sed3 OS=Neosartorya fumigata (strain ATCC MYA-4609 / Af293 / CBS 101355 / FGSC A1100) GN=sed3 PE=1 SV=1	tripeptidyl peptidase SED3	18165056	GO:0006508//proteolysis;	-	GO:0004252//serine-type endopeptidase activity;	ko04142(Lysosome)
CCM_07001	121.813	56.6891	-1.10352	0.0389822	0.268191	NW_006271973.1	GO:0008080	-	COG0454;opiNOG42123	RK	-	GNAT family N-acetyltransferase, putative	18169012	-	-	GO:0008080//N-acetyltransferase activity;	-
CCM_06589	517.603	244.471	-1.08218	0.0390486	0.268264	NW_006271973.1	-	-	opiNOG23351;opiNOG48105	S	-	hypothetical protein	18168603	-	-	-	-
CCM_06857	53.1779	24.8721	-1.0963	0.03908	0.268288	NW_006271973.1	GO:0016021	-	sordNOG15776;opiNOG37860	S	-	hypothetical protein	18168868	-	GO:0016021//integral component of membrane;	-	-
CCM_04462	79.8468	32.7372	-1.2863	0.0394346	0.26976	NW_006271971.1	-	-	-	-	-	hypothetical protein	18166485	-	-	-	-
CCM_08510	593.215	273.87	-1.11506	0.039794	0.271292	NW_006271975.1	GO:0055085;GO:0016021	-	opiNOG22079;sordNOG07159;hypNOG05678;COG0530	P	sp|Q0ZAI3|CAXA_ALKAM Putative antiporter CaxA OS=Alkalimonas amylolytica GN=caxA PE=3 SV=1	Sodium/calcium exchanger membrane region	18170517	GO:0055085//transmembrane transport;	GO:0016021//integral component of membrane;	-	-
CCM_05599	6591.03	3137.71	-1.07079	0.0404169	0.273336	NW_006271972.1	GO:0003700;GO:0003677;GO:0016021;GO:0006355	-	opiNOG21500;sordNOG09781	S	sp|Q9C2N1|VIB1_NEUCR Transcription factor vib-1 OS=Neurospora crassa (strain ATCC 24698 / 74-OR23-1A / CBS 708.71 / DSM 1257 / FGSC 987) GN=vib-1 PE=4 SV=1	acid phosphatase phoG-Penicillium chrysogenum	18167617	GO:0006355//regulation of transcription, DNA-templated;	GO:0016021//integral component of membrane;	GO:0003700//DNA-binding transcription factor activity;GO:0003677//DNA binding;	-
CCM_02488	22.7872	7.4946	-1.6043	0.0425777	0.283586	NW_006271970.1	-	-	opiNOG46963	R	-	TrkA-N domain dehydrogenase, putative	18164515	-	-	-	-
CCM_01516	12.9947	2.73512	-2.24825	0.0427906	0.284586	NW_006271969.1	GO:0033961	-	COG0596;sordNOG09161	R	sp|Q06816|HYEP_STIAD Putative epoxide hydrolase OS=Stigmatella aurantiaca (strain DW4/3-1) GN=STAUR_4299 PE=3 SV=2	epoxide hydrolase 1	18163547	-	-	GO:0033961//cis-stilbene-oxide hydrolase activity;	-
CCM_01700	1516.12	658.921	-1.20221	0.0432045	0.286777	NW_006271969.1	GO:0016884	K01426	sorNOG06853;sordNOG09718	J	sp|Q9URY4|YI01_SCHPO Putative amidase C869.01 OS=Schizosaccharomyces pombe (strain 972 / ATCC 24843) GN=SPAC869.01 PE=3 SV=1	amidase family protein	18163730	-	-	GO:0016884//carbon-nitrogen ligase activity, with glutamine as amido-N-donor;	ko00643(Styrene degradation);ko00627(Aminobenzoate degradation);ko00380(Tryptophan metabolism);ko00360(Phenylalanine metabolism);ko00330(Arginine and proline metabolism)
CCM_08793	5238.43	1332.61	-1.97488	0.0433793	0.287358	NW_006271975.1	-	-	necNOG12294	S	-	hypothetical protein	18170798	-	-	-	-
CCM_02070	119.584	29.2529	-2.03137	0.0434608	0.287487	NW_006271970.1	-	-	-	-	-	hypothetical protein	18164099	-	-	-	-
CCM_06586	902.045	278.359	-1.69625	0.044389	0.291821	NW_006271973.1	GO:0006508;GO:0004185	-	sordNOG06862	EO	sp|P34946|CPS1_PENJA Carboxypeptidase S1 OS=Penicillium janthinellum PE=1 SV=1	carboxypeptidase S1, putative	18168600	GO:0006508//proteolysis;	-	GO:0004185//serine-type carboxypeptidase activity;	-
CCM_08593	9988.15	4040.2	-1.30579	0.0446496	0.292534	NW_006271975.1	-	-	sordNOG07590	S	-	hypothetical protein	18170599	-	-	-	-
CCM_06091	13.5425	3.07958	-2.13669	0.0448978	0.293161	NW_006271972.1	GO:0050660;GO:0055114;GO:0016614	K19069	opiNOG48564;pleNOG04789	R	sp|Q01738|CDH_PHACH Cellobiose dehydrogenase OS=Phanerochaete chrysosporium GN=CDH-1 PE=1 SV=1	cellobiose dehydrogenase	18168106	GO:0055114//obsolete oxidation-reduction process;	-	GO:0050660//flavin adenine dinucleotide binding;GO:0016614//oxidoreductase activity, acting on CH-OH group of donors;	-
CCM_04300	1042.37	265.329	-1.97402	0.0460546	0.297351	NW_006271971.1	GO:0055085;GO:0016021	K19792	opiNOG04453;COG5478;sordNOG08180	SP	sp|P40988|FET4_YEAST Low-affinity Fe(2+) transport protein OS=Saccharomyces cerevisiae (strain ATCC 204508 / S288c) GN=FET4 PE=1 SV=2	low affinity iron transporter, putative	18166323	GO:0055085//transmembrane transport;	GO:0016021//integral component of membrane;	-	-
CCM_00002	2437.21	608.731	-2.00136	0.046219	0.298145	NW_006271969.1	GO:0055085;GO:0016021	-	sordNOG11594	R	sp|Q08280|BSC6_YEAST Bypass of stop codon protein 6 OS=Saccharomyces cerevisiae (strain ATCC 204508 / S288c) GN=BSC6 PE=1 SV=1	MFS efflux transporter, putative	18162037	GO:0055085//transmembrane transport;	GO:0016021//integral component of membrane;	-	-
CCM_00186	66.7926	31.7644	-1.07228	0.0469107	0.300391	NW_006271969.1	GO:0016021;GO:0022891;GO:0055085;GO:0008643	-	opiNOG50298;opiNOG56052;hypNOG08838	R	sp|P15325|QUTD_EMENI Quinate permease OS=Emericella nidulans (strain FGSC A4 / ATCC 38163 / CBS 112.46 / NRRL 194 / M139) GN=qutD PE=1 SV=2	sugar transporter, putative	18162221	GO:0055085//transmembrane transport;GO:0008643//carbohydrate transport;	GO:0016021//integral component of membrane;	-	-
CCM_02377	414.246	99.3129	-2.06043	0.0474672	0.303349	NW_006271970.1	GO:0055085;GO:0016021	-	opiNOG03870	G	sp|Q9US44|YIZG_SCHPO Uncharacterized transporter C1002.16c OS=Schizosaccharomyces pombe (strain 972 / ATCC 24843) GN=SPAC1002.16c PE=3 SV=1	Major facilitator superfamily transporter	18164404	GO:0055085//transmembrane transport;	GO:0016021//integral component of membrane;	-	-
CCM_06272	132.064	7.17327	-4.20246	0.0490721	0.310306	NW_006271972.1	GO:0050525;GO:0008152;GO:0005576	K08095	sordNOG13469;opiNOG51281	R	sp|Q9Y7G8|CUTI_PYRBR Cutinase OS=Pyrenopeziza brassicae PE=3 SV=1	cutinase precursor, putative	18168287	GO:0008152//metabolic process;	GO:0005576//extracellular region;	GO:0050525//cutinase activity;	-
CCM_03883	259.495	113.382	-1.19452	0.0492573	0.31066	NW_006271971.1	GO:0055114;GO:0016491	K22745	hypNOG11433;COG0446;opiNOG45809	RC	sp|A1A653|FER8_USTMA Fe-regulated protein 8 OS=Ustilago maydis (strain 521 / FGSC 9021) GN=fer8 PE=2 SV=1	apoptosis-inducing factor, putative	18165906	GO:0055114//obsolete oxidation-reduction process;	-	GO:0016491//oxidoreductase activity;	ko04115(p53 signaling pathway)
CCM_09041	65.4325	31675.8	8.91916	1.56858e-110	1.50866e-106	NW_006271975.1	GO:0008152;GO:0016874	-	sordNOG13532;sorNOG06812;opiNOG29960	I	sp|Q42982|4CL2_ORYSJ Probable 4-coumarate--CoA ligase 2 OS=Oryza sativa subsp. japonica GN=4CL2 PE=2 SV=2	AMP dependent CoA ligase, putative	18171045	GO:0008152//metabolic process;	-	GO:0016874//ligase activity;	-
CCM_02531	108.385	19127.9	7.46337	7.39945e-89	3.5584e-85	NW_006271970.1	GO:0005634;GO:0008270;GO:0006351;GO:0003677	-	sordNOG06328	S	sp|D7UQ41|SOL4_ALTSO Probable transcription factor sol4 OS=Alternaria solani GN=sol4 PE=4 SV=1	Fungal specific transcription factor	18164558	GO:0006351//transcription, DNA-templated;	GO:0005634//nucleus;	GO:0008270//zinc ion binding;GO:0003677//DNA binding;	-
CCM_04514	136.569	13274	6.60283	9.70531e-75	2.33364e-71	NW_006271971.1	-	-	sordNOG15620;COG2202	ST	sp|Q01371|WC1_NEUCR White collar 1 protein OS=Neurospora crassa (strain ATCC 24698 / 74-OR23-1A / CBS 708.71 / DSM 1257 / FGSC 987) GN=wc-1 PE=1 SV=2	GATA transcription factor LreA	18166537	-	-	-	-
CCM_09040	63.284	3556.86	5.81262	4.19118e-59	8.06214e-56	NW_006271975.1	GO:0016021;GO:0055085	-	sorNOG06303;opiNOG13884	R	sp|Q2UPC1|ACLA_ASPOR MFS efflux transporter aclA OS=Aspergillus oryzae (strain ATCC 42149 / RIB 40) GN=aclA PE=3 SV=1	MFS multidrug transporter, putative	18171044	GO:0055085//transmembrane transport;	GO:0016021//integral component of membrane;	-	-
CCM_05702	126.569	4910.3	5.27781	3.40234e-53	5.45395e-50	NW_006271972.1	-	K03098	sordNOG12717;opiNOG28862;sorNOG07779	RLM	-	Calycin-like protein	18167720	-	-	-	-
CCM_06056	551.44	31680.1	5.84423	1.84493e-50	2.53493e-47	NW_006271972.1	GO:0035672;GO:0015421;GO:0016021;GO:0005737;GO:0051286;GO:1990847;GO:0032153;GO:0005524	K05658	sordNOG04851	Q	sp|P12866|STE6_YEAST Alpha-factor-transporting ATPase OS=Saccharomyces cerevisiae (strain ATCC 204508 / S288c) GN=STE6 PE=1 SV=1	a-Factor sex pheromone exporter	18168071	GO:0035672//oligopeptide transmembrane transport;GO:1990847//obsolete peptide pheromone transmembrane export involved in positive regulation of conjugation with cellular fusion;	GO:0016021//integral component of membrane;GO:0005737//cytoplasm;GO:0051286//cell tip;GO:0032153//cell division site;	GO:0015421//ABC-type oligopeptide transporter activity;GO:0005524//ATP binding;	ko05226(Gastric cancer);ko05206(MicroRNAs in cancer);ko04976(Bile secretion);ko02010(ABC transporters)
CCM_03595	67.2703	1294.59	4.26639	2.50711e-35	3.01417e-32	NW_006271970.1	GO:0015179;GO:0015807;GO:0005887;GO:0015297;GO:0003333	-	opiNOG01812;COG0531	E	sp|Q9ZU50|BAT1_ARATH Amino-acid permease BAT1 OS=Arabidopsis thaliana GN=BAT1 PE=2 SV=2	amino acid/polyamine transporter I	18165621	GO:0015807//L-amino acid transport;GO:0003333//amino acid transmembrane transport;	GO:0005887//integral component of plasma membrane;	GO:0015179//L-amino acid transmembrane transporter activity;GO:0015297//antiporter activity;	-
CCM_09042	337.685	49399.6	7.19268	3.81679e-30	4.07888e-27	NW_006271975.1	GO:0031177;GO:0016740;GO:0008152	-	COG3321;opiNOG54134	QI	sp|Q5SBL6|FSDS_FUSHE Fusaridione A synthetase fsdS OS=Fusarium heterosporum GN=fsdS PE=3 SV=2	polyketide synthase, putative	18171046	GO:0008152//metabolic process;	-	GO:0031177//phosphopantetheine binding;GO:0016740//transferase activity;	-
CCM_07790	992.719	11963.4	3.5911	1.49394e-25	1.43687e-22	NW_006271974.1	GO:0042626;GO:0005524;GO:0016021;GO:0006855;GO:0005886	-	sordNOG05136;opiNOG02145	Q	sp|A0A0D1CZ63|FER6_USTMA Multidrug resistance protein fer6 OS=Ustilago maydis (strain 521 / FGSC 9021) GN=fer6 PE=2 SV=1	multidrug resistance-associated protein 5	18169800	GO:0006855//xenobiotic transmembrane transport;	GO:0016021//integral component of membrane;GO:0005886//plasma membrane;	GO:0042626//ATPase-coupled transmembrane transporter activity;GO:0005524//ATP binding;	-
CCM_05703	822.513	13182.8	4.00248	3.46084e-21	3.02604e-18	NW_006271972.1	GO:0008168;GO:0032259	-	opiNOG07324;sordNOG12146	R	sp|Q5C9L6|CNMT_THLFG (S)-coclaurine N-methyltransferase OS=Thalictrum flavum subsp. glaucum PE=1 SV=1	SAM-dependent methyltransferase	18167721	GO:0032259//methylation;	-	GO:0008168//methyltransferase activity;	-
CCM_07854	236.878	1828.66	2.94857	1.10754e-20	8.1941e-18	NW_006271974.1	GO:0016021	-	-	-	-	hypothetical protein	18169864	-	GO:0016021//integral component of membrane;	-	-
CCM_00834	303.341	2554.32	3.07393	1.18719e-16	7.61226e-14	NW_006271969.1	-	-	opiNOG33303;treNOG09656	S	-	hypothetical protein	18162868	-	-	-	-
CCM_00990	215.609	12267.1	5.83024	2.05141e-16	1.23315e-13	NW_006271969.1	GO:0005737;GO:0016627;GO:0016021;GO:0055114;GO:0006629	-	opiNOG04155;sordNOG08642	IR	-	hypothetical protein	18163023	GO:0055114//obsolete oxidation-reduction process;GO:0006629//lipid metabolic process;	GO:0005737//cytoplasm;GO:0016021//integral component of membrane;	GO:0016627//oxidoreductase activity, acting on the CH-CH group of donors;	-
CCM_09424	759.134	4074.02	2.42403	7.65125e-16	4.32881e-13	NW_006271977.1	GO:0016884	-	sordNOG06224;sordNOG05310	KR	sp|Q9LVH5|OE64C_ARATH Outer envelope protein 64, chloroplastic OS=Arabidopsis thaliana GN=OEP64 PE=1 SV=1	amidase, putative	18171427	-	-	GO:0016884//carbon-nitrogen ligase activity, with glutamine as amido-N-donor;	-
CCM_00774	341.999	3168.12	3.21156	8.01371e-15	4.28199e-12	NW_006271969.1	GO:0003913;GO:0006281	K01669	opiNOG03959;sordNOG09425	TL	sp|Q7SI68|CRYD_NEUCR Putative cryptochrome DASH, mitochondrial OS=Neurospora crassa (strain ATCC 24698 / 74-OR23-1A / CBS 708.71 / DSM 1257 / FGSC 987) GN=cry PE=3 SV=1	cryptochrome DASH	18162808	GO:0006281//DNA repair;	-	GO:0003913//DNA photolyase activity;	-
CCM_09160	232.602	1223.52	2.3951	8.85541e-15	4.4827e-12	NW_006271976.1	-	-	sordNOG15101;sordNOG15176	S	-	hypothetical protein	18171163	-	-	-	-
CCM_07084	3.86271	590.587	7.25639	1.13165e-14	5.44212e-12	NW_006271973.1	GO:0006950;GO:0016021	-	hypNOG04233;sordNOG06213	S	sp|O13780|YEO2_SCHPO Uncharacterized protein C17G6.02c OS=Schizosaccharomyces pombe (strain 972 / ATCC 24843) GN=SPAC17G6.02c PE=4 SV=1	RTA1 like protein	18169095	GO:0006950//response to stress;	GO:0016021//integral component of membrane;	-	-
CCM_03576	952.57	5883.39	2.62675	1.21864e-14	5.58139e-12	NW_006271970.1	GO:0004181;GO:0006508	K01293	opiNOG04243	E	sp|O13968|YE48_SCHPO Uncharacterized carboxypeptidase C24C9.08 OS=Schizosaccharomyces pombe (strain 972 / ATCC 24843) GN=SPAC24C9.08 PE=3 SV=1	vacuolar carboxypeptidase Cps1, putative	18165602	GO:0006508//proteolysis;	-	GO:0004181//metallocarboxypeptidase activity;	-
CCM_04140	418.403	1979.38	2.24208	3.77371e-14	1.6498e-11	NW_006271971.1	-	-	opiNOG32841;sordNOG04689	S	-	hypothetical protein	18166163	-	-	-	-
CCM_07855	13083.8	248974	4.25015	6.41524e-14	2.57091e-11	NW_006271974.1	-	-	-	-	-	RNA binding protein	18169865	-	-	-	-
CCM_03920	120.451	709.422	2.5582	8.43928e-14	3.12188e-11	NW_006271971.1	-	-	sordNOG12856;opiNOG35177;sordNOG12783	S	-	hypothetical protein	18165943	-	-	-	-
CCM_08804	142.172	746.185	2.3919	1.34555e-13	4.62197e-11	NW_006271975.1	-	-	COG0251	J	-	Endoribonuclease L-PSP/chorismate mutase-like protein	18170809	-	-	-	-
CCM_07353	32.6051	516.547	3.98573	1.87564e-13	6.22066e-11	NW_006271974.1	GO:0005737;GO:0000287;GO:0044208;GO:0005525;GO:0004019	K01939	sorNOG02627;sordNOG09078	F	sp|Q7S604|PURA_NEUCR Adenylosuccinate synthetase OS=Neurospora crassa (strain ATCC 24698 / 74-OR23-1A / CBS 708.71 / DSM 1257 / FGSC 987) GN=NCU09789 PE=3 SV=1	adenylosuccinate synthetase	18169364	GO:0044208//'de novo' AMP biosynthetic process;	GO:0005737//cytoplasm;	GO:0000287//magnesium ion binding;GO:0005525//GTP binding;GO:0004019//adenylosuccinate synthase activity;	ko00250(Alanine, aspartate and glutamate metabolism);ko00230(Purine metabolism)
CCM_04511	6184.2	26167.4	2.08111	4.28651e-13	1.37426e-10	NW_006271971.1	GO:0016491;GO:0055114	K00306	opiNOG31274	R	sp|O43029|FAP1_SCHPO L-pipecolate oxidase OS=Schizosaccharomyces pombe (strain 972 / ATCC 24843) GN=fap1 PE=1 SV=1	sarcosine oxidase	18166534	GO:0055114//obsolete oxidation-reduction process;	-	GO:0016491//oxidoreductase activity;	ko04146(Peroxisome);ko00310(Lysine degradation);ko00260(Glycine, serine and threonine metabolism)
CCM_07141	811.543	3519.26	2.11653	1.22026e-12	3.66763e-10	NW_006271973.1	GO:0000981;GO:0005634;GO:0003677;GO:0006357;GO:0008270	-	sordNOG10651	S	sp|P28348|NIRA_EMENI Nitrogen assimilation transcription factor nirA OS=Emericella nidulans (strain FGSC A4 / ATCC 38163 / CBS 112.46 / NRRL 194 / M139) GN=nirA PE=4 SV=1	C6 transcription factor, putative	18169152	GO:0006357//regulation of transcription by RNA polymerase II;	GO:0005634//nucleus;	GO:0000981//DNA-binding transcription factor activity, RNA polymerase II-specific;GO:0003677//DNA binding;GO:0008270//zinc ion binding;	-
CCM_04508	2497.38	10283.6	2.04186	1.89484e-12	5.36018e-10	NW_006271971.1	-	-	hypNOG08145;opiNOG64025	SR	-	hypothetical protein	18166531	-	-	-	-
CCM_00420	471.595	3535.15	2.90615	4.50688e-12	1.23849e-09	NW_006271969.1	-	K00574	sordNOG06517;opiNOG15338	R	sp|O53732|UFAA1_MYCTU Tuberculostearic acid methyltransferase UfaA1 OS=Mycobacterium tuberculosis (strain ATCC 25618 / H37Rv) GN=ufaA1 PE=1 SV=3	methoxy mycolic acid synthase 1	18162455	-	-	-	-
CCM_02751	356.445	1475.97	2.04991	1.61956e-11	4.09919e-09	NW_006271970.1	GO:0016021;GO:0055114;GO:0016628	K00222	sordNOG10146	I	sp|Q01447|ERG24_FUSSO Delta(14)-sterol reductase OS=Fusarium solani subsp. pisi PE=3 SV=1	delta(14)-sterol reductase	18164778	GO:0055114//obsolete oxidation-reduction process;	GO:0016021//integral component of membrane;	GO:0016628//oxidoreductase activity, acting on the CH-CH group of donors, NAD or NADP as acceptor;	ko00100(Steroid biosynthesis)
CCM_08295	531.81	3254.56	2.61348	3.85515e-11	9.50738e-09	NW_006271975.1	GO:0016021	K17991	sordNOG05598;pleNOG05460;opiNOG23153	S	sp|O22788|PXG3_ARATH Probable peroxygenase 3 OS=Arabidopsis thaliana GN=PXG3 PE=1 SV=1	caleosin domain containing protein	18170303	-	GO:0016021//integral component of membrane;	-	ko00073(Cutin, suberine and wax biosynthesis)
CCM_06110	0.36902	214.829	9.18527	4.58177e-11	1.07482e-08	NW_006271972.1	-	-	-	-	-	hypothetical protein	18168125	-	-	-	-
CCM_04506	1762.35	6326.77	1.84397	1.13631e-10	2.37588e-08	NW_006271971.1	-	-	opiNOG56942	S	sp|Q7RX33|EGT1_NEUCR Ergothioneine biosynthesis protein 1 OS=Neurospora crassa (strain ATCC 24698 / 74-OR23-1A / CBS 708.71 / DSM 1257 / FGSC 987) GN=egt-1 PE=1 SV=3	DUF323 domain-containing protein	18166529	-	-	-	-
CCM_02806	99.8505	556.317	2.47807	1.42554e-10	2.89726e-08	NW_006271970.1	GO:0016021;GO:0006950	-	opiNOG18168;hypNOG05026;necNOG11051	S	sp|C8ZI10|RSB1_YEAS8 Sphingoid long-chain base transporter RSB1 OS=Saccharomyces cerevisiae (strain Lalvin EC1118 / Prise de mousse) GN=RSB1 PE=3 SV=1	RTA1 like protein	18164833	GO:0006950//response to stress;	GO:0016021//integral component of membrane;	-	-
CCM_07200	100.823	447.264	2.14931	1.44592e-10	2.89726e-08	NW_006271973.1	-	-	onyNOG01226;eurotNOG10687;opiNOG18078	S	-	hypothetical protein	18169211	-	-	-	-
CCM_09038	9.12273	139.502	3.93468	3.42761e-10	6.59336e-08	NW_006271975.1	GO:0006950;GO:0016021	-	opiNOG56426;opiNOG16708;hypNOG06844	S	sp|P40113|RTM1_YEASX Protein RTM1 OS=Saccharomyces cerevisiae GN=RTM1 PE=3 SV=1	RTA1 like protein	18171042	GO:0006950//response to stress;	GO:0016021//integral component of membrane;	-	-
CCM_08119	17019.3	59103.3	1.79606	5.01791e-10	9.46318e-08	NW_006271974.1	GO:0005524;GO:0006542;GO:0004356	K01915	sordNOG09037	E	sp|Q9UUN6|GLNA_FUSSH Glutamine synthetase OS=Fusarium solani subsp. phaseoli GN=GLN1 PE=2 SV=1	glutamine synthetase	18170128	GO:0006542//glutamine biosynthetic process;	-	GO:0005524//ATP binding;GO:0004356//glutamate-ammonia ligase activity;	ko04727(GABAergic synapse);ko04724(Glutamatergic synapse);ko04217(Necroptosis);ko02020(Two-component system);ko00910(Nitrogen metabolism);ko00630(Glyoxylate and dicarboxylate metabolism);ko00250(Alanine, aspartate and glutamate metabolism);ko00220(Arginine biosynthesis)
CCM_03587	122.766	2517.5	4.358	8.48544e-10	1.56948e-07	NW_006271970.1	GO:0005576;GO:0005975;GO:0030248;GO:0004553	K01183	NOG126988;NOG122945;opiNOG07753	G	sp|E9F9R9|CHI2_METRA Endochitinase 2 OS=Metarhizium robertsii (strain ARSEF 23 / ATCC MYA-3075) GN=chi2 PE=3 SV=2	chitinase 3 precursor, putative	18165613	GO:0005975//carbohydrate metabolic process;	GO:0005576//extracellular region;	GO:0030248//cellulose binding;GO:0004553//hydrolase activity, hydrolyzing O-glycosyl compounds;	ko00520(Amino sugar and nucleotide sugar metabolism)
CCM_02106	2728.59	9486.56	1.79773	9.45895e-10	1.69239e-07	NW_006271970.1	GO:0008171;GO:0032259	-	opiNOG04420;sordNOG05717	R	sp|Q9UQY0|AFLO_ASPPU Demethylsterigmatocystin 6-O-methyltransferase OS=Aspergillus parasiticus (strain ATCC 56775 / NRRL 5862 / SRRC 143 / SU-1) GN=aflO PE=1 SV=2	O-methyltransferase, putative	18164134	GO:0032259//methylation;	-	GO:0008171//O-methyltransferase activity;	-
CCM_04507	3038.56	10155.4	1.74079	9.5019e-10	1.69239e-07	NW_006271971.1	-	-	sordNOG14255	S	-	hypothetical protein	18166530	-	-	-	-
CCM_05075	6.4547	76.6211	3.56932	9.79805e-10	1.71341e-07	NW_006271972.1	-	-	-	-	-	hypothetical protein	18167095	-	-	-	-
CCM_04816	50.1721	267.137	2.41262	2.85714e-09	4.3619e-07	NW_006271971.1	-	-	opiNOG02368;opiNOG22876	R	sp|D4ALG0|LYSM1_ARTBC LysM domain-containing protein ARB_05157 OS=Arthroderma benhamiae (strain ATCC MYA-4681 / CBS 112371) GN=ARB_05157 PE=1 SV=1	LysM domain protein	18166837	-	-	-	-
CCM_07083	2.42911	249.457	6.68221	4.24442e-09	6.18527e-07	NW_006271973.1	-	-	opiNOG75713;opiNOG60480;hypNOG11117	SR	-	SCP-like extracellular	18169094	-	-	-	-
CCM_04059	3077.4	9420.27	1.61406	1.99482e-08	2.59273e-06	NW_006271971.1	GO:0006457;GO:0005829;GO:0051087;GO:0032781;GO:0001671;GO:0006950	-	opiNOG02570;sordNOG06615	S	sp|Q9P782|YNY8_SCHPO Uncharacterized protein C1711.08 OS=Schizosaccharomyces pombe (strain 972 / ATCC 24843) GN=SPBC1711.08 PE=2 SV=1	Activator of Hsp90 ATPase	18166082	GO:0006457//protein folding;GO:0032781//positive regulation of ATP-dependent activity;GO:0006950//response to stress;	GO:0005829//cytosol;	GO:0051087//chaperone binding;GO:0001671//ATPase activator activity;	-
CCM_07874	3075.23	12223.5	1.99089	2.11566e-08	2.71312e-06	NW_006271974.1	-	-	sorNOG08845;sorNOG08840;opiNOG41588	S	sp|Q7S6U4|CVNH_NEUCR Cyanovirin-N homolog OS=Neurospora crassa (strain ATCC 24698 / 74-OR23-1A / CBS 708.71 / DSM 1257 / FGSC 987) GN=NCU05495 PE=1 SV=2	Cyanovirin-N	18169884	-	-	-	-
CCM_02530	35.6155	174.469	2.29239	2.69383e-08	3.40911e-06	NW_006271970.1	GO:0055085;GO:0022857;GO:0016021	-	sordNOG07611;opiNOG03112	P	sp|A0A1D8PN12|GIT2_CANAL Glycerophosphodiester transporter GIT2 OS=Candida albicans (strain SC5314 / ATCC MYA-2876) GN=GIT2 PE=2 SV=1	MFS phospholipid transporter Git1	18164557	GO:0055085//transmembrane transport;	GO:0016021//integral component of membrane;	GO:0022857//transmembrane transporter activity;	-
CCM_06052	1409.27	4373.14	1.63372	2.91413e-08	3.64001e-06	NW_006271972.1	GO:0055085;GO:0016021	-	sordNOG06498	R	sp|O59699|YN42_SCHPO Uncharacterized transporter C36.02c OS=Schizosaccharomyces pombe (strain 972 / ATCC 24843) GN=SPBC36.02c PE=3 SV=1	MFS multidrug transporter, putative	18168067	GO:0055085//transmembrane transport;	GO:0016021//integral component of membrane;	-	-
CCM_03011	2301.61	6825.88	1.56837	3.90309e-08	4.75189e-06	NW_006271970.1	GO:0008270;GO:0006357;GO:0003677;GO:0005634;GO:0000981	-	NOG125814;sordNOG05709	S	sp|Q09922|YAKB_SCHPO Uncharacterized transcriptional regulatory protein C1F7.11c OS=Schizosaccharomyces pombe (strain 972 / ATCC 24843) GN=SPAC1F7.11c PE=4 SV=1	Zn(II)2Cys6 transcription factor	18165038	GO:0006357//regulation of transcription by RNA polymerase II;	GO:0005634//nucleus;	GO:0008270//zinc ion binding;GO:0003677//DNA binding;GO:0000981//DNA-binding transcription factor activity, RNA polymerase II-specific;	-
CCM_03515	1284.79	3868.87	1.59037	4.35422e-08	5.19135e-06	NW_006271970.1	GO:0015171;GO:0016021;GO:0003333	K19564	sordNOG04425	E	sp|P19807|HNM1_YEAST Choline transport protein OS=Saccharomyces cerevisiae (strain ATCC 204508 / S288c) GN=HNM1 PE=1 SV=1	GABA permease, putative	18165541	GO:0003333//amino acid transmembrane transport;	GO:0016021//integral component of membrane;	GO:0015171//amino acid transmembrane transporter activity;	-
CCM_03715	752.541	2307.18	1.61629	4.58312e-08	5.22567e-06	NW_006271971.1	GO:0016788;GO:0009058	-	sordNOG12940;sordNOG12959	S	sp|J4UHQ6|OPS1_BEAB2 Orsellinic acid synthase OS=Beauveria bassiana (strain ARSEF 2860) GN=OpS1 PE=1 SV=1	Thioesterase	18165739	GO:0009058//biosynthetic process;	-	GO:0016788//hydrolase activity, acting on ester bonds;	-
CCM_03777	66.7677	712.612	3.4159	5.2174e-08	5.835e-06	NW_006271971.1	GO:0001077;GO:0060237;GO:0045944;GO:0000978;GO:0005634;GO:0046872;GO:0005829;GO:0071322	-	sordNOG07334;NOG01669	R	-	zinc finger protein OZF	18165800	GO:0060237//regulation of fungal-type cell wall organization;GO:0045944//positive regulation of transcription by RNA polymerase II;GO:0071322//cellular response to carbohydrate stimulus;	GO:0005634//nucleus;GO:0005829//cytosol;	GO:0000978//RNA polymerase II cis-regulatory region sequence-specific DNA binding;GO:0046872//metal ion binding;	-
CCM_06020	100.09	547.454	2.45145	8.04296e-08	8.69182e-06	NW_006271972.1	GO:0004190;GO:0016021;GO:0006508	-	sordNOG06521;sorNOG06357	O	sp|Q8NKB6|OPSB_ASPOR Probable aspartic-type endopeptidase opsB OS=Aspergillus oryzae (strain ATCC 42149 / RIB 40) GN=opsB PE=2 SV=1	Peptidase A1	18168038	GO:0006508//proteolysis;	GO:0016021//integral component of membrane;	GO:0004190//aspartic-type endopeptidase activity;	-
CCM_03459	1226.18	3800.91	1.63217	9.06955e-08	9.69232e-06	NW_006271970.1	GO:0016491;GO:0055114	-	opiNOG22969;sordNOG10321;opiNOG53024	I	-	hypothetical protein	18165485	GO:0055114//obsolete oxidation-reduction process;	-	GO:0016491//oxidoreductase activity;	-
CCM_03402	32.3364	153.815	2.24997	1.02242e-07	1.08062e-05	NW_006271970.1	GO:0016021;GO:0004497;GO:0055114;GO:0016705;GO:0005506;GO:0020037	-	opiNOG21944;sordNOG08926	Q	sp|P0DPA7|PSIH_PSICU Cytochrome P450 monooxygenase psiH OS=Psilocybe cubensis GN=psiH PE=1 SV=1	O-methylsterigmatocystin oxidoreductase, putative	18165428	GO:0055114//obsolete oxidation-reduction process;	GO:0016021//integral component of membrane;	GO:0004497//monooxygenase activity;GO:0016705//oxidoreductase activity, acting on paired donors, with incorporation or reduction of molecular oxygen;GO:0005506//iron ion binding;GO:0020037//heme binding;	-
CCM_06109	0	24.7466	Inf	1.50323e-07	1.53809e-05	NW_006271972.1	-	-	opiNOG34294	S	-	Peroxiredoxin, OsmC-like protein	18168124	-	-	-	-
CCM_02039	62.0712	235.293	1.92246	2.16524e-07	2.12503e-05	NW_006271970.1	-	-	-	-	-	hypothetical protein	18164068	-	-	-	-
CCM_02760	495.755	1448.62	1.54698	3.33894e-07	3.1796e-05	NW_006271970.1	-	-	opiNOG17069;sorNOG05260;sordNOG11793	Q	sp|Q92781|RDH1_HUMAN 11-cis retinol dehydrogenase OS=Homo sapiens GN=RDH5 PE=1 SV=1	3-oxoacyl-(acyl-carrier-protein) reductase	18164787	-	-	-	-
CCM_03765	6.6427	57.9312	3.1245	4.03944e-07	3.77197e-05	NW_006271971.1	-	-	-	-	-	hypothetical protein	18165788	-	-	-	-
CCM_05594	68.7622	6081.36	6.46663	4.0848e-07	3.77765e-05	NW_006271972.1	-	-	sordNOG14962;opiNOG45933;opiNOG45017	S	-	glucose repressible protein Grg1	18167612	-	-	-	-
CCM_01498	957.313	3873.92	2.01673	4.22886e-07	3.87364e-05	NW_006271969.1	GO:0016021	-	opiNOG20622;sordNOG07415	S	-	hypothetical protein	18163529	-	GO:0016021//integral component of membrane;	-	-
CCM_01491	163.436	498.455	1.60874	6.01245e-07	5.45545e-05	NW_006271969.1	-	-	opiNOG67058;opiNOG45053;sordNOG14486	SR	-	hypothetical protein	18163522	-	-	-	-
CCM_02008	929.075	2499.28	1.42765	9.00339e-07	7.87223e-05	NW_006271970.1	GO:0016705;GO:0020037;GO:0005506;GO:0016021;GO:0004497;GO:0055114	-	sordNOG10103;opiNOG21609;opiNOG24895	Q	sp|G3XMC3|AZAI_ASPNA Cytochrome P450 monooxygenase azaI OS=Aspergillus niger (strain ATCC 1015 / CBS 113.46 / FGSC A1144 / LSHB Ac4 / NCTC 3858a / NRRL 328 / USDA 3528.7) GN=azaI PE=2 SV=1	Cytochrome P450	18164037	GO:0055114//obsolete oxidation-reduction process;	GO:0016021//integral component of membrane;	GO:0016705//oxidoreductase activity, acting on paired donors, with incorporation or reduction of molecular oxygen;GO:0020037//heme binding;GO:0005506//iron ion binding;GO:0004497//monooxygenase activity;	-
CCM_06820	79.625	353.097	2.14877	1.07782e-06	9.16144e-05	NW_006271973.1	GO:0000166;GO:0003723	-	sorNOG01944;sordNOG06006	TRA	sp|A9LNK9|CPSF_ARATH 30-kDa cleavage and polyadenylation specificity factor 30 OS=Arabidopsis thaliana GN=CPSF30 PE=1 SV=1	YT521-B-like splicing factor, putative	18168831	-	-	GO:0000166//nucleotide binding;GO:0003723//RNA binding;	-
CCM_01492	3515.74	24017.6	2.77219	1.15625e-06	9.67026e-05	NW_006271969.1	-	-	opiNOG39069;sorNOG05872;sordNOG13034	R	sp|D4B0F8|TLP1_ARTBC Antigenic thaumatin-like protein ARB_01932 OS=Arthroderma benhamiae (strain ATCC MYA-4681 / CBS 112371) GN=ARB_01932 PE=1 SV=2	BYS1 domain-containing protein	18163523	-	-	-	-
CCM_04853	1.20123	37.9371	4.98103	1.21406e-06	0.000100662	NW_006271971.1	-	-	-	-	-	hypothetical protein	18166874	-	-	-	-
CCM_00151	184.435	2391.99	3.69702	1.30592e-06	0.000106484	NW_006271969.1	GO:0016829	K01669	sordNOG09856;opiNOG02695	TL	sp|P27526|PHR_NEUCR Deoxyribodipyrimidine photo-lyase OS=Neurospora crassa (strain ATCC 24698 / 74-OR23-1A / CBS 708.71 / DSM 1257 / FGSC 987) GN=phr PE=3 SV=2	deoxyribodipyrimidine photo-lyase Phr1, putative	18162186	-	-	GO:0016829//lyase activity;	-
CCM_00451	1615.25	7304.37	2.177	1.60271e-06	0.000128457	NW_006271969.1	GO:0008270;GO:0016491;GO:0055114	K13953	opiNOG19540	Q	sp|P07754|ADH3_EMENI Alcohol dehydrogenase 3 OS=Emericella nidulans (strain FGSC A4 / ATCC 38163 / CBS 112.46 / NRRL 194 / M139) GN=alcC PE=3 SV=1	alcohol dehydrogenase	18162486	GO:0055114//obsolete oxidation-reduction process;	-	GO:0008270//zinc ion binding;GO:0016491//oxidoreductase activity;	ko00982(Drug metabolism - cytochrome P450);ko00980(Metabolism of xenobiotics by cytochrome P450);ko00830(Retinol metabolism);ko00626(Naphthalene degradation);ko00625(Chloroalkane and chloroalkene degradation);ko00620(Pyruvate metabolism);ko00350(Tyrosine metabolism);ko00071(Fatty acid degradation);ko00010(Glycolysis / Gluconeogenesis)
CCM_09664	8359.54	21545.1	1.36587	2.18909e-06	0.000168437	NW_006271978.1	GO:0016021	-	-	-	-	hypothetical protein	18171666	-	GO:0016021//integral component of membrane;	-	-
CCM_01380	199.828	580.6	1.53879	2.39418e-06	0.000180818	NW_006271969.1	GO:0006357;GO:0008270;GO:0000981;GO:0005634	-	sorNOG00419;opiNOG35089;sordNOG05294	S	-	mercuric reductase, putative	18163411	GO:0006357//regulation of transcription by RNA polymerase II;	GO:0005634//nucleus;	GO:0008270//zinc ion binding;GO:0000981//DNA-binding transcription factor activity, RNA polymerase II-specific;	-
CCM_06055	599.362	1600.75	1.41725	2.40639e-06	0.000180818	NW_006271972.1	GO:0005829;GO:0005634	-	opiNOG31823;sorNOG04690;sordNOG04975	S	sp|O59727|YHX7_SCHPO Protein PBDC1 homolog OS=Schizosaccharomyces pombe (strain 972 / ATCC 24843) GN=SPBC3E7.07c PE=3 SV=1	DUF757 domain protein	18168070	-	GO:0005829//cytosol;GO:0005634//nucleus;	-	-
CCM_00323	2792.76	7057.47	1.33746	2.61142e-06	0.000194702	NW_006271969.1	-	-	sorNOG05645;opiNOG37723;sordNOG14084	S	-	hypothetical protein	18162358	-	-	-	-
CCM_05377	55.3073	638.823	3.52988	3.51042e-06	0.000253859	NW_006271972.1	-	-	-	-	-	hypothetical protein	18167395	-	-	-	-
CCM_03778	5.2527	61.024	3.53824	3.62604e-06	0.000260263	NW_006271971.1	-	-	-	-	-	hypothetical protein	18165801	-	-	-	-
CCM_02532	353.364	920.023	1.38052	4.51629e-06	0.000317063	NW_006271970.1	GO:0016021;GO:0046873;GO:0055085;GO:0030001	-	sordNOG06798	S	sp|Q9WZ31|CORA_THEMA Cobalt/magnesium transport protein CorA OS=Thermotoga maritima (strain ATCC 43589 / MSB8 / DSM 3109 / JCM 10099) GN=corA PE=1 SV=1	CorA family metal ion transporter, putative	18164559	GO:0055085//transmembrane transport;GO:0030001//metal ion transport;	GO:0016021//integral component of membrane;	GO:0046873//metal ion transmembrane transporter activity;	-
CCM_04692	1017.98	2784.02	1.45146	4.68188e-06	0.000326307	NW_006271971.1	GO:0005388;GO:0000329;GO:0006874;GO:0046872;GO:0070588;GO:0005524;GO:0016021	K01537	opiNOG01657;sordNOG09232	P	sp|Q9HDW7|ATC2_SCHPO Calcium-transporting ATPase 2 OS=Schizosaccharomyces pombe (strain 972 / ATCC 24843) GN=pmc1 PE=3 SV=1	P-type calcium ATPase, putative	18166714	GO:0006874//cellular calcium ion homeostasis;GO:0070588//calcium ion transmembrane transport;	GO:0000329//fungal-type vacuole membrane;GO:0016021//integral component of membrane;	GO:0005388//P-type calcium transporter activity;GO:0046872//metal ion binding;GO:0005524//ATP binding;	-
CCM_01430	272.831	924.671	1.76093	4.99668e-06	0.000343272	NW_006271969.1	GO:0050662;GO:0003824	-	opiNOG03439;sordNOG05428	R	sp|O74482|YQJ9_SCHPO Uncharacterized protein C1840.09 OS=Schizosaccharomyces pombe (strain 972 / ATCC 24843) GN=SPCC1840.09 PE=3 SV=1	NAD dependent epimerase/dehydratase family protein	18163461	-	-	GO:0050662//obsolete coenzyme binding;GO:0003824//catalytic activity;	-
CCM_01015	140.931	1570.16	3.47785	5.35909e-06	0.000357943	NW_006271969.1	-	-	pleNOG08937;opiNOG23821	S	-	hypothetical protein	18163048	-	-	-	-
CCM_03013	508.332	1275.55	1.32727	7.40634e-06	0.000481312	NW_006271970.1	-	-	opiNOG73078;sordNOG06706	S	-	hypothetical protein	18165040	-	-	-	-
CCM_05340	58.7127	372.339	2.66487	7.50668e-06	0.000481328	NW_006271972.1	GO:0016021;GO:0055085	-	opiNOG06381;sordNOG04945	R	sp|P25351|YCR3_YEAST Uncharacterized membrane protein YCR023C OS=Saccharomyces cerevisiae (strain ATCC 204508 / S288c) GN=YCR023C PE=1 SV=2	MFS multidrug transporter, putative	18167358	GO:0055085//transmembrane transport;	GO:0016021//integral component of membrane;	-	-
CCM_06183	81.5153	330.73	2.02051	8.03148e-06	0.000511568	NW_006271972.1	GO:0004527;GO:0090305;GO:0004519	K19619	agaNOG06472;magNOG12728;sordNOG15527;opiNOG29302	RS	-	Endonuclease/exonuclease/phosphatase	18168198	GO:0090305//nucleic acid phosphodiester bond hydrolysis;	-	GO:0004527//exonuclease activity;GO:0004519//endonuclease activity;	-
CCM_02484	2814.29	6985.41	1.31157	8.49852e-06	0.000537755	NW_006271970.1	GO:0008270;GO:0016491;GO:0055114	K13953	sordNOG11412;opiNOG02528;pleNOG02562	Q	sp|Q9P6C8|ADH1_NEUCR Alcohol dehydrogenase 1 OS=Neurospora crassa (strain ATCC 24698 / 74-OR23-1A / CBS 708.71 / DSM 1257 / FGSC 987) GN=adh-1 PE=3 SV=1	alcohol dehydrogenase 1	18164511	GO:0055114//obsolete oxidation-reduction process;	-	GO:0008270//zinc ion binding;GO:0016491//oxidoreductase activity;	ko00982(Drug metabolism - cytochrome P450);ko00980(Metabolism of xenobiotics by cytochrome P450);ko00830(Retinol metabolism);ko00626(Naphthalene degradation);ko00625(Chloroalkane and chloroalkene degradation);ko00620(Pyruvate metabolism);ko00350(Tyrosine metabolism);ko00071(Fatty acid degradation);ko00010(Glycolysis / Gluconeogenesis)
CCM_08205	2275.47	5622.84	1.30514	8.72034e-06	0.000544625	NW_006271974.1	-	-	opiNOG05899;sordNOG04603;opiNOG40025	R	sp|I1RF63|AURS_GIBZE Aurofusarin biosynthesis cluster protein S OS=Gibberella zeae (strain PH-1 / ATCC MYA-4620 / FGSC 9075 / NRRL 31084) GN=aurS PE=1 SV=1	Fasciclin domain family protein	18170213	-	-	-	-
CCM_07027	13.7494	70.8552	2.36551	8.98111e-06	0.000557292	NW_006271973.1	-	-	-	-	-	hypothetical protein	18169038	-	-	-	-
CCM_01128	1124.02	2746.61	1.28899	9.65622e-06	0.000591551	NW_006271969.1	-	-	sordNOG09069;opiNOG10277	S	-	hypothetical protein	18163160	-	-	-	-
CCM_09234	682.288	1692.94	1.31108	1.00193e-05	0.000606072	NW_006271976.1	-	-	magNOG08514	R	-	hypothetical protein	18171237	-	-	-	-
CCM_01055	6.95186	321.048	5.52924	1.03848e-05	0.000624255	NW_006271969.1	-	-	opiNOG43883	S	-	hypothetical protein	18163088	-	-	-	-
CCM_08827	89.2113	264.343	1.56711	1.05335e-05	0.000629259	NW_006271975.1	GO:0051213;GO:0055114	K19245	sorNOG02663;opiNOG04653	I	sp|Q12358|JLP1_YEAST Alpha-ketoglutarate-dependent sulfonate dioxygenase OS=Saccharomyces cerevisiae (strain ATCC 204508 / S288c) GN=JLP1 PE=1 SV=1	Taurine catabolism dioxygenase TauD/TfdA	18170832	GO:0055114//obsolete oxidation-reduction process;	-	GO:0051213//dioxygenase activity;	-
CCM_00677	313.704	1436.91	2.1955	1.1147e-05	0.000657742	NW_006271969.1	GO:0016021	-	NOG42379;opiNOG02845	S	-	hypothetical protein	18162711	-	GO:0016021//integral component of membrane;	-	-
CCM_02009	321.796	835.197	1.37597	1.28502e-05	0.000740082	NW_006271970.1	-	-	sordNOG14882	L	-	hypothetical protein	18164038	-	-	-	-
CCM_08062	1.97401	29.3522	3.89427	1.52269e-05	0.000846544	NW_006271974.1	-	-	-	-	-	hypothetical protein	18170071	-	-	-	-
CCM_05137	51.2556	164.017	1.67806	1.6307e-05	0.000891242	NW_006271972.1	-	-	-	-	-	hypothetical protein	18167157	-	-	-	-
CCM_06911	216.312	783.69	1.85717	1.64318e-05	0.000892887	NW_006271973.1	GO:0015171;GO:0016021;GO:0003333	K16261	opiNOG05794;NOG27385;onyNOG01044	EU	sp|P18696|PUTX_EMENI Proline-specific permease OS=Emericella nidulans (strain FGSC A4 / ATCC 38163 / CBS 112.46 / NRRL 194 / M139) GN=prnB PE=2 SV=2	proline permease PrnB	18168922	GO:0003333//amino acid transmembrane transport;	GO:0016021//integral component of membrane;	GO:0015171//amino acid transmembrane transporter activity;	-
CCM_01265	1.74242	62.7415	5.17026	1.69453e-05	0.000910503	NW_006271969.1	GO:0016491;GO:0010181;GO:0055114	-	sorNOG00032;sordNOG10453;opiNOG27957	HSR	sp|Q01358|BLI3_NEUCR Protein bli-3 OS=Neurospora crassa (strain ATCC 24698 / 74-OR23-1A / CBS 708.71 / DSM 1257 / FGSC 987) GN=bli-3 PE=2 SV=1	protein bli-3	18163296	GO:0055114//obsolete oxidation-reduction process;	-	GO:0016491//oxidoreductase activity;GO:0010181//FMN binding;	-
CCM_08945	2295.3	5444.04	1.24599	1.78408e-05	0.000937668	NW_006271975.1	-	-	sorNOG06066;sordNOG14509;opiNOG60173;magNOG12838	R	-	hypothetical protein	18170949	-	-	-	-
CCM_06295	4543.77	10417	1.19698	2.07688e-05	0.00107395	NW_006271972.1	GO:0071949;GO:0055114;GO:0004497	-	sordNOG11960;opiNOG19219	S	sp|P15245|PHHY_TRICU Phenol hydroxylase OS=Trichosporon cutaneum PE=1 SV=3	phenol 2-monooxygenase	18168310	GO:0055114//obsolete oxidation-reduction process;	-	GO:0071949//FAD binding;GO:0004497//monooxygenase activity;	-
CCM_08302	44.4919	272.474	2.6145	2.26702e-05	0.0011598	NW_006271975.1	GO:0016021	-	opiNOG03174;sordNOG07410	S	-	hypothetical protein	18170310	-	GO:0016021//integral component of membrane;	-	-
CCM_01630	724.173	1708.07	1.23796	2.36543e-05	0.00119741	NW_006271969.1	GO:0003700;GO:0006355;GO:0043565;GO:0008270	-	opiNOG15221;magNOG12919;opiNOG64699	RSK	sp|Q55GK0|GTAE_DICDI GATA zinc finger domain-containing protein 5 OS=Dictyostelium discoideum GN=gtaE PE=4 SV=1	Zinc finger domain-containing protein, GATA-type	18163660	GO:0006355//regulation of transcription, DNA-templated;	-	GO:0003700//DNA-binding transcription factor activity;GO:0043565//sequence-specific DNA binding;GO:0008270//zinc ion binding;	-
CCM_06634	53.2261	166.402	1.64447	2.49215e-05	0.00125495	NW_006271973.1	GO:0005758	-	sordNOG14426;opiNOG44602;sorNOG08437	S	sp|C5DT65|CMC4_ZYGRC Cx9C motif-containing protein 4, mitochondrial OS=Zygosaccharomyces rouxii (strain ATCC 2623 / CBS 732 / NBRC 1130 / NCYC 568 / NRRL Y-229) GN=CMC4 PE=3 SV=1	mature-T-cell-proliferation protein	18168648	-	GO:0005758//mitochondrial intermembrane space;	-	-
CCM_08018	87.7735	385.375	2.13441	2.54451e-05	0.00127464	NW_006271974.1	GO:0031177;GO:0016740;GO:0016491;GO:0055114	-	opiNOG01973	I	sp|W7MLD7|FUS1_GIBM7 Fusarin C synthetase OS=Gibberella moniliformis (strain M3125 / FGSC 7600) GN=FUS1 PE=1 SV=1	polyketide synthase, putative	18170027	GO:0055114//obsolete oxidation-reduction process;	-	GO:0031177//phosphopantetheine binding;GO:0016740//transferase activity;GO:0016491//oxidoreductase activity;	-
CCM_03401	786.846	2474.01	1.6527	3.12796e-05	0.0015118	NW_006271970.1	GO:0055114;GO:0004411;GO:0006559;GO:0006570	K00451	opiNOG02447;sordNOG07801	E	sp|Q9Y041|HGD_CAEEL Homogentisate 1,2-dioxygenase OS=Caenorhabditis elegans GN=hgo-1 PE=2 SV=2	homogentisate 1,2-dioxygenase, putative	18165427	GO:0055114//obsolete oxidation-reduction process;GO:0006559//L-phenylalanine catabolic process;GO:0006570//tyrosine metabolic process;	-	GO:0004411//homogentisate 1,2-dioxygenase activity;	ko00643(Styrene degradation);ko00350(Tyrosine metabolism)
CCM_00199	1188	2805.01	1.23946	3.21287e-05	0.00153988	NW_006271969.1	GO:0004252;GO:0006508	K01279	opiNOG09203;sordNOG15475;opiNOG21516	O	sp|Q70DX9|SED1_ASPFU Tripeptidyl-peptidase sed1 OS=Neosartorya fumigata (strain ATCC MYA-4609 / Af293 / CBS 101355 / FGSC A1100) GN=sed1 PE=1 SV=1	alkaline serine protease AorO	18162234	GO:0006508//proteolysis;	-	GO:0004252//serine-type endopeptidase activity;	ko04142(Lysosome)
CCM_02741	633.186	2135.1	1.7536	3.22949e-05	0.00153988	NW_006271970.1	-	-	hypNOG06251;opiNOG22413	S	-	hypothetical protein	18164768	-	-	-	-
CCM_01809	1388.04	4058.89	1.54803	3.2341e-05	0.00153988	NW_006271969.1	GO:0000981;GO:0005634;GO:0008270;GO:0003677;GO:0006357	-	sorNOG00581;opiNOG17151;pleNOG00002;sordNOG04713	S	-	Fungal transcriptional regulatory protein	18163839	GO:0006357//regulation of transcription by RNA polymerase II;	GO:0005634//nucleus;	GO:0000981//DNA-binding transcription factor activity, RNA polymerase II-specific;GO:0008270//zinc ion binding;GO:0003677//DNA binding;	-
CCM_09350	92.0501	252.83	1.45768	3.28527e-05	0.00155654	NW_006271977.1	GO:0016787;GO:0051539;GO:0006284	K03575	sordNOG11758	L	sp|Q9UIF7|MUTYH_HUMAN Adenine DNA glycosylase OS=Homo sapiens GN=MUTYH PE=1 SV=1	A/G-specific adenine glycosylase	18171353	GO:0006284//base-excision repair;	-	GO:0016787//hydrolase activity;GO:0051539//4 iron, 4 sulfur cluster binding;	ko03410(Base excision repair)
CCM_03550	564.297	1307.04	1.21178	3.4637e-05	0.00162507	NW_006271970.1	-	K09958	sordNOG09091;opiNOG30811	S	-	hypothetical protein	18165576	-	-	-	-
CCM_08305	443.475	1031.7	1.2181	4.06765e-05	0.0018809	NW_006271975.1	GO:0016788	K01114	sordNOG15265	I	sp|Q9RGS8|PHLN_BURPS Non-hemolytic phospholipase C OS=Burkholderia pseudomallei (strain K96243) GN=plcN PE=1 SV=2	non-hemolytic phospholipase C precursor, putative	18170313	-	-	GO:0016788//hydrolase activity, acting on ester bonds;	ko04919(Thyroid hormone signaling pathway);ko02024(Quorum sensing);ko00565(Ether lipid metabolism);ko00564(Glycerophospholipid metabolism);ko00562(Inositol phosphate metabolism)
CCM_01825	15.115	68.4734	2.17956	4.61335e-05	0.00209298	NW_006271969.1	GO:0004252;GO:0006508	K01279	opiNOG19608;necNOG14241;hypNOG10517	OBSK	sp|Q70GH4|SED3_ASPFU Tripeptidyl-peptidase sed3 OS=Neosartorya fumigata (strain ATCC MYA-4609 / Af293 / CBS 101355 / FGSC A1100) GN=sed3 PE=1 SV=1	tripeptidyl peptidase SED3	18163855	GO:0006508//proteolysis;	-	GO:0004252//serine-type endopeptidase activity;	ko04142(Lysosome)
CCM_09265	274.852	653.488	1.2495	5.57879e-05	0.00246132	NW_006271976.1	GO:0055085;GO:0042626;GO:0005524;GO:0016021	-	sorNOG07348;opiNOG11164;COG1132	VQ	sp|Q8J2Q1|FUM19_GIBM7 ABC transporter FUM19 OS=Gibberella moniliformis (strain M3125 / FGSC 7600) GN=FUM19 PE=2 SV=1	ABC multidrug transporter, putative	18171268	GO:0055085//transmembrane transport;	GO:0016021//integral component of membrane;	GO:0042626//ATPase-coupled transmembrane transporter activity;GO:0005524//ATP binding;	-
CCM_04115	188.916	461.016	1.28707	5.68168e-05	0.00248393	NW_006271971.1	GO:0016491;GO:0010181;GO:0055114	K00354	opiNOG04856	C	sp|A8C7R3|EASA_CLAFS Probable inactive dehydrogenase easA OS=Claviceps fusiformis GN=easA PE=3 SV=1	NADH:flavin oxidoreductase/NADH oxidase family protein	18166138	GO:0055114//obsolete oxidation-reduction process;	-	GO:0016491//oxidoreductase activity;GO:0010181//FMN binding;	-
CCM_09279	645.342	1474.14	1.19174	5.88259e-05	0.00254859	NW_006271976.1	-	K09705	sordNOG13133;opiNOG34176	SR	-	cupin superfamily protein	18171282	-	-	-	-
CCM_04562	2281.76	5605.85	1.29679	6.18669e-05	0.0026213	NW_006271971.1	GO:0050821;GO:0051604;GO:0042026;GO:0051082;GO:0003688;GO:0005758;GO:0045041;GO:0005524;GO:0016887;GO:0003697;GO:0031966;GO:0006458;GO:0042645;GO:0051131;GO:0051087	K04077	opiNOG03353;sordNOG07205	O	sp|Q5B041|HSP60_EMENI Heat shock protein 60 OS=Emericella nidulans (strain FGSC A4 / ATCC 38163 / CBS 112.46 / NRRL 194 / M139) GN=hsp60 PE=1 SV=1	heat shock protein 60 (Antigen HIS-62)	18166585	GO:0050821//protein stabilization;GO:0051604//protein maturation;GO:0042026//protein refolding;GO:0045041//protein import into mitochondrial intermembrane space;GO:0006458//'de novo' protein folding;GO:0051131//chaperone-mediated protein complex assembly;	GO:0005758//mitochondrial intermembrane space;GO:0031966//mitochondrial membrane;GO:0042645//mitochondrial nucleoid;	GO:0051082//unfolded protein binding;GO:0003688//DNA replication origin binding;GO:0005524//ATP binding;GO:0016887//ATP hydrolysis activity;GO:0003697//single-stranded DNA binding;GO:0051087//chaperone binding;	ko05417(Lipid and atherosclerosis);ko05152(Tuberculosis);ko05134(Legionellosis);ko04940(Type I diabetes mellitus);ko04212(Longevity regulating pathway - worm);ko03018(RNA degradation)
CCM_08824	59.8124	211.09	1.81934	6.47768e-05	0.00272063	NW_006271975.1	GO:0016021	-	sordNOG07846;NOG139032;opiNOG02463	TS	-	hypothetical protein	18170829	-	GO:0016021//integral component of membrane;	-	-
CCM_08145	7.75939	46.0088	2.5679	6.89822e-05	0.00287217	NW_006271974.1	GO:0055114;GO:0051213	-	opiNOG39354;sordNOG14377	RS	-	Glyoxalase/bleomycin resistance protein/dioxygenase	18170154	GO:0055114//obsolete oxidation-reduction process;	-	GO:0051213//dioxygenase activity;	-
CCM_04037	199.582	553.888	1.47261	7.20668e-05	0.00297484	NW_006271971.1	-	-	-	-	-	hypothetical protein	18166060	-	-	-	-
CCM_03004	1024.78	2285.12	1.15695	7.26519e-05	0.00298618	NW_006271970.1	GO:0005829;GO:0005634;GO:0005743;GO:0004325;GO:0006783	K01772	sordNOG08785	H	sp|P16622|HEMH_YEAST Ferrochelatase, mitochondrial OS=Saccharomyces cerevisiae (strain ATCC 204508 / S288c) GN=HEM15 PE=1 SV=1	ferrochelatase precursor	18165031	GO:0006783//heme biosynthetic process;	GO:0005829//cytosol;GO:0005634//nucleus;GO:0005743//mitochondrial inner membrane;	GO:0004325//ferrochelatase activity;	ko00860(Porphyrin metabolism)
CCM_09392	106.815	277.267	1.37616	8.32557e-05	0.00328062	NW_006271977.1	GO:0008168;GO:0032259	-	NOG77321;opiNOG22420;opiNOG79492;NOG00993	ISR	sp|Q9KJ20|GSDMT_ACTHA Glycine/sarcosine/dimethylglycine N-methyltransferase OS=Actinopolyspora halophila PE=1 SV=1	methyl transferase-like protein	18171395	GO:0032259//methylation;	-	GO:0008168//methyltransferase activity;	-
CCM_07588	951.849	2076.94	1.12565	8.35675e-05	0.00328062	NW_006271974.1	GO:0022891;GO:0055085;GO:0016021	-	opiNOG19059	R	sp|P53048|MAL11_YEAST General alpha-glucoside permease OS=Saccharomyces cerevisiae (strain ATCC 204508 / S288c) GN=MAL11 PE=1 SV=1	maltose permease	18169599	GO:0055085//transmembrane transport;	GO:0016021//integral component of membrane;	-	-
CCM_09291	93.9921	244.937	1.3818	8.80025e-05	0.00344068	NW_006271976.1	-	-	sordNOG09359;pleNOG07708;opiNOG24207	SR	-	hypothetical protein	18171294	-	-	-	-
CCM_08396	60.2787	172.608	1.51778	9.33163e-05	0.00363367	NW_006271975.1	-	-	-	-	-	hypothetical protein	18170404	-	-	-	-
CCM_05663	4867.81	10570	1.11864	9.55684e-05	0.00369147	NW_006271972.1	GO:0016021;GO:0055085	-	opiNOG12342;KOG2504	G	sp|Q5ATG7|APDF_EMENI Aspyridones efflux protein apdF OS=Emericella nidulans (strain FGSC A4 / ATCC 38163 / CBS 112.46 / NRRL 194 / M139) GN=apdF PE=2 SV=1	monocarboxylate permease, putative	18167681	GO:0055085//transmembrane transport;	GO:0016021//integral component of membrane;	-	-
CCM_06054	389.172	1101.75	1.50132	9.81149e-05	0.00377468	NW_006271972.1	-	-	opiNOG15098;sordNOG08989;opiNOG22398	S	sp|Q9UUA7|YHAH_SCHPO UPF0590 protein C409.17c OS=Schizosaccharomyces pombe (strain 972 / ATCC 24843) GN=SPBC409.17c PE=3 SV=1	hypothetical protein	18168069	-	-	-	-
CCM_08274	73.6586	199.896	1.44032	0.000105782	0.0040214	NW_006271975.1	GO:0055114;GO:0016491;GO:0016021;GO:0009073;GO:0003849;GO:0071949	K00480	opiNOG50043;opiNOG53451	IR	sp|J4VWM7|OPS4_BEAB2 FAD-dependent monooxygenase OpS4 OS=Beauveria bassiana (strain ARSEF 2860) GN=OpS4 PE=1 SV=1	salicylate hydroxylase, putative	18170282	GO:0055114//obsolete oxidation-reduction process;GO:0009073//aromatic amino acid family biosynthetic process;	GO:0016021//integral component of membrane;	GO:0016491//oxidoreductase activity;GO:0003849//3-deoxy-7-phosphoheptulonate synthase activity;GO:0071949//FAD binding;	ko00626(Naphthalene degradation);ko00624(Polycyclic aromatic hydrocarbon degradation);ko00621(Dioxin degradation)
CCM_09161	338.475	779.521	1.20354	0.000106533	0.004034	NW_006271976.1	GO:0071035;GO:0000467;GO:0071051;GO:0071038;GO:0034475;GO:0003723;GO:0000177;GO:0000176;GO:0034427;GO:0071049	K03679	sordNOG10530;opiNOG04896	J	sp|Q09704|RRP4_SCHPO Exosome complex component rrp4 OS=Schizosaccharomyces pombe (strain 972 / ATCC 24843) GN=rrp4 PE=3 SV=1	exosome component 2	18171164	GO:0071035//nuclear polyadenylation-dependent rRNA catabolic process;GO:0000467//exonucleolytic trimming to generate mature 3'-end of 5.8S rRNA from tricistronic rRNA transcript (SSU-rRNA, 5.8S rRNA, LSU-rRNA);GO:0071051//polyadenylation-dependent snoRNA 3'-end processing;GO:0071038//nuclear polyadenylation-dependent tRNA catabolic process;GO:0034475//U4 snRNA 3'-end processing;GO:0034427//nuclea…	GO:0000177//cytoplasmic exosome (RNase complex);GO:0000176//nuclear exosome (RNase complex);	GO:0003723//RNA binding;	ko03018(RNA degradation)
CCM_02890	140.559	339.914	1.274	0.000122276	0.00457607	NW_006271970.1	GO:0055085;GO:0016021;GO:0008270;GO:0006351;GO:0030170;GO:0005634;GO:0008483;GO:0003677	-	opiNOG28587;opiNOG04000	SE	sp|O94562|YGD3_SCHPO Uncharacterized aminotransferase C1771.03c OS=Schizosaccharomyces pombe (strain 972 / ATCC 24843) GN=SPBC1773.03c PE=3 SV=1	aminotransferase, putative	18164917	GO:0055085//transmembrane transport;GO:0006351//transcription, DNA-templated;	GO:0016021//integral component of membrane;GO:0005634//nucleus;	GO:0008270//zinc ion binding;GO:0030170//pyridoxal phosphate binding;GO:0008483//transaminase activity;GO:0003677//DNA binding;	-
CCM_05907	857.46	1845.66	1.10599	0.000126374	0.00471111	NW_006271972.1	GO:0005739;GO:0016021	K05770	opiNOG29479;sordNOG05556	T	sp|O94327|TSPO_SCHPO Translocator protein homolog OS=Schizosaccharomyces pombe (strain 972 / ATCC 24843) GN=SPBC725.10 PE=3 SV=2	translocator protein	18167925	-	GO:0005739//mitochondrion;GO:0016021//integral component of membrane;	-	ko05166(Human T-cell leukemia virus 1 infection);ko04979(Cholesterol metabolism);ko04214(Apoptosis - fly);ko04080(Neuroactive ligand-receptor interaction)
CCM_08019	1.00438	81.1506	6.33623	0.000127023	0.00471543	NW_006271974.1	-	-	opiNOG21897;opiNOG31821;opiNOG56372	RS	sp|Q1ERH9|CITA_MONPU Esterase mpl1 OS=Monascus purpureus GN=mpl1 PE=1 SV=1	citrinin biosynthesis oxydoreductase CtnB	18170028	-	-	-	-
CCM_00654	149.604	365.515	1.28878	0.000127471	0.00471543	NW_006271969.1	GO:0016021	-	opiNOG27827;opiNOG25834;opiNOG53814	R	sp|B8NM75|USTT_ASPFN Efflux pump ustT OS=Aspergillus flavus (strain ATCC 200026 / FGSC A1120 / NRRL 3357 / JCM 12722 / SRRC 167) GN=ustT PE=3 SV=1	Major facilitator superfamily transporter	18162688	-	GO:0016021//integral component of membrane;	-	-
CCM_00675	703.529	1538.85	1.12917	0.000128724	0.00474355	NW_006271969.1	GO:0016021;GO:0055085	-	KOG2615;opiNOG04434	R	sp|P25351|YCR3_YEAST Uncharacterized membrane protein YCR023C OS=Saccharomyces cerevisiae (strain ATCC 204508 / S288c) GN=YCR023C PE=1 SV=2	MFS transporter	18162709	GO:0055085//transmembrane transport;	GO:0016021//integral component of membrane;	-	-
CCM_02733	1.27071	30.4401	4.58227	0.000131881	0.00484135	NW_006271970.1	-	-	-	-	-	hypothetical protein	18164760	-	-	-	-
CCM_07056	282.205	706.102	1.32314	0.000132433	0.00484312	NW_006271973.1	-	-	sordNOG08133;opiNOG38589	S	-	hypothetical protein	18169067	-	-	-	-
CCM_01490	251.137	796.902	1.66593	0.000139446	0.00505836	NW_006271969.1	GO:0003830;GO:0016021;GO:0006487	K00737	sordNOG04859;sordNOG07996	G	sp|Q09327|MGAT3_HUMAN Beta-1,4-mannosyl-glycoprotein 4-beta-N-acetylglucosaminyltransferase OS=Homo sapiens GN=MGAT3 PE=2 SV=3	glycosyl transferase family 17 protein	18163521	GO:0006487//protein N-linked glycosylation;	GO:0016021//integral component of membrane;	GO:0003830//beta-1,4-mannosylglycoprotein 4-beta-N-acetylglucosaminyltransferase activity;	ko00510(N-Glycan biosynthesis)
CCM_02535	57.9314	596.236	3.36347	0.000144829	0.00517832	NW_006271970.1	GO:0008168;GO:0032259	-	eurotNOG10044;opiNOG53136	R	sp|Q0CCX8|GEDG_ASPTN Methyltransferase gedG OS=Aspergillus terreus (strain NIH 2624 / FGSC A1156) GN=gedG PE=3 SV=1	Methyltransferase type 11	18164562	GO:0032259//methylation;	-	GO:0008168//methyltransferase activity;	-
CCM_02541	15.1301	63.0004	2.05794	0.000157619	0.00557346	NW_006271970.1	-	-	-	-	-	hypothetical protein	18164568	-	-	-	-
CCM_06442	342.125	1632.76	2.25471	0.000167621	0.00589177	NW_006271973.1	GO:0008289	-	sordNOG08362;hypNOG04424;opiNOG02054	S	sp|Q10327|YD72_SCHPO Uncharacterized protein C32A11.02c OS=Schizosaccharomyces pombe (strain 972 / ATCC 24843) GN=SPAC32A11.02c PE=4 SV=1	Bactericidal permeability-increasing protein, alpha/beta domain	18168456	-	-	GO:0008289//lipid binding;	-
CCM_08874	6.66084	39.0696	2.55227	0.000170897	0.0059409	NW_006271975.1	-	-	-	-	-	hypothetical protein	18170879	-	-	-	-
CCM_07352	344.727	1172.8	1.76644	0.000177459	0.00611755	NW_006271974.1	GO:0016021;GO:0055085	-	sordNOG04251	R	sp|G3XMC9|AZAK_ASPNA Efflux pump azaK OS=Aspergillus niger (strain ATCC 1015 / CBS 113.46 / FGSC A1144 / LSHB Ac4 / NCTC 3858a / NRRL 328 / USDA 3528.7) GN=azaK PE=2 SV=1	Major facilitator superfamily transporter	18169363	GO:0055085//transmembrane transport;	GO:0016021//integral component of membrane;	-	-
CCM_02140	771.188	1629.13	1.07895	0.000191639	0.00649008	NW_006271970.1	GO:0016021;GO:0055085;GO:0008643;GO:0022891	-	NOG00192;opiNOG09892;opiNOG09464	RG	sp|P49374|HGT1_KLULA High-affinity glucose transporter OS=Kluyveromyces lactis (strain ATCC 8585 / CBS 2359 / DSM 70799 / NBRC 1267 / NRRL Y-1140 / WM37) GN=HGT1 PE=3 SV=1	sugar transporter, putative	18164168	GO:0055085//transmembrane transport;GO:0008643//carbohydrate transport;	GO:0016021//integral component of membrane;	-	-
CCM_08143	2198.66	4568.92	1.05523	0.000193202	0.00652005	NW_006271974.1	GO:0016567;GO:0005847;GO:0008270;GO:0036002;GO:0006379;GO:0006378;GO:0005829	K15541	sordNOG11981	O	sp|O94264|YORF_SCHPO Uncharacterized RING finger protein P8B7.15c OS=Schizosaccharomyces pombe (strain 972 / ATCC 24843) GN=SPBP8B7.15c PE=4 SV=1	retinoblastoma-binding protein	18170152	GO:0016567//protein ubiquitination;GO:0006379//mRNA cleavage;GO:0006378//mRNA polyadenylation;	GO:0005847//mRNA cleavage and polyadenylation specificity factor complex;GO:0005829//cytosol;	GO:0008270//zinc ion binding;GO:0036002//pre-mRNA binding;	ko03015(mRNA surveillance pathway)
CCM_00043	9.63071	79.3709	3.0429	0.00020761	0.00690932	NW_006271969.1	GO:0016021;GO:0055085	-	sordNOG10259;opiNOG17171;NOG131545	UR	sp|A1CFL0|PATC_ASPCL Efflux pump patC OS=Aspergillus clavatus (strain ATCC 1007 / CBS 513.65 / DSM 816 / NCTC 3887 / NRRL 1) GN=patC PE=1 SV=1	Major facilitator superfamily transporter	18162078	GO:0055085//transmembrane transport;	GO:0016021//integral component of membrane;	-	-
CCM_05727	246.228	557.938	1.18011	0.000218404	0.00724349	NW_006271972.1	GO:0016021	-	necNOG08817;opiNOG52720;hypNOG01315	E	sp|P38680|MTR_NEUCR N amino acid transport system protein OS=Neurospora crassa (strain ATCC 24698 / 74-OR23-1A / CBS 708.71 / DSM 1257 / FGSC 987) GN=mtr PE=3 SV=2	amino acid transporter, putative	18167745	-	GO:0016021//integral component of membrane;	-	-
CCM_01817	513.579	1102.74	1.10244	0.000245896	0.00798188	NW_006271969.1	-	-	necNOG14012	S	-	hypothetical protein	18163847	-	-	-	-
CCM_03124	1674.4	3479.93	1.05541	0.000246477	0.00798188	NW_006271970.1	GO:0005634;GO:0000981;GO:0008270;GO:0003677;GO:0006357	-	opiNOG20525;sordNOG06505	S	sp|A0A0D2YFZ7|FUB12_FUSO4 Fusaric acid cluster transcription factor FUB12 OS=Fusarium oxysporum f. sp. lycopersici (strain 4287 / CBS 123668 / FGSC 9935 / NRRL 34936) GN=FUB12 PE=1 SV=1	Fungal transcriptional regulatory protein	18165151	GO:0006357//regulation of transcription by RNA polymerase II;	GO:0005634//nucleus;	GO:0000981//DNA-binding transcription factor activity, RNA polymerase II-specific;GO:0008270//zinc ion binding;GO:0003677//DNA binding;	-
CCM_01800	34.2525	119.403	1.80156	0.000249634	0.00805697	NW_006271969.1	GO:0015171;GO:0016021;GO:0003333	-	COG0833;pleNOG00932;opiNOG13147	E	sp|P34054|INDA1_HYPAT Amino-acid permease inda1 OS=Hypocrea atroviridis GN=inda1 PE=2 SV=1	amino acid transporter, putative	18163830	GO:0003333//amino acid transmembrane transport;	GO:0016021//integral component of membrane;	GO:0015171//amino acid transmembrane transporter activity;	-
CCM_01862	1444.76	3812.02	1.39973	0.0002529	0.00810797	NW_006271969.1	-	-	opiNOG47914;opiNOG66321;sordNOG14802	R	sp|Q4WLB9|CFMA_ASPFU GPI-anchored CFEM domain protein A OS=Neosartorya fumigata (strain ATCC MYA-4609 / Af293 / CBS 101355 / FGSC A1100) GN=cfmA PE=1 SV=1	CFEM domain protein	18163891	-	-	-	-
CCM_07086	97.2311	502.775	2.37042	0.000272301	0.00863996	NW_006271973.1	GO:0015098;GO:0016021;GO:0015689	K24175	opiNOG07479;sordNOG07405	G	sp|Q6N075|MFSD5_HUMAN Molybdate-anion transporter OS=Homo sapiens GN=MFSD5 PE=1 SV=2	major facilitator superfamily domain containing protein 5	18169097	GO:0015689//molybdate ion transport;	GO:0016021//integral component of membrane;	GO:0015098//molybdate ion transmembrane transporter activity;	-
CCM_00377	52.2418	163.905	1.64958	0.000285515	0.0089652	NW_006271969.1	GO:0055085;GO:0016021	-	COG0477;magNOG04098;sordNOG06197;opiNOG18573	RG	sp|D2E9W8|DEP3_ALTBR Efflux pump DEP3 OS=Alternaria brassicicola GN=DEP3 PE=2 SV=1	Major facilitator superfamily transporter	18162412	GO:0055085//transmembrane transport;	GO:0016021//integral component of membrane;	-	-
CCM_06633	1734.26	3561.5	1.03817	0.000297994	0.00918624	NW_006271973.1	GO:0042802;GO:0000794;GO:0005940;GO:0016925;GO:0031386	-	sordNOG13717;opiNOG38078;sordNOG13659	O	sp|Q12306|SMT3_YEAST Ubiquitin-like protein SMT3 OS=Saccharomyces cerevisiae (strain ATCC 204508 / S288c) GN=SMT3 PE=1 SV=1	ubiquitin-like modifier SUMO, putative	18168647	GO:0016925//protein sumoylation;	GO:0000794//condensed nuclear chromosome;GO:0005940//septin ring;	GO:0042802//identical protein binding;GO:0031386//protein tag;	-
CCM_03032	155.216	350.35	1.17452	0.0003108	0.00951999	NW_006271970.1	GO:0004553;GO:0005975	-	opiNOG11771	R	sp|D4AJR9|EGLX_ARTBC Endo-1,3(4)-beta-glucanase ARB_04519 OS=Arthroderma benhamiae (strain ATCC MYA-4681 / CBS 112371) GN=ARB_04519 PE=3 SV=1	GPI anchored endo-1,3(4)-beta-glucanase	18165059	GO:0005975//carbohydrate metabolic process;	-	GO:0004553//hydrolase activity, hydrolyzing O-glycosyl compounds;	-
CCM_08746	77.0969	189.124	1.29459	0.000348411	0.0105378	NW_006271975.1	GO:0016787	-	onyNOG06879;opiNOG20398	R	sp|O15442|MPPD1_HUMAN Metallophosphoesterase domain-containing protein 1 OS=Homo sapiens GN=MPPED1 PE=2 SV=3	Metallophosphoesterase	18170751	-	-	GO:0016787//hydrolase activity;	-
CCM_00771	24.0232	104.065	2.11499	0.000351022	0.0105835	NW_006271969.1	GO:0016021;GO:0055085	-	euroNOG06742;pleNOG08082;opiNOG07079	R	sp|O94343|YHMA_SCHPO Uncharacterized MFS-type transporter C1271.10c OS=Schizosaccharomyces pombe (strain 972 / ATCC 24843) GN=SPBC1271.10c PE=1 SV=1	Major facilitator superfamily transporter	18162805	GO:0055085//transmembrane transport;	GO:0016021//integral component of membrane;	-	-
CCM_00826	19.9165	858.908	5.43047	0.000360238	0.0106968	NW_006271969.1	GO:0006508;GO:0004190	-	KOG1339;sordNOG05838	O	sp|P11838|CARP_CRYPA Endothiapepsin OS=Cryphonectria parasitica GN=EAPA PE=1 SV=2	endothiapepsin precursor	18162860	GO:0006508//proteolysis;	-	GO:0004190//aspartic-type endopeptidase activity;	-
CCM_01493	144.437	330.811	1.19557	0.00036034	0.0106968	NW_006271969.1	GO:0016021	K14347	sordNOG09929;opiNOG07485	SP	sp|Q05131|YMS4_YEAST Uncharacterized membrane protein YMR034C OS=Saccharomyces cerevisiae (strain ATCC 204508 / S288c) GN=YMR034C PE=1 SV=1	sodium bile acid symporter	18163524	-	GO:0016021//integral component of membrane;	-	-
CCM_02314	91.1309	222.235	1.28608	0.000366477	0.0108122	NW_006271970.1	-	-	-	-	-	hypothetical protein	18164341	-	-	-	-
CCM_04974	113.496	286.323	1.335	0.000381275	0.011175	NW_006271971.1	GO:0055114;GO:0016491	K00306	opiNOG13889;opiNOG31274	R	sp|O43029|FAP1_SCHPO L-pipecolate oxidase OS=Schizosaccharomyces pombe (strain 972 / ATCC 24843) GN=fap1 PE=1 SV=1	sarcosine oxidase	18166994	GO:0055114//obsolete oxidation-reduction process;	-	GO:0016491//oxidoreductase activity;	ko04146(Peroxisome);ko00310(Lysine degradation);ko00260(Glycine, serine and threonine metabolism)
CCM_07906	1277.08	2607.15	1.02963	0.000405376	0.0117116	NW_006271974.1	GO:0009446;GO:0004586;GO:0015940	K01581	sordNOG06389	E	sp|P27121|DCOR_NEUCR Ornithine decarboxylase OS=Neurospora crassa (strain ATCC 24698 / 74-OR23-1A / CBS 708.71 / DSM 1257 / FGSC 987) GN=spe-1 PE=2 SV=1	ornithine decarboxylase	18169916	GO:0009446//putrescine biosynthetic process;GO:0015940//pantothenate biosynthetic process;	-	GO:0004586//ornithine decarboxylase activity;	ko00480(Glutathione metabolism);ko00330(Arginine and proline metabolism)
CCM_07905	82.7531	204.663	1.30636	0.000408214	0.0117551	NW_006271974.1	-	-	-	-	-	hypothetical protein	18169915	-	-	-	-
CCM_03803	3.36478	26.6306	2.9845	0.000409948	0.0117698	NW_006271971.1	-	-	-	-	-	hypothetical protein	18165826	-	-	-	-
CCM_04354	956.72	3710.53	1.95546	0.000425637	0.0121118	NW_006271971.1	GO:0016705;GO:0055114;GO:0004497	-	opiNOG10215;sordNOG11624;sorNOG01743	S	sp|E9JFX9|DMOA_HYPSL Dimethyl-sulfide monooxygenase OS=Hyphomicrobium sulfonivorans GN=dmoA PE=1 SV=1	dibenzothiophene desulfurization enzyme A	18166377	GO:0055114//obsolete oxidation-reduction process;	-	GO:0016705//oxidoreductase activity, acting on paired donors, with incorporation or reduction of molecular oxygen;GO:0004497//monooxygenase activity;	-
CCM_07332	5204.12	10410.3	1.00029	0.000440424	0.0124956	NW_006271974.1	GO:0016021	-	opiNOG22603;sordNOG04605	S	sp|Q54U75|CRLA_DICDI Cyclic AMP receptor-like protein A OS=Dictyostelium discoideum GN=crlA PE=2 SV=1	hypothetical protein	18169343	-	GO:0016021//integral component of membrane;	-	-
CCM_02428	38.1496	107.971	1.50091	0.000474806	0.013353	NW_006271970.1	-	-	-	-	-	hypothetical protein	18164455	-	-	-	-
CCM_02644	1032.11	2341.48	1.18182	0.000474809	0.013353	NW_006271970.1	-	-	sordNOG11483	S	-	leucine rich repeat protein	18164671	-	-	-	-
CCM_07859	452.67	947.061	1.065	0.00048074	0.0134022	NW_006271974.1	GO:0050085;GO:0055114	K17742	opiNOG12282;COG1028	IQ	sp|Q8NK50|MTDH_HYPJE NADP-dependent mannitol dehydrogenase OS=Hypocrea jecorina GN=lxr1 PE=1 SV=1	L-xylulose reductase	18169869	GO:0055114//obsolete oxidation-reduction process;	-	GO:0050085//mannitol 2-dehydrogenase (NADP+) activity;	ko00051(Fructose and mannose metabolism)
CCM_01379	347.16	892.948	1.36298	0.00048562	0.0134782	NW_006271969.1	GO:0016021;GO:0034067;GO:0008270;GO:0044695;GO:0016567;GO:0016874;GO:0043162;GO:0005794;GO:0016485;GO:0061630;GO:0005783	K23788	sordNOG09447	O	sp|P36096|TUL1_YEAST Transmembrane E3 ubiquitin-protein ligase 1 OS=Saccharomyces cerevisiae (strain ATCC 204508 / S288c) GN=TUL1 PE=1 SV=1	RING finger ubiquitin ligase, putative	18163410	GO:0034067//protein localization to Golgi apparatus;GO:0016567//protein ubiquitination;GO:0043162//ubiquitin-dependent protein catabolic process via the multivesicular body sorting pathway;GO:0016485//protein processing;	GO:0016021//integral component of membrane;GO:0044695//Dsc E3 ubiquitin ligase complex;GO:0005794//Golgi apparatus;GO:0005783//endoplasmic reticulum;	GO:0008270//zinc ion binding;GO:0016874//ligase activity;GO:0061630//ubiquitin protein ligase activity;	-
CCM_02664	753.963	1547.21	1.0371	0.000486271	0.0134782	NW_006271970.1	GO:0046872;GO:0004114;GO:0007165	-	opiNOG02518;sordNOG07048	T	sp|P06776|PDE2_YEAST 3&apos;,5&apos;-cyclic-nucleotide phosphodiesterase 2 OS=Saccharomyces cerevisiae (strain ATCC 204508 / S288c) GN=PDE2 PE=1 SV=2	high affinity cAMP phosphodiesterase, putative	18164691	GO:0007165//signal transduction;	-	GO:0046872//metal ion binding;GO:0004114//3',5'-cyclic-nucleotide phosphodiesterase activity;	-
CCM_09019	183.363	403.223	1.13687	0.000496304	0.0137168	NW_006271975.1	-	-	opiNOG43263;opiNOG44308;sordNOG14422	R	sp|Q9VFP2|RDX_DROME Protein roadkill OS=Drosophila melanogaster GN=rdx PE=1 SV=2	BTB/POZ domain protein	18171023	-	-	-	-
CCM_02588	38.0558	113.953	1.58225	0.000500287	0.0137527	NW_006271970.1	-	-	necNOG05211;hypNOG04353	S	-	hypothetical protein	18164615	-	-	-	-
CCM_09287	54325	114770	1.07906	0.0005021	0.0137527	NW_006271976.1	GO:0055114;GO:0008926;GO:0019594;GO:0050662	K00009	sordNOG10633	C	sp|Q7SA44|MTLD_NEUCR Mannitol-1-phosphate 5-dehydrogenase OS=Neurospora crassa (strain ATCC 24698 / 74-OR23-1A / CBS 708.71 / DSM 1257 / FGSC 987) GN=NCU07318 PE=3 SV=1	mannitol-1-phosphate 5-dehydrogenase	18171290	GO:0055114//obsolete oxidation-reduction process;GO:0019594//mannitol metabolic process;	-	GO:0008926//mannitol-1-phosphate 5-dehydrogenase activity;GO:0050662//obsolete coenzyme binding;	ko00051(Fructose and mannose metabolism)
CCM_08416	31.4556	93.9142	1.57803	0.000503323	0.0137527	NW_006271975.1	-	-	-	-	-	hypothetical protein	18170424	-	-	-	-
CCM_00116	10434.8	30492	1.54702	0.000528558	0.0143202	NW_006271969.1	GO:0043086;GO:0051879;GO:0003729;GO:0005634;GO:0005829;GO:0006457;GO:0042030;GO:0030544	K09553	sorNOG02559;opiNOG00314;sordNOG05038	O	sp|Q9USI5|STI1_SCHPO Heat shock protein sti1 homolog OS=Schizosaccharomyces pombe (strain 972 / ATCC 24843) GN=sti1 PE=3 SV=1	heat shock protein	18162151	GO:0043086//negative regulation of catalytic activity;GO:0006457//protein folding;	GO:0005634//nucleus;GO:0005829//cytosol;	GO:0051879//Hsp90 protein binding;GO:0003729//mRNA binding;GO:0042030//ATPase inhibitor activity;GO:0030544//Hsp70 protein binding;	ko05020(Prion disease)
CCM_06302	179.585	447.911	1.31854	0.000537536	0.0145192	NW_006271972.1	-	-	sordNOG14992;NOG26507;opiNOG14814	RS	-	C6 finger domain protein, putative	18168317	-	-	-	-
CCM_03469	230.131	572.268	1.31423	0.00054516	0.0146054	NW_006271970.1	-	-	-	-	-	Ubiquitin	18165495	-	-	-	-
CCM_01597	24772.5	59839.5	1.27236	0.000546817	0.0146091	NW_006271969.1	-	-	-	-	-	hypothetical protein	18163628	-	-	-	-
CCM_06930	19.7566	70.0835	1.82674	0.000550422	0.0146647	NW_006271973.1	-	-	NOG200556	S	-	protein-tyrosine phosphatase	18168941	-	-	-	-
CCM_07839	27953.9	99495.6	1.83158	0.000555718	0.0147242	NW_006271974.1	GO:0005524;GO:0006950;GO:0006457;GO:0051082	K04079	opiNOG01126;sordNOG09788	O	sp|O43109|HSP90_PODAS Heat shock protein 90 homolog OS=Podospora anserina GN=MOD-E PE=3 SV=1	heat shock protein 90	18169849	GO:0006950//response to stress;GO:0006457//protein folding;	-	GO:0005524//ATP binding;GO:0051082//unfolded protein binding;	ko05418(Fluid shear stress and atherosclerosis);ko05417(Lipid and atherosclerosis);ko05215(Prostate cancer);ko05207(Chemical carcinogenesis - receptor activation);ko05200(Pathways in cancer);ko05132(Salmonella infection);ko04915(Estrogen signaling pathway);ko04914(Progesterone-mediated oocyte maturation);ko04659(Th17 cell differentiation);ko04657(IL-17 signaling pathway);ko04626(Plant-pathogen in…
CCM_03585	34.991	188.33	2.4282	0.000594064	0.0154431	NW_006271970.1	-	-	hypNOG14200;sorNOG08558;sordNOG14926	S	-	hypothetical protein	18165611	-	-	-	-
CCM_04325	163.454	565.932	1.79174	0.000594087	0.0154431	NW_006271971.1	GO:0006855;GO:0016021;GO:0015238;GO:0015297	K03327	sordNOG06366	S	sp|Q9USK3|YJ2D_SCHPO Uncharacterized transporter C4B3.13 OS=Schizosaccharomyces pombe (strain 972 / ATCC 24843) GN=SPCC4B3.13 PE=3 SV=1	MATE efflux family protein subfamily, putative	18166348	GO:0006855//xenobiotic transmembrane transport;	GO:0016021//integral component of membrane;	GO:0015297//antiporter activity;	-
CCM_07254	54.3764	138.816	1.35212	0.000615242	0.015907	NW_006271973.1	GO:0000981;GO:0005634;GO:0008270;GO:0006357;GO:0003677	-	opiNOG05763;sordNOG06793	RS	-	C6 transcription factor	18169265	GO:0006357//regulation of transcription by RNA polymerase II;	GO:0005634//nucleus;	GO:0000981//DNA-binding transcription factor activity, RNA polymerase II-specific;GO:0008270//zinc ion binding;GO:0003677//DNA binding;	-
CCM_08067	264.855	553.216	1.06264	0.000652903	0.0166192	NW_006271974.1	GO:0016884	-	sorNOG08092;opiNOG12593	JS	sp|Q5V2G6|GATA_HALMA Glutamyl-tRNA(Gln) amidotransferase subunit A OS=Haloarcula marismortui (strain ATCC 43049 / DSM 3752 / JCM 8966 / VKM B-1809) GN=gatA PE=3 SV=1	amidase	18170076	-	-	GO:0016884//carbon-nitrogen ligase activity, with glutamine as amido-N-donor;	-
CCM_05039	54.8632	7649.1	7.12331	0.000653156	0.0166192	NW_006271972.1	GO:0016620;GO:0055114	-	sordNOG14962;hypNOG13793;opiNOG45017	S	-	Grg1 protein	18167059	GO:0055114//obsolete oxidation-reduction process;	-	GO:0016620//oxidoreductase activity, acting on the aldehyde or oxo group of donors, NAD or NADP as acceptor;	-
CCM_00327	1376.84	2831.63	1.04028	0.000683851	0.0173458	NW_006271969.1	GO:0010513;GO:0000329;GO:0033674;GO:0016021;GO:0070772	-	sordNOG09480	S	-	phospholipid metabolism enzyme regulator, putative	18162362	GO:0010513//positive regulation of phosphatidylinositol biosynthetic process;GO:0033674//positive regulation of kinase activity;	GO:0000329//fungal-type vacuole membrane;GO:0016021//integral component of membrane;GO:0070772//PAS complex;	-	-
CCM_08301	218.375	466.158	1.09401	0.000690265	0.0173844	NW_006271975.1	GO:0006108;GO:0004471;GO:0051287;GO:0046872;GO:0055114	K00027	COG0281;opiNOG04071	C	sp|P36013|MAOM_YEAST NAD-dependent malic enzyme, mitochondrial OS=Saccharomyces cerevisiae (strain ATCC 204508 / S288c) GN=MAE1 PE=1 SV=1	malate dehydrogenase, putative	18170309	GO:0006108//malate metabolic process;GO:0055114//obsolete oxidation-reduction process;	-	GO:0004471//malate dehydrogenase (decarboxylating) (NAD+) activity;GO:0051287//NAD binding;GO:0046872//metal ion binding;	ko02020(Two-component system);ko00620(Pyruvate metabolism)
CCM_03516	410.677	1036.47	1.33561	0.000706208	0.0176051	NW_006271970.1	GO:0016021	-	opiNOG35042	S	-	hypothetical protein	18165542	-	GO:0016021//integral component of membrane;	-	-
CCM_03281	48.0958	122.806	1.3524	0.000711977	0.0176051	NW_006271970.1	-	-	-	-	-	hypothetical protein	18165307	-	-	-	-
CCM_07109	514.063	1039.39	1.01572	0.000740298	0.0182102	NW_006271973.1	GO:0016787	-	opiNOG01185	R	sp|Q9SR79|PPA16_ARATH Probable inactive purple acid phosphatase 16 OS=Arabidopsis thaliana GN=PAP16 PE=2 SV=1	Metallophosphoesterase	18169120	-	-	GO:0016787//hydrolase activity;	-
CCM_06547	9.39835	63.641	2.75948	0.000790226	0.0191929	NW_006271973.1	-	-	sordNOG05103;opiNOG13361;sorNOG08561;pleNOG00881	QR	sp|P39577|DLTE_BACSU Uncharacterized oxidoreductase DltE OS=Bacillus subtilis (strain 168) GN=dltE PE=3 SV=2	short-chain dehydrogenases/reductase, putative	18168561	-	-	-	-
CCM_04848	18.899	61.9054	1.71175	0.000824431	0.0196963	NW_006271971.1	-	-	-	-	-	hypothetical protein	18166869	-	-	-	-
CCM_00890	14.394	52.402	1.86415	0.000825289	0.0196963	NW_006271969.1	-	-	-	-	-	hypothetical protein	18162924	-	-	-	-
CCM_09213	21.9777	134.054	2.6087	0.000835391	0.0197604	NW_006271976.1	GO:0008654;GO:0004609	K01613	sordNOG06687	I	sp|P0DPA6|PSID_PSICU L-tryptophan decarboxylase psiD OS=Psilocybe cubensis GN=psiD PE=1 SV=1	phosphatidylserine decarboxylase family protein	18171216	GO:0008654//phospholipid biosynthetic process;	-	GO:0004609//phosphatidylserine decarboxylase activity;	ko00564(Glycerophospholipid metabolism)
CCM_08037	21.9867	68.7958	1.64569	0.000836189	0.0197604	NW_006271974.1	-	-	sordNOG13300;hypNOG12388	R	-	C2H2 finger domain protein, putative	18170046	-	-	-	-
CCM_02125	1165.26	2616.79	1.16715	0.000850151	0.0199433	NW_006271970.1	-	-	pleNOG06000;sorNOG06180;opiNOG38186	R	-	hypothetical protein	18164153	-	-	-	-
CCM_03738	62.4954	208.529	1.73842	0.000860272	0.0201085	NW_006271971.1	GO:0090305;GO:0004519;GO:0003676	-	opiNOG20494	S	sp|Q9Y4A0|JERKL_HUMAN Jerky protein homolog-like OS=Homo sapiens GN=JRKL PE=2 SV=2	DDE superfamily endonuclease, CENP-B-like protein	18165761	GO:0090305//nucleic acid phosphodiester bond hydrolysis;	-	GO:0004519//endonuclease activity;GO:0003676//nucleic acid binding;	-
CCM_06647	108.961	247.07	1.1811	0.000861373	0.0201085	NW_006271973.1	-	-	necNOG11530;sordNOG15244;hypNOG13310	S	-	hypothetical protein	18168661	-	-	-	-
CCM_01960	345.034	701.073	1.02283	0.000866816	0.0201865	NW_006271970.1	-	K11153	KOG1208;opiNOG26431	Q	sp|D7UQ42|SOL3_ALTSO Short chain dehydrogenase sol3 OS=Alternaria solani GN=sol3 PE=3 SV=1	Short-chain dehydrogenase/reductase SDR	18163989	-	-	-	ko00830(Retinol metabolism)
CCM_02563	20.9733	68.757	1.71295	0.000909954	0.0209377	NW_006271970.1	-	-	-	-	-	hypothetical protein	18164590	-	-	-	-
CCM_07497	12.0166	48.3426	2.00827	0.000919204	0.0210498	NW_006271974.1	-	-	-	-	-	hypothetical protein	18169508	-	-	-	-
CCM_07587	302.891	617.397	1.0274	0.000930448	0.0212567	NW_006271974.1	GO:0005634;GO:0000981;GO:0008270;GO:0006357	-	opiNOG22438	S	-	C6 zinc finger domain protein	18169598	GO:0006357//regulation of transcription by RNA polymerase II;	GO:0005634//nucleus;	GO:0000981//DNA-binding transcription factor activity, RNA polymerase II-specific;GO:0008270//zinc ion binding;	-
CCM_05326	3637.51	8225.58	1.17717	0.000943823	0.0214834	NW_006271972.1	GO:0006457;GO:0051082;GO:0005524	K04043	opiNOG00748;sorNOG00178;sordNOG04035	O	sp|Q5B0C0|HSP7M_EMENI Heat shock 70 kDa protein OS=Emericella nidulans (strain FGSC A4 / ATCC 38163 / CBS 112.46 / NRRL 194 / M139) GN=AN6010 PE=1 SV=1	heat shock 70 kDa protein	18167344	GO:0006457//protein folding;	-	GO:0051082//unfolded protein binding;GO:0005524//ATP binding;	ko05152(Tuberculosis);ko04212(Longevity regulating pathway - worm);ko03018(RNA degradation)
CCM_05002	313.586	630.979	1.00873	0.00103053	0.0229436	NW_006271971.1	GO:0016020;GO:0043047;GO:1990879;GO:0016233	-	opiNOG00668;sordNOG12116;opiNOG20338;eurotNOG07878	R	sp|D4B0V1|E13B_ARTBC Probable glucan endo-1,3-beta-glucosidase ARB_02077 OS=Arthroderma benhamiae (strain ATCC MYA-4681 / CBS 112371) GN=ARB_02077 PE=1 SV=1	LysM domain protein	18167022	GO:0016233//telomere capping;	GO:0016020//membrane;GO:1990879//CST complex;	GO:0043047//single-stranded telomeric DNA binding;	-
CCM_03537	182.572	380.911	1.06099	0.0010424	0.0231543	NW_006271970.1	GO:0005576	-	sordNOG14070;opiNOG38583	R	sp|P52753|CRYP_CRYPA Cryparin OS=Cryphonectria parasitica GN=CRP PE=1 SV=1	Hydrophobin 2	18165563	-	GO:0005576//extracellular region;	-	-
CCM_06851	213.06	432.075	1.02002	0.00109249	0.0241243	NW_006271973.1	-	-	necNOG13234;sordNOG14353;hypNOG05735	RS	-	antigenic cell wall galactomannoprotein	18168862	-	-	-	-
CCM_08383	211.655	436.322	1.04368	0.00110492	0.0243184	NW_006271975.1	GO:0016021	-	-	-	-	hypothetical protein	18170391	-	GO:0016021//integral component of membrane;	-	-
CCM_09250	1938.4	8175.35	2.07642	0.00112056	0.0245503	NW_006271976.1	-	-	opiNOG10549;pleNOG08530	SR	sp|A0A097ZPE4|ANDK_EMEVA Cytochrome P450 monooxygenase andK OS=Emericella variicolor GN=andK PE=1 SV=1	Beta-lactamase-like protein	18171253	-	-	-	-
CCM_03445	3721.45	8089.28	1.12015	0.00114433	0.0249458	NW_006271970.1	GO:0055085;GO:0042626;GO:0005524;GO:0016021	K05665	COG1132;opiNOG11164	VQ	sp|Q8J2Q1|FUM19_GIBM7 ABC transporter FUM19 OS=Gibberella moniliformis (strain M3125 / FGSC 7600) GN=FUM19 PE=2 SV=1	multidrug resistance-associated protein, putative	18165471	GO:0055085//transmembrane transport;	GO:0016021//integral component of membrane;	GO:0042626//ATPase-coupled transmembrane transporter activity;GO:0005524//ATP binding;	ko05206(MicroRNAs in cancer);ko04977(Vitamin digestion and absorption);ko04071(Sphingolipid signaling pathway);ko02010(ABC transporters);ko01523(Antifolate resistance)
CCM_04781	36.1483	95.0414	1.39463	0.00120531	0.0259343	NW_006271971.1	-	-	euNOG25701;sordNOG12331;eurotNOG06655;opiNOG19181	Q	sp|B8M9K8|TROPE_TALSN Short-chain dehydrogenase/reductase tropE OS=Talaromyces stipitatus (strain ATCC 10500 / CBS 375.48 / QM 6759 / NRRL 1006) GN=tropE PE=3 SV=1	short-chain dehydrogenase, putative	18166802	-	-	-	-
CCM_00471	1709.79	4055.01	1.24588	0.00124227	0.0264926	NW_006271969.1	-	K09983	opiNOG45347;COG3812	S	-	hypothetical protein	18162506	-	-	-	-
CCM_00678	345.618	1353.68	1.96964	0.00125929	0.026737	NW_006271969.1	GO:0050660;GO:0003997;GO:0006635;GO:0005777	K00232	opiNOG02652	I	sp|Q8HYL8|ACOX1_PHACI Peroxisomal acyl-coenzyme A oxidase 1 OS=Phascolarctos cinereus GN=ACOX1 PE=1 SV=2	Acyl-CoA oxidase	18162712	GO:0006635//fatty acid beta-oxidation;	GO:0005777//peroxisome;	GO:0050660//flavin adenine dinucleotide binding;GO:0003997//acyl-CoA oxidase activity;	ko04936(Alcoholic liver disease);ko04146(Peroxisome);ko04024(cAMP signaling pathway);ko03320(PPAR signaling pathway);ko01040(Biosynthesis of unsaturated fatty acids);ko00640(Propanoate metabolism);ko00592(alpha-Linolenic acid metabolism);ko00410(beta-Alanine metabolism);ko00071(Fatty acid degradation)
CCM_03231	15.9125	94.7846	2.57449	0.00128001	0.0270341	NW_006271970.1	GO:0008152;GO:0016787	K12350	sordNOG09160;opiNOG14637	IG	sp|Q04519|ASM_MOUSE Sphingomyelin phosphodiesterase OS=Mus musculus GN=Smpd1 PE=1 SV=2	acid sphingomyelinase, putative	18165257	GO:0008152//metabolic process;	-	GO:0016787//hydrolase activity;	ko04217(Necroptosis);ko04142(Lysosome);ko04071(Sphingolipid signaling pathway);ko00600(Sphingolipid metabolism)
CCM_06772	176.975	645.688	1.86729	0.00129072	0.0270341	NW_006271973.1	-	-	hypNOG09902;sordNOG06478;opiNOG17533	S	-	hypothetical protein	18168785	-	-	-	-
CCM_01369	206.247	413.192	1.00244	0.00129775	0.0270341	NW_006271969.1	GO:0016301;GO:0016310	-	sordNOG08172;hypNOG00955	S	-	hypothetical protein	18163400	GO:0016310//phosphorylation;	-	GO:0016301//kinase activity;	-
CCM_05089	155.342	374.938	1.27121	0.00135618	0.02793	NW_006271972.1	-	-	sordNOG08374;COG5587;opiNOG10569	S	-	hypothetical protein	18167109	-	-	-	-
CCM_05678	342.35	3427.58	3.32365	0.00136194	0.02793	NW_006271972.1	-	-	-	-	-	hypothetical protein	18167696	-	-	-	-
CCM_02392	264.86	530.475	1.00205	0.00137047	0.0279856	NW_006271970.1	GO:0016829	K02295	opiNOG02695;sordNOG10342	TL	sp|Q923I8|CRY2_RAT Cryptochrome-2 OS=Rattus norvegicus GN=Cry2 PE=1 SV=1	cryptochrome-2	18164419	-	-	GO:0016829//lyase activity;	ko04710(Circadian rhythm)
CCM_09452	22.7281	69.1322	1.60488	0.00139278	0.0283209	NW_006271977.1	-	-	-	-	-	hypothetical protein	18171455	-	-	-	-
CCM_06436	72.7659	165.951	1.18942	0.00148715	0.0299096	NW_006271973.1	-	-	-	-	-	hypothetical protein	18168450	-	-	-	-
CCM_06796	136.367	824.895	2.59672	0.00155919	0.0307931	NW_006271973.1	GO:0008152;GO:0055085;GO:0016846;GO:0016021	K15111	opiNOG04502;sordNOG11647	C	sp|O60029|PET8_ASHGO Putative mitochondrial carrier protein PET8 OS=Ashbya gossypii (strain ATCC 10895 / CBS 109.51 / FGSC 9923 / NRRL Y-1056) GN=PET8 PE=3 SV=1	Mitochondrial carrier protein PET8	18168807	GO:0008152//metabolic process;GO:0055085//transmembrane transport;	GO:0016021//integral component of membrane;	GO:0016846//carbon-sulfur lyase activity;	-
CCM_01941	205.958	651.443	1.66129	0.00160629	0.0314011	NW_006271970.1	GO:0050661;GO:0016021;GO:0055114;GO:0050660;GO:0004499	-	opiNOG11270	R	sp|Q9I3H5|BVMO_PSEAE Baeyer-Villiger monooxygenase OS=Pseudomonas aeruginosa (strain ATCC 15692 / DSM 22644 / CIP 104116 / JCM 14847 / LMG 12228 / 1C / PRS 101 / PAO1) GN=PA1538 PE=1 SV=1	monooxygenase, putative	18163970	GO:0055114//obsolete oxidation-reduction process;	GO:0016021//integral component of membrane;	GO:0050661//NADP binding;GO:0050660//flavin adenine dinucleotide binding;GO:0004499//N,N-dimethylaniline monooxygenase activity;	-
CCM_03722	475.517	980.574	1.04413	0.00165995	0.0322663	NW_006271971.1	GO:0016021;GO:0055114;GO:0006629;GO:0016491	K13076	opiNOG06707;sordNOG10950;sorNOG07032	I	sp|Q6CMK7|SLD1_KLULA Delta 8-(E)-sphingolipid desaturase OS=Kluyveromyces lactis (strain ATCC 8585 / CBS 2359 / DSM 70799 / NBRC 1267 / NRRL Y-1140 / WM37) GN=SLD PE=3 SV=1	delta 8-(E)-sphingolipid desaturase	18165746	GO:0055114//obsolete oxidation-reduction process;GO:0006629//lipid metabolic process;	GO:0016021//integral component of membrane;	GO:0016491//oxidoreductase activity;	-
CCM_07237	76.1368	181.287	1.25161	0.00169145	0.0326675	NW_006271973.1	-	-	sorNOG02958;opiNOG47307	QS	-	hypothetical protein	18169248	-	-	-	-
CCM_08189	130.026	319.739	1.29809	0.0017121	0.033	NW_006271974.1	GO:0000155;GO:0023014;GO:0005622;GO:0000160	-	opiNOG15245;sordNOG09577	S	sp|O48963|PHOT1_ARATH Phototropin-1 OS=Arabidopsis thaliana GN=PHOT1 PE=1 SV=1	PAS-like protein	18170198	GO:0000160//phosphorelay signal transduction system;	GO:0005622//intracellular anatomical structure;	GO:0000155//phosphorelay sensor kinase activity;	-
CCM_07260	7978.82	21551.6	1.43355	0.0017239	0.0331238	NW_006271973.1	-	-	-	-	-	hypothetical protein	18169271	-	-	-	-
CCM_06030	155.768	318.778	1.03315	0.00177003	0.0337112	NW_006271972.1	-	-	-	-	-	hypothetical protein	18168047	-	-	-	-
CCM_09195	136.155	281.668	1.04874	0.00181821	0.0343568	NW_006271976.1	-	-	-	-	-	hypothetical protein	18171198	-	-	-	-
CCM_04666	29.0856	169.927	2.54654	0.00189951	0.0354747	NW_006271971.1	GO:0008080	-	hypNOG01987	R	-	GNAT family N-acetyltransferase	18166688	-	-	GO:0008080//N-acetyltransferase activity;	-
CCM_09656	61.3386	142.249	1.21356	0.00203387	0.0373781	NW_006271978.1	GO:0016021	-	sordNOG07363	E	sp|P38680|MTR_NEUCR N amino acid transport system protein OS=Neurospora crassa (strain ATCC 24698 / 74-OR23-1A / CBS 708.71 / DSM 1257 / FGSC 987) GN=mtr PE=3 SV=2	amino acid transporter	18171658	-	GO:0016021//integral component of membrane;	-	-
CCM_04332	61.8223	143.165	1.21148	0.00207943	0.0380228	NW_006271971.1	-	-	-	-	-	hypothetical protein	18166355	-	-	-	-
CCM_04795	154.134	353.171	1.19618	0.00209208	0.0380371	NW_006271971.1	GO:0008168;GO:0032259	-	opiNOG17222;sordNOG04992;opiNOG19554;sordNOG11074	S	sp|Q2UPB6|ACLN_ASPOR Aspirochlorine biosynthesis protein N OS=Aspergillus oryzae (strain ATCC 42149 / RIB 40) GN=aclN PE=4 SV=1	methyltransferase	18166816	GO:0032259//methylation;	-	GO:0008168//methyltransferase activity;	-
CCM_02163	1886.62	4154.54	1.13889	0.00213728	0.0387857	NW_006271970.1	GO:0016021;GO:0006817;GO:0051604	-	sordNOG04527;opiNOG08565	P	sp|P38264|PHO88_YEAST SRP-independent targeting protein 3 OS=Saccharomyces cerevisiae (strain ATCC 204508 / S288c) GN=PHO88 PE=1 SV=1	inorganic phosphate transporter	18164191	GO:0006817//phosphate ion transport;GO:0051604//protein maturation;	GO:0016021//integral component of membrane;	-	-
CCM_08339	58.0041	130.853	1.17372	0.00223013	0.0401652	NW_006271975.1	GO:0016021	-	opiNOG42198;sorNOG05773;opiNOG42754;pleNOG05675	S	-	hypothetical protein	18170347	-	GO:0016021//integral component of membrane;	-	-
CCM_00297	58.7412	272.607	2.21438	0.00229436	0.0410934	NW_006271969.1	GO:0016884	-	sorNOG08092;opiNOG07924;sordNOG05310	SR	sp|Q4J965|GATA_SULAC Glutamyl-tRNA(Gln) amidotransferase subunit A OS=Sulfolobus acidocaldarius (strain ATCC 33909 / DSM 639 / JCM 8929 / NBRC 15157 / NCIMB 11770) GN=gatA PE=3 SV=1	amidase, putative	18162332	-	-	GO:0016884//carbon-nitrogen ligase activity, with glutamine as amido-N-donor;	-
CCM_09373	1444.94	3286.04	1.18534	0.00238937	0.0424787	NW_006271977.1	-	-	opiNOG36175;sordNOG13204	R	-	expression library immunization antigen 1	18171376	-	-	-	-
CCM_09310	54.6223	124.554	1.18921	0.00246721	0.0435406	NW_006271976.1	-	-	-	-	-	hypothetical protein	18171313	-	-	-	-
CCM_05357	336.573	674.179	1.00221	0.00253245	0.0445286	NW_006271972.1	-	-	-	-	-	hypothetical protein	18167375	-	-	-	-
CCM_04426	175.37	356.302	1.02269	0.00256511	0.0449385	NW_006271971.1	GO:0031225;GO:0016740;GO:0005886;GO:0005975	K22832	sordNOG08489;sorNOG06835	R	sp|P56092|EPD1_CANMA Protein EPD1 OS=Candida maltosa GN=EPD1 PE=3 SV=1	1,3-beta-glucanosyltransferase, putative	18166449	GO:0005975//carbohydrate metabolic process;	GO:0031225//anchored component of membrane;GO:0005886//plasma membrane;	GO:0016740//transferase activity;	-
CCM_08794	91.0967	271.322	1.57454	0.00260816	0.0454443	NW_006271975.1	-	-	hypNOG00840;opiNOG51909;necNOG09955	S	-	hypothetical protein	18170799	-	-	-	-
CCM_09375	220.933	771.152	1.8034	0.002651	0.0460537	NW_006271977.1	GO:0016884	K01426	opiNOG52216;COG0154;sordNOG08113	J	sp|Q9URY4|YI01_SCHPO Putative amidase C869.01 OS=Schizosaccharomyces pombe (strain 972 / ATCC 24843) GN=SPAC869.01 PE=3 SV=1	amidase family protein	18171378	-	-	GO:0016884//carbon-nitrogen ligase activity, with glutamine as amido-N-donor;	ko00643(Styrene degradation);ko00627(Aminobenzoate degradation);ko00380(Tryptophan metabolism);ko00360(Phenylalanine metabolism);ko00330(Arginine and proline metabolism)
CCM_04804	40132.8	138672	1.78882	0.00266229	0.0460537	NW_006271971.1	GO:0005524	K03283	sordNOG10587;opiNOG02241	O	sp|Q01233|HSP70_NEUCR Heat shock 70 kDa protein OS=Neurospora crassa (strain ATCC 24698 / 74-OR23-1A / CBS 708.71 / DSM 1257 / FGSC 987) GN=hsps-1 PE=2 SV=2	heat shock 70 kDa protein	18166825	-	-	GO:0005524//ATP binding;	ko05417(Lipid and atherosclerosis);ko05162(Measles);ko05145(Toxoplasmosis);ko05134(Legionellosis);ko05020(Prion disease);ko04915(Estrogen signaling pathway);ko04612(Antigen processing and presentation);ko04213(Longevity regulating pathway - multiple species);ko04144(Endocytosis);ko04141(Protein processing in endoplasmic reticulum);ko04010(MAPK signaling pathway);ko03040(Spliceosome)
CCM_07085	116.078	766.452	2.7231	0.00269812	0.0465899	NW_006271973.1	GO:0004185;GO:0006508	-	opiNOG16370;opiNOG18368;pleNOG08261	OE	sp|C5FW30|SPCA_ARTOC Carboxypeptidase S1 homolog A OS=Arthroderma otae (strain ATCC MYA-4605 / CBS 113480) GN=SCPA PE=3 SV=1	serine carboxypeptidase, putative	18169096	GO:0006508//proteolysis;	-	GO:0004185//serine-type carboxypeptidase activity;	-
CCM_03327	0.987005	91.817	6.53956	0.00279293	0.047883	NW_006271970.1	GO:0016021	-	opiNOG48115	S	-	hypothetical protein	18165353	-	GO:0016021//integral component of membrane;	-	-
CCM_06992	24.1679	67.5477	1.48281	0.0028044	0.0479941	NW_006271973.1	-	-	-	-	-	hypothetical protein	18169003	-	-	-	-
CCM_04509	17.1917	53.9334	1.64947	0.00285728	0.0485536	NW_006271971.1	-	-	-	-	-	hypothetical protein	18166532	-	-	-	-
CCM_09604	7788.77	16745.7	1.10432	0.00298494	0.0504068	NW_006271978.1	-	-	opiNOG63745;sordNOG05240	SO	-	hypothetical protein	18171606	-	-	-	-
CCM_08063	80.4872	614.353	2.93224	0.00299254	0.0504068	NW_006271974.1	-	-	hypNOG09131;opiNOG68108	S	-	hypothetical protein	18170072	-	-	-	-
CCM_09603	15.8507	67.7924	2.09657	0.00305363	0.0511669	NW_006271978.1	-	-	-	-	-	hypothetical protein	18171605	-	-	-	-
CCM_05850	140.17	331.428	1.24152	0.00312431	0.0521694	NW_006271972.1	GO:0016021	-	sordNOG12799;opiNOG42584	S	-	hypothetical protein	18167868	-	GO:0016021//integral component of membrane;	-	-
CCM_01231	332.862	833.44	1.32415	0.00316859	0.0527878	NW_006271969.1	GO:0016831;GO:0000287;GO:0030976	K01568	sorNOG01367;sordNOG08207	HE	sp|Q4WXX9|PDC_ASPFU Pyruvate decarboxylase OS=Neosartorya fumigata (strain ATCC MYA-4609 / Af293 / CBS 101355 / FGSC A1100) GN=pdcA PE=3 SV=1	pyruvate decarboxylase	18163263	-	-	GO:0016831//carboxy-lyase activity;GO:0000287//magnesium ion binding;GO:0030976//thiamine pyrophosphate binding;	ko00010(Glycolysis / Gluconeogenesis)
CCM_00162	112.077	539.17	2.26625	0.00317781	0.0527878	NW_006271969.1	-	-	-	-	-	hypothetical protein	18162197	-	-	-	-
CCM_00572	11.3384	76.742	2.7588	0.00325615	0.0536262	NW_006271969.1	-	-	-	-	-	hypothetical protein	18162607	-	-	-	-
CCM_05773	14.9259	1923.52	7.00979	0.00331182	0.0543568	NW_006271972.1	-	-	necNOG12968;opiNOG60451;sordNOG15713;opiNOG45647	S	-	hypothetical protein	18167791	-	-	-	-
CCM_08443	0	8.88621	Inf	0.00332517	0.054483	NW_006271975.1	-	-	-	-	-	hypothetical protein	18170450	-	-	-	-
CCM_04050	7.13212	32.0592	2.16834	0.00335568	0.054782	NW_006271971.1	-	-	-	-	-	hypothetical protein	18166073	-	-	-	-
CCM_08892	8.4546	38.899	2.20193	0.00336051	0.054782	NW_006271975.1	GO:0016021	-	necNOG08223;opiNOG27391;hypNOG11573	S	-	hypothetical protein	18170897	-	GO:0016021//integral component of membrane;	-	-
CCM_07327	2675.26	11560.8	2.11149	0.00339278	0.0552145	NW_006271974.1	-	-	-	-	-	hypothetical protein	18169338	-	-	-	-
CCM_03631	142.495	667.977	2.22889	0.00352518	0.0567489	NW_006271971.1	GO:0008152;GO:0016787	-	COG1473;opiNOG17017	ER	sp|A3KG59|P20D2_MOUSE Peptidase M20 domain-containing protein 2 OS=Mus musculus GN=Pm20d2 PE=1 SV=1	amidohydrolase, putative	18165657	GO:0008152//metabolic process;	-	GO:0016787//hydrolase activity;	-
CCM_07920	11.4167	41.2844	1.85445	0.00356932	0.0570261	NW_006271974.1	-	-	-	-	-	hypothetical protein	18169930	-	-	-	-
CCM_00276	2.78076	19.0039	2.77274	0.00362239	0.0576824	NW_006271969.1	-	-	-	-	-	hypothetical protein	18162311	-	-	-	-
CCM_04253	55.4105	181.079	1.70839	0.00374681	0.0593687	NW_006271971.1	-	-	opiNOG43301;opiNOG60496;euroNOG13081;eurotNOG13000	RS	-	hypothetical protein	18166276	-	-	-	-
CCM_00671	2.48931	19.0393	2.93516	0.00375451	0.0593929	NW_006271969.1	-	-	-	-	-	hypothetical protein	18162705	-	-	-	-
CCM_06174	87.5929	182.841	1.06171	0.00380363	0.0598744	NW_006271972.1	-	-	-	-	-	hypothetical protein	18168189	-	-	-	-
CCM_09660	3574.94	9105.98	1.3489	0.00396208	0.062064	NW_006271978.1	GO:0005737;GO:0016021	-	opiNOG27250;opiNOG30939;sordNOG15578	S	sp|Q9UTI9|YKZ2_SCHPO UPF0591 membrane protein C15E1.02c OS=Schizosaccharomyces pombe (strain 972 / ATCC 24843) GN=SPAC15E1.02c PE=3 SV=1	hypothetical protein	18171662	-	GO:0005737//cytoplasm;GO:0016021//integral component of membrane;	-	-
CCM_06800	26.844	71.773	1.41884	0.00409112	0.0635677	NW_006271973.1	-	-	-	-	-	hypothetical protein	18168811	-	-	-	-
CCM_08496	3920.33	9042.72	1.20578	0.0041605	0.0639228	NW_006271975.1	GO:0006457;GO:0000413;GO:0003755	K05864	sordNOG05497;opiNOG02177	O	sp|Q4HXF6|PPID_GIBZE Peptidyl-prolyl cis-trans isomerase D OS=Gibberella zeae (strain PH-1 / ATCC MYA-4620 / FGSC 9075 / NRRL 31084) GN=CPR6 PE=3 SV=1	peptidyl-prolyl cis-trans isomerase	18170503	GO:0006457//protein folding;GO:0000413//protein peptidyl-prolyl isomerization;	-	GO:0003755//peptidyl-prolyl cis-trans isomerase activity;	ko05131(Shigellosis);ko05022(Pathways of neurodegeneration - multiple diseases);ko05010(Alzheimer disease);ko04218(Cellular senescence);ko04217(Necroptosis)
CCM_08919	164.222	483.8	1.55876	0.00426435	0.0651024	NW_006271975.1	-	-	hypNOG12757;necNOG13939	S	-	hypothetical protein	18170924	-	-	-	-
CCM_04284	3228.22	6984.25	1.11337	0.00431799	0.0658168	NW_006271971.1	GO:0005215;GO:0055085;GO:0016021	-	sordNOG07241;opiNOG03856;sorNOG03296	R	sp|P25351|YCR3_YEAST Uncharacterized membrane protein YCR023C OS=Saccharomyces cerevisiae (strain ATCC 204508 / S288c) GN=YCR023C PE=1 SV=2	MFS transporter	18166307	GO:0055085//transmembrane transport;	GO:0016021//integral component of membrane;	GO:0005215//transporter activity;	-
CCM_03543	60.2651	133.336	1.14567	0.00438139	0.0662864	NW_006271970.1	GO:0016787	K07025	opiNOG70312;sordNOG04167	R	sp|Q58832|G3PP_METJA Glyceraldehyde 3-phosphate phosphatase OS=Methanocaldococcus jannaschii (strain ATCC 43067 / DSM 2661 / JAL-1 / JCM 10045 / NBRC 100440) GN=MJ1437 PE=3 SV=1	Haloacid dehalogenase-like hydrolase	18165569	-	-	GO:0016787//hydrolase activity;	-
CCM_03774	0.300307	20.5071	6.09354	0.00446846	0.0667586	NW_006271971.1	-	-	-	-	-	hypothetical protein	18165797	-	-	-	-
CCM_01629	29.5422	187.618	2.66695	0.00447001	0.0667586	NW_006271969.1	GO:0005524;GO:0016021;GO:0098655;GO:0046872;GO:0019829	K01536	sordNOG07740	P	sp|P22189|ATC3_SCHPO Calcium-transporting ATPase 3 OS=Schizosaccharomyces pombe (strain 972 / ATCC 24843) GN=cta3 PE=1 SV=1	potassium/sodium efflux P-type ATPase	18163659	GO:0098655//cation transmembrane transport;	GO:0016021//integral component of membrane;	GO:0005524//ATP binding;GO:0046872//metal ion binding;GO:0019829//ATPase-coupled cation transmembrane transporter activity;	-
CCM_08791	51.7392	115.651	1.16045	0.00449179	0.06698	NW_006271975.1	GO:0016021	-	-	-	-	hypothetical protein	18170796	-	GO:0016021//integral component of membrane;	-	-
CCM_08093	67.0916	152.031	1.18016	0.00461346	0.0683704	NW_006271974.1	GO:0006351;GO:0008270;GO:0003677;GO:0005634	-	opiNOG28834;hypNOG04116;treNOG04634	SR	-	hypothetical protein	18170102	GO:0006351//transcription, DNA-templated;	GO:0005634//nucleus;	GO:0008270//zinc ion binding;GO:0003677//DNA binding;	-
CCM_07328	2881.46	6035.22	1.06661	0.00461347	0.0683704	NW_006271974.1	-	K14018	sordNOG06883	I	sp|O94289|LUB1_SCHPO Ubiquitin homeostasis protein lub1 OS=Schizosaccharomyces pombe (strain 972 / ATCC 24843) GN=lub1 PE=1 SV=2	polyubiquitin binding protein (Doa1/Ufd3), putative	18169339	-	-	-	ko04141(Protein processing in endoplasmic reticulum)
CCM_05476	604.993	2114.55	1.80536	0.00474452	0.0695032	NW_006271972.1	-	-	sordNOG13916;opiNOG44854	S	-	hypothetical protein	18167494	-	-	-	-
CCM_03477	77.1136	167.161	1.11618	0.00475591	0.0695032	NW_006271970.1	GO:0005576;GO:0009405	-	necNOG14031	S	sp|Q90121|KP4T_UMV4 KP4 killer toxin OS=Ustilago maydis P4 virus GN=M2A PE=1 SV=1	Killer toxin, Kp4/SMK-like, core	18165503	GO:0009405//obsolete pathogenesis;	GO:0005576//extracellular region;	-	-
CCM_08732	127.043	269.71	1.08609	0.00501488	0.0723136	NW_006271975.1	GO:0004553;GO:0005975;GO:0030246	-	sorNOG03956;opiNOG55844;sordNOG12467	R	sp|B0XTU6|EGLX_ASPFC Probable endo-1,3(4)-beta-glucanase AFUB_029980 OS=Neosartorya fumigata (strain CEA10 / CBS 144.89 / FGSC A1163) GN=AFUB_029980 PE=3 SV=1	endo-1,3(4)-beta-glucanase, putative	18170737	GO:0005975//carbohydrate metabolic process;	-	GO:0004553//hydrolase activity, hydrolyzing O-glycosyl compounds;GO:0030246//carbohydrate binding;	-
CCM_07956	53.0458	116.888	1.13981	0.00515206	0.0738487	NW_006271974.1	GO:0008152	-	sordNOG14614;opiNOG44565;opiNOG59103	SL	-	hypothetical protein	18169966	GO:0008152//metabolic process;	-	-	-
CCM_00468	862.971	5237.44	2.60148	0.00519547	0.0742497	NW_006271969.1	-	-	sordNOG14958;hypNOG14250;opiNOG46620	S	-	hypothetical protein	18162503	-	-	-	-
CCM_06613	1034.32	4340.67	2.06923	0.00521355	0.0743744	NW_006271973.1	-	K01735	sordNOG08654;opiNOG12273	E	sp|Q3M6C3|DDGS_ANAVT Demethyl-4-deoxygadusol synthase OS=Anabaena variabilis (strain ATCC 29413 / PCC 7937) GN=Ava_3858 PE=1 SV=1	2-epi-5-epi-valiolone synthase	18168627	-	-	-	ko00400(Phenylalanine, tyrosine and tryptophan biosynthesis)
CCM_03361	423.331	861.288	1.02471	0.0052274	0.0743744	NW_006271970.1	-	-	sordNOG11177;opiNOG12145	S	-	hypothetical protein	18165387	-	-	-	-
CCM_08771	230.429	515.156	1.16069	0.00532488	0.0756495	NW_006271975.1	GO:0016021;GO:0003824;GO:0031177;GO:0008152	-	opiNOG06635;opiNOG24463	I	sp|Q70LM4|LGRD_BREPA Linear gramicidin synthase subunit D OS=Brevibacillus parabrevis GN=lgrD PE=1 SV=1	non-ribosomal peptide synthetase	18170776	GO:0008152//metabolic process;	GO:0016021//integral component of membrane;	GO:0003824//catalytic activity;GO:0031177//phosphopantetheine binding;	-
CCM_02118	102.582	237.295	1.20991	0.00534817	0.0758248	NW_006271970.1	GO:0008080	-	opiNOG45686;eurotNOG12517;opiNOG27023	RS	-	Acyl-CoA N-acyltransferase	18164146	-	-	GO:0008080//N-acetyltransferase activity;	-
CCM_07955	16.7011	53.5729	1.68156	0.005374	0.0758989	NW_006271974.1	GO:0055085;GO:0016021	-	KOG2533;opiNOG02197;opiNOG51676	G	sp|O74923|YJ7D_SCHPO Uncharacterized transporter C757.13 OS=Schizosaccharomyces pombe (strain 972 / ATCC 24843) GN=SPCC757.13 PE=3 SV=1	vitamin H transporter, putative	18169965	GO:0055085//transmembrane transport;	GO:0016021//integral component of membrane;	-	-
CCM_04034	4620.2	9439.06	1.03069	0.00538772	0.0759811	NW_006271971.1	GO:0006355;GO:0003677;GO:0003700	K12769	sordNOG05962;opiNOG09997	SK	sp|Q9C2N1|VIB1_NEUCR Transcription factor vib-1 OS=Neurospora crassa (strain ATCC 24698 / 74-OR23-1A / CBS 708.71 / DSM 1257 / FGSC 987) GN=vib-1 PE=4 SV=1	NDT80 / PhoG like DNA-binding family protein	18166057	GO:0006355//regulation of transcription, DNA-templated;	-	GO:0003677//DNA binding;GO:0003700//DNA-binding transcription factor activity;	ko04113(Meiosis - yeast)
CCM_08833	84.9243	177.146	1.06069	0.00541265	0.0761246	NW_006271975.1	GO:0016491;GO:0008270;GO:0055114	-	COG0604;opiNOG79815;opiNOG13342	C	sp|K4BW79|ENOX_SOLLC 2-methylene-furan-3-one reductase OS=Solanum lycopersicum GN=EO PE=1 SV=1	alcohol dehydrogenase, putative	18170838	GO:0055114//obsolete oxidation-reduction process;	-	GO:0016491//oxidoreductase activity;GO:0008270//zinc ion binding;	-
CCM_09402	4.7208	29.0098	2.61943	0.00546913	0.0767914	NW_006271977.1	-	-	-	-	-	hypothetical protein	18171405	-	-	-	-
CCM_08007	2.32566	17.07	2.87575	0.00563989	0.0789585	NW_006271974.1	-	-	-	-	-	hypothetical protein	18170016	-	-	-	-
CCM_00824	90.8113	185.384	1.02958	0.0057856	0.0802971	NW_006271969.1	GO:0008152;GO:0016787	-	sordNOG10496	R	sp|O28058|Y2225_ARCFU Uncharacterized protein AF_2225 OS=Archaeoglobus fulgidus (strain ATCC 49558 / VC-16 / DSM 4304 / JCM 9628 / NBRC 100126) GN=AF_2225 PE=3 SV=1	fumarylacetoacetate hydrolase	18162858	GO:0008152//metabolic process;	-	GO:0016787//hydrolase activity;	-
CCM_07134	138.321	304.877	1.14021	0.00615726	0.0837631	NW_006271973.1	GO:0046872	-	hypNOG13947	R	-	hypothetical protein	18169145	-	-	GO:0046872//metal ion binding;	-
CCM_06345	607.872	1247.28	1.03695	0.00618563	0.0840302	NW_006271972.1	GO:0016020;GO:0005634;GO:0005829;GO:0006751;GO:0003839	K07232	opiNOG22271;sorNOG02267;sordNOG05081;sordNOG09318	P	sp|P87305|CHAC_SCHPO Glutathione-specific gamma-glutamylcyclotransferase OS=Schizosaccharomyces pombe (strain 972 / ATCC 24843) GN=SPBC31F10.03 PE=3 SV=1	ChaC-like protein	18168359	GO:0006751//glutathione catabolic process;	GO:0016020//membrane;GO:0005634//nucleus;GO:0005829//cytosol;	GO:0003839//gamma-glutamylcyclotransferase activity;	ko00480(Glutathione metabolism)
CCM_01529	187.677	1554.45	3.05008	0.00627366	0.0846805	NW_006271969.1	GO:0016021	-	sordNOG05215	R	sp|Q9USG8|MU190_SCHPO Meiotically up-regulated gene 190 protein OS=Schizosaccharomyces pombe (strain 972 / ATCC 24843) GN=mug190 PE=1 SV=1	C2 domain protein	18163560	-	GO:0016021//integral component of membrane;	-	-
CCM_09391	320.03	802.938	1.32708	0.00640723	0.0859258	NW_006271977.1	-	-	-	-	-	hypothetical protein	18171394	-	-	-	-
CCM_08807	5.43296	25.1457	2.2105	0.00646414	0.0860738	NW_006271975.1	-	-	-	-	-	hypothetical protein	18170812	-	-	-	-
CCM_00758	3659.14	14570.9	1.99351	0.00659889	0.0873014	NW_006271969.1	-	-	sorNOG01340;opiNOG08143;sordNOG06823	R	sp|Q03104|MSC1_YEAST Meiotic sister chromatid recombination protein 1 OS=Saccharomyces cerevisiae (strain ATCC 204508 / S288c) GN=MSC1 PE=1 SV=1	stress response protein (Ish1), putative	18162792	-	-	-	-
CCM_01014	2506.2	5678.09	1.17991	0.0066947	0.0880844	NW_006271969.1	GO:0006355;GO:0005634;GO:0007623;GO:0005737	-	sordNOG05289	K	sp|Q00586|FRQ_TRISN Frequency clock protein OS=Trichoderma spinulosum GN=FRQ PE=3 SV=1	frequency clock protein	18163047	GO:0006355//regulation of transcription, DNA-templated;GO:0007623//circadian rhythm;	GO:0005634//nucleus;GO:0005737//cytoplasm;	-	-
CCM_03457	34.3035	89.4092	1.38207	0.00676514	0.0882865	NW_006271970.1	GO:0008152;GO:0016846	-	sordNOG14804;necNOG13377	S	-	putative glutathione-dependent formaldehyde-activating protein	18165483	GO:0008152//metabolic process;	-	GO:0016846//carbon-sulfur lyase activity;	-
CCM_03644	31.6768	104.491	1.72187	0.00683074	0.0886613	NW_006271971.1	-	-	-	-	-	hypothetical protein	18165670	-	-	-	-
CCM_03788	523.464	2527.29	2.27143	0.00684351	0.0887074	NW_006271971.1	GO:0022626;GO:0050790;GO:0000774;GO:0002181;GO:0071629;GO:0005634	K09562	sordNOG08193;sordNOG10808	O	sp|Q4I624|FES1_GIBZE Hsp70 nucleotide exchange factor FES1 OS=Gibberella zeae (strain PH-1 / ATCC MYA-4620 / FGSC 9075 / NRRL 31084) GN=FES1 PE=3 SV=1	Hsp70 nucleotide exchange factor (Fes1), putative	18165811	GO:0050790//regulation of catalytic activity;GO:0002181//cytoplasmic translation;GO:0071629//cytoplasm protein quality control by the ubiquitin-proteasome system;	GO:0022626//cytosolic ribosome;GO:0005634//nucleus;	GO:0000774//adenyl-nucleotide exchange factor activity;	ko04141(Protein processing in endoplasmic reticulum)
CCM_08102	59.9245	308.318	2.3632	0.00687995	0.0890598	NW_006271974.1	-	-	-	-	-	hypothetical protein	18170111	-	-	-	-
CCM_05598	6.8743	27.991	2.02568	0.00689126	0.0890862	NW_006271972.1	-	-	-	-	-	hypothetical protein	18167616	-	-	-	-
CCM_07107	69.493	140.538	1.01602	0.00700249	0.0902814	NW_006271973.1	-	-	opiNOG60496;opiNOG43301	S	-	hypothetical protein	18169118	-	-	-	-
CCM_03564	67.695	138.776	1.03563	0.00703217	0.0905427	NW_006271970.1	GO:0016787	-	opiNOG11890;sorNOG06403	R	sp|Q5B5P1|RGLC_EMENI Probable rhamnogalacturonate lyase C OS=Emericella nidulans (strain FGSC A4 / ATCC 38163 / CBS 112.46 / NRRL 194 / M139) GN=rglC PE=3 SV=1	phosphoesterase, putative	18165590	-	-	GO:0016787//hydrolase activity;	-
CCM_08490	5.31213	24.7801	2.22182	0.00728225	0.0933308	NW_006271975.1	-	-	-	-	-	hypothetical protein	18170497	-	-	-	-
CCM_06217	914.105	2565.7	1.48892	0.00728753	0.0933308	NW_006271972.1	-	K13993	NOG70193;hypNOG13011;sordNOG13627	O	sp|O14368|HSP16_SCHPO Heat shock protein 16 OS=Schizosaccharomyces pombe (strain 972 / ATCC 24843) GN=hsp16 PE=1 SV=1	HSP20-like chaperone	18168232	-	-	-	ko04141(Protein processing in endoplasmic reticulum)
CCM_00307	429.349	1328.29	1.62934	0.00743689	0.0942682	NW_006271969.1	-	K09702	opiNOG71068;opiNOG37498	RS	sp|Q5AW46|Y7484_EMENI Uncharacterized protein AN7484 OS=Emericella nidulans (strain FGSC A4 / ATCC 38163 / CBS 112.46 / NRRL 194 / M139) GN=AN7484 PE=1 SV=1	hypothetical protein	18162342	-	-	-	-
CCM_06395	5096.77	12528.5	1.29756	0.00788012	0.0985579	NW_006271972.1	GO:0005524;GO:1900035;GO:0046872;GO:0005634;GO:0006457;GO:0000226;GO:0051082;GO:0031072	K09503	sordNOG11121;sorNOG04123	O	sp|O74752|MAS5_SCHPO Mitochondrial protein import protein mas5 OS=Schizosaccharomyces pombe (strain 972 / ATCC 24843) GN=mas5 PE=3 SV=1	mitochondrial protein import protein MAS5	18168409	GO:1900035//negative regulation of cellular response to heat;GO:0006457//protein folding;GO:0000226//microtubule cytoskeleton organization;	GO:0005634//nucleus;	GO:0005524//ATP binding;GO:0046872//metal ion binding;GO:0051082//unfolded protein binding;GO:0031072//heat shock protein binding;	ko04141(Protein processing in endoplasmic reticulum)
CCM_05834	0.635355	15.0604	4.56705	0.00794061	0.099102	NW_006271972.1	GO:0016021;GO:0016491;GO:0055114	-	sordNOG08072	R	-	flavin-containing amine oxidasedehydrogenase, putative	18167852	GO:0055114//obsolete oxidation-reduction process;	GO:0016021//integral component of membrane;	GO:0016491//oxidoreductase activity;	-
CCM_09414	36.3045	83.79	1.20663	0.00814913	0.100873	NW_006271977.1	GO:0006310;GO:0005634;GO:0006260;GO:0006281;GO:0003677	K10740	sordNOG13584;opiNOG42109	L	sp|Q92374|RFA3_SCHPO Replication factor A protein 3 OS=Schizosaccharomyces pombe (strain 972 / ATCC 24843) GN=ssb3 PE=1 SV=1	DNA replication factor A subunit Ssb3	18171417	GO:0006310//DNA recombination;GO:0006260//DNA replication;GO:0006281//DNA repair;	GO:0005634//nucleus;	GO:0003677//DNA binding;	ko03460(Fanconi anemia pathway);ko03440(Homologous recombination);ko03430(Mismatch repair);ko03420(Nucleotide excision repair);ko03030(DNA replication)
CCM_00465	128.842	282.057	1.13039	0.00831108	0.102614	NW_006271969.1	GO:0016021	-	opiNOG35337	S	-	hypothetical protein	18162500	-	GO:0016021//integral component of membrane;	-	-
CCM_00632	684.696	2088.85	1.60917	0.00845126	0.103679	NW_006271969.1	GO:0016021	K17278	opiNOG29938;sordNOG12306;sorNOG06768	R	sp|Q12091|DAP1_YEAST Damage response protein 1 OS=Saccharomyces cerevisiae (strain ATCC 204508 / S288c) GN=DAP1 PE=1 SV=1	membrane-associated progesterone receptor component 1	18162667	-	GO:0016021//integral component of membrane;	-	-
CCM_09586	60.4979	126.048	1.05902	0.00862561	0.1053	NW_006271978.1	-	-	-	-	-	hypothetical protein	18171588	-	-	-	-
CCM_07923	58.3286	121.581	1.05965	0.00876429	0.106365	NW_006271974.1	-	-	opiNOG56764;opiNOG29745;sordNOG12740	S	-	hypothetical protein	18169933	-	-	-	-
CCM_05556	1833.69	4243.23	1.21041	0.00878084	0.106365	NW_006271972.1	GO:0005634;GO:0000981;GO:0006357;GO:0008270	-	magNOG04281;sordNOG09251;opiNOG16598;necNOG11417	S	sp|O13360|FLUF_NEUCR Conidial development protein fluffy OS=Neurospora crassa (strain ATCC 24698 / 74-OR23-1A / CBS 708.71 / DSM 1257 / FGSC 987) GN=fl PE=2 SV=1	Fungal transcriptional regulatory protein	18167574	GO:0006357//regulation of transcription by RNA polymerase II;	GO:0005634//nucleus;	GO:0000981//DNA-binding transcription factor activity, RNA polymerase II-specific;GO:0008270//zinc ion binding;	-
CCM_07247	31.8455	73.5363	1.20737	0.00912827	0.109608	NW_006271973.1	GO:0006810;GO:0016021	K15111	sordNOG04853	C	sp|Q5U680|SAMC_MOUSE S-adenosylmethionine mitochondrial carrier protein OS=Mus musculus GN=Slc25a26 PE=1 SV=2	mitochondrial carrier protein, putative	18169258	GO:0006810//transport;	GO:0016021//integral component of membrane;	-	-
CCM_09625	29.7549	70.3288	1.24099	0.0094099	0.112149	NW_006271978.1	-	-	-	-	-	hypothetical protein	18171627	-	-	-	-
CCM_04834	8.40326	33.8109	2.00847	0.00953505	0.1135	NW_006271971.1	-	-	-	-	-	hypothetical protein	18166855	-	-	-	-
CCM_00940	493.922	1116.6	1.17675	0.0095938	0.113917	NW_006271969.1	GO:0016021	K20815	NOG62480;opiNOG29361;sordNOG13194	S	sp|Q9URV4|YBL7_SCHPO Uncharacterized protein C106.07c OS=Schizosaccharomyces pombe (strain 972 / ATCC 24843) GN=SPBC106.07c PE=4 SV=1	hypothetical protein	18162973	-	GO:0016021//integral component of membrane;	-	-
CCM_06821	516.749	11028.9	4.41568	0.00972089	0.114859	NW_006271973.1	-	-	euNOG57990;sordNOG12193	O	sp|P19752|HSP30_NEUCR 30 kDa heat shock protein OS=Neurospora crassa (strain ATCC 24698 / 74-OR23-1A / CBS 708.71 / DSM 1257 / FGSC 987) GN=hsp30 PE=3 SV=1	30 kDa heat shock protein	18168832	-	-	-	-
CCM_09207	1931.81	4414.88	1.19242	0.00974624	0.115018	NW_006271976.1	GO:0006807;GO:0016810	K01501	sordNOG04133;COG0388;opiNOG19344	RE	sp|A2RA31|NIT2_ASPNC Arylacetonitrilase OS=Aspergillus niger (strain CBS 513.88 / FGSC A1513) GN=An18g01740 PE=1 SV=1	aliphatic nitrilase, putative	18171210	GO:0006807//nitrogen compound metabolic process;	-	GO:0016810//hydrolase activity, acting on carbon-nitrogen (but not peptide) bonds;	ko00910(Nitrogen metabolism);ko00643(Styrene degradation);ko00627(Aminobenzoate degradation);ko00460(Cyanoamino acid metabolism);ko00380(Tryptophan metabolism)
CCM_01544	122.777	450.682	1.87607	0.00977881	0.115261	NW_006271969.1	GO:0005509	-	sordNOG08594;COG5126	ZRTD	sp|Q9UUG5|MLR1_SCHPO Myosin regulatory light chain 1 OS=Schizosaccharomyces pombe (strain 972 / ATCC 24843) GN=rlc1 PE=1 SV=1	calmodulin, putative	18163575	-	-	GO:0005509//calcium ion binding;	-
CCM_08985	2.46309	15.6319	2.66595	0.00981882	0.115434	NW_006271975.1	GO:0015035;GO:0055114	-	opiNOG39526;sordNOG09278;opiNOG22229	RS	sp|P39598|YWBO_BACSU Uncharacterized protein YwbO OS=Bacillus subtilis (strain 168) GN=ywbO PE=4 SV=1	thioredoxin, putative	18170989	GO:0055114//obsolete oxidation-reduction process;	-	GO:0015035//protein-disulfide reductase activity;	-
CCM_04021	37.0619	81.659	1.13967	0.0101122	0.117463	NW_006271971.1	-	-	-	-	-	hypothetical protein	18166044	-	-	-	-
CCM_08120	10.0005	33.3268	1.73661	0.0103881	0.120005	NW_006271974.1	-	-	-	-	-	hypothetical protein	18170129	-	-	-	-
CCM_07755	51.7392	263.949	2.35093	0.0104429	0.120126	NW_006271974.1	-	-	sordNOG15256	S	-	hypothetical protein	18169765	-	-	-	-
CCM_07981	33.4718	95.313	1.50973	0.0104767	0.120126	NW_006271974.1	-	-	-	-	-	hypothetical protein	18169991	-	-	-	-
CCM_05354	6.72759	31.7686	2.23944	0.0107835	0.122018	NW_006271972.1	-	-	opiNOG65551;hypNOG12415	S	-	hypothetical protein	18167372	-	-	-	-
CCM_04384	45.8996	130.559	1.50815	0.010891	0.122573	NW_006271971.1	-	-	sordNOG09758	S	sp|P76481|YFBK_ECOLI Uncharacterized protein YfbK OS=Escherichia coli (strain K12) GN=yfbK PE=4 SV=1	U-box domain-containing protein	18166407	-	-	-	-
CCM_01565	135.555	340.387	1.32829	0.0110808	0.123513	NW_006271969.1	-	-	opiNOG63387;sordNOG15341	S	-	hypothetical protein	18163596	-	-	-	-
CCM_00909	87.9101	521.861	2.56957	0.011173	0.123873	NW_006271969.1	GO:0016787	-	sordNOG08788	T	sp|D4B1N9|LIP3_ARTBC Probable secreted lipase ARB_02369 OS=Arthroderma benhamiae (strain ATCC MYA-4681 / CBS 112371) GN=ARB_02369 PE=1 SV=1	extracellular lipase, putative	18162943	-	-	GO:0016787//hydrolase activity;	-
CCM_09652	567.329	1257.07	1.14781	0.0120425	0.131024	NW_006271978.1	GO:0042802;GO:0003935;GO:0005829;GO:0009231	K01497	opiNOG04985;sordNOG07720	H	sp|Q9P7M9|RIB1_SCHPO Probable GTP cyclohydrolase-2 OS=Schizosaccharomyces pombe (strain 972 / ATCC 24843) GN=rib1 PE=3 SV=1	GTP cyclohydrolase-2	18171654	GO:0009231//riboflavin biosynthetic process;	GO:0005829//cytosol;	GO:0042802//identical protein binding;GO:0003935//GTP cyclohydrolase II activity;	ko02024(Quorum sensing);ko00790(Folate biosynthesis);ko00740(Riboflavin metabolism)
CCM_03220	100.694	217.016	1.10782	0.0121866	0.132442	NW_006271970.1	GO:0003677;GO:0005524;GO:0006281;GO:0006310;GO:0003910;GO:0006266	K10777	sordNOG08596	S	sp|A8N936|DNLI4_COPC7 DNA ligase 4 OS=Coprinopsis cinerea (strain Okayama-7 / 130 / ATCC MYA-4618 / FGSC 9003) GN=LIG4 PE=3 SV=2	ATP dependent DNA ligase domain protein	18165246	GO:0006281//DNA repair;GO:0006310//DNA recombination;GO:0006266//DNA ligation;	-	GO:0003677//DNA binding;GO:0005524//ATP binding;GO:0003910//DNA ligase (ATP) activity;	ko03450(Non-homologous end-joining)
CCM_03467	6.66816	25.7111	1.94703	0.0127901	0.136079	NW_006271970.1	GO:0009405;GO:0005576	-	necNOG14031	S	sp|Q90121|KP4T_UMV4 KP4 killer toxin OS=Ustilago maydis P4 virus GN=M2A PE=1 SV=1	Killer toxin, Kp4/SMK-like, core	18165493	GO:0009405//obsolete pathogenesis;	GO:0005576//extracellular region;	-	-
CCM_01903	14.7719	41.1948	1.47961	0.0130297	0.137233	NW_006271969.1	GO:0004185;GO:0006508	K01288	pleNOG00112;opiNOG06570;sordNOG06057	EO	sp|D4AQA7|PEPS_ARTBC Probable serine carboxypeptidase ARB_06414 OS=Arthroderma benhamiae (strain ATCC MYA-4681 / CBS 112371) GN=ARB_06414 PE=1 SV=1	carboxypeptidase cpdS	18163932	GO:0006508//proteolysis;	-	GO:0004185//serine-type carboxypeptidase activity;	-
CCM_00372	15.9627	42.7988	1.42286	0.013328	0.139763	NW_006271969.1	GO:0016884;GO:0016740	-	opiNOG06348;pleNOG03061	J	sp|B7PDC5|GATA_IXOSC Glutamyl-tRNA(Gln) amidotransferase subunit A, mitochondrial OS=Ixodes scapularis GN=gatA PE=3 SV=1	glutamyl-tRNA(Gln) amidotransferase	18162407	-	-	GO:0016884//carbon-nitrogen ligase activity, with glutamine as amido-N-donor;GO:0016740//transferase activity;	-
CCM_02974	23.5981	120.927	2.35739	0.0134448	0.140557	NW_006271970.1	GO:0055085;GO:0016021	-	opiNOG03645;COG1840	RP	sp|D7PHY8|VRTL_PENAE Efflux pump vrtL OS=Penicillium aethiopicum GN=vrtL PE=1 SV=1	MFS multidrug transporter	18165001	GO:0055085//transmembrane transport;	GO:0016021//integral component of membrane;	-	-
CCM_08218	16.6941	45.7525	1.45451	0.0135932	0.141491	NW_006271974.1	-	-	-	-	-	hypothetical protein	18170226	-	-	-	-
CCM_05877	77.6711	159.882	1.04156	0.0139726	0.143577	NW_006271972.1	GO:0000981;GO:0005634;GO:0008270;GO:0006357;GO:0003677	-	opiNOG32292;opiNOG49749	KS	sp|P38699|STB5_YEAST Protein STB5 OS=Saccharomyces cerevisiae (strain ATCC 204508 / S288c) GN=STB5 PE=1 SV=1	C6 transcription factor, putative	18167895	GO:0006357//regulation of transcription by RNA polymerase II;	GO:0005634//nucleus;	GO:0000981//DNA-binding transcription factor activity, RNA polymerase II-specific;GO:0008270//zinc ion binding;GO:0003677//DNA binding;	-
CCM_05325	35.2994	87.1969	1.30463	0.014056	0.143973	NW_006271972.1	GO:0016021	-	-	-	-	hypothetical protein	18167343	-	GO:0016021//integral component of membrane;	-	-
CCM_02574	5.08905	21.099	2.05171	0.0142528	0.14537	NW_006271970.1	-	-	opiNOG46699;sordNOG15108	S	-	hypothetical protein	18164601	-	-	-	-
CCM_04910	380.202	878.929	1.20898	0.0145338	0.147177	NW_006271971.1	GO:0055114;GO:0004754;GO:0019878	K05665	opiNOG03462;NOG13157	E	sp|Q7SFX6|LYS1_NEUCR Saccharopine dehydrogenase [NAD(+), L-lysine-forming] OS=Neurospora crassa (strain ATCC 24698 / 74-OR23-1A / CBS 708.71 / DSM 1257 / FGSC 987) GN=NCU03118 PE=3 SV=1	saccharopine dehydrogenase	18166931	GO:0055114//obsolete oxidation-reduction process;GO:0019878//lysine biosynthetic process via aminoadipic acid;	-	GO:0004754//saccharopine dehydrogenase (NAD+, L-lysine-forming) activity;	ko05206(MicroRNAs in cancer);ko04977(Vitamin digestion and absorption);ko04071(Sphingolipid signaling pathway);ko02010(ABC transporters);ko01523(Antifolate resistance)
CCM_07672	54.2076	113.861	1.07071	0.0147609	0.148816	NW_006271974.1	GO:0016021	-	sordNOG11131;sorNOG06620;opiNOG01001	S	-	hypothetical protein	18169682	-	GO:0016021//integral component of membrane;	-	-
CCM_06738	50.433	101.657	1.01128	0.0148898	0.149177	NW_006271973.1	GO:0016021	-	-	-	-	hypothetical protein	18168751	-	GO:0016021//integral component of membrane;	-	-
CCM_07277	6.26517	24.4731	1.96577	0.0154478	0.153172	NW_006271973.1	GO:0051598;GO:0004674;GO:0006468;GO:0090006;GO:0005524;GO:0007131;GO:0030998;GO:0005829	-	opiNOG17498;sordNOG09818	T	sp|Q10292|MEK1_SCHPO Meiosis-specific serine/threonine-protein kinase mek1 OS=Schizosaccharomyces pombe (strain 972 / ATCC 24843) GN=mek1 PE=3 SV=1	serine/threonine protein kinase, putative	18169288	GO:0051598//meiotic recombination checkpoint signaling;GO:0006468//protein phosphorylation;GO:0090006//regulation of linear element assembly;GO:0007131//reciprocal meiotic recombination;	GO:0030998//linear element;GO:0005829//cytosol;	GO:0004674//protein serine/threonine kinase activity;GO:0005524//ATP binding;	-
CCM_06991	42.5002	89.052	1.06718	0.0159727	0.157081	NW_006271973.1	-	-	-	-	-	hypothetical protein	18169002	-	-	-	-
CCM_01631	22.2734	52.9565	1.24948	0.0160104	0.157291	NW_006271969.1	-	-	sordNOG10855	S	-	hypothetical protein	18163661	-	-	-	-
CCM_02862	94.9818	201.844	1.08751	0.0163097	0.159418	NW_006271970.1	GO:0006836;GO:0016021;GO:0005328;GO:0055085	K05034	opiNOG00915;sordNOG10913	P	sp|Q7K4Y6|DAT_DROME Sodium-dependent dopamine transporter OS=Drosophila melanogaster GN=DAT PE=1 SV=1	sodium/chloride dependent neurotransmitter transporter, putative	18164889	GO:0006836//neurotransmitter transport;GO:0055085//transmembrane transport;	GO:0016021//integral component of membrane;	GO:0005328//neurotransmitter:sodium symporter activity;	ko04727(GABAergic synapse);ko04721(Synaptic vesicle cycle)
CCM_08345	0.317678	8.15417	4.6819	0.016396	0.159773	NW_006271975.1	-	-	opiNOG01617;hypNOG04234;sordNOG11440;opiNOG17312;COG0666	SMR	sp|Q00808|HETE1_PODAS Vegetative incompatibility protein HET-E-1 OS=Podospora anserina GN=HET-E1 PE=4 SV=1	NACHT and ankyrin domain protein	18170353	-	-	-	-
CCM_02059	4464.93	9812.5	1.13598	0.0166147	0.161252	NW_006271970.1	GO:0016021	-	pleNOG08552;sorNOG08110;pleNOG06351	S	sp|B8NM67|USTYA_ASPFN Oxidase ustYa OS=Aspergillus flavus (strain ATCC 200026 / FGSC A1120 / NRRL 3357 / JCM 12722 / SRRC 167) GN=ustYa PE=1 SV=1	hypothetical protein	18164088	-	GO:0016021//integral component of membrane;	-	-
CCM_09256	15.2351	41.2917	1.43846	0.0167087	0.161512	NW_006271976.1	-	-	-	-	-	hypothetical protein	18171259	-	-	-	-
CCM_00152	161.455	354.568	1.13493	0.016951	0.162896	NW_006271969.1	GO:0008080	-	NOG29681	R	sp|P13018|STA_ECOLX Streptothricin acetyltransferase OS=Escherichia coli GN=sat-1 PE=4 SV=1	streptothricin-acetyltransferase	18162187	-	-	GO:0008080//N-acetyltransferase activity;	-
CCM_07149	116.998	348.407	1.57429	0.0171164	0.163644	NW_006271973.1	GO:0006284;GO:0003824	K10773	sordNOG10957;opiNOG24494	L	sp|F4JCQ3|DG783_ARATH Putative DNA glycosylase At3g47830 OS=Arabidopsis thaliana GN=At3g47830 PE=3 SV=1	HhH-GPD family base excision DNA repair protein	18169160	GO:0006284//base-excision repair;	-	GO:0003824//catalytic activity;	ko03410(Base excision repair)
CCM_09376	819.527	2482.61	1.59899	0.0172693	0.164289	NW_006271977.1	GO:0043531	-	opiNOG48617;sordNOG13490;opiNOG23383	SR	-	Tetratricopeptide-like helical	18171379	-	-	GO:0043531//ADP binding;	-
CCM_00673	79.227	173.818	1.13352	0.0173469	0.164377	NW_006271969.1	GO:0008080	-	NOG65997	R	sp|P96579|YDAF_BACSU Putative ribosomal N-acetyltransferase YdaF OS=Bacillus subtilis (strain 168) GN=ydaF PE=1 SV=1	acetyltransferase	18162707	-	-	GO:0008080//N-acetyltransferase activity;	-
CCM_03902	217.38	1428.82	2.71653	0.0176032	0.166151	NW_006271971.1	GO:0016021	-	opiNOG18273;sordNOG08148;sordNOG09404	S	sp|P35735|SFK1_YEAST Protein SFK1 OS=Saccharomyces cerevisiae (strain ATCC 204508 / S288c) GN=SFK1 PE=1 SV=1	FK506 suppressor Sfk1	18165925	-	GO:0016021//integral component of membrane;	-	-
CCM_00413	29.7642	82.1408	1.46452	0.017615	0.166151	NW_006271969.1	GO:0016021;GO:0016491;GO:0055114;GO:0006633;GO:0005506	-	eurotNOG03053;opiNOG24129	S	sp|A0A024FA41|VLMA_LECSP Fatty acid hydroxylase vlmA OS=Lecanicillium sp. GN=vlmA PE=3 SV=1	Fatty acid hydroxylase	18162448	GO:0055114//obsolete oxidation-reduction process;GO:0006633//fatty acid biosynthetic process;	GO:0016021//integral component of membrane;	GO:0016491//oxidoreductase activity;GO:0005506//iron ion binding;	-
CCM_04074	391.405	863.803	1.14204	0.0177134	0.1667	NW_006271971.1	GO:0016491;GO:0055114	K22745	sordNOG07185	C	sp|B4F6I3|AIFM2_XENTR Apoptosis-inducing factor 2 OS=Xenopus tropicalis GN=aifm2 PE=2 SV=1	apoptosis-inducing factor, putative	18166097	GO:0055114//obsolete oxidation-reduction process;	-	GO:0016491//oxidoreductase activity;	ko04115(p53 signaling pathway)
CCM_07225	1411.33	3280.1	1.21669	0.01774	0.166781	NW_006271973.1	-	-	opiNOG21337	R	sp|D4ALG0|LYSM1_ARTBC LysM domain-containing protein ARB_05157 OS=Arthroderma benhamiae (strain ATCC MYA-4681 / CBS 112371) GN=ARB_05157 PE=1 SV=1	LysM domain protein	18169236	-	-	-	-
CCM_00571	12.2451	36.0648	1.55839	0.018047	0.169342	NW_006271969.1	-	-	-	-	-	hypothetical protein	18162606	-	-	-	-
CCM_04851	41.289	84.2795	1.02942	0.0183151	0.170363	NW_006271971.1	-	-	-	-	-	hypothetical protein	18166872	-	-	-	-
CCM_06169	332.446	716.607	1.10806	0.0186131	0.172467	NW_006271972.1	GO:0005783	-	KOG0714;sorNOG02986;sordNOG09181	O	sp|Q9Y7T9|YCJD_SCHPO Uncharacterized J domain-containing protein C63.13 OS=Schizosaccharomyces pombe (strain 972 / ATCC 24843) GN=SPCC63.13 PE=3 SV=1	DnaJ chaperone (Caj1)	18168184	-	GO:0005783//endoplasmic reticulum;	-	-
CCM_06913	1218.08	2705.17	1.15111	0.0187882	0.173113	NW_006271973.1	GO:0048038;GO:0055114;GO:0008131;GO:0009308;GO:0005507	-	sordNOG11166	R	sp|Q9VCC0|CHRD1_DROME Cysteine and histidine-rich domain-containing protein OS=Drosophila melanogaster GN=CHORD PE=1 SV=1	CORD and CS domain protein	18168924	GO:0055114//obsolete oxidation-reduction process;GO:0009308//amine metabolic process;	-	GO:0048038//quinone binding;GO:0008131//primary amine oxidase activity;GO:0005507//copper ion binding;	-
CCM_00989	533.999	1190.81	1.15704	0.0188221	0.173236	NW_006271969.1	-	-	-	-	-	hypothetical protein	18163022	-	-	-	-
CCM_03255	384.027	915.07	1.25267	0.0191021	0.174477	NW_006271970.1	GO:0008152;GO:0031177;GO:0003824	-	opiNOG05776;COG1020;opiNOG24230;sordNOG06979	IQ	sp|E9FCP4|DTXS1_METRA Nonribosomal peptide synthetase dtxS1 OS=Metarhizium robertsii (strain ARSEF 23 / ATCC MYA-3075) GN=dtxS1 PE=1 SV=2	non-ribosomal peptide synthase, putative	18165281	GO:0008152//metabolic process;	-	GO:0031177//phosphopantetheine binding;GO:0003824//catalytic activity;	-
CCM_04819	14.0663	38.7405	1.4616	0.0192283	0.17515	NW_006271971.1	GO:0016021	-	-	-	-	hypothetical protein	18166840	-	GO:0016021//integral component of membrane;	-	-
CCM_03596	297.678	669.379	1.16907	0.0194844	0.176129	NW_006271970.1	GO:0008237;GO:0006508	-	euNOG02355;sorNOG03848;opiNOG11422;opiNOG10620	WO	sp|A4RGT4|MEP1_MAGO7 Extracellular metalloprotease MGG_08041 OS=Magnaporthe oryzae (strain 70-15 / ATCC MYA-4617 / FGSC 8958) GN=MGG_08041 PE=3 SV=1	metalloprotease 1	18165622	GO:0006508//proteolysis;	-	GO:0008237//metallopeptidase activity;	-
CCM_02734	1835.64	3688.86	1.00689	0.0195088	0.176184	NW_006271970.1	GO:0046685;GO:0043224;GO:0046686;GO:0043130;GO:0000209;GO:0031146;GO:0030174;GO:0042802;GO:0000083	K10259	opiNOG02953;sordNOG12155	KR	sp|Q01277|SCONB_NEUCR Probable E3 ubiquitin ligase complex SCF subunit scon-2 OS=Neurospora crassa (strain ATCC 24698 / 74-OR23-1A / CBS 708.71 / DSM 1257 / FGSC 987) GN=scon-2 PE=1 SV=1	sulfur controller-2	18164761	GO:0046685//response to arsenic-containing substance;GO:0046686//response to cadmium ion;GO:0000209//protein polyubiquitination;GO:0031146//SCF-dependent proteasomal ubiquitin-dependent protein catabolic process;GO:0030174//regulation of DNA-dependent DNA replication initiation;GO:0000083//regulation of transcription involved in G1/S transition of mitotic cell cycle;	GO:0043224//nuclear SCF ubiquitin ligase complex;	GO:0043130//ubiquitin binding;GO:0042802//identical protein binding;	ko04120(Ubiquitin mediated proteolysis);ko04111(Cell cycle - yeast)
CCM_05068	1.33866	11.3008	3.07757	0.0196969	0.177193	NW_006271972.1	-	-	sorNOG08077;opiNOG41235	LS	-	hypothetical protein	18167088	-	-	-	-
CCM_09018	41.1898	234.367	2.50841	0.0203556	0.181278	NW_006271975.1	-	-	onyNOG08362;opiNOG54184	S	-	hypothetical protein	18171022	-	-	-	-
CCM_00339	17.6232	68.2465	1.95328	0.0203986	0.181325	NW_006271969.1	-	-	-	-	-	hypothetical protein	18162374	-	-	-	-
CCM_07210	255.039	606.642	1.25013	0.0206715	0.183015	NW_006271973.1	GO:0008270	K24684	opiNOG21386;sordNOG04306	R	-	zinc finger protein	18169221	-	-	GO:0008270//zinc ion binding;	-
CCM_09609	27.7577	60.8437	1.13222	0.0210792	0.184982	NW_006271978.1	-	-	-	-	-	hypothetical protein	18171611	-	-	-	-
CCM_00852	12.1965	34.0992	1.48327	0.0211041	0.185031	NW_006271969.1	GO:0016020;GO:0003885;GO:0055114;GO:0050660	K00103	opiNOG20479;sordNOG11168;sorNOG06846	V	sp|O81030|GGLO5_ARATH L-gulonolactone oxidase 5 OS=Arabidopsis thaliana GN=GULLO5 PE=1 SV=1	FAD/FMN-containing dehydrogenase	18162886	GO:0055114//obsolete oxidation-reduction process;	GO:0016020//membrane;	GO:0003885//D-arabinono-1,4-lactone oxidase activity;GO:0050660//flavin adenine dinucleotide binding;	ko00053(Ascorbate and aldarate metabolism)
CCM_04701	284.871	610.421	1.09949	0.0222903	0.191926	NW_006271971.1	GO:0016021	K21989	sordNOG09861;opiNOG18887	S	sp|Q03516|RSN1_YEAST Uncharacterized protein RSN1 OS=Saccharomyces cerevisiae (strain ATCC 204508 / S288c) GN=RSN1 PE=1 SV=1	DUF221 domain protein	18166723	-	GO:0016021//integral component of membrane;	-	-
CCM_03982	22.6594	52.7142	1.21808	0.0226125	0.194012	NW_006271971.1	GO:0055114;GO:0016491;GO:0005840	K00059	sordNOG08776;opiNOG19571;sorNOG06672	Q	sp|Q00791|STCU_EMENI Versicolorin reductase OS=Emericella nidulans (strain FGSC A4 / ATCC 38163 / CBS 112.46 / NRRL 194 / M139) GN=stcU PE=3 SV=2	60S ribosomal protein L40	18166005	GO:0055114//obsolete oxidation-reduction process;	GO:0005840//ribosome;	GO:0016491//oxidoreductase activity;	ko00780(Biotin metabolism);ko00333(Prodigiosin biosynthesis);ko00061(Fatty acid biosynthesis)
CCM_08391	182.565	393.669	1.10857	0.0231474	0.196845	NW_006271975.1	GO:0006351;GO:0043934;GO:0048856;GO:0030154	-	opiNOG42358;sordNOG15139	S	sp|J5JPY5|WETA_BEAB2 Developmental regulatory protein wetA OS=Beauveria bassiana (strain ARSEF 2860) GN=wetA PE=2 SV=1	hypothetical protein	18170399	GO:0006351//transcription, DNA-templated;GO:0043934//sporulation;GO:0048856//anatomical structure development;GO:0030154//cell differentiation;	-	-	-
CCM_04310	47.6839	246.36	2.3692	0.0233995	0.197853	NW_006271971.1	GO:0043039;GO:0005524;GO:0004812	-	opiNOG19092;COG2872;sorNOG04830	R	sp|O57734|ALAXL_PYRHO Alanyl-tRNA editing protein AlaX-L OS=Pyrococcus horikoshii (strain ATCC 700860 / DSM 12428 / JCM 9974 / NBRC 100139 / OT-3) GN=alaXL PE=3 SV=1	alanyl-tRNA synthetase	18166333	GO:0043039//tRNA aminoacylation;	-	GO:0005524//ATP binding;GO:0004812//aminoacyl-tRNA ligase activity;	-
CCM_02963	891.187	1886.42	1.08185	0.0235029	0.197853	NW_006271970.1	-	-	sordNOG14239;opiNOG47022;magNOG13091	S	sp|O74989|YJZC_SCHPO Uncharacterized protein C338.12 OS=Schizosaccharomyces pombe (strain 972 / ATCC 24843) GN=SPCC338.12 PE=3 SV=1	Proteinase inhibitor, propeptide	18164990	-	-	-	-
CCM_03608	22.204	65.917	1.56983	0.0235329	0.197853	NW_006271970.1	-	-	opiNOG28140;sorNOG07890	R	sp|Q8G9F9|INHA_PSEPU Isonitrile hydratase OS=Pseudomonas putida GN=inhA PE=1 SV=1	ThiJ/PfpI	18165634	-	-	-	-
CCM_07702	212.11	1737.6	3.03421	0.0239169	0.199508	NW_006271974.1	GO:0016042;GO:0003847	K01062	sordNOG04427;sorNOG02748;opiNOG21371	I	sp|Q90678|PAFA_CHICK Platelet-activating factor acetylhydrolase OS=Gallus gallus GN=PLA2G7 PE=2 SV=1	phospholipase A2, group VII	18169712	GO:0016042//lipid catabolic process;	-	GO:0003847//1-alkyl-2-acetylglycerophosphocholine esterase activity;	ko00565(Ether lipid metabolism)
CCM_07117	31.1097	66.922	1.10511	0.0244257	0.201956	NW_006271973.1	-	-	sorNOG01209;opiNOG05078	SR	-	hypothetical protein	18169128	-	-	-	-
CCM_08175	13.1491	36.4012	1.46902	0.0245585	0.202495	NW_006271974.1	-	-	-	-	-	hypothetical protein	18170184	-	-	-	-
CCM_08070	26.5465	58.0638	1.12912	0.0248059	0.203743	NW_006271974.1	-	K01192	sordNOG14130;opiNOG60661	S	-	hypothetical protein	18170079	-	-	-	ko04142(Lysosome);ko00511(Other glycan degradation)
CCM_03444	59.2685	176.724	1.57616	0.0257134	0.209487	NW_006271970.1	GO:0055085;GO:0016021	-	opiNOG00807	R	sp|A0A0B5EMG9|FUB11_FUSOX Efflux pump FUBT OS=Fusarium oxysporum GN=FUBT PE=1 SV=1	MFS multidrug transporter	18165470	GO:0055085//transmembrane transport;	GO:0016021//integral component of membrane;	-	-
CCM_04817	15.9384	40.1099	1.33145	0.0257246	0.209487	NW_006271971.1	GO:0005975;GO:0004568;GO:0008061;GO:0006032	K01183	COG3325;opiNOG23523;sordNOG10226	G	sp|P09805|KTXA_KLULA Killer toxin subunits alpha/beta OS=Kluyveromyces lactis (strain ATCC 8585 / CBS 2359 / DSM 70799 / NBRC 1267 / NRRL Y-1140 / WM37) PE=1 SV=1	class V chitinase Chi100	18166838	GO:0005975//carbohydrate metabolic process;GO:0006032//chitin catabolic process;	-	GO:0004568//chitinase activity;GO:0008061//chitin binding;	ko00520(Amino sugar and nucleotide sugar metabolism)
CCM_01457	360.642	1807.69	2.32551	0.0259032	0.209712	NW_006271969.1	-	-	sorNOG04957;sordNOG13280;opiNOG36609	S	-	hypothetical protein	18163488	-	-	-	-
CCM_02865	224.307	1103.24	2.2982	0.0264127	0.212921	NW_006271970.1	GO:0055085;GO:0016021	-	opiNOG19443;sordNOG08944	R	sp|Q2U5H8|KOJT_ASPOR Probable efflux pump kojT OS=Aspergillus oryzae (strain ATCC 42149 / RIB 40) GN=kojT PE=1 SV=1	MFS multidrug transporter, putative	18164892	GO:0055085//transmembrane transport;	GO:0016021//integral component of membrane;	-	-
CCM_00908	1179.7	4186.41	1.8273	0.0268543	0.214344	NW_006271969.1	-	-	sordNOG12450;magNOG12254	S	-	period circadian protein, putative	18162942	-	-	-	-
CCM_06868	21.5161	50.0001	1.21652	0.0269265	0.214565	NW_006271973.1	GO:0015171;GO:0016021;GO:0003333	K16261	opiNOG05794	E	sp|P18696|PUTX_EMENI Proline-specific permease OS=Emericella nidulans (strain FGSC A4 / ATCC 38163 / CBS 112.46 / NRRL 194 / M139) GN=prnB PE=2 SV=2	glycogen branching enzyme GbeA, putative	18168879	GO:0003333//amino acid transmembrane transport;	GO:0016021//integral component of membrane;	GO:0015171//amino acid transmembrane transporter activity;	-
CCM_02708	10.1873	30.6533	1.58927	0.0271645	0.215605	NW_006271970.1	-	-	-	-	-	hypothetical protein	18164735	-	-	-	-
CCM_06481	99.222	305.953	1.62458	0.0276084	0.217321	NW_006271973.1	-	-	-	-	-	hypothetical protein	18168495	-	-	-	-
CCM_02585	3160.11	12495.2	1.98333	0.027622	0.217321	NW_006271970.1	GO:0008289	-	opiNOG10888	S	sp|Q10327|YD72_SCHPO Uncharacterized protein C32A11.02c OS=Schizosaccharomyces pombe (strain 972 / ATCC 24843) GN=SPAC32A11.02c PE=4 SV=1	hypothetical protein	18164612	-	-	GO:0008289//lipid binding;	-
CCM_08842	2920.24	6970.91	1.25526	0.0277466	0.217675	NW_006271975.1	GO:0005975;GO:0004568;GO:0006032	-	opiNOG14280;sordNOG09717	GR	sp|Q9WTV1|CH3L1_RAT Chitinase-3-like protein 1 OS=Rattus norvegicus GN=Chi3l1 PE=2 SV=3	bacteriodes thetaiotaomicron symbiotic chitinase, putative	18170847	GO:0005975//carbohydrate metabolic process;GO:0006032//chitin catabolic process;	-	GO:0004568//chitinase activity;	-
CCM_02058	3256.31	6898.52	1.08305	0.027874	0.217784	NW_006271970.1	GO:0046872;GO:0055114;GO:0016491;GO:0016021	K00505	opiNOG12374;opiNOG28993	R	sp|B8NM74|USTQ_ASPFN Tyrosinase ustQ OS=Aspergillus flavus (strain ATCC 200026 / FGSC A1120 / NRRL 3357 / JCM 12722 / SRRC 167) GN=ustQ PE=1 SV=1	tyrosinase, putative	18164087	GO:0055114//obsolete oxidation-reduction process;	GO:0016021//integral component of membrane;	GO:0046872//metal ion binding;GO:0016491//oxidoreductase activity;	ko04916(Melanogenesis);ko00965(Betalain biosynthesis);ko00950(Isoquinoline alkaloid biosynthesis);ko00350(Tyrosine metabolism)
CCM_08401	17.4218	42.5175	1.28717	0.0280677	0.218587	NW_006271975.1	-	-	-	-	-	hypothetical protein	18170409	-	-	-	-
CCM_08103	4137.72	13071.3	1.6595	0.0283395	0.219914	NW_006271974.1	GO:0055114;GO:0004497	-	opiNOG23698	Q	sp|Q9I3H5|BVMO_PSEAE Baeyer-Villiger monooxygenase OS=Pseudomonas aeruginosa (strain ATCC 15692 / DSM 22644 / CIP 104116 / JCM 14847 / LMG 12228 / 1C / PRS 101 / PAO1) GN=PA1538 PE=1 SV=1	flavin-binding monooxygenase-like protein	18170112	GO:0055114//obsolete oxidation-reduction process;	-	GO:0004497//monooxygenase activity;	-
CCM_06791	7.9381	25.4724	1.68207	0.0283524	0.219914	NW_006271973.1	GO:0004190;GO:0006508	-	opiNOG14629;sordNOG08783	O	sp|Q4WFS2|Y1220_ASPFU Probable aspartic-type endopeptidase AFUA_3G01220 OS=Neosartorya fumigata (strain ATCC MYA-4609 / Af293 / CBS 101355 / FGSC A1100) GN=AFUA_3G01220 PE=3 SV=2	aspartic-type endopeptidase, putative	18168802	GO:0006508//proteolysis;	-	GO:0004190//aspartic-type endopeptidase activity;	-
CCM_05286	23.7896	53.4785	1.16863	0.0287752	0.221942	NW_006271972.1	-	-	opiNOG25720;opiNOG37063	R	-	ferulic acid esterase (FaeA), putative	18167305	-	-	-	-
CCM_00167	27.2166	57.9674	1.09076	0.0291058	0.223952	NW_006271969.1	GO:0016021	K07297	opiNOG52383;COG1272;opiNOG52455	RT	sp|Q753H5|IZH1_ASHGO ADIPOR-like receptor IZH1 OS=Ashbya gossypii (strain ATCC 10895 / CBS 109.51 / FGSC 9923 / NRRL Y-1056) GN=IZH1 PE=3 SV=1	hemolysin-III channel protein Izh2	18162202	-	GO:0016021//integral component of membrane;	-	ko04936(Alcoholic liver disease);ko04932(Non-alcoholic fatty liver disease);ko04920(Adipocytokine signaling pathway);ko04211(Longevity regulating pathway);ko04152(AMPK signaling pathway)
CCM_04839	6.47284	24.58	1.92501	0.0295161	0.225127	NW_006271971.1	GO:0065007	-	euNOG27048;sordNOG10574	TS	-	hypothetical protein	18166860	GO:0065007//biological regulation;	-	-	-
CCM_05301	71.9256	247.136	1.78073	0.0300268	0.228138	NW_006271972.1	GO:0000981;GO:0005634;GO:0008270;GO:0003677;GO:0006357	-	opiNOG16598;sordNOG09251;sorNOG02651	S	sp|P28349|NIT4_NEUCR Nitrogen assimilation transcription factor nit-4 OS=Neurospora crassa (strain ATCC 24698 / 74-OR23-1A / CBS 708.71 / DSM 1257 / FGSC 987) GN=nit-4 PE=4 SV=2	pathway-specific nitrogen regulator	18167319	GO:0006357//regulation of transcription by RNA polymerase II;	GO:0005634//nucleus;	GO:0000981//DNA-binding transcription factor activity, RNA polymerase II-specific;GO:0008270//zinc ion binding;GO:0003677//DNA binding;	-
CCM_06505	8.49666	25.8481	1.60509	0.0300294	0.228138	NW_006271973.1	-	-	-	-	-	hypothetical protein	18168519	-	-	-	-
CCM_01591	9.59597	30.2803	1.65788	0.0305134	0.230722	NW_006271969.1	GO:0004672;GO:0006468	-	opiNOG32515;NOG130450;sordNOG07717	R	-	Protein kinase-like domain	18163622	GO:0006468//protein phosphorylation;	-	GO:0004672//protein kinase activity;	-
CCM_02444	203.051	487.308	1.26299	0.0313998	0.235669	NW_006271970.1	GO:0016301;GO:0016310	-	sordNOG09645;hypNOG13366;opiNOG51239	S	-	serine/threonine-protein kinase Sgk2	18164471	GO:0016310//phosphorylation;	-	GO:0016301//kinase activity;	-
CCM_08615	0	6.82076	Inf	0.0318924	0.238338	NW_006271975.1	-	-	-	-	-	hypothetical protein	18170621	-	-	-	-
CCM_01264	25.9952	56.107	1.10993	0.0336981	0.24565	NW_006271969.1	GO:0016021;GO:0055085	-	sorNOG03298;opiNOG17879;sordNOG11322	G	sp|Q5ATG7|APDF_EMENI Aspyridones efflux protein apdF OS=Emericella nidulans (strain FGSC A4 / ATCC 38163 / CBS 112.46 / NRRL 194 / M139) GN=apdF PE=2 SV=1	MFS monocarboxylate transporter, putative	18163295	GO:0055085//transmembrane transport;	GO:0016021//integral component of membrane;	-	-
CCM_06764	44.8789	117.673	1.39067	0.0339928	0.246501	NW_006271973.1	GO:0003676;GO:0000166	-	opiNOG21822	R	sp|Q2L4W6|SPO5_SCHPO Sporulation-specific protein 5 OS=Schizosaccharomyces pombe (strain 972 / ATCC 24843) GN=spo5 PE=1 SV=1	RNA binding protein MSSP-2	18168777	-	-	GO:0003676//nucleic acid binding;GO:0000166//nucleotide binding;	-
CCM_01944	8.35038	24.6735	1.56305	0.0340303	0.246501	NW_006271970.1	GO:0016021;GO:0004497;GO:0055114;GO:0016705;GO:0020037;GO:0005506	-	opiNOG55648;COG2124;opiNOG57135	Q	sp|Q9C449|PAXP_PENPX Cytochrome P450 monooxygenase paxP OS=Penicillium paxilli GN=paxP PE=1 SV=1	cytochrome P450, putative	18163973	GO:0055114//obsolete oxidation-reduction process;	GO:0016021//integral component of membrane;	GO:0004497//monooxygenase activity;GO:0016705//oxidoreductase activity, acting on paired donors, with incorporation or reduction of molecular oxygen;GO:0020037//heme binding;GO:0005506//iron ion binding;	-
CCM_00907	263.867	2687.26	3.34825	0.0340965	0.246571	NW_006271969.1	GO:0016021	-	sordNOG13016;sordNOG13248	S	-	integral membrane protein	18162941	-	GO:0016021//integral component of membrane;	-	-
CCM_07870	228.092	588.124	1.36651	0.0341759	0.246775	NW_006271974.1	-	-	sordNOG09317	R	-	hypothetical protein	18169880	-	-	-	-
CCM_02348	2576.54	5175.03	1.00613	0.0345948	0.248866	NW_006271970.1	GO:0016021	-	sordNOG11419;opiNOG01140;opiNOG77198	R	sp|Q9UT00|YKH3_SCHPO Uncharacterized protein PYUK71.03c OS=Schizosaccharomyces pombe (strain 972 / ATCC 24843) GN=SPAPYUK71.03c PE=1 SV=1	membrane bound C2 domain-containing protein	18164375	-	GO:0016021//integral component of membrane;	-	-
CCM_00986	666.206	1809.48	1.44154	0.0350521	0.251216	NW_006271969.1	GO:0008152;GO:0008484	-	sordNOG08623	R	sp|O69787|BETC_RHIME Choline-sulfatase OS=Rhizobium meliloti (strain 1021) GN=betC PE=1 SV=2	sulfatase	18163019	GO:0008152//metabolic process;	-	GO:0008484//sulfuric ester hydrolase activity;	-
CCM_06912	92.3893	188.12	1.02585	0.0351535	0.251567	NW_006271973.1	GO:0005507;GO:0009308;GO:0048038;GO:0008131;GO:0055114	K00276	sordNOG11922;opiNOG14092	Q	sp|Q12556|AMO1_ASPNG Copper amine oxidase 1 OS=Aspergillus niger GN=AO-I PE=1 SV=2	copper amine oxidase	18168923	GO:0009308//amine metabolic process;GO:0055114//obsolete oxidation-reduction process;	-	GO:0005507//copper ion binding;GO:0048038//quinone binding;GO:0008131//primary amine oxidase activity;	ko00960(Tropane, piperidine and pyridine alkaloid biosynthesis);ko00950(Isoquinoline alkaloid biosynthesis);ko00410(beta-Alanine metabolism);ko00360(Phenylalanine metabolism);ko00350(Tyrosine metabolism);ko00260(Glycine, serine and threonine metabolism)
CCM_09650	3.27869	14.6209	2.15683	0.0373053	0.261429	NW_006271978.1	-	-	-	-	-	hypothetical protein	18171652	-	-	-	-
CCM_03766	1.94004	11.5798	2.57745	0.0375538	0.261924	NW_006271971.1	-	-	-	-	-	hypothetical protein	18165789	-	-	-	-
CCM_02674	0.686698	92.0371	7.0664	0.0378686	0.263355	NW_006271970.1	GO:0055114;GO:0016491	-	sordNOG11171;sorNOG02601;opiNOG20662	Q	sp|Q9RPT1|RHLG_PSEAE Rhamnolipids biosynthesis 3-oxoacyl-[acyl-carrier-protein] reductase OS=Pseudomonas aeruginosa (strain ATCC 15692 / DSM 22644 / CIP 104116 / JCM 14847 / LMG 12228 / 1C / PRS 101 / PAO1) GN=rhlG PE=1 SV=1	short chain dehydrogenase/reductase family	18164701	GO:0055114//obsolete oxidation-reduction process;	-	GO:0016491//oxidoreductase activity;	-
CCM_06175	191.407	424.022	1.1475	0.0384468	0.265839	NW_006271972.1	-	-	hypNOG01815;sordNOG12920	S	-	hypothetical protein	18168190	-	-	-	-
CCM_05086	4.1109	16.6598	2.01884	0.0385132	0.266106	NW_006271972.1	GO:0005576	-	pleNOG08652;opiNOG34962;sordNOG12599	S	sp|P47032|PRY1_YEAST Protein PRY1 OS=Saccharomyces cerevisiae (strain ATCC 204508 / S288c) GN=PRY1 PE=1 SV=1	extracellular SCP domain protein Pry1, putative	18167106	-	GO:0005576//extracellular region;	-	-
CCM_01685	18.0231	44.4113	1.30108	0.0390133	0.268213	NW_006271969.1	GO:0016021	-	eurotNOG07137;opiNOG56571	S	-	hypothetical protein	18163715	-	GO:0016021//integral component of membrane;	-	-
CCM_09285	95.7443	465.272	2.28082	0.0401626	0.272151	NW_006271976.1	-	-	-	-	-	hypothetical protein	18171288	-	-	-	-
CCM_09153	172.266	382.639	1.15134	0.040853	0.275096	NW_006271976.1	GO:0046952;GO:0008260;GO:0005739	K01027	opiNOG02295;sordNOG11405	C	sp|Q9W058|SCOT_DROME Succinyl-CoA:3-ketoacid-coenzyme A transferase, mitochondrial OS=Drosophila melanogaster GN=SCOT PE=1 SV=1	coenzyme A transferase, putative	18171156	GO:0046952//ketone body catabolic process;	GO:0005739//mitochondrion;	GO:0008260//3-oxoacid CoA-transferase activity;	ko00650(Butanoate metabolism);ko00280(Valine, leucine and isoleucine degradation)
CCM_07782	368.558	1362.2	1.88598	0.0412868	0.277496	NW_006271974.1	GO:0016021;GO:0004553;GO:0005975	-	sordNOG09183;opiNOG01397;pleNOG00625	S	sp|Q8N0N3|BGBP_PENMO Beta-1,3-glucan-binding protein OS=Penaeus monodon PE=2 SV=1	secreted glucosidase, putative	18169792	GO:0005975//carbohydrate metabolic process;	GO:0016021//integral component of membrane;	GO:0004553//hydrolase activity, hydrolyzing O-glycosyl compounds;	-
CCM_03169	0	5.12162	Inf	0.0414513	0.278407	NW_006271970.1	GO:0006508;GO:0004252	-	sordNOG05989;opiNOG22565;opiNOG19296	O	sp|Q00208|ORYZ_EMENI Alkaline protease 1 OS=Emericella nidulans (strain FGSC A4 / ATCC 38163 / CBS 112.46 / NRRL 194 / M139) GN=alp1 PE=2 SV=1	alkaline serine protease Alp1	18165196	GO:0006508//proteolysis;	-	GO:0004252//serine-type endopeptidase activity;	-
CCM_07565	5.44956	19.0286	1.80396	0.0414923	0.278488	NW_006271974.1	GO:0016021	-	sordNOG13260;sorNOG07726;opiNOG43582;opiNOG36082	S	-	F-box domain-containing protein	18169576	-	GO:0016021//integral component of membrane;	-	-
CCM_09082	25.5579	52.8291	1.04756	0.0416202	0.279151	NW_006271975.1	GO:0016491;GO:0008270;GO:0055114	-	sordNOG04386	Q	sp|Q9P6I8|YHG1_SCHPO Zinc-type alcohol dehydrogenase-like protein C1198.01 OS=Schizosaccharomyces pombe (strain 972 / ATCC 24843) GN=SPBC1198.01 PE=3 SV=1	S-(hydroxymethyl)glutathione dehydrogenase	18171085	GO:0055114//obsolete oxidation-reduction process;	-	GO:0016491//oxidoreductase activity;GO:0008270//zinc ion binding;	-
CCM_04852	47.6545	106.637	1.16202	0.0417635	0.279917	NW_006271971.1	-	-	-	-	-	hypothetical protein	18166873	-	-	-	-
CCM_05734	380.247	2783.92	2.87211	0.042241	0.282382	NW_006271972.1	GO:0008152;GO:0016787	-	opiNOG07824;COG2513	GC	sp|Q0QLE4|DML_EUBBA 2,3-dimethylmalate lyase OS=Eubacterium barkeri GN=Dml PE=1 SV=1	carboxyphosphonoenolpyruvate phosphonomutase, putative	18167752	GO:0008152//metabolic process;	-	GO:0016787//hydrolase activity;	-
CCM_03737	19.7049	44.6146	1.17896	0.0422531	0.282382	NW_006271971.1	-	-	-	-	-	hypothetical protein	18165760	-	-	-	-
CCM_04850	6.25631	20.591	1.71863	0.0426057	0.283586	NW_006271971.1	GO:0016021	-	-	-	-	hypothetical protein	18166871	-	GO:0016021//integral component of membrane;	-	-
CCM_03465	8.10329	24.5285	1.59788	0.0428151	0.284586	NW_006271970.1	-	-	-	-	-	hypothetical protein	18165491	-	-	-	-
CCM_06508	18.6852	41.4553	1.14966	0.0446984	0.292654	NW_006271973.1	-	-	opiNOG08204;opiNOG42592;opiNOG59069	R	-	muramidase, putative	18168522	-	-	-	-
CCM_00682	19.251	42.3906	1.13881	0.0452043	0.294363	NW_006271969.1	-	-	-	-	-	hypothetical protein	18162716	-	-	-	-
CCM_05695	1.20123	9.87983	3.03997	0.0456253	0.296102	NW_006271972.1	-	-	sordNOG05309;NOG117477	S	-	hypothetical protein	18167713	-	-	-	-
CCM_01127	841.572	1739.39	1.04742	0.0464261	0.298801	NW_006271969.1	GO:0016021;GO:0005524	-	euNOG40947;opiNOG55626;COG1132;opiNOG50829	QSV	sp|A0A0U1LQE1|CCTS_TALIS ABC transporter cctS OS=Talaromyces islandicus GN=cctS PE=3 SV=1	ATP-binding cassette transporter, putative	18163159	-	GO:0016021//integral component of membrane;	GO:0005524//ATP binding;	-
CCM_04387	12.2305	30.3094	1.30929	0.0473247	0.302639	NW_006271971.1	-	-	-	-	-	hypothetical protein	18166410	-	-	-	-
CCM_08127	759.237	12058.2	3.98932	0.0498089	0.313522	NW_006271974.1	-	-	opiNOG45672	S	-	mismatched base pair and cruciform DNA recognition protein, putative	18170136	-	-	-	-
