# Supplementary material for: Genome resequencing and transcriptome analysis reveal the molecular mechanism of albinism in Cordyceps militaris
Source: Front Microbiol. 2023 Apr 11;14:1153153. doi: 10.3389/fmicb.2023.1153153 (PMC10126257; doi:10.3389/fmicb.2023.1153153)
Supplement: Supplementary file 11 [file Table_11.XLSX]

## Sheet: Sheet1
Table S11. Differentially expressed genes in the Alb compared with WTL. WTL, wild type after light treatment; Alb, albino mutation before light treatment.
Gene ID	BaseMean		log2FoldChange	pval	padj	Chromosome	GO	KEGG	eggNOG	eggNOG_Class	Swissprot	NR	Entrez_geneID	BP	CC	MF	Pathway
	WTL	Alb
CCM_09041	31052.3	59.1147	-9.03697	1.18546e-130	1.13958e-126	NW_006271975.1	GO:0008152;GO:0016874	-	sordNOG13532;sorNOG06812;opiNOG29960	I	sp|Q42982|4CL2_ORYSJ Probable 4-coumarate--CoA ligase 2 OS=Oryza sativa subsp. japonica GN=4CL2 PE=2 SV=2	AMP dependent CoA ligase, putative	18171045	GO:0008152//metabolic process;	-	GO:0016874//ligase activity;	-
CCM_09196	2478.74	2.09201	-10.2105	1.83598e-107	8.82464e-104	NW_006271976.1	-	-	opiNOG43873;sordNOG14513	S	-	hypothetical protein	18171199	-	-	-	-
CCM_04514	13006.8	184.145	-6.14228	3.37819e-79	1.08249e-75	NW_006271971.1	-	-	sordNOG15620;COG2202	ST	sp|Q01371|WC1_NEUCR White collar 1 protein OS=Neurospora crassa (strain ATCC 24698 / 74-OR23-1A / CBS 708.71 / DSM 1257 / FGSC 987) GN=wc-1 PE=1 SV=2	GATA transcription factor LreA	18166537	-	-	-	-
CCM_09040	3485.46	54.1856	-6.0073	2.22587e-71	5.34932e-68	NW_006271975.1	GO:0016021;GO:0055085	-	sorNOG06303;opiNOG13884	R	sp|Q2UPC1|ACLA_ASPOR MFS efflux transporter aclA OS=Aspergillus oryzae (strain ATCC 42149 / RIB 40) GN=aclA PE=3 SV=1	MFS multidrug transporter, putative	18171044	GO:0055085//transmembrane transport;	GO:0016021//integral component of membrane;	-	-
CCM_05702	4813.85	168.121	-4.83962	7.88404e-55	1.51578e-51	NW_006271972.1	-	K03098	sordNOG12717;opiNOG28862;sorNOG07779	RLM	-	Calycin-like protein	18167720	-	-	-	-
CCM_09194	336.299	0.319586	-10.0393	1.04395e-51	1.67258e-48	NW_006271976.1	GO:0003676	-	necNOG13927;pleNOG01151	S	-	hypothetical protein	18171197	-	-	GO:0003676//nucleic acid binding;	-
CCM_06056	31058.7	744.809	-5.38198	1.96624e-44	2.70021e-41	NW_006271972.1	GO:0035672;GO:0015421;GO:0016021;GO:0005737;GO:0051286;GO:1990847;GO:0032153;GO:0005524	K05658	sordNOG04851	Q	sp|P12866|STE6_YEAST Alpha-factor-transporting ATPase OS=Saccharomyces cerevisiae (strain ATCC 204508 / S288c) GN=STE6 PE=1 SV=1	a-Factor sex pheromone exporter	18168071	GO:0035672//oligopeptide transmembrane transport;GO:1990847//obsolete peptide pheromone transmembrane export involved in positive regulation of conjugation with cellular fusion;	GO:0016021//integral component of membrane;GO:0005737//cytoplasm;GO:0051286//cell tip;GO:0032153//cell division site;	GO:0015421//ABC-type oligopeptide transporter activity;GO:0005524//ATP binding;	ko05226(Gastric cancer);ko05206(MicroRNAs in cancer);ko04976(Bile secretion);ko02010(ABC transporters)
CCM_09195	276.052	0.319586	-9.75452	2.33202e-37	2.24178e-34	NW_006271976.1	-	-	-	-	-	hypothetical protein	18171198	-	-	-	-
CCM_03595	1268.48	95.5323	-3.73097	4.26054e-33	3.72332e-30	NW_006271970.1	GO:0015179;GO:0015807;GO:0005887;GO:0015297;GO:0003333	-	opiNOG01812;COG0531	E	sp|Q9ZU50|BAT1_ARATH Amino-acid permease BAT1 OS=Arabidopsis thaliana GN=BAT1 PE=2 SV=2	amino acid/polyamine transporter I	18165621	GO:0015807//L-amino acid transport;GO:0003333//amino acid transmembrane transport;	GO:0005887//integral component of plasma membrane;	GO:0015179//L-amino acid transmembrane transporter activity;GO:0015297//antiporter activity;	-
CCM_02531	18752.1	1696.69	-3.46626	1.28613e-31	9.51041e-29	NW_006271970.1	GO:0005634;GO:0008270;GO:0006351;GO:0003677	-	sordNOG06328	S	sp|D7UQ41|SOL4_ALTSO Probable transcription factor sol4 OS=Alternaria solani GN=sol4 PE=4 SV=1	Fungal specific transcription factor	18164558	GO:0006351//transcription, DNA-templated;	GO:0005634//nucleus;	GO:0008270//zinc ion binding;GO:0003677//DNA binding;	-
CCM_02806	545.213	20.8525	-4.70853	1.66097e-31	1.14049e-28	NW_006271970.1	GO:0016021;GO:0006950	-	opiNOG18168;hypNOG05026;necNOG11051	S	sp|C8ZI10|RSB1_YEAS8 Sphingoid long-chain base transporter RSB1 OS=Saccharomyces cerevisiae (strain Lalvin EC1118 / Prise de mousse) GN=RSB1 PE=3 SV=1	RTA1 like protein	18164833	GO:0006950//response to stress;	GO:0016021//integral component of membrane;	-	-
CCM_09042	48444.7	488.231	-6.63263	7.34195e-27	4.41113e-24	NW_006271975.1	GO:0031177;GO:0016740;GO:0008152	-	COG3321;opiNOG54134	QI	sp|Q5SBL6|FSDS_FUSHE Fusaridione A synthetase fsdS OS=Fusarium heterosporum GN=fsdS PE=3 SV=2	polyketide synthase, putative	18171046	GO:0008152//metabolic process;	-	GO:0031177//phosphopantetheine binding;GO:0016740//transferase activity;	-
CCM_09160	1199.15	164.507	-2.86579	6.71931e-22	3.22963e-19	NW_006271976.1	-	-	sordNOG15101;sordNOG15176	S	-	hypothetical protein	18171163	-	-	-	-
CCM_03576	5763.08	534.452	-3.43071	5.23144e-21	2.2859e-18	NW_006271970.1	GO:0004181;GO:0006508	K01293	opiNOG04243	E	sp|O13968|YE48_SCHPO Uncharacterized carboxypeptidase C24C9.08 OS=Schizosaccharomyces pombe (strain 972 / ATCC 24843) GN=SPAC24C9.08 PE=3 SV=1	vacuolar carboxypeptidase Cps1, putative	18165602	GO:0006508//proteolysis;	-	GO:0004181//metallocarboxypeptidase activity;	-
CCM_07790	11729.8	1341.51	-3.12825	1.37364e-20	5.74122e-18	NW_006271974.1	GO:0042626;GO:0005524;GO:0016021;GO:0006855;GO:0005886	-	sordNOG05136;opiNOG02145	Q	sp|A0A0D1CZ63|FER6_USTMA Multidrug resistance protein fer6 OS=Ustilago maydis (strain 521 / FGSC 9021) GN=fer6 PE=2 SV=1	multidrug resistance-associated protein 5	18169800	GO:0006855//xenobiotic transmembrane transport;	GO:0016021//integral component of membrane;GO:0005886//plasma membrane;	GO:0042626//ATPase-coupled transmembrane transporter activity;GO:0005524//ATP binding;	-
CCM_09424	3992.09	607.833	-2.7154	2.68047e-20	1.07364e-17	NW_006271977.1	GO:0016884	-	sordNOG06224;sordNOG05310	KR	sp|Q9LVH5|OE64C_ARATH Outer envelope protein 64, chloroplastic OS=Arabidopsis thaliana GN=OEP64 PE=1 SV=1	amidase, putative	18171427	-	-	GO:0016884//carbon-nitrogen ligase activity, with glutamine as amido-N-donor;	-
CCM_08119	57925.7	10204.2	-2.50504	5.68252e-20	2.101e-17	NW_006271974.1	GO:0005524;GO:0006542;GO:0004356	K01915	sordNOG09037	E	sp|Q9UUN6|GLNA_FUSSH Glutamine synthetase OS=Fusarium solani subsp. phaseoli GN=GLN1 PE=2 SV=1	glutamine synthetase	18170128	GO:0006542//glutamine biosynthetic process;	-	GO:0005524//ATP binding;GO:0004356//glutamate-ammonia ligase activity;	ko04727(GABAergic synapse);ko04724(Glutamatergic synapse);ko04217(Necroptosis);ko02020(Two-component system);ko00910(Nitrogen metabolism);ko00630(Glyoxylate and dicarboxylate metabolism);ko00250(Alanine, aspartate and glutamate metabolism);ko00220(Arginine biosynthesis)
CCM_07854	1791.73	290.638	-2.62406	6.81221e-20	2.4254e-17	NW_006271974.1	GO:0016021	-	-	-	-	hypothetical protein	18169864	-	GO:0016021//integral component of membrane;	-	-
CCM_00340	967.573	148.698	-2.70198	1.15576e-18	3.96796e-16	NW_006271969.1	GO:0005737;GO:0006629;GO:0055114;GO:0016021;GO:0016627	-	sordNOG09295;opiNOG04155	SR	-	membrane protein, putative	18162375	GO:0006629//lipid metabolic process;GO:0055114//obsolete oxidation-reduction process;	GO:0005737//cytoplasm;GO:0016021//integral component of membrane;	GO:0016627//oxidoreductase activity, acting on the CH-CH group of donors;	-
CCM_09664	21109.1	3142.29	-2.74798	2.43671e-18	8.07727e-16	NW_006271978.1	GO:0016021	-	-	-	-	hypothetical protein	18171666	-	GO:0016021//integral component of membrane;	-	-
CCM_05703	12922.3	1190.3	-3.44047	1.54475e-17	4.94988e-15	NW_006271972.1	GO:0008168;GO:0032259	-	opiNOG07324;sordNOG12146	R	sp|Q5C9L6|CNMT_THLFG (S)-coclaurine N-methyltransferase OS=Thalictrum flavum subsp. glaucum PE=1 SV=1	SAM-dependent methyltransferase	18167721	GO:0032259//methylation;	-	GO:0008168//methyltransferase activity;	-
CCM_03587	2469.37	14.5916	-7.40286	1.77252e-17	5.49652e-15	NW_006271970.1	GO:0005576;GO:0005975;GO:0030248;GO:0004553	K01183	NOG126988;NOG122945;opiNOG07753	G	sp|E9F9R9|CHI2_METRA Endochitinase 2 OS=Metarhizium robertsii (strain ARSEF 23 / ATCC MYA-3075) GN=chi2 PE=3 SV=2	chitinase 3 precursor, putative	18165613	GO:0005975//carbohydrate metabolic process;	GO:0005576//extracellular region;	GO:0030248//cellulose binding;GO:0004553//hydrolase activity, hydrolyzing O-glycosyl compounds;	ko00520(Amino sugar and nucleotide sugar metabolism)
CCM_09156	393.323	45.4774	-3.11249	7.40434e-17	2.22431e-14	NW_006271976.1	-	-	necNOG13283;opiNOG66310	R	-	hypothetical protein	18171159	-	-	-	-
CCM_02867	243.02	30.6487	-2.98718	2.0763e-15	4.98988e-13	NW_006271970.1	GO:0005975;GO:0004553	-	COG2273;opiNOG49246;sordNOG08781	RG	sp|P23903|E13B_BACCI Glucan endo-1,3-beta-glucosidase A1 OS=Bacillus circulans GN=glcA PE=1 SV=1	secreted glucosidase	18164894	GO:0005975//carbohydrate metabolic process;	-	GO:0004553//hydrolase activity, hydrolyzing O-glycosyl compounds;	-
CCM_07084	579.16	3.50122	-7.36996	6.40648e-15	1.46632e-12	NW_006271973.1	GO:0006950;GO:0016021	-	hypNOG04233;sordNOG06213	S	sp|O13780|YEO2_SCHPO Uncharacterized protein C17G6.02c OS=Schizosaccharomyces pombe (strain 972 / ATCC 24843) GN=SPAC17G6.02c PE=4 SV=1	RTA1 like protein	18169095	GO:0006950//response to stress;	GO:0016021//integral component of membrane;	-	-
CCM_03715	2260.97	511.954	-2.14285	1.20197e-14	2.62603e-12	NW_006271971.1	GO:0016788;GO:0009058	-	sordNOG12940;sordNOG12959	S	sp|J4UHQ6|OPS1_BEAB2 Orsellinic acid synthase OS=Beauveria bassiana (strain ARSEF 2860) GN=OpS1 PE=1 SV=1	Thioesterase	18165739	GO:0009058//biosynthetic process;	-	GO:0016788//hydrolase activity, acting on ester bonds;	-
CCM_00990	12029.4	342.096	-5.13602	4.92654e-14	1.00763e-11	NW_006271969.1	GO:0005737;GO:0016627;GO:0016021;GO:0055114;GO:0006629	-	opiNOG04155;sordNOG08642	IR	-	hypothetical protein	18163023	GO:0055114//obsolete oxidation-reduction process;GO:0006629//lipid metabolic process;	GO:0005737//cytoplasm;GO:0016021//integral component of membrane;	GO:0016627//oxidoreductase activity, acting on the CH-CH group of donors;	-
CCM_01430	906.461	192.013	-2.23904	6.82771e-14	1.36739e-11	NW_006271969.1	GO:0050662;GO:0003824	-	opiNOG03439;sordNOG05428	R	sp|O74482|YQJ9_SCHPO Uncharacterized protein C1840.09 OS=Schizosaccharomyces pombe (strain 972 / ATCC 24843) GN=SPCC1840.09 PE=3 SV=1	NAD dependent epimerase/dehydratase family protein	18163461	-	-	GO:0050662//obsolete coenzyme binding;GO:0003824//catalytic activity;	-
CCM_09009	171.033	21.7118	-2.97773	3.77459e-13	7.11473e-11	NW_006271975.1	GO:0046872;GO:0008233;GO:0006508	K05994	sordNOG07797;opiNOG22721	PO	sp|Q2H1T8|LAP1_CHAGB Leucine aminopeptidase 1 OS=Chaetomium globosum (strain ATCC 6205 / CBS 148.51 / DSM 1962 / NBRC 6347 / NRRL 1970) GN=LAP1 PE=3 SV=1	peptidase	18171013	GO:0006508//proteolysis;	-	GO:0046872//metal ion binding;GO:0008233//peptidase activity;	-
CCM_07353	506.433	32.7925	-3.94894	3.86859e-13	7.15168e-11	NW_006271974.1	GO:0005737;GO:0000287;GO:0044208;GO:0005525;GO:0004019	K01939	sorNOG02627;sordNOG09078	F	sp|Q7S604|PURA_NEUCR Adenylosuccinate synthetase OS=Neurospora crassa (strain ATCC 24698 / 74-OR23-1A / CBS 708.71 / DSM 1257 / FGSC 987) GN=NCU09789 PE=3 SV=1	adenylosuccinate synthetase	18169364	GO:0044208//'de novo' AMP biosynthetic process;	GO:0005737//cytoplasm;	GO:0000287//magnesium ion binding;GO:0005525//GTP binding;GO:0004019//adenylosuccinate synthase activity;	ko00250(Alanine, aspartate and glutamate metabolism);ko00230(Purine metabolism)
CCM_00774	3104.1	428.414	-2.8571	4.94364e-13	8.8006e-11	NW_006271969.1	GO:0003913;GO:0006281	K01669	opiNOG03959;sordNOG09425	TL	sp|Q7SI68|CRYD_NEUCR Putative cryptochrome DASH, mitochondrial OS=Neurospora crassa (strain ATCC 24698 / 74-OR23-1A / CBS 708.71 / DSM 1257 / FGSC 987) GN=cry PE=3 SV=1	cryptochrome DASH	18162808	GO:0006281//DNA repair;	-	GO:0003913//DNA photolyase activity;	-
CCM_07855	243839	17446.9	-3.80489	1.00907e-12	1.73218e-10	NW_006271974.1	-	-	-	-	-	RNA binding protein	18169865	-	-	-	-
CCM_09038	136.694	5.01643	-4.76814	1.45408e-12	2.41e-10	NW_006271975.1	GO:0006950;GO:0016021	-	opiNOG56426;opiNOG16708;hypNOG06844	S	sp|P40113|RTM1_YEASX Protein RTM1 OS=Saccharomyces cerevisiae GN=RTM1 PE=3 SV=1	RTA1 like protein	18171042	GO:0006950//response to stress;	GO:0016021//integral component of membrane;	-	-
CCM_03515	3792.09	1015.3	-1.90109	2.20868e-12	3.5694e-10	NW_006271970.1	GO:0015171;GO:0016021;GO:0003333	K19564	sordNOG04425	E	sp|P19807|HNM1_YEAST Choline transport protein OS=Saccharomyces cerevisiae (strain ATCC 204508 / S288c) GN=HNM1 PE=1 SV=1	GABA permease, putative	18165541	GO:0003333//amino acid transmembrane transport;	GO:0016021//integral component of membrane;	GO:0015171//amino acid transmembrane transporter activity;	-
CCM_07141	3449.8	914.089	-1.91611	2.22786e-12	3.5694e-10	NW_006271973.1	GO:0000981;GO:0005634;GO:0003677;GO:0006357;GO:0008270	-	sordNOG10651	S	sp|P28348|NIRA_EMENI Nitrogen assimilation transcription factor nirA OS=Emericella nidulans (strain FGSC A4 / ATCC 38163 / CBS 112.46 / NRRL 194 / M139) GN=nirA PE=4 SV=1	C6 transcription factor, putative	18169152	GO:0006357//regulation of transcription by RNA polymerase II;	GO:0005634//nucleus;	GO:0000981//DNA-binding transcription factor activity, RNA polymerase II-specific;GO:0003677//DNA binding;GO:0008270//zinc ion binding;	-
CCM_03401	2424.51	604.935	-2.00284	6.76586e-12	1.06623e-09	NW_006271970.1	GO:0055114;GO:0004411;GO:0006559;GO:0006570	K00451	opiNOG02447;sordNOG07801	E	sp|Q9Y041|HGD_CAEEL Homogentisate 1,2-dioxygenase OS=Caenorhabditis elegans GN=hgo-1 PE=2 SV=2	homogentisate 1,2-dioxygenase, putative	18165427	GO:0055114//obsolete oxidation-reduction process;GO:0006559//L-phenylalanine catabolic process;GO:0006570//tyrosine metabolic process;	-	GO:0004411//homogentisate 1,2-dioxygenase activity;	ko00643(Styrene degradation);ko00350(Tyrosine metabolism)
CCM_03402	150.722	20.3408	-2.88944	7.70839e-12	1.19517e-09	NW_006271970.1	GO:0016021;GO:0004497;GO:0055114;GO:0016705;GO:0005506;GO:0020037	-	opiNOG21944;sordNOG08926	Q	sp|P0DPA7|PSIH_PSICU Cytochrome P450 monooxygenase psiH OS=Psilocybe cubensis GN=psiH PE=1 SV=1	O-methylsterigmatocystin oxidoreductase, putative	18165428	GO:0055114//obsolete oxidation-reduction process;	GO:0016021//integral component of membrane;	GO:0004497//monooxygenase activity;GO:0016705//oxidoreductase activity, acting on paired donors, with incorporation or reduction of molecular oxygen;GO:0005506//iron ion binding;GO:0020037//heme binding;	-
CCM_03920	695.473	139.537	-2.31735	9.13748e-12	1.39426e-09	NW_006271971.1	-	-	sordNOG12856;opiNOG35177;sordNOG12783	S	-	hypothetical protein	18165943	-	-	-	-
CCM_02751	1446.41	384.584	-1.9111	9.39781e-12	1.41158e-09	NW_006271970.1	GO:0016021;GO:0055114;GO:0016628	K00222	sordNOG10146	I	sp|Q01447|ERG24_FUSSO Delta(14)-sterol reductase OS=Fusarium solani subsp. pisi PE=3 SV=1	delta(14)-sterol reductase	18164778	GO:0055114//obsolete oxidation-reduction process;	GO:0016021//integral component of membrane;	GO:0016628//oxidoreductase activity, acting on the CH-CH group of donors, NAD or NADP as acceptor;	ko00100(Steroid biosynthesis)
CCM_05414	1419.38	265.265	-2.41976	1.22411e-11	1.78293e-09	NW_006271972.1	-	-	hypNOG05371;necNOG08713;hypNOG08390	S	-	hypothetical protein	18167432	-	-	-	-
CCM_00420	3464.36	510.951	-2.76133	1.8961e-11	2.72048e-09	NW_006271969.1	-	K00574	sordNOG06517;opiNOG15338	R	sp|O53732|UFAA1_MYCTU Tuberculostearic acid methyltransferase UfaA1 OS=Mycobacterium tuberculosis (strain ATCC 25618 / H37Rv) GN=ufaA1 PE=1 SV=3	methoxy mycolic acid synthase 1	18162455	-	-	-	-
CCM_00377	160.624	23.6311	-2.76493	5.50963e-11	7.45972e-09	NW_006271969.1	GO:0055085;GO:0016021	-	COG0477;magNOG04098;sordNOG06197;opiNOG18573	RG	sp|D2E9W8|DEP3_ALTBR Efflux pump DEP3 OS=Alternaria brassicicola GN=DEP3 PE=2 SV=1	Major facilitator superfamily transporter	18162412	GO:0055085//transmembrane transport;	GO:0016021//integral component of membrane;	-	-
CCM_01491	488.422	120.798	-2.01553	8.15272e-11	1.05908e-08	NW_006271969.1	-	-	opiNOG67058;opiNOG45053;sordNOG14486	SR	-	hypothetical protein	18163522	-	-	-	-
CCM_02566	96558.1	29408.6	-1.71516	9.87394e-11	1.26558e-08	NW_006271970.1	GO:0016021	-	opiNOG26592;opiNOG58681	S	-	hypothetical protein	18164593	-	GO:0016021//integral component of membrane;	-	-
CCM_05075	75.0881	6.46655	-3.53752	3.44605e-10	4.19328e-08	NW_006271972.1	-	-	-	-	-	hypothetical protein	18167095	-	-	-	-
CCM_04562	5493.5	1667.36	-1.72016	5.42084e-10	6.4334e-08	NW_006271971.1	GO:0050821;GO:0051604;GO:0042026;GO:0051082;GO:0003688;GO:0005758;GO:0045041;GO:0005524;GO:0016887;GO:0003697;GO:0031966;GO:0006458;GO:0042645;GO:0051131;GO:0051087	K04077	opiNOG03353;sordNOG07205	O	sp|Q5B041|HSP60_EMENI Heat shock protein 60 OS=Emericella nidulans (strain FGSC A4 / ATCC 38163 / CBS 112.46 / NRRL 194 / M139) GN=hsp60 PE=1 SV=1	heat shock protein 60 (Antigen HIS-62)	18166585	GO:0050821//protein stabilization;GO:0051604//protein maturation;GO:0042026//protein refolding;GO:0045041//protein import into mitochondrial intermembrane space;GO:0006458//'de novo' protein folding;GO:0051131//chaperone-mediated protein complex assembly;	GO:0005758//mitochondrial intermembrane space;GO:0031966//mitochondrial membrane;GO:0042645//mitochondrial nucleoid;	GO:0051082//unfolded protein binding;GO:0003688//DNA replication origin binding;GO:0005524//ATP binding;GO:0016887//ATP hydrolysis activity;GO:0003697//single-stranded DNA binding;GO:0051087//chaperone binding;	ko05417(Lipid and atherosclerosis);ko05152(Tuberculosis);ko05134(Legionellosis);ko04940(Type I diabetes mellitus);ko04212(Longevity regulating pathway - worm);ko03018(RNA degradation)
CCM_06820	346.031	47.7622	-2.85696	6.0322e-10	6.98645e-08	NW_006271973.1	GO:0000166;GO:0003723	-	sorNOG01944;sordNOG06006	TRA	sp|A9LNK9|CPSF_ARATH 30-kDa cleavage and polyadenylation specificity factor 30 OS=Arabidopsis thaliana GN=CPSF30 PE=1 SV=1	YT521-B-like splicing factor, putative	18168831	-	-	GO:0000166//nucleotide binding;GO:0003723//RNA binding;	-
CCM_08804	731.264	211.49	-1.7898	8.08499e-10	9.14365e-08	NW_006271975.1	-	-	COG0251	J	-	Endoribonuclease L-PSP/chorismate mutase-like protein	18170809	-	-	-	-
CCM_07083	244.663	1.40921	-7.43976	8.35821e-10	9.34273e-08	NW_006271973.1	-	-	opiNOG75713;opiNOG60480;hypNOG11117	SR	-	SCP-like extracellular	18169094	-	-	-	-
CCM_00919	4451.77	1436.53	-1.63179	9.29057e-10	1.02655e-07	NW_006271969.1	-	-	sorNOG07199;sordNOG05996	C	sp|O23016|KCAB_ARATH Probable voltage-gated potassium channel subunit beta OS=Arabidopsis thaliana GN=KAB1 PE=1 SV=1	voltage-gated K channel beta subunit, putative	18162952	-	-	-	-
CCM_01809	3975.5	720.173	-2.46472	1.25578e-09	1.3718e-07	NW_006271969.1	GO:0000981;GO:0005634;GO:0008270;GO:0003677;GO:0006357	-	sorNOG00581;opiNOG17151;pleNOG00002;sordNOG04713	S	-	Fungal transcriptional regulatory protein	18163839	GO:0006357//regulation of transcription by RNA polymerase II;	GO:0005634//nucleus;	GO:0000981//DNA-binding transcription factor activity, RNA polymerase II-specific;GO:0008270//zinc ion binding;GO:0003677//DNA binding;	-
CCM_08919	474.462	43.2124	-3.45677	1.29531e-09	1.39908e-07	NW_006271975.1	-	-	hypNOG12757;necNOG13939	S	-	hypothetical protein	18170924	-	-	-	-
CCM_06110	210.765	1.32197	-7.3168	1.53843e-09	1.62516e-07	NW_006271972.1	-	-	-	-	-	hypothetical protein	18168125	-	-	-	-
CCM_02567	226916	75441.5	-1.58873	1.80122e-09	1.88208e-07	NW_006271970.1	-	-	-	-	-	hypothetical protein	18164594	-	-	-	-
CCM_07874	11978.2	3001.95	-1.99644	1.98923e-09	2.01289e-07	NW_006271974.1	-	-	sorNOG08845;sorNOG08840;opiNOG41588	S	sp|Q7S6U4|CVNH_NEUCR Cyanovirin-N homolog OS=Neurospora crassa (strain ATCC 24698 / 74-OR23-1A / CBS 708.71 / DSM 1257 / FGSC 987) GN=NCU05495 PE=1 SV=2	Cyanovirin-N	18169884	-	-	-	-
CCM_08396	169.149	33.4967	-2.3362	2.36852e-09	2.32332e-07	NW_006271975.1	-	-	-	-	-	hypothetical protein	18170404	-	-	-	-
CCM_01903	40.3714	0.960566	-5.3933	2.64766e-09	2.5709e-07	NW_006271969.1	GO:0004185;GO:0006508	K01288	pleNOG00112;opiNOG06570;sordNOG06057	EO	sp|D4AQA7|PEPS_ARTBC Probable serine carboxypeptidase ARB_06414 OS=Arthroderma benhamiae (strain ATCC MYA-4681 / CBS 112371) GN=ARB_06414 PE=1 SV=1	carboxypeptidase cpdS	18163932	GO:0006508//proteolysis;	-	GO:0004185//serine-type carboxypeptidase activity;	-
CCM_07332	10206.2	2845.92	-1.84248	4.18426e-09	3.90517e-07	NW_006271974.1	GO:0016021	-	opiNOG22603;sordNOG04605	S	sp|Q54U75|CRLA_DICDI Cyclic AMP receptor-like protein A OS=Dictyostelium discoideum GN=crlA PE=2 SV=1	hypothetical protein	18169343	-	GO:0016021//integral component of membrane;	-	-
CCM_04384	127.976	21.672	-2.56197	4.34201e-09	4.01344e-07	NW_006271971.1	-	-	sordNOG09758	S	sp|P76481|YFBK_ECOLI Uncharacterized protein YfbK OS=Escherichia coli (strain K12) GN=yfbK PE=4 SV=1	U-box domain-containing protein	18166407	-	-	-	-
CCM_06967	3097.52	1033.62	-1.58341	5.88397e-09	5.18923e-07	NW_006271973.1	GO:0005388;GO:0046872;GO:0070588;GO:0016021;GO:0005524	K05853	sordNOG06721	P	sp|Q7PPA5|ATC1_ANOGA Calcium-transporting ATPase sarcoplasmic/endoplasmic reticulum type OS=Anopheles gambiae GN=Ca-P60A PE=3 SV=5	calcium-transporting ATPase	18168978	GO:0070588//calcium ion transmembrane transport;	GO:0016021//integral component of membrane;	GO:0005388//P-type calcium transporter activity;GO:0046872//metal ion binding;GO:0005524//ATP binding;	ko05415(Diabetic cardiomyopathy);ko05414(Dilated cardiomyopathy);ko05412(Arrhythmogenic right ventricular cardiomyopathy);ko05410(Hypertrophic cardiomyopathy);ko05022(Pathways of neurodegeneration - multiple diseases);ko05017(Spinocerebellar ataxia);ko05010(Alzheimer disease);ko04972(Pancreatic secretion);ko04919(Thyroid hormone signaling pathway);ko04261(Adrenergic signaling in cardiomyocytes);k…
CCM_06988	1929.79	637.232	-1.59856	8.27467e-09	7.16616e-07	NW_006271973.1	GO:0008483;GO:0009058;GO:0030170	K00838	sordNOG11379	E	sp|O14192|AATR1_SCHPO Aromatic amino acid aminotransferase C56E4.03 OS=Schizosaccharomyces pombe (strain 972 / ATCC 24843) GN=SPAC56E4.03 PE=3 SV=1	L-kynurenine/alpha-aminoadipate aminotransferase, putative	18168999	GO:0009058//biosynthetic process;	-	GO:0008483//transaminase activity;GO:0030170//pyridoxal phosphate binding;	ko00960(Tropane, piperidine and pyridine alkaloid biosynthesis);ko00950(Isoquinoline alkaloid biosynthesis);ko00401(Novobiocin biosynthesis);ko00400(Phenylalanine, tyrosine and tryptophan biosynthesis);ko00380(Tryptophan metabolism);ko00360(Phenylalanine metabolism);ko00350(Tyrosine metabolism);ko00300(Lysine biosynthesis);ko00270(Cysteine and methionine metabolism);ko00130(Ubiquinone and other t…
CCM_02559	66249.7	23213.6	-1.51295	9.64473e-09	8.27811e-07	NW_006271970.1	GO:0016021	-	sorNOG07832;dotNOG10198;opiNOG26592	S	sp|A0A0U1LQF6|CCTO_TALIS Cyclochlorotine biosynthesis protein O OS=Talaromyces islandicus GN=cctO PE=3 SV=1	hypothetical protein	18164586	-	GO:0016021//integral component of membrane;	-	-
CCM_09604	16404.3	5418.33	-1.59815	4.66309e-08	3.76691e-06	NW_006271978.1	-	-	opiNOG63745;sordNOG05240	SO	-	hypothetical protein	18171606	-	-	-	-
CCM_02564	63483.7	23456.6	-1.43639	4.93045e-08	3.9497e-06	NW_006271970.1	GO:0016021	-	opiNOG20268	S	-	integral membrane protein	18164591	-	GO:0016021//integral component of membrane;	-	-
CCM_08205	5512.02	2046.28	-1.42958	5.29997e-08	4.17612e-06	NW_006271974.1	-	-	opiNOG05899;sordNOG04603;opiNOG40025	R	sp|I1RF63|AURS_GIBZE Aurofusarin biosynthesis cluster protein S OS=Gibberella zeae (strain PH-1 / ATCC MYA-4620 / FGSC 9075 / NRRL 31084) GN=aurS PE=1 SV=1	Fasciclin domain family protein	18170213	-	-	-	-
CCM_03777	697.912	69.8525	-3.32066	6.10592e-08	4.74038e-06	NW_006271971.1	GO:0001077;GO:0060237;GO:0045944;GO:0000978;GO:0005634;GO:0046872;GO:0005829;GO:0071322	-	sordNOG07334;NOG01669	R	-	zinc finger protein OZF	18165800	GO:0060237//regulation of fungal-type cell wall organization;GO:0045944//positive regulation of transcription by RNA polymerase II;GO:0071322//cellular response to carbohydrate stimulus;	GO:0005634//nucleus;GO:0005829//cytosol;	GO:0000978//RNA polymerase II cis-regulatory region sequence-specific DNA binding;GO:0046872//metal ion binding;	-
CCM_08259	2180.84	777.736	-1.48753	6.14771e-08	4.74038e-06	NW_006271975.1	GO:0055085;GO:0016021	-	sordNOG11322;opiNOG17879	G	sp|Q5ATG7|APDF_EMENI Aspyridones efflux protein apdF OS=Emericella nidulans (strain FGSC A4 / ATCC 38163 / CBS 112.46 / NRRL 194 / M139) GN=apdF PE=2 SV=1	MFS monocarboxylate transporter, putative	18170267	GO:0055085//transmembrane transport;	GO:0016021//integral component of membrane;	-	-
CCM_04059	9234.1	3404.67	-1.43946	6.16402e-08	4.74038e-06	NW_006271971.1	GO:0006457;GO:0005829;GO:0051087;GO:0032781;GO:0001671;GO:0006950	-	opiNOG02570;sordNOG06615	S	sp|Q9P782|YNY8_SCHPO Uncharacterized protein C1711.08 OS=Schizosaccharomyces pombe (strain 972 / ATCC 24843) GN=SPBC1711.08 PE=2 SV=1	Activator of Hsp90 ATPase	18166082	GO:0006457//protein folding;GO:0032781//positive regulation of ATP-dependent activity;GO:0006950//response to stress;	GO:0005829//cytosol;	GO:0051087//chaperone binding;GO:0001671//ATPase activator activity;	-
CCM_09291	240.132	66.6743	-1.84863	8.9158e-08	6.74863e-06	NW_006271976.1	-	-	sordNOG09359;pleNOG07708;opiNOG24207	SR	-	hypothetical protein	18171294	-	-	-	-
CCM_04816	261.801	63.7074	-2.03894	9.50339e-08	7.02739e-06	NW_006271971.1	-	-	opiNOG02368;opiNOG22876	R	sp|D4ALG0|LYSM1_ARTBC LysM domain-containing protein ARB_05157 OS=Arthroderma benhamiae (strain ATCC MYA-4681 / CBS 112371) GN=ARB_05157 PE=1 SV=1	LysM domain protein	18166837	-	-	-	-
CCM_05618	3119.75	1155.15	-1.43335	1.02469e-07	7.48778e-06	NW_006271972.1	GO:0005634;GO:0000981;GO:0008270;GO:0003677;GO:0006357	-	sordNOG11449	S	sp|Q1MTM9|YFN1_SCHPO Uncharacterized transcriptional regulatory protein C1327.01c OS=Schizosaccharomyces pombe (strain 972 / ATCC 24843) GN=SPAC1327.01c PE=1 SV=2	C6 transcription factor	18167636	GO:0006357//regulation of transcription by RNA polymerase II;	GO:0005634//nucleus;	GO:0000981//DNA-binding transcription factor activity, RNA polymerase II-specific;GO:0008270//zinc ion binding;GO:0003677//DNA binding;	-
CCM_07413	197.32	52.0567	-1.92238	1.03564e-07	7.48778e-06	NW_006271974.1	GO:0005524	-	COG0464;opiNOG19869;opiNOG04334	O	-	AAA family ATPase	18169424	-	-	GO:0005524//ATP binding;	-
CCM_08295	3190.53	844.465	-1.91769	1.03597e-07	7.48778e-06	NW_006271975.1	GO:0016021	K17991	sordNOG05598;pleNOG05460;opiNOG23153	S	sp|O22788|PXG3_ARATH Probable peroxygenase 3 OS=Arabidopsis thaliana GN=PXG3 PE=1 SV=1	caleosin domain containing protein	18170303	-	GO:0016021//integral component of membrane;	-	ko00073(Cutin, suberine and wax biosynthesis)
CCM_06634	163.158	40.864	-1.99737	1.20571e-07	8.6496e-06	NW_006271973.1	GO:0005758	-	sordNOG14426;opiNOG44602;sorNOG08437	S	sp|C5DT65|CMC4_ZYGRC Cx9C motif-containing protein 4, mitochondrial OS=Zygosaccharomyces rouxii (strain ATCC 2623 / CBS 732 / NBRC 1130 / NCYC 568 / NRRL Y-229) GN=CMC4 PE=3 SV=1	mature-T-cell-proliferation protein	18168648	-	GO:0005758//mitochondrial intermembrane space;	-	-
CCM_06055	1568.7	553.813	-1.5021	1.24307e-07	8.8516e-06	NW_006271972.1	GO:0005829;GO:0005634	-	opiNOG31823;sorNOG04690;sordNOG04975	S	sp|O59727|YHX7_SCHPO Protein PBDC1 homolog OS=Schizosaccharomyces pombe (strain 972 / ATCC 24843) GN=SPBC3E7.07c PE=3 SV=1	DUF757 domain protein	18168070	-	GO:0005829//cytosol;GO:0005634//nucleus;	-	-
CCM_08870	4400.75	1655.14	-1.4108	1.51628e-07	1.04114e-05	NW_006271975.1	GO:0016208;GO:0003987;GO:0005524;GO:0019427	K01895	opiNOG00481	I	sp|P16929|ACSA_NEUCR Acetyl-coenzyme A synthetase OS=Neurospora crassa (strain ATCC 24698 / 74-OR23-1A / CBS 708.71 / DSM 1257 / FGSC 987) GN=acu-5 PE=2 SV=2	acetyl-coenzyme A synthetase	18170875	GO:0019427//acetyl-CoA biosynthetic process from acetate;	-	GO:0016208//AMP binding;GO:0003987//acetate-CoA ligase activity;GO:0005524//ATP binding;	ko00720(Carbon fixation pathways in prokaryotes);ko00680(Methane metabolism);ko00640(Propanoate metabolism);ko00630(Glyoxylate and dicarboxylate metabolism);ko00620(Pyruvate metabolism);ko00010(Glycolysis / Gluconeogenesis)
CCM_03505	760.43	266.398	-1.51323	1.84926e-07	1.26077e-05	NW_006271970.1	GO:0016301;GO:0016310	-	sorNOG06246;sordNOG09789;opiNOG26167	R	-	Protein kinase-like domain	18165531	GO:0016310//phosphorylation;	-	GO:0016301//kinase activity;	-
CCM_06052	4286.08	1203.99	-1.83184	2.55164e-07	1.72739e-05	NW_006271972.1	GO:0055085;GO:0016021	-	sordNOG06498	R	sp|O59699|YN42_SCHPO Uncharacterized transporter C36.02c OS=Schizosaccharomyces pombe (strain 972 / ATCC 24843) GN=SPBC36.02c PE=3 SV=1	MFS multidrug transporter, putative	18168067	GO:0055085//transmembrane transport;	GO:0016021//integral component of membrane;	-	-
CCM_04508	10079.7	3962.71	-1.34689	2.7453e-07	1.8455e-05	NW_006271971.1	-	-	hypNOG08145;opiNOG64025	SR	-	hypothetical protein	18166531	-	-	-	-
CCM_08302	267.196	24.6423	-3.43869	2.84303e-07	1.89792e-05	NW_006271975.1	GO:0016021	-	opiNOG03174;sordNOG07410	S	-	hypothetical protein	18170310	-	GO:0016021//integral component of membrane;	-	-
CCM_02314	217.789	61.838	-1.81637	3.006e-07	1.99288e-05	NW_006271970.1	-	-	-	-	-	hypothetical protein	18164341	-	-	-	-
CCM_03004	2239.57	858.944	-1.38258	3.03708e-07	1.99969e-05	NW_006271970.1	GO:0005829;GO:0005634;GO:0005743;GO:0004325;GO:0006783	K01772	sordNOG08785	H	sp|P16622|HEMH_YEAST Ferrochelatase, mitochondrial OS=Saccharomyces cerevisiae (strain ATCC 204508 / S288c) GN=HEM15 PE=1 SV=1	ferrochelatase precursor	18165031	GO:0006783//heme biosynthetic process;	GO:0005829//cytosol;GO:0005634//nucleus;GO:0005743//mitochondrial inner membrane;	GO:0004325//ferrochelatase activity;	ko00860(Porphyrin metabolism)
CCM_03011	6690.92	2651.14	-1.33559	3.58631e-07	2.31377e-05	NW_006271970.1	GO:0008270;GO:0006357;GO:0003677;GO:0005634;GO:0000981	-	NOG125814;sordNOG05709	S	sp|Q09922|YAKB_SCHPO Uncharacterized transcriptional regulatory protein C1F7.11c OS=Schizosaccharomyces pombe (strain 972 / ATCC 24843) GN=SPAC1F7.11c PE=4 SV=1	Zn(II)2Cys6 transcription factor	18165038	GO:0006357//regulation of transcription by RNA polymerase II;	GO:0005634//nucleus;	GO:0008270//zinc ion binding;GO:0003677//DNA binding;GO:0000981//DNA-binding transcription factor activity, RNA polymerase II-specific;	-
CCM_04761	707.626	233.7	-1.59833	4.6236e-07	2.90501e-05	NW_006271971.1	GO:0003677;GO:0016021	-	opiNOG58297;sordNOG05806	K	-	MYB DNA-binding domain protein	18166782	-	GO:0016021//integral component of membrane;	GO:0003677//DNA binding;	-
CCM_08790	686.159	250.762	-1.45223	4.87973e-07	3.02637e-05	NW_006271975.1	-	-	opiNOG57227;opiNOG32390	RS	-	hypothetical protein	18170795	-	-	-	-
CCM_09161	763.648	272.809	-1.48502	5.31234e-07	3.27356e-05	NW_006271976.1	GO:0071035;GO:0000467;GO:0071051;GO:0071038;GO:0034475;GO:0003723;GO:0000177;GO:0000176;GO:0034427;GO:0071049	K03679	sordNOG10530;opiNOG04896	J	sp|Q09704|RRP4_SCHPO Exosome complex component rrp4 OS=Schizosaccharomyces pombe (strain 972 / ATCC 24843) GN=rrp4 PE=3 SV=1	exosome component 2	18171164	GO:0071035//nuclear polyadenylation-dependent rRNA catabolic process;GO:0000467//exonucleolytic trimming to generate mature 3'-end of 5.8S rRNA from tricistronic rRNA transcript (SSU-rRNA, 5.8S rRNA, LSU-rRNA);GO:0071051//polyadenylation-dependent snoRNA 3'-end processing;GO:0071038//nuclear polyadenylation-dependent tRNA catabolic process;GO:0034475//U4 snRNA 3'-end processing;GO:0034427//nuclea…	GO:0000177//cytoplasmic exosome (RNase complex);GO:0000176//nuclear exosome (RNase complex);	GO:0003723//RNA binding;	ko03018(RNA degradation)
CCM_05984	3473.13	1383.62	-1.3278	5.45485e-07	3.33997e-05	NW_006271972.1	GO:0016021;GO:0055085;GO:0008643;GO:0022891	-	sordNOG07827;opiNOG00328	R	sp|P39932|STL1_YEAST Sugar transporter STL1 OS=Saccharomyces cerevisiae (strain ATCC 204508 / S288c) GN=STL1 PE=1 SV=2	sugar transporter STL1	18168002	GO:0055085//transmembrane transport;GO:0008643//carbohydrate transport;	GO:0016021//integral component of membrane;	-	-
CCM_02561	77543.3	31262.4	-1.31057	5.86942e-07	3.5486e-05	NW_006271970.1	GO:0016021	-	sorNOG07832;opiNOG26592;dotNOG10198	S	sp|A0A0U1LQF6|CCTO_TALIS Cyclochlorotine biosynthesis protein O OS=Talaromyces islandicus GN=cctO PE=3 SV=1	hypothetical protein	18164588	-	GO:0016021//integral component of membrane;	-	-
CCM_06281	1484.6	568.709	-1.38432	6.12631e-07	3.68076e-05	NW_006271972.1	GO:0016310;GO:0055114;GO:0003942;GO:0006526;GO:0051287;GO:0016301	-	opiNOG74585;COG0002;opiNOG78113	E	sp|P54898|ARG56_NEUCR Protein arg-6, mitochondrial OS=Neurospora crassa (strain ATCC 24698 / 74-OR23-1A / CBS 708.71 / DSM 1257 / FGSC 987) GN=arg-6 PE=1 SV=2	acetylglutamate kinase, putative	18168296	GO:0016310//phosphorylation;GO:0055114//obsolete oxidation-reduction process;GO:0006526//arginine biosynthetic process;	-	GO:0003942//N-acetyl-gamma-glutamyl-phosphate reductase activity;GO:0051287//NAD binding;GO:0016301//kinase activity;	-
CCM_00151	2345.38	160.156	-3.87227	6.49988e-07	3.88096e-05	NW_006271969.1	GO:0016829	K01669	sordNOG09856;opiNOG02695	TL	sp|P27526|PHR_NEUCR Deoxyribodipyrimidine photo-lyase OS=Neurospora crassa (strain ATCC 24698 / 74-OR23-1A / CBS 708.71 / DSM 1257 / FGSC 987) GN=phr PE=3 SV=2	deoxyribodipyrimidine photo-lyase Phr1, putative	18162186	-	-	GO:0016829//lyase activity;	-
CCM_01143	1486.69	578.086	-1.36275	7.33009e-07	4.32295e-05	NW_006271969.1	GO:0016021	-	opiNOG05746;sordNOG10247	I	sp|Q9UUA6|DPP1_SCHPO Probable diacylglycerol pyrophosphate phosphatase 1 OS=Schizosaccharomyces pombe (strain 972 / ATCC 24843) GN=dpp1 PE=3 SV=1	PAP2 domain containing protein	18163175	-	GO:0016021//integral component of membrane;	-	-
CCM_08801	268.612	70.5179	-1.92946	8.69048e-07	5.03263e-05	NW_006271975.1	GO:0004309;GO:0005634;GO:0006798;GO:0005737	K01514	sordNOG06656;opiNOG06077	C	sp|O14094|PPX1_SCHPO Putative exopolyphosphatase OS=Schizosaccharomyces pombe (strain 972 / ATCC 24843) GN=SPAC2F3.11 PE=3 SV=1	exopolyphosphatase	18170806	GO:0006798//polyphosphate catabolic process;	GO:0005634//nucleus;GO:0005737//cytoplasm;	GO:0004309//exopolyphosphatase activity;	ko00230(Purine metabolism)
CCM_08999	210.335	64.845	-1.69762	9.61785e-07	5.50335e-05	NW_006271975.1	GO:0016021;GO:0022891;GO:0008643;GO:0055085	-	opiNOG15677;pleNOG06795	R	sp|Q9XIH7|PLT1_ARATH Putative polyol transporter 1 OS=Arabidopsis thaliana GN=PLT1 PE=3 SV=1	plastidic glucose transporter 4	18171003	GO:0008643//carbohydrate transport;GO:0055085//transmembrane transport;	GO:0016021//integral component of membrane;	-	-
CCM_03765	56.7518	7.87758	-2.84884	1.0778e-06	6.13068e-05	NW_006271971.1	-	-	-	-	-	hypothetical protein	18165788	-	-	-	-
CCM_06777	2768.87	1120.07	-1.30571	1.2191e-06	6.85335e-05	NW_006271973.1	GO:0006950;GO:0051286;GO:0032153	-	sordNOG10902	S	sp|O74782|YGBA_SCHPO Universal stress protein A family protein C25B2.10 OS=Schizosaccharomyces pombe (strain 972 / ATCC 24843) GN=SPBC25B2.10 PE=1 SV=1	universal stress protein family domain protein	18168788	GO:0006950//response to stress;	GO:0051286//cell tip;GO:0032153//cell division site;	-	-
CCM_04853	37.1696	1.28015	-4.85974	1.30096e-06	7.22897e-05	NW_006271971.1	-	-	-	-	-	hypothetical protein	18166874	-	-	-	-
CCM_02890	333.127	113.716	-1.55064	1.35941e-06	7.46299e-05	NW_006271970.1	GO:0055085;GO:0016021;GO:0008270;GO:0006351;GO:0030170;GO:0005634;GO:0008483;GO:0003677	-	opiNOG28587;opiNOG04000	SE	sp|O94562|YGD3_SCHPO Uncharacterized aminotransferase C1771.03c OS=Schizosaccharomyces pombe (strain 972 / ATCC 24843) GN=SPBC1773.03c PE=3 SV=1	aminotransferase, putative	18164917	GO:0055085//transmembrane transport;GO:0006351//transcription, DNA-templated;	GO:0016021//integral component of membrane;GO:0005634//nucleus;	GO:0008270//zinc ion binding;GO:0030170//pyridoxal phosphate binding;GO:0008483//transaminase activity;GO:0003677//DNA binding;	-
CCM_04709	5500.67	2272.3	-1.27545	1.40486e-06	7.58702e-05	NW_006271971.1	GO:0031225;GO:0016740;GO:0005975;GO:0005886	K22832	sordNOG09331;opiNOG06058;sorNOG03562	R	sp|B0XVI5|GEL4_ASPFC 1,3-beta-glucanosyltransferase gel4 OS=Neosartorya fumigata (strain CEA10 / CBS 144.89 / FGSC A1163) GN=gel4 PE=1 SV=1	1,3-beta-glucanosyltransferase, putative	18166730	GO:0005975//carbohydrate metabolic process;	GO:0031225//anchored component of membrane;GO:0005886//plasma membrane;	GO:0016740//transferase activity;	-
CCM_01128	2691.9	1102.25	-1.28818	1.5444e-06	8.24793e-05	NW_006271969.1	-	-	sordNOG09069;opiNOG10277	S	-	hypothetical protein	18163160	-	-	-	-
CCM_07174	1992.81	806.557	-1.30496	1.65544e-06	8.66125e-05	NW_006271973.1	GO:0045041;GO:0005524;GO:0042026;GO:0005759;GO:0051131;GO:0051087;GO:0051082	K04078	opiNOG37297	O	sp|O59804|CH10_SCHPO 10 kDa heat shock protein, mitochondrial OS=Schizosaccharomyces pombe (strain 972 / ATCC 24843) GN=hsp10 PE=1 SV=1	chaperonin	18169185	GO:0045041//protein import into mitochondrial intermembrane space;GO:0042026//protein refolding;GO:0051131//chaperone-mediated protein complex assembly;	GO:0005759//mitochondrial matrix;	GO:0005524//ATP binding;GO:0051087//chaperone binding;GO:0051082//unfolded protein binding;	-
CCM_02563	67.3646	11.1439	-2.59573	1.65783e-06	8.66125e-05	NW_006271970.1	-	-	-	-	-	hypothetical protein	18164590	-	-	-	-
CCM_08918	962.965	240.033	-2.00425	1.7511e-06	9.0502e-05	NW_006271975.1	GO:0008289;GO:0006810;GO:0005215	K08752	-	-	sp|Q9U5P1|FABP_LEPDS Fatty acid-binding protein OS=Lepidoglyphus destructor PE=1 SV=1	cellular retinoic acid binding protein	18170923	GO:0006810//transport;	-	GO:0008289//lipid binding;GO:0005215//transporter activity;	ko03320(PPAR signaling pathway)
CCM_05326	8061.9	2877.24	-1.48643	1.86132e-06	9.46711e-05	NW_006271972.1	GO:0006457;GO:0051082;GO:0005524	K04043	opiNOG00748;sorNOG00178;sordNOG04035	O	sp|Q5B0C0|HSP7M_EMENI Heat shock 70 kDa protein OS=Emericella nidulans (strain FGSC A4 / ATCC 38163 / CBS 112.46 / NRRL 194 / M139) GN=AN6010 PE=1 SV=1	heat shock 70 kDa protein	18167344	GO:0006457//protein folding;	-	GO:0051082//unfolded protein binding;GO:0005524//ATP binding;	ko05152(Tuberculosis);ko04212(Longevity regulating pathway - worm);ko03018(RNA degradation)
CCM_04692	2729.85	933.333	-1.54836	1.90058e-06	9.61593e-05	NW_006271971.1	GO:0005388;GO:0000329;GO:0006874;GO:0046872;GO:0070588;GO:0005524;GO:0016021	K01537	opiNOG01657;sordNOG09232	P	sp|Q9HDW7|ATC2_SCHPO Calcium-transporting ATPase 2 OS=Schizosaccharomyces pombe (strain 972 / ATCC 24843) GN=pmc1 PE=3 SV=1	P-type calcium ATPase, putative	18166714	GO:0006874//cellular calcium ion homeostasis;GO:0070588//calcium ion transmembrane transport;	GO:0000329//fungal-type vacuole membrane;GO:0016021//integral component of membrane;	GO:0005388//P-type calcium transporter activity;GO:0046872//metal ion binding;GO:0005524//ATP binding;	-
CCM_03477	163.724	47.3104	-1.79104	1.94397e-06	9.78342e-05	NW_006271970.1	GO:0005576;GO:0009405	-	necNOG14031	S	sp|Q90121|KP4T_UMV4 KP4 killer toxin OS=Ustilago maydis P4 virus GN=M2A PE=1 SV=1	Killer toxin, Kp4/SMK-like, core	18165503	GO:0009405//obsolete pathogenesis;	GO:0005576//extracellular region;	-	-
CCM_04115	451.94	162.343	-1.47709	1.95404e-06	9.78342e-05	NW_006271971.1	GO:0016491;GO:0010181;GO:0055114	K00354	opiNOG04856	C	sp|A8C7R3|EASA_CLAFS Probable inactive dehydrogenase easA OS=Claviceps fusiformis GN=easA PE=3 SV=1	NADH:flavin oxidoreductase/NADH oxidase family protein	18166138	GO:0055114//obsolete oxidation-reduction process;	-	GO:0016491//oxidoreductase activity;GO:0010181//FMN binding;	-
CCM_02535	584.029	22.2395	-4.71484	2.00454e-06	9.98428e-05	NW_006271970.1	GO:0008168;GO:0032259	-	eurotNOG10044;opiNOG53136	R	sp|Q0CCX8|GEDG_ASPTN Methyltransferase gedG OS=Aspergillus terreus (strain NIH 2624 / FGSC A1156) GN=gedG PE=3 SV=1	Methyltransferase type 11	18164562	GO:0032259//methylation;	-	GO:0008168//methyltransferase activity;	-
CCM_05594	5966.06	103.884	-5.84373	2.04848e-06	0.000101318	NW_006271972.1	-	-	sordNOG14962;opiNOG45933;opiNOG45017	S	-	glucose repressible protein Grg1	18167612	-	-	-	-
CCM_01149	1574.64	647.665	-1.2817	2.22704e-06	0.000108124	NW_006271969.1	GO:0055085;GO:0005215;GO:0016021	-	opiNOG06725;sordNOG08730	S	sp|C8V329|FCY2_EMENI Purine-cytosine permease fcyB OS=Emericella nidulans (strain FGSC A4 / ATCC 38163 / CBS 112.46 / NRRL 194 / M139) GN=fcyB PE=1 SV=1	purine-cytosine permease FCY21	18163181	GO:0055085//transmembrane transport;	GO:0016021//integral component of membrane;	GO:0005215//transporter activity;	-
CCM_08145	45.0883	5.14549	-3.13137	2.30568e-06	0.000111379	NW_006271974.1	GO:0055114;GO:0051213	-	opiNOG39354;sordNOG14377	RS	-	Glyoxalase/bleomycin resistance protein/dioxygenase	18170154	GO:0055114//obsolete oxidation-reduction process;	-	GO:0051213//dioxygenase activity;	-
CCM_01265	61.5655	0.639171	-6.58978	2.68909e-06	0.000127971	NW_006271969.1	GO:0016491;GO:0010181;GO:0055114	-	sorNOG00032;sordNOG10453;opiNOG27957	HSR	sp|Q01358|BLI3_NEUCR Protein bli-3 OS=Neurospora crassa (strain ATCC 24698 / 74-OR23-1A / CBS 708.71 / DSM 1257 / FGSC 987) GN=bli-3 PE=2 SV=1	protein bli-3	18163296	GO:0055114//obsolete oxidation-reduction process;	-	GO:0016491//oxidoreductase activity;GO:0010181//FMN binding;	-
CCM_02346	902.01	359.034	-1.32902	2.80767e-06	0.000132956	NW_006271970.1	GO:0055085;GO:0016021	-	sorNOG06478;sordNOG09361	R	sp|O94343|YHMA_SCHPO Uncharacterized MFS-type transporter C1271.10c OS=Schizosaccharomyces pombe (strain 972 / ATCC 24843) GN=SPBC1271.10c PE=1 SV=1	MFS transporter	18164373	GO:0055085//transmembrane transport;	GO:0016021//integral component of membrane;	-	-
CCM_00991	768.716	306.343	-1.3273	3.17382e-06	0.000148829	NW_006271969.1	GO:0008152;GO:0016846	-	sordNOG13227;opiNOG31876	S	-	Glutathione-dependent formaldehyde-activating, GFA	18163024	GO:0008152//metabolic process;	-	GO:0016846//carbon-sulfur lyase activity;	-
CCM_00675	1508.47	622.711	-1.27645	3.19753e-06	0.000149213	NW_006271969.1	GO:0016021;GO:0055085	-	KOG2615;opiNOG04434	R	sp|P25351|YCR3_YEAST Uncharacterized membrane protein YCR023C OS=Saccharomyces cerevisiae (strain ATCC 204508 / S288c) GN=YCR023C PE=1 SV=2	MFS transporter	18162709	GO:0055085//transmembrane transport;	GO:0016021//integral component of membrane;	-	-
CCM_00834	2504.55	1007.76	-1.3134	3.31754e-06	0.000154066	NW_006271969.1	-	-	opiNOG33303;treNOG09656	S	-	hypothetical protein	18162868	-	-	-	-
CCM_09488	1698.39	624.546	-1.44329	3.52439e-06	0.000162105	NW_006271977.1	GO:0005524;GO:0004672;GO:0006468	-	opiNOG56575	T	-	Protein kinase-like domain	18171490	GO:0006468//protein phosphorylation;	-	GO:0005524//ATP binding;GO:0004672//protein kinase activity;	-
CCM_08824	206.859	42.2822	-2.29053	3.8889e-06	0.000178019	NW_006271975.1	GO:0016021	-	sordNOG07846;NOG139032;opiNOG02463	TS	-	hypothetical protein	18170829	-	GO:0016021//integral component of membrane;	-	-
CCM_01942	636.616	166.445	-1.93538	3.99984e-06	0.0001798	NW_006271970.1	GO:0016491;GO:0008270;GO:0055114	-	sordNOG10195;opiNOG06785	CQ	sp|P54006|TOXD_COCCA Protein TOXD OS=Cochliobolus carbonum GN=TOXD PE=3 SV=1	alcohol dehydrogenase, putative	18163971	GO:0055114//obsolete oxidation-reduction process;	-	GO:0016491//oxidoreductase activity;GO:0008270//zinc ion binding;	-
CCM_08305	1011.18	413.136	-1.29135	4.00263e-06	0.0001798	NW_006271975.1	GO:0016788	K01114	sordNOG15265	I	sp|Q9RGS8|PHLN_BURPS Non-hemolytic phospholipase C OS=Burkholderia pseudomallei (strain K96243) GN=plcN PE=1 SV=2	non-hemolytic phospholipase C precursor, putative	18170313	-	-	GO:0016788//hydrolase activity, acting on ester bonds;	ko04919(Thyroid hormone signaling pathway);ko02024(Quorum sensing);ko00565(Ether lipid metabolism);ko00564(Glycerophospholipid metabolism);ko00562(Inositol phosphate metabolism)
CCM_09279	1444.34	604.028	-1.25772	4.19632e-06	0.000187624	NW_006271976.1	-	K09705	sordNOG13133;opiNOG34176	SR	-	cupin superfamily protein	18171282	-	-	-	-
CCM_04411	608.99	237.946	-1.35578	4.26638e-06	0.000189291	NW_006271971.1	GO:0016614;GO:0050660;GO:0055114	-	sordNOG09786;COG0277;opiNOG18276	RC	sp|A1CFM2|PATO_ASPCL FAD-linked oxidoreductase patO OS=Aspergillus clavatus (strain ATCC 1007 / CBS 513.65 / DSM 816 / NCTC 3887 / NRRL 1) GN=patO PE=1 SV=1	isoamyl alcohol oxidase, putative	18166434	GO:0055114//obsolete oxidation-reduction process;	-	GO:0016614//oxidoreductase activity, acting on CH-OH group of donors;GO:0050660//flavin adenine dinucleotide binding;	-
CCM_00283	309.586	109.521	-1.49914	4.27297e-06	0.000189291	NW_006271969.1	GO:0016757	-	opiNOG14597;sordNOG06304	S	-	hypothetical protein	18162318	-	-	GO:0016757//glycosyltransferase activity;	-
CCM_02422	429.978	163.212	-1.39751	4.51201e-06	0.000198963	NW_006271970.1	GO:0016021;GO:0055085	-	sordNOG04101	R	sp|O59726|FNX2_SCHPO Vacuolar membrane amino acid uptake transporter fnx2 OS=Schizosaccharomyces pombe (strain 972 / ATCC 24843) GN=fnx2 PE=3 SV=1	MFS multidrug transporter, putative	18164449	GO:0055085//transmembrane transport;	GO:0016021//integral component of membrane;	-	-
CCM_08383	427.609	162.932	-1.39203	4.66315e-06	0.000204689	NW_006271975.1	GO:0016021	-	-	-	-	hypothetical protein	18170391	-	GO:0016021//integral component of membrane;	-	-
CCM_07027	69.4187	13.5759	-2.35428	4.70898e-06	0.000205761	NW_006271973.1	-	-	-	-	-	hypothetical protein	18169038	-	-	-	-
CCM_08067	542.304	193.757	-1.48485	4.93809e-06	0.000214796	NW_006271974.1	GO:0016884	-	sorNOG08092;opiNOG12593	JS	sp|Q5V2G6|GATA_HALMA Glutamyl-tRNA(Gln) amidotransferase subunit A OS=Haloarcula marismortui (strain ATCC 43049 / DSM 3752 / JCM 8966 / VKM B-1809) GN=gatA PE=3 SV=1	amidase	18170076	-	-	GO:0016884//carbon-nitrogen ligase activity, with glutamine as amido-N-donor;	-
CCM_08416	92.0574	21.5364	-2.09576	5.10591e-06	0.000221095	NW_006271975.1	-	-	-	-	-	hypothetical protein	18170424	-	-	-	-
CCM_06183	323.911	73.9239	-2.13149	5.49949e-06	0.000236012	NW_006271972.1	GO:0004527;GO:0090305;GO:0004519	K19619	agaNOG06472;magNOG12728;sordNOG15527;opiNOG29302	RS	-	Endonuclease/exonuclease/phosphatase	18168198	GO:0090305//nucleic acid phosphodiester bond hydrolysis;	-	GO:0004527//exonuclease activity;GO:0004519//endonuclease activity;	-
CCM_07859	928.087	382.267	-1.27968	5.64243e-06	0.00024107	NW_006271974.1	GO:0050085;GO:0055114	K17742	opiNOG12282;COG1028	IQ	sp|Q8NK50|MTDH_HYPJE NADP-dependent mannitol dehydrogenase OS=Hypocrea jecorina GN=lxr1 PE=1 SV=1	L-xylulose reductase	18169869	GO:0055114//obsolete oxidation-reduction process;	-	GO:0050085//mannitol 2-dehydrogenase (NADP+) activity;	ko00051(Fructose and mannose metabolism)
CCM_01941	638.522	107.56	-2.56959	5.91987e-06	0.000250695	NW_006271970.1	GO:0050661;GO:0016021;GO:0055114;GO:0050660;GO:0004499	-	opiNOG11270	R	sp|Q9I3H5|BVMO_PSEAE Baeyer-Villiger monooxygenase OS=Pseudomonas aeruginosa (strain ATCC 15692 / DSM 22644 / CIP 104116 / JCM 14847 / LMG 12228 / 1C / PRS 101 / PAO1) GN=PA1538 PE=1 SV=1	monooxygenase, putative	18163970	GO:0055114//obsolete oxidation-reduction process;	GO:0016021//integral component of membrane;	GO:0050661//NADP binding;GO:0050660//flavin adenine dinucleotide binding;GO:0004499//N,N-dimethylaniline monooxygenase activity;	-
CCM_07209	421.244	98.3043	-2.09933	6.46344e-06	0.000267815	NW_006271973.1	-	-	NOG15125	S	sp|O34780|YOBF_BACSU Uncharacterized protein YobF OS=Bacillus subtilis (strain 168) GN=yobF PE=4 SV=1	RADC family protein	18169220	-	-	-	-
CCM_08062	28.7542	1.73061	-4.05442	6.82758e-06	0.000280485	NW_006271974.1	-	-	-	-	-	hypothetical protein	18170071	-	-	-	-
CCM_07856	296.843	107.782	-1.46158	7.02972e-06	0.000287561	NW_006271974.1	GO:0005524	K08900	COG0465;opiNOG48955	O	sp|Q9P6Q3|BCS1_SCHPO Probable mitochondrial chaperone bcs1 OS=Schizosaccharomyces pombe (strain 972 / ATCC 24843) GN=SPAC644.07 PE=2 SV=1	mitochondrial chaperone bcs1	18169866	-	-	GO:0005524//ATP binding;	-
CCM_03479	109.411	28.3385	-1.94892	7.62273e-06	0.000309187	NW_006271970.1	-	-	eurotNOG09976;opiNOG41460;opiNOG61781	RS	-	hypothetical protein	18165505	-	-	-	-
CCM_04426	349.035	131.947	-1.40341	8.03948e-06	0.000322015	NW_006271971.1	GO:0031225;GO:0016740;GO:0005886;GO:0005975	K22832	sordNOG08489;sorNOG06835	R	sp|P56092|EPD1_CANMA Protein EPD1 OS=Candida maltosa GN=EPD1 PE=3 SV=1	1,3-beta-glucanosyltransferase, putative	18166449	GO:0005975//carbohydrate metabolic process;	GO:0031225//anchored component of membrane;GO:0005886//plasma membrane;	GO:0016740//transferase activity;	-
CCM_03042	1498.17	640.963	-1.22489	8.81547e-06	0.000351631	NW_006271970.1	GO:0031314;GO:0009408;GO:0000002;GO:0006515;GO:0032781;GO:0042026;GO:0051082;GO:0031072;GO:0005524;GO:0001671;GO:0005759;GO:0046872;GO:0006458	K03686	opiNOG16081;sordNOG07576	O	sp|C8V213|MDJ1_EMENI DnaJ homolog 1, mitochondrial OS=Emericella nidulans (strain FGSC A4 / ATCC 38163 / CBS 112.46 / NRRL 194 / M139) GN=AN10778 PE=3 SV=1	mitochondrial DnaJ chaperone (Mdj1), putative	18165069	GO:0009408//response to heat;GO:0000002//mitochondrial genome maintenance;GO:0006515//protein quality control for misfolded or incompletely synthesized proteins;GO:0032781//positive regulation of ATP-dependent activity;GO:0042026//protein refolding;GO:0006458//'de novo' protein folding;	GO:0031314//extrinsic component of mitochondrial inner membrane;GO:0005759//mitochondrial matrix;	GO:0051082//unfolded protein binding;GO:0031072//heat shock protein binding;GO:0005524//ATP binding;GO:0001671//ATPase activator activity;GO:0046872//metal ion binding;	-
CCM_06054	1080.09	325.05	-1.73242	1.02282e-05	0.00040132	NW_006271972.1	-	-	opiNOG15098;sordNOG08989;opiNOG22398	S	sp|Q9UUA7|YHAH_SCHPO UPF0590 protein C409.17c OS=Schizosaccharomyces pombe (strain 972 / ATCC 24843) GN=SPBC409.17c PE=3 SV=1	hypothetical protein	18168069	-	-	-	-
CCM_06109	24.2664	0.958757	-4.66165	1.14247e-05	0.000442845	NW_006271972.1	-	-	opiNOG34294	S	-	Peroxiredoxin, OsmC-like protein	18168124	-	-	-	-
CCM_03384	112.35	17.2988	-2.69925	1.17557e-05	0.000453846	NW_006271970.1	-	-	-	-	-	hypothetical protein	18165410	-	-	-	-
CCM_05603	928.515	288.385	-1.68693	1.18827e-05	0.00045642	NW_006271972.1	GO:0055085;GO:0016021	-	opiNOG07106;sorNOG00663	R	sp|Q870L2|MIRB_EMENI Siderophore iron transporter mirB OS=Emericella nidulans (strain FGSC A4 / ATCC 38163 / CBS 112.46 / NRRL 194 / M139) GN=mirB PE=3 SV=1	siderophore iron transporter	18167621	GO:0055085//transmembrane transport;	GO:0016021//integral component of membrane;	-	-
CCM_00968	976.792	413.02	-1.24184	1.19228e-05	0.00045642	NW_006271969.1	GO:0036246;GO:0098849;GO:0036249;GO:0071627;GO:0005524;GO:0071996;GO:0044604	K23329	opiNOG02554	Q	sp|Q2UPC0|ACLQ_ASPOR ABC transporter aclQ OS=Aspergillus oryzae (strain ATCC 42149 / RIB 40) GN=aclQ PE=3 SV=1	heavy metal tolerance protein precursor	18163001	GO:0036246//phytochelatin 2 import into vacuole;GO:0098849//cellular detoxification of cadmium ion;GO:0036249//cadmium ion import into vacuole;GO:0071996//glutathione transmembrane import into vacuole;	GO:0071627//integral component of fungal-type vacuolar membrane;	GO:0005524//ATP binding;GO:0044604//ABC-type phytochelatin transporter activity;	-
CCM_03445	7923.5	3300.65	-1.26339	1.19648e-05	0.00045642	NW_006271970.1	GO:0055085;GO:0042626;GO:0005524;GO:0016021	K05665	COG1132;opiNOG11164	VQ	sp|Q8J2Q1|FUM19_GIBM7 ABC transporter FUM19 OS=Gibberella moniliformis (strain M3125 / FGSC 7600) GN=FUM19 PE=2 SV=1	multidrug resistance-associated protein, putative	18165471	GO:0055085//transmembrane transport;	GO:0016021//integral component of membrane;	GO:0042626//ATPase-coupled transmembrane transporter activity;GO:0005524//ATP binding;	ko05206(MicroRNAs in cancer);ko04977(Vitamin digestion and absorption);ko04071(Sphingolipid signaling pathway);ko02010(ABC transporters);ko01523(Antifolate resistance)
CCM_02560	7886.18	3541.88	-1.15481	1.21635e-05	0.000462165	NW_006271970.1	GO:0004252;GO:0006508	K01279	opiNOG17772	O	sp|Q70J59|SED2_ASPFU Tripeptidyl-peptidase sed2 OS=Neosartorya fumigata (strain ATCC MYA-4609 / Af293 / CBS 101355 / FGSC A1100) GN=sed2 PE=1 SV=1	tripeptidyl peptidase	18164587	GO:0006508//proteolysis;	-	GO:0004252//serine-type endopeptidase activity;	ko04142(Lysosome)
CCM_03013	1250.39	547.337	-1.19188	1.30145e-05	0.000492551	NW_006271970.1	-	-	opiNOG73078;sordNOG06706	S	-	hypothetical protein	18165040	-	-	-	-
CCM_01055	315.005	7.70941	-5.35261	1.39344e-05	0.000519248	NW_006271969.1	-	-	opiNOG43883	S	-	hypothetical protein	18163088	-	-	-	-
CCM_08262	557.169	89.8878	-2.63192	1.44501e-05	0.000534263	NW_006271975.1	GO:0016705;GO:0020037;GO:0005506;GO:0016021;GO:0004497;GO:0055114	K21296	opiNOG15076;sordNOG06490	Q	sp|A0JJT9|TENB_BEABA Cytochrome P450 monooxygenase tenB OS=Beauveria bassiana GN=tenB PE=1 SV=1	alcohol dehydrogenase, putative	18170270	GO:0055114//obsolete oxidation-reduction process;	GO:0016021//integral component of membrane;	GO:0016705//oxidoreductase activity, acting on paired donors, with incorporation or reduction of molecular oxygen;GO:0020037//heme binding;GO:0005506//iron ion binding;GO:0004497//monooxygenase activity;	-
CCM_01369	405.159	152.664	-1.40812	1.46411e-05	0.000539252	NW_006271969.1	GO:0016301;GO:0016310	-	sordNOG08172;hypNOG00955	S	-	hypothetical protein	18163400	GO:0016310//phosphorylation;	-	GO:0016301//kinase activity;	-
CCM_06020	536.596	147.463	-1.86349	1.4763e-05	0.000541665	NW_006271972.1	GO:0004190;GO:0016021;GO:0006508	-	sordNOG06521;sorNOG06357	O	sp|Q8NKB6|OPSB_ASPOR Probable aspartic-type endopeptidase opsB OS=Aspergillus oryzae (strain ATCC 42149 / RIB 40) GN=opsB PE=2 SV=1	Peptidase A1	18168038	GO:0006508//proteolysis;	GO:0016021//integral component of membrane;	GO:0004190//aspartic-type endopeptidase activity;	-
CCM_06987	924.087	396.291	-1.22147	1.56517e-05	0.000572091	NW_006271973.1	GO:0016614;GO:0050660;GO:0055114	-	opiNOG16284;opiNOG24385;sordNOG10995;opiNOG22340	R	sp|G3Y424|YANF_ASPNA FAD-dependent monooxygenase yanF OS=Aspergillus niger (strain ATCC 1015 / CBS 113.46 / FGSC A1144 / LSHB Ac4 / NCTC 3858a / NRRL 328 / USDA 3528.7) GN=yanF PE=1 SV=1	FAD binding domain protein	18168998	GO:0055114//obsolete oxidation-reduction process;	-	GO:0016614//oxidoreductase activity, acting on CH-OH group of donors;GO:0050660//flavin adenine dinucleotide binding;	-
CCM_03644	102.492	7.76906	-3.72162	1.61294e-05	0.0005851	NW_006271971.1	-	-	-	-	-	hypothetical protein	18165670	-	-	-	-
CCM_00451	7162.55	1926.08	-1.89481	1.72156e-05	0.000618653	NW_006271969.1	GO:0008270;GO:0016491;GO:0055114	K13953	opiNOG19540	Q	sp|P07754|ADH3_EMENI Alcohol dehydrogenase 3 OS=Emericella nidulans (strain FGSC A4 / ATCC 38163 / CBS 112.46 / NRRL 194 / M139) GN=alcC PE=3 SV=1	alcohol dehydrogenase	18162486	GO:0055114//obsolete oxidation-reduction process;	-	GO:0008270//zinc ion binding;GO:0016491//oxidoreductase activity;	ko00982(Drug metabolism - cytochrome P450);ko00980(Metabolism of xenobiotics by cytochrome P450);ko00830(Retinol metabolism);ko00626(Naphthalene degradation);ko00625(Chloroalkane and chloroalkene degradation);ko00620(Pyruvate metabolism);ko00350(Tyrosine metabolism);ko00071(Fatty acid degradation);ko00010(Glycolysis / Gluconeogenesis)
CCM_03596	655.746	177.064	-1.88886	1.72474e-05	0.000618653	NW_006271970.1	GO:0008237;GO:0006508	-	euNOG02355;sorNOG03848;opiNOG11422;opiNOG10620	WO	sp|A4RGT4|MEP1_MAGO7 Extracellular metalloprotease MGG_08041 OS=Magnaporthe oryzae (strain 70-15 / ATCC MYA-4617 / FGSC 8958) GN=MGG_08041 PE=3 SV=1	metalloprotease 1	18165622	GO:0006508//proteolysis;	-	GO:0008237//metallopeptidase activity;	-
CCM_05340	365.16	64.26	-2.50654	1.78897e-05	0.000639308	NW_006271972.1	GO:0016021;GO:0055085	-	opiNOG06381;sordNOG04945	R	sp|P25351|YCR3_YEAST Uncharacterized membrane protein YCR023C OS=Saccharomyces cerevisiae (strain ATCC 204508 / S288c) GN=YCR023C PE=1 SV=2	MFS multidrug transporter, putative	18167358	GO:0055085//transmembrane transport;	GO:0016021//integral component of membrane;	-	-
CCM_00863	875.923	380.781	-1.20184	2.11273e-05	0.000748639	NW_006271969.1	GO:0001405;GO:0005759;GO:0051087;GO:0030150;GO:0000774;GO:0042026;GO:0050790;GO:0042803	K03687	opiNOG23566;sordNOG10104	O	sp|Q9P5U4|GRPE_NEUCR GrpE protein homolog, mitochondrial OS=Neurospora crassa (strain ATCC 24698 / 74-OR23-1A / CBS 708.71 / DSM 1257 / FGSC 987) GN=grpe PE=3 SV=1	mitochondrial co-chaperone GrpE	18162897	GO:0030150//protein import into mitochondrial matrix;GO:0042026//protein refolding;GO:0050790//regulation of catalytic activity;	GO:0001405//PAM complex, Tim23 associated import motor;GO:0005759//mitochondrial matrix;	GO:0051087//chaperone binding;GO:0000774//adenyl-nucleotide exchange factor activity;GO:0042803//protein homodimerization activity;	-
CCM_08175	35.6468	3.97223	-3.16575	2.15609e-05	0.000759212	NW_006271974.1	-	-	-	-	-	hypothetical protein	18170184	-	-	-	-
CCM_02562	36868.6	17051.6	-1.11249	2.25008e-05	0.000784385	NW_006271970.1	GO:0006508;GO:0004252	K01279	opiNOG14582;opiNOG17772	O	sp|Q70GH4|SED3_ASPFU Tripeptidyl-peptidase sed3 OS=Neosartorya fumigata (strain ATCC MYA-4609 / Af293 / CBS 101355 / FGSC A1100) GN=sed3 PE=1 SV=1	tripeptidyl peptidase	18164589	GO:0006508//proteolysis;	-	GO:0004252//serine-type endopeptidase activity;	ko04142(Lysosome)
CCM_02497	110.705	31.2791	-1.82346	2.26068e-05	0.000784546	NW_006271970.1	-	-	sordNOG04094;opiNOG39363;opiNOG31379	S	-	galactose-proton symport, putative	18164524	-	-	-	-
CCM_07873	117.356	35.5345	-1.7236	2.2929e-05	0.000792866	NW_006271974.1	-	-	euNOG03171;sorNOG04125;opiNOG15198	S	-	C6 finger domain protein, putative	18169883	-	-	-	-
CCM_08892	38.1619	1.91842	-4.31414	2.46753e-05	0.000844141	NW_006271975.1	GO:0016021	-	necNOG08223;opiNOG27391;hypNOG11573	S	-	hypothetical protein	18170897	-	GO:0016021//integral component of membrane;	-	-
CCM_09019	395.144	161.54	-1.29048	2.52767e-05	0.000858606	NW_006271975.1	-	-	opiNOG43263;opiNOG44308;sordNOG14422	R	sp|Q9VFP2|RDX_DROME Protein roadkill OS=Drosophila melanogaster GN=rdx PE=1 SV=2	BTB/POZ domain protein	18171023	-	-	-	-
CCM_04345	1925.99	875.975	-1.13664	2.5524e-05	0.00086395	NW_006271971.1	GO:0032259;GO:0008168	-	sordNOG09951	R	sp|G3XRG4|LAEA_ASPNA Secondary metabolism regulator laeA OS=Aspergillus niger (strain ATCC 1015 / CBS 113.46 / FGSC A1144 / LSHB Ac4 / NCTC 3858a / NRRL 328 / USDA 3528.7) GN=laeA PE=3 SV=1	TAM domain methyltransferase, putative	18166368	GO:0032259//methylation;	-	GO:0008168//methyltransferase activity;	-
CCM_03160	1127.59	497.891	-1.17934	2.57924e-05	0.000869975	NW_006271970.1	GO:0004190;GO:0006508	-	sordNOG04158	O	sp|D4AIS3|OPSB_ARTBC Probable aspartic-type endopeptidase OPSB OS=Arthroderma benhamiae (strain ATCC MYA-4681 / CBS 112371) GN=OPSB PE=3 SV=1	candidapepsin-4 precursor	18165187	GO:0006508//proteolysis;	-	GO:0004190//aspartic-type endopeptidase activity;	-
CCM_07427	330.78	131.929	-1.32611	2.60639e-05	0.000876055	NW_006271974.1	GO:0005634;GO:0000981;GO:0006357;GO:0008270	-	sordNOG06542	S	-	Fungal transcriptional regulatory protein	18169438	GO:0006357//regulation of transcription by RNA polymerase II;	GO:0005634//nucleus;	GO:0000981//DNA-binding transcription factor activity, RNA polymerase II-specific;GO:0008270//zinc ion binding;	-
CCM_07109	1019.05	414.193	-1.29885	2.65263e-05	0.000885733	NW_006271973.1	GO:0016787	-	opiNOG01185	R	sp|Q9SR79|PPA16_ARATH Probable inactive purple acid phosphatase 16 OS=Arabidopsis thaliana GN=PAP16 PE=2 SV=1	Metallophosphoesterase	18169120	-	-	GO:0016787//hydrolase activity;	-
CCM_04196	660.673	280.939	-1.23368	2.65361e-05	0.000885733	NW_006271971.1	GO:0005743;GO:0055085;GO:0016021;GO:0006631;GO:0005476	K15109	opiNOG03838;sordNOG04878	C	sp|Q12289|CRC1_YEAST Mitochondrial carnitine carrier OS=Saccharomyces cerevisiae (strain ATCC 204508 / S288c) GN=CRC1 PE=1 SV=1	carnitine/acylcarnitine carrier protein	18166219	GO:0055085//transmembrane transport;GO:0006631//fatty acid metabolic process;	GO:0005743//mitochondrial inner membrane;GO:0016021//integral component of membrane;	GO:0005476//carnitine:acyl carnitine antiporter activity;	ko04714(Thermogenesis)
CCM_06467	405.277	168.539	-1.26583	2.85776e-05	0.000944044	NW_006271973.1	-	-	-	-	-	hypothetical protein	18168481	-	-	-	-
CCM_08019	79.4152	0.319586	-7.95707	3.03151e-05	0.000994605	NW_006271974.1	-	-	opiNOG21897;opiNOG31821;opiNOG56372	RS	sp|Q1ERH9|CITA_MONPU Esterase mpl1 OS=Monascus purpureus GN=mpl1 PE=1 SV=1	citrinin biosynthesis oxydoreductase CtnB	18170028	-	-	-	-
CCM_08543	11366	5320.39	-1.09512	3.07349e-05	0.00100495	NW_006271975.1	-	-	sordNOG12208;sordNOG12845	O	sp|Q11118|WOS2_SCHPO Protein wos2 OS=Schizosaccharomyces pombe (strain 972 / ATCC 24843) GN=wos2 PE=2 SV=1	Hsp90 binding co-chaperone Sba1	18170550	-	-	-	-
CCM_02588	111.643	27.9193	-1.99956	3.11846e-05	0.00101619	NW_006271970.1	-	-	necNOG05211;hypNOG04353	S	-	hypothetical protein	18164615	-	-	-	-
CCM_04511	25646.4	10464.4	-1.29327	3.22049e-05	0.00104495	NW_006271971.1	GO:0016491;GO:0055114	K00306	opiNOG31274	R	sp|O43029|FAP1_SCHPO L-pipecolate oxidase OS=Schizosaccharomyces pombe (strain 972 / ATCC 24843) GN=fap1 PE=1 SV=1	sarcosine oxidase	18166534	GO:0055114//obsolete oxidation-reduction process;	-	GO:0016491//oxidoreductase activity;	ko04146(Peroxisome);ko00310(Lysine degradation);ko00260(Glycine, serine and threonine metabolism)
CCM_02569	31855	15045.7	-1.08217	3.24735e-05	0.00104754	NW_006271970.1	GO:0055085;GO:0016021	-	opiNOG15712;opiNOG24914;sordNOG08860;opiNOG03645	R	sp|Q9USN4|YJA1_SCHPO Uncharacterized transporter C1529.01 OS=Schizosaccharomyces pombe (strain 972 / ATCC 24843) GN=SPCC1529.01 PE=3 SV=2	MFS multidrug transporter	18164596	GO:0055085//transmembrane transport;	GO:0016021//integral component of membrane;	-	-
CCM_01825	67.0818	15.1507	-2.14653	3.46354e-05	0.00109884	NW_006271969.1	GO:0004252;GO:0006508	K01279	opiNOG19608;necNOG14241;hypNOG10517	OBSK	sp|Q70GH4|SED3_ASPFU Tripeptidyl-peptidase sed3 OS=Neosartorya fumigata (strain ATCC MYA-4609 / Af293 / CBS 101355 / FGSC A1100) GN=sed3 PE=1 SV=1	tripeptidyl peptidase SED3	18163855	GO:0006508//proteolysis;	-	GO:0004252//serine-type endopeptidase activity;	ko04142(Lysosome)
CCM_08817	6822.65	3208.78	-1.08831	3.73102e-05	0.00116449	NW_006271975.1	GO:0016021	-	opiNOG11918;sordNOG08152;sorNOG02286	SR	-	hypothetical protein	18170822	-	GO:0016021//integral component of membrane;	-	-
CCM_07071	501.205	217.889	-1.20181	3.9268e-05	0.00122163	NW_006271973.1	GO:0006508;GO:0004190	-	sorNOG05278;sordNOG12315;hypNOG13642	O	sp|P00796|RENI2_MOUSE Renin-2 OS=Mus musculus GN=Ren2 PE=1 SV=1	pregnancy-associated glycoprotein 2 precursor	18169082	GO:0006508//proteolysis;	-	GO:0004190//aspartic-type endopeptidase activity;	-
CCM_02217	1019.93	435.829	-1.22664	4.02777e-05	0.00124498	NW_006271970.1	GO:0005777;GO:0008413;GO:0006281	-	opiNOG17811;sordNOG10571	L	sp|Q12524|PCD1_YEAST Peroxisomal coenzyme A diphosphatase 1, peroxisomal OS=Saccharomyces cerevisiae (strain ATCC 204508 / S288c) GN=PCD1 PE=1 SV=1	NUDIX domain protein	18164244	GO:0006281//DNA repair;	GO:0005777//peroxisome;	GO:0008413//8-oxo-7,8-dihydroguanosine triphosphate pyrophosphatase activity;	-
CCM_04325	554.674	130.313	-2.08966	4.10126e-05	0.0012596	NW_006271971.1	GO:0006855;GO:0016021;GO:0015238;GO:0015297	K03327	sordNOG06366	S	sp|Q9USK3|YJ2D_SCHPO Uncharacterized transporter C4B3.13 OS=Schizosaccharomyces pombe (strain 972 / ATCC 24843) GN=SPCC4B3.13 PE=3 SV=1	MATE efflux family protein subfamily, putative	18166348	GO:0006855//xenobiotic transmembrane transport;	GO:0016021//integral component of membrane;	GO:0015297//antiporter activity;	-
CCM_08301	456.944	194.589	-1.23158	4.12709e-05	0.0012635	NW_006271975.1	GO:0006108;GO:0004471;GO:0051287;GO:0046872;GO:0055114	K00027	COG0281;opiNOG04071	C	sp|P36013|MAOM_YEAST NAD-dependent malic enzyme, mitochondrial OS=Saccharomyces cerevisiae (strain ATCC 204508 / S288c) GN=MAE1 PE=1 SV=1	malate dehydrogenase, putative	18170309	GO:0006108//malate metabolic process;GO:0055114//obsolete oxidation-reduction process;	-	GO:0004471//malate dehydrogenase (decarboxylating) (NAD+) activity;GO:0051287//NAD binding;GO:0046872//metal ion binding;	ko02020(Two-component system);ko00620(Pyruvate metabolism)
CCM_00162	528.616	48.7336	-3.43923	4.25273e-05	0.00129372	NW_006271969.1	-	-	-	-	-	hypothetical protein	18162197	-	-	-	-
CCM_05137	160.712	56.0809	-1.51889	4.28531e-05	0.00129952	NW_006271972.1	-	-	-	-	-	hypothetical protein	18167157	-	-	-	-
CCM_00046	95.3461	27.0754	-1.81619	4.60015e-05	0.00138625	NW_006271969.1	GO:0005524	-	sorNOG01842;COG0464;sordNOG06480;opiNOG02983	LO	sp|Q04540|CBXXP_CUPNH Protein CbxX, plasmid OS=Cupriavidus necator (strain ATCC 17699 / H16 / DSM 428 / Stanier 337) GN=cbxXP PE=3 SV=1	AAA family ATPase, putative	18162081	-	-	GO:0005524//ATP binding;	-
CCM_03124	3411.56	1621.5	-1.0731	4.61696e-05	0.00138696	NW_006271970.1	GO:0005634;GO:0000981;GO:0008270;GO:0003677;GO:0006357	-	opiNOG20525;sordNOG06505	S	sp|A0A0D2YFZ7|FUB12_FUSO4 Fusaric acid cluster transcription factor FUB12 OS=Fusarium oxysporum f. sp. lycopersici (strain 4287 / CBS 123668 / FGSC 9935 / NRRL 34936) GN=FUB12 PE=1 SV=1	Fungal transcriptional regulatory protein	18165151	GO:0006357//regulation of transcription by RNA polymerase II;	GO:0005634//nucleus;	GO:0000981//DNA-binding transcription factor activity, RNA polymerase II-specific;GO:0008270//zinc ion binding;GO:0003677//DNA binding;	-
CCM_04284	6844.74	2820.68	-1.27895	4.71675e-05	0.00140814	NW_006271971.1	GO:0005215;GO:0055085;GO:0016021	-	sordNOG07241;opiNOG03856;sorNOG03296	R	sp|P25351|YCR3_YEAST Uncharacterized membrane protein YCR023C OS=Saccharomyces cerevisiae (strain ATCC 204508 / S288c) GN=YCR023C PE=1 SV=2	MFS transporter	18166307	GO:0055085//transmembrane transport;	GO:0016021//integral component of membrane;	GO:0005215//transporter activity;	-
CCM_07853	851.204	381.885	-1.15637	4.74602e-05	0.00141249	NW_006271974.1	-	-	NOG47970;pleNOG07882	S	-	hypothetical protein	18169863	-	-	-	-
CCM_04506	6201.26	2966.62	-1.06374	4.89409e-05	0.00145206	NW_006271971.1	-	-	opiNOG56942	S	sp|Q7RX33|EGT1_NEUCR Ergothioneine biosynthesis protein 1 OS=Neurospora crassa (strain ATCC 24698 / 74-OR23-1A / CBS 708.71 / DSM 1257 / FGSC 987) GN=egt-1 PE=1 SV=3	DUF323 domain-containing protein	18166529	-	-	-	-
CCM_08083	775.773	348.284	-1.15537	4.94448e-05	0.00145801	NW_006271974.1	-	-	opiNOG58850	S	-	hypothetical protein	18170092	-	-	-	-
CCM_03803	26.0759	1.96295	-3.73162	5.13678e-05	0.00151009	NW_006271971.1	-	-	-	-	-	hypothetical protein	18165826	-	-	-	-
CCM_06910	1009.94	460.69	-1.1324	5.17075e-05	0.00151544	NW_006271973.1	-	-	opiNOG15863;sordNOG10568;sorNOG08003	S	-	Hsp70 family chaperone	18168921	-	-	-	-
CCM_00940	1094.51	294.504	-1.89393	5.32079e-05	0.00154996	NW_006271969.1	GO:0016021	K20815	NOG62480;opiNOG29361;sordNOG13194	S	sp|Q9URV4|YBL7_SCHPO Uncharacterized protein C106.07c OS=Schizosaccharomyces pombe (strain 972 / ATCC 24843) GN=SPBC106.07c PE=4 SV=1	hypothetical protein	18162973	-	GO:0016021//integral component of membrane;	-	-
CCM_05006	664.905	297.268	-1.16138	5.48963e-05	0.00158474	NW_006271971.1	GO:0005743;GO:0016021;GO:0006515;GO:0004222	K23010	sordNOG06899	O	sp|Q9P7G4|OMA1_SCHPO Mitochondrial metalloendopeptidase OMA1 OS=Schizosaccharomyces pombe (strain 972 / ATCC 24843) GN=oma1 PE=3 SV=1	mitochondrial metalloendopeptidase OMA1	18167026	GO:0006515//protein quality control for misfolded or incompletely synthesized proteins;	GO:0005743//mitochondrial inner membrane;GO:0016021//integral component of membrane;	GO:0004222//metalloendopeptidase activity;	ko05017(Spinocerebellar ataxia)
CCM_00673	170.392	56.5244	-1.59191	5.99163e-05	0.00170913	NW_006271969.1	GO:0008080	-	NOG65997	R	sp|P96579|YDAF_BACSU Putative ribosomal N-acetyltransferase YdaF OS=Bacillus subtilis (strain 168) GN=ydaF PE=1 SV=1	acetyltransferase	18162707	-	-	GO:0008080//N-acetyltransferase activity;	-
CCM_02558	19712.8	9537.66	-1.04742	6.27092e-05	0.00177824	NW_006271970.1	GO:0055085;GO:0016021	-	opiNOG14687	S	sp|Q7XKF4|YSL13_ORYSJ Probable metal-nicotianamine transporter YSL13 OS=Oryza sativa subsp. japonica GN=YSL13 PE=2 SV=2	oligopeptide transporter	18164585	GO:0055085//transmembrane transport;	GO:0016021//integral component of membrane;	-	-
CCM_02934	4793.2	2305.14	-1.05613	6.46538e-05	0.0018173	NW_006271970.1	GO:0016021;GO:0055085	-	sorNOG02725;sordNOG11728	R	sp|Q03795|YM30_YEAST Uncharacterized membrane protein YMR155W OS=Saccharomyces cerevisiae (strain ATCC 204508 / S288c) GN=YMR155W PE=1 SV=1	MFS transporter, putative	18164961	GO:0055085//transmembrane transport;	GO:0016021//integral component of membrane;	-	-
CCM_03778	59.7471	8.85688	-2.754	6.54951e-05	0.00183558	NW_006271971.1	-	-	-	-	-	hypothetical protein	18165801	-	-	-	-
CCM_05157	225.761	57.9177	-1.96272	6.79351e-05	0.00189843	NW_006271972.1	-	-	hypNOG09653;necNOG12491	S	-	hypothetical protein	18167176	-	-	-	-
CCM_08564	388.334	167.955	-1.20923	6.85818e-05	0.00191095	NW_006271975.1	GO:0000981;GO:0005634;GO:0006357;GO:0008270	-	opiNOG44498;sordNOG13587	S	-	Fungal transcriptional regulatory protein	18170570	GO:0006357//regulation of transcription by RNA polymerase II;	GO:0005634//nucleus;	GO:0000981//DNA-binding transcription factor activity, RNA polymerase II-specific;GO:0008270//zinc ion binding;	-
CCM_02541	61.7473	14.053	-2.1355	6.92875e-05	0.00192503	NW_006271970.1	-	-	-	-	-	hypothetical protein	18164568	-	-	-	-
CCM_01817	1081.11	505.788	-1.09591	7.40792e-05	0.00204047	NW_006271969.1	-	-	necNOG14012	S	-	hypothetical protein	18163847	-	-	-	-
CCM_07086	493.162	73.4428	-2.74737	7.43039e-05	0.00204081	NW_006271973.1	GO:0015098;GO:0016021;GO:0015689	K24175	opiNOG07479;sordNOG07405	G	sp|Q6N075|MFSD5_HUMAN Molybdate-anion transporter OS=Homo sapiens GN=MFSD5 PE=1 SV=2	major facilitator superfamily domain containing protein 5	18169097	GO:0015689//molybdate ion transport;	GO:0016021//integral component of membrane;	GO:0015098//molybdate ion transmembrane transporter activity;	-
CCM_05377	626.551	91.5466	-2.77485	7.4619e-05	0.00204362	NW_006271972.1	-	-	-	-	-	hypothetical protein	18167395	-	-	-	-
CCM_09350	247.89	101.467	-1.28869	7.54532e-05	0.0020606	NW_006271977.1	GO:0016787;GO:0051539;GO:0006284	K03575	sordNOG11758	L	sp|Q9UIF7|MUTYH_HUMAN Adenine DNA glycosylase OS=Homo sapiens GN=MUTYH PE=1 SV=1	A/G-specific adenine glycosylase	18171353	GO:0006284//base-excision repair;	-	GO:0016787//hydrolase activity;GO:0051539//4 iron, 4 sulfur cluster binding;	ko03410(Base excision repair)
CCM_05930	602.77	264.126	-1.19038	8.1378e-05	0.00219743	NW_006271972.1	-	-	sorNOG06794;opiNOG38382;sordNOG14180	RS	-	hypothetical protein	18167948	-	-	-	-
CCM_01384	41968.8	20396.1	-1.04102	8.22431e-05	0.00221457	NW_006271969.1	GO:0055114;GO:0016639;GO:0006520;GO:0005829	K00262	sordNOG06918;opiNOG05535	E	sp|Q96VJ7|DHE4_GIBFU NADP-specific glutamate dehydrogenase OS=Gibberella fujikuroi GN=GDH2 PE=3 SV=1	NADP-specific glutamate dehydrogenase	18163415	GO:0055114//obsolete oxidation-reduction process;GO:0006520//cellular amino acid metabolic process;	GO:0005829//cytosol;	GO:0016639//oxidoreductase activity, acting on the CH-NH2 group of donors, NAD or NADP as acceptor;	ko00910(Nitrogen metabolism);ko00250(Alanine, aspartate and glutamate metabolism);ko00220(Arginine biosynthesis)
CCM_00677	1408.42	366.27	-1.9431	8.34224e-05	0.00224005	NW_006271969.1	GO:0016021	-	NOG42379;opiNOG02845	S	-	hypothetical protein	18162711	-	GO:0016021//integral component of membrane;	-	-
CCM_00678	1326.61	240.441	-2.46399	8.58248e-05	0.00229176	NW_006271969.1	GO:0050660;GO:0003997;GO:0006635;GO:0005777	K00232	opiNOG02652	I	sp|Q8HYL8|ACOX1_PHACI Peroxisomal acyl-coenzyme A oxidase 1 OS=Phascolarctos cinereus GN=ACOX1 PE=1 SV=2	Acyl-CoA oxidase	18162712	GO:0006635//fatty acid beta-oxidation;	GO:0005777//peroxisome;	GO:0050660//flavin adenine dinucleotide binding;GO:0003997//acyl-CoA oxidase activity;	ko04936(Alcoholic liver disease);ko04146(Peroxisome);ko04024(cAMP signaling pathway);ko03320(PPAR signaling pathway);ko01040(Biosynthesis of unsaturated fatty acids);ko00640(Propanoate metabolism);ko00592(alpha-Linolenic acid metabolism);ko00410(beta-Alanine metabolism);ko00071(Fatty acid degradation)
CCM_02039	230.51	92.8942	-1.31117	8.9641e-05	0.00237388	NW_006271970.1	-	-	-	-	-	hypothetical protein	18164068	-	-	-	-
CCM_08683	11770.9	5793.1	-1.02282	9.14715e-05	0.0024157	NW_006271975.1	GO:0043565;GO:0010674;GO:0006990;GO:0000981;GO:0005634	K16230	sordNOG09649;sordNOG07510;opiNOG39852	SK	sp|Q8TFF3|HAC1_HYPJE Transcriptional activator hac1 OS=Hypocrea jecorina GN=hac1 PE=2 SV=1	Basic leucine zipper	18170689	GO:0010674//negative regulation of transcription from RNA polymerase II promoter involved in meiotic cell cycle;GO:0006990//positive regulation of transcription from RNA polymerase II promoter involved in unfolded protein response;	GO:0005634//nucleus;	GO:0043565//sequence-specific DNA binding;GO:0000981//DNA-binding transcription factor activity, RNA polymerase II-specific;	-
CCM_05156	3332.44	1218.54	-1.45143	9.49352e-05	0.00250031	NW_006271972.1	GO:0010181;GO:0055114;GO:0016491;GO:0016021	-	hypNOG01425;sordNOG12564	S	sp|B8NM62|USTO_ASPFN Pyridoxamine 5&apos;-phosphate oxidase family protein ustO OS=Aspergillus flavus (strain ATCC 200026 / FGSC A1120 / NRRL 3357 / JCM 12722 / SRRC 167) GN=ustO PE=3 SV=1	pyridoxamine phosphate oxidase family protein	18167175	GO:0055114//obsolete oxidation-reduction process;	GO:0016021//integral component of membrane;	GO:0010181//FMN binding;GO:0016491//oxidoreductase activity;	-
CCM_02829	166.164	61.3836	-1.43668	9.6568e-05	0.00252945	NW_006271970.1	-	-	opiNOG03177;sordNOG08795	S	sp|P53933|APP1_YEAST Phosphatidate phosphatase APP1 OS=Saccharomyces cerevisiae (strain ATCC 204508 / S288c) GN=APP1 PE=1 SV=1	hypothetical protein	18164856	-	-	-	-
CCM_01729	195.014	76.0171	-1.35918	9.79843e-05	0.00255264	NW_006271969.1	GO:0004497;GO:0055114;GO:0071949	-	sordNOG06744;opiNOG16080	S	sp|Q4WD48|FMPF_ASPFU Aromatic hydroxylase fmpF OS=Neosartorya fumigata (strain ATCC MYA-4609 / Af293 / CBS 101355 / FGSC A1100) GN=fmpF PE=2 SV=1	monooxygenase, putative	18163759	GO:0055114//obsolete oxidation-reduction process;	-	GO:0004497//monooxygenase activity;GO:0071949//FAD binding;	-
CCM_01088	3505.46	1711.94	-1.03397	9.9729e-05	0.00259107	NW_006271969.1	GO:0003676;GO:0000166	K14411	opiNOG05838;sordNOG07458;NOG214380	AR	sp|O94432|YHKF_SCHPO Uncharacterized RNA-binding protein C660.15 OS=Schizosaccharomyces pombe (strain 972 / ATCC 24843) GN=SPBC660.15 PE=4 SV=1	RNA recognition protein, RNP-1	18163121	-	-	GO:0003676//nucleic acid binding;GO:0000166//nucleotide binding;	ko03015(mRNA surveillance pathway)
CCM_00824	181.662	69.3186	-1.38994	0.000102483	0.00265545	NW_006271969.1	GO:0008152;GO:0016787	-	sordNOG10496	R	sp|O28058|Y2225_ARCFU Uncharacterized protein AF_2225 OS=Archaeoglobus fulgidus (strain ATCC 49558 / VC-16 / DSM 4304 / JCM 9628 / NBRC 100126) GN=AF_2225 PE=3 SV=1	fumarylacetoacetate hydrolase	18162858	GO:0008152//metabolic process;	-	GO:0016787//hydrolase activity;	-
CCM_07056	691.988	253.053	-1.45131	0.000103542	0.0026685	NW_006271973.1	-	-	sordNOG08133;opiNOG38589	S	-	hypothetical protein	18169067	-	-	-	-
CCM_04507	9953.65	4933.25	-1.01269	0.000104654	0.00268995	NW_006271971.1	-	-	sordNOG14255	S	-	hypothetical protein	18166530	-	-	-	-
CCM_09392	271.586	114.729	-1.24318	0.000109044	0.0027953	NW_006271977.1	GO:0008168;GO:0032259	-	NOG77321;opiNOG22420;opiNOG79492;NOG00993	ISR	sp|Q9KJ20|GSDMT_ACTHA Glycine/sarcosine/dimethylglycine N-methyltransferase OS=Actinopolyspora halophila PE=1 SV=1	methyl transferase-like protein	18171395	GO:0032259//methylation;	-	GO:0008168//methyltransferase activity;	-
CCM_09265	640.704	297.16	-1.10842	0.00011069	0.00282996	NW_006271976.1	GO:0055085;GO:0042626;GO:0005524;GO:0016021	-	sorNOG07348;opiNOG11164;COG1132	VQ	sp|Q8J2Q1|FUM19_GIBM7 ABC transporter FUM19 OS=Gibberella moniliformis (strain M3125 / FGSC 7600) GN=FUM19 PE=2 SV=1	ABC multidrug transporter, putative	18171268	GO:0055085//transmembrane transport;	GO:0016021//integral component of membrane;	GO:0042626//ATPase-coupled transmembrane transporter activity;GO:0005524//ATP binding;	-
CCM_07064	1020.83	482.418	-1.08139	0.00011361	0.0028969	NW_006271973.1	GO:0016787;GO:0005829;GO:0005634	-	opiNOG14740;sorNOG01600;COG3387	RSG	sp|Q10211|YAY3_SCHPO Uncharacterized protein C4H3.03c OS=Schizosaccharomyces pombe (strain 972 / ATCC 24843) GN=SPAC4H3.03c PE=4 SV=1	glycosyl hydrolase	18169075	-	GO:0005829//cytosol;GO:0005634//nucleus;	GO:0016787//hydrolase activity;	-
CCM_03722	961.227	453.128	-1.08496	0.000116469	0.00293862	NW_006271971.1	GO:0016021;GO:0055114;GO:0006629;GO:0016491	K13076	opiNOG06707;sordNOG10950;sorNOG07032	I	sp|Q6CMK7|SLD1_KLULA Delta 8-(E)-sphingolipid desaturase OS=Kluyveromyces lactis (strain ATCC 8585 / CBS 2359 / DSM 70799 / NBRC 1267 / NRRL Y-1140 / WM37) GN=SLD PE=3 SV=1	delta 8-(E)-sphingolipid desaturase	18165746	GO:0055114//obsolete oxidation-reduction process;GO:0006629//lipid metabolic process;	GO:0016021//integral component of membrane;	GO:0016491//oxidoreductase activity;	-
CCM_08339	128.225	44.8825	-1.51445	0.000120013	0.00301224	NW_006271975.1	GO:0016021	-	opiNOG42198;sorNOG05773;opiNOG42754;pleNOG05675	S	-	hypothetical protein	18170347	-	GO:0016021//integral component of membrane;	-	-
CCM_01015	1540.1	238.256	-2.69244	0.000122651	0.00307044	NW_006271969.1	-	-	pleNOG08937;opiNOG23821	S	-	hypothetical protein	18163048	-	-	-	-
CCM_04974	280.783	95.7983	-1.55139	0.000124274	0.0030982	NW_006271971.1	GO:0055114;GO:0016491	K00306	opiNOG13889;opiNOG31274	R	sp|O43029|FAP1_SCHPO L-pipecolate oxidase OS=Schizosaccharomyces pombe (strain 972 / ATCC 24843) GN=fap1 PE=1 SV=1	sarcosine oxidase	18166994	GO:0055114//obsolete oxidation-reduction process;	-	GO:0016491//oxidoreductase activity;	ko04146(Peroxisome);ko00310(Lysine degradation);ko00260(Glycine, serine and threonine metabolism)
CCM_02760	1419.92	674.835	-1.0732	0.000124683	0.0030982	NW_006271970.1	-	-	opiNOG17069;sorNOG05260;sordNOG11793	Q	sp|Q92781|RDH1_HUMAN 11-cis retinol dehydrogenase OS=Homo sapiens GN=RDH5 PE=1 SV=1	3-oxoacyl-(acyl-carrier-protein) reductase	18164787	-	-	-	-
CCM_07808	530.94	243.645	-1.12377	0.000124727	0.0030982	NW_006271974.1	GO:0016021;GO:0016757;GO:0006486	K10968	opiNOG12302;opiNOG45122	S	sp|Q59YS7|MNN14_CANAL Putative alpha-1,3-mannosyltransferase MNN14 OS=Candida albicans (strain SC5314 / ATCC MYA-2876) GN=MNN14 PE=2 SV=1	alpha-1,3-mannosyltransferase	18169818	GO:0006486//protein glycosylation;	GO:0016021//integral component of membrane;	GO:0016757//glycosyltransferase activity;	ko00514(Other types of O-glycan biosynthesis)
CCM_03193	292.437	123.988	-1.23793	0.000130731	0.00322414	NW_006271970.1	GO:0016787	K07019	sordNOG06861	R	sp|Q03649|YM60_YEAST Putative esterase YMR210W OS=Saccharomyces cerevisiae (strain ATCC 204508 / S288c) GN=YMR210W PE=1 SV=1	hydrolase, alpha/beta fold family	18165219	-	-	GO:0016787//hydrolase activity;	-
CCM_08018	377.634	114.277	-1.72445	0.000134427	0.00329655	NW_006271974.1	GO:0031177;GO:0016740;GO:0016491;GO:0055114	-	opiNOG01973	I	sp|W7MLD7|FUS1_GIBM7 Fusarin C synthetase OS=Gibberella moniliformis (strain M3125 / FGSC 7600) GN=FUS1 PE=1 SV=1	polyketide synthase, putative	18170027	GO:0055114//obsolete oxidation-reduction process;	-	GO:0031177//phosphopantetheine binding;GO:0016740//transferase activity;GO:0016491//oxidoreductase activity;	-
CCM_08264	689	197.001	-1.8063	0.000136923	0.00334072	NW_006271975.1	GO:0005634;GO:0003677;GO:0008270;GO:0006351	-	opiNOG76834;eurotNOG07853;opiNOG06841	SKR	sp|B8NJG9|LEPE_ASPFN Transcription factor lepE OS=Aspergillus flavus (strain ATCC 200026 / FGSC A1120 / NRRL 3357 / JCM 12722 / SRRC 167) GN=lepB PE=3 SV=1	C6 zinc finger domain-containing protein	18170272	GO:0006351//transcription, DNA-templated;	GO:0005634//nucleus;	GO:0003677//DNA binding;GO:0008270//zinc ion binding;	-
CCM_00909	510.751	21.4962	-4.57047	0.000148435	0.00359569	NW_006271969.1	GO:0016787	-	sordNOG08788	T	sp|D4B1N9|LIP3_ARTBC Probable secreted lipase ARB_02369 OS=Arthroderma benhamiae (strain ATCC MYA-4681 / CBS 112371) GN=ARB_02369 PE=1 SV=1	extracellular lipase, putative	18162943	-	-	GO:0016787//hydrolase activity;	-
CCM_08304	376.737	133.193	-1.50004	0.000157168	0.00379611	NW_006271975.1	GO:0016021;GO:0055085	-	COG0477;opiNOG49354;opiNOG48896	G	sp|A0A089FNE5|PRLL_FUNXX MFS transporter prlL OS=Fungal sp. (strain NRRL 50135) GN=prlL PE=3 SV=1	pantothenate transporter, putative	18170312	GO:0055085//transmembrane transport;	GO:0016021//integral component of membrane;	-	-
CCM_03457	87.6147	17.4396	-2.3288	0.000157929	0.00380494	NW_006271970.1	GO:0008152;GO:0016846	-	sordNOG14804;necNOG13377	S	-	putative glutathione-dependent formaldehyde-activating protein	18165483	GO:0008152//metabolic process;	-	GO:0016846//carbon-sulfur lyase activity;	-
CCM_03459	3723.61	1770.62	-1.07245	0.000160997	0.00385952	NW_006271970.1	GO:0016491;GO:0055114	-	opiNOG22969;sordNOG10321;opiNOG53024	I	-	hypothetical protein	18165485	GO:0055114//obsolete oxidation-reduction process;	-	GO:0016491//oxidoreductase activity;	-
CCM_07254	136.081	49.4681	-1.45989	0.000162912	0.0038957	NW_006271973.1	GO:0000981;GO:0005634;GO:0008270;GO:0006357;GO:0003677	-	opiNOG05763;sordNOG06793	RS	-	C6 transcription factor	18169265	GO:0006357//regulation of transcription by RNA polymerase II;	GO:0005634//nucleus;	GO:0000981//DNA-binding transcription factor activity, RNA polymerase II-specific;GO:0008270//zinc ion binding;GO:0003677//DNA binding;	-
CCM_01498	3798.8	1461.82	-1.37778	0.000164998	0.00392605	NW_006271969.1	GO:0016021	-	opiNOG20622;sordNOG07415	S	-	hypothetical protein	18163529	-	GO:0016021//integral component of membrane;	-	-
CCM_06045	26716.9	12838.3	-1.05729	0.000169856	0.00402174	NW_006271972.1	GO:0055085;GO:0016021	-	sordNOG05921;sorNOG00625;opiNOG52830	T	sp|P40900|ISP4_SCHPO Sexual differentiation process protein isp4 OS=Schizosaccharomyces pombe (strain 972 / ATCC 24843) GN=isp4 PE=2 SV=2	Tetrapeptide transporter, OPT1/isp4	18168062	GO:0055085//transmembrane transport;	GO:0016021//integral component of membrane;	-	-
CCM_03738	204.296	53.6583	-1.92879	0.000175546	0.00411591	NW_006271971.1	GO:0090305;GO:0004519;GO:0003676	-	opiNOG20494	S	sp|Q9Y4A0|JERKL_HUMAN Jerky protein homolog-like OS=Homo sapiens GN=JRKL PE=2 SV=2	DDE superfamily endonuclease, CENP-B-like protein	18165761	GO:0090305//nucleic acid phosphodiester bond hydrolysis;	-	GO:0004519//endonuclease activity;GO:0003676//nucleic acid binding;	-
CCM_07167	1108.83	478.601	-1.21214	0.000178576	0.00417676	NW_006271973.1	-	-	-	-	-	hypothetical protein	18169178	-	-	-	-
CCM_01630	1673.86	831.001	-1.01025	0.000191432	0.00441861	NW_006271969.1	GO:0003700;GO:0006355;GO:0043565;GO:0008270	-	opiNOG15221;magNOG12919;opiNOG64699	RSK	sp|Q55GK0|GTAE_DICDI GATA zinc finger domain-containing protein 5 OS=Dictyostelium discoideum GN=gtaE PE=4 SV=1	Zinc finger domain-containing protein, GATA-type	18163660	GO:0006355//regulation of transcription, DNA-templated;	-	GO:0003700//DNA-binding transcription factor activity;GO:0043565//sequence-specific DNA binding;GO:0008270//zinc ion binding;	-
CCM_02163	4073.31	1450.31	-1.48984	0.000191653	0.00441861	NW_006271970.1	GO:0016021;GO:0006817;GO:0051604	-	sordNOG04527;opiNOG08565	P	sp|P38264|PHO88_YEAST SRP-independent targeting protein 3 OS=Saccharomyces cerevisiae (strain ATCC 204508 / S288c) GN=PHO88 PE=1 SV=1	inorganic phosphate transporter	18164191	GO:0006817//phosphate ion transport;GO:0051604//protein maturation;	GO:0016021//integral component of membrane;	-	-
CCM_03032	343.519	153.73	-1.15999	0.000192133	0.00441861	NW_006271970.1	GO:0004553;GO:0005975	-	opiNOG11771	R	sp|D4AJR9|EGLX_ARTBC Endo-1,3(4)-beta-glucanase ARB_04519 OS=Arthroderma benhamiae (strain ATCC MYA-4681 / CBS 112371) GN=ARB_04519 PE=3 SV=1	GPI anchored endo-1,3(4)-beta-glucanase	18165059	GO:0005975//carbohydrate metabolic process;	-	GO:0004553//hydrolase activity, hydrolyzing O-glycosyl compounds;	-
CCM_01415	196.072	79.4742	-1.30282	0.000215518	0.00487477	NW_006271969.1	GO:0008152;GO:0016758	-	opiNOG70653;opiNOG26899	S	sp|A0A1B4XBH6|SDNJ_SORAA Glycosyltransferase sdnJ OS=Sordaria araneosa GN=sdnJ PE=1 SV=1	putative glycosyltransferase	18163446	GO:0008152//metabolic process;	-	GO:0016758//hexosyltransferase activity;	-
CCM_00043	77.869	9.50148	-3.03483	0.000238624	0.00532226	NW_006271969.1	GO:0016021;GO:0055085	-	sordNOG10259;opiNOG17171;NOG131545	UR	sp|A1CFL0|PATC_ASPCL Efflux pump patC OS=Aspergillus clavatus (strain ATCC 1007 / CBS 513.65 / DSM 816 / NCTC 3887 / NRRL 1) GN=patC PE=1 SV=1	Major facilitator superfamily transporter	18162078	GO:0055085//transmembrane transport;	GO:0016021//integral component of membrane;	-	-
CCM_07587	605.113	295.833	-1.03242	0.000245687	0.00541695	NW_006271974.1	GO:0005634;GO:0000981;GO:0008270;GO:0006357	-	opiNOG22438	S	-	C6 zinc finger domain protein	18169598	GO:0006357//regulation of transcription by RNA polymerase II;	GO:0005634//nucleus;	GO:0000981//DNA-binding transcription factor activity, RNA polymerase II-specific;GO:0008270//zinc ion binding;	-
CCM_06466	718.985	349.419	-1.041	0.000250784	0.00549154	NW_006271973.1	GO:0006357;GO:0008270;GO:0005634;GO:0000981	-	sordNOG12932;hypNOG10363	S	-	Fungal transcriptional regulatory protein	18168480	GO:0006357//regulation of transcription by RNA polymerase II;	GO:0005634//nucleus;	GO:0008270//zinc ion binding;GO:0000981//DNA-binding transcription factor activity, RNA polymerase II-specific;	-
CCM_08547	223.028	94.2859	-1.24211	0.000251845	0.00550224	NW_006271975.1	-	-	sordNOG09515	R	-	MYND domain protein	18170554	-	-	-	-
CCM_04677	680.694	216.612	-1.6519	0.000256248	0.00558573	NW_006271971.1	-	-	sordNOG05494	S	sp|Q06466|TDA6_YEAST Putative vacuolar protein sorting-associated protein TDA6 OS=Saccharomyces cerevisiae (strain ATCC 204508 / S288c) GN=TDA6 PE=2 SV=1	hypothetical protein	18166699	-	-	-	-
CCM_04666	166.584	15.1186	-3.46185	0.000259526	0.0056444	NW_006271971.1	GO:0008080	-	hypNOG01987	R	-	GNAT family N-acetyltransferase	18166688	-	-	GO:0008080//N-acetyltransferase activity;	-
CCM_09452	67.7486	19.4193	-1.8027	0.000262214	0.00566781	NW_006271977.1	-	-	-	-	-	hypothetical protein	18171455	-	-	-	-
CCM_00654	358.042	163.708	-1.129	0.000281444	0.00601226	NW_006271969.1	GO:0016021	-	opiNOG27827;opiNOG25834;opiNOG53814	R	sp|B8NM75|USTT_ASPFN Efflux pump ustT OS=Aspergillus flavus (strain ATCC 200026 / FGSC A1120 / NRRL 3357 / JCM 12722 / SRRC 167) GN=ustT PE=3 SV=1	Major facilitator superfamily transporter	18162688	-	GO:0016021//integral component of membrane;	-	-
CCM_07342	33988.1	15756.2	-1.10911	0.000293507	0.00624223	NW_006271974.1	GO:0016787	-	opiNOG63405	R	-	Glycoside hydrolase, family 25	18169353	-	-	GO:0016787//hydrolase activity;	-
CCM_02279	337.563	153.317	-1.13864	0.000295968	0.00628067	NW_006271970.1	GO:0004527;GO:0005829;GO:0005634;GO:0090305;GO:0003676	K13288	sordNOG12418	L	sp|O94626|ORN_SCHPO Probable oligoribonuclease OS=Schizosaccharomyces pombe (strain 972 / ATCC 24843) GN=rex2 PE=3 SV=2	RNA exonuclease Rex2, putative	18164306	GO:0090305//nucleic acid phosphodiester bond hydrolysis;	GO:0005829//cytosol;GO:0005634//nucleus;	GO:0004527//exonuclease activity;GO:0003676//nucleic acid binding;	ko03008(Ribosome biogenesis in eukaryotes)
CCM_01800	117.08	36.1119	-1.69695	0.00029865	0.00632361	NW_006271969.1	GO:0015171;GO:0016021;GO:0003333	-	COG0833;pleNOG00932;opiNOG13147	E	sp|P34054|INDA1_HYPAT Amino-acid permease inda1 OS=Hypocrea atroviridis GN=inda1 PE=2 SV=1	amino acid transporter, putative	18163830	GO:0003333//amino acid transmembrane transport;	GO:0016021//integral component of membrane;	GO:0015171//amino acid transmembrane transporter activity;	-
CCM_08827	259.066	113.556	-1.18991	0.000299538	0.00632849	NW_006271975.1	GO:0051213;GO:0055114	K19245	sorNOG02663;opiNOG04653	I	sp|Q12358|JLP1_YEAST Alpha-ketoglutarate-dependent sulfonate dioxygenase OS=Saccharomyces cerevisiae (strain ATCC 204508 / S288c) GN=JLP1 PE=1 SV=1	Taurine catabolism dioxygenase TauD/TfdA	18170832	GO:0055114//obsolete oxidation-reduction process;	-	GO:0051213//dioxygenase activity;	-
CCM_08833	173.595	71.4577	-1.28056	0.000301593	0.00635792	NW_006271975.1	GO:0016491;GO:0008270;GO:0055114	-	COG0604;opiNOG79815;opiNOG13342	C	sp|K4BW79|ENOX_SOLLC 2-methylene-furan-3-one reductase OS=Solanum lycopersicum GN=EO PE=1 SV=1	alcohol dehydrogenase, putative	18170838	GO:0055114//obsolete oxidation-reduction process;	-	GO:0016491//oxidoreductase activity;GO:0008270//zinc ion binding;	-
CCM_02866	56.3981	13.3151	-2.08259	0.000304607	0.00639343	NW_006271970.1	-	-	opiNOG47779;sordNOG12917;opiNOG27313	S	-	hypothetical protein	18164893	-	-	-	-
CCM_07253	4269.24	2069.23	-1.04489	0.000306889	0.00642729	NW_006271973.1	GO:0006355;GO:0005488	-	-	-	-	hypothetical protein	18169264	GO:0006355//regulation of transcription, DNA-templated;	-	GO:0005488//binding;	-
CCM_02118	232.487	84.9175	-1.45302	0.000316874	0.00660761	NW_006271970.1	GO:0008080	-	opiNOG45686;eurotNOG12517;opiNOG27023	RS	-	Acyl-CoA N-acyltransferase	18164146	-	-	GO:0008080//N-acetyltransferase activity;	-
CCM_06800	70.3578	21.3735	-1.71889	0.000322444	0.00670922	NW_006271973.1	-	-	-	-	-	hypothetical protein	18168811	-	-	-	-
CCM_03281	120.407	45.2441	-1.41212	0.000324219	0.00673157	NW_006271970.1	-	-	-	-	-	hypothetical protein	18165307	-	-	-	-
CCM_05590	2034.15	935.919	-1.11997	0.000326626	0.00673788	NW_006271972.1	-	-	hypNOG03410;opiNOG36644;sordNOG14036	S	-	hypothetical protein	18167608	-	-	-	-
CCM_05086	16.3292	0.640076	-4.67307	0.000334729	0.00687554	NW_006271972.1	GO:0005576	-	pleNOG08652;opiNOG34962;sordNOG12599	S	sp|P47032|PRY1_YEAST Protein PRY1 OS=Saccharomyces cerevisiae (strain ATCC 204508 / S288c) GN=PRY1 PE=1 SV=1	extracellular SCP domain protein Pry1, putative	18167106	-	GO:0005576//extracellular region;	-	-
CCM_06217	2516.84	527.734	-2.25373	0.000341488	0.00699941	NW_006271972.1	-	K13993	NOG70193;hypNOG13011;sordNOG13627	O	sp|O14368|HSP16_SCHPO Heat shock protein 16 OS=Schizosaccharomyces pombe (strain 972 / ATCC 24843) GN=hsp16 PE=1 SV=1	HSP20-like chaperone	18168232	-	-	-	ko04141(Protein processing in endoplasmic reticulum)
CCM_03543	130.708	50.2712	-1.37854	0.000345258	0.00704664	NW_006271970.1	GO:0016787	K07025	opiNOG70312;sordNOG04167	R	sp|Q58832|G3PP_METJA Glyceraldehyde 3-phosphate phosphatase OS=Methanocaldococcus jannaschii (strain ATCC 43067 / DSM 2661 / JAL-1 / JCM 10045 / NBRC 100440) GN=MJ1437 PE=3 SV=1	Haloacid dehalogenase-like hydrolase	18165569	-	-	GO:0016787//hydrolase activity;	-
CCM_07905	200.579	85.3167	-1.23327	0.000351878	0.00713629	NW_006271974.1	-	-	-	-	-	hypothetical protein	18169915	-	-	-	-
CCM_00026	117.056	43.1288	-1.44048	0.000358132	0.00721745	NW_006271969.1	-	-	opiNOG38242	S	-	hypothetical protein	18162061	-	-	-	-
CCM_02081	161.2	35.0368	-2.20191	0.000380302	0.00758474	NW_006271970.1	-	-	-	-	-	hypothetical protein	18164110	-	-	-	-
CCM_06029	206.174	63.058	-1.70911	0.000390532	0.00769299	NW_006271972.1	GO:0016021	K14209	sordNOG09267	E	sp|P36062|AVT3_YEAST Vacuolar amino acid transporter 3 OS=Saccharomyces cerevisiae (strain ATCC 204508 / S288c) GN=AVT3 PE=1 SV=1	amino acid transporter	18168046	-	GO:0016021//integral component of membrane;	-	ko04974(Protein digestion and absorption);ko04138(Autophagy - yeast)
CCM_01719	177.38	73.7176	-1.26677	0.000392842	0.00770692	NW_006271969.1	GO:0030173;GO:0097624;GO:0005351;GO:0015992;GO:0005459	K15272	opiNOG02861;sordNOG05444	G	sp|P87041|GMS1_SCHPO UDP-galactose transporter OS=Schizosaccharomyces pombe (strain 972 / ATCC 24843) GN=gms1 PE=2 SV=3	UDP-galactose transporter, putative	18163749	GO:0097624//UDP-galactose transmembrane import into Golgi lumen;	GO:0030173//integral component of Golgi membrane;	GO:0005351//carbohydrate:proton symporter activity;GO:0005459//UDP-galactose transmembrane transporter activity;	-
CCM_02733	29.8182	2.13654	-3.80285	0.000407653	0.00794882	NW_006271970.1	-	-	-	-	-	hypothetical protein	18164760	-	-	-	-
CCM_05457	575.542	284.622	-1.01587	0.000414545	0.00800954	NW_006271972.1	GO:0046872;GO:0016491;GO:0055114	-	sordNOG10520;sorNOG01739	Q	sp|Q84MB6|DIOX2_ARATH Probable 2-oxoglutarate-dependent dioxygenase At3g50210 OS=Arabidopsis thaliana GN=At3g50210 PE=2 SV=1	oxidoreductase	18167475	GO:0055114//obsolete oxidation-reduction process;	-	GO:0046872//metal ion binding;GO:0016491//oxidoreductase activity;	-
CCM_09603	66.4743	10.2074	-2.70319	0.000414799	0.00800954	NW_006271978.1	-	-	-	-	-	hypothetical protein	18171605	-	-	-	-
CCM_07839	97544.2	27011.9	-1.85246	0.000419885	0.0080566	NW_006271974.1	GO:0005524;GO:0006950;GO:0006457;GO:0051082	K04079	opiNOG01126;sordNOG09788	O	sp|O43109|HSP90_PODAS Heat shock protein 90 homolog OS=Podospora anserina GN=MOD-E PE=3 SV=1	heat shock protein 90	18169849	GO:0006950//response to stress;GO:0006457//protein folding;	-	GO:0005524//ATP binding;GO:0051082//unfolded protein binding;	ko05418(Fluid shear stress and atherosclerosis);ko05417(Lipid and atherosclerosis);ko05215(Prostate cancer);ko05207(Chemical carcinogenesis - receptor activation);ko05200(Pathways in cancer);ko05132(Salmonella infection);ko04915(Estrogen signaling pathway);ko04914(Progesterone-mediated oocyte maturation);ko04659(Th17 cell differentiation);ko04657(IL-17 signaling pathway);ko04626(Plant-pathogen in…
CCM_06174	179.246	76.4895	-1.22861	0.000426348	0.00813651	NW_006271972.1	-	-	-	-	-	hypothetical protein	18168189	-	-	-	-
CCM_08037	67.4437	20.1145	-1.74545	0.0004277	0.00814154	NW_006271974.1	-	-	sordNOG13300;hypNOG12388	R	-	C2H2 finger domain protein, putative	18170046	-	-	-	-
CCM_04129	232.762	99.2956	-1.22905	0.000428885	0.00814796	NW_006271971.1	GO:0009055	K03521	opiNOG00480	C	sp|P38117|ETFB_HUMAN Electron transfer flavoprotein subunit beta OS=Homo sapiens GN=ETFB PE=1 SV=3	electron transfer flavoprotein beta-subunit	18166152	-	-	GO:0009055//electron transfer activity;	-
CCM_02565	5393.99	2687.22	-1.00524	0.00045207	0.00853781	NW_006271970.1	-	K02959	onyNOG06015;opiNOG48356;opiNOG34113	S	sp|I1RFC6|ZEB2_GIBZE Transcription factor ZEB2 OS=Gibberella zeae (strain PH-1 / ATCC MYA-4620 / FGSC 9075 / NRRL 31084) GN=ZEB2 PE=2 SV=1	hypothetical protein	18164592	-	-	-	ko03010(Ribosome)
CCM_02363	161.89	67.8055	-1.25554	0.000493131	0.00915147	NW_006271970.1	GO:0016021	-	opiNOG28111	S	-	hypothetical protein	18164390	-	GO:0016021//integral component of membrane;	-	-
CCM_08274	195.886	84.4174	-1.21441	0.000502062	0.00926357	NW_006271975.1	GO:0055114;GO:0016491;GO:0016021;GO:0009073;GO:0003849;GO:0071949	K00480	opiNOG50043;opiNOG53451	IR	sp|J4VWM7|OPS4_BEAB2 FAD-dependent monooxygenase OpS4 OS=Beauveria bassiana (strain ARSEF 2860) GN=OpS4 PE=1 SV=1	salicylate hydroxylase, putative	18170282	GO:0055114//obsolete oxidation-reduction process;GO:0009073//aromatic amino acid family biosynthetic process;	GO:0016021//integral component of membrane;	GO:0016491//oxidoreductase activity;GO:0003849//3-deoxy-7-phosphoheptulonate synthase activity;GO:0071949//FAD binding;	ko00626(Naphthalene degradation);ko00624(Polycyclic aromatic hydrocarbon degradation);ko00621(Dioxin degradation)
CCM_03585	184.714	32.827	-2.49234	0.000509888	0.00938995	NW_006271970.1	-	-	hypNOG14200;sorNOG08558;sordNOG14926	S	-	hypothetical protein	18165611	-	-	-	-
CCM_08789	981.275	472.97	-1.05291	0.000529849	0.00970178	NW_006271975.1	GO:0015171;GO:0003333;GO:0016021	K16261	opiNOG03662	E	sp|P53388|DIP5_YEAST Dicarboxylic amino acid permease OS=Saccharomyces cerevisiae (strain ATCC 204508 / S288c) GN=DIP5 PE=1 SV=1	amino acid/polyamine transporter I	18170794	GO:0003333//amino acid transmembrane transport;	GO:0016021//integral component of membrane;	GO:0015171//amino acid transmembrane transporter activity;	-
CCM_06930	68.7087	21.2159	-1.69535	0.00053289	0.00973891	NW_006271973.1	-	-	NOG200556	S	-	protein-tyrosine phosphatase	18168941	-	-	-	-
CCM_07885	5502.59	785.076	-2.80921	0.00056577	0.0102425	NW_006271974.1	-	-	-	-	-	hypothetical protein	18169895	-	-	-	-
CCM_02432	231.125	105.015	-1.13808	0.000577717	0.0103806	NW_006271970.1	-	-	opiNOG50536	S	-	hypothetical protein	18164459	-	-	-	-
CCM_05039	7505.5	51.4241	-7.18936	0.000612829	0.0108692	NW_006271972.1	GO:0016620;GO:0055114	-	sordNOG14962;hypNOG13793;opiNOG45017	S	-	Grg1 protein	18167059	GO:0055114//obsolete oxidation-reduction process;	-	GO:0016620//oxidoreductase activity, acting on the aldehyde or oxo group of donors, NAD or NADP as acceptor;	-
CCM_04890	210.945	93.39	-1.17553	0.000634784	0.0111801	NW_006271971.1	-	-	-	-	-	hypothetical protein	18166911	-	-	-	-
CCM_08845	556.957	276.151	-1.01211	0.000639403	0.0112369	NW_006271975.1	GO:0050790;GO:0003984;GO:0009082;GO:0016597;GO:0005948;GO:0030234;GO:0042645	K01653	sordNOG07969;opiNOG06493	E	sp|P25605|ILV6_YEAST Acetolactate synthase small subunit, mitochondrial OS=Saccharomyces cerevisiae (strain ATCC 204508 / S288c) GN=ILV6 PE=1 SV=2	acetolactate synthase small subunit	18170850	GO:0050790//regulation of catalytic activity;GO:0009082//branched-chain amino acid biosynthetic process;	GO:0005948//acetolactate synthase complex;GO:0042645//mitochondrial nucleoid;	GO:0003984//acetolactate synthase activity;GO:0016597//amino acid binding;GO:0030234//enzyme regulator activity;	ko00770(Pantothenate and CoA biosynthesis);ko00660(C5-Branched dibasic acid metabolism);ko00650(Butanoate metabolism);ko00290(Valine, leucine and isoleucine biosynthesis)
CCM_01629	183.878	15.6288	-3.55647	0.000656924	0.0115028	NW_006271969.1	GO:0005524;GO:0016021;GO:0098655;GO:0046872;GO:0019829	K01536	sordNOG07740	P	sp|P22189|ATC3_SCHPO Calcium-transporting ATPase 3 OS=Schizosaccharomyces pombe (strain 972 / ATCC 24843) GN=cta3 PE=1 SV=1	potassium/sodium efflux P-type ATPase	18163659	GO:0098655//cation transmembrane transport;	GO:0016021//integral component of membrane;	GO:0005524//ATP binding;GO:0046872//metal ion binding;GO:0019829//ATPase-coupled cation transmembrane transporter activity;	-
CCM_00142	259.606	75.1388	-1.7887	0.000713009	0.0122834	NW_006271969.1	GO:0016491;GO:0055114	K00274	COG1231;opiNOG54536;opiNOG14129	EQ	sp|Q54IT3|AOFA_DICDI Probable flavin-containing monoamine oxidase A OS=Dictyostelium discoideum GN=maoA PE=3 SV=1	mao-B, putative	18162177	GO:0055114//obsolete oxidation-reduction process;	-	GO:0016491//oxidoreductase activity;	ko05034(Alcoholism);ko05031(Amphetamine addiction);ko05030(Cocaine addiction);ko05012(Parkinson disease);ko04728(Dopaminergic synapse);ko04726(Serotonergic synapse);ko00982(Drug metabolism - cytochrome P450);ko00950(Isoquinoline alkaloid biosynthesis);ko00380(Tryptophan metabolism);ko00360(Phenylalanine metabolism);ko00350(Tyrosine metabolism);ko00340(Histidine metabolism);ko00330(Arginine and pr…
CCM_04624	309.438	108.888	-1.5068	0.000714872	0.0122935	NW_006271971.1	GO:0004342;GO:0016787;GO:0005975;GO:0006044	K02564	sordNOG10474;opiNOG01632	G	sp|Q5TNH5|GNPI_ANOGA Glucosamine-6-phosphate isomerase OS=Anopheles gambiae GN=Gnpda1 PE=3 SV=3	glucosamine-6-phosphate deaminase	18166646	GO:0005975//carbohydrate metabolic process;GO:0006044//N-acetylglucosamine metabolic process;	-	GO:0004342//glucosamine-6-phosphate deaminase activity;GO:0016787//hydrolase activity;	ko00520(Amino sugar and nucleotide sugar metabolism)
CCM_07871	70.5309	23.062	-1.61274	0.000716879	0.0122999	NW_006271974.1	-	-	hypNOG13266;NOG54400	RS	-	hypothetical protein	18169881	-	-	-	-
CCM_08977	417.875	206.832	-1.01461	0.000717805	0.0122999	NW_006271975.1	-	-	opiNOG31843;sorNOG08573;pleNOG09214	SR	-	Cyclin-like F-box	18170981	-	-	-	-
CCM_02974	118.36	11.2621	-3.39363	0.000731848	0.012496	NW_006271970.1	GO:0055085;GO:0016021	-	opiNOG03645;COG1840	RP	sp|D7PHY8|VRTL_PENAE Efflux pump vrtL OS=Penicillium aethiopicum GN=vrtL PE=1 SV=1	MFS multidrug transporter	18165001	GO:0055085//transmembrane transport;	GO:0016021//integral component of membrane;	-	-
CCM_06583	155.966	59.4899	-1.39051	0.000742601	0.0126124	NW_006271973.1	GO:0016021;GO:0005783;GO:0055085	-	sordNOG08245;pleNOG08049;opiNOG06346	U	sp|O74852|YQ92_SCHPO Uncharacterized MFS-type transporter C18.02 OS=Schizosaccharomyces pombe (strain 972 / ATCC 24843) GN=SPCC18.02 PE=3 SV=1	membrane transporter	18168597	GO:0055085//transmembrane transport;	GO:0016021//integral component of membrane;GO:0005783//endoplasmic reticulum;	-	-
CCM_08189	313.141	128.109	-1.28945	0.000757211	0.012768	NW_006271974.1	GO:0000155;GO:0023014;GO:0005622;GO:0000160	-	opiNOG15245;sordNOG09577	S	sp|O48963|PHOT1_ARATH Phototropin-1 OS=Arabidopsis thaliana GN=PHOT1 PE=1 SV=1	PAS-like protein	18170198	GO:0000160//phosphorelay signal transduction system;	GO:0005622//intracellular anatomical structure;	GO:0000155//phosphorelay sensor kinase activity;	-
CCM_01607	318.965	153.288	-1.05716	0.000805432	0.0133264	NW_006271969.1	GO:0050661;GO:0055114;GO:0008677	K00077	sordNOG08893;hypNOG07114;COG1893	H	sp|S0EGG0|BEA2_GIBF5 Ketoisovalerate reductase BEA2 OS=Gibberella fujikuroi (strain CBS 195.34 / IMI 58289 / NRRL A-6831) GN=BEA2 PE=2 SV=1	2-dehydropantoate 2-reductase	18163637	GO:0055114//obsolete oxidation-reduction process;	-	GO:0050661//NADP binding;GO:0008677//2-dehydropantoate 2-reductase activity;	ko00770(Pantothenate and CoA biosynthesis)
CCM_01685	43.5152	6.93756	-2.64902	0.000829152	0.0135555	NW_006271969.1	GO:0016021	-	eurotNOG07137;opiNOG56571	S	-	hypothetical protein	18163715	-	GO:0016021//integral component of membrane;	-	-
CCM_04986	190.026	85.2232	-1.15688	0.000841667	0.0137135	NW_006271971.1	GO:0016021;GO:0055085	-	sordNOG15659;NOG130255;eurotNOG10989;opiNOG30307	RG	sp|B8NM75|USTT_ASPFN Efflux pump ustT OS=Aspergillus flavus (strain ATCC 200026 / FGSC A1120 / NRRL 3357 / JCM 12722 / SRRC 167) GN=ustT PE=3 SV=1	MFS transporter, putative	18167006	GO:0055085//transmembrane transport;	GO:0016021//integral component of membrane;	-	-
CCM_00804	942.333	324.836	-1.53653	0.000868629	0.0140812	NW_006271969.1	GO:0032259;GO:0008168	-	opiNOG45969;opiNOG44766;hypNOG02575;sordNOG12360	R	-	hypothetical protein	18162838	GO:0032259//methylation;	-	GO:0008168//methyltransferase activity;	-
CCM_07565	18.6375	1.77242	-3.39442	0.000888374	0.0143047	NW_006271974.1	GO:0016021	-	sordNOG13260;sorNOG07726;opiNOG43582;opiNOG36082	S	-	F-box domain-containing protein	18169576	-	GO:0016021//integral component of membrane;	-	-
CCM_04185	912.019	331.215	-1.46129	0.000911483	0.0145308	NW_006271971.1	GO:0005634;GO:0005829;GO:0004106;GO:0046417;GO:0009094;GO:0006571	K01850	opiNOG09200;sorNOG03008;sordNOG09884	E	sp|P32178|CHMU_YEAST Chorismate mutase OS=Saccharomyces cerevisiae (strain ATCC 204508 / S288c) GN=ARO7 PE=1 SV=1	Chorismate mutase, AroQ class, eukaryotic type	18166208	GO:0046417//chorismate metabolic process;GO:0009094//L-phenylalanine biosynthetic process;GO:0006571//tyrosine biosynthetic process;	GO:0005634//nucleus;GO:0005829//cytosol;	GO:0004106//chorismate mutase activity;	ko00400(Phenylalanine, tyrosine and tryptophan biosynthesis)
CCM_03465	24.0279	3.19947	-2.9088	0.000969738	0.0152821	NW_006271970.1	-	-	-	-	-	hypothetical protein	18165491	-	-	-	-
CCM_04446	134.481	23.3748	-2.52438	0.00100522	0.0156869	NW_006271971.1	GO:0016021	-	opiNOG41983	R	-	phosphoglycerate mutase family protein, putative	18166469	-	GO:0016021//integral component of membrane;	-	-
CCM_05089	367.45	156.398	-1.23232	0.00100732	0.0156943	NW_006271972.1	-	-	sordNOG08374;COG5587;opiNOG10569	S	-	hypothetical protein	18167109	-	-	-	-
CCM_06504	614.204	280.249	-1.13201	0.00101221	0.0157274	NW_006271973.1	GO:0005634;GO:0071592;GO:0005829;GO:0016311;GO:0006190;GO:0009117;GO:0000287;GO:0050483;GO:0071590	K18550	sordNOG07253;sorNOG03514	F	sp|Q4HTS9|ISN1_GIBZE IMP-specific 5&apos;-nucleotidase 1 OS=Gibberella zeae (strain PH-1 / ATCC MYA-4620 / FGSC 9075 / NRRL 31084) GN=ISN1 PE=3 SV=2	IMP-specific 5'-nucleotidase 1	18168518	GO:0071592//nicotinic acid riboside biosynthetic process;GO:0016311//dephosphorylation;GO:0006190//inosine salvage;GO:0009117//nucleotide metabolic process;GO:0071590//nicotinamide riboside biosynthetic process;	GO:0005634//nucleus;GO:0005829//cytosol;	GO:0000287//magnesium ion binding;GO:0050483//IMP 5'-nucleotidase activity;	ko00760(Nicotinate and nicotinamide metabolism);ko00230(Purine metabolism)
CCM_03327	89.7955	0.36321	-7.9497	0.00103058	0.0159788	NW_006271970.1	GO:0016021	-	opiNOG48115	S	-	hypothetical protein	18165353	-	GO:0016021//integral component of membrane;	-	-
CCM_08485	545.314	167.567	-1.70235	0.00104911	0.0161838	NW_006271975.1	GO:0003824	-	sordNOG04870;sorNOG02315	R	sp|Q2U4L7|GTAA_ASPOR Glutaminase A OS=Aspergillus oryzae (strain ATCC 42149 / RIB 40) GN=gtaA PE=1 SV=2	glutaminase GtaA	18170492	-	-	GO:0003824//catalytic activity;	-
CCM_02183	11959.8	3167.57	-1.91675	0.00105214	0.0161838	NW_006271970.1	-	-	opiNOG75267;opiNOG38566;sorNOG08569;opiNOG73720;sordNOG14747	SR	-	hypothetical protein	18164211	-	-	-	-
CCM_03669	597.397	221.435	-1.43181	0.00105895	0.0162615	NW_006271971.1	GO:0016021;GO:0055085	-	sordNOG04002;opiNOG12729	RG	sp|P57788|MOT4_CHICK Monocarboxylate transporter 4 OS=Gallus gallus GN=SLC16A3 PE=2 SV=1	monocarboxylate permease	18165693	GO:0055085//transmembrane transport;	GO:0016021//integral component of membrane;	-	-
CCM_06633	3491.81	1745.76	-1.00012	0.00114487	0.0173529	NW_006271973.1	GO:0042802;GO:0000794;GO:0005940;GO:0016925;GO:0031386	-	sordNOG13717;opiNOG38078;sordNOG13659	O	sp|Q12306|SMT3_YEAST Ubiquitin-like protein SMT3 OS=Saccharomyces cerevisiae (strain ATCC 204508 / S288c) GN=SMT3 PE=1 SV=1	ubiquitin-like modifier SUMO, putative	18168647	GO:0016925//protein sumoylation;	GO:0000794//condensed nuclear chromosome;GO:0005940//septin ring;	GO:0042802//identical protein binding;GO:0031386//protein tag;	-
CCM_04557	575.705	226.872	-1.34345	0.00114856	0.0173602	NW_006271971.1	-	-	sordNOG13940;opiNOG47182	S	-	hypothetical protein	18166580	-	-	-	-
CCM_07727	36.1524	4.93189	-2.87388	0.00118069	0.0177713	NW_006271974.1	GO:0055114;GO:0045329;GO:0050353;GO:0005506;GO:0031418	K00474	opiNOG08191;sordNOG11252	I	sp|Q96UB1|TMLH_NEUCR Trimethyllysine dioxygenase OS=Neurospora crassa (strain ATCC 24698 / 74-OR23-1A / CBS 708.71 / DSM 1257 / FGSC 987) GN=cbs-1 PE=2 SV=2	trimethyllysine dioxygenase	18169737	GO:0055114//obsolete oxidation-reduction process;GO:0045329//carnitine biosynthetic process;	-	GO:0050353//trimethyllysine dioxygenase activity;GO:0005506//iron ion binding;GO:0031418//L-ascorbic acid binding;	ko00310(Lysine degradation)
CCM_08514	77.9523	27.9148	-1.48156	0.0011931	0.0178927	NW_006271975.1	GO:0032259;GO:0008168	-	sorNOG07161;sordNOG05284;hypNOG03231	LR	sp|M2SNN6|LAEA_COCH5 Secondary metabolism regulator LAE1 OS=Cochliobolus heterostrophus (strain C5 / ATCC 48332 / race O) GN=LAE1 PE=3 SV=1	SAM domain methyltransferase, putative	18170521	GO:0032259//methylation;	-	GO:0008168//methyltransferase activity;	-
CCM_09580	334.898	93.9145	-1.8343	0.00121618	0.0181822	NW_006271977.1	GO:0052656;GO:0009082;GO:0052655;GO:0052654	K00826	sordNOG07068	E	sp|O14370|BCA1_SCHPO Branched-chain-amino-acid aminotransferase, mitochondrial OS=Schizosaccharomyces pombe (strain 972 / ATCC 24843) GN=eca39 PE=1 SV=3	Branched-chain amino acid aminotransferase II	18171582	GO:0009082//branched-chain amino acid biosynthetic process;	-	GO:0052656//L-isoleucine transaminase activity;GO:0052655//L-valine transaminase activity;GO:0052654//L-leucine transaminase activity;	ko00966(Glucosinolate biosynthesis);ko00770(Pantothenate and CoA biosynthesis);ko00290(Valine, leucine and isoleucine biosynthesis);ko00280(Valine, leucine and isoleucine degradation);ko00270(Cysteine and methionine metabolism)
CCM_05706	86.6291	23.3452	-1.89173	0.00122701	0.0183156	NW_006271972.1	GO:0008080;GO:0016787	-	sordNOG13476	R	-	putative acetyltransferase	18167724	-	-	GO:0008080//N-acetyltransferase activity;GO:0016787//hydrolase activity;	-
CCM_02127	362.201	180.77	-1.00263	0.00123577	0.0183892	NW_006271970.1	GO:0046854	K01082	sordNOG08102;COG1218	FP	sp|Q5BCG1|DPNP_EMENI 3&apos;(2&apos;),5&apos;-bisphosphate nucleotidase OS=Emericella nidulans (strain FGSC A4 / ATCC 38163 / CBS 112.46 / NRRL 194 / M139) GN=AN1769 PE=1 SV=1	myo-inositol-1(or 4)-monophosphatase	18164155	GO:0046854//phosphatidylinositol phosphate biosynthetic process;	-	-	ko00920(Sulfur metabolism)
CCM_05476	2073.02	455.105	-2.18746	0.00124339	0.0184741	NW_006271972.1	-	-	sordNOG13916;opiNOG44854	S	-	hypothetical protein	18167494	-	-	-	-
CCM_06442	1601.51	458.887	-1.80322	0.00130989	0.0192693	NW_006271973.1	GO:0008289	-	sordNOG08362;hypNOG04424;opiNOG02054	S	sp|Q10327|YD72_SCHPO Uncharacterized protein C32A11.02c OS=Schizosaccharomyces pombe (strain 972 / ATCC 24843) GN=SPAC32A11.02c PE=4 SV=1	Bactericidal permeability-increasing protein, alpha/beta domain	18168456	-	-	GO:0008289//lipid binding;	-
CCM_00152	347.674	119.398	-1.54195	0.00143371	0.0206322	NW_006271969.1	GO:0008080	-	NOG29681	R	sp|P13018|STA_ECOLX Streptothricin acetyltransferase OS=Escherichia coli GN=sat-1 PE=4 SV=1	streptothricin-acetyltransferase	18162187	-	-	GO:0008080//N-acetyltransferase activity;	-
CCM_02679	225.381	107.708	-1.06524	0.00144521	0.0207665	NW_006271970.1	-	-	chaNOG05296;sorNOG04809	SR	sp|D4ATM6|A7590_ARTBC Uncharacterized secreted protein ARB_07590 OS=Arthroderma benhamiae (strain ATCC MYA-4681 / CBS 112371) GN=ARB_07590 PE=1 SV=1	secreted protein	18164706	-	-	-	-
CCM_07924	83.089	31.1714	-1.41443	0.00146131	0.0208731	NW_006271974.1	GO:0006418;GO:0004812;GO:0005524	-	opiNOG33052;sordNOG08588;sorNOG08407	S	-	hypothetical protein	18169934	GO:0006418//tRNA aminoacylation for protein translation;	-	GO:0004812//aminoacyl-tRNA ligase activity;GO:0005524//ATP binding;	-
CCM_02146	1571.96	301.147	-2.38403	0.00146763	0.0209012	NW_006271970.1	GO:0004185;GO:0006508	-	pleNOG01590;opiNOG07609;sordNOG10805;sorNOG03135	O	sp|C7YQJ2|CBPYA_NECH7 Carboxypeptidase Y homolog A OS=Nectria haematococca (strain 77-13-4 / ATCC MYA-4622 / FGSC 9596 / MPVI) GN=CPYA PE=3 SV=1	carboxypeptidase Y	18164174	GO:0006508//proteolysis;	-	GO:0004185//serine-type carboxypeptidase activity;	-
CCM_01565	333.617	99.4311	-1.74642	0.00149709	0.021164	NW_006271969.1	-	-	opiNOG63387;sordNOG15341	S	-	hypothetical protein	18163596	-	-	-	-
CCM_09213	131.519	25.6241	-2.3597	0.00153658	0.0215637	NW_006271976.1	GO:0008654;GO:0004609	K01613	sordNOG06687	I	sp|P0DPA6|PSID_PSICU L-tryptophan decarboxylase psiD OS=Psilocybe cubensis GN=psiD PE=1 SV=1	phosphatidylserine decarboxylase family protein	18171216	GO:0008654//phospholipid biosynthetic process;	-	GO:0004609//phosphatidylserine decarboxylase activity;	ko00564(Glycerophospholipid metabolism)
CCM_04719	30.4889	2.23891	-3.76742	0.00155119	0.0216922	NW_006271971.1	GO:0005506;GO:0020037;GO:0016712;GO:0055114	-	COG2124;KOG0157;opiNOG02188	Q	sp|Q9Y758|CP52M_DEBHN Cytochrome P450 52A13 OS=Debaryomyces hansenii GN=CYP52A13 PE=2 SV=1	Cytochrome P450	18166740	GO:0055114//obsolete oxidation-reduction process;	-	GO:0005506//iron ion binding;GO:0020037//heme binding;GO:0016712//oxidoreductase activity, acting on paired donors, with incorporation or reduction of molecular oxygen, reduced flavin or flavoprotein as one donor, and incorporation of one atom of oxygen;	-
CCM_02035	34.0373	7.57673	-2.16747	0.0015525	0.0216922	NW_006271970.1	-	-	hypNOG00420;sordNOG12356;necNOG07362	S	-	hypothetical protein	18164064	-	-	-	-
CCM_08794	266.042	81.3312	-1.70977	0.00156044	0.0217624	NW_006271975.1	-	-	hypNOG00840;opiNOG51909;necNOG09955	S	-	hypothetical protein	18170799	-	-	-	-
CCM_05850	324.901	127.822	-1.34586	0.00156205	0.0217624	NW_006271972.1	GO:0016021	-	sordNOG12799;opiNOG42584	S	-	hypothetical protein	18167868	-	GO:0016021//integral component of membrane;	-	-
CCM_09383	1898.31	849.985	-1.15921	0.00157802	0.0219212	NW_006271977.1	GO:0008531;GO:0009231;GO:0016310	K00861	opiNOG34930;sordNOG11645	H	sp|A4QQ05|RIFK_MAGO7 Riboflavin kinase OS=Magnaporthe oryzae (strain 70-15 / ATCC MYA-4617 / FGSC 8958) GN=FMN1 PE=3 SV=3	Riboflavin kinase	18171386	GO:0009231//riboflavin biosynthetic process;GO:0016310//phosphorylation;	-	GO:0008531//riboflavin kinase activity;	ko00740(Riboflavin metabolism)
CCM_01945	14.9519	0.960566	-3.9603	0.00159858	0.0221111	NW_006271970.1	GO:0008171;GO:0032259	-	sordNOG08908;opiNOG11885;pleNOG08061	SR	sp|D7UQ43|SOL2_ALTSO O-methyltransferase sol2 OS=Alternaria solani GN=sol2 PE=3 SV=1	O-methyltransferase, putative	18163974	GO:0032259//methylation;	-	GO:0008171//O-methyltransferase activity;	-
CCM_07085	751.913	94.1375	-2.99772	0.00163048	0.0224835	NW_006271973.1	GO:0004185;GO:0006508	-	opiNOG16370;opiNOG18368;pleNOG08261	OE	sp|C5FW30|SPCA_ARTOC Carboxypeptidase S1 homolog A OS=Arthroderma otae (strain ATCC MYA-4605 / CBS 113480) GN=SCPA PE=3 SV=1	serine carboxypeptidase, putative	18169096	GO:0006508//proteolysis;	-	GO:0004185//serine-type carboxypeptidase activity;	-
CCM_08012	1318.46	277.868	-2.24638	0.00163253	0.0224835	NW_006271974.1	GO:0055114;GO:0004497;GO:0020037;GO:0005506;GO:0016705	-	opiNOG11398;COG2124	Q	sp|A0A1B4XBH0|SDNE_SORAA Cytochrome P450 monooxygenase sdnE OS=Sordaria araneosa GN=sdnE PE=3 SV=1	Cytochrome P450	18170021	GO:0055114//obsolete oxidation-reduction process;	-	GO:0004497//monooxygenase activity;GO:0020037//heme binding;GO:0005506//iron ion binding;GO:0016705//oxidoreductase activity, acting on paired donors, with incorporation or reduction of molecular oxygen;	-
CCM_03859	40.5235	10.7593	-1.91318	0.00164917	0.0226331	NW_006271971.1	-	-	-	-	-	hypothetical protein	18165882	-	-	-	-
CCM_06796	808.911	139.358	-2.53719	0.00165152	0.0226331	NW_006271973.1	GO:0008152;GO:0055085;GO:0016846;GO:0016021	K15111	opiNOG04502;sordNOG11647	C	sp|O60029|PET8_ASHGO Putative mitochondrial carrier protein PET8 OS=Ashbya gossypii (strain ATCC 10895 / CBS 109.51 / FGSC 9923 / NRRL Y-1056) GN=PET8 PE=3 SV=1	Mitochondrial carrier protein PET8	18168807	GO:0008152//metabolic process;GO:0055085//transmembrane transport;	GO:0016021//integral component of membrane;	GO:0016846//carbon-sulfur lyase activity;	-
CCM_01009	1139.33	523.45	-1.12206	0.00165281	0.0226331	NW_006271969.1	-	-	hypNOG13688;opiNOG36354;sordNOG07999	S	sp|Q9UV10|HET6_NEUCR Heterokaryon incompatibility protein 6, OR allele OS=Neurospora crassa (strain ATCC 24698 / 74-OR23-1A / CBS 708.71 / DSM 1257 / FGSC 987) GN=het-6 PE=4 SV=1	Heterokaryon incompatibility	18163042	-	-	-	-
CCM_07359	119.772	51.4035	-1.22035	0.00167275	0.0228087	NW_006271974.1	GO:0016021	K23678	sordNOG07014	S	sp|Q12010|YPQ1_YEAST Probable vacuolar amino acid transporter YPQ1 OS=Saccharomyces cerevisiae (strain ATCC 204508 / S288c) GN=YPQ1 PE=1 SV=1	PQ loop repeat protein	18169370	-	GO:0016021//integral component of membrane;	-	-
CCM_08011	59.5359	16.9713	-1.81066	0.00176771	0.0238378	NW_006271974.1	GO:0055085;GO:0016021	K22134	sordNOG05255;opiNOG03023	R	sp|E9R876|GLIA_ASPFU MFS gliotoxin efflux transporter gliA OS=Neosartorya fumigata (strain ATCC MYA-4609 / Af293 / CBS 101355 / FGSC A1100) GN=gliA PE=2 SV=1	MFS multidrug transporter	18170020	GO:0055085//transmembrane transport;	GO:0016021//integral component of membrane;	-	-
CCM_02162	105.959	36.6345	-1.53224	0.00177037	0.0238378	NW_006271970.1	GO:0016021	-	sordNOG13967;opiNOG39284	S	-	hypothetical protein	18164190	-	GO:0016021//integral component of membrane;	-	-
CCM_09656	139.423	60.9673	-1.19336	0.00185489	0.0246968	NW_006271978.1	GO:0016021	-	sordNOG07363	E	sp|P38680|MTR_NEUCR N amino acid transport system protein OS=Neurospora crassa (strain ATCC 24698 / 74-OR23-1A / CBS 708.71 / DSM 1257 / FGSC 987) GN=mtr PE=3 SV=2	amino acid transporter	18171658	-	GO:0016021//integral component of membrane;	-	-
CCM_00020	216.647	105.498	-1.03813	0.00186576	0.0248052	NW_006271969.1	GO:0055114;GO:0003884;GO:0046416;GO:0071949	K00273	opiNOG02584;sorNOG04497;sordNOG06105	E	sp|P24552|OXDA_FUSSO D-amino-acid oxidase OS=Fusarium solani subsp. pisi PE=1 SV=1	D-amino-acid oxidase	18162055	GO:0055114//obsolete oxidation-reduction process;GO:0046416//D-amino acid metabolic process;	-	GO:0003884//D-amino-acid oxidase activity;GO:0071949//FAD binding;	ko04146(Peroxisome);ko00470(D-Amino acid metabolism);ko00330(Arginine and proline metabolism);ko00311(Penicillin and cephalosporin biosynthesis);ko00260(Glycine, serine and threonine metabolism)
CCM_09376	2434.87	582.516	-2.06348	0.00187584	0.0248381	NW_006271977.1	GO:0043531	-	opiNOG48617;sordNOG13490;opiNOG23383	SR	-	Tetratricopeptide-like helical	18171379	-	-	GO:0043531//ADP binding;	-
CCM_01175	185.595	87.5147	-1.08456	0.00188129	0.0248418	NW_006271969.1	GO:0016021;GO:0055085	-	sorNOG00574;magNOG05136;opiNOG14145;sordNOG09387;opiNOG13802	G	sp|Q5ATG7|APDF_EMENI Aspyridones efflux protein apdF OS=Emericella nidulans (strain FGSC A4 / ATCC 38163 / CBS 112.46 / NRRL 194 / M139) GN=apdF PE=2 SV=1	MFS monocarboxylate transporter, putative	18163207	GO:0055085//transmembrane transport;	GO:0016021//integral component of membrane;	-	-
CCM_04509	52.8218	15.4347	-1.77496	0.00189323	0.0249652	NW_006271971.1	-	-	-	-	-	hypothetical protein	18166532	-	-	-	-
CCM_08106	81.1004	27.3941	-1.56585	0.00197452	0.0257545	NW_006271974.1	-	-	sordNOG13598;magNOG12703;sorNOG08440;opiNOG47764	R	-	hypothetical protein	18170115	-	-	-	-
CCM_09208	4290.89	1493.59	-1.52249	0.00198792	0.0258942	NW_006271976.1	GO:0004037;GO:0000256	K01477	sorNOG01663;opiNOG00319;opiNOG06793	RF	sp|P18407|ALLC_NEUCR Allantoicase OS=Neurospora crassa (strain ATCC 24698 / 74-OR23-1A / CBS 708.71 / DSM 1257 / FGSC 987) GN=alc-1 PE=2 SV=2	allantoicase	18171211	GO:0000256//allantoin catabolic process;	-	GO:0004037//allantoicase activity;	ko00230(Purine metabolism)
CCM_08159	256.735	127.421	-1.01068	0.00201399	0.0261982	NW_006271974.1	GO:0016021;GO:0006067;GO:0005743	K13348	opiNOG31435;opiNOG34890	R	sp|Q4IPX8|SYM1_GIBZE Protein SYM1 OS=Gibberella zeae (strain PH-1 / ATCC MYA-4620 / FGSC 9075 / NRRL 31084) GN=SYM1 PE=3 SV=1	integral membrane protein, Mpv17/PMP22 family, putative	18170168	GO:0006067//ethanol metabolic process;	GO:0016021//integral component of membrane;GO:0005743//mitochondrial inner membrane;	-	ko04146(Peroxisome)
CCM_05773	1887.76	10.3337	-7.51317	0.00205705	0.0266321	NW_006271972.1	-	-	necNOG12968;opiNOG60451;sordNOG15713;opiNOG45647	S	-	hypothetical protein	18167791	-	-	-	-
CCM_06562	313.662	148.834	-1.07551	0.0020954	0.0270741	NW_006271973.1	GO:0016491;GO:0055114	K00065	sorNOG03832;sordNOG09557	Q	sp|P50842|KDUD_BACSU 2-dehydro-3-deoxy-D-gluconate 5-dehydrogenase OS=Bacillus subtilis (strain 168) GN=kduD PE=2 SV=1	2-deoxy-D-gluconate 3-dehydrogenase	18168576	GO:0055114//obsolete oxidation-reduction process;	-	GO:0016491//oxidoreductase activity;	ko00040(Pentose and glucuronate interconversions)
CCM_01944	24.1852	2.8826	-3.06868	0.00215727	0.0277974	NW_006271970.1	GO:0016021;GO:0004497;GO:0055114;GO:0016705;GO:0020037;GO:0005506	-	opiNOG55648;COG2124;opiNOG57135	Q	sp|Q9C449|PAXP_PENPX Cytochrome P450 monooxygenase paxP OS=Penicillium paxilli GN=paxP PE=1 SV=1	cytochrome P450, putative	18163973	GO:0055114//obsolete oxidation-reduction process;	GO:0016021//integral component of membrane;	GO:0004497//monooxygenase activity;GO:0016705//oxidoreductase activity, acting on paired donors, with incorporation or reduction of molecular oxygen;GO:0020037//heme binding;GO:0005506//iron ion binding;	-
CCM_04239	391.242	190.025	-1.04187	0.00216874	0.0277974	NW_006271971.1	GO:0004400;GO:0000105;GO:0030170	K00817	sordNOG05998;opiNOG07898	E	sp|P36605|HIS8_SCHPO Histidinol-phosphate aminotransferase OS=Schizosaccharomyces pombe (strain 972 / ATCC 24843) GN=his3 PE=3 SV=1	histidinol-phosphate aminotransferase	18166262	GO:0000105//histidine biosynthetic process;	-	GO:0004400//histidinol-phosphate transaminase activity;GO:0030170//pyridoxal phosphate binding;	ko00960(Tropane, piperidine and pyridine alkaloid biosynthesis);ko00401(Novobiocin biosynthesis);ko00400(Phenylalanine, tyrosine and tryptophan biosynthesis);ko00360(Phenylalanine metabolism);ko00350(Tyrosine metabolism);ko00340(Histidine metabolism)
CCM_00047	190.505	72.5216	-1.39334	0.0022035	0.0281364	NW_006271969.1	-	-	sordNOG04483;opiNOG19197	S	-	hypothetical protein	18162082	-	-	-	-
CCM_07981	93.3441	24.8898	-1.907	0.00225173	0.0284485	NW_006271974.1	-	-	-	-	-	hypothetical protein	18169991	-	-	-	-
CCM_06549	223.988	111.724	-1.00349	0.00225547	0.0284538	NW_006271973.1	GO:0016301;GO:0016310	-	opiNOG41449;sordNOG13988	R	-	Protein kinase-like domain	18168563	GO:0016310//phosphorylation;	-	GO:0016301//kinase activity;	-
CCM_08007	16.7317	1.64427	-3.34707	0.00231566	0.0290305	NW_006271974.1	-	-	-	-	-	hypothetical protein	18170016	-	-	-	-
CCM_08218	44.8538	13.4077	-1.74217	0.00235983	0.0294994	NW_006271974.1	-	-	-	-	-	hypothetical protein	18170226	-	-	-	-
CCM_07352	1150.08	469.476	-1.29261	0.00237342	0.0296052	NW_006271974.1	GO:0016021;GO:0055085	-	sordNOG04251	R	sp|G3XMC9|AZAK_ASPNA Efflux pump azaK OS=Aspergillus niger (strain ATCC 1015 / CBS 113.46 / FGSC A1144 / LSHB Ac4 / NCTC 3858a / NRRL 328 / USDA 3528.7) GN=azaK PE=2 SV=1	Major facilitator superfamily transporter	18169363	GO:0055085//transmembrane transport;	GO:0016021//integral component of membrane;	-	-
CCM_02723	63.0186	22.5119	-1.48509	0.00237445	0.0296052	NW_006271970.1	GO:0016021;GO:0055085;GO:0005215	-	necNOG12699;sordNOG04251	R	sp|G3XMC9|AZAK_ASPNA Efflux pump azaK OS=Aspergillus niger (strain ATCC 1015 / CBS 113.46 / FGSC A1144 / LSHB Ac4 / NCTC 3858a / NRRL 328 / USDA 3528.7) GN=azaK PE=2 SV=1	Major facilitator superfamily transporter	18164750	GO:0055085//transmembrane transport;	GO:0016021//integral component of membrane;	GO:0005215//transporter activity;	-
CCM_03749	1974.94	956.366	-1.04618	0.00240549	0.0298789	NW_006271971.1	GO:0055114;GO:0019878;GO:0004754	K00290	opiNOG03462;sordNOG07501;NOG13157	E	sp|Q09694|LYS1_SCHPO Saccharopine dehydrogenase [NAD(+), L-lysine-forming] OS=Schizosaccharomyces pombe (strain 972 / ATCC 24843) GN=lys3 PE=1 SV=2	saccharopine dehydrogenase	18165772	GO:0055114//obsolete oxidation-reduction process;GO:0019878//lysine biosynthetic process via aminoadipic acid;	-	GO:0004754//saccharopine dehydrogenase (NAD+, L-lysine-forming) activity;	ko00310(Lysine degradation);ko00300(Lysine biosynthesis)
CCM_05921	145.834	67.5049	-1.11127	0.00247455	0.0304742	NW_006271972.1	-	-	sordNOG07269	S	-	hypothetical protein	18167939	-	-	-	-
CCM_06148	818.416	305.325	-1.42249	0.00251179	0.0307983	NW_006271972.1	-	-	-	-	-	hypothetical protein	18168163	-	-	-	-
CCM_00328	176.406	84.8267	-1.05631	0.00255323	0.0311585	NW_006271969.1	-	-	opiNOG43020;sorNOG08392;sordNOG14246	R	-	hypothetical protein	18162363	-	-	-	-
CCM_00116	29896.7	12264.9	-1.28545	0.00256067	0.0311986	NW_006271969.1	GO:0043086;GO:0051879;GO:0003729;GO:0005634;GO:0005829;GO:0006457;GO:0042030;GO:0030544	K09553	sorNOG02559;opiNOG00314;sordNOG05038	O	sp|Q9USI5|STI1_SCHPO Heat shock protein sti1 homolog OS=Schizosaccharomyces pombe (strain 972 / ATCC 24843) GN=sti1 PE=3 SV=1	heat shock protein	18162151	GO:0043086//negative regulation of catalytic activity;GO:0006457//protein folding;	GO:0005634//nucleus;GO:0005829//cytosol;	GO:0051879//Hsp90 protein binding;GO:0003729//mRNA binding;GO:0042030//ATPase inhibitor activity;GO:0030544//Hsp70 protein binding;	ko05020(Prion disease)
CCM_09010	35.2477	8.90774	-1.9844	0.00260344	0.0315059	NW_006271975.1	-	-	sordNOG12558;opiNOG31555	S	-	NAD(P)-binding domain	18171014	-	-	-	-
CCM_05076	3587.35	1760.83	-1.02667	0.00267299	0.0320882	NW_006271972.1	-	-	sordNOG05193;hypNOG07968;sordNOG10327	S	-	hypothetical protein	18167096	-	-	-	-
CCM_01544	441.794	99.6957	-2.14777	0.00267374	0.0320882	NW_006271969.1	GO:0005509	-	sordNOG08594;COG5126	ZRTD	sp|Q9UUG5|MLR1_SCHPO Myosin regulatory light chain 1 OS=Schizosaccharomyces pombe (strain 972 / ATCC 24843) GN=rlc1 PE=1 SV=1	calmodulin, putative	18163575	-	-	GO:0005509//calcium ion binding;	-
CCM_06869	136.248	53.3927	-1.35152	0.00268973	0.0322399	NW_006271973.1	GO:0016021;GO:0006798;GO:0000298;GO:0000329;GO:0005634;GO:0004309	K06018	sordNOG07890;opiNOG02001	I	sp|Q9P3S1|PPN1_NEUCR Endopolyphosphatase OS=Neurospora crassa (strain ATCC 24698 / 74-OR23-1A / CBS 708.71 / DSM 1257 / FGSC 987) GN=epp-1 PE=3 SV=3	endopolyphosphatase	18168880	GO:0006798//polyphosphate catabolic process;	GO:0016021//integral component of membrane;GO:0000329//fungal-type vacuole membrane;GO:0005634//nucleus;	GO:0000298//endopolyphosphatase activity;GO:0004309//exopolyphosphatase activity;	-
CCM_02647	358.749	157.122	-1.19109	0.00276071	0.0330084	NW_006271970.1	GO:0000407;GO:0005634;GO:0005829;GO:0016236	K19730	opiNOG09719;sordNOG11748	S	sp|F4K265|AT101_ARATH Autophagy-related protein 101 OS=Arabidopsis thaliana GN=ATG101 PE=1 SV=1	DUF1649 domain protein	18164674	GO:0016236//macroautophagy;	GO:0000407//phagophore assembly site;GO:0005634//nucleus;GO:0005829//cytosol;	-	ko05022(Pathways of neurodegeneration - multiple diseases);ko05017(Spinocerebellar ataxia);ko05016(Huntington disease);ko05014(Amyotrophic lateral sclerosis);ko05010(Alzheimer disease);ko04211(Longevity regulating pathway);ko04140(Autophagy - animal);ko04136(Autophagy - other)
CCM_04491	77.8937	30.5323	-1.35117	0.00278809	0.0331707	NW_006271971.1	-	-	-	-	-	hypothetical protein	18166514	-	-	-	-
CCM_02454	1504.91	717.538	-1.06855	0.00279856	0.0331795	NW_006271970.1	GO:0070469;GO:0046872;GO:0009055;GO:0005739;GO:0020037;GO:0055114	K08738	opiNOG33270;sordNOG13202;sorNOG05266	C	sp|P00048|CYC_NEUCR Cytochrome c OS=Neurospora crassa (strain ATCC 24698 / 74-OR23-1A / CBS 708.71 / DSM 1257 / FGSC 987) GN=cyc-1 PE=1 SV=2	cytochrome c	18164481	GO:0055114//obsolete oxidation-reduction process;	GO:0070469//respirasome;GO:0005739//mitochondrion;	GO:0046872//metal ion binding;GO:0009055//electron transfer activity;GO:0020037//heme binding;	ko05417(Lipid and atherosclerosis);ko05416(Viral myocarditis);ko05222(Small cell lung cancer);ko05210(Colorectal cancer);ko05200(Pathways in cancer);ko05170(Human immunodeficiency virus 1 infection);ko05169(Epstein-Barr virus infection);ko05168(Herpes simplex virus 1 infection);ko05167(Kaposi sarcoma-associated herpesvirus infection);ko05164(Influenza A);ko05163(Human cytomegalovirus infection);k…
CCM_05737	40.7084	11.5962	-1.81167	0.00289401	0.0339684	NW_006271972.1	-	-	-	-	-	hypothetical protein	18167755	-	-	-	-
CCM_01107	23.4521	2.96714	-2.98257	0.00293432	0.0343996	NW_006271969.1	-	-	-	-	-	hypothetical protein	18163140	-	-	-	-
CCM_05627	36.2836	9.58149	-1.92099	0.00295452	0.0345521	NW_006271972.1	GO:0006508;GO:0004185	K01288	sorNOG03489;sordNOG06057	OE	sp|D4B0Q6|SCPD_ARTBC Carboxypeptidase Y homolog ARB_02032 OS=Arthroderma benhamiae (strain ATCC MYA-4681 / CBS 112371) GN=ARB_02032 PE=3 SV=2	carboxypeptidase cpdS precursor	18167645	GO:0006508//proteolysis;	-	GO:0004185//serine-type carboxypeptidase activity;	-
CCM_00771	101.986	28.4131	-1.84374	0.00300215	0.0349563	NW_006271969.1	GO:0016021;GO:0055085	-	euroNOG06742;pleNOG08082;opiNOG07079	R	sp|O94343|YHMA_SCHPO Uncharacterized MFS-type transporter C1271.10c OS=Schizosaccharomyces pombe (strain 972 / ATCC 24843) GN=SPBC1271.10c PE=1 SV=1	Major facilitator superfamily transporter	18162805	GO:0055085//transmembrane transport;	GO:0016021//integral component of membrane;	-	-
CCM_02302	1977.21	359.68	-2.45868	0.00300427	0.0349563	NW_006271970.1	-	-	-	-	-	hypothetical protein	18164329	-	-	-	-
CCM_00947	2639.42	982.461	-1.42575	0.00300726	0.0349563	NW_006271969.1	-	-	opiNOG14310;COG2335;necNOG11914;sordNOG04736	MSWR	sp|D4B388|FLA_ARTBC Fasciclin-like arabinogalactan protein ARB_02922 OS=Arthroderma benhamiae (strain ATCC MYA-4681 / CBS 112371) GN=ARB_02922 PE=3 SV=1	beta-Ig-H3/Fasciclin	18162980	-	-	-	-
CCM_05289	195.881	76.6933	-1.3528	0.00303412	0.0351833	NW_006271972.1	GO:0008152;GO:0016829	K18123	COG0329;pleNOG02553	RE	sp|Q5BD77|HOGA1_EMENI Probable 4-hydroxy-2-oxoglutarate aldolase, mitochondrial OS=Emericella nidulans (strain FGSC A4 / ATCC 38163 / CBS 112.46 / NRRL 194 / M139) GN=AN1503 PE=1 SV=1	dihydrodipicolinate synthase	18167307	GO:0008152//metabolic process;	-	GO:0016829//lyase activity;	ko00630(Glyoxylate and dicarboxylate metabolism);ko00330(Arginine and proline metabolism)
CCM_09602	145583	47181.4	-1.62555	0.00307104	0.0353157	NW_006271978.1	-	-	opiNOG11011	S	-	hypothetical protein	18171604	-	-	-	-
CCM_09609	59.6381	21.5231	-1.47035	0.0031023	0.0355876	NW_006271978.1	-	-	-	-	-	hypothetical protein	18171611	-	-	-	-
CCM_02708	30.0401	7.28384	-2.04412	0.00317898	0.0361652	NW_006271970.1	-	-	-	-	-	hypothetical protein	18164735	-	-	-	-
CCM_04253	177.631	51.8343	-1.7769	0.00318793	0.0361689	NW_006271971.1	-	-	opiNOG43301;opiNOG60496;euroNOG13081;eurotNOG13000	RS	-	hypothetical protein	18166276	-	-	-	-
CCM_09586	123.543	55.7301	-1.14848	0.00322809	0.036465	NW_006271978.1	-	-	-	-	-	hypothetical protein	18171588	-	-	-	-
CCM_00826	841.137	49.2859	-4.09309	0.00332768	0.0373703	NW_006271969.1	GO:0006508;GO:0004190	-	KOG1339;sordNOG05838	O	sp|P11838|CARP_CRYPA Endothiapepsin OS=Cryphonectria parasitica GN=EAPA PE=1 SV=2	endothiapepsin precursor	18162860	GO:0006508//proteolysis;	-	GO:0004190//aspartic-type endopeptidase activity;	-
CCM_06444	80.2793	23.8119	-1.75334	0.00340394	0.0379147	NW_006271973.1	-	-	opiNOG68139	R	-	hypothetical protein	18168458	-	-	-	-
CCM_03631	654.346	141.739	-2.20682	0.00341046	0.0379147	NW_006271971.1	GO:0008152;GO:0016787	-	COG1473;opiNOG17017	ER	sp|A3KG59|P20D2_MOUSE Peptidase M20 domain-containing protein 2 OS=Mus musculus GN=Pm20d2 PE=1 SV=1	amidohydrolase, putative	18165657	GO:0008152//metabolic process;	-	GO:0016787//hydrolase activity;	-
CCM_03231	92.9308	20.2635	-2.19728	0.00345333	0.0382453	NW_006271970.1	GO:0008152;GO:0016787	K12350	sordNOG09160;opiNOG14637	IG	sp|Q04519|ASM_MOUSE Sphingomyelin phosphodiesterase OS=Mus musculus GN=Smpd1 PE=1 SV=2	acid sphingomyelinase, putative	18165257	GO:0008152//metabolic process;	-	GO:0016787//hydrolase activity;	ko04217(Necroptosis);ko04142(Lysosome);ko04071(Sphingolipid signaling pathway);ko00600(Sphingolipid metabolism)
CCM_04661	92.3646	39.7404	-1.21673	0.00346041	0.0382629	NW_006271971.1	-	-	sordNOG15293	S	-	hypothetical protein	18166683	-	-	-	-
CCM_04689	1066.32	446.619	-1.25553	0.00354122	0.0389605	NW_006271971.1	GO:0009082;GO:0052655;GO:0052654;GO:0052656	K00826	sordNOG05611	E	sp|P47176|BCA2_YEAST Branched-chain-amino-acid aminotransferase, cytosolic OS=Saccharomyces cerevisiae (strain ATCC 204508 / S288c) GN=BAT2 PE=1 SV=1	branched-chain amino acid aminotransferase, cytosolic	18166711	GO:0009082//branched-chain amino acid biosynthetic process;	-	GO:0052655//L-valine transaminase activity;GO:0052654//L-leucine transaminase activity;GO:0052656//L-isoleucine transaminase activity;	ko00966(Glucosinolate biosynthesis);ko00770(Pantothenate and CoA biosynthesis);ko00290(Valine, leucine and isoleucine biosynthesis);ko00280(Valine, leucine and isoleucine degradation);ko00270(Cysteine and methionine metabolism)
CCM_03274	233.099	102.618	-1.18366	0.00354223	0.0389605	NW_006271970.1	GO:0016021	-	hypNOG07462;sordNOG07562;opiNOG03137	S	-	Regulator of G protein signaling superfamily	18165300	-	GO:0016021//integral component of membrane;	-	-
CCM_00276	18.6273	2.77661	-2.74602	0.00377206	0.0407883	NW_006271969.1	-	-	-	-	-	hypothetical protein	18162311	-	-	-	-
CCM_01457	1768.86	178.592	-3.30809	0.00382616	0.0412805	NW_006271969.1	-	-	sorNOG04957;sordNOG13280;opiNOG36609	S	-	hypothetical protein	18163488	-	-	-	-
CCM_04147	184.117	91.5848	-1.00744	0.00386713	0.0416248	NW_006271971.1	-	-	-	-	-	hypothetical protein	18166170	-	-	-	-
CCM_00711	78.1495	32.1424	-1.28176	0.00387107	0.0416248	NW_006271969.1	GO:0032153;GO:0051286;GO:0016021	K21989	sordNOG11571	S	sp|O43022|YGV8_SCHPO Uncharacterized protein C354.08c OS=Schizosaccharomyces pombe (strain 972 / ATCC 24843) GN=SPBC354.08c PE=3 SV=1	DUF221 domain protein, putative	18162745	-	GO:0032153//cell division site;GO:0051286//cell tip;GO:0016021//integral component of membrane;	-	-
CCM_06923	99.3291	14.9657	-2.73056	0.0039105	0.041955	NW_006271973.1	GO:0046872;GO:0016491;GO:0055114	-	sordNOG07078;pleNOG07256;opiNOG23784	SQ	sp|D7PHZ1|VRTI_PENAE Oxidoreductase vrtI OS=Penicillium aethiopicum GN=vrtI PE=1 SV=1	2OG-Fe(II) oxygenase family oxidoreductase, putative	18168934	GO:0055114//obsolete oxidation-reduction process;	-	GO:0046872//metal ion binding;GO:0016491//oxidoreductase activity;	-
CCM_05301	242.458	35.2404	-2.78243	0.0041131	0.0435934	NW_006271972.1	GO:0000981;GO:0005634;GO:0008270;GO:0003677;GO:0006357	-	opiNOG16598;sordNOG09251;sorNOG02651	S	sp|P28349|NIT4_NEUCR Nitrogen assimilation transcription factor nit-4 OS=Neurospora crassa (strain ATCC 24698 / 74-OR23-1A / CBS 708.71 / DSM 1257 / FGSC 987) GN=nit-4 PE=4 SV=2	pathway-specific nitrogen regulator	18167319	GO:0006357//regulation of transcription by RNA polymerase II;	GO:0005634//nucleus;	GO:0000981//DNA-binding transcription factor activity, RNA polymerase II-specific;GO:0008270//zinc ion binding;GO:0003677//DNA binding;	-
CCM_04804	135950	43120.6	-1.65662	0.00412657	0.0436149	NW_006271971.1	GO:0005524	K03283	sordNOG10587;opiNOG02241	O	sp|Q01233|HSP70_NEUCR Heat shock 70 kDa protein OS=Neurospora crassa (strain ATCC 24698 / 74-OR23-1A / CBS 708.71 / DSM 1257 / FGSC 987) GN=hsps-1 PE=2 SV=2	heat shock 70 kDa protein	18166825	-	-	GO:0005524//ATP binding;	ko05417(Lipid and atherosclerosis);ko05162(Measles);ko05145(Toxoplasmosis);ko05134(Legionellosis);ko05020(Prion disease);ko04915(Estrogen signaling pathway);ko04612(Antigen processing and presentation);ko04213(Longevity regulating pathway - multiple species);ko04144(Endocytosis);ko04141(Protein processing in endoplasmic reticulum);ko04010(MAPK signaling pathway);ko03040(Spliceosome)
CCM_03608	64.6691	12.1936	-2.40696	0.00417881	0.0439241	NW_006271970.1	-	-	opiNOG28140;sorNOG07890	R	sp|Q8G9F9|INHA_PSEPU Isonitrile hydratase OS=Pseudomonas putida GN=inhA PE=1 SV=1	ThiJ/PfpI	18165634	-	-	-	-
CCM_00986	1771.26	384.075	-2.20531	0.00418085	0.0439241	NW_006271969.1	GO:0008152;GO:0008484	-	sordNOG08623	R	sp|O69787|BETC_RHIME Choline-sulfatase OS=Rhizobium meliloti (strain 1021) GN=betC PE=1 SV=2	sulfatase	18163019	GO:0008152//metabolic process;	-	GO:0008484//sulfuric ester hydrolase activity;	-
CCM_03982	51.6454	18.0582	-1.51598	0.00426714	0.0444903	NW_006271971.1	GO:0055114;GO:0016491;GO:0005840	K00059	sordNOG08776;opiNOG19571;sorNOG06672	Q	sp|Q00791|STCU_EMENI Versicolorin reductase OS=Emericella nidulans (strain FGSC A4 / ATCC 38163 / CBS 112.46 / NRRL 194 / M139) GN=stcU PE=3 SV=2	60S ribosomal protein L40	18166005	GO:0055114//obsolete oxidation-reduction process;	GO:0005840//ribosome;	GO:0016491//oxidoreductase activity;	ko00780(Biotin metabolism);ko00333(Prodigiosin biosynthesis);ko00061(Fatty acid biosynthesis)
CCM_02862	197.914	76.3387	-1.37439	0.00440691	0.0455523	NW_006271970.1	GO:0006836;GO:0016021;GO:0005328;GO:0055085	K05034	opiNOG00915;sordNOG10913	P	sp|Q7K4Y6|DAT_DROME Sodium-dependent dopamine transporter OS=Drosophila melanogaster GN=DAT PE=1 SV=1	sodium/chloride dependent neurotransmitter transporter, putative	18164889	GO:0006836//neurotransmitter transport;GO:0055085//transmembrane transport;	GO:0016021//integral component of membrane;	GO:0005328//neurotransmitter:sodium symporter activity;	ko04727(GABAergic synapse);ko04721(Synaptic vesicle cycle)
CCM_06395	12284.3	4565.53	-1.42796	0.00451376	0.0465068	NW_006271972.1	GO:0005524;GO:1900035;GO:0046872;GO:0005634;GO:0006457;GO:0000226;GO:0051082;GO:0031072	K09503	sordNOG11121;sorNOG04123	O	sp|O74752|MAS5_SCHPO Mitochondrial protein import protein mas5 OS=Schizosaccharomyces pombe (strain 972 / ATCC 24843) GN=mas5 PE=3 SV=1	mitochondrial protein import protein MAS5	18168409	GO:1900035//negative regulation of cellular response to heat;GO:0006457//protein folding;GO:0000226//microtubule cytoskeleton organization;	GO:0005634//nucleus;	GO:0005524//ATP binding;GO:0046872//metal ion binding;GO:0051082//unfolded protein binding;GO:0031072//heat shock protein binding;	ko04141(Protein processing in endoplasmic reticulum)
CCM_05298	3930.17	1683.82	-1.22286	0.00453936	0.0467136	NW_006271972.1	GO:0022891;GO:0055085;GO:0008643;GO:0016021	-	sordNOG06042	R	sp|Q8VZR6|INT1_ARATH Inositol transporter 1 OS=Arabidopsis thaliana GN=INT1 PE=1 SV=1	plastidic glucose transporter 4	18167316	GO:0055085//transmembrane transport;GO:0008643//carbohydrate transport;	GO:0016021//integral component of membrane;	-	-
CCM_09652	1232.39	477.018	-1.36935	0.00462939	0.0473933	NW_006271978.1	GO:0042802;GO:0003935;GO:0005829;GO:0009231	K01497	opiNOG04985;sordNOG07720	H	sp|Q9P7M9|RIB1_SCHPO Probable GTP cyclohydrolase-2 OS=Schizosaccharomyces pombe (strain 972 / ATCC 24843) GN=rib1 PE=3 SV=1	GTP cyclohydrolase-2	18171654	GO:0009231//riboflavin biosynthetic process;	GO:0005829//cytosol;	GO:0042802//identical protein binding;GO:0003935//GTP cyclohydrolase II activity;	ko02024(Quorum sensing);ko00790(Folate biosynthesis);ko00740(Riboflavin metabolism)
CCM_09375	756.399	239.968	-1.6563	0.004641	0.0474616	NW_006271977.1	GO:0016884	K01426	opiNOG52216;COG0154;sordNOG08113	J	sp|Q9URY4|YI01_SCHPO Putative amidase C869.01 OS=Schizosaccharomyces pombe (strain 972 / ATCC 24843) GN=SPAC869.01 PE=3 SV=1	amidase family protein	18171378	-	-	GO:0016884//carbon-nitrogen ligase activity, with glutamine as amido-N-donor;	ko00643(Styrene degradation);ko00627(Aminobenzoate degradation);ko00380(Tryptophan metabolism);ko00360(Phenylalanine metabolism);ko00330(Arginine and proline metabolism)
CCM_03788	2475.65	464.61	-2.41372	0.00470452	0.0478512	NW_006271971.1	GO:0022626;GO:0050790;GO:0000774;GO:0002181;GO:0071629;GO:0005634	K09562	sordNOG08193;sordNOG10808	O	sp|Q4I624|FES1_GIBZE Hsp70 nucleotide exchange factor FES1 OS=Gibberella zeae (strain PH-1 / ATCC MYA-4620 / FGSC 9075 / NRRL 31084) GN=FES1 PE=3 SV=1	Hsp70 nucleotide exchange factor (Fes1), putative	18165811	GO:0050790//regulation of catalytic activity;GO:0002181//cytoplasmic translation;GO:0071629//cytoplasm protein quality control by the ubiquitin-proteasome system;	GO:0022626//cytosolic ribosome;GO:0005634//nucleus;	GO:0000774//adenyl-nucleotide exchange factor activity;	ko04141(Protein processing in endoplasmic reticulum)
CCM_05915	104.202	47.7893	-1.12462	0.00478293	0.0483982	NW_006271972.1	GO:0016021	-	sordNOG14746;sorNOG05757;opiNOG39409	R	sp|D4AUF4|WSCD2_ARTBC WSC domain-containing protein ARB_07870 OS=Arthroderma benhamiae (strain ATCC MYA-4681 / CBS 112371) GN=ARB_07870 PE=1 SV=1	Carbohydrate-binding WSC	18167933	-	GO:0016021//integral component of membrane;	-	-
CCM_04819	38.0013	9.44002	-2.00919	0.00480338	0.0485031	NW_006271971.1	GO:0016021	-	-	-	-	hypothetical protein	18166840	-	GO:0016021//integral component of membrane;	-	-
CCM_03774	20.1104	0.319586	-5.97559	0.00481673	0.0485868	NW_006271971.1	-	-	-	-	-	hypothetical protein	18165797	-	-	-	-
CCM_01904	457.11	168.919	-1.43621	0.00486598	0.0489425	NW_006271969.1	GO:0005975;GO:0016787;GO:0030246	-	COG1554;opiNOG04245	G	sp|D4B5H9|ATC1_ARTBC Cell wall acid trehalase ARB_03719 OS=Arthroderma benhamiae (strain ATCC MYA-4681 / CBS 112371) GN=ARB_03719 PE=1 SV=1	alpha,alpha-trehalose glucohydrolase TreA/Ath1	18163933	GO:0005975//carbohydrate metabolic process;	-	GO:0016787//hydrolase activity;GO:0030246//carbohydrate binding;	-
CCM_02164	485.708	233.714	-1.05534	0.00487236	0.0489425	NW_006271970.1	GO:0005634;GO:0003684;GO:0006289	K10847	opiNOG16804;sordNOG06097	L	sp|O59753|RAD14_SCHPO DNA repair protein rad14 OS=Schizosaccharomyces pombe (strain 972 / ATCC 24843) GN=rhp14 PE=1 SV=1	DNA repair protein Rad14, putative	18164192	GO:0006289//nucleotide-excision repair;	GO:0005634//nucleus;	GO:0003684//damaged DNA binding;	ko03420(Nucleotide excision repair);ko01524(Platinum drug resistance)
CCM_07955	52.5546	15.2034	-1.78942	0.00490805	0.0491982	NW_006271974.1	GO:0055085;GO:0016021	-	KOG2533;opiNOG02197;opiNOG51676	G	sp|O74923|YJ7D_SCHPO Uncharacterized transporter C757.13 OS=Schizosaccharomyces pombe (strain 972 / ATCC 24843) GN=SPCC757.13 PE=3 SV=1	vitamin H transporter, putative	18169965	GO:0055085//transmembrane transport;	GO:0016021//integral component of membrane;	-	-
CCM_07237	177.692	82.2999	-1.11042	0.00496984	0.0496231	NW_006271973.1	-	-	sorNOG02958;opiNOG47307	QS	-	hypothetical protein	18169248	-	-	-	-
CCM_08496	8864.97	3936.26	-1.17129	0.00510649	0.0506849	NW_006271975.1	GO:0006457;GO:0000413;GO:0003755	K05864	sordNOG05497;opiNOG02177	O	sp|Q4HXF6|PPID_GIBZE Peptidyl-prolyl cis-trans isomerase D OS=Gibberella zeae (strain PH-1 / ATCC MYA-4620 / FGSC 9075 / NRRL 31084) GN=CPR6 PE=3 SV=1	peptidyl-prolyl cis-trans isomerase	18170503	GO:0006457//protein folding;GO:0000413//protein peptidyl-prolyl isomerization;	-	GO:0003755//peptidyl-prolyl cis-trans isomerase activity;	ko05131(Shigellosis);ko05022(Pathways of neurodegeneration - multiple diseases);ko05010(Alzheimer disease);ko04218(Cellular senescence);ko04217(Necroptosis)
CCM_02734	3616.59	1470.83	-1.298	0.00510909	0.0506849	NW_006271970.1	GO:0046685;GO:0043224;GO:0046686;GO:0043130;GO:0000209;GO:0031146;GO:0030174;GO:0042802;GO:0000083	K10259	opiNOG02953;sordNOG12155	KR	sp|Q01277|SCONB_NEUCR Probable E3 ubiquitin ligase complex SCF subunit scon-2 OS=Neurospora crassa (strain ATCC 24698 / 74-OR23-1A / CBS 708.71 / DSM 1257 / FGSC 987) GN=scon-2 PE=1 SV=1	sulfur controller-2	18164761	GO:0046685//response to arsenic-containing substance;GO:0046686//response to cadmium ion;GO:0000209//protein polyubiquitination;GO:0031146//SCF-dependent proteasomal ubiquitin-dependent protein catabolic process;GO:0030174//regulation of DNA-dependent DNA replication initiation;GO:0000083//regulation of transcription involved in G1/S transition of mitotic cell cycle;	GO:0043224//nuclear SCF ubiquitin ligase complex;	GO:0043130//ubiquitin binding;GO:0042802//identical protein binding;	ko04120(Ubiquitin mediated proteolysis);ko04111(Cell cycle - yeast)
CCM_05024	52.5555	19.1515	-1.45639	0.00513057	0.0508019	NW_006271971.1	-	-	opiNOG26883	R	sp|P53693|RDS1_SCHPO Protein rds1 OS=Schizosaccharomyces pombe (strain 972 / ATCC 24843) GN=rds1 PE=2 SV=2	Ferritin/ribonucleotide reductase-like protein	18167044	-	-	-	-
CCM_02904	898.671	334.858	-1.42424	0.00524238	0.0516872	NW_006271970.1	GO:0003824	-	opiNOG22420;sordNOG10566	SR	-	hypothetical protein	18164931	-	-	GO:0003824//catalytic activity;	-
CCM_03046	117.231	54.9858	-1.09222	0.00533025	0.0523388	NW_006271970.1	GO:0004806;GO:0016042	-	opiNOG01243	R	sp|D4AX63|LIPA_ARTBC Lipase A OS=Arthroderma benhamiae (strain ATCC MYA-4681 / CBS 112371) GN=ARB_00790 PE=3 SV=1	secretory lipase, putative	18165073	GO:0016042//lipid catabolic process;	-	GO:0004806//triglyceride lipase activity;	-
CCM_08345	8.00295	0	-Inf	0.00535058	0.0524313	NW_006271975.1	-	-	opiNOG01617;hypNOG04234;sordNOG11440;opiNOG17312;COG0666	SMR	sp|Q00808|HETE1_PODAS Vegetative incompatibility protein HET-E-1 OS=Podospora anserina GN=HET-E1 PE=4 SV=1	NACHT and ankyrin domain protein	18170353	-	-	-	-
CCM_06913	2652.18	956.452	-1.47142	0.005396	0.0528225	NW_006271973.1	GO:0048038;GO:0055114;GO:0008131;GO:0009308;GO:0005507	-	sordNOG11166	R	sp|Q9VCC0|CHRD1_DROME Cysteine and histidine-rich domain-containing protein OS=Drosophila melanogaster GN=CHORD PE=1 SV=1	CORD and CS domain protein	18168924	GO:0055114//obsolete oxidation-reduction process;GO:0009308//amine metabolic process;	-	GO:0048038//quinone binding;GO:0008131//primary amine oxidase activity;GO:0005507//copper ion binding;	-
CCM_06738	99.6767	45.5316	-1.13039	0.00555236	0.0540778	NW_006271973.1	GO:0016021	-	-	-	-	hypothetical protein	18168751	-	GO:0016021//integral component of membrane;	-	-
CCM_02872	108.025	49.8885	-1.11459	0.00559224	0.0541917	NW_006271970.1	-	-	hypNOG14371;sordNOG15162;sorNOG08332;opiNOG45701	R	-	hypothetical protein	18164899	-	-	-	-
CCM_07328	5916.28	2910.12	-1.02361	0.00576795	0.0551714	NW_006271974.1	-	K14018	sordNOG06883	I	sp|O94289|LUB1_SCHPO Ubiquitin homeostasis protein lub1 OS=Schizosaccharomyces pombe (strain 972 / ATCC 24843) GN=lub1 PE=1 SV=2	polyubiquitin binding protein (Doa1/Ufd3), putative	18169339	-	-	-	ko04141(Protein processing in endoplasmic reticulum)
CCM_00890	51.3584	18.6074	-1.46472	0.00592408	0.0559412	NW_006271969.1	-	-	-	-	-	hypothetical protein	18162924	-	-	-	-
CCM_06026	9.72122	0.32049	-4.92279	0.00602613	0.0566268	NW_006271972.1	-	-	-	-	-	hypothetical protein	18168044	-	-	-	-
CCM_02445	56.7416	9.90741	-2.51783	0.00603487	0.0566536	NW_006271970.1	-	-	opiNOG58722;hypNOG13264;sordNOG13296;opiNOG63510	S	-	hypothetical protein	18164472	-	-	-	-
CCM_06481	300.07	60.856	-2.30183	0.00616323	0.0574768	NW_006271973.1	-	-	-	-	-	hypothetical protein	18168495	-	-	-	-
CCM_04281	301.918	51.5255	-2.5508	0.00622839	0.0578103	NW_006271971.1	GO:0005215;GO:0055085;GO:0016021	-	sordNOG11015;opiNOG12809	R	sp|P46996|YJQ3_YEAST Uncharacterized membrane protein YJL163C OS=Saccharomyces cerevisiae (strain ATCC 204508 / S288c) GN=YJL163C PE=1 SV=1	tetracycline-efflux transporter, putative	18166304	GO:0055085//transmembrane transport;	GO:0016021//integral component of membrane;	GO:0005215//transporter activity;	-
CCM_01739	38.0863	4.56778	-3.05971	0.00634662	0.0585509	NW_006271969.1	GO:0016740;GO:0016021	K22721	COG3774;opiNOG03453;opiNOG55620	MS	sp|O14084|IMT1_SCHPO Inositol phosphoceramide mannosyltransferase 1 OS=Schizosaccharomyces pombe (strain 972 / ATCC 24843) GN=imt1 PE=3 SV=2	Glycosyltransferase	18163769	-	GO:0016021//integral component of membrane;	GO:0016740//transferase activity;	-
CCM_04050	31.4065	8.66455	-1.85787	0.00642811	0.0591324	NW_006271971.1	-	-	-	-	-	hypothetical protein	18166073	-	-	-	-
CCM_09402	28.3924	4.59176	-2.62839	0.00654108	0.0598852	NW_006271977.1	-	-	-	-	-	hypothetical protein	18171405	-	-	-	-
CCM_06912	184.417	70.8565	-1.38	0.00662899	0.0605171	NW_006271973.1	GO:0005507;GO:0009308;GO:0048038;GO:0008131;GO:0055114	K00276	sordNOG11922;opiNOG14092	Q	sp|Q12556|AMO1_ASPNG Copper amine oxidase 1 OS=Aspergillus niger GN=AO-I PE=1 SV=2	copper amine oxidase	18168923	GO:0009308//amine metabolic process;GO:0055114//obsolete oxidation-reduction process;	-	GO:0005507//copper ion binding;GO:0048038//quinone binding;GO:0008131//primary amine oxidase activity;	ko00960(Tropane, piperidine and pyridine alkaloid biosynthesis);ko00950(Isoquinoline alkaloid biosynthesis);ko00410(beta-Alanine metabolism);ko00360(Phenylalanine metabolism);ko00350(Tyrosine metabolism);ko00260(Glycine, serine and threonine metabolism)
CCM_06830	299.3	135.731	-1.14084	0.00670135	0.0609462	NW_006271973.1	-	-	sordNOG12406;opiNOG28887	S	-	HMG box protein	18168841	-	-	-	-
CCM_03516	1015.97	498.764	-1.02643	0.0067814	0.0615113	NW_006271970.1	GO:0016021	-	opiNOG35042	S	-	hypothetical protein	18165542	-	GO:0016021//integral component of membrane;	-	-
CCM_06485	46.3005	16.0695	-1.5267	0.00678269	0.0615113	NW_006271973.1	-	-	COG0791;opiNOG72862	MR	sp|P9WHU4|RIPB_MYCTO Peptidoglycan endopeptidase RipB OS=Mycobacterium tuberculosis (strain CDC 1551 / Oshkosh) GN=ripB PE=3 SV=1	NlpC/P60-like cell-wall peptidase, putative	18168499	-	-	-	-
CCM_05678	3354.48	530.191	-2.6615	0.00679358	0.061552	NW_006271972.1	-	-	-	-	-	hypothetical protein	18167696	-	-	-	-
CCM_00548	63.3379	8.53368	-2.89183	0.00699032	0.0627204	NW_006271969.1	-	-	sordNOG04052;opiNOG16822	S	-	hypothetical protein	18162583	-	-	-	-
CCM_03818	211.684	84.3109	-1.32812	0.00703624	0.0629789	NW_006271971.1	GO:0003677;GO:0008270;GO:0006355;GO:0005634	-	pleNOG07711;opiNOG18299;sordNOG09260	S	sp|O59746|YN2B_SCHPO Uncharacterized transcriptional regulatory protein C530.11c OS=Schizosaccharomyces pombe (strain 972 / ATCC 24843) GN=SPBC530.11c PE=1 SV=1	Fungal specific transcription factor	18165841	GO:0006355//regulation of transcription, DNA-templated;	GO:0005634//nucleus;	GO:0003677//DNA binding;GO:0008270//zinc ion binding;	-
CCM_01828	20.6352	3.84498	-2.42406	0.00704887	0.0630299	NW_006271969.1	-	-	opiNOG78963;hypNOG09285;sordNOG10141;opiNOG73269;NOG198024	S	sp|Q54RJ6|Y5363_DICDI Fido domain-containing protein DDB_G0283145 OS=Dictyostelium discoideum GN=DDB_G0283145 PE=4 SV=2	Filamentation induced protein by cAMP/death on curing	18163858	-	-	-	-
CCM_01492	23537.4	10135.6	-1.21552	0.00713464	0.0636227	NW_006271969.1	-	-	opiNOG39069;sorNOG05872;sordNOG13034	R	sp|D4B0F8|TLP1_ARTBC Antigenic thaumatin-like protein ARB_01932 OS=Arthroderma benhamiae (strain ATCC MYA-4681 / CBS 112371) GN=ARB_01932 PE=1 SV=2	BYS1 domain-containing protein	18163523	-	-	-	-
CCM_08874	38.3107	12.3145	-1.63739	0.00720285	0.0639935	NW_006271975.1	-	-	-	-	-	hypothetical protein	18170879	-	-	-	-
CCM_09625	68.9047	28.7544	-1.26082	0.00722579	0.0641381	NW_006271978.1	-	-	-	-	-	hypothetical protein	18171627	-	-	-	-
CCM_00307	1302.54	444.556	-1.55089	0.0073114	0.0647186	NW_006271969.1	-	K09702	opiNOG71068;opiNOG37498	RS	sp|Q5AW46|Y7484_EMENI Uncharacterized protein AN7484 OS=Emericella nidulans (strain FGSC A4 / ATCC 38163 / CBS 112.46 / NRRL 194 / M139) GN=AN7484 PE=1 SV=1	hypothetical protein	18162342	-	-	-	-
CCM_03255	895.973	338.681	-1.40353	0.00737884	0.0651357	NW_006271970.1	GO:0008152;GO:0031177;GO:0003824	-	opiNOG05776;COG1020;opiNOG24230;sordNOG06979	IQ	sp|E9FCP4|DTXS1_METRA Nonribosomal peptide synthetase dtxS1 OS=Metarhizium robertsii (strain ARSEF 23 / ATCC MYA-3075) GN=dtxS1 PE=1 SV=2	non-ribosomal peptide synthase, putative	18165281	GO:0008152//metabolic process;	-	GO:0031177//phosphopantetheine binding;GO:0003824//catalytic activity;	-
CCM_02117	1724.94	673.426	-1.35696	0.00748806	0.0657376	NW_006271970.1	GO:0051287;GO:0005829;GO:0000287;GO:0009098;GO:0055114;GO:0003862	K00052	sordNOG10386;COG0473	E	sp|Q6TWC4|LEU3_SORMA 3-isopropylmalate dehydrogenase OS=Sordaria macrospora GN=LEU1 PE=3 SV=1	3-isopropylmalate dehydrogenase	18164145	GO:0009098//leucine biosynthetic process;GO:0055114//obsolete oxidation-reduction process;	GO:0005829//cytosol;	GO:0051287//NAD binding;GO:0000287//magnesium ion binding;GO:0003862//3-isopropylmalate dehydrogenase activity;	ko00660(C5-Branched dibasic acid metabolism);ko00290(Valine, leucine and isoleucine biosynthesis)
CCM_00256	102.14	48.0056	-1.08927	0.00754238	0.0661541	NW_006271969.1	GO:0016042;GO:0004806	-	opiNOG01243	R	sp|Q9P8V9|LIP8_CANAL Lipase 8 OS=Candida albicans (strain SC5314 / ATCC MYA-2876) GN=LIP8 PE=3 SV=3	Lipase, secreted	18162291	GO:0016042//lipid catabolic process;	-	GO:0004806//triglyceride lipase activity;	-
CCM_02001	33.7382	10.2928	-1.71275	0.00755062	0.066166	NW_006271970.1	-	-	-	-	-	hypothetical protein	18164030	-	-	-	-
CCM_02119	145.838	57.3511	-1.34648	0.00784851	0.0683403	NW_006271970.1	GO:0016491;GO:0055114;GO:0046872	-	COG3491;opiNOG32355;pleNOG07256;opiNOG29236;sorNOG07482	QR	sp|D7PHZ1|VRTI_PENAE Oxidoreductase vrtI OS=Penicillium aethiopicum GN=vrtI PE=1 SV=1	gibberellin 3-beta hydroxylase, putative	18164147	GO:0055114//obsolete oxidation-reduction process;	-	GO:0016491//oxidoreductase activity;GO:0046872//metal ion binding;	-
CCM_08063	602.815	98.0212	-2.62055	0.00785889	0.0683688	NW_006271974.1	-	-	hypNOG09131;opiNOG68108	S	-	hypothetical protein	18170072	-	-	-	-
CCM_08013	123.722	34.2202	-1.85418	0.00807541	0.0697474	NW_006271974.1	GO:0016614;GO:0050660;GO:0055114	-	opiNOG10343	R	sp|A0A0E0RTV6|ZEB1_GIBZE FAD-linked oxidoreductase ZEB1 OS=Gibberella zeae (strain PH-1 / ATCC MYA-4620 / FGSC 9075 / NRRL 31084) GN=ZEB1 PE=2 SV=2	FAD-binding, type 2	18170022	GO:0055114//obsolete oxidation-reduction process;	-	GO:0016614//oxidoreductase activity, acting on CH-OH group of donors;GO:0050660//flavin adenine dinucleotide binding;	-
CCM_04370	64.6443	8.34135	-2.95417	0.00840579	0.0719545	NW_006271971.1	GO:0016021	-	NOG145529;opiNOG39403;sordNOG13600	SR	-	hypothetical protein	18166393	-	GO:0016021//integral component of membrane;	-	-
CCM_06345	1222.61	608.987	-1.00548	0.00851328	0.0726805	NW_006271972.1	GO:0016020;GO:0005634;GO:0005829;GO:0006751;GO:0003839	K07232	opiNOG22271;sorNOG02267;sordNOG05081;sordNOG09318	P	sp|P87305|CHAC_SCHPO Glutathione-specific gamma-glutamylcyclotransferase OS=Schizosaccharomyces pombe (strain 972 / ATCC 24843) GN=SPBC31F10.03 PE=3 SV=1	ChaC-like protein	18168359	GO:0006751//glutathione catabolic process;	GO:0016020//membrane;GO:0005634//nucleus;GO:0005829//cytosol;	GO:0003839//gamma-glutamylcyclotransferase activity;	ko00480(Glutathione metabolism)
CCM_07884	395.607	92.2206	-2.10091	0.00855777	0.0729954	NW_006271974.1	GO:0004252;GO:0006508	K01279	opiNOG09203;euNOG02693	O	sp|C5FHK0|SED1_ARTOC Tripeptidyl-peptidase SED1 OS=Arthroderma otae (strain ATCC MYA-4605 / CBS 113480) GN=SED1 PE=3 SV=1	aorsin endoprotease precursor	18169894	GO:0006508//proteolysis;	-	GO:0004252//serine-type endopeptidase activity;	ko04142(Lysosome)
CCM_02677	80.0408	20.6498	-1.95461	0.00877673	0.0741395	NW_006271970.1	GO:0008270;GO:0006357;GO:0005634;GO:0000981	-	NOG200718	R	-	Fungal transcriptional regulatory protein	18164704	GO:0006357//regulation of transcription by RNA polymerase II;	GO:0005634//nucleus;	GO:0008270//zinc ion binding;GO:0000981//DNA-binding transcription factor activity, RNA polymerase II-specific;	-
CCM_04839	24.094	5.25057	-2.19812	0.00894147	0.0752006	NW_006271971.1	GO:0065007	-	euNOG27048;sordNOG10574	TS	-	hypothetical protein	18166860	GO:0065007//biological regulation;	-	-	-
CCM_00397	26.6335	6.88941	-1.95079	0.00909561	0.0762968	NW_006271969.1	-	-	opiNOG64222	S	-	FG-GAP repeat protein	18162432	-	-	-	-
CCM_02530	170.932	72.309	-1.24117	0.00937064	0.0778565	NW_006271970.1	GO:0055085;GO:0022857;GO:0016021	-	sordNOG07611;opiNOG03112	P	sp|A0A1D8PN12|GIT2_CANAL Glycerophosphodiester transporter GIT2 OS=Candida albicans (strain SC5314 / ATCC MYA-2876) GN=GIT2 PE=2 SV=1	MFS phospholipid transporter Git1	18164557	GO:0055085//transmembrane transport;	GO:0016021//integral component of membrane;	GO:0022857//transmembrane transporter activity;	-
CCM_00572	75.2479	14.7111	-2.35474	0.00972942	0.0801447	NW_006271969.1	-	-	-	-	-	hypothetical protein	18162607	-	-	-	-
CCM_08220	45.6053	17.0995	-1.41525	0.00996863	0.0815603	NW_006271974.1	-	-	opiNOG31079;sordNOG13429	S	sp|Q8G9F9|INHA_PSEPU Isonitrile hydratase OS=Pseudomonas putida GN=inhA PE=1 SV=1	ThiJ/PfpI family protein	18170228	-	-	-	-
CCM_04772	107.477	52.3934	-1.03657	0.0100271	0.0818256	NW_006271971.1	GO:0016491;GO:0055114	-	opiNOG33143;opiNOG25467;sordNOG13648	R	sp|Q9USJ6|FMNR_SCHPO NAD(P)H-dependent FMN reductase C4B3.06c OS=Schizosaccharomyces pombe (strain 972 / ATCC 24843) GN=SPCC4B3.06c PE=3 SV=1	NADPH-dependent FMN reductase	18166793	GO:0055114//obsolete oxidation-reduction process;	-	GO:0016491//oxidoreductase activity;	-
CCM_00632	2048.41	683.719	-1.58303	0.0101354	0.0822906	NW_006271969.1	GO:0016021	K17278	opiNOG29938;sordNOG12306;sorNOG06768	R	sp|Q12091|DAP1_YEAST Damage response protein 1 OS=Saccharomyces cerevisiae (strain ATCC 204508 / S288c) GN=DAP1 PE=1 SV=1	membrane-associated progesterone receptor component 1	18162667	-	GO:0016021//integral component of membrane;	-	-
CCM_07002	84.2087	39.695	-1.08501	0.0101901	0.0826646	NW_006271973.1	-	-	pleNOG06498;opiNOG32952;opiNOG21032	S	-	hypothetical protein	18169013	-	-	-	-
CCM_07497	47.3782	18.1419	-1.3849	0.0102318	0.0829331	NW_006271974.1	-	-	-	-	-	hypothetical protein	18169508	-	-	-	-
CCM_07247	72.087	32.7301	-1.13912	0.0108593	0.0864161	NW_006271973.1	GO:0006810;GO:0016021	K15111	sordNOG04853	C	sp|Q5U680|SAMC_MOUSE S-adenosylmethionine mitochondrial carrier protein OS=Mus musculus GN=Slc25a26 PE=1 SV=2	mitochondrial carrier protein, putative	18169258	GO:0006810//transport;	GO:0016021//integral component of membrane;	-	-
CCM_03889	93.3772	43.1175	-1.11479	0.0109896	0.087092	NW_006271971.1	GO:0006355;GO:0043565;GO:0003700	-	opiNOG42372;sordNOG14461	S	-	hypothetical protein	18165912	GO:0006355//regulation of transcription, DNA-templated;	-	GO:0043565//sequence-specific DNA binding;GO:0003700//DNA-binding transcription factor activity;	-
CCM_06547	62.418	17.1707	-1.86201	0.0112014	0.0883098	NW_006271973.1	-	-	sordNOG05103;opiNOG13361;sorNOG08561;pleNOG00881	QR	sp|P39577|DLTE_BACSU Uncharacterized oxidoreductase DltE OS=Bacillus subtilis (strain 168) GN=dltE PE=3 SV=2	short-chain dehydrogenases/reductase, putative	18168561	-	-	-	-
CCM_07556	455.389	223.338	-1.02787	0.0113021	0.088814	NW_006271974.1	GO:0003993;GO:0016311;GO:0005739	K01078	opiNOG02878;sordNOG11462;NOG15111	IR	sp|Q9USS6|PPA4_SCHPO Probable acid phosphatase SPBC4.06 OS=Schizosaccharomyces pombe (strain 972 / ATCC 24843) GN=SPBC4.06 PE=3 SV=1	acid phosphatase, putative	18169567	GO:0016311//dephosphorylation;	GO:0005739//mitochondrion;	GO:0003993//acid phosphatase activity;	ko00740(Riboflavin metabolism);ko00730(Thiamine metabolism)
CCM_06550	298.413	136.761	-1.12565	0.0115658	0.0902055	NW_006271973.1	GO:0016021	-	opiNOG56711	S	-	hypothetical protein	18168564	-	GO:0016021//integral component of membrane;	-	-
CCM_04717	20.0407	4.33363	-2.20928	0.0115701	0.0902055	NW_006271971.1	GO:0016021	-	-	-	-	hypothetical protein	18166738	-	GO:0016021//integral component of membrane;	-	-
CCM_04139	55.0481	22.5406	-1.28817	0.011619	0.0905132	NW_006271971.1	-	-	-	-	-	hypothetical protein	18166162	-	-	-	-
CCM_04905	1208.02	380.421	-1.66698	0.0117538	0.0913414	NW_006271971.1	GO:0016020;GO:0005618;GO:0004252;GO:0006508	-	COG1404;sordNOG04991	O	sp|P00781|SUBD_BACLI Subtilisin DY OS=Bacillus licheniformis GN=apr PE=1 SV=1	subtilisin, putative	18166926	GO:0006508//proteolysis;	GO:0016020//membrane;GO:0005618//cell wall;	GO:0004252//serine-type endopeptidase activity;	-
CCM_06503	137.844	48.5855	-1.50444	0.0121795	0.0940982	NW_006271973.1	GO:0005779;GO:0016559	-	eurotNOG07235;opiNOG44637;NOG123292	S	-	PEX11 domain protein	18168517	GO:0016559//peroxisome fission;	GO:0005779//integral component of peroxisomal membrane;	-	-
CCM_04780	68.6447	30.6001	-1.16561	0.012942	0.0979618	NW_006271971.1	-	-	-	-	-	hypothetical protein	18166801	-	-	-	-
CCM_00372	41.9588	15.6503	-1.42279	0.012942	0.0979618	NW_006271969.1	GO:0016884;GO:0016740	-	opiNOG06348;pleNOG03061	J	sp|B7PDC5|GATA_IXOSC Glutamyl-tRNA(Gln) amidotransferase subunit A, mitochondrial OS=Ixodes scapularis GN=gatA PE=3 SV=1	glutamyl-tRNA(Gln) amidotransferase	18162407	-	-	GO:0016884//carbon-nitrogen ligase activity, with glutamine as amido-N-donor;GO:0016740//transferase activity;	-
CCM_04834	33.1716	8.90231	-1.89769	0.0131127	0.0989424	NW_006271971.1	-	-	-	-	-	hypothetical protein	18166855	-	-	-	-
CCM_01868	6.68648	0	-Inf	0.0132572	0.0997196	NW_006271969.1	GO:0008237;GO:0006508	-	opiNOG10620;opiNOG03245	RO	sp|E4V4I7|MEP6_ARTGP Extracellular metalloprotease MGYG_07913 OS=Arthroderma gypseum (strain ATCC MYA-4604 / CBS 118893) GN=MGYG_07913 PE=3 SV=1	hypothetical protein	18163897	GO:0006508//proteolysis;	-	GO:0008237//metallopeptidase activity;	-
CCM_06821	10810.2	626.559	-4.1088	0.0133029	0.0999851	NW_006271973.1	-	-	euNOG57990;sordNOG12193	O	sp|P19752|HSP30_NEUCR 30 kDa heat shock protein OS=Neurospora crassa (strain ATCC 24698 / 74-OR23-1A / CBS 708.71 / DSM 1257 / FGSC 987) GN=hsp30 PE=3 SV=1	30 kDa heat shock protein	18168832	-	-	-	-
CCM_07117	65.6009	28.8977	-1.18276	0.0133353	0.100072	NW_006271973.1	-	-	sorNOG01209;opiNOG05078	SR	-	hypothetical protein	18169128	-	-	-	-
CCM_06508	40.6414	14.743	-1.46292	0.0134012	0.100488	NW_006271973.1	-	-	opiNOG08204;opiNOG42592;opiNOG59069	R	-	muramidase, putative	18168522	-	-	-	-
CCM_08365	462.238	189.807	-1.2841	0.0134293	0.10062	NW_006271975.1	-	-	opiNOG45781	R	-	hypothetical protein	18170373	-	-	-	-
CCM_07492	475.825	225.122	-1.07973	0.0137244	0.102274	NW_006271974.1	GO:0055085;GO:0016021	-	sordNOG07273;sorNOG04360	R	sp|Q9C101|YKT8_SCHPO Uncharacterized MFS-type transporter PB1E7.08c OS=Schizosaccharomyces pombe (strain 972 / ATCC 24843) GN=SPAPB1E7.08c PE=1 SV=1	membrane transporter	18169503	GO:0055085//transmembrane transport;	GO:0016021//integral component of membrane;	-	-
CCM_00773	45.476	11.9922	-1.92301	0.0138685	0.103187	NW_006271969.1	-	-	KOG1290;opiNOG37182	T	-	hypothetical protein	18162807	-	-	-	-
CCM_06272	7.01589	0	-Inf	0.0139133	0.10344	NW_006271972.1	GO:0050525;GO:0008152;GO:0005576	K08095	sordNOG13469;opiNOG51281	R	sp|Q9Y7G8|CUTI_PYRBR Cutinase OS=Pyrenopeziza brassicae PE=3 SV=1	cutinase precursor, putative	18168287	GO:0008152//metabolic process;	GO:0005576//extracellular region;	GO:0050525//cutinase activity;	-
CCM_05734	2723.17	189.182	-3.84744	0.0141667	0.104757	NW_006271972.1	GO:0008152;GO:0016787	-	opiNOG07824;COG2513	GC	sp|Q0QLE4|DML_EUBBA 2,3-dimethylmalate lyase OS=Eubacterium barkeri GN=Dml PE=1 SV=1	carboxyphosphonoenolpyruvate phosphonomutase, putative	18167752	GO:0008152//metabolic process;	-	GO:0016787//hydrolase activity;	-
CCM_07756	798.662	301.412	-1.40585	0.0144205	0.106186	NW_006271974.1	-	-	sordNOG07654	H	sp|P24203|YJIA_ECOLI Uncharacterized GTP-binding protein YjiA OS=Escherichia coli (strain K12) GN=yjiA PE=1 SV=3	CobW domain containing protein	18169766	-	-	-	-
CCM_06482	171.181	41.018	-2.06119	0.0144261	0.106186	NW_006271973.1	-	-	sordNOG08115	R	sp|Q9FCD7|TAP_STRCO Tripeptidyl aminopeptidase OS=Streptomyces coelicolor (strain ATCC BAA-471 / A3(2) / M145) GN=tap PE=3 SV=1	proteinase, putative	18168496	-	-	-	-
CCM_05325	85.4946	32.4559	-1.39735	0.0145677	0.106572	NW_006271972.1	GO:0016021	-	-	-	-	hypothetical protein	18167343	-	GO:0016021//integral component of membrane;	-	-
CCM_00465	276.511	135.621	-1.02776	0.0146013	0.106659	NW_006271969.1	GO:0016021	-	opiNOG35337	S	-	hypothetical protein	18162500	-	GO:0016021//integral component of membrane;	-	-
CCM_02589	791.249	387.704	-1.02917	0.0150929	0.109713	NW_006271970.1	GO:0055114;GO:0016491	-	pleNOG03450;opiNOG51046	Q	sp|A7HU16|BVMO_PARL1 Baeyer-Villiger monooxygenase OS=Parvibaculum lavamentivorans (strain DS-1 / DSM 13023 / NCIMB 13966) GN=Plav_1781 PE=1 SV=1	FAD dependent oxidoreductase	18164616	GO:0055114//obsolete oxidation-reduction process;	-	GO:0016491//oxidoreductase activity;	-
CCM_05286	52.3915	22.0696	-1.24727	0.0150993	0.109713	NW_006271972.1	-	-	opiNOG25720;opiNOG37063	R	-	ferulic acid esterase (FaeA), putative	18167305	-	-	-	-
CCM_06844	70.2293	32.5199	-1.11075	0.0151973	0.110174	NW_006271973.1	-	-	opiNOG18045;opiNOG08562;opiNOG51790	Q	sp|O74959|YJCD_SCHPO Uncharacterized oxidoreductase C736.13 OS=Schizosaccharomyces pombe (strain 972 / ATCC 24843) GN=SPCC736.13 PE=3 SV=1	short-chain dehydrogenase	18168855	-	-	-	-
CCM_08842	6825.62	3050.72	-1.16181	0.0154169	0.11103	NW_006271975.1	GO:0005975;GO:0004568;GO:0006032	-	opiNOG14280;sordNOG09717	GR	sp|Q9WTV1|CH3L1_RAT Chitinase-3-like protein 1 OS=Rattus norvegicus GN=Chi3l1 PE=2 SV=3	bacteriodes thetaiotaomicron symbiotic chitinase, putative	18170847	GO:0005975//carbohydrate metabolic process;GO:0006032//chitin catabolic process;	-	GO:0004568//chitinase activity;	-
CCM_00758	14291	4395.44	-1.70103	0.0157384	0.112485	NW_006271969.1	-	-	sorNOG01340;opiNOG08143;sordNOG06823	R	sp|Q03104|MSC1_YEAST Meiotic sister chromatid recombination protein 1 OS=Saccharomyces cerevisiae (strain ATCC 204508 / S288c) GN=MSC1 PE=1 SV=1	stress response protein (Ish1), putative	18162792	-	-	-	-
CCM_03799	24.0118	6.83157	-1.81346	0.0159773	0.113518	NW_006271971.1	-	-	-	-	-	hypothetical protein	18165822	-	-	-	-
CCM_01631	51.9194	22.075	-1.23386	0.0160719	0.113937	NW_006271969.1	-	-	sordNOG10855	S	-	hypothetical protein	18163661	-	-	-	-
CCM_06772	633.032	266.303	-1.24921	0.0160982	0.113954	NW_006271973.1	-	-	hypNOG09902;sordNOG06478;opiNOG17533	S	-	hypothetical protein	18168785	-	-	-	-
CCM_08391	386.17	167.957	-1.20114	0.0161068	0.113954	NW_006271975.1	GO:0006351;GO:0043934;GO:0048856;GO:0030154	-	opiNOG42358;sordNOG15139	S	sp|J5JPY5|WETA_BEAB2 Developmental regulatory protein wetA OS=Beauveria bassiana (strain ARSEF 2860) GN=wetA PE=2 SV=1	hypothetical protein	18170399	GO:0006351//transcription, DNA-templated;GO:0043934//sporulation;GO:0048856//anatomical structure development;GO:0030154//cell differentiation;	-	-	-
CCM_06178	18.3539	3.84407	-2.25538	0.0161972	0.11432	NW_006271972.1	-	-	-	-	-	hypothetical protein	18168193	-	-	-	-
CCM_06236	63.1822	25.4899	-1.30959	0.0162204	0.114369	NW_006271972.1	-	K09561	-	-	-	hypothetical protein	18168251	-	-	-	ko04141(Protein processing in endoplasmic reticulum);ko04120(Ubiquitin mediated proteolysis)
CCM_00468	5139.32	1183.32	-2.11874	0.0164155	0.115127	NW_006271969.1	-	-	sordNOG14958;hypNOG14250;opiNOG46620	S	-	hypothetical protein	18162503	-	-	-	-
CCM_01367	77.3532	37.7574	-1.0347	0.0165205	0.115415	NW_006271969.1	-	-	-	-	-	hypothetical protein	18163398	-	-	-	-
CCM_02017	133.499	55.868	-1.25673	0.0165644	0.115554	NW_006271970.1	-	-	COG2320;opiNOG56186	S	sp|Q9KBN7|Y1888_BACHD UPF0157 protein BH1888 OS=Bacillus halodurans (strain ATCC BAA-125 / DSM 18197 / FERM 7344 / JCM 9153 / C-125) GN=BH1888 PE=3 SV=1	GrpB domain protein	18164046	-	-	-	-
CCM_06992	66.2215	31.2176	-1.08494	0.016587	0.115628	NW_006271973.1	-	-	-	-	-	hypothetical protein	18169003	-	-	-	-
CCM_06210	41.8154	16.1567	-1.3719	0.0167428	0.116136	NW_006271972.1	GO:0016021;GO:0055085	-	opiNOG03553;sordNOG10482	R	sp|A0A0B5EMG9|FUB11_FUSOX Efflux pump FUBT OS=Fusarium oxysporum GN=FUBT PE=1 SV=1	MFS multidrug transporter, putative	18168225	GO:0055085//transmembrane transport;	GO:0016021//integral component of membrane;	-	-
CCM_00655	31.6451	10.4975	-1.59193	0.0168789	0.116648	NW_006271969.1	-	-	-	-	-	hypothetical protein	18162689	-	-	-	-
CCM_04181	1870.41	841.964	-1.15153	0.0169066	0.116755	NW_006271971.1	GO:0051539;GO:0003861;GO:0009098;GO:0009316	K01702	sordNOG08023;opiNOG02615	E	sp|P55251|LEUC_RHIPU 3-isopropylmalate dehydratase OS=Rhizomucor pusillus GN=LEUA PE=3 SV=1	3-isopropylmalate dehydratase	18166204	GO:0009098//leucine biosynthetic process;	GO:0009316//3-isopropylmalate dehydratase complex;	GO:0051539//4 iron, 4 sulfur cluster binding;GO:0003861//3-isopropylmalate dehydratase activity;	ko00290(Valine, leucine and isoleucine biosynthesis)
CCM_09579	561.207	228.001	-1.29949	0.017259	0.118086	NW_006271977.1	-	-	opiNOG16539;sordNOG04628	RS	sp|D4B3R7|A3106_ARTBC Extracellular protein ARB_03106 OS=Arthroderma benhamiae (strain ATCC MYA-4681 / CBS 112371) GN=ARB_03106 PE=1 SV=1	hypothetical protein	18171581	-	-	-	-
CCM_08407	76.2167	37.9068	-1.00765	0.0174652	0.118652	NW_006271975.1	-	-	-	-	-	hypothetical protein	18170415	-	-	-	-
CCM_07564	286.764	118.212	-1.27849	0.0175922	0.119178	NW_006271974.1	-	-	sordNOG14782;opiNOG45731;fuNOG21579	R	-	hypothetical protein	18169575	-	-	-	-
CCM_03766	11.3507	1.32287	-3.10104	0.0176814	0.119639	NW_006271971.1	-	-	-	-	-	hypothetical protein	18165789	-	-	-	-
CCM_06594	653.198	198.238	-1.72029	0.0179138	0.120407	NW_006271973.1	GO:0016021;GO:0055085	-	sordNOG04834	S	sp|Q59XM0|QDR3_CANAL MFS antiporter QDR3 OS=Candida albicans (strain SC5314 / ATCC MYA-2876) GN=QDR3 PE=2 SV=2	Major facilitator superfamily transporter	18168608	GO:0055085//transmembrane transport;	GO:0016021//integral component of membrane;	-	-
CCM_05700	874.785	126.103	-2.79432	0.0179706	0.120636	NW_006271972.1	GO:0055085;GO:0016021	-	sordNOG11595	R	sp|B8NM75|USTT_ASPFN Efflux pump ustT OS=Aspergillus flavus (strain ATCC 200026 / FGSC A1120 / NRRL 3357 / JCM 12722 / SRRC 167) GN=ustT PE=3 SV=1	MFS transporter	18167718	GO:0055085//transmembrane transport;	GO:0016021//integral component of membrane;	-	-
CCM_00076	122.693	59.2101	-1.05114	0.0179901	0.120661	NW_006271969.1	GO:0016021	-	opiNOG47684	S	-	hypothetical protein	18162111	-	GO:0016021//integral component of membrane;	-	-
CCM_03672	24.2525	6.80488	-1.83349	0.01823	0.121783	NW_006271971.1	GO:0006468;GO:0004672;GO:0005524	K08832	opiNOG31647	T	sp|Q45FA5|SRPK_PHYPO Serine/threonine-protein kinase SRPK OS=Physarum polycephalum PE=1 SV=1	protein kinase domain-containing protein	18165696	GO:0006468//protein phosphorylation;	-	GO:0004672//protein kinase activity;GO:0005524//ATP binding;	-
CCM_08734	147.83	68.6759	-1.10606	0.0184765	0.122628	NW_006271975.1	-	-	necNOG13645;sordNOG15237	S	-	Extracellular membrane protein, 8-cysteine region, CFEM	18170739	-	-	-	-
CCM_01529	1524.46	288.96	-2.39936	0.0184841	0.122628	NW_006271969.1	GO:0016021	-	sordNOG05215	R	sp|Q9USG8|MU190_SCHPO Meiotically up-regulated gene 190 protein OS=Schizosaccharomyces pombe (strain 972 / ATCC 24843) GN=mug190 PE=1 SV=1	C2 domain protein	18163560	-	GO:0016021//integral component of membrane;	-	-
CCM_06965	3400.57	1545.02	-1.13814	0.0187602	0.124032	NW_006271973.1	-	K15627	sordNOG08165	S	sp|Q8VBT9|ASPC1_MOUSE Tether containing UBX domain for GLUT4 OS=Mus musculus GN=Aspscr1 PE=1 SV=1	UBX domain protein, putative	18168976	-	-	-	ko05202(Transcriptional misregulation in cancer)
CCM_04749	35.878	13.5368	-1.40622	0.0189625	0.125111	NW_006271971.1	GO:0055085;GO:0016021	-	opiNOG02197;opiNOG53456;KOG2533	G	sp|O74923|YJ7D_SCHPO Uncharacterized transporter C757.13 OS=Schizosaccharomyces pombe (strain 972 / ATCC 24843) GN=SPCC757.13 PE=3 SV=1	allantoate permease, putative	18166770	GO:0055085//transmembrane transport;	GO:0016021//integral component of membrane;	-	-
CCM_08732	264.277	117.994	-1.16333	0.0190085	0.125156	NW_006271975.1	GO:0004553;GO:0005975;GO:0030246	-	sorNOG03956;opiNOG55844;sordNOG12467	R	sp|B0XTU6|EGLX_ASPFC Probable endo-1,3(4)-beta-glucanase AFUB_029980 OS=Neosartorya fumigata (strain CEA10 / CBS 144.89 / FGSC A1163) GN=AFUB_029980 PE=3 SV=1	endo-1,3(4)-beta-glucanase, putative	18170737	GO:0005975//carbohydrate metabolic process;	-	GO:0004553//hydrolase activity, hydrolyzing O-glycosyl compounds;GO:0030246//carbohydrate binding;	-
CCM_06372	2991.92	1147.2	-1.38296	0.0191379	0.12575	NW_006271972.1	-	-	opiNOG44926;NOG113577	S	-	hypothetical protein	18168386	-	-	-	-
CCM_01499	188.601	48.9677	-1.94543	0.019196	0.126026	NW_006271969.1	GO:0004932;GO:0007186;GO:0016021	K04627	sordNOG15587;sordNOG07116;hypNOG01239	ST	sp|P06783|STE3_YEAST Pheromone a factor receptor OS=Saccharomyces cerevisiae (strain ATCC 204508 / S288c) GN=STE3 PE=1 SV=1	a-pheromone receptor PreA	18163530	GO:0007186//G protein-coupled receptor signaling pathway;	GO:0016021//integral component of membrane;	GO:0004932//mating-type factor pheromone receptor activity;	ko04011(MAPK signaling pathway - yeast)
CCM_03849	62.7076	28.7363	-1.12576	0.0192429	0.126094	NW_006271971.1	GO:0016021	-	sordNOG04481	S	-	hypothetical protein	18165872	-	GO:0016021//integral component of membrane;	-	-
CCM_02574	20.6862	5.25057	-1.97812	0.0194404	0.126699	NW_006271970.1	-	-	opiNOG46699;sordNOG15108	S	-	hypothetical protein	18164601	-	-	-	-
CCM_05979	55.2533	24.5508	-1.17029	0.0197144	0.127791	NW_006271972.1	GO:0008080	-	opiNOG19952;sordNOG09599	R	-	Acyl-CoA N-acyltransferase	18167997	-	-	GO:0008080//N-acetyltransferase activity;	-
CCM_03444	173.354	54.9481	-1.65758	0.0200744	0.128772	NW_006271970.1	GO:0055085;GO:0016021	-	opiNOG00807	R	sp|A0A0B5EMG9|FUB11_FUSOX Efflux pump FUBT OS=Fusarium oxysporum GN=FUBT PE=1 SV=1	MFS multidrug transporter	18165470	GO:0055085//transmembrane transport;	GO:0016021//integral component of membrane;	-	-
CCM_04633	1356.26	428.072	-1.6637	0.0200934	0.128772	NW_006271971.1	GO:0055085;GO:0016021	-	sordNOG05827;opiNOG08480	R	sp|Q0CJ61|ATB_ASPTN Efflux pump atB OS=Aspergillus terreus (strain NIH 2624 / FGSC A1156) GN=atB PE=3 SV=1	Major facilitator superfamily transporter	18166655	GO:0055085//transmembrane transport;	GO:0016021//integral component of membrane;	-	-
CCM_00714	14.0803	2.238	-2.65339	0.0201166	0.128788	NW_006271969.1	-	-	opiNOG59818;sordNOG13766;opiNOG56370;magNOG04093	R	sp|P19463|CON13_NEUCR Conidiation-specific protein 13 OS=Neurospora crassa (strain ATCC 24698 / 74-OR23-1A / CBS 708.71 / DSM 1257 / FGSC 987) GN=con-13 PE=2 SV=1	conidiation-specific protein, putative	18162748	-	-	-	-
CCM_08985	15.3179	2.96714	-2.36808	0.0206636	0.131549	NW_006271975.1	GO:0015035;GO:0055114	-	opiNOG39526;sordNOG09278;opiNOG22229	RS	sp|P39598|YWBO_BACSU Uncharacterized protein YwbO OS=Bacillus subtilis (strain 168) GN=ywbO PE=4 SV=1	thioredoxin, putative	18170989	GO:0055114//obsolete oxidation-reduction process;	-	GO:0015035//protein-disulfide reductase activity;	-
CCM_04652	10.9774	1.3665	-3.00598	0.0206981	0.131631	NW_006271971.1	GO:0005829;GO:0005634;GO:0008080	-	sordNOG12501	E	sp|P79081|ATS1_SCHPO N-acetyltransferase ats1 OS=Schizosaccharomyces pombe (strain 972 / ATCC 24843) GN=ats1 PE=2 SV=1	acetyltransferase, GNAT family, putative	18166674	-	GO:0005829//cytosol;GO:0005634//nucleus;	GO:0008080//N-acetyltransferase activity;	-
CCM_07953	10.0252	0.96147	-3.38224	0.0207295	0.131631	NW_006271974.1	-	-	hypNOG14146	R	-	hypothetical protein	18169963	-	-	-	-
CCM_09254	229.643	108.079	-1.0873	0.0211562	0.133766	NW_006271976.1	-	-	-	-	-	hypothetical protein	18171257	-	-	-	-
CCM_07134	298.871	148.47	-1.00935	0.0211788	0.133766	NW_006271973.1	GO:0046872	-	hypNOG13947	R	-	hypothetical protein	18169145	-	-	GO:0046872//metal ion binding;	-
CCM_04074	847.063	407.905	-1.05424	0.0212792	0.134224	NW_006271971.1	GO:0016491;GO:0055114	K22745	sordNOG07185	C	sp|B4F6I3|AIFM2_XENTR Apoptosis-inducing factor 2 OS=Xenopus tropicalis GN=aifm2 PE=2 SV=1	apoptosis-inducing factor, putative	18166097	GO:0055114//obsolete oxidation-reduction process;	-	GO:0016491//oxidoreductase activity;	ko04115(p53 signaling pathway)
CCM_05068	11.0607	1.45284	-2.92849	0.021348	0.134305	NW_006271972.1	-	-	sorNOG08077;opiNOG41235	LS	-	hypothetical protein	18167088	-	-	-	-
CCM_08070	56.9285	26.0818	-1.12611	0.0214362	0.134508	NW_006271974.1	-	K01192	sordNOG14130;opiNOG60661	S	-	hypothetical protein	18170079	-	-	-	ko04142(Lysosome);ko00511(Other glycan degradation)
CCM_05658	40.9947	16.439	-1.31831	0.0229006	0.141128	NW_006271972.1	-	-	sorNOG06879;sordNOG07029	SR	-	hypothetical protein	18167676	-	-	-	-
CCM_07149	341.609	118.267	-1.5303	0.0230106	0.141523	NW_006271973.1	GO:0006284;GO:0003824	K10773	sordNOG10957;opiNOG24494	L	sp|F4JCQ3|DG783_ARATH Putative DNA glycosylase At3g47830 OS=Arabidopsis thaliana GN=At3g47830 PE=3 SV=1	HhH-GPD family base excision DNA repair protein	18169160	GO:0006284//base-excision repair;	-	GO:0003824//catalytic activity;	ko03410(Base excision repair)
CCM_08443	8.70176	0.682795	-3.67178	0.0231442	0.142163	NW_006271975.1	-	-	-	-	-	hypothetical protein	18170450	-	-	-	-
CCM_03089	15.0061	3.05529	-2.29617	0.0231631	0.142188	NW_006271970.1	-	-	-	-	-	hypothetical protein	18165116	-	-	-	-
CCM_08091	44.3337	18.2293	-1.28215	0.0233678	0.142897	NW_006271974.1	GO:0016787	-	opiNOG31766;COG2272	IR	sp|D4B1N9|LIP3_ARTBC Probable secreted lipase ARB_02369 OS=Arthroderma benhamiae (strain ATCC MYA-4681 / CBS 112371) GN=ARB_02369 PE=1 SV=1	carboxylesterase	18170100	-	-	GO:0016787//hydrolase activity;	-
CCM_05164	341.763	148.621	-1.20136	0.0234424	0.143027	NW_006271972.1	GO:0008660;GO:0030170;GO:0009310	K01505	sordNOG10385	S	sp|Q5KMX3|1A1D_CRYNJ Probable 1-aminocyclopropane-1-carboxylate deaminase OS=Cryptococcus neoformans var. neoformans serotype D (strain JEC21 / ATCC MYA-565) GN=CNB00190 PE=3 SV=1	1-aminocyclopropane-1-carboxylate deaminase, putative	18167183	GO:0009310//amine catabolic process;	-	GO:0008660//1-aminocyclopropane-1-carboxylate deaminase activity;GO:0030170//pyridoxal phosphate binding;	ko00270(Cysteine and methionine metabolism)
CCM_08807	24.6619	7.70851	-1.67776	0.0235003	0.143161	NW_006271975.1	-	-	-	-	-	hypothetical protein	18170812	-	-	-	-
CCM_00334	23.7354	5.65198	-2.07021	0.0241367	0.14602	NW_006271969.1	GO:0004497;GO:0055114;GO:0016705;GO:0005506;GO:0020037	-	opiNOG55648;opiNOG06777	Q	sp|Q9C449|PAXP_PENPX Cytochrome P450 monooxygenase paxP OS=Penicillium paxilli GN=paxP PE=1 SV=1	cytochrome P450 monooxygenase, putative	18162369	GO:0055114//obsolete oxidation-reduction process;	-	GO:0004497//monooxygenase activity;GO:0016705//oxidoreductase activity, acting on paired donors, with incorporation or reduction of molecular oxygen;GO:0005506//iron ion binding;GO:0020037//heme binding;	-
CCM_04258	94.8125	41.5987	-1.18854	0.024243	0.146571	NW_006271971.1	-	-	onyNOG07917;opiNOG44359	S	-	hypothetical protein	18166281	-	-	-	-
CCM_08948	29.0716	8.53549	-1.76806	0.0245839	0.148446	NW_006271975.1	GO:0006139	-	-	-	-	hypothetical protein	18170952	GO:0006139//nucleobase-containing compound metabolic process;	-	-	-
CCM_07006	37.6809	15.1847	-1.31122	0.0247971	0.149147	NW_006271973.1	-	-	-	-	-	hypothetical protein	18169017	-	-	-	-
CCM_00571	35.3244	13.5555	-1.38178	0.0251725	0.150581	NW_006271969.1	-	-	-	-	-	hypothetical protein	18162606	-	-	-	-
CCM_04494	193.887	94.4644	-1.03737	0.0253435	0.150946	NW_006271971.1	GO:0005840	-	sordNOG09942	S	sp|Q5M8G6|IMPTA_XENTR Protein IMPACT-A OS=Xenopus tropicalis GN=impact-A PE=2 SV=1	impact, putative	18166517	-	GO:0005840//ribosome;	-	-
CCM_08025	3954.64	339.155	-3.54353	0.0257259	0.152187	NW_006271974.1	GO:0005975;GO:0004459;GO:0019752;GO:0055114	K00016	opiNOG12255;sorNOG06623;pleNOG01211	C	sp|Q9P4B6|LDHA_RHIOR L-lactate dehydrogenase A OS=Rhizopus oryzae GN=LDHA PE=3 SV=1	L-lactate dehydrogenase A	18170034	GO:0005975//carbohydrate metabolic process;GO:0019752//carboxylic acid metabolic process;GO:0055114//obsolete oxidation-reduction process;	-	GO:0004459//L-lactate dehydrogenase activity;	ko05230(Central carbon metabolism in cancer);ko04922(Glucagon signaling pathway);ko04066(HIF-1 signaling pathway);ko00640(Propanoate metabolism);ko00620(Pyruvate metabolism);ko00270(Cysteine and methionine metabolism);ko00010(Glycolysis / Gluconeogenesis)
CCM_03220	212.809	106.033	-1.00504	0.0262391	0.154079	NW_006271970.1	GO:0003677;GO:0005524;GO:0006281;GO:0006310;GO:0003910;GO:0006266	K10777	sordNOG08596	S	sp|A8N936|DNLI4_COPC7 DNA ligase 4 OS=Coprinopsis cinerea (strain Okayama-7 / 130 / ATCC MYA-4618 / FGSC 9003) GN=LIG4 PE=3 SV=2	ATP dependent DNA ligase domain protein	18165246	GO:0006281//DNA repair;GO:0006310//DNA recombination;GO:0006266//DNA ligation;	-	GO:0003677//DNA binding;GO:0005524//ATP binding;GO:0003910//DNA ligase (ATP) activity;	ko03450(Non-homologous end-joining)
CCM_04237	134.099	48.7889	-1.45867	0.0263407	0.154189	NW_006271971.1	GO:0016788	-	magNOG09090;opiNOG06416	RI	sp|A7J2C6|AES1_HYPJE Acetylesterase OS=Hypocrea jecorina GN=aes1 PE=1 SV=1	GDSL lipase/acylhydrolase family protein	18166260	-	-	GO:0016788//hydrolase activity, acting on ester bonds;	-
CCM_03523	30.268	11.257	-1.42698	0.0265102	0.154731	NW_006271970.1	-	-	sordNOG11696;opiNOG10639	R	-	oxidoreductase CipA, putative	18165549	-	-	-	-
CCM_09300	61.0788	29.5039	-1.04976	0.0265428	0.154827	NW_006271976.1	GO:0006508;GO:0004252	-	opiNOG21313;opiNOG06850	E	sp|P35049|TRYP_FUSOX Trypsin OS=Fusarium oxysporum PE=1 SV=1	trypsin-related protease	18171303	GO:0006508//proteolysis;	-	GO:0004252//serine-type endopeptidase activity;	-
CCM_05834	14.7345	1.77333	-3.05467	0.0274888	0.158902	NW_006271972.1	GO:0016021;GO:0016491;GO:0055114	-	sordNOG08072	R	-	flavin-containing amine oxidasedehydrogenase, putative	18167852	GO:0055114//obsolete oxidation-reduction process;	GO:0016021//integral component of membrane;	GO:0016491//oxidoreductase activity;	-
CCM_06853	15.3237	3.28401	-2.22223	0.0275494	0.158963	NW_006271973.1	-	-	-	-	-	hypothetical protein	18168864	-	-	-	-
CCM_02356	77.3491	17.526	-2.14189	0.0277322	0.159826	NW_006271970.1	GO:0016021	-	-	-	-	hypothetical protein	18164383	-	GO:0016021//integral component of membrane;	-	-
CCM_08401	41.6724	17.436	-1.25702	0.0279667	0.160792	NW_006271975.1	-	-	-	-	-	hypothetical protein	18170409	-	-	-	-
CCM_07210	594.825	267.027	-1.15548	0.0279881	0.160813	NW_006271973.1	GO:0008270	K24684	opiNOG21386;sordNOG04306	R	-	zinc finger protein	18169221	-	-	GO:0008270//zinc ion binding;	-
CCM_01166	10.3467	1.36559	-2.92158	0.028159	0.161414	NW_006271969.1	GO:0016021;GO:0022891;GO:0055085	K08139	opiNOG00669	R	sp|P18631|RAG1_KLULA Low-affinity glucose transporter OS=Kluyveromyces lactis (strain ATCC 8585 / CBS 2359 / DSM 70799 / NBRC 1267 / NRRL Y-1140 / WM37) GN=RAG1 PE=1 SV=1	siderophore iron transporter mirC	18163198	GO:0055085//transmembrane transport;	GO:0016021//integral component of membrane;	-	ko04113(Meiosis - yeast)
CCM_01943	273.793	114.411	-1.25886	0.0288826	0.164192	NW_006271970.1	-	-	opiNOG01492;opiNOG17452;sordNOG09333	Q	sp|O74628|YQ53_SCHPO Uncharacterized oxidoreductase C162.03 OS=Schizosaccharomyces pombe (strain 972 / ATCC 24843) GN=SPCC162.03 PE=3 SV=1	short-chain dehydrogenase, putative	18163972	-	-	-	-
CCM_07219	32.9427	10.5233	-1.64637	0.029479	0.166304	NW_006271973.1	GO:0016021;GO:0006950	-	opiNOG18246;sordNOG11531	S	sp|B3LJA1|RSB1_YEAS1 Sphingoid long-chain base transporter RSB1 OS=Saccharomyces cerevisiae (strain RM11-1a) GN=RSB1 PE=3 SV=2	RTA1 domain protein	18169230	GO:0006950//response to stress;	GO:0016021//integral component of membrane;	-	-
CCM_01264	54.9711	25.6838	-1.09782	0.0295982	0.166585	NW_006271969.1	GO:0016021;GO:0055085	-	sorNOG03298;opiNOG17879;sordNOG11322	G	sp|Q5ATG7|APDF_EMENI Aspyridones efflux protein apdF OS=Emericella nidulans (strain FGSC A4 / ATCC 38163 / CBS 112.46 / NRRL 194 / M139) GN=apdF PE=2 SV=1	MFS monocarboxylate transporter, putative	18163295	GO:0055085//transmembrane transport;	GO:0016021//integral component of membrane;	-	-
CCM_06791	24.9749	8.60671	-1.53695	0.0297955	0.167206	NW_006271973.1	GO:0004190;GO:0006508	-	opiNOG14629;sordNOG08783	O	sp|Q4WFS2|Y1220_ASPFU Probable aspartic-type endopeptidase AFUA_3G01220 OS=Neosartorya fumigata (strain ATCC MYA-4609 / Af293 / CBS 101355 / FGSC A1100) GN=AFUA_3G01220 PE=3 SV=2	aspartic-type endopeptidase, putative	18168802	GO:0006508//proteolysis;	-	GO:0004190//aspartic-type endopeptidase activity;	-
CCM_05279	77.1171	20.6757	-1.89911	0.0299436	0.167787	NW_006271972.1	GO:0006979	-	opiNOG34294;COG1764;pleNOG09016;opiNOG74451	SO	sp|P0A0V4|OHR_XANAC Organic hydroperoxide resistance protein OS=Xanthomonas axonopodis pv. citri (strain 306) GN=ohr PE=3 SV=1	OsmC family protein	18167298	GO:0006979//response to oxidative stress;	-	-	-
CCM_03902	1401.05	277.957	-2.33358	0.0300744	0.168085	NW_006271971.1	GO:0016021	-	opiNOG18273;sordNOG08148;sordNOG09404	S	sp|P35735|SFK1_YEAST Protein SFK1 OS=Saccharomyces cerevisiae (strain ATCC 204508 / S288c) GN=SFK1 PE=1 SV=1	FK506 suppressor Sfk1	18165925	-	GO:0016021//integral component of membrane;	-	-
CCM_06942	724.526	354.865	-1.02977	0.0302783	0.168929	NW_006271973.1	GO:0006281;GO:0016491;GO:0055114	-	opiNOG17657;sordNOG06697	LR	sp|Q9SIE0|ALKB2_ARATH DNA oxidative demethylase ALKBH2 OS=Arabidopsis thaliana GN=ALKBH2 PE=2 SV=2	DNA repair family protein	18168953	GO:0006281//DNA repair;GO:0055114//obsolete oxidation-reduction process;	-	GO:0016491//oxidoreductase activity;	-
CCM_05768	61.507	30.2427	-1.02416	0.0306256	0.16974	NW_006271972.1	-	-	NOG27429;sordNOG09564;opiNOG24098	RS	sp|P22222|E13B_CELCE Glucan endo-1,3-beta-glucosidase OS=Cellulosimicrobium cellulans PE=1 SV=1	glucan endo-1,3-beta-glucosidase precursor, putative	18167786	-	-	-	-
CCM_09018	229.405	47.1229	-2.28339	0.0306355	0.16974	NW_006271975.1	-	-	onyNOG08362;opiNOG54184	S	-	hypothetical protein	18171022	-	-	-	-
CCM_00989	1167.87	565.274	-1.04686	0.0311305	0.171396	NW_006271969.1	-	-	-	-	-	hypothetical protein	18163022	-	-	-	-
CCM_08379	36.8647	11.037	-1.73989	0.0325052	0.176614	NW_006271975.1	GO:0003700;GO:0006355;GO:0043565	-	magNOG10758;sorNOG07822	S	-	hypothetical protein	18170387	GO:0006355//regulation of transcription, DNA-templated;	-	GO:0003700//DNA-binding transcription factor activity;GO:0043565//sequence-specific DNA binding;	-
CCM_09544	1549.69	622.337	-1.31621	0.0325312	0.176614	NW_006271977.1	GO:0022857;GO:0016021;GO:0008643;GO:0055085	K08139	KOG0254;eurotNOG11075;opiNOG05372	R	sp|Q12300|RGT2_YEAST High-affinity glucose transporter RGT2 OS=Saccharomyces cerevisiae (strain ATCC 204508 / S288c) GN=RGT2 PE=1 SV=1	sugar transport protein, putative	18171546	GO:0008643//carbohydrate transport;GO:0055085//transmembrane transport;	GO:0016021//integral component of membrane;	GO:0022857//transmembrane transporter activity;	ko04113(Meiosis - yeast)
CCM_07755	258.948	75.2919	-1.78209	0.0330491	0.178484	NW_006271974.1	-	-	sordNOG15256	S	-	hypothetical protein	18169765	-	-	-	-
CCM_08104	8479.04	4125.53	-1.03932	0.0331953	0.178972	NW_006271974.1	GO:0016021	-	sordNOG14182	S	-	hypothetical protein	18170113	-	GO:0016021//integral component of membrane;	-	-
CCM_08917	5.32823	0	-Inf	0.0335743	0.180442	NW_006271975.1	-	-	-	-	-	hypothetical protein	18170922	-	-	-	-
CCM_03771	8.99966	1.00419	-3.16384	0.0340538	0.182271	NW_006271971.1	-	-	-	-	-	hypothetical protein	18165794	-	-	-	-
CCM_08073	29.1543	7.72363	-1.91636	0.0341158	0.182501	NW_006271974.1	GO:0016021;GO:0005215;GO:0055085	-	sordNOG09533;KOG0254;opiNOG17948	R	sp|S0EEY7|FUS6_GIBF5 Efflux pump FUS6 OS=Gibberella fujikuroi (strain CBS 195.34 / IMI 58289 / NRRL A-6831) GN=FUS6 PE=2 SV=1	Major facilitator superfamily transporter	18170082	GO:0055085//transmembrane transport;	GO:0016021//integral component of membrane;	GO:0005215//transporter activity;	-
CCM_03490	37.5051	16.138	-1.21663	0.0351896	0.186584	NW_006271970.1	GO:0005507;GO:0055114;GO:0016491	-	opiNOG14772	Q	sp|Q96WM9|LAC2_BOTFU Laccase-2 OS=Botryotinia fuckeliana GN=lcc2 PE=2 SV=1	laccase-1 precursor	18165516	GO:0055114//obsolete oxidation-reduction process;	-	GO:0005507//copper ion binding;GO:0016491//oxidoreductase activity;	-
CCM_08014	24.1128	5.256	-2.19776	0.0353197	0.186964	NW_006271974.1	-	-	sorNOG07852;pleNOG08828;sordNOG06515;sorNOG07780;opiNOG27042	Q	sp|Q00278|AFLD_ASPPU Norsolorinic acid ketoreductase OS=Aspergillus parasiticus (strain ATCC 56775 / NRRL 5862 / SRRC 143 / SU-1) GN=aflD PE=1 SV=1	Short-chain dehydrogenase/reductase SDR	18170023	-	-	-	-
CCM_05363	1407.75	416.892	-1.75565	0.0353584	0.186964	NW_006271972.1	GO:0016021;GO:0055085	-	opiNOG03870;sordNOG05297;sorNOG06447	G	sp|Q9US44|YIZG_SCHPO Uncharacterized transporter C1002.16c OS=Schizosaccharomyces pombe (strain 972 / ATCC 24843) GN=SPAC1002.16c PE=3 SV=1	MFS transporter	18167381	GO:0055085//transmembrane transport;	GO:0016021//integral component of membrane;	-	-
CCM_04026	18.0426	5.14639	-1.80978	0.0357715	0.188778	NW_006271971.1	-	-	-	-	-	hypothetical protein	18166049	-	-	-	-
CCM_01982	1803.64	830.041	-1.11966	0.0359374	0.189193	NW_006271970.1	GO:0009099;GO:0046872;GO:0042645;GO:0009097;GO:0055114;GO:0003690;GO:0016853;GO:0000002;GO:0004455	K00053	opiNOG08348;sordNOG05022	E	sp|P38674|ILV5_NEUCR Ketol-acid reductoisomerase, mitochondrial OS=Neurospora crassa (strain ATCC 24698 / 74-OR23-1A / CBS 708.71 / DSM 1257 / FGSC 987) GN=ilv-2 PE=3 SV=2	Ketol-acid reductoisomerase	18164011	GO:0009099//valine biosynthetic process;GO:0009097//isoleucine biosynthetic process;GO:0055114//obsolete oxidation-reduction process;GO:0000002//mitochondrial genome maintenance;	GO:0042645//mitochondrial nucleoid;	GO:0046872//metal ion binding;GO:0003690//double-stranded DNA binding;GO:0016853//isomerase activity;GO:0004455//ketol-acid reductoisomerase activity;	ko00770(Pantothenate and CoA biosynthesis);ko00290(Valine, leucine and isoleucine biosynthesis)
CCM_08990	84.7647	27.8696	-1.60477	0.0361596	0.189843	NW_006271975.1	-	-	sordNOG14676	S	-	hypothetical protein	18170994	-	-	-	-
CCM_08876	2290.54	1120.25	-1.03188	0.0366454	0.191244	NW_006271975.1	GO:0006099;GO:0004108;GO:0005739	K01647	sordNOG05572	C	sp|P34085|CISY_NEUCR Citrate synthase, mitochondrial OS=Neurospora crassa (strain ATCC 24698 / 74-OR23-1A / CBS 708.71 / DSM 1257 / FGSC 987) GN=cit-1 PE=2 SV=2	Citrate synthase	18170881	GO:0006099//tricarboxylic acid cycle;	GO:0005739//mitochondrion;	GO:0004108//citrate (Si)-synthase activity;	ko00630(Glyoxylate and dicarboxylate metabolism);ko00020(Citrate cycle (TCA cycle))
CCM_02506	1114.2	121.36	-3.19865	0.0369689	0.192042	NW_006271970.1	GO:0004096;GO:0055114;GO:0098869;GO:0020037;GO:0006979;GO:0042744;GO:0046872	K03781	sordNOG04138	P	sp|Q9C168|CAT1_NEUCR Catalase-1 OS=Neurospora crassa (strain ATCC 24698 / 74-OR23-1A / CBS 708.71 / DSM 1257 / FGSC 987) GN=cat-1 PE=1 SV=2	catalase A	18164533	GO:0055114//obsolete oxidation-reduction process;GO:0098869//cellular oxidant detoxification;GO:0006979//response to oxidative stress;GO:0042744//hydrogen peroxide catabolic process;	-	GO:0004096//catalase activity;GO:0020037//heme binding;GO:0046872//metal ion binding;	ko05208(Chemical carcinogenesis - reactive oxygen species);ko05022(Pathways of neurodegeneration - multiple diseases);ko05014(Amyotrophic lateral sclerosis);ko04213(Longevity regulating pathway - multiple species);ko04212(Longevity regulating pathway - worm);ko04211(Longevity regulating pathway);ko04146(Peroxisome);ko04068(FoxO signaling pathway);ko04016(MAPK signaling pathway - plant);ko04011(MA…
CCM_01997	295.781	138.88	-1.09069	0.0370218	0.192166	NW_006271970.1	GO:0016491;GO:0008270;GO:0055114	-	sordNOG04128	Q	sp|Q53FA7|QORX_HUMAN Quinone oxidoreductase PIG3 OS=Homo sapiens GN=TP53I3 PE=1 SV=2	quinone oxidoreductase, putative	18164026	GO:0055114//obsolete oxidation-reduction process;	-	GO:0016491//oxidoreductase activity;GO:0008270//zinc ion binding;	-
CCM_02143	200.074	97.1896	-1.04166	0.0373806	0.193639	NW_006271970.1	GO:0016021	-	sordNOG11083	S	-	hypothetical protein	18164171	-	GO:0016021//integral component of membrane;	-	-
CCM_04910	861.502	318.391	-1.43605	0.0375619	0.194335	NW_006271971.1	GO:0055114;GO:0004754;GO:0019878	K05665	opiNOG03462;NOG13157	E	sp|Q7SFX6|LYS1_NEUCR Saccharopine dehydrogenase [NAD(+), L-lysine-forming] OS=Neurospora crassa (strain ATCC 24698 / 74-OR23-1A / CBS 708.71 / DSM 1257 / FGSC 987) GN=NCU03118 PE=3 SV=1	saccharopine dehydrogenase	18166931	GO:0055114//obsolete oxidation-reduction process;GO:0019878//lysine biosynthetic process via aminoadipic acid;	-	GO:0004754//saccharopine dehydrogenase (NAD+, L-lysine-forming) activity;	ko05206(MicroRNAs in cancer);ko04977(Vitamin digestion and absorption);ko04071(Sphingolipid signaling pathway);ko02010(ABC transporters);ko01523(Antifolate resistance)
CCM_00413	80.5628	34.514	-1.22293	0.0380235	0.196253	NW_006271969.1	GO:0016021;GO:0016491;GO:0055114;GO:0006633;GO:0005506	-	eurotNOG03053;opiNOG24129	S	sp|A0A024FA41|VLMA_LECSP Fatty acid hydroxylase vlmA OS=Lecanicillium sp. GN=vlmA PE=3 SV=1	Fatty acid hydroxylase	18162448	GO:0055114//obsolete oxidation-reduction process;GO:0006633//fatty acid biosynthetic process;	GO:0016021//integral component of membrane;	GO:0016491//oxidoreductase activity;GO:0005506//iron ion binding;	-
CCM_07333	368.999	75.3345	-2.29223	0.0381366	0.196362	NW_006271974.1	-	-	-	-	-	hypothetical protein	18169344	-	-	-	-
CCM_04310	241.522	58.227	-2.0524	0.0384659	0.197528	NW_006271971.1	GO:0043039;GO:0005524;GO:0004812	-	opiNOG19092;COG2872;sorNOG04830	R	sp|O57734|ALAXL_PYRHO Alanyl-tRNA editing protein AlaX-L OS=Pyrococcus horikoshii (strain ATCC 700860 / DSM 12428 / JCM 9974 / NBRC 100139 / OT-3) GN=alaXL PE=3 SV=1	alanyl-tRNA synthetase	18166333	GO:0043039//tRNA aminoacylation;	-	GO:0005524//ATP binding;GO:0004812//aminoacyl-tRNA ligase activity;	-
CCM_08232	21.0041	6.7007	-1.64829	0.0385524	0.197761	NW_006271974.1	-	-	-	-	-	hypothetical protein	18170240	-	-	-	-
CCM_04987	1978.33	558.61	-1.82437	0.0386028	0.197808	NW_006271971.1	GO:0015067	K00613	opiNOG03771	E	sp|P50441|GATM_PIG Glycine amidinotransferase, mitochondrial OS=Sus scrofa GN=GATM PE=1 SV=2	amidinotransferase	18167007	-	-	GO:0015067//amidinotransferase activity;	ko00330(Arginine and proline metabolism);ko00260(Glycine, serine and threonine metabolism)
CCM_02674	90.3566	0.682795	-7.04803	0.0387935	0.198363	NW_006271970.1	GO:0055114;GO:0016491	-	sordNOG11171;sorNOG02601;opiNOG20662	Q	sp|Q9RPT1|RHLG_PSEAE Rhamnolipids biosynthesis 3-oxoacyl-[acyl-carrier-protein] reductase OS=Pseudomonas aeruginosa (strain ATCC 15692 / DSM 22644 / CIP 104116 / JCM 14847 / LMG 12228 / 1C / PRS 101 / PAO1) GN=rhlG PE=1 SV=1	short chain dehydrogenase/reductase family	18164701	GO:0055114//obsolete oxidation-reduction process;	-	GO:0016491//oxidoreductase activity;	-
CCM_00339	66.9058	23.2751	-1.52334	0.039205	0.199723	NW_006271969.1	-	-	-	-	-	hypothetical protein	18162374	-	-	-	-
CCM_03653	47.4867	15.7712	-1.59023	0.0394054	0.200345	NW_006271971.1	-	-	eurotNOG03541;opiNOG53463;necNOG08193	R	sp|D4ALG0|LYSM1_ARTBC LysM domain-containing protein ARB_05157 OS=Arthroderma benhamiae (strain ATCC MYA-4681 / CBS 112371) GN=ARB_05157 PE=1 SV=1	LysM domain protein, putative	18165679	-	-	-	-
CCM_05695	9.69336	1.3665	-2.82652	0.0399093	0.20192	NW_006271972.1	-	-	sordNOG05309;NOG117477	S	-	hypothetical protein	18167713	-	-	-	-
CCM_02149	7.65079	0.6837	-3.48417	0.0400865	0.202482	NW_006271970.1	GO:0006637;GO:0047617	-	opiNOG43632;sordNOG04490	S	-	acyl-CoA thioesterase	18164177	GO:0006637//acyl-CoA metabolic process;	-	GO:0047617//acyl-CoA hydrolase activity;	-
CCM_04993	14.9837	3.60721	-2.05444	0.0401889	0.202482	NW_006271971.1	GO:0016787;GO:0008152	-	sorNOG02147;opiNOG13573;sordNOG06996	V	sp|P53184|PNC1_YEAST Nicotinamidase OS=Saccharomyces cerevisiae (strain ATCC 204508 / S288c) GN=PNC1 PE=1 SV=1	isochorismatase family hydrolase, putative	18167013	GO:0008152//metabolic process;	-	GO:0016787//hydrolase activity;	-
CCM_08700	78.6581	36.1969	-1.11973	0.0404748	0.202859	NW_006271975.1	GO:0016021;GO:0098655;GO:0019829;GO:0030001;GO:0046872;GO:0000166	K01532	opiNOG08641;sordNOG10509	P	sp|P38360|ATU1_YEAST P-type cation-transporting ATPase OS=Saccharomyces cerevisiae (strain ATCC 204508 / S288c) GN=PCA1 PE=1 SV=2	cation transport ATPase	18170706	GO:0098655//cation transmembrane transport;GO:0030001//metal ion transport;	GO:0016021//integral component of membrane;	GO:0019829//ATPase-coupled cation transmembrane transporter activity;GO:0046872//metal ion binding;GO:0000166//nucleotide binding;	-
CCM_00889	22.5818	7.62126	-1.56706	0.0408737	0.204115	NW_006271969.1	GO:0008270;GO:0016491;GO:0055114	-	sorNOG07044;COG0604	C	sp|P0DN30|RTAI1_ARTBC Probable zinc-binding oxidoreductase, mitochondrial OS=Arthroderma benhamiae (strain ATCC MYA-4681 / CBS 112371) GN=ARB_02327-2 PE=3 SV=1	zinc-binding oxidoreductase, putative	18162923	GO:0055114//obsolete oxidation-reduction process;	-	GO:0008270//zinc ion binding;GO:0016491//oxidoreductase activity;	-
CCM_03169	5.01122	0	-Inf	0.0420521	0.20816	NW_006271970.1	GO:0006508;GO:0004252	-	sordNOG05989;opiNOG22565;opiNOG19296	O	sp|Q00208|ORYZ_EMENI Alkaline protease 1 OS=Emericella nidulans (strain FGSC A4 / ATCC 38163 / CBS 112.46 / NRRL 194 / M139) GN=alp1 PE=2 SV=1	alkaline serine protease Alp1	18165196	GO:0006508//proteolysis;	-	GO:0004252//serine-type endopeptidase activity;	-
CCM_07782	1335.29	403.732	-1.72568	0.042425	0.209252	NW_006271974.1	GO:0016021;GO:0004553;GO:0005975	-	sordNOG09183;opiNOG01397;pleNOG00625	S	sp|Q8N0N3|BGBP_PENMO Beta-1,3-glucan-binding protein OS=Penaeus monodon PE=2 SV=1	secreted glucosidase, putative	18169792	GO:0005975//carbohydrate metabolic process;	GO:0016021//integral component of membrane;	GO:0004553//hydrolase activity, hydrolyzing O-glycosyl compounds;	-
CCM_05220	21.3004	6.76397	-1.65494	0.0425375	0.209488	NW_006271972.1	-	-	opiNOG62687;opiNOG47607	R	-	hypothetical protein	18167239	-	-	-	-
CCM_01155	447.998	220.63	-1.02187	0.0431101	0.211653	NW_006271969.1	-	-	opiNOG52087	S	sp|P32959|PBPE_BACSU Penicillin-binding protein 4* OS=Bacillus subtilis (strain 168) GN=pbpE PE=1 SV=1	beta-lactamase family protein	18163187	-	-	-	-
CCM_01125	113.807	55.0586	-1.04755	0.0436129	0.213544	NW_006271969.1	GO:0006468;GO:0004672;GO:0005524	-	sordNOG06704;hypNOG14133;opiNOG00173	T	sp|Q91VB2|KCC1G_MOUSE Calcium/calmodulin-dependent protein kinase type 1G OS=Mus musculus GN=Camk1g PE=1 SV=1	Protein kinase-like domain	18163157	GO:0006468//protein phosphorylation;	-	GO:0004672//protein kinase activity;GO:0005524//ATP binding;	-
CCM_07555	45.0793	21.2941	-1.08201	0.044496	0.21603	NW_006271974.1	-	-	opiNOG33821;sordNOG13667	S	-	hypothetical protein	18169566	-	-	-	-
CCM_02996	549.364	198.17	-1.47102	0.0459326	0.220444	NW_006271970.1	GO:0006147;GO:0005829;GO:0008270;GO:0008892	K01487	opiNOG00968;sordNOG11811	F	sp|O14057|GUAD_SCHPO Probable guanine deaminase OS=Schizosaccharomyces pombe (strain 972 / ATCC 24843) GN=SPCC1672.03c PE=3 SV=1	guanine deaminase	18165023	GO:0006147//guanine catabolic process;	GO:0005829//cytosol;	GO:0008270//zinc ion binding;GO:0008892//guanine deaminase activity;	ko00230(Purine metabolism)
CCM_04367	194.811	83.3636	-1.22459	0.0462441	0.221497	NW_006271971.1	-	-	-	-	-	hypothetical protein	18166390	-	-	-	-
CCM_03409	1003.52	228.894	-2.13232	0.0464322	0.221956	NW_006271970.1	GO:0016021	-	sordNOG10271;opiNOG05542	S	sp|Q08219|RRT8_YEAST Outer spore wall protein RRT8 OS=Saccharomyces cerevisiae (strain ATCC 204508 / S288c) GN=RRT8 PE=1 SV=2	hypothetical protein	18165435	-	GO:0016021//integral component of membrane;	-	-
CCM_07920	40.4511	18.9591	-1.09328	0.0476044	0.225207	NW_006271974.1	-	-	-	-	-	hypothetical protein	18169930	-	-	-	-
CCM_03830	22.6381	7.93813	-1.51188	0.0477467	0.225744	NW_006271971.1	-	-	-	-	-	hypothetical protein	18165853	-	-	-	-
CCM_02440	4.94457	0	-Inf	0.0497023	0.231852	NW_006271970.1	-	-	-	-	-	hypothetical protein	18164467	-	-	-	-
CCM_07201	66.8124	30.7911	-1.1176	0.0498557	0.232089	NW_006271973.1	-	-	opiNOG28911;sordNOG07666;sorNOG06886	S	-	hypothetical protein	18169212	-	-	-	-
CCM_07957	340.401	148.925	-1.19265	0.0499455	0.232394	NW_006271974.1	GO:0016787;GO:0008152	-	opiNOG17017;sordNOG11640;sorNOG06318	RE	sp|A3KG59|P20D2_MOUSE Peptidase M20 domain-containing protein 2 OS=Mus musculus GN=Pm20d2 PE=1 SV=1	amidohydrolase	18169967	GO:0008152//metabolic process;	-	GO:0016787//hydrolase activity;	-
CCM_07708	4054	56549.6	3.8021	1.3009e-39	1.56319e-36	NW_006271974.1	-	-	-	-	-	hypothetical protein	18169718	-	-	-	-
CCM_09403	520.803	6940.65	3.73626	1.34954e-37	1.44146e-34	NW_006271977.1	GO:0016021	-	sordNOG14330	S	-	hypothetical protein	18171406	-	GO:0016021//integral component of membrane;	-	-
CCM_01567	337.802	3611.55	3.41837	7.13478e-32	5.71556e-29	NW_006271969.1	-	-	hypNOG02587	S	-	hypothetical protein	18163598	-	-	-	-
CCM_00853	581.809	5052.1	3.11827	4.91235e-28	3.14816e-25	NW_006271969.1	-	-	NOG00044;eurotNOG05566;sordNOG07556	VS	-	hypothetical protein	18162887	-	-	-	-
CCM_06731	118.813	1976.42	4.05613	1.57921e-25	8.92997e-23	NW_006271973.1	-	-	opiNOG55198;sordNOG13094;opiNOG64258;opiNOG64081	KS	-	bZIP transcription factor	18168745	-	-	-	-
CCM_02053	6945.37	59434.9	3.09719	4.30355e-25	2.29833e-22	NW_006271970.1	-	-	-	-	-	hypothetical protein	18164082	-	-	-	-
CCM_06119	1385.16	37099.7	4.74328	3.62748e-23	1.83531e-20	NW_006271972.1	-	-	-	-	-	hypothetical protein	18168134	-	-	-	-
CCM_01555	577.088	3601.32	2.64166	3.95316e-21	1.80961e-18	NW_006271969.1	-	-	sorNOG02083;opiNOG30352	R	sp|P40618|HMGB3_CHICK High mobility group protein B3 OS=Gallus gallus GN=HMGB3 PE=2 SV=3	High mobility group, superfamily	18163586	-	-	-	-
CCM_08211	92.8505	680.621	2.87387	4.79426e-20	1.84349e-17	NW_006271974.1	GO:0055114;GO:0016491;GO:0071949	K00480	sordNOG09357;opiNOG00334	CR	sp|B6D1N4|HPXO_KLEPN FAD-dependent urate hydroxylase OS=Klebsiella pneumoniae GN=hpxO PE=3 SV=1	salicylate hydroxylase, putative	18170219	GO:0055114//obsolete oxidation-reduction process;	-	GO:0016491//oxidoreductase activity;GO:0071949//FAD binding;	ko00626(Naphthalene degradation);ko00624(Polycyclic aromatic hydrocarbon degradation);ko00621(Dioxin degradation)
CCM_04962	631.103	3150.41	2.31959	8.87077e-17	2.56967e-14	NW_006271971.1	GO:0004497;GO:0016021;GO:0055114;GO:0016705;GO:0020037;GO:0005506	-	sordNOG06596;sordNOG07153	Q	sp|O13317|TRI11_FUSSP Trichothecene C-15 hydroxylase OS=Fusarium sporotrichioides GN=TRI11 PE=2 SV=1	cytochrome P450 3A17	18166982	GO:0055114//obsolete oxidation-reduction process;	GO:0016021//integral component of membrane;	GO:0004497//monooxygenase activity;GO:0016705//oxidoreductase activity, acting on paired donors, with incorporation or reduction of molecular oxygen;GO:0020037//heme binding;GO:0005506//iron ion binding;	-
CCM_04517	1761.9	8435.68	2.25937	9.08859e-17	2.56967e-14	NW_006271971.1	-	K20062	sordNOG04964	R	sp|B8N4G0|CRED_ASPFN Probable HECT-type ubiquitin ligase-interacting protein creD OS=Aspergillus flavus (strain ATCC 200026 / FGSC A1120 / NRRL 3357 / JCM 12722 / SRRC 167) GN=creD PE=3 SV=1	carbon catabolite repression protein CreD, putative	18166540	-	-	-	-
CCM_08923	332.953	3905.9	3.55226	1.0284e-16	2.82459e-14	NW_006271975.1	GO:0004499;GO:0016021;GO:0050661;GO:0050660;GO:0055114	K00485	opiNOG19675	Q	sp|Q01740|FMO1_HUMAN Dimethylaniline monooxygenase [N-oxide-forming] 1 OS=Homo sapiens GN=FMO1 PE=1 SV=3	dimethylaniline monooxygenase	18170928	GO:0055114//obsolete oxidation-reduction process;	GO:0016021//integral component of membrane;	GO:0004499//N,N-dimethylaniline monooxygenase activity;GO:0050661//NADP binding;GO:0050660//flavin adenine dinucleotide binding;	ko00982(Drug metabolism - cytochrome P450)
CCM_09199	70.5509	498.338	2.82039	1.42847e-16	3.81441e-14	NW_006271976.1	GO:0009088;GO:0004072;GO:0016310;GO:0009089	K00928	opiNOG03785;sordNOG08577	E	sp|W7MS01|FUB3_GIBM7 Aspartate kinase FUB3 OS=Gibberella moniliformis (strain M3125 / FGSC 7600) GN=FUB3 PE=1 SV=1	aspartokinase	18171202	GO:0009088//threonine biosynthetic process;GO:0016310//phosphorylation;GO:0009089//lysine biosynthetic process via diaminopimelate;	-	GO:0004072//aspartate kinase activity;	ko00300(Lysine biosynthesis);ko00270(Cysteine and methionine metabolism);ko00261(Monobactam biosynthesis);ko00260(Glycine, serine and threonine metabolism)
CCM_02084	394.562	1917.79	2.28112	6.38538e-16	1.65899e-13	NW_006271970.1	GO:0055114;GO:0005506;GO:0016712;GO:0020037	-	KOG0157;opiNOG02188;sordNOG07509	Q	sp|P30607|CP52B_CANTR Cytochrome P450 52A2 OS=Candida tropicalis GN=CYP52A2 PE=1 SV=1	cytochrome P450 family protein, putative	18164113	GO:0055114//obsolete oxidation-reduction process;	-	GO:0005506//iron ion binding;GO:0016712//oxidoreductase activity, acting on paired donors, with incorporation or reduction of molecular oxygen, reduced flavin or flavoprotein as one donor, and incorporation of one atom of oxygen;GO:0020037//heme binding;	-
CCM_02085	66.4134	420.813	2.66363	7.72002e-16	1.95296e-13	NW_006271970.1	GO:0016021;GO:0006810;GO:0005215	-	opiNOG07665;sordNOG06852	G	sp|Q51389|GLPF_PSEAE Glycerol uptake facilitator protein OS=Pseudomonas aeruginosa (strain ATCC 15692 / DSM 22644 / CIP 104116 / JCM 14847 / LMG 12228 / 1C / PRS 101 / PAO1) GN=glpF PE=3 SV=2	glycerol uptake facilitator, putative	18164114	GO:0006810//transport;	GO:0016021//integral component of membrane;	GO:0005215//transporter activity;	-
CCM_07562	6.61376	114.277	4.11092	1.90941e-15	4.70646e-13	NW_006271974.1	-	-	-	-	-	hypothetical protein	18169573	-	-	-	-
CCM_00072	691.832	3311.87	2.25915	5.33964e-15	1.25195e-12	NW_006271969.1	GO:0003700;GO:0008270;GO:0043565;GO:0006355	-	sordNOG11261	K	sp|Q00858|CGPB_FUSSO Cutinase gene palindrome-binding protein OS=Fusarium solani subsp. pisi PE=2 SV=1	Cutinase palindrome-binding protein	18162107	GO:0006355//regulation of transcription, DNA-templated;	-	GO:0003700//DNA-binding transcription factor activity;GO:0008270//zinc ion binding;GO:0043565//sequence-specific DNA binding;	-
CCM_07300	2065.12	8797.23	2.09082	8.50739e-15	1.9019e-12	NW_006271973.1	GO:0016021	-	opiNOG22506;sordNOG09094	S	-	hypothetical protein	18169311	-	GO:0016021//integral component of membrane;	-	-
CCM_08427	1603.74	6791.73	2.08234	1.41016e-14	3.01242e-12	NW_006271975.1	GO:0016021	-	opiNOG26446;opiNOG20370;sordNOG09264	TS	-	hypothetical protein	18170435	-	GO:0016021//integral component of membrane;	-	-
CCM_06333	14872	61561.2	2.04942	1.92993e-14	4.03314e-12	NW_006271972.1	-	-	sordNOG14094;opiNOG38256	S	-	hypothetical protein	18168347	-	-	-	-
CCM_02122	8092.56	37461.4	2.21074	1.07664e-13	2.11219e-11	NW_006271970.1	-	-	opiNOG64166;hypNOG02574	S	-	hypothetical protein	18164150	-	-	-	-
CCM_01572	307.552	1342.75	2.12629	1.10115e-13	2.11706e-11	NW_006271969.1	GO:0008080	-	opiNOG64805;opiNOG42566	R	-	Acyl-CoA N-acyltransferase	18163603	-	-	GO:0008080//N-acetyltransferase activity;	-
CCM_00492	315.07	1594.9	2.33972	3.99687e-13	7.24941e-11	NW_006271969.1	GO:0055085;GO:0016021	-	KOG3098;fuNOG23719;eurotNOG00684;opiNOG70024;opiNOG70343	S	sp|Q9URX1|YLX5_SCHPO UNC93-like protein C922.05c OS=Schizosaccharomyces pombe (strain 972 / ATCC 24843) GN=SPAC922.05c PE=3 SV=1	MFS transporter, putative	18162527	GO:0055085//transmembrane transport;	GO:0016021//integral component of membrane;	-	-
CCM_02989	571.962	2288.68	2.00052	5.96039e-13	1.04177e-10	NW_006271970.1	-	-	opiNOG39306;sordNOG13256;NOG135430	S	-	DNA repair protein (Rad57), putative	18165016	-	-	-	-
CCM_08393	342.454	1373.44	2.00381	1.14557e-12	1.93199e-10	NW_006271975.1	-	-	sordNOG08482	S	-	hypothetical protein	18170401	-	-	-	-
CCM_00215	386.404	1448.25	1.90613	1.18462e-11	1.75197e-09	NW_006271969.1	GO:0009277;GO:0016740;GO:0005975;GO:0005886;GO:0031225	K22834	sordNOG08814	R	sp|B0Y8H9|GEL2_ASPFC 1,3-beta-glucanosyltransferase gel2 OS=Neosartorya fumigata (strain CEA10 / CBS 144.89 / FGSC A1163) GN=gel2 PE=1 SV=1	1,3-beta-glucanosyltransferase Gel2	18162250	GO:0005975//carbohydrate metabolic process;	GO:0009277//fungal-type cell wall;GO:0005886//plasma membrane;GO:0031225//anchored component of membrane;	GO:0016740//transferase activity;	-
CCM_07694	159.648	1018.18	2.67303	2.51176e-11	3.55081e-09	NW_006271974.1	GO:0006357;GO:0008270;GO:0005634;GO:0000981	-	opiNOG58805;necNOG12649	S	-	Fungal transcriptional regulatory protein	18169704	GO:0006357//regulation of transcription by RNA polymerase II;	GO:0005634//nucleus;	GO:0008270//zinc ion binding;GO:0000981//DNA-binding transcription factor activity, RNA polymerase II-specific;	-
CCM_08572	111.251	759.391	2.77103	2.80411e-11	3.90666e-09	NW_006271975.1	GO:0016021;GO:0000297;GO:0000329;GO:1903710;GO:1903711;GO:0005886;GO:0015606	-	sordNOG04984	R	sp|A0A161CLJ6|MRR1_MONRU Citrinin biosynthesis cluster MFS transporter mrr1 OS=Monascus ruber GN=mrr1 PE=3 SV=1	bicyclomycin resistance protein, putative	18170578	GO:1903710//spermine transmembrane transport;GO:1903711//spermidine transmembrane transport;	GO:0016021//integral component of membrane;GO:0000329//fungal-type vacuole membrane;GO:0005886//plasma membrane;	GO:0000297//spermine transmembrane transporter activity;GO:0015606//spermidine transmembrane transporter activity;	-
CCM_01699	2065.7	6947.24	1.74981	5.47926e-11	7.45972e-09	NW_006271969.1	GO:0016021	-	sordNOG06690;hypNOG01426;opiNOG24115	S	-	hypothetical protein	18163729	-	GO:0016021//integral component of membrane;	-	-
CCM_08664	262.136	1428.65	2.44627	6.15556e-11	8.21853e-09	NW_006271975.1	GO:0071949;GO:0016021;GO:0016491;GO:0055114	K00480	saccNOG08130;opiNOG07069	C	sp|J4VWM7|OPS4_BEAB2 FAD-dependent monooxygenase OpS4 OS=Beauveria bassiana (strain ARSEF 2860) GN=OpS4 PE=1 SV=1	Salicylate hydroxylase	18170670	GO:0055114//obsolete oxidation-reduction process;	GO:0016021//integral component of membrane;	GO:0071949//FAD binding;GO:0016491//oxidoreductase activity;	ko00626(Naphthalene degradation);ko00624(Polycyclic aromatic hydrocarbon degradation);ko00621(Dioxin degradation)
CCM_02795	307.714	1111.43	1.85275	6.24122e-11	8.21874e-09	NW_006271970.1	GO:0004499;GO:0050661;GO:0055114;GO:0050660	K03379	opiNOG03405;opiNOG54376	Q	sp|P12015|CHMO_ACISP Cyclohexanone 1,2-monooxygenase OS=Acinetobacter sp. PE=1 SV=2	NAD(P)-binding domain	18164822	GO:0055114//obsolete oxidation-reduction process;	-	GO:0004499//N,N-dimethylaniline monooxygenase activity;GO:0050661//NADP binding;GO:0050660//flavin adenine dinucleotide binding;	ko00930(Caprolactam degradation)
CCM_00567	14.0382	110.903	2.98188	1.77941e-10	2.25072e-08	NW_006271969.1	-	-	-	-	-	hypothetical protein	18162602	-	-	-	-
CCM_08593	3959.31	12642.3	1.67494	2.94093e-10	3.67157e-08	NW_006271975.1	-	-	sordNOG07590	S	-	hypothetical protein	18170599	-	-	-	-
CCM_00187	167.911	621.121	1.88718	3.3911e-10	4.17931e-08	NW_006271969.1	GO:0003993;GO:0046872;GO:0016311	K22390	opiNOG03139;sorNOG06777;sordNOG10471	G	sp|Q12546|PPA_ASPFI Acid phosphatase OS=Aspergillus ficuum GN=aphA PE=1 SV=1	metallophosphoesterase	18162222	GO:0016311//dephosphorylation;	-	GO:0003993//acid phosphatase activity;GO:0046872//metal ion binding;	-
CCM_04300	259.933	903.498	1.79738	3.89646e-10	4.68209e-08	NW_006271971.1	GO:0055085;GO:0016021	K19792	opiNOG04453;COG5478;sordNOG08180	SP	sp|P40988|FET4_YEAST Low-affinity Fe(2+) transport protein OS=Saccharomyces cerevisiae (strain ATCC 204508 / S288c) GN=FET4 PE=1 SV=2	low affinity iron transporter, putative	18166323	GO:0055085//transmembrane transport;	GO:0016021//integral component of membrane;	-	-
CCM_06770	920.482	2964.91	1.68753	5.72783e-10	6.71483e-08	NW_006271973.1	GO:0055114;GO:0016491	-	NOG15337;opiNOG51224	QR	sp|P87219|SOU1_CANAL Sorbose reductase SOU1 OS=Candida albicans (strain SC5314 / ATCC MYA-2876) GN=SOU1 PE=1 SV=1	short-chain dehydrogenase, putative	18168783	GO:0055114//obsolete oxidation-reduction process;	-	GO:0016491//oxidoreductase activity;	-
CCM_09561	936.033	2982.39	1.67184	6.34255e-10	7.25844e-08	NW_006271977.1	GO:0008152;GO:0016021;GO:0008484	-	opiNOG19445	R	-	sulfatase domain protein	18171563	GO:0008152//metabolic process;	GO:0016021//integral component of membrane;	GO:0008484//sulfuric ester hydrolase activity;	-
CCM_06012	1162.71	3571.83	1.61917	1.49913e-09	1.60124e-07	NW_006271972.1	GO:0004674;GO:0006468;GO:0003746;GO:0005524;GO:0006414	-	sordNOG09344;opiNOG16306	RD	sp|Q6B9X6|VWKA_DICDI Alpha-protein kinase vwkA OS=Dictyostelium discoideum GN=vwkA PE=1 SV=1	eukaroytic elongation factor 2 kinase	18168030	GO:0006468//protein phosphorylation;GO:0006414//translational elongation;	-	GO:0004674//protein serine/threonine kinase activity;GO:0003746//translation elongation factor activity;GO:0005524//ATP binding;	-
CCM_05548	1093.83	3377.5	1.62657	1.85274e-09	1.9151e-07	NW_006271972.1	-	-	onyNOG06402;COG0666;sordNOG07082	MR	sp|P53356|HTK16_HYDVU Tyrosine-protein kinase HTK16 OS=Hydra vulgaris GN=HTK16 PE=2 SV=1	ankyrin 2,3/unc44	18167566	-	-	-	-
CCM_04301	65.9493	271.886	2.04357	1.87789e-09	1.92044e-07	NW_006271971.1	-	-	fuNOG17410;opiNOG38770	S	-	hypothetical protein	18166324	-	-	-	-
CCM_09345	50.8405	225.86	2.15138	2.0443e-09	2.04707e-07	NW_006271977.1	GO:0055114;GO:0016491;GO:0008270	-	opiNOG24487;COG0604;opiNOG17019;opiNOG50218	QC	sp|Q8J0F9|MLCG_PENCI Deshydrogenase mlcG OS=Penicillium citrinum GN=mlcG PE=1 SV=1	alcohol dehydrogenase, putative	18171348	GO:0055114//obsolete oxidation-reduction process;	-	GO:0016491//oxidoreductase activity;GO:0008270//zinc ion binding;	-
CCM_06117	48449.4	145152	1.58302	2.21817e-09	2.19827e-07	NW_006271972.1	-	-	sordNOG14586;magNOG13084;sordNOG14705;opiNOG63634	S	-	hypothetical protein	18168132	-	-	-	-
CCM_02093	1652.79	4953.05	1.58341	3.47997e-09	3.3453e-07	NW_006271970.1	-	-	opiNOG47220	R	-	hypothetical protein	18164122	-	-	-	-
CCM_08437	2608.79	7750.55	1.57092	3.5249e-09	3.35493e-07	NW_006271975.1	GO:0006950;GO:0016021	-	hypNOG05719;sordNOG13197	S	-	hypothetical protein	18170445	GO:0006950//response to stress;	GO:0016021//integral component of membrane;	-	-
CCM_00516	572.913	1756	1.6159	3.96295e-09	3.73489e-07	NW_006271969.1	-	-	sordNOG14628	R	-	Tetratricopeptide-like helical	18162551	-	-	-	-
CCM_00644	457.375	1421.56	1.63602	4.43086e-09	4.05655e-07	NW_006271969.1	GO:0046872	-	opiNOG56341	R	-	hypothetical protein	18162679	-	-	GO:0046872//metal ion binding;	-
CCM_02087	172.775	585.684	1.76123	4.55874e-09	4.13426e-07	NW_006271970.1	GO:0016787;GO:0016021	K12350	sordNOG09160;sorNOG05341;opiNOG14637	GI	sp|Q23498|ASM2_CAEEL Sphingomyelin phosphodiesterase 2 OS=Caenorhabditis elegans GN=asm-2 PE=1 SV=3	acid sphingomyelinase, putative	18164116	-	GO:0016021//integral component of membrane;	GO:0016787//hydrolase activity;	ko04217(Necroptosis);ko04142(Lysosome);ko04071(Sphingolipid signaling pathway);ko00600(Sphingolipid metabolism)
CCM_00437	1432.41	4249.45	1.56883	5.10251e-09	4.58415e-07	NW_006271969.1	GO:0016021;GO:0055085	-	sordNOG06957;opiNOG13884	R	sp|Q10072|YAN6_SCHPO Uncharacterized transporter C3H1.06c OS=Schizosaccharomyces pombe (strain 972 / ATCC 24843) GN=SPAC3H1.06c PE=3 SV=1	MFS multidrug transporter, putative	18162472	GO:0055085//transmembrane transport;	GO:0016021//integral component of membrane;	-	-
CCM_07480	1642.03	4900.07	1.57732	5.15562e-09	4.58898e-07	NW_006271974.1	GO:0016614;GO:0055114;GO:0050660	-	sordNOG08147;opiNOG06135	R	sp|P18172|DHGL_DROPS Glucose dehydrogenase [FAD, quinone] OS=Drosophila pseudoobscura pseudoobscura GN=Gld PE=3 SV=4	GMC oxidoreductase, putative	18169491	GO:0055114//obsolete oxidation-reduction process;	-	GO:0016614//oxidoreductase activity, acting on CH-OH group of donors;GO:0050660//flavin adenine dinucleotide binding;	-
CCM_09114	31165.6	182778	2.55206	7.56842e-09	6.61411e-07	NW_006271976.1	GO:0055114;GO:0016627;GO:0046872	-	opiNOG05243;KOG0137	I	sp|Q8J130|TYRO_ASPFU Tyrosinase OS=Neosartorya fumigata (strain ATCC MYA-4609 / Af293 / CBS 101355 / FGSC A1100) GN=tyr1 PE=3 SV=2	Di-copper centre-containing	18171117	GO:0055114//obsolete oxidation-reduction process;	-	GO:0016627//oxidoreductase activity, acting on the CH-CH group of donors;GO:0046872//metal ion binding;	-
CCM_00290	3656.06	10287.1	1.49248	1.38554e-08	1.17869e-06	NW_006271969.1	-	-	opiNOG75721;hypNOG02404;opiNOG44907;sorNOG07971	SR	sp|D4B2H3|ALL7_ARTBC Allergen Asp f 7 homolog OS=Arthroderma benhamiae (strain ATCC MYA-4681 / CBS 112371) GN=ARB_02701 PE=3 SV=1	speract/scavenger receptor domain-containing protein	18162325	-	-	-	-
CCM_07703	459.782	1376.16	1.58163	1.51787e-08	1.27994e-06	NW_006271974.1	GO:0006508;GO:0004222;GO:0046872	K13726	opiNOG14332;opiNOG23877	O	sp|P25375|PRTD_YEAST Saccharolysin OS=Saccharomyces cerevisiae (strain ATCC 204508 / S288c) GN=PRD1 PE=1 SV=1	metallopeptidase MepB	18169713	GO:0006508//proteolysis;	-	GO:0004222//metalloendopeptidase activity;GO:0046872//metal ion binding;	-
CCM_05091	2217.85	6253.09	1.49541	1.75842e-08	1.46989e-06	NW_006271972.1	GO:0005887;GO:0015079;GO:0071805	-	opiNOG19103	S	sp|P47114|YJ24_YEAST Uncharacterized vacuolar membrane protein YJR054W OS=Saccharomyces cerevisiae (strain ATCC 204508 / S288c) GN=YJR054W PE=1 SV=1	hypothetical protein	18167111	GO:0071805//potassium ion transmembrane transport;	GO:0005887//integral component of plasma membrane;	GO:0015079//potassium ion transmembrane transporter activity;	-
CCM_07365	3366.89	9399.27	1.48113	2.00091e-08	1.65817e-06	NW_006271974.1	-	-	sordNOG04429	S	sp|Q04608|YD124_YEAST Uncharacterized protein YDR124W OS=Saccharomyces cerevisiae (strain ATCC 204508 / S288c) GN=YDR124W PE=1 SV=1	kinesin, putative	18169376	-	-	-	-
CCM_01568	675.257	1937.28	1.52052	2.73604e-08	2.24799e-06	NW_006271969.1	-	-	hypNOG12610;sordNOG13276	S	-	hypothetical protein	18163599	-	-	-	-
CCM_07364	654.077	1859	1.50699	3.09301e-08	2.51975e-06	NW_006271974.1	GO:0016021	-	-	-	-	hypothetical protein	18169375	-	GO:0016021//integral component of membrane;	-	-
CCM_01855	1074.2	3078.32	1.51889	5.14952e-08	4.0911e-06	NW_006271969.1	-	-	opiNOG24658;opiNOG29998;sordNOG11607	RZ	sp|P53907|YNO4_YEAST Uncharacterized protein YNL144C OS=Saccharomyces cerevisiae (strain ATCC 204508 / S288c) GN=YNL144C PE=1 SV=1	PH domain containing protein	18163884	-	-	-	-
CCM_03109	5877.33	15776.9	1.42458	6.28798e-08	4.79733e-06	NW_006271970.1	GO:0055114;GO:0004497;GO:0020037;GO:0032259;GO:0016787;GO:0008168;GO:0005506;GO:0016705	-	opiNOG17632	Q	sp|P38364|PID6_FUSSO Pisatin demethylase OS=Fusarium solani subsp. pisi GN=PDA6-1 PE=3 SV=1	cytochrome P450 pisatin demethylase, putative	18165136	GO:0055114//obsolete oxidation-reduction process;GO:0032259//methylation;	-	GO:0004497//monooxygenase activity;GO:0020037//heme binding;GO:0016787//hydrolase activity;GO:0008168//methyltransferase activity;GO:0005506//iron ion binding;GO:0016705//oxidoreductase activity, acting on paired donors, with incorporation or reduction of molecular oxygen;	-
CCM_01408	30948.6	81982.8	1.40545	8.99478e-08	6.75522e-06	NW_006271969.1	GO:0016021	-	opiNOG07896;sordNOG06082	S	-	hypothetical protein	18163439	-	GO:0016021//integral component of membrane;	-	-
CCM_08578	943.416	2537.52	1.42745	9.37054e-08	6.98287e-06	NW_006271975.1	GO:0046872;GO:0004222;GO:0006508	K13726	COG0339;opiNOG14332	EO	sp|P25375|PRTD_YEAST Saccharolysin OS=Saccharomyces cerevisiae (strain ATCC 204508 / S288c) GN=PRD1 PE=1 SV=1	metallopeptidase MepB	18170584	GO:0006508//proteolysis;	-	GO:0046872//metal ion binding;GO:0004222//metalloendopeptidase activity;	-
CCM_04715	1368.06	4420.51	1.69208	1.27058e-07	8.98093e-06	NW_006271971.1	GO:0016811	-	opiNOG20812;onyNOG04405	S	sp|Q9URY7|FMDA_SCHPO Putative formamidase C869.04 OS=Schizosaccharomyces pombe (strain 972 / ATCC 24843) GN=SPAC869.04 PE=3 SV=1	acetamidase/formamidase	18166736	-	-	GO:0016811//hydrolase activity, acting on carbon-nitrogen (but not peptide) bonds, in linear amides;	-
CCM_04656	927.509	2485.58	1.42215	1.33714e-07	9.38246e-06	NW_006271971.1	-	-	opiNOG34400;sordNOG13760	R	-	hypothetical protein	18166678	-	-	-	-
CCM_05599	3074.84	8081.81	1.39417	1.44373e-07	1.00569e-05	NW_006271972.1	GO:0003700;GO:0003677;GO:0016021;GO:0006355	-	opiNOG21500;sordNOG09781	S	sp|Q9C2N1|VIB1_NEUCR Transcription factor vib-1 OS=Neurospora crassa (strain ATCC 24698 / 74-OR23-1A / CBS 708.71 / DSM 1257 / FGSC 987) GN=vib-1 PE=4 SV=1	acid phosphatase phoG-Penicillium chrysogenum	18167617	GO:0006355//regulation of transcription, DNA-templated;	GO:0016021//integral component of membrane;	GO:0003700//DNA-binding transcription factor activity;GO:0003677//DNA binding;	-
CCM_06291	9812.15	25624.3	1.38487	1.47764e-07	1.02191e-05	NW_006271972.1	-	-	sordNOG14584;sordNOG14269;opiNOG45762	R	-	hypothetical protein	18168306	-	-	-	-
CCM_06121	36.6151	148.509	2.02004	3.23126e-07	2.11307e-05	NW_006271972.1	-	-	-	-	-	hypothetical protein	18168136	-	-	-	-
CCM_03719	3196.88	8138.57	1.34811	3.41975e-07	2.22122e-05	NW_006271971.1	-	-	sorNOG02651;sordNOG09251;necNOG11417;hypNOG01013	S	-	hypothetical protein	18165743	-	-	-	-
CCM_01637	4482.29	11322.3	1.33685	4.1649e-07	2.66915e-05	NW_006271969.1	GO:0016021;GO:0055085;GO:0005215	K03457	COG1953;opiNOG23368	FH	sp|Q04895|DAL4_YEAST Allantoin permease OS=Saccharomyces cerevisiae (strain ATCC 204508 / S288c) GN=DAL4 PE=1 SV=1	NCS1 nucleoside transporter family protein	18163667	GO:0055085//transmembrane transport;	GO:0016021//integral component of membrane;	GO:0005215//transporter activity;	-
CCM_09197	5.33034	696.629	7.03002	4.22412e-07	2.68917e-05	NW_006271976.1	-	-	-	-	-	hypothetical protein	18171200	-	-	-	-
CCM_07695	89.4721	286.101	1.67701	4.27992e-07	2.70677e-05	NW_006271974.1	GO:0055114;GO:0016491	-	opiNOG12864;COG1028	IQ	sp|Q9WYG0|Y325_THEMA Uncharacterized oxidoreductase TM_0325 OS=Thermotoga maritima (strain ATCC 43589 / MSB8 / DSM 3109 / JCM 10099) GN=TM_0325 PE=3 SV=1	tropinone reductase, putative	18169705	GO:0055114//obsolete oxidation-reduction process;	-	GO:0016491//oxidoreductase activity;	-
CCM_07693	97.8918	304.892	1.63904	4.85277e-07	3.02637e-05	NW_006271974.1	GO:0051213;GO:0055114	-	opiNOG54889;COG5285	QS	sp|D4AU26|SWNH1_ARTBC Dioxygenase swnH1 OS=Arthroderma benhamiae (strain ATCC MYA-4681 / CBS 112371) GN=swnH1 PE=3 SV=1	phytanoyl-CoA dioxygenase	18169703	GO:0055114//obsolete oxidation-reduction process;	-	GO:0051213//dioxygenase activity;	-
CCM_04757	11633.1	28716	1.30362	5.52408e-07	3.36095e-05	NW_006271971.1	GO:0016787;GO:0005975	-	necNOG09166;opiNOG36578	RS	sp|Q09788|ASL1_SCHPO Alkali-sensitive linkage protein 1 OS=Schizosaccharomyces pombe (strain 972 / ATCC 24843) GN=asl1 PE=1 SV=1	Glycoside hydrolase	18166778	GO:0005975//carbohydrate metabolic process;	-	GO:0016787//hydrolase activity;	-
CCM_06769	1697.35	7214.59	2.08763	6.8052e-07	4.03817e-05	NW_006271973.1	GO:0055114;GO:0004497	-	opiNOG51951	R	sp|D2E9W9|DEP4_ALTBR FAD-dependent monooxygenase DEP4 OS=Alternaria brassicicola GN=DEP4 PE=2 SV=1	dimethylaniline monooxygenase, putative	18168782	GO:0055114//obsolete oxidation-reduction process;	-	GO:0004497//monooxygenase activity;	-
CCM_09616	1122.36	2840.28	1.3395	7.84246e-07	4.59692e-05	NW_006271978.1	-	K09780	sordNOG14226;sorNOG05873	S	sp|A0A0D2YG09|FUB3_FUSO4 Aspartate kinase FUB3 OS=Fusarium oxysporum f. sp. lycopersici (strain 4287 / CBS 123668 / FGSC 9935 / NRRL 34936) GN=FUB3 PE=1 SV=1	Dimeric alpha-beta barrel	18171618	-	-	-	-
CCM_04979	1069	2672.7	1.32203	8.44519e-07	4.92022e-05	NW_006271971.1	GO:0055114;GO:0046872;GO:0004784;GO:0019430	K04564	sordNOG11985	P	sp|Q9Y783|SODM_NEUCR Superoxide dismutase [Mn], mitochondrial OS=Neurospora crassa (strain ATCC 24698 / 74-OR23-1A / CBS 708.71 / DSM 1257 / FGSC 987) GN=sod-2 PE=3 SV=1	superoxide dismutase	18166999	GO:0055114//obsolete oxidation-reduction process;GO:0019430//removal of superoxide radicals;	-	GO:0046872//metal ion binding;GO:0004784//superoxide dismutase activity;	ko05417(Lipid and atherosclerosis);ko05208(Chemical carcinogenesis - reactive oxygen species);ko05016(Huntington disease);ko04213(Longevity regulating pathway - multiple species);ko04212(Longevity regulating pathway - worm);ko04211(Longevity regulating pathway);ko04146(Peroxisome);ko04068(FoxO signaling pathway);ko04013(MAPK signaling pathway - fly)
CCM_09543	161.698	455.642	1.4946	9.21462e-07	5.3042e-05	NW_006271977.1	GO:0055114;GO:0004497	-	opiNOG19837;COG2072	RP	sp|A0R665|ETHA_MYCS2 FAD-containing monooxygenase EthA OS=Mycobacterium smegmatis (strain ATCC 700084 / mc(2)155) GN=ethA PE=3 SV=1	monooxygenase, putative	18171545	GO:0055114//obsolete oxidation-reduction process;	-	GO:0004497//monooxygenase activity;	-
CCM_00871	43789.3	422106	3.26896	1.19449e-06	6.75447e-05	NW_006271969.1	-	-	-	-	-	hypothetical protein	18162905	-	-	-	-
CCM_04293	692.205	1731.84	1.32304	1.28513e-06	7.18252e-05	NW_006271971.1	-	-	opiNOG11155;sordNOG11712	R	sp|Q96CN4|EVI5L_HUMAN EVI5-like protein OS=Homo sapiens GN=EVI5L PE=1 SV=1	RabGAP/TBC	18166316	-	-	-	-
CCM_09512	668.474	1675.04	1.32526	1.3416e-06	7.41194e-05	NW_006271977.1	GO:0016614;GO:0055114;GO:0050660	K17066	opiNOG11247;sordNOG11016;opiNOG13336	R	sp|Q00922|ALOX_CANBO Alcohol oxidase OS=Candida boidinii GN=AOD1 PE=1 SV=1	alcohol dehydrogenase	18171514	GO:0055114//obsolete oxidation-reduction process;	-	GO:0016614//oxidoreductase activity, acting on CH-OH group of donors;GO:0050660//flavin adenine dinucleotide binding;	ko00680(Methane metabolism)
CCM_07510	3279.03	7955.85	1.27875	1.36636e-06	7.46299e-05	NW_006271974.1	GO:0003824;GO:0008152	-	sordNOG07575;opiNOG17163	S	sp|Q9ASR4|BCAL2_ARATH Branched-chain-amino-acid aminotransferase-like protein 2 OS=Arabidopsis thaliana GN=At5g27410 PE=2 SV=1	hypothetical protein	18169521	GO:0008152//metabolic process;	-	GO:0003824//catalytic activity;	-
CCM_08231	72.0653	276.01	1.93735	1.3891e-06	7.54429e-05	NW_006271974.1	GO:0006032;GO:0005975;GO:0004568;GO:0008061	K01183	opiNOG19734;sordNOG05395	G	sp|P09805|KTXA_KLULA Killer toxin subunits alpha/beta OS=Kluyveromyces lactis (strain ATCC 8585 / CBS 2359 / DSM 70799 / NBRC 1267 / NRRL Y-1140 / WM37) PE=1 SV=1	class V chitinase, putative	18170239	GO:0006032//chitin catabolic process;GO:0005975//carbohydrate metabolic process;	-	GO:0004568//chitinase activity;GO:0008061//chitin binding;	ko00520(Amino sugar and nucleotide sugar metabolism)
CCM_06429	1606.67	4693.78	1.54668	1.53146e-06	8.22454e-05	NW_006271973.1	-	-	NOG214940;opiNOG12144;sordNOG12199;pleNOG01446	S	sp|Q99M03|RWD2B_MOUSE RWD domain-containing protein 2B OS=Mus musculus GN=Rwdd2b PE=2 SV=1	DUF1115 domain protein	18168443	-	-	-	-
CCM_06564	1588.24	6017.31	1.92169	1.56184e-06	8.295e-05	NW_006271973.1	-	-	-	-	-	hypothetical protein	18168578	-	-	-	-
CCM_01277	614.992	1536.43	1.32094	1.64767e-06	8.66125e-05	NW_006271969.1	GO:0005509;GO:0004571;GO:0008152;GO:0016021	K01230	sordNOG04420;sorNOG04347;opiNOG23201	G	sp|P39098|MA1A2_MOUSE Mannosyl-oligosaccharide 1,2-alpha-mannosidase IB OS=Mus musculus GN=Man1a2 PE=1 SV=1	class I alpha-mannosidase	18163308	GO:0008152//metabolic process;	GO:0016021//integral component of membrane;	GO:0005509//calcium ion binding;GO:0004571//mannosyl-oligosaccharide 1,2-alpha-mannosidase activity;	ko04141(Protein processing in endoplasmic reticulum);ko00513(Various types of N-glycan biosynthesis);ko00510(N-Glycan biosynthesis)
CCM_05372	10.3337	63.6877	2.62366	1.73819e-06	9.03201e-05	NW_006271972.1	-	-	opiNOG28313;sordNOG04267;opiNOG36993;euroNOG11263	QRS	sp|A0A097ZPD4|ANDH_EMEVA Oxidoreductase andH OS=Emericella variicolor GN=andH PE=1 SV=1	short-chain dehydrogenases/reductase, putative	18167390	-	-	-	-
CCM_06313	1098.35	2655.76	1.27378	1.77917e-06	9.14607e-05	NW_006271972.1	-	-	-	-	-	hypothetical protein	18168327	-	-	-	-
CCM_04462	32.0921	124.595	1.95696	1.85326e-06	9.46711e-05	NW_006271971.1	-	-	-	-	-	hypothetical protein	18166485	-	-	-	-
CCM_04922	1847.48	4431.22	1.26215	2.05525e-06	0.000101318	NW_006271971.1	GO:0016021;GO:0055085	-	opiNOG00469;sordNOG10660	G	sp|Q9P6J0|YHDC_SCHPO Uncharacterized transporter C1683.12 OS=Schizosaccharomyces pombe (strain 972 / ATCC 24843) GN=SPBC1683.12 PE=3 SV=1	Major facilitator superfamily transporter	18166943	GO:0055085//transmembrane transport;	GO:0016021//integral component of membrane;	-	-
CCM_08879	201.342	809.691	2.00773	2.17752e-06	0.000106799	NW_006271975.1	-	-	opiNOG48269;NOG162124	S	-	hypothetical protein	18170884	-	-	-	-
CCM_06957	2285	5455.83	1.25561	2.20524e-06	0.000107609	NW_006271973.1	-	-	-	-	-	hypothetical protein	18168968	-	-	-	-
CCM_04956	1047.91	3499.75	1.73974	2.34766e-06	0.00011284	NW_006271971.1	-	-	opiNOG30910	S	-	hypothetical protein	18166976	-	-	-	-
CCM_03339	226.418	1683.77	2.89464	2.42323e-06	0.000115893	NW_006271970.1	GO:0031177;GO:0016740;GO:0016491;GO:0055114	-	sordNOG04489	I	sp|A0A0D2YG10|FUB1_FUSO4 Reducing polyketide synthase FUB1 OS=Fusarium oxysporum f. sp. lycopersici (strain 4287 / CBS 123668 / FGSC 9935 / NRRL 34936) GN=FUB1 PE=1 SV=2	Beta-ketoacyl synthase	18165365	GO:0055114//obsolete oxidation-reduction process;	-	GO:0031177//phosphopantetheine binding;GO:0016740//transferase activity;GO:0016491//oxidoreductase activity;	-
CCM_07916	48.085	456.963	3.24842	3.02811e-06	0.000142692	NW_006271974.1	GO:0016021	-	opiNOG67856	R	-	hypothetical protein	18169926	-	GO:0016021//integral component of membrane;	-	-
CCM_04849	2222.19	5209.62	1.2292	3.35273e-06	0.000154951	NW_006271971.1	GO:0003676;GO:0046872	-	opiNOG31485	R	sp|B0YDH7|MTFA_ASPFC C2H2 finger domain transcription factor mtfA OS=Neosartorya fumigata (strain CEA10 / CBS 144.89 / FGSC A1163) GN=mtfA PE=4 SV=1	hypothetical protein	18166870	-	-	GO:0003676//nucleic acid binding;GO:0046872//metal ion binding;	-
CCM_03102	539.357	1769.11	1.71371	3.90846e-06	0.000178066	NW_006271970.1	GO:0006788;GO:0004392;GO:0016021	-	sordNOG04513;NOG132479	S	-	hem oxygenase-like, multi-helical	18165129	GO:0006788//heme oxidation;	GO:0016021//integral component of membrane;	GO:0004392//heme oxygenase (decyclizing) activity;	-
CCM_05413	25956.8	60019.7	1.20932	3.95783e-06	0.000179465	NW_006271972.1	-	-	sordNOG04947	R	-	conserved lysine-rich protein, putative	18167431	-	-	-	-
CCM_03272	463.967	1123.32	1.27567	5.14501e-06	0.000221789	NW_006271970.1	GO:0008138;GO:0035335;GO:0004725	-	sordNOG13910;opiNOG39347	V	sp|Q9BY84|DUS16_HUMAN Dual specificity protein phosphatase 16 OS=Homo sapiens GN=DUSP16 PE=1 SV=1	Dual specificity phosphatase	18165298	GO:0035335//peptidyl-tyrosine dephosphorylation;	-	GO:0008138//protein tyrosine/serine/threonine phosphatase activity;GO:0004725//protein tyrosine phosphatase activity;	-
CCM_09193	7876.6	23350.7	1.56782	5.8708e-06	0.000249717	NW_006271976.1	GO:0005634;GO:0051082;GO:0005832;GO:0006457;GO:0005524	K09495	opiNOG02081;sordNOG09218	O	sp|O74341|TCPG_SCHPO T-complex protein 1 subunit gamma OS=Schizosaccharomyces pombe (strain 972 / ATCC 24843) GN=cct3 PE=1 SV=1	T-complex protein 1 subunit gamma	18171196	GO:0006457//protein folding;	GO:0005634//nucleus;GO:0005832//chaperonin-containing T-complex;	GO:0051082//unfolded protein binding;GO:0005524//ATP binding;	-
CCM_08258	190.209	491.295	1.369	5.9702e-06	0.000251065	NW_006271975.1	GO:0055085;GO:0016021	-	sordNOG04807;opiNOG03703	G	sp|A0A089FNE5|PRLL_FUNXX MFS transporter prlL OS=Fungal sp. (strain NRRL 50135) GN=prlL PE=3 SV=1	vitamin H transporter, putative	18170266	GO:0055085//transmembrane transport;	GO:0016021//integral component of membrane;	-	-
CCM_02123	222.656	564.118	1.34118	5.98084e-06	0.000251065	NW_006271970.1	GO:0050662;GO:0003824	-	sordNOG10961;opiNOG03105	R	sp|P35673|GALE_ERWAM UDP-glucose 4-epimerase OS=Erwinia amylovora GN=galE PE=3 SV=1	oxidoreductase	18164151	-	-	GO:0050662//obsolete coenzyme binding;GO:0003824//catalytic activity;	-
CCM_00229	1985.44	4546.12	1.19518	6.06933e-06	0.000253672	NW_006271969.1	-	-	-	-	-	hypothetical protein	18162264	-	-	-	-
CCM_04963	90.5288	257.867	1.51018	6.10375e-06	0.000254006	NW_006271971.1	GO:0016614;GO:0050660;GO:0055114	-	opiNOG17517	R	sp|Q54H55|Y8969_DICDI FAD-linked oxidoreductase DDB_G0289697 OS=Dictyostelium discoideum GN=DDB_G0289697 PE=2 SV=1	FAD linked oxidase domain protein	18166983	GO:0055114//obsolete oxidation-reduction process;	-	GO:0016614//oxidoreductase activity, acting on CH-OH group of donors;GO:0050660//flavin adenine dinucleotide binding;	-
CCM_08644	408.604	980.884	1.26338	6.76547e-06	0.000279127	NW_006271975.1	GO:0055114;GO:0016491	-	opiNOG14952	H	sp|P46882|AOFN_ASPNG Monoamine oxidase N OS=Aspergillus niger GN=maoN PE=1 SV=1	amine oxidase	18170650	GO:0055114//obsolete oxidation-reduction process;	-	GO:0016491//oxidoreductase activity;	-
CCM_04009	903.28	3276.34	1.85884	7.15232e-06	0.000291336	NW_006271971.1	GO:0005975;GO:0016787;GO:0030246	-	opiNOG17689	R	sp|D4ATR3|A7629_ARTBC Uncharacterized secreted glycosidase ARB_07629 OS=Arthroderma benhamiae (strain ATCC MYA-4681 / CBS 112371) GN=ARB_07629 PE=1 SV=1	glycosyl hydrolase, family 92 protein	18166032	GO:0005975//carbohydrate metabolic process;	-	GO:0016787//hydrolase activity;GO:0030246//carbohydrate binding;	-
CCM_04730	1031.78	2377.94	1.20458	7.70058e-06	0.000311032	NW_006271971.1	GO:0050660;GO:0055114;GO:0016614	-	sordNOG05840;opiNOG22621;COG2303	RE	sp|Q9WWW2|ALKJ_PSEPU Alcohol dehydrogenase [acceptor] OS=Pseudomonas putida GN=alkJ PE=3 SV=1	glucose dehydrogenase, putative	18166751	GO:0055114//obsolete oxidation-reduction process;	-	GO:0050660//flavin adenine dinucleotide binding;GO:0016614//oxidoreductase activity, acting on CH-OH group of donors;	-
CCM_00491	444.655	2005.02	2.17286	8.0161e-06	0.000322015	NW_006271969.1	GO:0016310;GO:0030246;GO:0016301;GO:0005975	K07106	opiNOG32786;COG2103	SR	sp|Q9KXT4|MURQ_STRCO N-acetylmuramic acid 6-phosphate etherase OS=Streptomyces coelicolor (strain ATCC BAA-471 / A3(2) / M145) GN=murQ PE=3 SV=1	glucokinase regulator family protein, putative	18162526	GO:0016310//phosphorylation;GO:0005975//carbohydrate metabolic process;	-	GO:0030246//carbohydrate binding;GO:0016301//kinase activity;	ko00520(Amino sugar and nucleotide sugar metabolism)
CCM_09385	339.7	862.374	1.34405	9.00414e-06	0.000357673	NW_006271977.1	GO:0046872	K14816	sorNOG08206;necNOG09941	R	sp|Q9HET8|TRI15_FUSSP Core trichothecene cluster (CTC) protein 15 OS=Fusarium sporotrichioides GN=TRI15 PE=2 SV=1	pre-60S factor REI1, putative	18171388	-	-	GO:0046872//metal ion binding;	-
CCM_07897	4818	12067	1.32456	9.23273e-06	0.000365244	NW_006271974.1	GO:0035556;GO:0034644;GO:0004871;GO:0016042;GO:0005829;GO:0004435	K05857	opiNOG00706;sordNOG08883	I	sp|P40977|PLC1_SCHPO 1-phosphatidylinositol 4,5-bisphosphate phosphodiesterase 1 OS=Schizosaccharomyces pombe (strain 972 / ATCC 24843) GN=plc1 PE=1 SV=1	PLC-like phosphodiesterase	18169907	GO:0035556//intracellular signal transduction;GO:0034644//cellular response to UV;GO:0016042//lipid catabolic process;	GO:0005829//cytosol;	GO:0004871//obsolete signal transducer activity;GO:0004435//phosphatidylinositol phospholipase C activity;	ko05131(Shigellosis);ko04933(AGE-RAGE signaling pathway in diabetic complications);ko04919(Thyroid hormone signaling pathway);ko04070(Phosphatidylinositol signaling system);ko04020(Calcium signaling pathway);ko00562(Inositol phosphate metabolism)
CCM_02068	5358.99	12013.1	1.16458	9.48735e-06	0.000373778	NW_006271970.1	GO:0005829;GO:1902716;GO:0010971;GO:0030042;GO:0032153;GO:0070317;GO:0005524;GO:0042149;GO:0004674;GO:0018107;GO:0042993;GO:0051519;GO:0030428	K21157	sordNOG07602	T	sp|P50526|SSP1_SCHPO Serine/threonine-protein kinase ssp1 OS=Schizosaccharomyces pombe (strain 972 / ATCC 24843) GN=ssp1 PE=1 SV=1	serine/threonine protein kinase, putative	18164097	GO:0010971//positive regulation of G2/M transition of mitotic cell cycle;GO:0030042//actin filament depolymerization;GO:0070317//negative regulation of G0 to G1 transition;GO:0042149//cellular response to glucose starvation;GO:0018107//peptidyl-threonine phosphorylation;GO:0042993//obsolete positive regulation of transcription factor import into nucleus;GO:0051519//activation of bipolar cell grow…	GO:0005829//cytosol;GO:1902716//cell cortex of growing cell tip;GO:0032153//cell division site;GO:0030428//cell septum;	GO:0005524//ATP binding;GO:0004674//protein serine/threonine kinase activity;	ko04138(Autophagy - yeast)
CCM_01157	419.047	1059.24	1.33785	1.06221e-05	0.000415083	NW_006271969.1	-	-	hypNOG14296;necNOG14195	S	-	hypothetical protein	18163189	-	-	-	-
CCM_08640	327.462	787.517	1.26598	1.10591e-05	0.000430408	NW_006271975.1	GO:0016787;GO:0008152;GO:0016021	-	sordNOG14086;opiNOG58066;opiNOG35572	R	-	hypothetical protein	18170646	GO:0008152//metabolic process;	GO:0016021//integral component of membrane;	GO:0016787//hydrolase activity;	-
CCM_06362	24.9516	110.502	2.14686	1.36185e-05	0.000513391	NW_006271972.1	GO:0000981;GO:0005634;GO:0006357;GO:0008270	-	opiNOG70699;opiNOG03965	S	-	Fungal transcriptional regulatory protein	18168376	GO:0006357//regulation of transcription by RNA polymerase II;	GO:0005634//nucleus;	GO:0000981//DNA-binding transcription factor activity, RNA polymerase II-specific;GO:0008270//zinc ion binding;	-
CCM_05635	2241.63	7912.45	1.81957	1.39334e-05	0.000519248	NW_006271972.1	-	-	opiNOG59742;sordNOG14294	S	-	hypothetical protein	18167653	-	-	-	-
CCM_09429	1697.14	4158.39	1.29292	1.39359e-05	0.000519248	NW_006271977.1	-	-	sordNOG11657;opiNOG11251	T	sp|O77775|NCF2_BOVIN Neutrophil cytosol factor 2 OS=Bos taurus GN=NCF2 PE=2 SV=1	PB1 domain protein, putative	18171432	-	-	-	-
CCM_07152	496.307	1138.05	1.19726	1.4079e-05	0.000522554	NW_006271973.1	GO:0006468;GO:0004672;GO:0005524	-	hypNOG11314;opiNOG60669;opiNOG66313;sordNOG14195	T	sp|P38147|CHK1_YEAST Serine/threonine-protein kinase CHK1 OS=Saccharomyces cerevisiae (strain ATCC 204508 / S288c) GN=CHK1 PE=1 SV=1	Protein kinase-like domain	18169163	GO:0006468//protein phosphorylation;	-	GO:0004672//protein kinase activity;GO:0005524//ATP binding;	-
CCM_00186	31.1344	110.082	1.822	1.58032e-05	0.000575442	NW_006271969.1	GO:0016021;GO:0022891;GO:0055085;GO:0008643	-	opiNOG50298;opiNOG56052;hypNOG08838	R	sp|P15325|QUTD_EMENI Quinate permease OS=Emericella nidulans (strain FGSC A4 / ATCC 38163 / CBS 112.46 / NRRL 194 / M139) GN=qutD PE=1 SV=2	sugar transporter, putative	18162221	GO:0055085//transmembrane transport;GO:0008643//carbohydrate transport;	GO:0016021//integral component of membrane;	-	-
CCM_06129	700.893	2095.78	1.58022	1.65243e-05	0.000597172	NW_006271972.1	-	-	sordNOG15467;opiNOG50788;sordNOG08522	RS	-	hypothetical protein	18168144	-	-	-	-
CCM_08329	7691.09	16762.2	1.12395	1.9464e-05	0.000692991	NW_006271975.1	-	-	hypNOG00968;sordNOG09021;opiNOG23875	S	-	BTB/POZ fold domain containing protein	18170337	-	-	-	-
CCM_08604	72.7008	543.16	2.90133	2.11828e-05	0.000748639	NW_006271975.1	GO:0020037;GO:0005506;GO:0016705;GO:0055114;GO:0016021;GO:0004497	K07824	COG2124;sordNOG04535	Q	sp|P17549|CP53_ASPNG Benzoate 4-monooxygenase OS=Aspergillus niger GN=bphA PE=1 SV=1	cytochrome P450 3A3	18170610	GO:0055114//obsolete oxidation-reduction process;	GO:0016021//integral component of membrane;	GO:0020037//heme binding;GO:0005506//iron ion binding;GO:0016705//oxidoreductase activity, acting on paired donors, with incorporation or reduction of molecular oxygen;GO:0004497//monooxygenase activity;	ko00627(Aminobenzoate degradation);ko00362(Benzoate degradation)
CCM_01895	829.09	1851.51	1.1591	2.23826e-05	0.000784385	NW_006271969.1	GO:0016787;GO:0016491;GO:0055114;GO:0010181	K01049	opiNOG59107;sordNOG10938	T	sp|Q29499|ACES_RABIT Acetylcholinesterase (Fragment) OS=Oryctolagus cuniculus GN=ACHE PE=2 SV=1	para-nitrobenzyl esterase	18163924	GO:0055114//obsolete oxidation-reduction process;	-	GO:0016787//hydrolase activity;GO:0016491//oxidoreductase activity;GO:0010181//FMN binding;	ko04725(Cholinergic synapse);ko00564(Glycerophospholipid metabolism)
CCM_04348	142.058	610.145	2.10267	2.25206e-05	0.000784385	NW_006271971.1	GO:0016021	-	-	-	-	putative membrane protein	18166371	-	GO:0016021//integral component of membrane;	-	-
CCM_06948	6303.27	13590.1	1.10838	2.35941e-05	0.000812939	NW_006271973.1	GO:0005829	-	sordNOG08105	R	sp|Q9Y7K5|YGI3_SCHPO Uncharacterized WD repeat-containing protein C2A9.03 OS=Schizosaccharomyces pombe (strain 972 / ATCC 24843) GN=SPBC2A9.03 PE=4 SV=2	WD domain containing protein	18168959	-	GO:0005829//cytosol;	-	-
CCM_02411	330.353	763.472	1.20857	2.40533e-05	0.000825803	NW_006271970.1	GO:0016740	K00799	NOG13732;opiNOG23309	O	-	glutathione S-transferase family protein, putative	18164438	-	-	GO:0016740//transferase activity;	ko05418(Fluid shear stress and atherosclerosis);ko05225(Hepatocellular carcinoma);ko05208(Chemical carcinogenesis - reactive oxygen species);ko05207(Chemical carcinogenesis - receptor activation);ko05204(Chemical carcinogenesis - DNA adducts);ko05200(Pathways in cancer);ko04212(Longevity regulating pathway - worm);ko01524(Platinum drug resistance);ko00983(Drug metabolism - other enzymes);ko00982(…
CCM_08629	3.99662	36.0417	3.17282	2.49279e-05	0.00084976	NW_006271975.1	GO:0016021	-	eurotNOG12799	S	-	hypothetical protein	18170635	-	GO:0016021//integral component of membrane;	-	-
CCM_03718	1020.41	2235.92	1.13172	2.73772e-05	0.000910648	NW_006271971.1	GO:0009082;GO:0004160	K01687	sordNOG09912	E	sp|Q10318|ILV3_SCHPO Putative dihydroxy-acid dehydratase, mitochondrial OS=Schizosaccharomyces pombe (strain 972 / ATCC 24843) GN=SPAC17G8.06c PE=2 SV=1	dihydroxy-acid dehydratase, putative	18165742	GO:0009082//branched-chain amino acid biosynthetic process;	-	GO:0004160//dihydroxy-acid dehydratase activity;	ko00770(Pantothenate and CoA biosynthesis);ko00290(Valine, leucine and isoleucine biosynthesis)
CCM_04058	2867.16	6161.5	1.10366	2.79458e-05	0.000926357	NW_006271971.1	-	-	sordNOG11514;opiNOG11964;opiNOG70638	S	-	hypothetical protein	18166081	-	-	-	-
CCM_00780	1359.31	5869.52	2.11037	3.02213e-05	0.000994605	NW_006271969.1	GO:0006508;GO:0016021;GO:0004190	-	opiNOG49046;NOG132913	OS	sp|C4YMJ3|CARP2_CANAW Candidapepsin-2 OS=Candida albicans (strain WO-1) GN=SAP2 PE=1 SV=1	candidapepsin-4 precursor	18162814	GO:0006508//proteolysis;	GO:0016021//integral component of membrane;	GO:0004190//aspartic-type endopeptidase activity;	-
CCM_01988	77.3338	263.226	1.76713	3.22843e-05	0.00104495	NW_006271970.1	-	-	-	-	-	hypothetical protein	18164017	-	-	-	-
CCM_05487	188.042	631.146	1.74692	3.27868e-05	0.00105411	NW_006271972.1	-	-	hypNOG14153;sordNOG15248	S	-	hypothetical protein	18167505	-	-	-	-
CCM_03273	88.0605	236.492	1.42522	3.31162e-05	0.00106115	NW_006271970.1	-	-	-	-	-	hypothetical protein	18165299	-	-	-	-
CCM_01530	5342.91	17352.9	1.69948	3.35379e-05	0.0010711	NW_006271969.1	GO:0005506;GO:0020037;GO:0016705;GO:0016020;GO:0055114;GO:0004497	-	opiNOG06557;opiNOG55464	Q	sp|Q4WAZ6|FMAG_ASPFU Multifunctional cytochrome P450 monooxygenase af510 OS=Neosartorya fumigata (strain ATCC MYA-4609 / Af293 / CBS 101355 / FGSC A1100) GN=af510 PE=1 SV=1	cytochrome P450 oxidoreductase OrdA-like protein	18163561	GO:0055114//obsolete oxidation-reduction process;	GO:0016020//membrane;	GO:0005506//iron ion binding;GO:0020037//heme binding;GO:0016705//oxidoreductase activity, acting on paired donors, with incorporation or reduction of molecular oxygen;GO:0004497//monooxygenase activity;	-
CCM_01554	2949.6	6271.63	1.08832	3.37837e-05	0.00107537	NW_006271969.1	GO:0016021;GO:0023014;GO:0000155;GO:0005622;GO:0000160	K19691	sordNOG08129	T	sp|Q5A599|NIK1_CANAL Histidine protein kinase NIK1 OS=Candida albicans (strain SC5314 / ATCC MYA-2876) GN=NIK1 PE=1 SV=3	two-component osmosensing histidine kinase (Bos1)	18163585	GO:0000160//phosphorelay signal transduction system;	GO:0016021//integral component of membrane;GO:0005622//intracellular anatomical structure;	GO:0000155//phosphorelay sensor kinase activity;	ko02020(Two-component system)
CCM_04598	2117.61	4537.28	1.09939	3.56918e-05	0.00112864	NW_006271971.1	GO:0032259;GO:0051213;GO:0008168;GO:0055114	-	opiNOG18687;sordNOG06563	SR	-	phytanoyl-CoA dioxygenase family protein	18166621	GO:0032259//methylation;GO:0055114//obsolete oxidation-reduction process;	-	GO:0051213//dioxygenase activity;GO:0008168//methyltransferase activity;	-
CCM_00438	1573.8	3364.17	1.09599	3.64751e-05	0.00114962	NW_006271969.1	GO:0019781;GO:0005829;GO:0045116;GO:0005634	K04532	sordNOG09740	O	sp|Q9Z1A5|ULA1_RAT NEDD8-activating enzyme E1 regulatory subunit OS=Rattus norvegicus GN=Nae1 PE=1 SV=1	ubiquitin-like activating enzyme (UlaA)	18162473	GO:0045116//protein neddylation;	GO:0005829//cytosol;GO:0005634//nucleus;	GO:0019781//NEDD8 activating enzyme activity;	ko05010(Alzheimer disease)
CCM_04971	483.763	1145.91	1.24413	3.6604e-05	0.00114992	NW_006271971.1	GO:0016021;GO:0004497;GO:0055114;GO:0016705;GO:0020037;GO:0005506	-	opiNOG02460;sordNOG11192	Q	sp|W7LC91|FUM15_GIBM7 Cytochrome P450 monooxygenase FUM15 OS=Gibberella moniliformis (strain M3125 / FGSC 7600) GN=FUM15 PE=3 SV=1	cytochrome P450 78A3	18166991	GO:0055114//obsolete oxidation-reduction process;	GO:0016021//integral component of membrane;	GO:0004497//monooxygenase activity;GO:0016705//oxidoreductase activity, acting on paired donors, with incorporation or reduction of molecular oxygen;GO:0020037//heme binding;GO:0005506//iron ion binding;	-
CCM_02083	180.027	790.829	2.13515	3.69438e-05	0.00115681	NW_006271970.1	GO:0008643;GO:0055085;GO:0016021;GO:0022857	-	euroNOG07712;opiNOG01156;sordNOG05363	R	sp|P0CD99|MPH2_YEAST Alpha-glucosides permease MPH2 OS=Saccharomyces cerevisiae (strain ATCC 204508 / S288c) GN=MPH2 PE=2 SV=1	sugar transporter, putative	18164112	GO:0008643//carbohydrate transport;GO:0055085//transmembrane transport;	GO:0016021//integral component of membrane;	GO:0022857//transmembrane transporter activity;	-
CCM_03337	1466.6	3138.87	1.09777	4.02765e-05	0.00124498	NW_006271970.1	-	-	sordNOG14228	S	-	stress responsive A/B barrel domain protein	18165363	-	-	-	-
CCM_02781	2998.58	6318.28	1.07525	4.08714e-05	0.00125928	NW_006271970.1	GO:0005524;GO:0004674;GO:0006468	K08287	sordNOG07931	T	sp|Q10156|LKH1_SCHPO Dual specificity protein kinase lkh1 OS=Schizosaccharomyces pombe (strain 972 / ATCC 24843) GN=lkh1 PE=1 SV=3	protein kinase (Lkh1)	18164808	GO:0006468//protein phosphorylation;	-	GO:0005524//ATP binding;GO:0004674//protein serine/threonine kinase activity;	-
CCM_05608	2612.8	5539.35	1.08412	4.15385e-05	0.00126765	NW_006271972.1	GO:0008270;GO:0006357;GO:0005634;GO:0000981	-	sordNOG07567;opiNOG08760	S	sp|O60056|YG55_SCHPO Uncharacterized transcriptional regulatory protein C56F2.05c OS=Schizosaccharomyces pombe (strain 972 / ATCC 24843) GN=SPBC56F2.05c PE=3 SV=1	C6 finger domain protein, putative	18167626	GO:0006357//regulation of transcription by RNA polymerase II;	GO:0005634//nucleus;	GO:0008270//zinc ion binding;GO:0000981//DNA-binding transcription factor activity, RNA polymerase II-specific;	-
CCM_08210	1128.14	2411.1	1.09575	4.3878e-05	0.00132641	NW_006271974.1	GO:0005634;GO:0000981;GO:0006357;GO:0003677;GO:0008270	-	sordNOG05010;necNOG07179;opiNOG22689	KS	sp|O14130|YF54_SCHPO Uncharacterized transcriptional regulatory protein C3C7.04 OS=Schizosaccharomyces pombe (strain 972 / ATCC 24843) GN=SPAC3C7.04 PE=3 SV=1	Fungal specific transcription factor	18170218	GO:0006357//regulation of transcription by RNA polymerase II;	GO:0005634//nucleus;	GO:0000981//DNA-binding transcription factor activity, RNA polymerase II-specific;GO:0003677//DNA binding;GO:0008270//zinc ion binding;	-
CCM_08058	1594.78	3373.74	1.08099	4.63418e-05	0.0013878	NW_006271974.1	-	-	opiNOG63145	S	-	hypothetical protein	18170067	-	-	-	-
CCM_05969	479.495	1049.82	1.13056	4.93541e-05	0.00145801	NW_006271972.1	-	-	opiNOG60690;hypNOG12982;necNOG06332	S	-	hypothetical protein	18167987	-	-	-	-
CCM_05609	84.4136	219.411	1.37809	5.22679e-05	0.00152721	NW_006271972.1	-	-	-	-	-	hypothetical protein	18167627	-	-	-	-
CCM_01955	1392.88	22736.9	4.02889	5.34567e-05	0.0015525	NW_006271970.1	-	-	opiNOG64098	S	-	hypothetical protein	18163984	-	-	-	-
CCM_06104	813.256	1743.59	1.10028	5.42026e-05	0.00156943	NW_006271972.1	GO:0016614;GO:0050660;GO:0055114;GO:0016021	-	opiNOG22097;opiNOG30889	R	sp|D4B1P2|A2372_ARTBC Uncharacterized FAD-linked oxidoreductase ARB_02372 OS=Arthroderma benhamiae (strain ATCC MYA-4681 / CBS 112371) GN=ARB_02372 PE=1 SV=1	FAD-binding, type 2	18168119	GO:0055114//obsolete oxidation-reduction process;	GO:0016021//integral component of membrane;	GO:0016614//oxidoreductase activity, acting on CH-OH group of donors;GO:0050660//flavin adenine dinucleotide binding;	-
CCM_00452	536.136	1161.55	1.11538	5.77444e-05	0.00166197	NW_006271969.1	GO:0016620;GO:0055114	-	pleNOG07672;COG1012;opiNOG22814	C	sp|P00352|AL1A1_HUMAN Retinal dehydrogenase 1 OS=Homo sapiens GN=ALDH1A1 PE=1 SV=2	aldehyde dehydrogenase X	18162487	GO:0055114//obsolete oxidation-reduction process;	-	GO:0016620//oxidoreductase activity, acting on the aldehyde or oxo group of donors, NAD or NADP as acceptor;	-
CCM_07015	2061.37	4346.32	1.07619	5.88525e-05	0.00168811	NW_006271973.1	GO:0016021	-	necNOG08083;hypNOG02414;sorNOG04947	S	-	hypothetical protein	18169026	-	GO:0016021//integral component of membrane;	-	-
CCM_08479	172.228	492.73	1.51648	5.90039e-05	0.00168811	NW_006271975.1	-	-	opiNOG42592	R	-	muramidase, putative	18170486	-	-	-	-
CCM_04731	152.135	720.923	2.2445	6.1197e-05	0.00174049	NW_006271971.1	GO:0016021	-	opiNOG26814;opiNOG60362	S	-	integral membrane protein, putative	18166752	-	GO:0016021//integral component of membrane;	-	-
CCM_07591	76.7484	1741.34	4.50392	6.33577e-05	0.00179135	NW_006271974.1	GO:0071577;GO:0005385;GO:0016021	K14709	opiNOG18859;sordNOG07705	P	sp|Q12436|ZRT2_YEAST Zinc-regulated transporter 2 OS=Saccharomyces cerevisiae (strain ATCC 204508 / S288c) GN=ZRT2 PE=1 SV=1	Fe(2+) transport protein 3	18169602	GO:0071577//zinc ion transmembrane transport;	GO:0016021//integral component of membrane;	GO:0005385//zinc ion transmembrane transporter activity;	ko05012(Parkinson disease);ko05010(Alzheimer disease)
CCM_09288	1295.09	2710.81	1.06567	6.37762e-05	0.00179789	NW_006271976.1	GO:0008270;GO:0003677;GO:0006357;GO:0000981;GO:0005634	-	opiNOG32421;opiNOG48954	S	sp|P07272|PPR1_YEAST Pyrimidine pathway regulatory protein 1 OS=Saccharomyces cerevisiae (strain ATCC 204508 / S288c) GN=PPR1 PE=1 SV=1	fungal specific transcription factor, putative	18171291	GO:0006357//regulation of transcription by RNA polymerase II;	GO:0005634//nucleus;	GO:0008270//zinc ion binding;GO:0003677//DNA binding;GO:0000981//DNA-binding transcription factor activity, RNA polymerase II-specific;	-
CCM_08042	451.03	1144.54	1.34347	7.10755e-05	0.00196902	NW_006271974.1	GO:0016021	-	necNOG07757;hypNOG05306	S	-	hypothetical protein	18170051	-	GO:0016021//integral component of membrane;	-	-
CCM_08721	2694.15	5568.15	1.04737	7.26744e-05	0.00200753	NW_006271975.1	GO:0008270;GO:0016491;GO:0055114	-	COG1062;opiNOG21203	QC	sp|P39849|XYLB_PSEPU Aryl-alcohol dehydrogenase OS=Pseudomonas putida GN=xylB PE=1 SV=1	alcohol dehydrogenase, putative	18170727	GO:0055114//obsolete oxidation-reduction process;	-	GO:0008270//zinc ion binding;GO:0016491//oxidoreductase activity;	-
CCM_08107	608.175	1290.56	1.08544	7.80339e-05	0.00212504	NW_006271974.1	-	-	opiNOG09041	S	-	hypothetical protein	18170116	-	-	-	-
CCM_08330	4641.6	9491.67	1.03204	7.91723e-05	0.00214995	NW_006271975.1	GO:0016021;GO:0055085	-	opiNOG07106	R	sp|Q870L2|MIRB_EMENI Siderophore iron transporter mirB OS=Emericella nidulans (strain FGSC A4 / ATCC 38163 / CBS 112.46 / NRRL 194 / M139) GN=mirB PE=3 SV=1	siderophore iron transporter mirB	18170338	GO:0055085//transmembrane transport;	GO:0016021//integral component of membrane;	-	-
CCM_03291	1126.3	2355	1.06414	8.12303e-05	0.00219743	NW_006271970.1	GO:0005375;GO:0035434;GO:0016021	-	sordNOG12416	S	-	Ctr copper transporter	18165317	GO:0035434//copper ion transmembrane transport;	GO:0016021//integral component of membrane;	GO:0005375//copper ion transmembrane transporter activity;	-
CCM_04904	336.259	734.407	1.12701	8.40264e-05	0.00224999	NW_006271971.1	GO:0046872	-	sordNOG13158	R	-	hypothetical protein	18166925	-	-	GO:0046872//metal ion binding;	-
CCM_01575	46.216	134.354	1.53957	8.61508e-05	0.00229409	NW_006271969.1	GO:0016787;GO:0008152	-	opiNOG36157	R	sp|B6H2E9|CUTI2_PENRW Probable cutinase 2 OS=Penicillium rubens (strain ATCC 28089 / DSM 1075 / NRRL 1951 / Wisconsin 54-1255) GN=Pc13g05110 PE=3 SV=1	Cutinase	18163606	GO:0008152//metabolic process;	-	GO:0016787//hydrolase activity;	-
CCM_07630	344.389	776.305	1.17258	8.86891e-05	0.00235516	NW_006271974.1	GO:0001676;GO:0016021;GO:0004467;GO:0006633	-	sorNOG00579;opiNOG00113;sordNOG08727	I	sp|O42633|FAT1_COCHE Fatty acid transporter protein OS=Cochliobolus heterostrophus GN=FAT1 PE=3 SV=1	long-chain fatty acid transporter	18169641	GO:0001676//long-chain fatty acid metabolic process;GO:0006633//fatty acid biosynthetic process;	GO:0016021//integral component of membrane;	GO:0004467//long-chain fatty acid-CoA ligase activity;	-
CCM_07380	671.513	1403.67	1.06372	9.58326e-05	0.00251705	NW_006271974.1	GO:0044763;GO:0050794;GO:0044424;GO:0019901	K09554	sorNOG03667;opiNOG00188;KOG2260;sordNOG10473	D	sp|O94740|CDC37_SCHPO Hsp90 co-chaperone Cdc37 OS=Schizosaccharomyces pombe (strain 972 / ATCC 24843) GN=cdc37 PE=1 SV=1	Hsp90 co-chaperone Cdc37	18169391	GO:0050794//regulation of cellular process;	GO:0044424//obsolete intracellular part;	GO:0019901//protein kinase binding;	ko04151(PI3K-Akt signaling pathway)
CCM_07746	113.905	273.918	1.26592	9.73988e-05	0.00254428	NW_006271974.1	-	-	sorNOG08193;opiNOG05166	RS	-	hypothetical protein	18169756	-	-	-	-
CCM_02291	145.653	353.161	1.2778	0.000103328	0.0026685	NW_006271970.1	-	-	necNOG10642;hypNOG13332;sordNOG13640	S	-	hypothetical protein	18164318	-	-	-	-
CCM_01060	1457.81	3092.91	1.08516	0.000114721	0.0029175	NW_006271969.1	-	-	sordNOG15208;sordNOG15333	S	-	hypothetical protein	18163093	-	-	-	-
CCM_08645	217.398	481.42	1.14696	0.000115399	0.00292701	NW_006271975.1	GO:0016491;GO:0055114	-	opiNOG53342	Q	sp|G0RNA2|LXR4_HYPJQ L-xylo-3-hexulose reductase OS=Hypocrea jecorina (strain QM6a) GN=lxr4 PE=1 SV=1	short-chain dehydrogenase, putative	18170651	GO:0055114//obsolete oxidation-reduction process;	-	GO:0016491//oxidoreductase activity;	-
CCM_07051	619.06	1291.19	1.06055	0.000115738	0.00292786	NW_006271973.1	-	-	hypNOG02022;sordNOG12942	S	-	beta-xylosidase	18169062	-	-	-	-
CCM_08841	546.198	1143.46	1.06591	0.000119626	0.00301038	NW_006271975.1	-	-	opiNOG47637	S	-	hypothetical protein	18170846	-	-	-	-
CCM_04482	33.881	466.507	3.78335	0.00012997	0.0032201	NW_006271971.1	-	-	hypNOG12288;opiNOG36377;sordNOG13187	S	-	hypothetical protein	18166505	-	-	-	-
CCM_02334	34.9438	106.655	1.60984	0.000130804	0.00322414	NW_006271970.1	-	-	opiNOG15535;sordNOG11112	S	sp|Q0VCN1|NMRL1_BOVIN NmrA-like family domain-containing protein 1 OS=Bos taurus GN=NMRAL1 PE=2 SV=1	NmrA family protein	18164361	-	-	-	-
CCM_04234	982.036	3572.01	1.86289	0.000132989	0.00326962	NW_006271971.1	-	-	sordNOG04723;hypNOG00402	SR	-	hypothetical protein	18166257	-	-	-	-
CCM_03286	981.347	2011.24	1.03525	0.000134997	0.00330211	NW_006271970.1	GO:0016491;GO:0055114	-	opiNOG06138;treNOG07219	R	sp|O34371|YTET_BACSU Putative oxidoreductase YteT OS=Bacillus subtilis (strain 168) GN=yteT PE=2 SV=1	streptomycin biosynthesis protein StrI	18165312	GO:0055114//obsolete oxidation-reduction process;	-	GO:0016491//oxidoreductase activity;	-
CCM_04420	50.0402	137.9	1.46246	0.000137419	0.00334433	NW_006271971.1	GO:0008152;GO:0016787	-	opiNOG28534;pleNOG03931	R	sp|Q01109|BAH_STRHY Acetyl-hydrolase OS=Streptomyces hygroscopicus GN=bah PE=3 SV=3	alpha/beta hydrolase fold-3 domain containing protein	18166443	GO:0008152//metabolic process;	-	GO:0016787//hydrolase activity;	-
CCM_04595	664.135	1372.28	1.04703	0.000148496	0.00359569	NW_006271971.1	-	-	-	-	-	hypothetical protein	18166618	-	-	-	-
CCM_08317	975.456	1976.11	1.01852	0.000160421	0.00385531	NW_006271975.1	GO:0055114;GO:0016021;GO:0005215;GO:0055085;GO:0018580	K20989	sordNOG08832	E	sp|O94469|DUR31_SCHPO Probable urea active transporter 1 OS=Schizosaccharomyces pombe (strain 972 / ATCC 24843) GN=dur3-1 PE=3 SV=1	urea active transporter, putative	18170325	GO:0055114//obsolete oxidation-reduction process;GO:0055085//transmembrane transport;	GO:0016021//integral component of membrane;	GO:0005215//transporter activity;GO:0018580//nitronate monooxygenase activity;	-
CCM_01867	119.375	275.625	1.20721	0.000164	0.00391199	NW_006271969.1	GO:0016310;GO:0016301	-	sordNOG04540;opiNOG18280;necNOG10373	RS	-	Protein kinase-like domain	18163896	GO:0016310//phosphorylation;	-	GO:0016301//kinase activity;	-
CCM_09108	1236.24	2733.46	1.14477	0.000169202	0.00401615	NW_006271976.1	GO:0016491;GO:0055114	-	sordNOG10394	R	-	FAD dependent oxidoreductase, putative	18171111	GO:0055114//obsolete oxidation-reduction process;	-	GO:0016491//oxidoreductase activity;	-
CCM_06451	81.9035	200.209	1.28951	0.0001753	0.00411591	NW_006271973.1	GO:0016021	-	opiNOG30123	S	-	tubulin, putative	18168465	-	GO:0016021//integral component of membrane;	-	-
CCM_00453	601.671	1229.38	1.03089	0.000180671	0.0042155	NW_006271969.1	GO:0000981;GO:0005634;GO:0006357;GO:0003677;GO:0008270	-	opiNOG32421	S	sp|Q9P6I9|YHDD_SCHPO Uncharacterized transcriptional regulatory protein C1683.13c OS=Schizosaccharomyces pombe (strain 972 / ATCC 24843) GN=SPBC1683.13c PE=1 SV=1	C6 transcription factor (UaY), putative	18162488	GO:0006357//regulation of transcription by RNA polymerase II;	GO:0005634//nucleus;	GO:0000981//DNA-binding transcription factor activity, RNA polymerase II-specific;GO:0003677//DNA binding;GO:0008270//zinc ion binding;	-
CCM_00705	929.211	1886.56	1.02168	0.000182727	0.00425315	NW_006271969.1	GO:0016746;GO:0016787	-	opiNOG25371;sorNOG07975	R	sp|Q76KX0|LAAA_PSEAZ L-amino acid amidase OS=Pseudomonas azotoformans GN=laaA PE=1 SV=1	hydrolases or acyltransferases (alpha/beta hydrolase superfamily)	18162739	-	-	GO:0016746//acyltransferase activity;GO:0016787//hydrolase activity;	-
CCM_04153	69.4029	174.36	1.329	0.000191716	0.00441861	NW_006271971.1	GO:0003677;GO:0006357;GO:0008270;GO:0000981;GO:0005634	-	euNOG10438;eurotNOG00107;opiNOG05442	K	-	C6 transcription factor, putative	18166176	GO:0006357//regulation of transcription by RNA polymerase II;	GO:0005634//nucleus;	GO:0003677//DNA binding;GO:0008270//zinc ion binding;GO:0000981//DNA-binding transcription factor activity, RNA polymerase II-specific;	-
CCM_08780	243.422	553.993	1.18641	0.000193512	0.00443968	NW_006271975.1	GO:0005975;GO:0008061;GO:0016810	-	sordNOG09104;opiNOG05895	R	sp|D4AM78|CDA_ARTBC Chitin deacetylase ARB_04768 OS=Arthroderma benhamiae (strain ATCC MYA-4681 / CBS 112371) GN=ARB_04768 PE=3 SV=1	chitin deacetylase, putative	18170785	GO:0005975//carbohydrate metabolic process;	-	GO:0008061//chitin binding;GO:0016810//hydrolase activity, acting on carbon-nitrogen (but not peptide) bonds;	-
CCM_00084	148.523	333.337	1.16629	0.000199372	0.00456324	NW_006271969.1	-	-	-	-	-	hypothetical protein	18162119	-	-	-	-
CCM_09344	233.941	498.831	1.0924	0.000202703	0.0046175	NW_006271977.1	GO:0004497;GO:0016021;GO:0055114;GO:0016705;GO:0020037;GO:0005506	-	opiNOG08814;opiNOG02188;COG2124	Q	sp|Q9Y757|CP52L_DEBHN Cytochrome P450 52A12 OS=Debaryomyces hansenii GN=CYP52A12 PE=2 SV=2	cytochrome P450 family protein, putative	18171347	GO:0055114//obsolete oxidation-reduction process;	GO:0016021//integral component of membrane;	GO:0004497//monooxygenase activity;GO:0016705//oxidoreductase activity, acting on paired donors, with incorporation or reduction of molecular oxygen;GO:0020037//heme binding;GO:0005506//iron ion binding;	-
CCM_08425	191.309	416.297	1.12171	0.000204666	0.0046512	NW_006271975.1	GO:0016787	-	opiNOG23930;opiNOG34357;sorNOG00330	RS	sp|Q6JQN1|ACD10_HUMAN Acyl-CoA dehydrogenase family member 10 OS=Homo sapiens GN=ACAD10 PE=1 SV=1	epoxide hydrolase, putative	18170433	-	-	GO:0016787//hydrolase activity;	-
CCM_08213	172.77	378.922	1.13305	0.000207532	0.00470521	NW_006271974.1	GO:0016740	-	sordNOG10776	I	sp|A9WC39|SMTB_CHLAA Succinyl-CoA--L-malate CoA-transferase beta subunit OS=Chloroflexus aurantiacus (strain ATCC 29366 / DSM 635 / J-10-fl) GN=smtB PE=3 SV=1	CAIB/BAIF family enzyme	18170221	-	-	GO:0016740//transferase activity;	-
CCM_01541	24.2525	79.83	1.7188	0.000227269	0.00511649	NW_006271969.1	-	-	sordNOG13676	R	-	hypothetical protein	18163572	-	-	-	-
CCM_00793	44.8134	556.791	3.63513	0.000233631	0.00524741	NW_006271969.1	-	-	arthNOG12677	R	-	hypothetical protein	18162827	-	-	-	-
CCM_09534	434.947	879.742	1.01624	0.000235032	0.00526657	NW_006271977.1	GO:0016021	-	sorNOG02878;sordNOG06160;opiNOG20610	RS	sp|P39719|FLC2_YEAST Flavin carrier protein 2 OS=Saccharomyces cerevisiae (strain ATCC 204508 / S288c) GN=FLC2 PE=1 SV=2	DUF907 domain protein	18171536	-	GO:0016021//integral component of membrane;	-	-
CCM_05909	708.657	2850.87	2.00824	0.000236844	0.00529484	NW_006271972.1	GO:0016485;GO:0009898;GO:0007126;GO:0001403	K20063	necNOG07163;opiNOG02229;sordNOG15551	R	sp|Q7SGZ5|PALF_NEUCR pH-response regulator protein palF/prr-3 OS=Neurospora crassa (strain ATCC 24698 / 74-OR23-1A / CBS 708.71 / DSM 1257 / FGSC 987) GN=prr-3 PE=3 SV=2	pH response protein PalF	18167927	GO:0016485//protein processing;GO:0001403//invasive growth in response to glucose limitation;	GO:0009898//cytoplasmic side of plasma membrane;	-	-
CCM_08212	688.282	1859.03	1.43348	0.000239901	0.00533836	NW_006271974.1	GO:0008199;GO:0055114;GO:0009712;GO:0018576	K03381	opiNOG48037;opiNOG14901;sordNOG09511	SE	sp|P86029|HQD2_CANAL Catechol 1,2-dioxygenase OS=Candida albicans (strain SC5314 / ATCC MYA-2876) GN=HQD2 PE=1 SV=1	catechol dioxygenase	18170220	GO:0055114//obsolete oxidation-reduction process;GO:0009712//catechol-containing compound metabolic process;	-	GO:0008199//ferric iron binding;GO:0018576//catechol 1,2-dioxygenase activity;	ko00623(Toluene degradation);ko00364(Fluorobenzoate degradation);ko00362(Benzoate degradation);ko00361(Chlorocyclohexane and chlorobenzene degradation)
CCM_05310	21.3374	73.0188	1.77488	0.000242041	0.0053649	NW_006271972.1	GO:0008199;GO:0055114;GO:0006725;GO:0016702	-	sordNOG05693;sordNOG10081;sorNOG00418	R	-	extracellular dioxygenase, putative	18167328	GO:0055114//obsolete oxidation-reduction process;GO:0006725//cellular aromatic compound metabolic process;	-	GO:0008199//ferric iron binding;GO:0016702//oxidoreductase activity, acting on single donors with incorporation of molecular oxygen, incorporation of two atoms of oxygen;	-
CCM_08209	506.211	1474.05	1.54198	0.000244054	0.00539332	NW_006271974.1	GO:0016787	K14333	sordNOG09944;opiNOG06913	R	sp|P80402|DBD23_ASPOR 2,3-dihydroxybenzoate decarboxylase OS=Aspergillus oryzae (strain ATCC 42149 / RIB 40) GN=AO090005000447 PE=1 SV=2	amidohydrolase family protein	18170217	-	-	GO:0016787//hydrolase activity;	ko00627(Aminobenzoate degradation);ko00362(Benzoate degradation)
CCM_05245	61.3576	156.201	1.34809	0.000248546	0.00546744	NW_006271972.1	GO:0016742;GO:0009058	-	opiNOG15036	I	sp|P31907|HOXX_BRADU Hydrogenase maturation factor HoxX OS=Bradyrhizobium diazoefficiens (strain JCM 10833 / IAM 13628 / NBRC 14792 / USDA 110) GN=hoxX PE=4 SV=2	formyl transferase domain-containing protein	18167264	GO:0009058//biosynthetic process;	-	GO:0016742//hydroxymethyl-, formyl- and related transferase activity;	-
CCM_06115	85.7658	206.188	1.26548	0.000260769	0.00565864	NW_006271972.1	GO:0016301;GO:0016310	-	opiNOG21763	S	-	Protein kinase-like domain	18168130	GO:0016310//phosphorylation;	-	GO:0016301//kinase activity;	-
CCM_04613	3553.91	7459.5	1.06967	0.000267651	0.00575599	NW_006271971.1	-	-	sordNOG14390;necNOG14010;opiNOG42020;sorNOG06127	S	-	hypothetical protein	18166636	-	-	-	-
CCM_02383	4974.44	23441.8	2.23647	0.000281133	0.00601226	NW_006271970.1	-	-	sorNOG00076;opiNOG11519;sordNOG10516	R	sp|D4AUF1|WSCD1_ARTBC WSC domain-containing protein ARB_07867 OS=Arthroderma benhamiae (strain ATCC MYA-4681 / CBS 112371) GN=ARB_07867 PE=1 SV=1	WSC domain protein	18164410	-	-	-	-
CCM_04255	106.537	243.854	1.19466	0.000314404	0.00657036	NW_006271971.1	-	-	sordNOG13559;necNOG11604;opiNOG42298	S	-	hypothetical protein	18166278	-	-	-	-
CCM_05549	1210.27	2731.27	1.17424	0.000325529	0.00673347	NW_006271972.1	-	-	sordNOG15616;opiNOG33488	SR	sp|P59234|YIPL_SOLTU Protein yippee-like OS=Solanum tuberosum PE=2 SV=1	yippee family protein	18167567	-	-	-	-
CCM_09321	423.535	1297.19	1.61483	0.000325711	0.00673347	NW_006271976.1	-	-	-	-	-	hypothetical protein	18171324	-	-	-	-
CCM_07980	245.889	691.557	1.49184	0.000328243	0.00675675	NW_006271974.1	GO:0016787;GO:0055085;GO:0022891;GO:0016021	-	opiNOG00758;euNOG37502;eurotNOG05696	R	sp|P07921|LACP_KLULA Lactose permease OS=Kluyveromyces lactis (strain ATCC 8585 / CBS 2359 / DSM 70799 / NBRC 1267 / NRRL Y-1140 / WM37) GN=LAC12 PE=3 SV=1	MFS monosaccharide transporter, putative	18169990	GO:0055085//transmembrane transport;	GO:0016021//integral component of membrane;	GO:0016787//hydrolase activity;	-
CCM_05138	439.717	880.683	1.00205	0.000357696	0.00721745	NW_006271972.1	-	-	opiNOG35933;opiNOG43719;sordNOG13952	SR	sp|Q8U308|RIDA_PYRFU 2-iminobutanoate/2-iminopropanoate deaminase OS=Pyrococcus furiosus (strain ATCC 43587 / DSM 3638 / JCM 8422 / Vc1) GN=yjgF PE=1 SV=1	L-PSP endoribonuclease family protein, putative	18167158	-	-	-	-
CCM_00884	212.274	700.51	1.72248	0.000364224	0.00730957	NW_006271969.1	GO:0050660;GO:0055114;GO:0016614	K00108	opiNOG06135	R	sp|P9WMV4|Y1279_MYCTO Uncharacterized GMC-type oxidoreductase MT1316 OS=Mycobacterium tuberculosis (strain CDC 1551 / Oshkosh) GN=MT1316 PE=3 SV=1	glucose dehydrogenase, putative	18162918	GO:0055114//obsolete oxidation-reduction process;	-	GO:0050660//flavin adenine dinucleotide binding;GO:0016614//oxidoreductase activity, acting on CH-OH group of donors;	ko00260(Glycine, serine and threonine metabolism)
CCM_06339	40.4008	111.208	1.4608	0.000365568	0.00732125	NW_006271972.1	-	-	-	-	-	hypothetical protein	18168353	-	-	-	-
CCM_02065	15513	44975	1.53565	0.000371505	0.00742469	NW_006271970.1	GO:0003840;GO:0006749	K00681	opiNOG05473;COG0405	E	sp|B8NM71|USTH_ASPFN Glutathione hydrolase OS=Aspergillus flavus (strain ATCC 200026 / FGSC A1120 / NRRL 3357 / JCM 12722 / SRRC 167) GN=ustH PE=3 SV=1	gamma-glutamyltranspeptidase	18164094	GO:0006749//glutathione metabolic process;	-	GO:0003840//obsolete gamma-glutamyltransferase activity;	ko00480(Glutathione metabolism);ko00460(Cyanoamino acid metabolism);ko00430(Taurine and hypotaurine metabolism)
CCM_00188	115.647	261.682	1.17808	0.000381552	0.00759392	NW_006271969.1	-	-	sordNOG15246;sordNOG15231;opiNOG45571	S	-	hypothetical protein	18162223	-	-	-	-
CCM_05547	28.3418	85.5473	1.59379	0.000385355	0.00765376	NW_006271972.1	GO:0036361;GO:0006520	-	opiNOG43761;COG1794	SE	sp|P03813|YGEA_ECOLI Putative racemase YgeA OS=Escherichia coli (strain K12) GN=ygeA PE=1 SV=1	aspartate racemase	18167565	GO:0006520//cellular amino acid metabolic process;	-	GO:0036361//racemase activity, acting on amino acids and derivatives;	-
CCM_06355	228.005	471.957	1.04959	0.000386386	0.00765443	NW_006271972.1	-	-	opiNOG24094	S	-	geranylgeranyl pyrophosphate synthetase	18168369	-	-	-	-
CCM_07089	118.309	261.234	1.14279	0.000391969	0.00770551	NW_006271973.1	GO:0016021	-	opiNOG56399;sordNOG08260	S	-	hypothetical protein	18169100	-	GO:0016021//integral component of membrane;	-	-
CCM_09246	7.68019	38.3027	2.31823	0.000400191	0.00781987	NW_006271976.1	GO:0043581	-	magNOG04782;opiNOG32287;sordNOG12348	S	sp|P0DN32|CUPR1_ARTBC Probable GPI-anchored cupredoxin ARB_05732-1 OS=Arthroderma benhamiae (strain ATCC MYA-4681 / CBS 112371) GN=ARB_05732-1 PE=1 SV=1	extracellular serine-rich protein, putative	18171249	GO:0043581//obsolete mycelium development;	-	-	-
CCM_09217	40.0407	153.476	1.93847	0.000415801	0.00800954	NW_006271976.1	GO:0016021	-	hypNOG08337;opiNOG25150	S	-	Extracellular membrane protein, 8-cysteine region, CFEM	18171220	-	GO:0016021//integral component of membrane;	-	-
CCM_02232	5765.71	11708.1	1.02193	0.000426589	0.00813651	NW_006271970.1	GO:0046872;GO:0003676	-	sordNOG05980	R	sp|Q9UTA1|YL8J_SCHPO Zinc finger protein C25B8.19c OS=Schizosaccharomyces pombe (strain 972 / ATCC 24843) GN=SPAC25B8.19c PE=4 SV=2	C2H2 conidiation transcription factor	18164259	-	-	GO:0046872//metal ion binding;GO:0003676//nucleic acid binding;	-
CCM_06122	185.881	802.671	2.11043	0.000432596	0.00820226	NW_006271972.1	GO:0005622;GO:0005525;GO:0007264	-	sordNOG04667;sordNOG07817	R	sp|P34729|RAS1_PHYPO Ras-like protein 1 OS=Physarum polycephalum GN=RAS1 PE=2 SV=1	RAS small monomeric GTPase, putative	18168137	GO:0007264//small GTPase mediated signal transduction;	GO:0005622//intracellular anatomical structure;	GO:0005525//GTP binding;	-
CCM_06277	65.4184	158.568	1.27734	0.000454706	0.00857075	NW_006271972.1	-	-	sordNOG06228	S	-	hypothetical protein	18168292	-	-	-	-
CCM_05125	767.79	1645.66	1.09988	0.000570527	0.0103092	NW_006271972.1	GO:0005975;GO:0004553;GO:0016021	-	opiNOG02423;opiNOG00313;sordNOG07861	R	sp|D4B4J2|CRH12_ARTBC Probable extracellular glycosidase ARB_03382 OS=Arthroderma benhamiae (strain ATCC MYA-4681 / CBS 112371) GN=ARB_03382 PE=3 SV=2	cell wall glucanase, putative	18167145	GO:0005975//carbohydrate metabolic process;	GO:0016021//integral component of membrane;	GO:0004553//hydrolase activity, hydrolyzing O-glycosyl compounds;	-
CCM_00439	121.796	263.472	1.11318	0.000583712	0.0104687	NW_006271969.1	GO:0008270;GO:0008641;GO:0005829;GO:0005634	K10639	sordNOG14128	O	sp|D3Z3K2|CIP1_MOUSE E3 ubiquitin-protein ligase CCNB1IP1 OS=Mus musculus GN=Ccnb1ip1 PE=1 SV=1	hypothetical protein	18162474	-	GO:0005829//cytosol;GO:0005634//nucleus;	GO:0008270//zinc ion binding;GO:0008641//ubiquitin-like modifier activating enzyme activity;	-
CCM_02276	253.251	509.713	1.00912	0.000596953	0.0106072	NW_006271970.1	-	-	-	-	-	hypothetical protein	18164303	-	-	-	-
CCM_02069	44.2229	114.247	1.3693	0.000649721	0.0113974	NW_006271970.1	-	-	-	-	-	hypothetical protein	18164098	-	-	-	-
CCM_06363	17.3766	59.1233	1.76659	0.000688915	0.0120191	NW_006271972.1	-	K18337	sordNOG04804;opiNOG11474	Q	sp|A3LZU7|RM1DH_PICST L-rhamnose-1-dehydrogenase OS=Scheffersomyces stipitis (strain ATCC 58785 / CBS 6054 / NBRC 10063 / NRRL Y-11545) GN=DHG2 PE=1 SV=2	Short-chain dehydrogenase/reductase SDR	18168377	-	-	-	ko00051(Fructose and mannose metabolism)
CCM_06432	100.592	650.6	2.69325	0.000698455	0.0121196	NW_006271973.1	GO:0006355	-	magNOG04281;sorNOG02651;sordNOG09251;opiNOG16598	S	sp|O13360|FLUF_NEUCR Conidial development protein fluffy OS=Neurospora crassa (strain ATCC 24698 / 74-OR23-1A / CBS 708.71 / DSM 1257 / FGSC 987) GN=fl PE=2 SV=1	hypothetical protein	18168446	GO:0006355//regulation of transcription, DNA-templated;	-	-	-
CCM_07978	2624.77	6219.69	1.24465	0.000755192	0.012768	NW_006271974.1	-	-	sordNOG05170;opiNOG07829;COG4289	S	-	hypothetical protein	18169988	-	-	-	-
CCM_07637	1296.49	2611.17	1.01008	0.000758664	0.012768	NW_006271974.1	-	-	sordNOG05278	S	-	hypothetical protein	18169648	-	-	-	-
CCM_08940	73.4084	168.065	1.19501	0.00076053	0.012768	NW_006271975.1	GO:0016021	K07034	sordNOG13278;opiNOG31022	S	sp|Q460G9|ALCS_EMENI Protein alcS OS=Emericella nidulans (strain FGSC A4 / ATCC 38163 / CBS 112.46 / NRRL 194 / M139) GN=alcS PE=2 SV=1	plasma membrane ammonium transporter (Ato3)	18170945	-	GO:0016021//integral component of membrane;	-	-
CCM_01995	9.64639	55.482	2.52396	0.000789543	0.013154	NW_006271970.1	-	-	opiNOG60438	S	-	hypothetical protein	18164024	-	-	-	-
CCM_09120	222.018	444.959	1.00299	0.00081484	0.0133938	NW_006271976.1	-	-	opiNOG02368;necNOG05572;sordNOG15450	R	sp|D4ALG0|LYSM1_ARTBC LysM domain-containing protein ARB_05157 OS=Arthroderma benhamiae (strain ATCC MYA-4681 / CBS 112371) GN=ARB_05157 PE=1 SV=1	LysM domain protein	18171123	-	-	-	-
CCM_04960	200.664	409.959	1.0307	0.000865456	0.0140534	NW_006271971.1	GO:0016742;GO:0016787;GO:0055114;GO:0016491;GO:0009058	-	COG4529	R	-	pyridine nucleotide-disulfide oxidoreductase family protein	18166980	GO:0055114//obsolete oxidation-reduction process;GO:0009058//biosynthetic process;	-	GO:0016742//hydroxymethyl-, formyl- and related transferase activity;GO:0016787//hydrolase activity;GO:0016491//oxidoreductase activity;	-
CCM_01917	2495.47	6394.35	1.35749	0.000881084	0.014259	NW_006271969.1	GO:0005634;GO:0043565;GO:0006355	-	sordNOG06453;opiNOG06186	K	sp|Q99160|HOY1_YARLI Homeobox protein HOY1 OS=Yarrowia lipolytica (strain CLIB 122 / E 150) GN=HOY1 PE=3 SV=2	homeoprotein	18163946	GO:0006355//regulation of transcription, DNA-templated;	GO:0005634//nucleus;	GO:0043565//sequence-specific DNA binding;	-
CCM_07381	15.3628	53.0529	1.78799	0.000896453	0.0144107	NW_006271974.1	GO:0005524;GO:0004637;GO:0046872;GO:0009113	-	opiNOG55254;COG0151;opiNOG00079	F	sp|P20772|PUR2_SCHPO Bifunctional purine biosynthetic protein ADE1 OS=Schizosaccharomyces pombe (strain 972 / ATCC 24843) GN=ade1 PE=3 SV=1	phosphoribosylamine-glycine ligase	18169392	GO:0009113//purine nucleobase biosynthetic process;	-	GO:0005524//ATP binding;GO:0004637//phosphoribosylamine-glycine ligase activity;GO:0046872//metal ion binding;	-
CCM_06406	313.765	697.585	1.15268	0.000903976	0.0144351	NW_006271972.1	GO:0042626;GO:0016021;GO:0005524;GO:0055085	-	opiNOG11164;COG1132	QV	sp|Q8J2Q1|FUM19_GIBM7 ABC transporter FUM19 OS=Gibberella moniliformis (strain M3125 / FGSC 7600) GN=FUM19 PE=2 SV=1	ATP-binding cassette transporter, putative	18168420	GO:0055085//transmembrane transport;	GO:0016021//integral component of membrane;	GO:0042626//ATPase-coupled transmembrane transporter activity;GO:0005524//ATP binding;	-
CCM_03307	645.921	1431.73	1.14833	0.000934685	0.0148515	NW_006271970.1	-	-	hypNOG04906;sordNOG08161;sordNOG09520	RS	-	hypothetical protein	18165333	-	-	-	-
CCM_06568	2278.24	5385.03	1.24104	0.00094315	0.0149366	NW_006271973.1	GO:2000251;GO:0000156;GO:0030295;GO:0004707;GO:0007234;GO:0042803;GO:0000167;GO:0010971;GO:0032872;GO:0005737;GO:0031435;GO:0031954;GO:1990315;GO:0032153	K11233	sordNOG10409;opiNOG04023	T	sp|P87323|MCS4_SCHPO Response regulator mcs4 OS=Schizosaccharomyces pombe (strain 972 / ATCC 24843) GN=mcs4 PE=4 SV=1	response regulator	18168582	GO:2000251//positive regulation of actin cytoskeleton reorganization;GO:0007234//osmosensory signaling via phosphorelay pathway;GO:0010971//positive regulation of G2/M transition of mitotic cell cycle;GO:0032872//regulation of stress-activated MAPK cascade;GO:0031954//positive regulation of protein autophosphorylation;	GO:0005737//cytoplasm;GO:1990315//Mcs4 RR-MAPKKK complex;GO:0032153//cell division site;	GO:0000156//phosphorelay response regulator activity;GO:0030295//protein kinase activator activity;GO:0004707//MAP kinase activity;GO:0042803//protein homodimerization activity;GO:0031435//mitogen-activated protein kinase kinase kinase binding;	ko04139(Mitophagy - yeast);ko04011(MAPK signaling pathway - yeast);ko02020(Two-component system)
CCM_00533	427.545	1777.81	2.05595	0.00103223	0.0159788	NW_006271969.1	-	-	sordNOG14365	S	-	hypothetical protein	18162568	-	-	-	-
CCM_02449	95.9899	225.981	1.23525	0.00106318	0.0162922	NW_006271970.1	-	-	-	-	-	hypothetical protein	18164476	-	-	-	-
CCM_09227	137.214	280.31	1.0306	0.00117502	0.0177323	NW_006271976.1	GO:0008270;GO:0006357;GO:0005634;GO:0000981	-	eurotNOG11284;opiNOG58861;necNOG11256	S	-	Fungal transcriptional regulatory protein	18171230	GO:0006357//regulation of transcription by RNA polymerase II;	GO:0005634//nucleus;	GO:0008270//zinc ion binding;GO:0000981//DNA-binding transcription factor activity, RNA polymerase II-specific;	-
CCM_02395	86.9617	214.319	1.30131	0.0011813	0.0177713	NW_006271970.1	-	-	-	-	-	hypothetical protein	18164422	-	-	-	-
CCM_06116	1587.89	3587.27	1.17578	0.00126701	0.0187669	NW_006271972.1	GO:0035335;GO:0004725;GO:0008138	-	sordNOG13910;opiNOG39347	V	sp|Q9UNI6|DUS12_HUMAN Dual specificity protein phosphatase 12 OS=Homo sapiens GN=DUSP12 PE=1 SV=1	Dual specificity phosphatase, catalytic domain	18168131	GO:0035335//peptidyl-tyrosine dephosphorylation;	-	GO:0004725//protein tyrosine phosphatase activity;GO:0008138//protein tyrosine/serine/threonine phosphatase activity;	-
CCM_07826	213.084	701.162	1.71833	0.00130168	0.0191918	NW_006271974.1	GO:0055085;GO:0016021	-	pleNOG00584;opiNOG03119	R	sp|Q870L2|MIRB_EMENI Siderophore iron transporter mirB OS=Emericella nidulans (strain FGSC A4 / ATCC 38163 / CBS 112.46 / NRRL 194 / M139) GN=mirB PE=3 SV=1	siderophore iron transporter mirB	18169836	GO:0055085//transmembrane transport;	GO:0016021//integral component of membrane;	-	-
CCM_06120	973.409	3994.22	2.0368	0.00135997	0.0198986	NW_006271972.1	-	K24611	sordNOG05265;opiNOG07148	S	sp|Q9ZVJ2|AMERL_ARATH Uncharacterized protein At2g38710 OS=Arabidopsis thaliana GN=At2g38710 PE=2 SV=1	ammecr1 family protein	18168135	-	-	-	-
CCM_08162	439.746	1101.17	1.3243	0.00136236	0.0199033	NW_006271974.1	GO:0005622;GO:0023014;GO:0000155;GO:0000160	-	sordNOG07767;opiNOG06478	T	sp|Q54YZ9|DHKJ_DICDI Hybrid signal transduction histidine kinase J OS=Dictyostelium discoideum GN=dhkJ PE=3 SV=2	autoinducer 2 sensor kinase/phosphatase luxQ	18170171	GO:0000160//phosphorelay signal transduction system;	GO:0005622//intracellular anatomical structure;	GO:0000155//phosphorelay sensor kinase activity;	-
CCM_00063	28.0175	213.817	2.93197	0.00138944	0.0201921	NW_006271969.1	GO:0016740;GO:0016021	-	sordNOG08234	S	-	polysaccharide synthase, putative	18162098	-	GO:0016021//integral component of membrane;	GO:0016740//transferase activity;	-
CCM_02070	28.6652	78.1505	1.44696	0.00139053	0.0201921	NW_006271970.1	-	-	-	-	-	hypothetical protein	18164099	-	-	-	-
CCM_07162	49.3131	116.845	1.24455	0.0014072	0.0203419	NW_006271973.1	GO:0006480;GO:0008168	K16219	opiNOG62138;sordNOG10799;opiNOG25482;sordNOG07469	R	sp|O13748|NTM1_SCHPO Alpha N-terminal protein methyltransferase 1 OS=Schizosaccharomyces pombe (strain 972 / ATCC 24843) GN=tae1 PE=3 SV=1	DUF858 domain protein	18169173	GO:0006480//N-terminal protein amino acid methylation;	-	GO:0008168//methyltransferase activity;	-
CCM_03098	152.446	400.783	1.39452	0.00142725	0.0206008	NW_006271970.1	-	-	-	-	-	hypothetical protein	18165125	-	-	-	-
CCM_02210	57.438	240.473	2.0658	0.00145386	0.0208512	NW_006271970.1	-	-	fuNOG00029;opiNOG18275;sorNOG02482;sordNOG04435	ROG	sp|D4AUF1|WSCD1_ARTBC WSC domain-containing protein ARB_07867 OS=Arthroderma benhamiae (strain ATCC MYA-4681 / CBS 112371) GN=ARB_07867 PE=1 SV=1	copper radical oxidase	18164237	-	-	-	-
CCM_06405	303.297	901.503	1.5716	0.00146649	0.0209012	NW_006271972.1	-	-	-	-	-	hypothetical protein	18168419	-	-	-	-
CCM_03883	111.084	246.965	1.15266	0.00147614	0.0209913	NW_006271971.1	GO:0055114;GO:0016491	K22745	hypNOG11433;COG0446;opiNOG45809	RC	sp|A1A653|FER8_USTMA Fe-regulated protein 8 OS=Ustilago maydis (strain 521 / FGSC 9021) GN=fer8 PE=2 SV=1	apoptosis-inducing factor, putative	18165906	GO:0055114//obsolete oxidation-reduction process;	-	GO:0016491//oxidoreductase activity;	ko04115(p53 signaling pathway)
CCM_02970	568.069	2351.31	2.04933	0.00158972	0.0220202	NW_006271970.1	-	-	opiNOG80871;hypNOG02149;necNOG07458;sordNOG12329	S	-	hypothetical protein	18164997	-	-	-	-
CCM_02969	5.37034	32.34	2.59023	0.0016722	0.0228087	NW_006271970.1	GO:0050661;GO:0055114;GO:0050660;GO:0004499	-	COG2072;sordNOG06625;sorNOG06610	PQ	sp|Q9HFE4|FMO1_SCHPO Thiol-specific monooxygenase OS=Schizosaccharomyces pombe (strain 972 / ATCC 24843) GN=fmo1 PE=1 SV=1	Flavin-containing monooxygenase FMO	18164996	GO:0055114//obsolete oxidation-reduction process;	-	GO:0050661//NADP binding;GO:0050660//flavin adenine dinucleotide binding;GO:0004499//N,N-dimethylaniline monooxygenase activity;	-
CCM_05322	870.463	2215.14	1.34755	0.00172326	0.023431	NW_006271972.1	GO:0009086;GO:0003871;GO:0008270;GO:0032259	-	opiNOG15956	S	sp|P42318|YXJG_BACSU Uncharacterized protein YxjG OS=Bacillus subtilis (strain 168) GN=yxjG PE=4 SV=3	Methionine synthase, vitamin-B12 independent, putative	18167340	GO:0009086//methionine biosynthetic process;GO:0032259//methylation;	-	GO:0003871//5-methyltetrahydropteroyltriglutamate-homocysteine S-methyltransferase activity;GO:0008270//zinc ion binding;	-
CCM_02177	0	81.6592	Inf	0.0019019	0.0250109	NW_006271970.1	GO:0030246;GO:0004190;GO:0006508	-	opiNOG28710;sordNOG08190;opiNOG28582;NOG51745	RS	sp|P24665|PRTA_ASPNG Aspergillopepsin-2 OS=Aspergillus niger PE=1 SV=1	Concanavalin A-like lectin/glucanase	18164205	GO:0006508//proteolysis;	-	GO:0030246//carbohydrate binding;GO:0004190//aspartic-type endopeptidase activity;	-
CCM_00628	98.1621	203.14	1.04923	0.00191951	0.0251735	NW_006271969.1	GO:0050113;GO:0019310;GO:0055114;GO:0005737;GO:0005506	K00469	sordNOG07773;opiNOG06092	R	sp|Q9QXN5|MIOX_MOUSE Inositol oxygenase OS=Mus musculus GN=Miox PE=1 SV=2	inositol oxygenase	18162663	GO:0019310//inositol catabolic process;GO:0055114//obsolete oxidation-reduction process;	GO:0005737//cytoplasm;	GO:0050113//inositol oxygenase activity;GO:0005506//iron ion binding;	ko00562(Inositol phosphate metabolism);ko00053(Ascorbate and aldarate metabolism)
CCM_02054	1106.94	6386.29	2.5284	0.00195284	0.0255063	NW_006271970.1	GO:0055114;GO:0010181;GO:0016491;GO:0016021	-	opiNOG30976	S	sp|B8NM62|USTO_ASPFN Pyridoxamine 5&apos;-phosphate oxidase family protein ustO OS=Aspergillus flavus (strain ATCC 200026 / FGSC A1120 / NRRL 3357 / JCM 12722 / SRRC 167) GN=ustO PE=3 SV=1	pyridoxamine phosphate oxidase family protein	18164083	GO:0055114//obsolete oxidation-reduction process;	GO:0016021//integral component of membrane;	GO:0010181//FMN binding;GO:0016491//oxidoreductase activity;	-
CCM_08579	112.539	228.094	1.0192	0.00240573	0.0298789	NW_006271975.1	GO:0055085;GO:0042626;GO:0016021;GO:0005524	-	sorNOG04284;sorNOG02807;opiNOG12650	Q	sp|Q9C8G9|AB1C_ARATH ABC transporter C family member 1 OS=Arabidopsis thaliana GN=ABCC1 PE=1 SV=1	ABC bile acid transporter, putative	18170585	GO:0055085//transmembrane transport;	GO:0016021//integral component of membrane;	GO:0042626//ATPase-coupled transmembrane transporter activity;GO:0005524//ATP binding;	-
CCM_00147	2416.85	5283	1.12823	0.00253545	0.0310487	NW_006271969.1	-	-	sordNOG13279;opiNOG40387	SR	sp|Q4WCX9|YA280_ASPFU Uncharacterized protein AFUA_6G02800 OS=Neosartorya fumigata (strain ATCC MYA-4609 / Af293 / CBS 101355 / FGSC A1100) GN=AFUA_6G02800 PE=1 SV=1	hypothetical protein	18162182	-	-	-	-
CCM_09272	197.849	403.358	1.02766	0.00254293	0.0311007	NW_006271976.1	GO:0016021	-	opiNOG60156;opiNOG60688	S	-	hypothetical protein	18171275	-	GO:0016021//integral component of membrane;	-	-
CCM_02063	7963.62	31968.4	2.00515	0.00256993	0.0312662	NW_006271970.1	GO:0016740	-	opiNOG41198;sordNOG08976;sorNOG08418	R	sp|B8NM78|USTM_ASPFN Methyltransferase ustM OS=Aspergillus flavus (strain ATCC 200026 / FGSC A1120 / NRRL 3357 / JCM 12722 / SRRC 167) GN=ustM PE=1 SV=2	hypothetical protein	18164092	-	-	GO:0016740//transferase activity;	-
CCM_02131	1517.98	3484.88	1.19895	0.00258523	0.0313785	NW_006271970.1	GO:0006807;GO:0016810	K01501	opiNOG18822;sordNOG05513;sordNOG09668	E	sp|Q89PT3|NITR2_BRADU Nitrilase blr3397 OS=Bradyrhizobium diazoefficiens (strain JCM 10833 / IAM 13628 / NBRC 14792 / USDA 110) GN=blr3397 PE=1 SV=1	hydrolase, carbon-nitrogen family protein	18164159	GO:0006807//nitrogen compound metabolic process;	-	GO:0016810//hydrolase activity, acting on carbon-nitrogen (but not peptide) bonds;	ko00910(Nitrogen metabolism);ko00643(Styrene degradation);ko00627(Aminobenzoate degradation);ko00460(Cyanoamino acid metabolism);ko00380(Tryptophan metabolism)
CCM_08510	268.497	758.342	1.49794	0.00278443	0.0331707	NW_006271975.1	GO:0055085;GO:0016021	-	opiNOG22079;sordNOG07159;hypNOG05678;COG0530	P	sp|Q0ZAI3|CAXA_ALKAM Putative antiporter CaxA OS=Alkalimonas amylolytica GN=caxA PE=3 SV=1	Sodium/calcium exchanger membrane region	18170517	GO:0055085//transmembrane transport;	GO:0016021//integral component of membrane;	-	-
CCM_06034	53.1021	119.165	1.16611	0.00282126	0.033318	NW_006271972.1	GO:0016021	-	hypNOG14274	S	-	hypothetical protein	18168051	-	GO:0016021//integral component of membrane;	-	-
CCM_03688	209.771	508.671	1.27792	0.0031906	0.0361689	NW_006271971.1	GO:0055114;GO:0051213;GO:0020037	K00463	sordNOG10116;opiNOG17428;sordNOG09647	EHR	sp|P14902|I23O1_HUMAN Indoleamine 2,3-dioxygenase 1 OS=Homo sapiens GN=IDO1 PE=1 SV=1	indoleamine 2,3-dioxygenase family protein	18165712	GO:0055114//obsolete oxidation-reduction process;	-	GO:0051213//dioxygenase activity;GO:0020037//heme binding;	ko05143(African trypanosomiasis);ko00380(Tryptophan metabolism)
CCM_05441	29.3361	74.7953	1.35027	0.00327682	0.0369122	NW_006271972.1	-	-	-	-	-	hypothetical protein	18167459	-	-	-	-
CCM_03212	843.663	2140.86	1.34345	0.00327921	0.0369122	NW_006271970.1	GO:0004371;GO:0016310;GO:0006071;GO:0005524	K00863	sordNOG05239;opiNOG03609	G	sp|O13902|DAK1_SCHPO Dihydroxyacetone kinase 1 OS=Schizosaccharomyces pombe (strain 972 / ATCC 24843) GN=dak1 PE=3 SV=1	dihydroxyacetone kinase	18165238	GO:0016310//phosphorylation;GO:0006071//glycerol metabolic process;	-	GO:0004371//glycerone kinase activity;GO:0005524//ATP binding;	ko04622(RIG-I-like receptor signaling pathway);ko00680(Methane metabolism);ko00561(Glycerolipid metabolism);ko00051(Fructose and mannose metabolism)
CCM_06452	54.6008	119.149	1.12577	0.00334356	0.0375048	NW_006271973.1	GO:0055085;GO:0005215;GO:0016021	-	necNOG12699;sordNOG04251	R	sp|G3XMC9|AZAK_ASPNA Efflux pump azaK OS=Aspergillus niger (strain ATCC 1015 / CBS 113.46 / FGSC A1144 / LSHB Ac4 / NCTC 3858a / NRRL 328 / USDA 3528.7) GN=azaK PE=2 SV=1	Major facilitator superfamily transporter	18168466	GO:0055085//transmembrane transport;	GO:0016021//integral component of membrane;	GO:0005215//transporter activity;	-
CCM_08952	218.098	487.84	1.16143	0.00350663	0.0386574	NW_006271975.1	GO:0055085;GO:0016021	K02429	sorNOG00653;sordNOG11509	R	sp|P11551|FUCP_ECOLI L-fucose-proton symporter OS=Escherichia coli (strain K12) GN=fucP PE=1 SV=3	l-fucose permease, putative	18170956	GO:0055085//transmembrane transport;	GO:0016021//integral component of membrane;	-	-
CCM_02374	252.452	1988.8	2.97782	0.00359268	0.0394252	NW_006271970.1	GO:0055114;GO:0016491;GO:0016740;GO:0031177	-	opiNOG01973;sordNOG15538	IQ	sp|N4WHE3|PKS1_COCH4 Reducing polyketide synthase PKS1 OS=Cochliobolus heterostrophus (strain C4 / ATCC 48331 / race T) GN=PKS1 PE=3 SV=1	polyketide synthase, putative	18164401	GO:0055114//obsolete oxidation-reduction process;	-	GO:0016491//oxidoreductase activity;GO:0016740//transferase activity;GO:0031177//phosphopantetheine binding;	-
CCM_06005	840.219	1787.99	1.08951	0.0036536	0.0399114	NW_006271972.1	GO:0010181;GO:0055114;GO:0045892;GO:0016491	K03809	sorNOG07339;opiNOG01771	R	sp|P42058|ALTA7_ALTAL Minor allergen Alt a 7 OS=Alternaria alternata GN=ALTA7 PE=1 SV=1	minor allergen Alt a 7	18168023	GO:0055114//obsolete oxidation-reduction process;GO:0045892//negative regulation of transcription, DNA-templated;	-	GO:0010181//FMN binding;GO:0016491//oxidoreductase activity;	ko00130(Ubiquinone and other terpenoid-quinone biosynthesis)
CCM_02416	21.3777	58.7452	1.45836	0.00371636	0.0403221	NW_006271970.1	-	-	-	-	-	hypothetical protein	18164443	-	-	-	-
CCM_05880	814.453	1898.46	1.22092	0.00387625	0.041634	NW_006271972.1	-	-	opiNOG34105;NOG92661;sordNOG13541	S	-	hypothetical protein	18167898	-	-	-	-
CCM_05515	136.118	275.522	1.01731	0.00400446	0.0428197	NW_006271972.1	-	-	sordNOG15220;opiNOG58553;sordNOG14749	S	-	hypothetical protein	18167533	-	-	-	-
CCM_07168	13067.9	38586.2	1.56206	0.00412475	0.0436149	NW_006271973.1	-	-	necNOG10386;opiNOG29477	S	-	isoflavone reductase family protein	18169179	-	-	-	-
CCM_00716	263.772	532.948	1.0147	0.00413328	0.0436149	NW_006271969.1	GO:0055114;GO:0016491;GO:0008270	-	sordNOG12351;opiNOG28614	CR	sp|Q5AUW6|ORSE_EMENI Dehydrogenase orsE OS=Emericella nidulans (strain FGSC A4 / ATCC 38163 / CBS 112.46 / NRRL 194 / M139) GN=orsE PE=2 SV=1	Alcohol dehydrogenase superfamily, zinc-containing	18162750	GO:0055114//obsolete oxidation-reduction process;	-	GO:0016491//oxidoreductase activity;GO:0008270//zinc ion binding;	-
CCM_08507	21.6268	58.9988	1.44786	0.0041674	0.0439241	NW_006271975.1	GO:0055085;GO:0016021	-	opiNOG14967;hypNOG00963	T	sp|O23482|OPT3_ARATH Oligopeptide transporter 3 OS=Arabidopsis thaliana GN=OPT3 PE=2 SV=3	oligopeptide transporter	18170514	GO:0055085//transmembrane transport;	GO:0016021//integral component of membrane;	-	-
CCM_06340	15.6158	46.9397	1.5878	0.00432833	0.0449333	NW_006271972.1	-	-	-	-	-	hypothetical protein	18168354	-	-	-	-
CCM_01911	77.2513	156.598	1.01944	0.00434897	0.0450988	NW_006271969.1	GO:0055085;GO:0016021	-	opiNOG02945;hypNOG09594;NOG00172;sorNOG04548	G	sp|Q10097|YAOI_SCHPO Uncharacterized transporter C11D3.18C OS=Schizosaccharomyces pombe (strain 972 / ATCC 24843) GN=SPAC11D3.18c PE=3 SV=1	MFS transporter, putative	18163940	GO:0055085//transmembrane transport;	GO:0016021//integral component of membrane;	-	-
CCM_06032	74.4996	152.387	1.03243	0.00446351	0.0460383	NW_006271972.1	-	-	opiNOG32826;COG1028	IQ	sp|Q9LBG2|LVR_LEIAQ Levodione reductase OS=Leifsonia aquatica GN=lvr PE=1 SV=1	short chain dehydrogenase/reductase family oxidoreductase, putative	18168049	-	-	-	-
CCM_00941	573.017	1541.41	1.4276	0.0046535	0.0475389	NW_006271969.1	-	-	opiNOG41432;sordNOG13579	S	-	hypothetical protein	18162974	-	-	-	-
CCM_08207	21.365	58.0159	1.4412	0.00470106	0.0478512	NW_006271974.1	GO:0005975;GO:0004565	-	sorNOG07288;opiNOG04358	G	sp|P48982|BGAL_XANMN Beta-galactosidase OS=Xanthomonas manihotis GN=bga PE=1 SV=1	beta-calactosidase, putative	18170215	GO:0005975//carbohydrate metabolic process;	-	GO:0004565//beta-galactosidase activity;	-
CCM_01847	1349.56	3378.2	1.32376	0.00479778	0.0484974	NW_006271969.1	GO:0045944;GO:0000122;GO:0030437;GO:0071454;GO:0046872;GO:0005634;GO:0009272;GO:0000917;GO:0003676;GO:0007126;GO:0001078;GO:0071469	-	sordNOG08921;opiNOG21596	K	sp|Q870A3|PACC_FUSO4 pH-response transcription factor pacC/RIM101 OS=Fusarium oxysporum f. sp. lycopersici (strain 4287 / CBS 123668 / FGSC 9935 / NRRL 34936) GN=pacC PE=1 SV=1	pH-response transcription factor pacC/RIM101	18163876	GO:0045944//positive regulation of transcription by RNA polymerase II;GO:0000122//negative regulation of transcription by RNA polymerase II;GO:0030437//ascospore formation;GO:0071454//cellular response to anoxia;GO:0009272//fungal-type cell wall biogenesis;GO:0000917//division septum assembly;GO:0071469//cellular response to alkaline pH;	GO:0005634//nucleus;	GO:0046872//metal ion binding;GO:0003676//nucleic acid binding;	-
CCM_05374	32.0103	76.2282	1.25179	0.00497688	0.0496231	NW_006271972.1	GO:0016310;GO:0016301	-	sordNOG06433;opiNOG37165	R	-	Protein kinase-like domain	18167392	GO:0016310//phosphorylation;	-	GO:0016301//kinase activity;	-
CCM_05747	2017.9	5272.36	1.38559	0.00502175	0.0499215	NW_006271972.1	GO:0016491;GO:0008270;GO:0055114	-	opiNOG21203	Q	sp|P39849|XYLB_PSEPU Aryl-alcohol dehydrogenase OS=Pseudomonas putida GN=xylB PE=1 SV=1	alcohol dehydrogenase, putative	18167765	GO:0055114//obsolete oxidation-reduction process;	-	GO:0016491//oxidoreductase activity;GO:0008270//zinc ion binding;	-
CCM_07799	498.562	1396.25	1.48571	0.00515842	0.0509639	NW_006271974.1	-	-	sordNOG14755;opiNOG48938	S	sp|Q8S8S9|MES1_ARATH Methylesterase 1 OS=Arabidopsis thaliana GN=MES1 PE=1 SV=1	hypothetical protein	18169809	-	-	-	-
CCM_03380	42.3503	98.187	1.21316	0.00530146	0.0521093	NW_006271970.1	-	-	-	-	-	hypothetical protein	18165406	-	-	-	-
CCM_08087	619.77	2004.7	1.69358	0.00558921	0.0541917	NW_006271974.1	GO:0003824;GO:0000287;GO:0030976	-	sordNOG07472;opiNOG21935	S	sp|P20906|MDLC_PSEPU Benzoylformate decarboxylase OS=Pseudomonas putida GN=mdlC PE=1 SV=2	acetolactate synthase	18170096	-	-	GO:0003824//catalytic activity;GO:0000287//magnesium ion binding;GO:0030976//thiamine pyrophosphate binding;	-
CCM_07099	794.47	1755.96	1.1442	0.0055894	0.0541917	NW_006271973.1	-	-	sordNOG04104	S	-	WSC domain-containing protein	18169110	-	-	-	-
CCM_08403	54.3602	183.624	1.75613	0.00609486	0.0571609	NW_006271975.1	-	-	sordNOG09882	S	-	hypothetical protein	18170411	-	-	-	-
CCM_01856	25.6644	160.758	2.64705	0.00612716	0.0573519	NW_006271969.1	-	-	sordNOG07524;opiNOG22099	S	-	NAD(P)-binding domain	18163885	-	-	-	-
CCM_01969	2245.84	4513.47	1.00698	0.0061677	0.0574768	NW_006271970.1	GO:0005938;GO:0005543;GO:0032065	-	sordNOG05121;opiNOG07809;sorNOG04206	S	sp|Q00083|APSA_EMENI Anucleate primary sterigmata protein A OS=Emericella nidulans (strain FGSC A4 / ATCC 38163 / CBS 112.46 / NRRL 194 / M139) GN=apsA PE=1 SV=2	nuclear migration protein, putative	18163998	GO:0032065//maintenance of protein location in cell cortex;	GO:0005938//cell cortex;	GO:0005543//phospholipid binding;	-
CCM_08793	1306.87	4351.29	1.73533	0.00621696	0.0578103	NW_006271975.1	-	-	necNOG12294	S	-	hypothetical protein	18170798	-	-	-	-
CCM_05542	594.739	1375.79	1.20993	0.0062606	0.0579799	NW_006271972.1	-	-	chaNOG05731;hypNOG08259;sordNOG07994	S	-	hypothetical protein	18167560	-	-	-	-
CCM_09062	82.3453	177.081	1.10466	0.00628622	0.0580494	NW_006271975.1	-	-	sordNOG08602;opiNOG24673;pleNOG03470	R	-	cell surface protein (Mas1)	18171065	-	-	-	-
CCM_09485	196.118	552.941	1.4954	0.00643559	0.0591447	NW_006271977.1	-	-	sordNOG04868;opiNOG09691;sorNOG06889	R	sp|P53626|E13B_TRIHA Glucan endo-1,3-beta-glucosidase BGN13.1 OS=Trichoderma harzianum GN=bgn13.1 PE=1 SV=1	glucan endo-1,3-beta-glucosidase BGN13.1 precursor	18171487	-	-	-	-
CCM_01902	95.0088	194.891	1.03653	0.00681219	0.0616625	NW_006271969.1	-	-	-	-	-	hypothetical protein	18163931	-	-	-	-
CCM_08557	51.4066	108.156	1.07309	0.0069067	0.0622834	NW_006271975.1	GO:0016021	-	-	-	-	hypothetical protein	18170564	-	GO:0016021//integral component of membrane;	-	-
CCM_04958	4429.92	25776.7	2.54071	0.00698373	0.0627204	NW_006271971.1	GO:0005975;GO:0004553	-	opiNOG06339;sordNOG11943	G	sp|O18835|BGLR_CANLF Beta-glucuronidase OS=Canis lupus familiaris GN=GUSB PE=1 SV=1	hydrolase, putative	18166978	GO:0005975//carbohydrate metabolic process;	-	GO:0004553//hydrolase activity, hydrolyzing O-glycosyl compounds;	-
CCM_08976	27.5697	66.2573	1.265	0.00748564	0.0657376	NW_006271975.1	-	-	pleNOG09214;opiNOG31965;opiNOG31843;sorNOG08573	SR	-	Cyclin-like F-box	18170980	-	-	-	-
CCM_08606	115.558	279.676	1.27514	0.00758459	0.0664032	NW_006271975.1	GO:0009058;GO:0008483;GO:0030170	K00652	opiNOG06976;sordNOG11782;sorNOG07625	HE	sp|Q1DCV8|BIOF_MYXXD 8-amino-7-oxononanoate synthase OS=Myxococcus xanthus (strain DK 1622) GN=bioF PE=3 SV=1	aminotransferase, putative	18170612	GO:0009058//biosynthetic process;	-	GO:0008483//transaminase activity;GO:0030170//pyridoxal phosphate binding;	ko00780(Biotin metabolism)
CCM_03134	77.7059	161.187	1.05264	0.00835089	0.0715482	NW_006271970.1	GO:0016021	-	opiNOG45275	S	-	hypothetical protein	18165161	-	GO:0016021//integral component of membrane;	-	-
CCM_09479	687.85	8684	3.65819	0.00869847	0.0737105	NW_006271977.1	GO:0030598;GO:0017148	-	NOG137058	S	sp|P28590|ABRC_ABRPR Abrin-c OS=Abrus precatorius PE=1 SV=1	Ribosome-inactivating protein	18171481	GO:0017148//negative regulation of translation;	-	GO:0030598//rRNA N-glycosylase activity;	-
CCM_07116	33967.8	71417.9	1.07212	0.00922195	0.0770874	NW_006271973.1	-	-	-	-	-	hypothetical protein	18169127	-	-	-	-
CCM_00498	490.372	1135.56	1.21146	0.00929564	0.0775013	NW_006271969.1	-	-	-	-	-	hypothetical protein	18162533	-	-	-	-
CCM_05096	778.576	1774.6	1.18859	0.00944158	0.078243	NW_006271972.1	GO:0006564;GO:0051287;GO:0004617;GO:0055114;GO:0016597	K00058	opiNOG05818	E	sp|O04130|SERA2_ARATH D-3-phosphoglycerate dehydrogenase 2, chloroplastic OS=Arabidopsis thaliana GN=PGDH2 PE=1 SV=2	d-3-phosphoglycerate dehydrogenase	18167116	GO:0006564//L-serine biosynthetic process;GO:0055114//obsolete oxidation-reduction process;	-	GO:0051287//NAD binding;GO:0004617//phosphoglycerate dehydrogenase activity;GO:0016597//amino acid binding;	ko00680(Methane metabolism);ko00270(Cysteine and methionine metabolism);ko00260(Glycine, serine and threonine metabolism)
CCM_08473	5.64945	23.2349	2.04011	0.00960227	0.0793012	NW_006271975.1	GO:0018101;GO:0005737;GO:0004668;GO:0005509	-	opiNOG12085	R	sp|Q9Z183|PADI4_MOUSE Protein-arginine deiminase type-4 OS=Mus musculus GN=Padi4 PE=2 SV=3	putative protein-arginine deiminase	18170480	GO:0018101//protein citrullination;	GO:0005737//cytoplasm;	GO:0004668//protein-arginine deiminase activity;GO:0005509//calcium ion binding;	-
CCM_08713	288.268	963.8	1.74132	0.00989863	0.0811907	NW_006271975.1	GO:0005975;GO:0004553	K01207	opiNOG23888	G	sp|P40406|NAGZ_BACSU Beta-hexosaminidase OS=Bacillus subtilis (strain 168) GN=nagZ PE=1 SV=1	beta-N-acetylglucosaminidase, putative	18170719	GO:0005975//carbohydrate metabolic process;	-	GO:0004553//hydrolase activity, hydrolyzing O-glycosyl compounds;	ko01501(beta-Lactam resistance);ko00531(Glycosaminoglycan degradation);ko00520(Amino sugar and nucleotide sugar metabolism)
CCM_08377	882.809	3435.28	1.96025	0.0099844	0.0815603	NW_006271975.1	-	-	sordNOG14782;fuNOG21579	R	sp|Q00371|CAP22_COLGL Protein CAP22 OS=Colletotrichum gloeosporioides GN=CAP22 PE=2 SV=1	hypothetical protein	18170385	-	-	-	-
CCM_01068	442.038	1037.26	1.23053	0.00998611	0.0815603	NW_006271969.1	GO:0009225;GO:0008460	-	opiNOG14134;sorNOG01812	G	sp|Q9SYM5|RHM1_ARATH Trifunctional UDP-glucose 4,6-dehydratase/UDP-4-keto-6-deoxy-D-glucose 3,5-epimerase/UDP-4-keto-L-rhamnose-reductase RHM1 OS=Arabidopsis thaliana GN=RHM1 PE=1 SV=1	dtdp-glucose 4,6-dehydratase	18163101	GO:0009225//nucleotide-sugar metabolic process;	-	GO:0008460//dTDP-glucose 4,6-dehydratase activity;	-
CCM_02064	2440.12	6953.37	1.51076	0.0101134	0.0822906	NW_006271970.1	GO:0016740	-	NOG51395;opiNOG46945	OS	sp|B8NM79|USTS_ASPFN Glutathione S-transferase-like protein ustS OS=Aspergillus flavus (strain ATCC 200026 / FGSC A1120 / NRRL 3357 / JCM 12722 / SRRC 167) GN=ustS PE=1 SV=2	glutathione S-transferase, putative	18164093	-	-	GO:0016740//transferase activity;	-
CCM_00866	104.982	229.311	1.12716	0.0104126	0.0837629	NW_006271969.1	-	-	hypNOG12561;necNOG09870	S	-	RNA polymerase II accessory factor, Cdc73	18162900	-	-	-	-
CCM_06064	918.052	2107.06	1.19859	0.0112025	0.0883098	NW_006271972.1	GO:0016301;GO:0016310	K06981	-	-	sp|O26153|IPK_METTH Isopentenyl phosphate kinase OS=Methanothermobacter thermautotrophicus (strain ATCC 29096 / DSM 1053 / JCM 10044 / NBRC 100330 / Delta H) GN=MTH_47 PE=1 SV=1	kinase	18168079	GO:0016310//phosphorylation;	-	GO:0016301//kinase activity;	ko00900(Terpenoid backbone biosynthesis)
CCM_02496	149.338	359.771	1.2685	0.0115275	0.0900192	NW_006271970.1	-	-	sordNOG11912;sordNOG15576;opiNOG51497	S	-	hypothetical protein	18164523	-	-	-	-
CCM_03441	243.867	1041.51	2.09451	0.0117255	0.0912693	NW_006271970.1	-	-	necNOG13772;opiNOG42636;sordNOG14725	SR	-	siderophore biosynthesis enzyme, putative	18165467	-	-	-	-
CCM_01643	336.629	962.703	1.51593	0.0128182	0.0976398	NW_006271969.1	GO:0004190;GO:0006508	-	sorNOG07465;sordNOG09201;opiNOG06731	O	sp|B8NLY9|PEPA_ASPFN Aspergillopepsin-1 OS=Aspergillus flavus (strain ATCC 200026 / FGSC A1120 / NRRL 3357 / JCM 12722 / SRRC 167) GN=pepA PE=3 SV=1	penicillopepsin	18163673	GO:0006508//proteolysis;	-	GO:0004190//aspartic-type endopeptidase activity;	-
CCM_04842	11.0246	33.2445	1.59238	0.01288	0.0977657	NW_006271971.1	GO:0050662;GO:0016853	-	sordNOG12409;COG0451	MV	sp|Q9UT59|YKJ7_SCHPO Putative uncharacterized oxidoreductase C513.07 OS=Schizosaccharomyces pombe (strain 972 / ATCC 24843) GN=SPAC513.07 PE=3 SV=1	3-beta hydroxysteroid dehydrogenase/isomerase, putative	18166863	-	-	GO:0050662//obsolete coenzyme binding;GO:0016853//isomerase activity;	-
CCM_02057	9538.71	30405.5	1.67247	0.0129588	0.0980114	NW_006271970.1	GO:0055114;GO:0050660;GO:0050661;GO:0004499	-	opiNOG11408;COG2072	QP	sp|B8NM73|USTF2_ASPFN Flavin-containing monooxygenase ustF2 OS=Aspergillus flavus (strain ATCC 200026 / FGSC A1120 / NRRL 3357 / JCM 12722 / SRRC 167) GN=ustF2 PE=1 SV=1	FAD dependent oxidoreductase	18164086	GO:0055114//obsolete oxidation-reduction process;	-	GO:0050660//flavin adenine dinucleotide binding;GO:0050661//NADP binding;GO:0004499//N,N-dimethylaniline monooxygenase activity;	-
CCM_07851	95.3409	227.336	1.25366	0.0140349	0.104103	NW_006271974.1	GO:0046872;GO:0016491;GO:0055114	-	opiNOG32744;COG3491	RQ	sp|Q7LL04|YQK1_SCHPO UPF0676 protein C1494.01 OS=Schizosaccharomyces pombe (strain 972 / ATCC 24843) GN=SPCC1494.01 PE=3 SV=2	oxidoreductase	18169861	GO:0055114//obsolete oxidation-reduction process;	-	GO:0046872//metal ion binding;GO:0016491//oxidoreductase activity;	-
CCM_09245	234.142	509.585	1.12194	0.0142709	0.105446	NW_006271976.1	GO:0016021	-	opiNOG27902;sordNOG06417	S	-	hypothetical protein	18171248	-	GO:0016021//integral component of membrane;	-	-
CCM_04292	1520.14	6641.28	2.12726	0.0144485	0.106269	NW_006271971.1	GO:0016021	-	sordNOG04164;opiNOG13728	S	sp|Q12324|YVC1_YEAST Calcium channel YVC1 OS=Saccharomyces cerevisiae (strain ATCC 204508 / S288c) GN=YVC1 PE=1 SV=2	cation channel family transporter, putative	18166315	-	GO:0016021//integral component of membrane;	-	-
CCM_08686	1136.11	2929.23	1.36641	0.0145111	0.106323	NW_006271975.1	GO:0005975;GO:0016787	-	sordNOG05835;opiNOG14387;sorNOG01480	R	sp|Q7SFB0|GUS79_NEUCR Beta-glucuronidase OS=Neurospora crassa (strain ATCC 24698 / 74-OR23-1A / CBS 708.71 / DSM 1257 / FGSC 987) GN=NCU00937 PE=1 SV=1	hypothetical protein	18170692	GO:0005975//carbohydrate metabolic process;	-	GO:0016787//hydrolase activity;	-
CCM_07787	8.94119	69.7001	2.96262	0.0158412	0.112968	NW_006271974.1	GO:0030246	-	opiNOG62964;ascNOG26282	RO	-	Mannose-binding lectin	18169797	-	-	GO:0030246//carbohydrate binding;	-
CCM_07482	107.525	266.569	1.30983	0.0161098	0.113954	NW_006271974.1	-	-	opiNOG39817;sordNOG14667	S	-	hypothetical protein	18169493	-	-	-	-
CCM_04957	466.371	3361.32	2.84948	0.0161478	0.114055	NW_006271971.1	GO:0019836	-	sordNOG15189;opiNOG46950	RS	sp|Q00050|ASPH_ASPFU Asp-hemolysin OS=Neosartorya fumigata (strain ATCC MYA-4609 / Af293 / CBS 101355 / FGSC A1100) GN=AFUA_3G00590 PE=2 SV=2	Aegerolysin	18166977	GO:0019836//hemolysis by symbiont of host erythrocytes;	-	-	-
CCM_08256	2.66986	15.2638	2.51527	0.0163442	0.11502	NW_006271975.1	GO:0005975;GO:0004751	K01808	sordNOG12365	G	sp|A0QXE5|DERI1_MYCS2 D-erythrulose-4-phosphate isomerase 1 OS=Mycobacterium smegmatis (strain ATCC 700084 / mc(2)155) GN=derI1 PE=1 SV=1	ribose 5-phosphate isomerase	18170264	GO:0005975//carbohydrate metabolic process;	-	GO:0004751//ribose-5-phosphate isomerase activity;	ko00710(Carbon fixation in photosynthetic organisms);ko00051(Fructose and mannose metabolism);ko00030(Pentose phosphate pathway)
CCM_09555	407.456	1471.12	1.8522	0.0165592	0.115554	NW_006271977.1	-	-	-	-	-	hypothetical protein	18171557	-	-	-	-
CCM_02055	2722.69	9180.4	1.75353	0.0167024	0.116105	NW_006271970.1	GO:0008483	-	opiNOG54081;COG3320;COG0520	QEI	sp|B8NM72|USTD_ASPFN Cysteine desulfurase-like protein ustD OS=Aspergillus flavus (strain ATCC 200026 / FGSC A1120 / NRRL 3357 / JCM 12722 / SRRC 167) GN=ustD PE=1 SV=1	NRPS-like enzyme, putative	18164084	-	-	GO:0008483//transaminase activity;	-
CCM_03055	5.01033	20.4744	2.03084	0.0167693	0.116225	NW_006271970.1	GO:0030170;GO:0006520;GO:0016765	K17069	opiNOG00778;sorNOG02598;opiNOG52000;COG2873	E	sp|P50125|CYSD_EMENI Homocysteine synthase OS=Emericella nidulans (strain FGSC A4 / ATCC 38163 / CBS 112.46 / NRRL 194 / M139) GN=cysD PE=1 SV=2	O-acetylhomoserine/O-acetylserine sulfhydrylase	18165082	GO:0006520//cellular amino acid metabolic process;	-	GO:0030170//pyridoxal phosphate binding;GO:0016765//transferase activity, transferring alkyl or aryl (other than methyl) groups;	ko00920(Sulfur metabolism);ko00270(Cysteine and methionine metabolism)
CCM_04642	1971.62	4869.61	1.30442	0.017133	0.117811	NW_006271971.1	GO:0016021	-	opiNOG24326	S	-	hypothetical protein	18166664	-	GO:0016021//integral component of membrane;	-	-
CCM_06586	272.983	1032.35	1.91905	0.0172291	0.118086	NW_006271973.1	GO:0006508;GO:0004185	-	sordNOG06862	EO	sp|P34946|CPS1_PENJA Carboxypeptidase S1 OS=Penicillium janthinellum PE=1 SV=1	carboxypeptidase S1, putative	18168600	GO:0006508//proteolysis;	-	GO:0004185//serine-type carboxypeptidase activity;	-
CCM_04020	32.1703	85.7052	1.41366	0.0172918	0.118226	NW_006271971.1	GO:0051213;GO:0055114	-	sorNOG01420;NOG52517;opiNOG58813	SR	sp|P37479|YYCE_BACSU Uncharacterized protein YycE OS=Bacillus subtilis (strain 168) GN=yycE PE=1 SV=1	Glyoxalase/bleomycin resistance protein/dioxygenase	18166043	GO:0055114//obsolete oxidation-reduction process;	-	GO:0051213//dioxygenase activity;	-
CCM_08190	42.4958	85.9105	1.01552	0.0177672	0.119872	NW_006271974.1	-	-	sordNOG14753;opiNOG19367;hypNOG06320	RGS	-	hypothetical protein	18170199	-	-	-	-
CCM_04607	734.734	2860.13	1.96079	0.0181812	0.121541	NW_006271971.1	GO:0003824	K09704	sordNOG09664	S	sp|Q10449|MU157_SCHPO Meiotically up-regulated gene 157 protein OS=Schizosaccharomyces pombe (strain 972 / ATCC 24843) GN=mug157 PE=1 SV=1	hypothetical protein	18166630	-	-	GO:0003824//catalytic activity;	-
CCM_08632	1.67737	135.915	6.34036	0.0184685	0.122628	NW_006271975.1	GO:0006633;GO:0005506;GO:0016021;GO:0055114;GO:0016491	K00227	COG3000;opiNOG04506;opiNOG57412	I	sp|Q8J207|ERG3_LEPMC Delta(7)-sterol 5(6)-desaturase OS=Leptosphaeria maculans GN=ERG3 PE=3 SV=1	ABC transporter, putative	18170638	GO:0006633//fatty acid biosynthetic process;GO:0055114//obsolete oxidation-reduction process;	GO:0016021//integral component of membrane;	GO:0005506//iron ion binding;GO:0016491//oxidoreductase activity;	ko00100(Steroid biosynthesis)
CCM_06511	1570.03	4272.01	1.44413	0.0185535	0.123004	NW_006271973.1	-	-	sordNOG12528	S	-	hypothetical protein	18168525	-	-	-	-
CCM_08679	297.053	648.217	1.12575	0.0189016	0.12488	NW_006271975.1	GO:0016021	-	opiNOG02845;opiNOG21032;NOG42379	S	-	hypothetical protein	18170685	-	GO:0016021//integral component of membrane;	-	-
CCM_06510	756.446	3651.58	2.27121	0.0192847	0.126094	NW_006271973.1	GO:0016301;GO:0016310	-	pleNOG06185;opiNOG32515	R	-	Protein kinase-like domain	18168524	GO:0016310//phosphorylation;	-	GO:0016301//kinase activity;	-
CCM_01786	873	2193.9	1.32944	0.0192951	0.126094	NW_006271969.1	GO:0003677	-	opiNOG15551;hypNOG00537;opiNOG71414	S	-	Homeodomain-like protein	18163816	-	-	GO:0003677//DNA binding;	-
CCM_04302	20.3543	51.6296	1.34286	0.0193577	0.126327	NW_006271971.1	-	-	opiNOG11343;COG1028	IQ	-	oxidoreductase, short chain dehydrogenase/reductase family	18166325	-	-	-	-
CCM_02056	3781.11	12737.1	1.75215	0.0198477	0.128137	NW_006271970.1	GO:0004499;GO:0050661;GO:0050660;GO:0055114	-	opiNOG11408;COG2072	PQ	sp|B8NM73|USTF2_ASPFN Flavin-containing monooxygenase ustF2 OS=Aspergillus flavus (strain ATCC 200026 / FGSC A1120 / NRRL 3357 / JCM 12722 / SRRC 167) GN=ustF2 PE=1 SV=1	dimethylaniline monooxygenase, putative	18164085	GO:0055114//obsolete oxidation-reduction process;	-	GO:0004499//N,N-dimethylaniline monooxygenase activity;GO:0050661//NADP binding;GO:0050660//flavin adenine dinucleotide binding;	-
CCM_02062	1770.9	4886.85	1.46442	0.0199075	0.128383	NW_006271970.1	GO:0008270;GO:0006357;GO:0000981;GO:0005634	-	opiNOG54677;sorNOG06000	S	sp|B8NM76|USTR_ASPFN ustiloxin B cluster transcription factor ustR OS=Aspergillus flavus (strain ATCC 200026 / FGSC A1120 / NRRL 3357 / JCM 12722 / SRRC 167) GN=ustR PE=3 SV=2	C6 transcription factor, putative	18164091	GO:0006357//regulation of transcription by RNA polymerase II;	GO:0005634//nucleus;	GO:0008270//zinc ion binding;GO:0000981//DNA-binding transcription factor activity, RNA polymerase II-specific;	-
CCM_08733	1592.5	3984.83	1.32323	0.0203813	0.130097	NW_006271975.1	GO:0005509;GO:0004571;GO:0016020;GO:0008152	K01230	sorNOG01866;sordNOG07682	G	sp|Q0D076|MNS1B_ASPTN Probable mannosyl-oligosaccharide alpha-1,2-mannosidase 1B OS=Aspergillus terreus (strain NIH 2624 / FGSC A1156) GN=mns1B PE=3 SV=1	mannosidase MsdS	18170738	GO:0008152//metabolic process;	GO:0016020//membrane;	GO:0005509//calcium ion binding;GO:0004571//mannosyl-oligosaccharide 1,2-alpha-mannosidase activity;	ko04141(Protein processing in endoplasmic reticulum);ko00513(Various types of N-glycan biosynthesis);ko00510(N-Glycan biosynthesis)
CCM_09198	627.598	3087.98	2.29875	0.0208953	0.132323	NW_006271976.1	GO:0055114;GO:0016491;GO:0016021	-	opiNOG07845;sordNOG08325;COG0665	ER	sp|O43029|FAP1_SCHPO L-pipecolate oxidase OS=Schizosaccharomyces pombe (strain 972 / ATCC 24843) GN=fap1 PE=1 SV=1	sarcosine oxidase, putative	18171201	GO:0055114//obsolete oxidation-reduction process;	GO:0016021//integral component of membrane;	GO:0016491//oxidoreductase activity;	-
CCM_05331	5721.02	15738.8	1.45998	0.0211418	0.133766	NW_006271972.1	GO:0055114;GO:0008199;GO:0018576;GO:0009712	K03381	sordNOG11311	E	sp|P86029|HQD2_CANAL Catechol 1,2-dioxygenase OS=Candida albicans (strain SC5314 / ATCC MYA-2876) GN=HQD2 PE=1 SV=1	Intradiol ring-cleavage dioxygenase, core	18167349	GO:0055114//obsolete oxidation-reduction process;GO:0009712//catechol-containing compound metabolic process;	-	GO:0008199//ferric iron binding;GO:0018576//catechol 1,2-dioxygenase activity;	ko00623(Toluene degradation);ko00364(Fluorobenzoate degradation);ko00362(Benzoate degradation);ko00361(Chlorocyclohexane and chlorobenzene degradation)
CCM_02067	597.982	1482.39	1.30975	0.0213324	0.134305	NW_006271970.1	GO:0016021;GO:0016757	K03843	sordNOG11557	M	sp|Q8X0H8|ALG2_NEUCR Alpha-1,3/1,6-mannosyltransferase alg-2 OS=Neurospora crassa (strain ATCC 24698 / 74-OR23-1A / CBS 708.71 / DSM 1257 / FGSC 987) GN=alg-2 PE=3 SV=1	mannosyltransferase	18164096	-	GO:0016021//integral component of membrane;	GO:0016757//glycosyltransferase activity;	ko00513(Various types of N-glycan biosynthesis);ko00510(N-Glycan biosynthesis)
CCM_00791	226.547	7416.92	5.03294	0.0213411	0.134305	NW_006271969.1	GO:0030245;GO:0008422;GO:0102483	K05349	sordNOG06647;sordNOG09567	G	sp|A5ABF5|BGLM_ASPNC Probable beta-glucosidase M OS=Aspergillus niger (strain CBS 513.88 / FGSC A1513) GN=bglM PE=3 SV=1	glycosyl hydrolase, putative	18162825	GO:0030245//cellulose catabolic process;	-	GO:0008422//beta-glucosidase activity;GO:0102483//scopolin beta-glucosidase activity;	ko00940(Phenylpropanoid biosynthesis);ko00500(Starch and sucrose metabolism);ko00460(Cyanoamino acid metabolism)
CCM_07930	16.3841	47.0303	1.5213	0.0221833	0.137817	NW_006271974.1	GO:0008152;GO:0016874	K18660	onyNOG06323;opiNOG51124	I	sp|Q8H151|AAE13_ARATH Malonate--CoA ligase OS=Arabidopsis thaliana GN=AAE13 PE=1 SV=1	AMP-dependent synthetase/ligase	18169940	GO:0008152//metabolic process;	-	GO:0016874//ligase activity;	ko00280(Valine, leucine and isoleucine degradation);ko00061(Fatty acid biosynthesis)
CCM_00119	28.2697	61.2857	1.11629	0.0225428	0.139655	NW_006271969.1	GO:0016021;GO:0055085;GO:0005215	-	opiNOG57293;sordNOG07503;necNOG08850;opiNOG13559	R	sp|P40474|QDR2_YEAST Quinidine resistance protein 2 OS=Saccharomyces cerevisiae (strain ATCC 204508 / S288c) GN=QDR2 PE=1 SV=1	Major facilitator superfamily transporter	18162154	GO:0055085//transmembrane transport;	GO:0016021//integral component of membrane;	GO:0005215//transporter activity;	-
CCM_01284	240.261	821.962	1.77447	0.0229022	0.141128	NW_006271969.1	GO:0008152;GO:0016874	-	opiNOG56022;pleNOG06872	RI	sp|Q5BA81|EASD_EMENI Acyl-CoA ligase easD OS=Emericella nidulans (strain FGSC A4 / ATCC 38163 / CBS 112.46 / NRRL 194 / M139) GN=easD PE=3 SV=1	AMP dependent CoA ligase, putative	18163315	GO:0008152//metabolic process;	-	GO:0016874//ligase activity;	-
CCM_01846	29.7843	62.7477	1.07501	0.0232649	0.14254	NW_006271969.1	-	-	-	-	-	hypothetical protein	18163875	-	-	-	-
CCM_09179	13.2815	39.7022	1.5798	0.0236308	0.143592	NW_006271976.1	GO:0016021;GO:0006032;GO:0004568;GO:0005975	-	sordNOG10373;opiNOG18919	G	sp|P09805|KTXA_KLULA Killer toxin subunits alpha/beta OS=Kluyveromyces lactis (strain ATCC 8585 / CBS 2359 / DSM 70799 / NBRC 1267 / NRRL Y-1140 / WM37) PE=1 SV=1	glycosyl hydrolase, family 18, putative	18171182	GO:0006032//chitin catabolic process;GO:0005975//carbohydrate metabolic process;	GO:0016021//integral component of membrane;	GO:0004568//chitinase activity;	-
CCM_00591	34.5765	69.888	1.01525	0.0237943	0.144312	NW_006271969.1	GO:0006629;GO:0008081	-	opiNOG20338;opiNOG36632;sordNOG07477	SR	-	LysM domain-containing protein	18162626	GO:0006629//lipid metabolic process;	-	GO:0008081//phosphoric diester hydrolase activity;	-
CCM_00880	32.0199	66.0164	1.04385	0.0248087	0.149147	NW_006271969.1	GO:0055085;GO:0016020;GO:0015116;GO:0008272	-	sordNOG14118;opiNOG33475;sorNOG05408	SR	-	Cyclin-like F-box	18162914	GO:0055085//transmembrane transport;GO:0008272//sulfate transport;	GO:0016020//membrane;	GO:0015116//sulfate transmembrane transporter activity;	-
CCM_06065	902.493	2258.53	1.3234	0.0254574	0.151193	NW_006271972.1	GO:0004499;GO:0055114;GO:0050660;GO:0050661	-	sordNOG10005;opiNOG21791	R	sp|D2E9W9|DEP4_ALTBR FAD-dependent monooxygenase DEP4 OS=Alternaria brassicicola GN=DEP4 PE=2 SV=1	hypothetical protein	18168080	GO:0055114//obsolete oxidation-reduction process;	-	GO:0004499//N,N-dimethylaniline monooxygenase activity;GO:0050660//flavin adenine dinucleotide binding;GO:0050661//NADP binding;	-
CCM_09519	93.3987	367.693	1.97703	0.0272699	0.158073	NW_006271977.1	-	-	-	-	-	hypothetical protein	18171521	-	-	-	-
CCM_06243	9.63335	46.1366	2.2598	0.0276148	0.159245	NW_006271972.1	-	-	-	-	-	hypothetical protein	18168258	-	-	-	-
CCM_01528	43.6182	106.551	1.28855	0.0287693	0.163839	NW_006271969.1	GO:0016021	-	opiNOG11343;sorNOG07567	Q	sp|Q48436|BUDC_KLEPN Diacetyl reductase [(S)-acetoin forming] OS=Klebsiella pneumoniae GN=budC PE=1 SV=2	short chain dehydrogenase	18163559	-	GO:0016021//integral component of membrane;	-	-
CCM_08665	15.3722	37.5239	1.28748	0.0295913	0.166585	NW_006271975.1	-	-	sordNOG09106;opiNOG29072	R	-	extracellular protein	18170671	-	-	-	-
CCM_01283	55.2347	256.503	2.21533	0.0297377	0.167174	NW_006271969.1	GO:0016747	K19747	sordNOG13270;opiNOG45029	S	sp|C8VPT2|EASC_EMENI Acyltransferase easC OS=Emericella nidulans (strain FGSC A4 / ATCC 38163 / CBS 112.46 / NRRL 194 / M139) GN=easC PE=3 SV=1	Transferase	18163314	-	-	GO:0016747//acyltransferase activity, transferring groups other than amino-acyl groups;	-
CCM_01058	575.376	1170.75	1.02485	0.029786	0.167206	NW_006271969.1	-	-	-	-	-	hypothetical protein	18163091	-	-	-	-
CCM_08642	29.0909	67.3375	1.21084	0.0299991	0.167957	NW_006271975.1	-	-	opiNOG59911;hypNOG02858;necNOG12757	R	-	endoribonuclease L-PSP family protein	18170648	-	-	-	-
CCM_02060	13259.8	35678.9	1.42802	0.030378	0.16925	NW_006271970.1	-	-	opiNOG35974;sorNOG08110	S	sp|B8NM67|USTYA_ASPFN Oxidase ustYa OS=Aspergillus flavus (strain ATCC 200026 / FGSC A1120 / NRRL 3357 / JCM 12722 / SRRC 167) GN=ustYa PE=1 SV=1	hypothetical protein	18164089	-	-	-	-
CCM_09617	735.35	1539.88	1.06631	0.0310256	0.171068	NW_006271978.1	GO:0008270;GO:0003712;GO:0000821;GO:0006357;GO:0045955;GO:0000981;GO:0005634	K09246	opiNOG54295;eurotNOG10758	S	-	C6 transcription factor	18171619	GO:0000821//regulation of arginine metabolic process;GO:0006357//regulation of transcription by RNA polymerase II;GO:0045955//negative regulation of calcium ion-dependent exocytosis;	GO:0005634//nucleus;	GO:0008270//zinc ion binding;GO:0003712//transcription coregulator activity;GO:0000981//DNA-binding transcription factor activity, RNA polymerase II-specific;	-
CCM_07934	4016.36	16837.8	2.06774	0.0324248	0.176507	NW_006271974.1	GO:0016021;GO:0055085	K03448	opiNOG17144	G	sp|O43000|LIZ1_SCHPO Pantothenate transporter liz1 OS=Schizosaccharomyces pombe (strain 972 / ATCC 24843) GN=liz1 PE=2 SV=2	pantothenate transporter, putative	18169944	GO:0055085//transmembrane transport;	GO:0016021//integral component of membrane;	-	-
CCM_07898	23.3548	51.8282	1.15002	0.032426	0.176507	NW_006271974.1	-	-	-	-	-	hypothetical protein	18169908	-	-	-	-
CCM_05065	53.261	173.257	1.70177	0.0327505	0.177404	NW_006271972.1	GO:0003993;GO:0016311	-	opiNOG03722;opiNOG51811	R	sp|O00107|PHYA_THIHE 3-phytase A OS=Thielavia heterothallica GN=PHYA PE=1 SV=1	phytase, putative	18167085	GO:0016311//dephosphorylation;	-	GO:0003993//acid phosphatase activity;	-
CCM_02797	0.654589	7.97814	3.60739	0.0335806	0.180442	NW_006271970.1	GO:0004252;GO:0006508	K01279	opiNOG14582;pleNOG00912	O	sp|C5FRX4|SED4_ARTOC Tripeptidyl-peptidase SED4 OS=Arthroderma otae (strain ATCC MYA-4605 / CBS 113480) GN=SED4 PE=3 SV=1	family S53 protease-like protein	18164824	GO:0006508//proteolysis;	-	GO:0004252//serine-type endopeptidase activity;	ko04142(Lysosome)
CCM_08500	25.865	59.09	1.19191	0.0337307	0.180844	NW_006271975.1	-	-	opiNOG44641;necNOG12242;hypNOG03213;sordNOG14015	R	-	hypothetical protein	18170507	-	-	-	-
CCM_05423	1498.93	3454.61	1.20459	0.0348279	0.18528	NW_006271972.1	GO:0008152;GO:0003824	-	onyNOG06396;COG0318;NOG12813	I	sp|G3XMC0|AZAF_ASPNA Acyl-CoA ligase azaF OS=Aspergillus niger (strain ATCC 1015 / CBS 113.46 / FGSC A1144 / LSHB Ac4 / NCTC 3858a / NRRL 328 / USDA 3528.7) GN=azaF PE=2 SV=1	AMP-binding enzyme, putative	18167441	GO:0008152//metabolic process;	-	GO:0003824//catalytic activity;	-
CCM_01734	733.169	1549.98	1.08003	0.0352424	0.186659	NW_006271969.1	GO:0052591;GO:0055114;GO:0006072;GO:0009331	K00111	COG0578;opiNOG04524	C	sp|A7DZP8|GPDM_MESAU Glycerol-3-phosphate dehydrogenase, mitochondrial OS=Mesocricetus auratus GN=GPD2 PE=1 SV=1	glycerol-3-phosphate dehydrogenase	18163764	GO:0055114//obsolete oxidation-reduction process;GO:0006072//glycerol-3-phosphate metabolic process;	GO:0009331//glycerol-3-phosphate dehydrogenase complex;	GO:0052591//sn-glycerol-3-phosphate:ubiquinone-8 oxidoreductase activity;	ko00564(Glycerophospholipid metabolism)
CCM_09154	50.1868	104.989	1.06486	0.0380088	0.196253	NW_006271976.1	-	-	sordNOG06658;opiNOG22526	S	sp|Q0TVF9|ALG3_PHANO Dol-P-Man:Man(5)GlcNAc(2)-PP-Dol alpha-1,3-mannosyltransferase OS=Phaeosphaeria nodorum (strain SN15 / ATCC MYA-4574 / FGSC 10173) GN=ALG3 PE=3 SV=2	hypothetical protein	18171157	-	-	-	-
CCM_08319	197.27	538.712	1.44934	0.0396602	0.201189	NW_006271975.1	GO:0055114;GO:0008270;GO:0016491	-	sordNOG06526;sorNOG04565;opiNOG14722	SR	sp|Q0MVN8|QOR_PIG Quinone oxidoreductase OS=Sus scrofa GN=CRYZ PE=2 SV=1	oxidoreductase, zinc-binding dehydrogenase family, putative	18170327	GO:0055114//obsolete oxidation-reduction process;	-	GO:0008270//zinc ion binding;GO:0016491//oxidoreductase activity;	-
CCM_05682	848.098	2712.91	1.67754	0.0403524	0.202859	NW_006271972.1	GO:0016810	-	opiNOG19224;sordNOG09224	R	sp|A5D1G6|MTAD_PELTS 5-methylthioadenosine/S-adenosylhomocysteine deaminase OS=Pelotomaculum thermopropionicum (strain DSM 13744 / JCM 10971 / SI) GN=mtaD PE=3 SV=1	amidohydrolase family protein	18167700	-	-	GO:0016810//hydrolase activity, acting on carbon-nitrogen (but not peptide) bonds;	-
CCM_00265	11.3507	29.8456	1.39473	0.0405129	0.202944	NW_006271969.1	-	-	-	-	-	hypothetical protein	18162300	-	-	-	-
CCM_06186	34.094	104.553	1.61665	0.0429981	0.211211	NW_006271972.1	GO:0016021;GO:0016787;GO:0008152	K08095	opiNOG22988;magNOG10286;sordNOG06981	R	sp|A1C9G0|CUTI3_ASPCL Probable cutinase 3 OS=Aspergillus clavatus (strain ATCC 1007 / CBS 513.65 / DSM 816 / NCTC 3887 / NRRL 1) GN=ACLA_055320 PE=3 SV=1	cutinase, putative	18168201	GO:0008152//metabolic process;	GO:0016021//integral component of membrane;	GO:0016787//hydrolase activity;	-
CCM_08589	11.7283	29.463	1.32891	0.0433514	0.212404	NW_006271975.1	GO:0055085;GO:0016021	-	opiNOG07079	R	sp|O94343|YHMA_SCHPO Uncharacterized MFS-type transporter C1271.10c OS=Schizosaccharomyces pombe (strain 972 / ATCC 24843) GN=SPBC1271.10c PE=1 SV=1	Major facilitator superfamily transporter	18170595	GO:0055085//transmembrane transport;	GO:0016021//integral component of membrane;	-	-
CCM_04606	280.327	1106.24	1.98049	0.0441928	0.215035	NW_006271971.1	GO:0016021	-	opiNOG07754;sordNOG09236	S	sp|A7KAK4|ATG22_PICAN Autophagy-related protein 22 OS=Pichia angusta GN=ATG22 PE=3 SV=1	autophagy protein (Atg22), putative	18166629	-	GO:0016021//integral component of membrane;	-	-
CCM_01417	2577.42	5563.49	1.11006	0.045691	0.21971	NW_006271969.1	GO:0003824;GO:0030246;GO:0005975	-	sordNOG07749;opiNOG11611	R	sp|D4ATR3|A7629_ARTBC Uncharacterized secreted glycosidase ARB_07629 OS=Arthroderma benhamiae (strain ATCC MYA-4681 / CBS 112371) GN=ARB_07629 PE=1 SV=1	alpha-1,2-mannosidase, putative subfamily	18163448	GO:0005975//carbohydrate metabolic process;	-	GO:0003824//catalytic activity;GO:0030246//carbohydrate binding;	-
CCM_05119	667.102	3213.04	2.26796	0.0474895	0.22493	NW_006271972.1	GO:0055114;GO:0016491;GO:0019825;GO:0020037	K05916	sordNOG06819;opiNOG05259	C	sp|Q7TTP0|HMP_BORPE Flavohemoprotein OS=Bordetella pertussis (strain Tohama I / ATCC BAA-589 / NCTC 13251) GN=hmp PE=3 SV=1	flavohemoprotein	18167139	GO:0055114//obsolete oxidation-reduction process;	-	GO:0016491//oxidoreductase activity;GO:0019825//oxygen binding;GO:0020037//heme binding;	-
CCM_02061	4555.02	12625.8	1.47085	0.0477765	0.225744	NW_006271970.1	GO:0055114;GO:0004497;GO:0005506;GO:0020037;GO:0016705	-	KOG0157;opiNOG19202;COG2124;sordNOG11746	Q	sp|B8NM64|USTC_ASPFN Cytochrome P450 monooxygenase ustC OS=Aspergillus flavus (strain ATCC 200026 / FGSC A1120 / NRRL 3357 / JCM 12722 / SRRC 167) GN=ustC PE=1 SV=1	Cytochrome P450	18164090	GO:0055114//obsolete oxidation-reduction process;	-	GO:0004497//monooxygenase activity;GO:0005506//iron ion binding;GO:0020037//heme binding;GO:0016705//oxidoreductase activity, acting on paired donors, with incorporation or reduction of molecular oxygen;	-
CCM_05883	15.9868	36.1029	1.17523	0.0481751	0.227125	NW_006271972.1	-	-	sorNOG07939;opiNOG24886;sordNOG08554	RL	-	hypothetical protein	18167901	-	-	-	-
CCM_09192	42.0112	111.761	1.41157	0.0487424	0.229462	NW_006271976.1	-	-	opiNOG35785;opiNOG43706;pleNOG05359	S	sp|Q9CWV6|PKRI1_MOUSE PRKR-interacting protein 1 OS=Mus musculus GN=Prkrip1 PE=1 SV=2	DUF1168 domain protein	18171195	-	-	-	-
CCM_00140	399.494	950.244	1.25012	0.0496104	0.23179	NW_006271969.1	-	-	sordNOG05851;opiNOG01450;COG0235	TGZ	sp|Q9P5M9|MUG14_SCHPO Meiotically up-regulated gene 14 protein OS=Schizosaccharomyces pombe (strain 972 / ATCC 24843) GN=mug14 PE=1 SV=1	aldolase	18162175	-	-	-	-
