# Supplementary material for: Genome resequencing and transcriptome analysis reveal the molecular mechanism of albinism in Cordyceps militaris
Source: Front Microbiol. 2023 Apr 11;14:1153153. doi: 10.3389/fmicb.2023.1153153 (PMC10126257; doi:10.3389/fmicb.2023.1153153)
Supplement: Supplementary file 12 [file Table_12.XLSX]

## Sheet: Sheet1
Table S12. Differentially expressed genes in the AlbL compared with WTL. WTL, wild type after light treatment; AlbL, albino mutation after light treatment.
Gene ID	BaseMean		log2FoldChange	pval	padj	Chromosome	GO	KEGG	eggNOG	eggNOG_Class	Swissprot	NR	Entrez_geneID	BP	CC	MF	Pathway
	WTL	AlbL
CCM_09196	2422.6	0	-Inf	3.34088e-113	3.21559e-109	NW_006271976.1	-	-	opiNOG43873;sordNOG14513	S	-	hypothetical protein	18171199	-	-	-	-
CCM_09194	328.492	0	-Inf	1.04191e-54	5.01418e-51	NW_006271976.1	GO:0003676	-	necNOG13927;pleNOG01151	S	-	hypothetical protein	18171197	-	-	GO:0003676//nucleic acid binding;	-
CCM_09195	269.415	0	-Inf	2.85248e-40	9.15171e-37	NW_006271976.1	-	-	-	-	-	hypothetical protein	18171198	-	-	-	-
CCM_00780	1327.17	241.901	-2.45586	2.47455e-11	2.16523e-08	NW_006271969.1	GO:0006508;GO:0016021;GO:0004190	-	opiNOG49046;NOG132913	OS	sp|C4YMJ3|CARP2_CANAW Candidapepsin-2 OS=Candida albicans (strain WO-1) GN=SAP2 PE=1 SV=1	candidapepsin-4 precursor	18162814	GO:0006508//proteolysis;	GO:0016021//integral component of membrane;	GO:0004190//aspartic-type endopeptidase activity;	-
CCM_08407	74.518	6.59059	-3.49911	8.14569e-11	6.53352e-08	NW_006271975.1	-	-	-	-	-	hypothetical protein	18170415	-	-	-	-
CCM_06027	442.162	72.1667	-2.61517	5.94686e-10	3.8159e-07	NW_006271972.1	GO:0016021;GO:0055085	-	eurotNOG10989;pleNOG02649;NOG129109;opiNOG49406	RG	sp|B8NM75|USTT_ASPFN Efflux pump ustT OS=Aspergillus flavus (strain ATCC 200026 / FGSC A1120 / NRRL 3357 / JCM 12722 / SRRC 167) GN=ustT PE=3 SV=1	MFS transporter, putative	18168045	GO:0055085//transmembrane transport;	GO:0016021//integral component of membrane;	-	-
CCM_09076	15628.9	4981.55	-1.64955	9.02844e-10	5.15821e-07	NW_006271975.1	GO:0015398;GO:0015200;GO:0001403;GO:0072489;GO:0005794;GO:0016021	K03320	sordNOG10713	P	sp|Q9C0V1|AMT1_SCHPO Ammonium transporter 1 OS=Schizosaccharomyces pombe (strain 972 / ATCC 24843) GN=amt1 PE=3 SV=1	ammonium transporter MEP2	18171079	GO:0001403//invasive growth in response to glucose limitation;GO:0072489//methylammonium transmembrane transport;	GO:0005794//Golgi apparatus;GO:0016021//integral component of membrane;	GO:0015398//high-affinity secondary active ammonium transmembrane transporter activity;GO:0015200//methylammonium transmembrane transporter activity;	-
CCM_04606	273.699	69.4423	-1.9787	4.24642e-09	1.77704e-06	NW_006271971.1	GO:0016021	-	opiNOG07754;sordNOG09236	S	sp|A7KAK4|ATG22_PICAN Autophagy-related protein 22 OS=Pichia angusta GN=ATG22 PE=3 SV=1	autophagy protein (Atg22), putative	18166629	-	GO:0016021//integral component of membrane;	-	-
CCM_06869	133.049	21.3113	-2.64226	1.32884e-08	4.91925e-06	NW_006271973.1	GO:0016021;GO:0006798;GO:0000298;GO:0000329;GO:0005634;GO:0004309	K06018	sordNOG07890;opiNOG02001	I	sp|Q9P3S1|PPN1_NEUCR Endopolyphosphatase OS=Neurospora crassa (strain ATCC 24698 / 74-OR23-1A / CBS 708.71 / DSM 1257 / FGSC 987) GN=epp-1 PE=3 SV=3	endopolyphosphatase	18168880	GO:0006798//polyphosphate catabolic process;	GO:0016021//integral component of membrane;GO:0000329//fungal-type vacuole membrane;GO:0005634//nucleus;	GO:0000298//endopolyphosphatase activity;GO:0004309//exopolyphosphatase activity;	-
CCM_09009	167.252	40.8151	-2.03485	2.5345e-08	7.86922e-06	NW_006271975.1	GO:0046872;GO:0008233;GO:0006508	K05994	sordNOG07797;opiNOG22721	PO	sp|Q2H1T8|LAP1_CHAGB Leucine aminopeptidase 1 OS=Chaetomium globosum (strain ATCC 6205 / CBS 148.51 / DSM 1962 / NBRC 6347 / NRRL 1970) GN=LAP1 PE=3 SV=1	peptidase	18171013	GO:0006508//proteolysis;	-	GO:0046872//metal ion binding;GO:0008233//peptidase activity;	-
CCM_06895	1764.92	615.745	-1.51919	3.32605e-08	9.70098e-06	NW_006271973.1	GO:0016813;GO:0008152	-	opiNOG12182	E	sp|Q6DTN4|HYUC_RHIML N-carbamoyl-L-amino-acid hydrolase OS=Rhizobium meliloti GN=hyuC PE=1 SV=1	hydantoin utilization protein C, putative	18168906	GO:0008152//metabolic process;	-	GO:0016813//hydrolase activity, acting on carbon-nitrogen (but not peptide) bonds, in linear amidines;	-
CCM_08992	311.168	94.0971	-1.72547	5.67668e-08	1.53128e-05	NW_006271975.1	-	-	opiNOG46179	S	-	hypothetical protein	18170996	-	-	-	-
CCM_02025	1768.52	267.33	-2.72585	5.7274e-08	1.53128e-05	NW_006271970.1	-	-	sordNOG14185	S	-	hypothetical protein	18164054	-	-	-	-
CCM_03619	958.428	325.842	-1.5565	6.12772e-08	1.59403e-05	NW_006271971.1	GO:0046872;GO:0005524;GO:0008716	-	eurotNOG08463;opiNOG16095;opiNOG04314	SR	sp|Q4WD45|FMPC_ASPFU Fumipyrrole biosynthesis protein C OS=Neosartorya fumigata (strain ATCC MYA-4609 / Af293 / CBS 101355 / FGSC A1100) GN=fmpC PE=2 SV=1	ATP-grasp fold domain containing protein	18165645	-	-	GO:0046872//metal ion binding;GO:0005524//ATP binding;GO:0008716//D-alanine-D-alanine ligase activity;	-
CCM_06743	2944.58	753.087	-1.96717	8.32123e-08	1.95346e-05	NW_006271973.1	GO:0032991;GO:1901363;GO:0006261;GO:0097159;GO:0031981;GO:0016021	-	sordNOG10345	S	-	hypothetical protein	18168756	GO:0006261//DNA-dependent DNA replication;	GO:0032991//protein-containing complex;GO:0031981//nuclear lumen;GO:0016021//integral component of membrane;	GO:1901363//heterocyclic compound binding;GO:0097159//organic cyclic compound binding;	-
CCM_04659	218.485	66.8892	-1.70769	4.45238e-07	8.74576e-05	NW_006271971.1	GO:0016705;GO:0020037;GO:0005506;GO:0004497;GO:0016021;GO:0055114	-	sordNOG09016;opiNOG24252	Q	sp|Q9Y758|CP52M_DEBHN Cytochrome P450 52A13 OS=Debaryomyces hansenii GN=CYP52A13 PE=2 SV=1	cytochrome P450 alkane hydroxylase	18166681	GO:0055114//obsolete oxidation-reduction process;	GO:0016021//integral component of membrane;	GO:0016705//oxidoreductase activity, acting on paired donors, with incorporation or reduction of molecular oxygen;GO:0020037//heme binding;GO:0005506//iron ion binding;GO:0004497//monooxygenase activity;	-
CCM_01942	623.056	125.717	-2.30919	5.10835e-07	9.83357e-05	NW_006271970.1	GO:0016491;GO:0008270;GO:0055114	-	sordNOG10195;opiNOG06785	CQ	sp|P54006|TOXD_COCCA Protein TOXD OS=Cochliobolus carbonum GN=TOXD PE=3 SV=1	alcohol dehydrogenase, putative	18163971	GO:0055114//obsolete oxidation-reduction process;	-	GO:0016491//oxidoreductase activity;GO:0008270//zinc ion binding;	-
CCM_07766	2952.1	1153.31	-1.35596	5.40355e-07	0.000100018	NW_006271974.1	GO:0005215;GO:0016021;GO:0006857	K03305	opiNOG04140;sordNOG06484	EP	sp|Q9P380|PTR2_SCHPO Probable peptide transporter ptr2 OS=Schizosaccharomyces pombe (strain 972 / ATCC 24843) GN=ptr2 PE=1 SV=1	oligopeptide transporter	18169776	GO:0006857//oligopeptide transport;	GO:0016021//integral component of membrane;	GO:0005215//transporter activity;	-
CCM_07220	2130.52	769.074	-1.47001	5.96065e-07	0.00010329	NW_006271973.1	GO:0016021	-	hypNOG02077;sordNOG15658;necNOG09781;sordNOG12362	SR	-	hypothetical protein	18169231	-	GO:0016021//integral component of membrane;	-	-
CCM_02093	1613.68	594.817	-1.43983	8.60759e-07	0.00013808	NW_006271970.1	-	-	opiNOG47220	R	-	hypothetical protein	18164122	-	-	-	-
CCM_09321	414.192	146.942	-1.49505	9.14562e-07	0.000144033	NW_006271976.1	-	-	-	-	-	hypothetical protein	18171324	-	-	-	-
CCM_09193	7692.06	3137.89	-1.29357	1.26778e-06	0.000190663	NW_006271976.1	GO:0005634;GO:0051082;GO:0005832;GO:0006457;GO:0005524	K09495	opiNOG02081;sordNOG09218	O	sp|O74341|TCPG_SCHPO T-complex protein 1 subunit gamma OS=Schizosaccharomyces pombe (strain 972 / ATCC 24843) GN=cct3 PE=1 SV=1	T-complex protein 1 subunit gamma	18171196	GO:0006457//protein folding;	GO:0005634//nucleus;GO:0005832//chaperonin-containing T-complex;	GO:0051082//unfolded protein binding;GO:0005524//ATP binding;	-
CCM_06045	26110.4	10780.4	-1.27622	1.47154e-06	0.000213789	NW_006271972.1	GO:0055085;GO:0016021	-	sordNOG05921;sorNOG00625;opiNOG52830	T	sp|P40900|ISP4_SCHPO Sexual differentiation process protein isp4 OS=Schizosaccharomyces pombe (strain 972 / ATCC 24843) GN=isp4 PE=2 SV=2	Tetrapeptide transporter, OPT1/isp4	18168062	GO:0055085//transmembrane transport;	GO:0016021//integral component of membrane;	-	-
CCM_05419	167.494	40.9563	-2.03195	1.48819e-06	0.000213789	NW_006271972.1	GO:0008237;GO:0006508	-	opiNOG11422;sorNOG03848	WO	sp|Q871C5|MEP1_NEUCR Extracellular metalloprotease NCU07200 OS=Neurospora crassa (strain ATCC 24698 / 74-OR23-1A / CBS 708.71 / DSM 1257 / FGSC 987) GN=B8G12.220 PE=3 SV=1	metalloprotease 1	18167437	GO:0006508//proteolysis;	-	GO:0008237//metallopeptidase activity;	-
CCM_06894	1389.12	553.801	-1.32673	1.63955e-06	0.000225438	NW_006271973.1	GO:0055085;GO:0016021;GO:0008270;GO:0006351;GO:0005634;GO:0016301;GO:0003677;GO:0016310	-	sordNOG10120	G	sp|Q10097|YAOI_SCHPO Uncharacterized transporter C11D3.18C OS=Schizosaccharomyces pombe (strain 972 / ATCC 24843) GN=SPAC11D3.18c PE=3 SV=1	high-affinity nicotinic acid transporter	18168905	GO:0055085//transmembrane transport;GO:0006351//transcription, DNA-templated;GO:0016310//phosphorylation;	GO:0016021//integral component of membrane;GO:0005634//nucleus;	GO:0008270//zinc ion binding;GO:0016301//kinase activity;GO:0003677//DNA binding;	-
CCM_03644	100.303	5.44461	-4.2034	3.79759e-06	0.000425021	NW_006271971.1	-	-	-	-	-	hypothetical protein	18165670	-	-	-	-
CCM_02098	554.137	218.856	-1.34026	4.15375e-06	0.000432088	NW_006271970.1	GO:0022891;GO:0008643;GO:0055085;GO:0016021	-	KOG0254;NOG28802;opiNOG07301;opiNOG01804	GR	sp|P39932|STL1_YEAST Sugar transporter STL1 OS=Saccharomyces cerevisiae (strain ATCC 204508 / S288c) GN=STL1 PE=1 SV=2	MFS sugar transporter, putative	18164127	GO:0008643//carbohydrate transport;GO:0055085//transmembrane transport;	GO:0016021//integral component of membrane;	-	-
CCM_00138	1874.26	579.52	-1.69339	5.16443e-06	0.000528805	NW_006271969.1	GO:1902358;GO:0008271;GO:0016021	K14708	opiNOG00183;pleNOG02839;sorNOG06919	P	sp|O74377|SULH1_SCHPO Probable sulfate permease C3H7.02 OS=Schizosaccharomyces pombe (strain 972 / ATCC 24843) GN=SPBC3H7.02 PE=3 SV=1	sulfate permease	18162173	GO:1902358//sulfate transmembrane transport;	GO:0016021//integral component of membrane;	GO:0008271//secondary active sulfate transmembrane transporter activity;	-
CCM_09418	1323.57	554.574	-1.25498	6.35697e-06	0.000630782	NW_006271977.1	-	-	NOG179698	S	-	hypothetical protein	18171421	-	-	-	-
CCM_05265	481.004	192.267	-1.32294	7.0728e-06	0.000674017	NW_006271972.1	GO:0032259;GO:0008171	-	sordNOG04291;opiNOG22306;sorNOG06504;opiNOG23920	RL	sp|I1RF60|AURJ_GIBZE O-methyltransferase aurJ OS=Gibberella zeae (strain PH-1 / ATCC MYA-4620 / FGSC 9075 / NRRL 31084) GN=aurJ PE=1 SV=1	O-methyltransferase, putative	18167284	GO:0032259//methylation;	-	GO:0008171//O-methyltransferase activity;	-
CCM_07393	1205.48	505.919	-1.25263	7.56496e-06	0.00071385	NW_006271974.1	GO:0016021	-	hypNOG12443;opiNOG43218;sordNOG13376;sordNOG15647;opiNOG45755	S	-	hypothetical protein	18169404	-	GO:0016021//integral component of membrane;	-	-
CCM_01647	471.417	190.063	-1.31052	8.55925e-06	0.000785024	NW_006271969.1	GO:0016853;GO:0008152	K07511	KOG1680;sordNOG05959;NOG01182	I	sp|P76082|PAAF_ECOLI 2,3-dehydroadipyl-CoA hydratase OS=Escherichia coli (strain K12) GN=paaF PE=1 SV=1	enoyl-CoA hydratase/isomerase family protein	18163677	GO:0008152//metabolic process;	-	GO:0016853//isomerase activity;	ko00930(Caprolactam degradation);ko00650(Butanoate metabolism);ko00640(Propanoate metabolism);ko00627(Aminobenzoate degradation);ko00410(beta-Alanine metabolism);ko00380(Tryptophan metabolism);ko00310(Lysine degradation);ko00280(Valine, leucine and isoleucine degradation);ko00071(Fatty acid degradation);ko00062(Fatty acid elongation)
CCM_01426	2526.06	837.451	-1.59281	8.68043e-06	0.000788199	NW_006271969.1	-	-	hypNOG09975;sordNOG12707	S	-	hypothetical protein	18163457	-	-	-	-
CCM_09604	16030.5	7259.91	-1.14279	1.27725e-05	0.00102945	NW_006271978.1	-	-	opiNOG63745;sordNOG05240	SO	-	hypothetical protein	18171606	-	-	-	-
CCM_03750	1263.59	544.805	-1.21371	1.29356e-05	0.00102945	NW_006271971.1	-	-	opiNOG48075;sordNOG13315	S	-	hypothetical protein	18165773	-	-	-	-
CCM_08485	532.013	103.1	-2.36742	1.36946e-05	0.00108042	NW_006271975.1	GO:0003824	-	sordNOG04870;sorNOG02315	R	sp|Q2U4L7|GTAA_ASPOR Glutaminase A OS=Aspergillus oryzae (strain ATCC 42149 / RIB 40) GN=gtaA PE=1 SV=2	glutaminase GtaA	18170492	-	-	GO:0003824//catalytic activity;	-
CCM_09419	251.346	95.3956	-1.39768	1.49973e-05	0.0011641	NW_006271977.1	-	-	eurotNOG13044;opiNOG65576	S	-	hypothetical protein	18171422	-	-	-	-
CCM_03543	127.798	41.2208	-1.63242	1.87597e-05	0.00140652	NW_006271970.1	GO:0016787	K07025	opiNOG70312;sordNOG04167	R	sp|Q58832|G3PP_METJA Glyceraldehyde 3-phosphate phosphatase OS=Methanocaldococcus jannaschii (strain ATCC 43067 / DSM 2661 / JAL-1 / JCM 10045 / NBRC 100440) GN=MJ1437 PE=3 SV=1	Haloacid dehalogenase-like hydrolase	18165569	-	-	GO:0016787//hydrolase activity;	-
CCM_06308	62577.5	28033.3	-1.1585	1.88511e-05	0.00140652	NW_006271972.1	-	-	-	-	-	hypothetical protein	18168323	-	-	-	-
CCM_08262	544.448	90.4422	-2.58973	2.02671e-05	0.00147781	NW_006271975.1	GO:0016705;GO:0020037;GO:0005506;GO:0016021;GO:0004497;GO:0055114	K21296	opiNOG15076;sordNOG06490	Q	sp|A0JJT9|TENB_BEABA Cytochrome P450 monooxygenase tenB OS=Beauveria bassiana GN=tenB PE=1 SV=1	alcohol dehydrogenase, putative	18170270	GO:0055114//obsolete oxidation-reduction process;	GO:0016021//integral component of membrane;	GO:0016705//oxidoreductase activity, acting on paired donors, with incorporation or reduction of molecular oxygen;GO:0020037//heme binding;GO:0005506//iron ion binding;GO:0004497//monooxygenase activity;	-
CCM_07860	879.005	314.897	-1.48099	2.37687e-05	0.00166988	NW_006271974.1	GO:0055085;GO:0016021	-	opiNOG14687	S	sp|Q7X660|YSL11_ORYSJ Probable metal-nicotianamine transporter YSL11 OS=Oryza sativa subsp. japonica GN=YSL11 PE=2 SV=1	oligopeptide transporter	18169870	GO:0055085//transmembrane transport;	GO:0016021//integral component of membrane;	-	-
CCM_00162	517.811	37.8625	-3.77359	2.46552e-05	0.00171961	NW_006271969.1	-	-	-	-	-	hypothetical protein	18162197	-	-	-	-
CCM_01672	1575.43	707.898	-1.15414	2.88928e-05	0.00198638	NW_006271969.1	-	-	sordNOG11358;hypNOG10803;opiNOG10130	S	-	hypothetical protein	18163702	-	-	-	-
CCM_00043	76.048	6.01175	-3.66105	3.31317e-05	0.00222162	NW_006271969.1	GO:0016021;GO:0055085	-	sordNOG10259;opiNOG17171;NOG131545	UR	sp|A1CFL0|PATC_ASPCL Efflux pump patC OS=Aspergillus clavatus (strain ATCC 1007 / CBS 513.65 / DSM 816 / NCTC 3887 / NRRL 1) GN=patC PE=1 SV=1	Major facilitator superfamily transporter	18162078	GO:0055085//transmembrane transport;	GO:0016021//integral component of membrane;	-	-
CCM_02476	1845.18	848.923	-1.12005	3.7364e-05	0.00244306	NW_006271970.1	-	-	pleNOG08179;opiNOG11007	SR	-	hypothetical protein	18164503	-	-	-	-
CCM_08918	940.098	295.12	-1.67151	3.75329e-05	0.00244306	NW_006271975.1	GO:0008289;GO:0006810;GO:0005215	K08752	-	-	sp|Q9U5P1|FABP_LEPDS Fatty acid-binding protein OS=Lepidoglyphus destructor PE=1 SV=1	cellular retinoic acid binding protein	18170923	GO:0006810//transport;	-	GO:0008289//lipid binding;GO:0005215//transporter activity;	ko03320(PPAR signaling pathway)
CCM_09436	332.187	128.528	-1.36991	3.93544e-05	0.00254219	NW_006271977.1	GO:0016310;GO:0016301	-	opiNOG30364	R	-	Protein kinase-like domain	18171439	GO:0016310//phosphorylation;	-	GO:0016301//kinase activity;	-
CCM_05186	1672.19	773.464	-1.11233	4.1438e-05	0.00264133	NW_006271972.1	GO:0005975;GO:0016853;GO:0030246	K01785	sordNOG07070;opiNOG04019	G	sp|D4AMB9|GALM_ARTBC Probable aldose 1-epimerase ARB_05372 OS=Arthroderma benhamiae (strain ATCC MYA-4681 / CBS 112371) GN=ARB_05372 PE=1 SV=1	aldose 1-epimerase	18167205	GO:0005975//carbohydrate metabolic process;	-	GO:0016853//isomerase activity;GO:0030246//carbohydrate binding;	ko00052(Galactose metabolism);ko00010(Glycolysis / Gluconeogenesis)
CCM_05930	589.402	263.528	-1.1613	4.65128e-05	0.00285314	NW_006271972.1	-	-	sorNOG06794;opiNOG38382;sordNOG14180	RS	-	hypothetical protein	18167948	-	-	-	-
CCM_01944	23.7011	0.71694	-5.04696	6.0823e-05	0.00340361	NW_006271970.1	GO:0016021;GO:0004497;GO:0055114;GO:0016705;GO:0020037;GO:0005506	-	opiNOG55648;COG2124;opiNOG57135	Q	sp|Q9C449|PAXP_PENPX Cytochrome P450 monooxygenase paxP OS=Penicillium paxilli GN=paxP PE=1 SV=1	cytochrome P450, putative	18163973	GO:0055114//obsolete oxidation-reduction process;	GO:0016021//integral component of membrane;	GO:0004497//monooxygenase activity;GO:0016705//oxidoreductase activity, acting on paired donors, with incorporation or reduction of molecular oxygen;GO:0020037//heme binding;GO:0005506//iron ion binding;	-
CCM_05331	5588.55	2445.06	-1.1926	6.51421e-05	0.00362424	NW_006271972.1	GO:0055114;GO:0008199;GO:0018576;GO:0009712	K03381	sordNOG11311	E	sp|P86029|HQD2_CANAL Catechol 1,2-dioxygenase OS=Candida albicans (strain SC5314 / ATCC MYA-2876) GN=HQD2 PE=1 SV=1	Intradiol ring-cleavage dioxygenase, core	18167349	GO:0055114//obsolete oxidation-reduction process;GO:0009712//catechol-containing compound metabolic process;	-	GO:0008199//ferric iron binding;GO:0018576//catechol 1,2-dioxygenase activity;	ko00623(Toluene degradation);ko00364(Fluorobenzoate degradation);ko00362(Benzoate degradation);ko00361(Chlorocyclohexane and chlorobenzene degradation)
CCM_00604	37.0841	6.23212	-2.57301	6.58475e-05	0.00364243	NW_006271969.1	-	-	opiNOG41227;euNOG36726;eurotNOG12375	S	sp|S0DRW4|FUB4_GIBF5 Hydrolase FUB4 OS=Gibberella fujikuroi (strain CBS 195.34 / IMI 58289 / NRRL A-6831) GN=FUB4 PE=1 SV=1	DUF341 domain protein	18162639	-	-	-	-
CCM_00606	45.2265	9.11763	-2.31044	7.00404e-05	0.00385222	NW_006271969.1	GO:0046872;GO:0020037;GO:0016021	-	COG5274;opiNOG00335;sacNOG04754	CHI	sp|P49100|CYB5_ORYSJ Cytochrome b5 OS=Oryza sativa subsp. japonica GN=Os05g0108800 PE=2 SV=2	Cytochrome b5	18162641	-	GO:0016021//integral component of membrane;	GO:0046872//metal ion binding;GO:0020037//heme binding;	-
CCM_02146	1532.81	171.959	-3.15605	7.10089e-05	0.0038833	NW_006271970.1	GO:0004185;GO:0006508	-	pleNOG01590;opiNOG07609;sordNOG10805;sorNOG03135	O	sp|C7YQJ2|CBPYA_NECH7 Carboxypeptidase Y homolog A OS=Nectria haematococca (strain 77-13-4 / ATCC MYA-4622 / FGSC 9596 / MPVI) GN=CPYA PE=3 SV=1	carboxypeptidase Y	18164174	GO:0006508//proteolysis;	-	GO:0004185//serine-type carboxypeptidase activity;	-
CCM_08184	1215.45	568.998	-1.095	7.5661e-05	0.00406522	NW_006271974.1	GO:0015171;GO:0003333;GO:0016021	K16261	sordNOG07299	E	sp|P19145|GAP1_YEAST General amino-acid permease GAP1 OS=Saccharomyces cerevisiae (strain ATCC 204508 / S288c) GN=GAP1 PE=1 SV=2	general amino-acid permease GAP1	18170193	GO:0003333//amino acid transmembrane transport;	GO:0016021//integral component of membrane;	GO:0015171//amino acid transmembrane transporter activity;	-
CCM_04590	8395.05	3394.42	-1.30638	7.60249e-05	0.00406522	NW_006271971.1	-	-	opiNOG58046	S	-	hypothetical protein	18166613	-	-	-	-
CCM_01941	625.159	141.567	-2.14273	7.95207e-05	0.00418244	NW_006271970.1	GO:0050661;GO:0016021;GO:0055114;GO:0050660;GO:0004499	-	opiNOG11270	R	sp|Q9I3H5|BVMO_PSEAE Baeyer-Villiger monooxygenase OS=Pseudomonas aeruginosa (strain ATCC 15692 / DSM 22644 / CIP 104116 / JCM 14847 / LMG 12228 / 1C / PRS 101 / PAO1) GN=PA1538 PE=1 SV=1	monooxygenase, putative	18163970	GO:0055114//obsolete oxidation-reduction process;	GO:0016021//integral component of membrane;	GO:0050661//NADP binding;GO:0050660//flavin adenine dinucleotide binding;GO:0004499//N,N-dimethylaniline monooxygenase activity;	-
CCM_06156	8491.89	4157.08	-1.03052	8.58385e-05	0.00446592	NW_006271972.1	GO:0005739;GO:0009073;GO:0003849;GO:0005634;GO:0009423	K01626	opiNOG00265;sorNOG01062	E	sp|P34725|AROF_CANAX Phospho-2-dehydro-3-deoxyheptonate aldolase, phenylalanine-inhibited OS=Candida albicans GN=ARO3 PE=2 SV=1	phospho-2-dehydro-3-deoxyheptonate aldolase	18168171	GO:0009073//aromatic amino acid family biosynthetic process;GO:0009423//chorismate biosynthetic process;	GO:0005739//mitochondrion;GO:0005634//nucleus;	GO:0003849//3-deoxy-7-phosphoheptulonate synthase activity;	ko02024(Quorum sensing);ko00400(Phenylalanine, tyrosine and tryptophan biosynthesis)
CCM_09214	933.107	405.796	-1.20129	9.15871e-05	0.00463961	NW_006271976.1	GO:0009116;GO:0016310;GO:0016301	-	opiNOG24344;sordNOG06219;sorNOG07485;opiNOG15823	R	-	serine/threonine-protein kinase ripk4, putative	18171217	GO:0009116//nucleoside metabolic process;GO:0016310//phosphorylation;	-	GO:0016301//kinase activity;	-
CCM_01829	718.194	228.949	-1.64935	0.000101281	0.00505091	NW_006271969.1	GO:0016021;GO:0005524;GO:0016887	-	sordNOG07645	Q	sp|Q9MAG3|AB24G_ARATH ABC transporter G family member 24 OS=Arabidopsis thaliana GN=ABCG24 PE=2 SV=2	ABC transporter, putative	18163859	-	GO:0016021//integral component of membrane;	GO:0005524//ATP binding;GO:0016887//ATP hydrolysis activity;	-
CCM_01643	329.504	89.2816	-1.88386	0.000103075	0.00508769	NW_006271969.1	GO:0004190;GO:0006508	-	sorNOG07465;sordNOG09201;opiNOG06731	O	sp|B8NLY9|PEPA_ASPFN Aspergillopepsin-1 OS=Aspergillus flavus (strain ATCC 200026 / FGSC A1120 / NRRL 3357 / JCM 12722 / SRRC 167) GN=pepA PE=3 SV=1	penicillopepsin	18163673	GO:0006508//proteolysis;	-	GO:0004190//aspartic-type endopeptidase activity;	-
CCM_05346	329.78	144.467	-1.19076	0.000106597	0.00520103	NW_006271972.1	GO:0008270;GO:0006357;GO:0005634;GO:0000981	-	necNOG09999;sordNOG10341;opiNOG20822;sorNOG03784	S	sp|Q5A4F3|AHR1_CANAL Adhesion and hyphal regulator 1 OS=Candida albicans (strain SC5314 / ATCC MYA-2876) GN=AHR1 PE=1 SV=1	C6 finger domain protein, putative	18167364	GO:0006357//regulation of transcription by RNA polymerase II;	GO:0005634//nucleus;	GO:0008270//zinc ion binding;GO:0000981//DNA-binding transcription factor activity, RNA polymerase II-specific;	-
CCM_03386	710.533	332.73	-1.09455	0.000106993	0.00520103	NW_006271970.1	-	-	necNOG09505;hypNOG09532	S	-	hypothetical protein	18165412	-	-	-	-
CCM_08968	702.7	123.084	-2.51327	0.00011159	0.00539725	NW_006271975.1	GO:0016021	-	opiNOG43732;opiNOG58892;pleNOG06342;NOG155141;sordNOG13906	S	-	hypothetical protein	18170972	-	GO:0016021//integral component of membrane;	-	-
CCM_03098	149.005	57.6633	-1.36964	0.000121498	0.00576069	NW_006271970.1	-	-	-	-	-	hypothetical protein	18165125	-	-	-	-
CCM_05233	127.527	46.5681	-1.45339	0.000127493	0.00598595	NW_006271972.1	GO:0016310;GO:0016021;GO:0016301	-	opiNOG30364;sorNOG07742	R	sp|D7PHY8|VRTL_PENAE Efflux pump vrtL OS=Penicillium aethiopicum GN=vrtL PE=1 SV=1	Protein kinase-like domain	18167252	GO:0016310//phosphorylation;	GO:0016021//integral component of membrane;	GO:0016301//kinase activity;	-
CCM_06655	658.903	266.7	-1.30485	0.000130122	0.00607973	NW_006271973.1	-	-	-	-	-	hypothetical protein	18168669	-	-	-	-
CCM_09572	1221.02	589.276	-1.05107	0.000140321	0.00644503	NW_006271977.1	GO:0055085;GO:0016021	-	treNOG04649;opiNOG00469;saccNOG02195	G	sp|A0A089FNE5|PRLL_FUNXX MFS transporter prlL OS=Fungal sp. (strain NRRL 50135) GN=prlL PE=3 SV=1	Major facilitator superfamily transporter	18171574	GO:0055085//transmembrane transport;	GO:0016021//integral component of membrane;	-	-
CCM_06564	1551.79	333.401	-2.21861	0.000149074	0.00671642	NW_006271973.1	-	-	-	-	-	hypothetical protein	18168578	-	-	-	-
CCM_04909	349.811	158.368	-1.1433	0.000150029	0.00671642	NW_006271971.1	GO:0005634;GO:0000981;GO:0008270;GO:0006357	-	sordNOG10651;sorNOG00919;opiNOG50199	S	sp|P28348|NIRA_EMENI Nitrogen assimilation transcription factor nirA OS=Emericella nidulans (strain FGSC A4 / ATCC 38163 / CBS 112.46 / NRRL 194 / M139) GN=nirA PE=4 SV=1	C6 transcription factor, putative	18166930	GO:0006357//regulation of transcription by RNA polymerase II;	GO:0005634//nucleus;	GO:0000981//DNA-binding transcription factor activity, RNA polymerase II-specific;GO:0008270//zinc ion binding;	-
CCM_03833	307.376	136.649	-1.16953	0.000177369	0.00768999	NW_006271971.1	GO:0008199;GO:0016021;GO:0055114;GO:0016702;GO:0006725	-	sordNOG10081;sorNOG00418;opiNOG09675	R	-	extracellular dioxygenase	18165856	GO:0055114//obsolete oxidation-reduction process;GO:0006725//cellular aromatic compound metabolic process;	GO:0016021//integral component of membrane;	GO:0008199//ferric iron binding;GO:0016702//oxidoreductase activity, acting on single donors with incorporation of molecular oxygen, incorporation of two atoms of oxygen;	-
CCM_08331	1001.02	495.112	-1.01564	0.000188714	0.00801165	NW_006271975.1	GO:0016747;GO:0008152	-	opiNOG18481;opiNOG02432	IT	sp|A0A0D2YG01|FUB8_FUSO4 Non-canonical non-ribosomal peptide synthetase FUB8 OS=Fusarium oxysporum f. sp. lycopersici (strain 4287 / CBS 123668 / FGSC 9935 / NRRL 34936) GN=FUB8 PE=1 SV=1	transferase family protein	18170339	GO:0008152//metabolic process;	-	GO:0016747//acyltransferase activity, transferring groups other than amino-acyl groups;	-
CCM_05990	540.477	247.781	-1.12517	0.00018895	0.00801165	NW_006271972.1	-	-	sordNOG10211;opiNOG49721	S	-	hypothetical protein	18168008	-	-	-	-
CCM_06307	14850.6	7184.81	-1.0475	0.000190809	0.00805497	NW_006271972.1	GO:0016021	-	opiNOG44895;pleNOG09349	S	sp|B8NM67|USTYA_ASPFN Oxidase ustYa OS=Aspergillus flavus (strain ATCC 200026 / FGSC A1120 / NRRL 3357 / JCM 12722 / SRRC 167) GN=ustYa PE=1 SV=1	hypothetical protein	18168322	-	GO:0016021//integral component of membrane;	-	-
CCM_00463	1223.75	601.684	-1.02423	0.000217461	0.00899609	NW_006271969.1	GO:0016021	-	sordNOG07571	S	sp|Q5K8R6|CXT1_CRYNJ Beta-1,2-xylosyltransferase 1 OS=Cryptococcus neoformans var. neoformans serotype D (strain JEC21 / ATCC MYA-565) GN=CXT1 PE=1 SV=1	capsule associated protein, putative	18162498	-	GO:0016021//integral component of membrane;	-	-
CCM_00607	228.229	90.4702	-1.33497	0.000217775	0.00899609	NW_006271969.1	GO:0016021;GO:0004497;GO:0055114;GO:0016705;GO:0020037;GO:0005506	-	COG2124;opiNOG07098;opiNOG01968;sorNOG00294	Q	sp|P51870|CP4F5_RAT Cytochrome P450 4F5 OS=Rattus norvegicus GN=Cyp4f5 PE=2 SV=1	Cytochrome P450	18162642	GO:0055114//obsolete oxidation-reduction process;	GO:0016021//integral component of membrane;	GO:0004497//monooxygenase activity;GO:0016705//oxidoreductase activity, acting on paired donors, with incorporation or reduction of molecular oxygen;GO:0020037//heme binding;GO:0005506//iron ion binding;	-
CCM_03667	35.4838	7.06943	-2.32749	0.000231379	0.00931807	NW_006271971.1	GO:0016021;GO:0055085	-	opiNOG16814;pleNOG00563	R	sp|O94343|YHMA_SCHPO Uncharacterized MFS-type transporter C1271.10c OS=Schizosaccharomyces pombe (strain 972 / ATCC 24843) GN=SPBC1271.10c PE=1 SV=1	MFS transporter, putative	18165692	GO:0055085//transmembrane transport;	GO:0016021//integral component of membrane;	-	-
CCM_00140	390.045	182.729	-1.09394	0.000263265	0.0102087	NW_006271969.1	-	-	sordNOG05851;opiNOG01450;COG0235	TGZ	sp|Q9P5M9|MUG14_SCHPO Meiotically up-regulated gene 14 protein OS=Schizosaccharomyces pombe (strain 972 / ATCC 24843) GN=mug14 PE=1 SV=1	aldolase	18162175	-	-	-	-
CCM_08565	294.817	135.652	-1.11991	0.000299364	0.0112116	NW_006271975.1	GO:0016787	-	opiNOG25662;sordNOG05376	R	sp|Q5ACZ2|DFG5_CANAL Mannan endo-1,6-alpha-mannosidase DFG5 OS=Candida albicans (strain SC5314 / ATCC MYA-2876) GN=DFG5 PE=1 SV=1	glycosyl hydrolase, putative	18170571	-	-	GO:0016787//hydrolase activity;	-
CCM_08287	780.169	388.752	-1.00494	0.000316798	0.0116381	NW_006271975.1	GO:0006508;GO:0008236	-	opiNOG01773	O	sp|A1CX29|DPP4_NEOFI Probable dipeptidyl peptidase 4 OS=Neosartorya fischeri (strain ATCC 1020 / DSM 3700 / CBS 544.65 / FGSC A1164 / JCM 1740 / NRRL 181 / WB 181) GN=dpp4 PE=3 SV=1	extracellular dipeptidyl-peptidase Dpp4	18170295	GO:0006508//proteolysis;	-	GO:0008236//serine-type peptidase activity;	-
CCM_03175	1019.24	358.666	-1.50678	0.000334854	0.0121103	NW_006271970.1	-	-	hypNOG02547;opiNOG49437	S	-	Thioredoxin-like protein	18165202	-	-	-	-
CCM_04713	2335.89	808.159	-1.53126	0.0003372	0.0121103	NW_006271971.1	GO:0008080;GO:0016021	-	sordNOG05334;hypNOG05308	S	-	GCN5-related N-acetyltransferase	18166734	-	GO:0016021//integral component of membrane;	GO:0008080//N-acetyltransferase activity;	-
CCM_09353	29.2266	4.94804	-2.56236	0.000351649	0.0124894	NW_006271977.1	-	-	sordNOG15295	R	-	hypothetical protein	18171356	-	-	-	-
CCM_09019	385.91	183.394	-1.07332	0.00035845	0.0126376	NW_006271975.1	-	-	opiNOG43263;opiNOG44308;sordNOG14422	R	sp|Q9VFP2|RDX_DROME Protein roadkill OS=Drosophila melanogaster GN=rdx PE=1 SV=2	BTB/POZ domain protein	18171023	-	-	-	-
CCM_05744	200.323	87.0255	-1.20281	0.000376466	0.0131236	NW_006271972.1	GO:0004568;GO:0005975;GO:0004563;GO:0006032	-	opiNOG63547	G	sp|E9F7R6|CHI4_METRA Endochitinase 4 OS=Metarhizium robertsii (strain ARSEF 23 / ATCC MYA-3075) GN=chi4 PE=3 SV=1	endochitinase	18167762	GO:0005975//carbohydrate metabolic process;GO:0006032//chitin catabolic process;	-	GO:0004568//chitinase activity;GO:0004563//beta-N-acetylhexosaminidase activity;	-
CCM_01157	409.264	192.058	-1.09149	0.00043962	0.0149518	NW_006271969.1	-	-	hypNOG14296;necNOG14195	S	-	hypothetical protein	18163189	-	-	-	-
CCM_03653	46.2735	3.21455	-3.8475	0.000448486	0.0151462	NW_006271971.1	-	-	eurotNOG03541;opiNOG53463;necNOG08193	R	sp|D4ALG0|LYSM1_ARTBC LysM domain-containing protein ARB_05157 OS=Arthroderma benhamiae (strain ATCC MYA-4681 / CBS 112371) GN=ARB_05157 PE=1 SV=1	LysM domain protein, putative	18165679	-	-	-	-
CCM_06049	214.089	97.2321	-1.13871	0.000455172	0.0152119	NW_006271972.1	-	-	sordNOG04030;opiNOG24160	R	-	F-box domain protein	18168065	-	-	-	-
CCM_04299	438.525	216.78	-1.01642	0.000519458	0.0168343	NW_006271971.1	-	-	opiNOG05166	S	-	hypothetical protein	18166322	-	-	-	-
CCM_02883	2067.87	864.89	-1.25756	0.000523285	0.0168955	NW_006271970.1	GO:0004565;GO:0009341;GO:0030246;GO:0005975	K01190	sordNOG10522;opiNOG15402	G	sp|P00723|BGAL_KLULA Beta-galactosidase OS=Kluyveromyces lactis (strain ATCC 8585 / CBS 2359 / DSM 70799 / NBRC 1267 / NRRL Y-1140 / WM37) GN=LAC4 PE=1 SV=2	beta-galactosidase	18164910	GO:0005975//carbohydrate metabolic process;	GO:0009341//beta-galactosidase complex;	GO:0004565//beta-galactosidase activity;GO:0030246//carbohydrate binding;	ko00600(Sphingolipid metabolism);ko00511(Other glycan degradation);ko00052(Galactose metabolism)
CCM_08989	6832.36	1812.38	-1.91449	0.000528458	0.0169547	NW_006271975.1	GO:0055114;GO:0016491	K13366	opiNOG02620;KOG0029	Q	sp|O64411|PAO_MAIZE Polyamine oxidase OS=Zea mays GN=PAO PE=1 SV=1	flavin containing polyamine oxidase, putative	18170993	GO:0055114//obsolete oxidation-reduction process;	-	GO:0016491//oxidoreductase activity;	ko00410(beta-Alanine metabolism);ko00330(Arginine and proline metabolism)
CCM_05149	261.39	120.053	-1.12253	0.000549639	0.0173452	NW_006271972.1	GO:0003676;GO:0046872	-	opiNOG07843;necNOG11996;sordNOG12919;hypNOG12047	SR	-	C2H2 finger domain protein, putative	18167168	-	-	GO:0003676//nucleic acid binding;GO:0046872//metal ion binding;	-
CCM_07435	516.154	257.68	-1.00222	0.00057378	0.0178149	NW_006271974.1	GO:0071949;GO:0016021;GO:0004497;GO:0055114	-	opiNOG21607;sordNOG07434	SHC	sp|P15245|PHHY_TRICU Phenol hydroxylase OS=Trichosporon cutaneum PE=1 SV=3	phenol 2-monooxygenase	18169446	GO:0055114//obsolete oxidation-reduction process;	GO:0016021//integral component of membrane;	GO:0071949//FAD binding;GO:0004497//monooxygenase activity;	-
CCM_05461	211.751	97.2381	-1.12277	0.000581016	0.017924	NW_006271972.1	GO:0055085;GO:0016021	-	opiNOG55196;opiNOG02197;KOG2533	G	sp|O74923|YJ7D_SCHPO Uncharacterized transporter C757.13 OS=Schizosaccharomyces pombe (strain 972 / ATCC 24843) GN=SPCC757.13 PE=3 SV=1	Major facilitator superfamily transporter	18167479	GO:0055085//transmembrane transport;	GO:0016021//integral component of membrane;	-	-
CCM_04249	20610.4	1846.52	-3.48049	0.000603558	0.0181843	NW_006271971.1	-	-	-	-	-	hypothetical protein	18166272	-	-	-	-
CCM_08036	1128.45	558.32	-1.01518	0.000714092	0.0200291	NW_006271974.1	-	-	opiNOG46349;COG0699	RS	-	dynamin GTPase, putative	18170045	-	-	-	-
CCM_02806	533.347	217.895	-1.29144	0.000720809	0.0200291	NW_006271970.1	GO:0016021;GO:0006950	-	opiNOG18168;hypNOG05026;necNOG11051	S	sp|C8ZI10|RSB1_YEAS8 Sphingoid long-chain base transporter RSB1 OS=Saccharomyces cerevisiae (strain Lalvin EC1118 / Prise de mousse) GN=RSB1 PE=3 SV=1	RTA1 like protein	18164833	GO:0006950//response to stress;	GO:0016021//integral component of membrane;	-	-
CCM_02081	157.867	35.2143	-2.16448	0.000721187	0.0200291	NW_006271970.1	-	-	-	-	-	hypothetical protein	18164110	-	-	-	-
CCM_04268	1795.44	871.283	-1.04313	0.000746439	0.0202951	NW_006271971.1	GO:0005506;GO:0016702;GO:0055114	K00456	opiNOG07683	E	sp|Q5RLY7|CDO_AJECG Cysteine dioxygenase OS=Ajellomyces capsulatus (strain G186AR / H82 / ATCC MYA-2454 / RMSCC 2432) GN=CDO1 PE=2 SV=2	cysteine dioxygenase	18166291	GO:0055114//obsolete oxidation-reduction process;	-	GO:0005506//iron ion binding;GO:0016702//oxidoreductase activity, acting on single donors with incorporation of molecular oxygen, incorporation of two atoms of oxygen;	ko00430(Taurine and hypotaurine metabolism);ko00270(Cysteine and methionine metabolism)
CCM_05157	220.49	82.9412	-1.41055	0.000753895	0.0204401	NW_006271972.1	-	-	hypNOG09653;necNOG12491	S	-	hypothetical protein	18167176	-	-	-	-
CCM_08211	90.8028	35.0562	-1.37307	0.000773482	0.0208368	NW_006271974.1	GO:0055114;GO:0016491;GO:0071949	K00480	sordNOG09357;opiNOG00334	CR	sp|B6D1N4|HPXO_KLEPN FAD-dependent urate hydroxylase OS=Klebsiella pneumoniae GN=hpxO PE=3 SV=1	salicylate hydroxylase, putative	18170219	GO:0055114//obsolete oxidation-reduction process;	-	GO:0016491//oxidoreductase activity;GO:0071949//FAD binding;	ko00626(Naphthalene degradation);ko00624(Polycyclic aromatic hydrocarbon degradation);ko00621(Dioxin degradation)
CCM_06313	1071.52	388.801	-1.46255	0.000810087	0.0216586	NW_006271972.1	-	-	-	-	-	hypothetical protein	18168327	-	-	-	-
CCM_07828	379.901	165.737	-1.19672	0.000849444	0.0224613	NW_006271974.1	-	-	dotNOG10353;sordNOG04589;opiNOG70791	RS	-	lipolytic protein G-D-S-L family	18169838	-	-	-	-
CCM_08279	337.639	138.885	-1.28159	0.000871397	0.0227295	NW_006271975.1	GO:0016021;GO:0055085	-	sordNOG06604;KOG2262;opiNOG04814	T	sp|O23482|OPT3_ARATH Oligopeptide transporter 3 OS=Arabidopsis thaliana GN=OPT3 PE=2 SV=3	oligopeptide transporter, putative	18170287	GO:0055085//transmembrane transport;	GO:0016021//integral component of membrane;	-	-
CCM_01689	637.482	201.967	-1.65827	0.000894508	0.0229825	NW_006271969.1	GO:0016811	K01455	opiNOG14137	R	sp|Q9URY7|FMDA_SCHPO Putative formamidase C869.04 OS=Schizosaccharomyces pombe (strain 972 / ATCC 24843) GN=SPAC869.04 PE=3 SV=1	formamidase	18163719	-	-	GO:0016811//hydrolase activity, acting on carbon-nitrogen (but not peptide) bonds, in linear amides;	ko00910(Nitrogen metabolism);ko00630(Glyoxylate and dicarboxylate metabolism);ko00460(Cyanoamino acid metabolism)
CCM_06530	552.08	230.22	-1.26186	0.000920145	0.0233678	NW_006271973.1	GO:0007131;GO:0031138;GO:0006279;GO:0003723;GO:0000166;GO:0005634;GO:0005829;GO:0030435	-	sordNOG13443;sorNOG05393;opiNOG05254	R	sp|P38741|RIM4_YEAST Meiotic activator RIM4 OS=Saccharomyces cerevisiae (strain ATCC 204508 / S288c) GN=RIM4 PE=1 SV=1	RNA-binding protein	18168544	GO:0007131//reciprocal meiotic recombination;GO:0031138//negative regulation of conjugation with cellular fusion;GO:0006279//premeiotic DNA replication;GO:0030435//sporulation resulting in formation of a cellular spore;	GO:0005634//nucleus;GO:0005829//cytosol;	GO:0003723//RNA binding;GO:0000166//nucleotide binding;	-
CCM_03281	117.699	50.8493	-1.2108	0.000966019	0.0243322	NW_006271970.1	-	-	-	-	-	hypothetical protein	18165307	-	-	-	-
CCM_07289	121.074	51.7364	-1.22664	0.00096948	0.0243322	NW_006271973.1	-	-	hypNOG09639;hypNOG13493	S	-	hypothetical protein	18169300	-	-	-	-
CCM_02082	232.988	111.815	-1.05914	0.00102242	0.0252118	NW_006271970.1	GO:0004672;GO:0006468;GO:0005524	K08832	sordNOG12935;opiNOG31647	T	sp|P36616|DSK1_SCHPO Protein kinase dsk1 OS=Schizosaccharomyces pombe (strain 972 / ATCC 24843) GN=dsk1 PE=3 SV=2	protein kinase, putative	18164111	GO:0006468//protein phosphorylation;	-	GO:0004672//protein kinase activity;GO:0005524//ATP binding;	-
CCM_03498	70.3303	25.8126	-1.44607	0.00107428	0.026111	NW_006271970.1	GO:0015171;GO:0016021;GO:0003333	K19564	COG0531	E	sp|P19807|HNM1_YEAST Choline transport protein OS=Saccharomyces cerevisiae (strain ATCC 204508 / S288c) GN=HNM1 PE=1 SV=1	amino acid/polyamine transporter I	18165524	GO:0003333//amino acid transmembrane transport;	GO:0016021//integral component of membrane;	GO:0015171//amino acid transmembrane transporter activity;	-
CCM_01058	562.036	279.891	-1.0058	0.0010996	0.0265921	NW_006271969.1	-	-	-	-	-	hypothetical protein	18163091	-	-	-	-
CCM_04890	206.061	97.9962	-1.07227	0.0012124	0.0283237	NW_006271971.1	-	-	-	-	-	hypothetical protein	18166911	-	-	-	-
CCM_07318	81768.6	28418.4	-1.52472	0.00123169	0.0286354	NW_006271974.1	GO:0006508;GO:0004252	K01279	opiNOG09203;opiNOG21516;sordNOG15475	O	sp|Q8NK92|AORSN_ASPOR Aorsin OS=Aspergillus oryzae (strain ATCC 42149 / RIB 40) GN=aorO PE=1 SV=2	protease S8 tripeptidyl peptidase I, putative	18169329	GO:0006508//proteolysis;	-	GO:0004252//serine-type endopeptidase activity;	ko04142(Lysosome)
CCM_08895	283.46	141.124	-1.00618	0.00126482	0.0292643	NW_006271975.1	GO:0016021;GO:0047750;GO:0016125	K01824	sordNOG12366;pleNOG07596	I	sp|Q15125|EBP_HUMAN 3-beta-hydroxysteroid-Delta(8),Delta(7)-isomerase OS=Homo sapiens GN=EBP PE=1 SV=3	3-beta-hydroxysteroid-Delta(8),Delta(7)-isomerase	18170900	GO:0016125//sterol metabolic process;	GO:0016021//integral component of membrane;	GO:0047750//cholestenol delta-isomerase activity;	ko00100(Steroid biosynthesis)
CCM_02077	1753.59	831.667	-1.07623	0.00127002	0.0293141	NW_006271970.1	GO:0016021	-	pleNOG04407;opiNOG13267;opiNOG66558;opiNOG21307	RSM	sp|Q61982|NOTC3_MOUSE Neurogenic locus notch homolog protein 3 OS=Mus musculus GN=Notch3 PE=1 SV=1	ankyrin repeat protein	18164106	-	GO:0016021//integral component of membrane;	-	-
CCM_01943	268.157	53.6465	-2.32152	0.00132666	0.030045	NW_006271970.1	-	-	opiNOG01492;opiNOG17452;sordNOG09333	Q	sp|O74628|YQ53_SCHPO Uncharacterized oxidoreductase C162.03 OS=Schizosaccharomyces pombe (strain 972 / ATCC 24843) GN=SPCC162.03 PE=3 SV=1	short-chain dehydrogenase, putative	18163972	-	-	-	-
CCM_04992	468.079	89.2589	-2.39069	0.00157822	0.0337563	NW_006271971.1	GO:0004553;GO:0016021;GO:0030246;GO:0016740;GO:0005975	-	COG2273;sordNOG11888	GR	sp|D4ALQ5|CRH11_ARTBC Probable extracellular glycosidase ARB_05253 OS=Arthroderma benhamiae (strain ATCC MYA-4681 / CBS 112371) GN=ARB_05253 PE=1 SV=2	Concanavalin A-like lectin/glucanase	18167012	GO:0005975//carbohydrate metabolic process;	GO:0016021//integral component of membrane;	GO:0004553//hydrolase activity, hydrolyzing O-glycosyl compounds;GO:0030246//carbohydrate binding;GO:0016740//transferase activity;	-
CCM_01945	14.6355	1.40445	-3.3814	0.00158403	0.0338056	NW_006271970.1	GO:0008171;GO:0032259	-	sordNOG08908;opiNOG11885;pleNOG08061	SR	sp|D7UQ43|SOL2_ALTSO O-methyltransferase sol2 OS=Alternaria solani GN=sol2 PE=3 SV=1	O-methyltransferase, putative	18163974	GO:0032259//methylation;	-	GO:0008171//O-methyltransferase activity;	-
CCM_06258	297.365	143.21	-1.0541	0.00163899	0.0345942	NW_006271972.1	GO:0008270	-	opiNOG52705;sordNOG12376	S	-	hypothetical protein	18168273	-	-	GO:0008270//zinc ion binding;	-
CCM_03530	487.406	194.943	-1.32207	0.00165873	0.0347828	NW_006271970.1	GO:0016021	-	opiNOG70343;fuNOG23719;eurotNOG00684;KOG3098	S	sp|Q56WD3|UN931_ARATH UNC93-like protein 1 OS=Arabidopsis thaliana GN=At1g18000 PE=2 SV=2	MFS transporter, putative	18165556	-	GO:0016021//integral component of membrane;	-	-
CCM_08258	186.069	89.3552	-1.05822	0.00167324	0.0349349	NW_006271975.1	GO:0055085;GO:0016021	-	sordNOG04807;opiNOG03703	G	sp|A0A089FNE5|PRLL_FUNXX MFS transporter prlL OS=Fungal sp. (strain NRRL 50135) GN=prlL PE=3 SV=1	vitamin H transporter, putative	18170266	GO:0055085//transmembrane transport;	GO:0016021//integral component of membrane;	-	-
CCM_02820	158.699	74.9484	-1.08232	0.00186098	0.0378591	NW_006271970.1	-	-	-	-	-	hypothetical protein	18164847	-	-	-	-
CCM_09373	3151.51	1552.14	-1.02178	0.00186837	0.0378591	NW_006271977.1	-	-	opiNOG36175;sordNOG13204	R	-	expression library immunization antigen 1	18171376	-	-	-	-
CCM_03676	229.469	114.194	-1.00681	0.001906	0.038424	NW_006271971.1	GO:0005524;GO:0006468;GO:0004672	-	opiNOG57281;sordNOG13428;sorNOG08424;hypNOG12906	RS	sp|Q9UU87|PPK34_SCHPO Serine/threonine-protein kinase ppk34 OS=Schizosaccharomyces pombe (strain 972 / ATCC 24843) GN=ppk34 PE=3 SV=2	Protein kinase-like domain	18165700	GO:0006468//protein phosphorylation;	-	GO:0005524//ATP binding;GO:0004672//protein kinase activity;	-
CCM_01567	329.669	121.185	-1.44381	0.00203889	0.0402281	NW_006271969.1	-	-	hypNOG02587	S	-	hypothetical protein	18163598	-	-	-	-
CCM_03693	161.379	77.4316	-1.05945	0.00204485	0.0402489	NW_006271971.1	-	-	opiNOG09489	R	-	hypothetical protein	18165717	-	-	-	-
CCM_03695	20.1332	3.40246	-2.56492	0.00208904	0.0405056	NW_006271971.1	-	-	opiNOG26431;sordNOG10895;sorNOG06666	Q	sp|D7UQ42|SOL3_ALTSO Short chain dehydrogenase sol3 OS=Alternaria solani GN=sol3 PE=3 SV=1	short-chain dehydrogenase, putative	18165719	-	-	-	-
CCM_07219	32.2442	4.38391	-2.87875	0.00210471	0.0405968	NW_006271973.1	GO:0016021;GO:0006950	-	opiNOG18246;sordNOG11531	S	sp|B3LJA1|RSB1_YEAS1 Sphingoid long-chain base transporter RSB1 OS=Saccharomyces cerevisiae (strain RM11-1a) GN=RSB1 PE=3 SV=2	RTA1 domain protein	18169230	GO:0006950//response to stress;	GO:0016021//integral component of membrane;	-	-
CCM_08838	829.297	174.878	-2.24554	0.0023579	0.0441532	NW_006271975.1	-	-	-	-	-	hypothetical protein	18170843	-	-	-	-
CCM_02829	162.548	80.0319	-1.02222	0.00252644	0.0463071	NW_006271970.1	-	-	opiNOG03177;sordNOG08795	S	sp|P53933|APP1_YEAST Phosphatidate phosphatase APP1 OS=Saccharomyces cerevisiae (strain ATCC 204508 / S288c) GN=APP1 PE=1 SV=1	hypothetical protein	18164856	-	-	-	-
CCM_06240	20.4865	3.66697	-2.48201	0.00268366	0.0481906	NW_006271972.1	-	-	-	-	-	hypothetical protein	18168255	-	-	-	-
CCM_04551	101.035	41.6789	-1.27746	0.00286622	0.0500678	NW_006271971.1	GO:0005975;GO:0019013;GO:0004553	K05991	opiNOG11424	R	sp|Q9GV16|EGCSE_CYANO Endoglycoceramidase OS=Cyanea nozakii PE=1 SV=1	cellulase, putative	18166574	GO:0005975//carbohydrate metabolic process;	GO:0019013//viral nucleocapsid;	GO:0004553//hydrolase activity, hydrolyzing O-glycosyl compounds;	-
CCM_08988	5199.79	1159.11	-2.16544	0.00287596	0.050147	NW_006271975.1	GO:0015171;GO:0003333;GO:0016021	K19564	COG0531;opiNOG11375	E	sp|P19807|HNM1_YEAST Choline transport protein OS=Saccharomyces cerevisiae (strain ATCC 204508 / S288c) GN=HNM1 PE=1 SV=1	amino acid/polyamine transporter I	18170992	GO:0003333//amino acid transmembrane transport;	GO:0016021//integral component of membrane;	GO:0015171//amino acid transmembrane transporter activity;	-
CCM_00721	1325.96	260.098	-2.34991	0.00294504	0.0511661	NW_006271969.1	GO:0004181;GO:0006508;GO:0008270	-	sordNOG07608;sorNOG02698;opiNOG00714	R	sp|C5FH26|MCPAL_ARTOC Metallocarboxypeptidase A-like protein MCYG_01475 OS=Arthroderma otae (strain ATCC MYA-4605 / CBS 113480) GN=MCYG_01475 PE=3 SV=1	carboxypeptidase A1 precursor	18162755	GO:0006508//proteolysis;	-	GO:0004181//metallocarboxypeptidase activity;GO:0008270//zinc ion binding;	-
CCM_05340	357.252	128.089	-1.47979	0.00308298	0.0528001	NW_006271972.1	GO:0016021;GO:0055085	-	opiNOG06381;sordNOG04945	R	sp|P25351|YCR3_YEAST Uncharacterized membrane protein YCR023C OS=Saccharomyces cerevisiae (strain ATCC 204508 / S288c) GN=YCR023C PE=1 SV=2	MFS multidrug transporter, putative	18167358	GO:0055085//transmembrane transport;	GO:0016021//integral component of membrane;	-	-
CCM_08263	794.491	296.458	-1.4222	0.00325197	0.0547541	NW_006271975.1	GO:0005506;GO:0020037;GO:0016712;GO:0016021;GO:0055114	K21446	opiNOG05933	Q	sp|A0JJT8|TENA_BEABA Cytochrome P450 monooxygenase tenA OS=Beauveria bassiana GN=tenA PE=1 SV=1	cytochrome P450 monooxygenase, putative	18170271	GO:0055114//obsolete oxidation-reduction process;	GO:0016021//integral component of membrane;	GO:0005506//iron ion binding;GO:0020037//heme binding;GO:0016712//oxidoreductase activity, acting on paired donors, with incorporation or reduction of molecular oxygen, reduced flavin or flavoprotein as one donor, and incorporation of one atom of oxygen;	-
CCM_07730	129.559	61.9174	-1.06519	0.00339278	0.0563027	NW_006271974.1	GO:0050660;GO:0055114;GO:0016614	-	opiNOG06135	R	sp|B1Z034|BETA_BURA4 Oxygen-dependent choline dehydrogenase OS=Burkholderia ambifaria (strain MC40-6) GN=betA PE=3 SV=1	Glucose-methanol-choline oxidoreductase	18169740	GO:0055114//obsolete oxidation-reduction process;	-	GO:0050660//flavin adenine dinucleotide binding;GO:0016614//oxidoreductase activity, acting on CH-OH group of donors;	-
CCM_00608	215.431	77.6415	-1.47233	0.00357566	0.0583317	NW_006271969.1	GO:0055085;GO:0016021	-	opiNOG18573;sordNOG06197;magNOG04098	R	sp|A0A0M9EQT6|DEP3_FUSLA Efflux pump DEP3 OS=Fusarium langsethiae GN=DEP3 PE=2 SV=1	efflux pump antibiotic resistance protein, putative	18162643	GO:0055085//transmembrane transport;	GO:0016021//integral component of membrane;	-	-
CCM_03436	18.8677	3.32322	-2.50526	0.00373069	0.059747	NW_006271970.1	GO:0055085;GO:0016021	-	sordNOG06493;necNOG11337;sorNOG03283	T	sp|Q06593|OPT2_YEAST Oligopeptide transporter 2 OS=Saccharomyces cerevisiae (strain ATCC 204508 / S288c) GN=OPT2 PE=1 SV=1	Oligopeptide transporter OPT superfamily	18165462	GO:0055085//transmembrane transport;	GO:0016021//integral component of membrane;	-	-
CCM_02904	879.111	307.764	-1.51422	0.00383683	0.0610404	NW_006271970.1	GO:0003824	-	opiNOG22420;sordNOG10566	SR	-	hypothetical protein	18164931	-	-	GO:0003824//catalytic activity;	-
CCM_06083	1008.18	469.653	-1.10208	0.0038809	0.0611992	NW_006271972.1	GO:0005506;GO:0016705;GO:0031418;GO:0055114;GO:0016021;GO:0016747	-	sorNOG00796;NOG130793;NOG15003;opiNOG14299	S	sp|F4J0A8|P4H6_ARATH Probable prolyl 4-hydroxylase 6 OS=Arabidopsis thaliana GN=P4H6 PE=2 SV=1	acyltransferase, putative	18168098	GO:0055114//obsolete oxidation-reduction process;	GO:0016021//integral component of membrane;	GO:0005506//iron ion binding;GO:0016705//oxidoreductase activity, acting on paired donors, with incorporation or reduction of molecular oxygen;GO:0031418//L-ascorbic acid binding;GO:0016747//acyltransferase activity, transferring groups other than amino-acyl groups;	-
CCM_02542	9313.5	2658.51	-1.8087	0.00393669	0.0615107	NW_006271970.1	-	-	hypNOG14148;opiNOG65965;necNOG14142	S	-	hypothetical protein	18164569	-	-	-	-
CCM_01026	417.862	196.168	-1.09094	0.00410544	0.0634267	NW_006271969.1	GO:0016705;GO:0020037;GO:0005506;GO:0004497;GO:0016021;GO:0055114	-	sordNOG07715	Q	sp|S0DPM1|APF7_GIBF5 Cytochrome P450 monooxygenase apf7 OS=Gibberella fujikuroi (strain CBS 195.34 / IMI 58289 / NRRL A-6831) GN=apf7 PE=1 SV=1	cytochrome P450 monooxygenase, putative	18163059	GO:0055114//obsolete oxidation-reduction process;	GO:0016021//integral component of membrane;	GO:0016705//oxidoreductase activity, acting on paired donors, with incorporation or reduction of molecular oxygen;GO:0020037//heme binding;GO:0005506//iron ion binding;GO:0004497//monooxygenase activity;	-
CCM_05709	35.5871	3.50245	-3.34492	0.00417741	0.0638215	NW_006271972.1	GO:0016021;GO:0016052;GO:0008496	K08257	hypNOG03770;sordNOG04720;opiNOG19415	RS	sp|P36091|DCW1_YEAST Mannan endo-1,6-alpha-mannosidase DCW1 OS=Saccharomyces cerevisiae (strain ATCC 204508 / S288c) GN=DCW1 PE=1 SV=1	Mannan endo-1,6-alpha-mannosidase	18167727	GO:0016052//carbohydrate catabolic process;	GO:0016021//integral component of membrane;	GO:0008496//mannan endo-1,6-alpha-mannosidase activity;	-
CCM_05526	59451.5	25155.8	-1.24082	0.00429329	0.0649732	NW_006271972.1	GO:0055114;GO:0006562;GO:0004657	K00318	opiNOG12927;COG0506	E	sp|O74524|PROD_SCHPO Probable proline dehydrogenase, mitochondrial OS=Schizosaccharomyces pombe (strain 972 / ATCC 24843) GN=SPCC70.03c PE=3 SV=1	Proline oxidase	18167544	GO:0055114//obsolete oxidation-reduction process;GO:0006562//proline catabolic process;	-	GO:0004657//proline dehydrogenase activity;	ko00330(Arginine and proline metabolism)
CCM_08403	53.2546	11.9322	-2.15805	0.00487027	0.0703849	NW_006271975.1	-	-	sordNOG09882	S	-	hypothetical protein	18170411	-	-	-	-
CCM_06239	7.18379	0	-Inf	0.00493754	0.0706149	NW_006271972.1	-	-	-	-	-	hypothetical protein	18168254	-	-	-	-
CCM_06923	96.7845	16.7274	-2.53256	0.00501588	0.0712062	NW_006271973.1	GO:0046872;GO:0016491;GO:0055114	-	sordNOG07078;pleNOG07256;opiNOG23784	SQ	sp|D7PHZ1|VRTI_PENAE Oxidoreductase vrtI OS=Penicillium aethiopicum GN=vrtI PE=1 SV=1	2OG-Fe(II) oxygenase family oxidoreductase, putative	18168934	GO:0055114//obsolete oxidation-reduction process;	-	GO:0046872//metal ion binding;GO:0016491//oxidoreductase activity;	-
CCM_02265	282.06	120.026	-1.23266	0.00562457	0.0762486	NW_006271970.1	GO:0016021	K22736	opiNOG60016;sordNOG13880	S	sp|P47818|CCC1_YEAST Protein CCC1 OS=Saccharomyces cerevisiae (strain ATCC 204508 / S288c) GN=CCC1 PE=1 SV=1	hypothetical protein	18164292	-	GO:0016021//integral component of membrane;	-	-
CCM_02516	393.485	152.002	-1.37222	0.00576969	0.0774777	NW_006271970.1	GO:0016021;GO:0055085	-	opiNOG14968;KOG0255	R	sp|A0A0U2UXG3|ITP1_USTMD Itaconate transport protein OS=Ustilago maydis GN=ITP1 PE=3 SV=1	Major facilitator superfamily transporter	18164543	GO:0055085//transmembrane transport;	GO:0016021//integral component of membrane;	-	-
CCM_04458	106.8	42.1641	-1.34082	0.0059605	0.0790218	NW_006271971.1	GO:0016301;GO:0016310	-	opiNOG53673;sordNOG04001	S	sp|C5MED4|AIM9_CANTT Altered inheritance of mitochondria protein 9, mitochondrial OS=Candida tropicalis (strain ATCC MYA-3404 / T1) GN=AIM9 PE=3 SV=1	Protein kinase-like domain	18166481	GO:0016310//phosphorylation;	-	GO:0016301//kinase activity;	-
CCM_01904	446.28	195.329	-1.19205	0.00659451	0.0846295	NW_006271969.1	GO:0005975;GO:0016787;GO:0030246	-	COG1554;opiNOG04245	G	sp|D4B5H9|ATC1_ARTBC Cell wall acid trehalase ARB_03719 OS=Arthroderma benhamiae (strain ATCC MYA-4681 / CBS 112371) GN=ARB_03719 PE=1 SV=1	alpha,alpha-trehalose glucohydrolase TreA/Ath1	18163933	GO:0005975//carbohydrate metabolic process;	-	GO:0016787//hydrolase activity;GO:0030246//carbohydrate binding;	-
CCM_07434	8.48172	0.343755	-4.6249	0.00667506	0.0849834	NW_006271974.1	-	-	-	-	-	hypothetical protein	18169445	-	-	-	-
CCM_02474	102.408	49.9826	-1.03483	0.00682026	0.0860354	NW_006271970.1	-	-	opiNOG31706;chaNOG07556;magNOG11498	S	-	hypothetical protein	18164501	-	-	-	-
CCM_04241	406.083	174.073	-1.22208	0.00712806	0.087287	NW_006271971.1	-	-	necNOG08575;opiNOG57211;sordNOG14781	SR	-	hypothetical protein	18166264	-	-	-	-
CCM_01565	325.31	132.4	-1.29691	0.00734594	0.0890066	NW_006271969.1	-	-	opiNOG63387;sordNOG15341	S	-	hypothetical protein	18163596	-	-	-	-
CCM_06741	62.1415	26.8967	-1.20813	0.00789553	0.0935071	NW_006271973.1	GO:0008643;GO:0055085;GO:0022891;GO:0016021	K08139	opiNOG00669	R	sp|Q92253|RCO3_NEUCR Probable glucose transporter rco-3 OS=Neurospora crassa (strain ATCC 24698 / 74-OR23-1A / CBS 708.71 / DSM 1257 / FGSC 987) GN=rco-3 PE=3 SV=2	high-affinity glucose transporter	18168754	GO:0008643//carbohydrate transport;GO:0055085//transmembrane transport;	GO:0016021//integral component of membrane;	-	ko04113(Meiosis - yeast)
CCM_06482	167.737	32.5205	-2.36678	0.00810835	0.0944829	NW_006271973.1	-	-	sordNOG08115	R	sp|Q9FCD7|TAP_STRCO Tripeptidyl aminopeptidase OS=Streptomyces coelicolor (strain ATCC BAA-471 / A3(2) / M145) GN=tap PE=3 SV=1	proteinase, putative	18168496	-	-	-	-
CCM_06481	293.939	64.9202	-2.17878	0.00901467	0.101362	NW_006271973.1	-	-	-	-	-	hypothetical protein	18168495	-	-	-	-
CCM_07454	97.3519	31.8304	-1.6128	0.00903015	0.101418	NW_006271974.1	-	-	-	-	-	hypothetical protein	18169465	-	-	-	-
CCM_07495	41.6725	15.9252	-1.38779	0.00905993	0.101545	NW_006271974.1	GO:0033179;GO:0005774;GO:0015991;GO:0015078;GO:0016021	K02155	opiNOG26252;sordNOG08293;COG0636	C	sp|P27449|VATL_HUMAN V-type proton ATPase 16 kDa proteolipid subunit OS=Homo sapiens GN=ATP6V0C PE=1 SV=1	Proteolipid subunit of the vacuolar H(+)-ATPase	18169506	-	GO:0033179//proton-transporting V-type ATPase, V0 domain;GO:0005774//vacuolar membrane;GO:0016021//integral component of membrane;	GO:0015078//proton transmembrane transporter activity;	ko05323(Rheumatoid arthritis);ko05165(Human papillomavirus infection);ko05152(Tuberculosis);ko05120(Epithelial cell signaling in Helicobacter pylori infection);ko05110(Vibrio cholerae infection);ko04966(Collecting duct acid secretion);ko04721(Synaptic vesicle cycle);ko04145(Phagosome);ko04142(Lysosome);ko00190(Oxidative phosphorylation)
CCM_08811	1237.37	482.886	-1.35752	0.00998993	0.108884	NW_006271975.1	GO:0000272;GO:2001070;GO:0004339	K01178	sordNOG09154;opiNOG06611	GR	sp|P14804|AMYG_NEUCR Glucoamylase OS=Neurospora crassa (strain ATCC 24698 / 74-OR23-1A / CBS 708.71 / DSM 1257 / FGSC 987) GN=gla-1 PE=1 SV=3	glucoamylase I precursor	18170816	GO:0000272//polysaccharide catabolic process;	-	GO:2001070//starch binding;GO:0004339//glucan 1,4-alpha-glucosidase activity;	ko00500(Starch and sucrose metabolism)
CCM_09375	739.797	280.011	-1.40165	0.0101742	0.109906	NW_006271977.1	GO:0016884	K01426	opiNOG52216;COG0154;sordNOG08113	J	sp|Q9URY4|YI01_SCHPO Putative amidase C869.01 OS=Schizosaccharomyces pombe (strain 972 / ATCC 24843) GN=SPAC869.01 PE=3 SV=1	amidase family protein	18171378	-	-	GO:0016884//carbon-nitrogen ligase activity, with glutamine as amido-N-donor;	ko00643(Styrene degradation);ko00627(Aminobenzoate degradation);ko00380(Tryptophan metabolism);ko00360(Phenylalanine metabolism);ko00330(Arginine and proline metabolism)
CCM_00413	78.8704	22.372	-1.81779	0.0102555	0.110537	NW_006271969.1	GO:0016021;GO:0016491;GO:0055114;GO:0006633;GO:0005506	-	eurotNOG03053;opiNOG24129	S	sp|A0A024FA41|VLMA_LECSP Fatty acid hydroxylase vlmA OS=Lecanicillium sp. GN=vlmA PE=3 SV=1	Fatty acid hydroxylase	18162448	GO:0055114//obsolete oxidation-reduction process;GO:0006633//fatty acid biosynthetic process;	GO:0016021//integral component of membrane;	GO:0016491//oxidoreductase activity;GO:0005506//iron ion binding;	-
CCM_08734	144.558	60.8424	-1.2485	0.0104465	0.111605	NW_006271975.1	-	-	necNOG13645;sordNOG15237	S	-	Extracellular membrane protein, 8-cysteine region, CFEM	18170739	-	-	-	-
CCM_02577	14977.2	7329.7	-1.03094	0.011084	0.11581	NW_006271970.1	-	-	opiNOG12826;sordNOG11328	S	-	hypothetical protein	18164604	-	-	-	-
CCM_07727	35.3745	9.29949	-1.92749	0.0111	0.11581	NW_006271974.1	GO:0055114;GO:0045329;GO:0050353;GO:0005506;GO:0031418	K00474	opiNOG08191;sordNOG11252	I	sp|Q96UB1|TMLH_NEUCR Trimethyllysine dioxygenase OS=Neurospora crassa (strain ATCC 24698 / 74-OR23-1A / CBS 708.71 / DSM 1257 / FGSC 987) GN=cbs-1 PE=2 SV=2	trimethyllysine dioxygenase	18169737	GO:0055114//obsolete oxidation-reduction process;GO:0045329//carnitine biosynthetic process;	-	GO:0050353//trimethyllysine dioxygenase activity;GO:0005506//iron ion binding;GO:0031418//L-ascorbic acid binding;	ko00310(Lysine degradation)
CCM_05951	78.874	22.4746	-1.81125	0.0111271	0.11581	NW_006271972.1	GO:0005506;GO:0019439;GO:0051537;GO:0055114;GO:0016708	-	sordNOG10594;COG4638;opiNOG02374	PRS	sp|P0ABR8|YEAW_ECO57 Putative dioxygenase subunit alpha YeaW OS=Escherichia coli O157:H7 GN=yeaW PE=3 SV=1	iron-sulfur cluster-binding protein, rieske family domain protein	18167969	GO:0019439//aromatic compound catabolic process;GO:0055114//obsolete oxidation-reduction process;	-	GO:0005506//iron ion binding;GO:0051537//2 iron, 2 sulfur cluster binding;GO:0016708//oxidoreductase activity, acting on paired donors, with incorporation or reduction of molecular oxygen, NAD(P)H as one donor, and incorporation of two atoms of oxygen into one donor;	-
CCM_07708	3969.62	1022.7	-1.95662	0.0118081	0.120744	NW_006271974.1	-	-	-	-	-	hypothetical protein	18169718	-	-	-	-
CCM_08698	473.199	155.812	-1.60264	0.0119335	0.121288	NW_006271975.1	GO:0004565;GO:0005975	-	opiNOG04358;sordNOG06415;COG1874	G	sp|A2QAN3|BGALA_ASPNC Probable beta-galactosidase A OS=Aspergillus niger (strain CBS 513.88 / FGSC A1513) GN=lacA PE=1 SV=1	beta-galactosidase lacA	18170704	GO:0005975//carbohydrate metabolic process;	-	GO:0004565//beta-galactosidase activity;	-
CCM_06217	2460.66	858.801	-1.51865	0.0128716	0.12742	NW_006271972.1	-	K13993	NOG70193;hypNOG13011;sordNOG13627	O	sp|O14368|HSP16_SCHPO Heat shock protein 16 OS=Schizosaccharomyces pombe (strain 972 / ATCC 24843) GN=hsp16 PE=1 SV=1	HSP20-like chaperone	18168232	-	-	-	ko04141(Protein processing in endoplasmic reticulum)
CCM_00605	34.078	8.7033	-1.96921	0.0150096	0.139753	NW_006271969.1	GO:0016021	-	opiNOG45979;COG1028;opiNOG51950;NOG107279	QIS	-	hypothetical protein	18162640	-	GO:0016021//integral component of membrane;	-	-
CCM_09602	142193	65278.6	-1.12317	0.0151296	0.140291	NW_006271978.1	-	-	opiNOG11011	S	-	hypothetical protein	18171604	-	-	-	-
CCM_00147	2362.22	1036.74	-1.1881	0.0151914	0.140552	NW_006271969.1	-	-	sordNOG13279;opiNOG40387	SR	sp|Q4WCX9|YA280_ASPFU Uncharacterized protein AFUA_6G02800 OS=Neosartorya fumigata (strain ATCC MYA-4609 / Af293 / CBS 101355 / FGSC A1100) GN=AFUA_6G02800 PE=1 SV=1	hypothetical protein	18162182	-	-	-	-
CCM_09530	19.1581	4.92163	-1.96075	0.0157031	0.142525	NW_006271977.1	GO:0016884	K01426	sordNOG07417;sordNOG08113;opiNOG12734;COG0154;sorNOG07359	J	sp|B1GZD3|GATA_UNCTG Glutamyl-tRNA(Gln) amidotransferase subunit A OS=Uncultured termite group 1 bacterium phylotype Rs-D17 GN=gatA PE=3 SV=1	amidase family protein	18171532	-	-	GO:0016884//carbon-nitrogen ligase activity, with glutamine as amido-N-donor;	ko00643(Styrene degradation);ko00627(Aminobenzoate degradation);ko00380(Tryptophan metabolism);ko00360(Phenylalanine metabolism);ko00330(Arginine and proline metabolism)
CCM_08193	3761.86	1216.1	-1.62919	0.0172384	0.151005	NW_006271974.1	GO:0005507;GO:0009308;GO:0055114;GO:0008131;GO:0048038	K00276	opiNOG23723;COG3733	Q	sp|P12807|AMO_PICAN Peroxisomal primary amine oxidase OS=Pichia angusta GN=AMO PE=1 SV=1	peroxisomal copper amine oxidase	18170202	GO:0009308//amine metabolic process;GO:0055114//obsolete oxidation-reduction process;	-	GO:0005507//copper ion binding;GO:0008131//primary amine oxidase activity;GO:0048038//quinone binding;	ko00960(Tropane, piperidine and pyridine alkaloid biosynthesis);ko00950(Isoquinoline alkaloid biosynthesis);ko00410(beta-Alanine metabolism);ko00360(Phenylalanine metabolism);ko00350(Tyrosine metabolism);ko00260(Glycine, serine and threonine metabolism)
CCM_06082	227.067	100.405	-1.17728	0.019216	0.162811	NW_006271972.1	-	-	-	-	-	hypothetical protein	18168097	-	-	-	-
CCM_06372	2930.37	1122.29	-1.38464	0.0203376	0.167999	NW_006271972.1	-	-	opiNOG44926;NOG113577	S	-	hypothetical protein	18168386	-	-	-	-
CCM_03656	350.642	105.938	-1.72678	0.021371	0.172854	NW_006271971.1	-	-	opiNOG21337	R	sp|D4ALG0|LYSM1_ARTBC LysM domain-containing protein ARB_05157 OS=Arthroderma benhamiae (strain ATCC MYA-4681 / CBS 112371) GN=ARB_05157 PE=1 SV=1	LysM domain protein, putative	18165682	-	-	-	-
CCM_00609	59.8331	29.5735	-1.01664	0.0225606	0.177498	NW_006271969.1	-	-	-	-	-	hypothetical protein	18162644	-	-	-	-
CCM_08917	5.20071	0	-Inf	0.0228228	0.178884	NW_006271975.1	-	-	-	-	-	hypothetical protein	18170922	-	-	-	-
CCM_02206	29.338	5.07142	-2.53231	0.023966	0.184463	NW_006271970.1	-	-	-	-	-	hypothetical protein	18164233	-	-	-	-
CCM_08864	3683.08	969.032	-1.9263	0.024726	0.187392	NW_006271975.1	GO:0004089;GO:0008270	K01673	opiNOG25937;sordNOG13505	P	sp|P9WPJ6|MTCA1_MYCTO Beta-carbonic anhydrase 1 OS=Mycobacterium tuberculosis (strain CDC 1551 / Oshkosh) GN=mtcA1 PE=3 SV=1	carbonic anhydrase, putative	18170869	-	-	GO:0004089//carbonate dehydratase activity;GO:0008270//zinc ion binding;	ko00910(Nitrogen metabolism)
CCM_04819	37.0826	12.7404	-1.54133	0.0250229	0.189022	NW_006271971.1	GO:0016021	-	-	-	-	hypothetical protein	18166840	-	GO:0016021//integral component of membrane;	-	-
CCM_08345	7.80356	0.634684	-3.62002	0.0252301	0.189867	NW_006271975.1	-	-	opiNOG01617;hypNOG04234;sordNOG11440;opiNOG17312;COG0666	SMR	sp|Q00808|HETE1_PODAS Vegetative incompatibility protein HET-E-1 OS=Podospora anserina GN=HET-E1 PE=4 SV=1	NACHT and ankyrin domain protein	18170353	-	-	-	-
CCM_08940	71.6188	33.8427	-1.08149	0.0255222	0.190828	NW_006271975.1	GO:0016021	K07034	sordNOG13278;opiNOG31022	S	sp|Q460G9|ALCS_EMENI Protein alcS OS=Emericella nidulans (strain FGSC A4 / ATCC 38163 / CBS 112.46 / NRRL 194 / M139) GN=alcS PE=2 SV=1	plasma membrane ammonium transporter (Ato3)	18170945	-	GO:0016021//integral component of membrane;	-	-
CCM_02877	39.7788	17.6179	-1.17496	0.0267057	0.196516	NW_006271970.1	GO:0016021;GO:0055085	-	sordNOG05475	R	sp|A0A0U2UXG3|ITP1_USTMD Itaconate transport protein OS=Ustilago maydis GN=ITP1 PE=3 SV=1	general substrate transporter	18164904	GO:0055085//transmembrane transport;	GO:0016021//integral component of membrane;	-	-
CCM_00639	280.564	128.25	-1.12938	0.027803	0.201357	NW_006271969.1	-	-	opiNOG33219;sordNOG13665;hypNOG07307	R	-	hypothetical protein	18162674	-	-	-	-
CCM_03652	64.946	20.7706	-1.6447	0.0285484	0.204448	NW_006271971.1	GO:0006032;GO:0005975;GO:0004568;GO:0008061	K01183	opiNOG51904;opiNOG03681	G	sp|Q13231|CHIT1_HUMAN Chitotriosidase-1 OS=Homo sapiens GN=CHIT1 PE=1 SV=1	bacteriodes thetaiotaomicron symbiotic chitinase, putative	18165678	GO:0006032//chitin catabolic process;GO:0005975//carbohydrate metabolic process;	-	GO:0004568//chitinase activity;GO:0008061//chitin binding;	ko00520(Amino sugar and nucleotide sugar metabolism)
CCM_08793	1281.06	294.531	-2.12084	0.0293075	0.207608	NW_006271975.1	-	-	necNOG12294	S	-	hypothetical protein	18170798	-	-	-	-
CCM_06801	5598.58	1848.53	-1.59869	0.0294519	0.208131	NW_006271973.1	GO:0016021	-	sordNOG12549;opiNOG44287	S	-	hypothetical protein	18168812	-	GO:0016021//integral component of membrane;	-	-
CCM_06533	156.004	60.9159	-1.35669	0.0310577	0.212008	NW_006271973.1	GO:0006508;GO:0008236	-	sordNOG10253;opiNOG08748;opiNOG16291	O	sp|P34528|YM67_CAEEL Putative serine protease K12H4.7 OS=Caenorhabditis elegans GN=K12H4.7 PE=3 SV=2	serine peptidase, putative	18168547	GO:0006508//proteolysis;	-	GO:0008236//serine-type peptidase activity;	-
CCM_04258	92.4805	44.4236	-1.05782	0.0343673	0.223162	NW_006271971.1	-	-	onyNOG07917;opiNOG44359	S	-	hypothetical protein	18166281	-	-	-	-
CCM_06856	130.779	37.0153	-1.82094	0.0343844	0.223162	NW_006271973.1	GO:0016021	-	opiNOG36907;sorNOG08422;sordNOG12981;sordNOG13614	S	-	hypothetical protein	18168867	-	GO:0016021//integral component of membrane;	-	-
CCM_01414	16.955	4.93332	-1.78108	0.0352949	0.227081	NW_006271969.1	-	-	opiNOG61318	S	-	hypothetical protein	18163445	-	-	-	-
CCM_06855	118.691	29.7787	-1.99486	0.0358124	0.227919	NW_006271973.1	GO:0016021	-	opiNOG36907;opiNOG26592;opiNOG48972	S	sp|A0A0U1LQF6|CCTO_TALIS Cyclochlorotine biosynthesis protein O OS=Talaromyces islandicus GN=cctO PE=3 SV=1	hypothetical protein	18168866	-	GO:0016021//integral component of membrane;	-	-
CCM_05178	94.4895	34.2393	-1.4645	0.0364424	0.229704	NW_006271972.1	-	-	NOG160506;opiNOG45593	S	-	hypothetical protein	18167197	-	-	-	-
CCM_02085	64.7813	26.6883	-1.27937	0.0370719	0.232129	NW_006271970.1	GO:0016021;GO:0006810;GO:0005215	-	opiNOG07665;sordNOG06852	G	sp|Q51389|GLPF_PSEAE Glycerol uptake facilitator protein OS=Pseudomonas aeruginosa (strain ATCC 15692 / DSM 22644 / CIP 104116 / JCM 14847 / LMG 12228 / 1C / PRS 101 / PAO1) GN=glpF PE=3 SV=2	glycerol uptake facilitator, putative	18164114	GO:0006810//transport;	GO:0016021//integral component of membrane;	GO:0005215//transporter activity;	-
CCM_07320	23.4706	8.88517	-1.40138	0.0375843	0.233386	NW_006271974.1	GO:0004386;GO:0031048;GO:0005829;GO:0030702;GO:0031380;GO:0000775	K11701	sordNOG04573;sorNOG03033	L	sp|O74465|HRR1_SCHPO Helicase required for RNAi-mediated heterochromatin assembly 1 OS=Schizosaccharomyces pombe (strain 972 / ATCC 24843) GN=hrr1 PE=1 SV=2	DEAD box helicase	18169331	GO:0031048//heterochromatin assembly by small RNA;	GO:0005829//cytosol;GO:0031380//nuclear RNA-directed RNA polymerase complex;GO:0000775//chromosome, centromeric region;	GO:0004386//helicase activity;	-
CCM_09618	8.7946	1.38973	-2.66181	0.0384192	0.236669	NW_006271978.1	GO:0008233;GO:0016021;GO:0006508;GO:0005524;GO:0051301	K08900	opiNOG71382;opiNOG54982	O	sp|Q9CZP5|BCS1_MOUSE Mitochondrial chaperone BCS1 OS=Mus musculus GN=Bcs1l PE=1 SV=1	cell division protease ftsH	18171620	GO:0006508//proteolysis;GO:0051301//cell division;	GO:0016021//integral component of membrane;	GO:0008233//peptidase activity;GO:0005524//ATP binding;	-
CCM_02069	43.2349	20.791	-1.05624	0.0391128	0.239022	NW_006271970.1	-	-	-	-	-	hypothetical protein	18164098	-	-	-	-
CCM_07433	27.3684	5.07142	-2.43205	0.0397987	0.241829	NW_006271974.1	-	-	sordNOG12248	S	-	hypothetical protein	18169444	-	-	-	-
CCM_09114	30334	3380.96	-3.16543	0.0415192	0.247138	NW_006271976.1	GO:0055114;GO:0016627;GO:0046872	-	opiNOG05243;KOG0137	I	sp|Q8J130|TYRO_ASPFU Tyrosinase OS=Neosartorya fumigata (strain ATCC MYA-4609 / Af293 / CBS 101355 / FGSC A1100) GN=tyr1 PE=3 SV=2	Di-copper centre-containing	18171117	GO:0055114//obsolete oxidation-reduction process;	-	GO:0016627//oxidoreductase activity, acting on the CH-CH group of donors;GO:0046872//metal ion binding;	-
CCM_04957	453.171	6.58152	-6.10549	0.0432419	0.253665	NW_006271971.1	GO:0019836	-	sordNOG15189;opiNOG46950	RS	sp|Q00050|ASPH_ASPFU Asp-hemolysin OS=Neosartorya fumigata (strain ATCC MYA-4609 / Af293 / CBS 101355 / FGSC A1100) GN=AFUA_3G00590 PE=2 SV=2	Aegerolysin	18166977	GO:0019836//hemolysis by symbiont of host erythrocytes;	-	-	-
CCM_09245	229.509	72.901	-1.65454	0.0441326	0.256507	NW_006271976.1	GO:0016021	-	opiNOG27902;sordNOG06417	S	-	hypothetical protein	18171248	-	GO:0016021//integral component of membrane;	-	-
CCM_07955	51.3434	22.7063	-1.17709	0.044763	0.258137	NW_006271974.1	GO:0055085;GO:0016021	-	KOG2533;opiNOG02197;opiNOG51676	G	sp|O74923|YJ7D_SCHPO Uncharacterized transporter C757.13 OS=Schizosaccharomyces pombe (strain 972 / ATCC 24843) GN=SPCC757.13 PE=3 SV=1	vitamin H transporter, putative	18169965	GO:0055085//transmembrane transport;	GO:0016021//integral component of membrane;	-	-
CCM_06400	19.8572	7.13697	-1.47628	0.0452403	0.259542	NW_006271972.1	-	-	-	-	-	hypothetical protein	18168414	-	-	-	-
CCM_08240	10.7223	2.30063	-2.22051	0.047276	0.265479	NW_006271974.1	-	-	sorNOG08747;opiNOG17211;hypNOG12237;opiNOG60702	S	-	hypothetical protein	18170248	-	-	-	-
CCM_03566	25.3693	10.4658	-1.27739	0.0486082	0.267804	NW_006271970.1	-	-	-	-	-	hypothetical protein	18165592	-	-	-	-
CCM_01697	882.796	250.083	-1.81967	0.0494822	0.271222	NW_006271969.1	-	-	sordNOG14246;opiNOG43020;sorNOG08392	R	-	hypothetical protein	18163727	-	-	-	-
CCM_07085	733.342	274.237	-1.41906	0.0495505	0.271247	NW_006271973.1	GO:0004185;GO:0006508	-	opiNOG16370;opiNOG18368;pleNOG08261	OE	sp|C5FW30|SPCA_ARTOC Carboxypeptidase S1 homolog A OS=Arthroderma otae (strain ATCC MYA-4605 / CBS 113480) GN=SCPA PE=3 SV=1	serine carboxypeptidase, putative	18169096	GO:0006508//proteolysis;	-	GO:0004185//serine-type carboxypeptidase activity;	-
CCM_00980	13.3316	3.77564	-1.82006	0.0496877	0.271536	NW_006271969.1	-	-	-	-	-	hypothetical protein	18163013	-	-	-	-
CCM_06862	65.3621	567.323	3.11764	3.19335e-22	7.68399e-19	NW_006271973.1	GO:0005199;GO:0009277	-	eurotNOG06611;opiNOG67177	R	sp|P28346|RODL_EMENI Rodlet protein OS=Emericella nidulans (strain FGSC A4 / ATCC 38163 / CBS 112.46 / NRRL 194 / M139) GN=rodA PE=2 SV=1	Hydrophobin	18168873	-	GO:0009277//fungal-type cell wall;	GO:0005199//structural constituent of cell wall;	-
CCM_06821	10514	178746	4.08753	6.49642e-19	1.25056e-15	NW_006271973.1	-	-	euNOG57990;sordNOG12193	O	sp|P19752|HSP30_NEUCR 30 kDa heat shock protein OS=Neurospora crassa (strain ATCC 24698 / 74-OR23-1A / CBS 708.71 / DSM 1257 / FGSC 987) GN=hsp30 PE=3 SV=1	30 kDa heat shock protein	18168832	-	-	-	-
CCM_08218	43.8777	282.928	2.68887	7.37806e-15	1.18356e-11	NW_006271974.1	-	-	-	-	-	hypothetical protein	18170226	-	-	-	-
CCM_06443	1.30841	51.401	5.29591	1.56585e-12	2.15304e-09	NW_006271973.1	-	-	opiNOG57616;opiNOG10617;treNOG08390	GOR	-	WSC domain protein, putative	18168457	-	-	-	-
CCM_03788	2412.29	24180.3	3.32535	1.83947e-12	2.21311e-09	NW_006271971.1	GO:0022626;GO:0050790;GO:0000774;GO:0002181;GO:0071629;GO:0005634	K09562	sordNOG08193;sordNOG10808	O	sp|Q4I624|FES1_GIBZE Hsp70 nucleotide exchange factor FES1 OS=Gibberella zeae (strain PH-1 / ATCC MYA-4620 / FGSC 9075 / NRRL 31084) GN=FES1 PE=3 SV=1	Hsp70 nucleotide exchange factor (Fes1), putative	18165811	GO:0050790//regulation of catalytic activity;GO:0002181//cytoplasmic translation;GO:0071629//cytoplasm protein quality control by the ubiquitin-proteasome system;	GO:0022626//cytosolic ribosome;GO:0005634//nucleus;	GO:0000774//adenyl-nucleotide exchange factor activity;	ko04141(Protein processing in endoplasmic reticulum)
CCM_00889	22.0953	151.207	2.77471	4.20416e-12	4.49612e-09	NW_006271969.1	GO:0008270;GO:0016491;GO:0055114	-	sorNOG07044;COG0604	C	sp|P0DN30|RTAI1_ARTBC Probable zinc-binding oxidoreductase, mitochondrial OS=Arthroderma benhamiae (strain ATCC MYA-4681 / CBS 112371) GN=ARB_02327-2 PE=3 SV=1	zinc-binding oxidoreductase, putative	18162923	GO:0055114//obsolete oxidation-reduction process;	-	GO:0008270//zinc ion binding;GO:0016491//oxidoreductase activity;	-
CCM_08948	28.3374	225.453	2.99204	5.90694e-12	5.68543e-09	NW_006271975.1	GO:0006139	-	-	-	-	hypothetical protein	18170952	GO:0006139//nucleobase-containing compound metabolic process;	-	-	-
CCM_09039	260.593	937.278	1.84668	1.00818e-10	7.46441e-08	NW_006271975.1	GO:0006357;GO:0008270;GO:0000981;GO:0005634	-	opiNOG51980;sordNOG11848	S	sp|Q12151|UPC2_YEAST Sterol uptake control protein 2 OS=Saccharomyces cerevisiae (strain ATCC 204508 / S288c) GN=UPC2 PE=1 SV=1	C6 finger domain protein, putative	18171043	GO:0006357//regulation of transcription by RNA polymerase II;	GO:0005634//nucleus;	GO:0008270//zinc ion binding;GO:0000981//DNA-binding transcription factor activity, RNA polymerase II-specific;	-
CCM_05432	1016.88	3343.12	1.71705	3.00272e-10	2.06437e-07	NW_006271972.1	GO:0097507;GO:0004844;GO:0097509;GO:0006281;GO:0097508;GO:0005634	K20813	sordNOG04982;sorNOG04858;opiNOG03805	L	sp|O59825|TDG_SCHPO G/U mismatch-specific uracil DNA glycosylase OS=Schizosaccharomyces pombe (strain 972 / ATCC 24843) GN=thp1 PE=3 SV=1	mismatch-specific thymine-DNA glycosylase, putative	18167450	GO:0006281//DNA repair;	GO:0005634//nucleus;	GO:0097507//hypoxanthine DNA N-glycosylase activity;GO:0004844//uracil DNA N-glycosylase activity;GO:0097509//oxanine DNA N-glycosylase activity;GO:0097508//xanthine DNA N-glycosylase activity;	ko03410(Base excision repair)
CCM_02693	67.8078	338.037	2.31766	9.1106e-10	5.15821e-07	NW_006271970.1	GO:0016021;GO:0015109;GO:0015703	-	sorNOG07258;sordNOG09736;opiNOG16829	SP	-	chromate ion transporter	18164720	GO:0015703//chromate transport;	GO:0016021//integral component of membrane;	GO:0015109//chromate transmembrane transporter activity;	-
CCM_09416	132.824	491.536	1.88778	1.28137e-09	6.85179e-07	NW_006271977.1	GO:0007165	-	hypNOG04922;sordNOG08445	ST	-	Rho GTPase activation protein	18171419	GO:0007165//signal transduction;	-	-	-
CCM_09350	242.08	828.572	1.77514	1.36416e-09	6.90075e-07	NW_006271977.1	GO:0016787;GO:0051539;GO:0006284	K03575	sordNOG11758	L	sp|Q9UIF7|MUTYH_HUMAN Adenine DNA glycosylase OS=Homo sapiens GN=MUTYH PE=1 SV=1	A/G-specific adenine glycosylase	18171353	GO:0006284//base-excision repair;	-	GO:0016787//hydrolase activity;GO:0051539//4 iron, 4 sulfur cluster binding;	ko03410(Base excision repair)
CCM_03204	32.8185	321.972	3.29435	1.43392e-09	6.90075e-07	NW_006271970.1	-	-	-	-	-	hypothetical protein	18165230	-	-	-	-
CCM_06868	47.8608	207.448	2.11583	2.07272e-09	9.49998e-07	NW_006271973.1	GO:0015171;GO:0016021;GO:0003333	K16261	opiNOG05794	E	sp|P18696|PUTX_EMENI Proline-specific permease OS=Emericella nidulans (strain FGSC A4 / ATCC 38163 / CBS 112.46 / NRRL 194 / M139) GN=prnB PE=2 SV=2	glycogen branching enzyme GbeA, putative	18168879	GO:0003333//amino acid transmembrane transport;	GO:0016021//integral component of membrane;	GO:0015171//amino acid transmembrane transporter activity;	-
CCM_05564	25166	75326.1	1.58168	2.69187e-09	1.17769e-06	NW_006271972.1	-	-	-	-	-	hypothetical protein	18167582	-	-	-	-
CCM_09038	133.341	450.446	1.75624	6.23731e-09	2.50142e-06	NW_006271975.1	GO:0006950;GO:0016021	-	opiNOG56426;opiNOG16708;hypNOG06844	S	sp|P40113|RTM1_YEASX Protein RTM1 OS=Saccharomyces cerevisiae GN=RTM1 PE=3 SV=1	RTA1 like protein	18171042	GO:0006950//response to stress;	GO:0016021//integral component of membrane;	-	-
CCM_01125	111.013	378.26	1.76865	1.09165e-08	4.20286e-06	NW_006271969.1	GO:0006468;GO:0004672;GO:0005524	-	sordNOG06704;hypNOG14133;opiNOG00173	T	sp|Q91VB2|KCC1G_MOUSE Calcium/calmodulin-dependent protein kinase type 1G OS=Mus musculus GN=Camk1g PE=1 SV=1	Protein kinase-like domain	18163157	GO:0006468//protein phosphorylation;	-	GO:0004672//protein kinase activity;GO:0005524//ATP binding;	-
CCM_01264	53.7257	207.081	1.94651	1.84991e-08	6.59459e-06	NW_006271969.1	GO:0016021;GO:0055085	-	sorNOG03298;opiNOG17879;sordNOG11322	G	sp|Q5ATG7|APDF_EMENI Aspyridones efflux protein apdF OS=Emericella nidulans (strain FGSC A4 / ATCC 38163 / CBS 112.46 / NRRL 194 / M139) GN=apdF PE=2 SV=1	MFS monocarboxylate transporter, putative	18163295	GO:0055085//transmembrane transport;	GO:0016021//integral component of membrane;	-	-
CCM_04853	36.4069	213.055	2.54894	2.02824e-08	6.97207e-06	NW_006271971.1	-	-	-	-	-	hypothetical protein	18166874	-	-	-	-
CCM_07202	65.3911	311.907	2.25395	2.18659e-08	7.10774e-06	NW_006271973.1	-	-	-	-	-	hypothetical protein	18169213	-	-	-	-
CCM_02322	1.30841	33.5605	4.68087	2.2154e-08	7.10774e-06	NW_006271970.1	-	-	-	-	-	hypothetical protein	18164349	-	-	-	-
CCM_00077	281.382	846.915	1.58969	2.71704e-08	8.17234e-06	NW_006271969.1	GO:0055114;GO:0004128;GO:0016020	K00326	sordNOG10273;opiNOG20295	HC	sp|Q5BG98|MCR1_EMENI NADH-cytochrome b5 reductase 2 OS=Emericella nidulans (strain FGSC A4 / ATCC 38163 / CBS 112.46 / NRRL 194 / M139) GN=mcr1 PE=3 SV=1	NADH-cytochrome B5 reductase, putative	18162112	GO:0055114//obsolete oxidation-reduction process;	GO:0016020//membrane;	GO:0004128//cytochrome-b5 reductase activity, acting on NAD(P)H;	ko00520(Amino sugar and nucleotide sugar metabolism)
CCM_07562	6.48815	68.4986	3.40019	3.69006e-08	1.04461e-05	NW_006271974.1	-	-	-	-	-	hypothetical protein	18169573	-	-	-	-
CCM_03728	101.061	328.098	1.69891	6.63649e-08	1.68095e-05	NW_006271971.1	-	-	sordNOG15808;opiNOG57457	S	-	hypothetical protein	18165751	-	-	-	-
CCM_01528	42.6376	221.988	2.38028	7.3425e-08	1.81209e-05	NW_006271969.1	GO:0016021	-	opiNOG11343;sorNOG07567	Q	sp|Q48436|BUDC_KLEPN Diacetyl reductase [(S)-acetoin forming] OS=Klebsiella pneumoniae GN=budC PE=1 SV=2	short chain dehydrogenase	18163559	-	GO:0016021//integral component of membrane;	-	-
CCM_08690	51.3454	189.743	1.88574	8.13765e-08	1.95346e-05	NW_006271975.1	-	-	sorNOG05746;opiNOG36051;hypNOG14105	R	-	hypothetical protein	18170696	-	-	-	-
CCM_07223	72.4057	247.07	1.77075	8.73978e-08	2.00287e-05	NW_006271973.1	GO:0003676	-	opiNOG30687;sordNOG05120;opiNOG38750	S	-	hypothetical protein	18169234	-	-	GO:0003676//nucleic acid binding;	-
CCM_09491	36.4359	144.579	1.98842	1.51453e-07	3.39008e-05	NW_006271977.1	-	-	pleNOG00227;opiNOG44658	S	-	hypothetical protein	18171493	-	-	-	-
CCM_04804	132558	344785	1.37907	1.90111e-07	4.15868e-05	NW_006271971.1	GO:0005524	K03283	sordNOG10587;opiNOG02241	O	sp|Q01233|HSP70_NEUCR Heat shock 70 kDa protein OS=Neurospora crassa (strain ATCC 24698 / 74-OR23-1A / CBS 708.71 / DSM 1257 / FGSC 987) GN=hsps-1 PE=2 SV=2	heat shock 70 kDa protein	18166825	-	-	GO:0005524//ATP binding;	ko05417(Lipid and atherosclerosis);ko05162(Measles);ko05145(Toxoplasmosis);ko05134(Legionellosis);ko05020(Prion disease);ko04915(Estrogen signaling pathway);ko04612(Antigen processing and presentation);ko04213(Longevity regulating pathway - multiple species);ko04144(Endocytosis);ko04141(Protein processing in endoplasmic reticulum);ko04010(MAPK signaling pathway);ko03040(Spliceosome)
CCM_02364	1.94764	32.6084	4.06544	3.01008e-07	6.43824e-05	NW_006271970.1	-	-	sordNOG09538	S	-	hypothetical protein	18164391	-	-	-	-
CCM_06164	1879.36	4842.09	1.36539	3.50437e-07	7.33251e-05	NW_006271972.1	-	-	-	-	-	hypothetical protein	18168179	-	-	-	-
CCM_05147	14.0417	88.3534	2.65357	3.90753e-07	8.00211e-05	NW_006271972.1	GO:0003824;GO:0050662	-	opiNOG10530;sordNOG11279;sorNOG03331	VQ	sp|G3XMB9|AZAE_ASPNA Ketoreductase azaE OS=Aspergillus niger (strain ATCC 1015 / CBS 113.46 / FGSC A1144 / LSHB Ac4 / NCTC 3858a / NRRL 328 / USDA 3528.7) GN=azaE PE=2 SV=1	dihydroflavonol-4-reductase	18167166	-	-	GO:0003824//catalytic activity;GO:0050662//obsolete coenzyme binding;	-
CCM_02846	6.84545	51.1338	2.90106	4.13249e-07	8.28651e-05	NW_006271970.1	-	-	-	-	-	hypothetical protein	18164873	-	-	-	-
CCM_02298	0.978064	26.3205	4.75011	5.22138e-07	9.85407e-05	NW_006271970.1	-	-	-	-	-	hypothetical protein	18164325	-	-	-	-
CCM_05323	462.015	1212.28	1.39171	5.53027e-07	0.000100432	NW_006271972.1	-	-	opiNOG11771;hypNOG11501;necNOG10372	SR	-	hypothetical protein	18167341	-	-	-	-
CCM_06817	500.663	1516.72	1.59904	5.8397e-07	0.00010329	NW_006271973.1	GO:0008324;GO:0016021;GO:0098655	-	sordNOG07833	P	sp|Q5NA18|MTP5_ORYSJ Metal tolerance protein 5 OS=Oryza sativa subsp. japonica GN=MTP5 PE=2 SV=1	cation diffusion facilitator 10	18168828	GO:0098655//cation transmembrane transport;	GO:0016021//integral component of membrane;	GO:0008324//cation transmembrane transporter activity;	-
CCM_00852	32.588	139.793	2.10088	6.00962e-07	0.00010329	NW_006271969.1	GO:0016020;GO:0003885;GO:0055114;GO:0050660	K00103	opiNOG20479;sordNOG11168;sorNOG06846	V	sp|O81030|GGLO5_ARATH L-gulonolactone oxidase 5 OS=Arabidopsis thaliana GN=GULLO5 PE=1 SV=1	FAD/FMN-containing dehydrogenase	18162886	GO:0055114//obsolete oxidation-reduction process;	GO:0016020//membrane;	GO:0003885//D-arabinono-1,4-lactone oxidase activity;GO:0050660//flavin adenine dinucleotide binding;	ko00053(Ascorbate and aldarate metabolism)
CCM_00339	65.196	218.733	1.74631	6.60323e-07	0.000111502	NW_006271969.1	-	-	-	-	-	hypothetical protein	18162374	-	-	-	-
CCM_02149	7.48069	52.2621	2.80452	7.03834e-07	0.0001168	NW_006271970.1	GO:0006637;GO:0047617	-	opiNOG43632;sordNOG04490	S	-	acyl-CoA thioesterase	18164177	GO:0006637//acyl-CoA metabolic process;	-	GO:0047617//acyl-CoA hydrolase activity;	-
CCM_01130	223.188	602.686	1.43315	8.08026e-07	0.000131818	NW_006271969.1	GO:0009086;GO:0005737;GO:0004414	-	opiNOG03428;sordNOG07056	IE	sp|Q5AT15|SST_EMENI Serine O-succinyltransferase OS=Emericella nidulans (strain FGSC A4 / ATCC 38163 / CBS 112.46 / NRRL 194 / M139) GN=cysA PE=1 SV=1	homoserine O-acetyltransferase	18163162	GO:0009086//methionine biosynthetic process;	GO:0005737//cytoplasm;	GO:0004414//homoserine O-acetyltransferase activity;	-
CCM_04301	64.4874	205.109	1.6693	9.27799e-07	0.000144033	NW_006271971.1	-	-	fuNOG17410;opiNOG38770	S	-	hypothetical protein	18166324	-	-	-	-
CCM_08175	34.8575	239.698	2.78167	9.83679e-07	0.000150284	NW_006271974.1	-	-	-	-	-	hypothetical protein	18170184	-	-	-	-
CCM_09126	119.904	424.862	1.82511	1.44823e-06	0.000213789	NW_006271976.1	GO:0006121;GO:0005759;GO:0018293	-	sordNOG12753;sordNOG15605;opiNOG33869	S	sp|B6HRA4|SDHF2_PENRW Succinate dehydrogenase assembly factor 2, mitochondrial OS=Penicillium rubens (strain ATCC 28089 / DSM 1075 / NRRL 1951 / Wisconsin 54-1255) GN=Pc22g03150 PE=3 SV=1	TPR repeat protein	18171129	GO:0006121//mitochondrial electron transport, succinate to ubiquinone;GO:0018293//protein-FAD linkage;	GO:0005759//mitochondrial matrix;	-	-
CCM_05964	290.81	753.282	1.37312	1.5691e-06	0.000222096	NW_006271972.1	-	-	opiNOG29152;sordNOG04426	S	-	hypothetical protein	18167982	-	-	-	-
CCM_05562	493.007	1234.3	1.32401	1.6022e-06	0.000223495	NW_006271972.1	GO:0016614;GO:0016021;GO:0055114;GO:0050660	-	opiNOG54644;opiNOG17517;COG0277;opiNOG70089	CR	sp|D4B1P2|A2372_ARTBC Uncharacterized FAD-linked oxidoreductase ARB_02372 OS=Arthroderma benhamiae (strain ATCC MYA-4681 / CBS 112371) GN=ARB_02372 PE=1 SV=1	FAD binding domain protein	18167580	GO:0055114//obsolete oxidation-reduction process;	GO:0016021//integral component of membrane;	GO:0016614//oxidoreductase activity, acting on CH-OH group of donors;GO:0050660//flavin adenine dinucleotide binding;	-
CCM_02663	28.023	121.366	2.11468	1.78854e-06	0.000242461	NW_006271970.1	-	-	-	-	-	hypothetical protein	18164690	-	-	-	-
CCM_04603	502.993	1246.3	1.30904	1.92584e-06	0.000257447	NW_006271971.1	GO:0055114;GO:0016491	K00306	sordNOG05237	R	sp|O43029|FAP1_SCHPO L-pipecolate oxidase OS=Schizosaccharomyces pombe (strain 972 / ATCC 24843) GN=fap1 PE=1 SV=1	sarcosine oxidase	18166626	GO:0055114//obsolete oxidation-reduction process;	-	GO:0016491//oxidoreductase activity;	ko04146(Peroxisome);ko00310(Lysine degradation);ko00260(Glycine, serine and threonine metabolism)
CCM_01811	53.7037	172.841	1.68635	2.0909e-06	0.000275684	NW_006271969.1	GO:0016747;GO:0006633	K09458	sordNOG07191	H	sp|Q8L3X9|KASM_ARATH 3-oxoacyl-[acyl-carrier-protein] synthase, mitochondrial OS=Arabidopsis thaliana GN=KAS PE=1 SV=1	3-oxoacyl-(acyl-carrier-protein) synthase 2	18163841	GO:0006633//fatty acid biosynthetic process;	-	GO:0016747//acyltransferase activity, transferring groups other than amino-acyl groups;	ko00780(Biotin metabolism);ko00061(Fatty acid biosynthesis)
CCM_00340	944.527	5644.07	2.57907	2.13139e-06	0.000277225	NW_006271969.1	GO:0005737;GO:0006629;GO:0055114;GO:0016021;GO:0016627	-	sordNOG09295;opiNOG04155	SR	-	membrane protein, putative	18162375	GO:0006629//lipid metabolic process;GO:0055114//obsolete oxidation-reduction process;	GO:0005737//cytoplasm;GO:0016021//integral component of membrane;	GO:0016627//oxidoreductase activity, acting on the CH-CH group of donors;	-
CCM_06816	41.704	197.709	2.24512	2.71111e-06	0.000347926	NW_006271973.1	-	-	-	-	-	hypothetical protein	18168827	-	-	-	-
CCM_01166	10.0885	178.065	4.14161	2.75451e-06	0.000348844	NW_006271969.1	GO:0016021;GO:0022891;GO:0055085	K08139	opiNOG00669	R	sp|P18631|RAG1_KLULA Low-affinity glucose transporter OS=Kluyveromyces lactis (strain ATCC 8585 / CBS 2359 / DSM 70799 / NBRC 1267 / NRRL Y-1140 / WM37) GN=RAG1 PE=1 SV=1	siderophore iron transporter mirC	18163198	GO:0055085//transmembrane transport;	GO:0016021//integral component of membrane;	-	ko04113(Meiosis - yeast)
CCM_04010	182.033	476.905	1.3895	2.80063e-06	0.000350079	NW_006271971.1	-	-	sordNOG07077;opiNOG07066	S	sp|Q5EA37|CC130_BOVIN Coiled-coil domain-containing protein 130 OS=Bos taurus GN=CCDC130 PE=2 SV=1	DUF572 domain-containing protein	18166033	-	-	-	-
CCM_01457	1728.02	17331	3.32617	2.94379e-06	0.000359746	NW_006271969.1	-	-	sorNOG04957;sordNOG13280;opiNOG36609	S	-	hypothetical protein	18163488	-	-	-	-
CCM_02741	2045.33	4838.23	1.24215	2.95272e-06	0.000359746	NW_006271970.1	-	-	hypNOG06251;opiNOG22413	S	-	hypothetical protein	18164768	-	-	-	-
CCM_05629	71.3708	209.708	1.55498	3.04967e-06	0.000361486	NW_006271972.1	-	-	-	-	-	hypothetical protein	18167647	-	-	-	-
CCM_06384	445.526	1285.61	1.52887	3.07244e-06	0.000361486	NW_006271972.1	-	K17867	opiNOG37509;hypNOG02006	O	sp|Q4I7G0|DPH4_GIBZE Diphthamide biosynthesis protein 4 OS=Gibberella zeae (strain PH-1 / ATCC MYA-4620 / FGSC 9075 / NRRL 31084) GN=DPH4 PE=3 SV=2	DnaJ domain protein	18168398	-	-	-	-
CCM_00183	29.6818	128.691	2.11627	3.07968e-06	0.000361486	NW_006271969.1	GO:0016853;GO:0005737;GO:0009072	K01800	opiNOG09837	E	sp|O43123|MAAI_EMENI Maleylacetoacetate isomerase OS=Emericella nidulans (strain FGSC A4 / ATCC 38163 / CBS 112.46 / NRRL 194 / M139) GN=maiA PE=1 SV=1	maleylacetoacetate isomerase MaiA	18162218	GO:0009072//aromatic amino acid family metabolic process;	GO:0005737//cytoplasm;	GO:0016853//isomerase activity;	ko00643(Styrene degradation);ko00350(Tyrosine metabolism)
CCM_00326	48.1372	222.516	2.20868	3.1922e-06	0.00037018	NW_006271969.1	GO:0006508;GO:0008237	-	opiNOG10620;NOG01632;opiNOG57147	SRO	sp|Q871C5|MEP1_NEUCR Extracellular metalloprotease NCU07200 OS=Neurospora crassa (strain ATCC 24698 / 74-OR23-1A / CBS 708.71 / DSM 1257 / FGSC 987) GN=B8G12.220 PE=3 SV=1	metalloprotease MEP1-like protein	18162361	GO:0006508//proteolysis;	-	GO:0008237//metallopeptidase activity;	-
CCM_01710	1487.81	3950.66	1.40891	3.43721e-06	0.000393847	NW_006271969.1	GO:0008270;GO:0006351	-	sordNOG12127	K	sp|Q6C0K9|BYE1_YARLI Transcription factor BYE1 OS=Yarrowia lipolytica (strain CLIB 122 / E 150) GN=BYE1 PE=3 SV=1	PHD finger domain protein, putative	18163740	GO:0006351//transcription, DNA-templated;	-	GO:0008270//zinc ion binding;	-
CCM_06852	15.6361	71.9161	2.20144	3.65434e-06	0.000413801	NW_006271973.1	-	-	-	-	-	hypothetical protein	18168863	-	-	-	-
CCM_00803	14.3556	67.8491	2.24072	3.85981e-06	0.00042702	NW_006271969.1	GO:0000981;GO:0005634;GO:0008270;GO:0006357	-	opiNOG18313;sacNOG05611;opiNOG15410	SK	sp|Q08904|RDR1_YEAST Protein RDR1 OS=Saccharomyces cerevisiae (strain ATCC 204508 / S288c) GN=RDR1 PE=4 SV=1	transcriptional repressor involved in the control of multidrug resistance	18162837	GO:0006357//regulation of transcription by RNA polymerase II;	GO:0005634//nucleus;	GO:0000981//DNA-binding transcription factor activity, RNA polymerase II-specific;GO:0008270//zinc ion binding;	-
CCM_03840	486.661	1184.95	1.28384	3.91398e-06	0.000428091	NW_006271971.1	GO:0016573;GO:0006348;GO:0000781;GO:0000790;GO:0004402;GO:0043486;GO:0033255	-	sordNOG11391	B	sp|P40963|SAS2_YEAST Histone acetyltransferase SAS2 OS=Saccharomyces cerevisiae (strain ATCC 204508 / S288c) GN=SAS2 PE=1 SV=1	histone acetyltransferase MYST2	18165863	GO:0016573//histone acetylation;GO:0043486//histone exchange;	GO:0000781//chromosome, telomeric region;GO:0033255//SAS acetyltransferase complex;	GO:0004402//histone acetyltransferase activity;	-
CCM_05853	122.996	1298.71	3.40039	4.04824e-06	0.000432088	NW_006271972.1	-	-	hypNOG02493;necNOG13540	S	-	hypothetical protein	18167871	-	-	-	-
CCM_06826	305.225	1038.75	1.7669	4.08603e-06	0.000432088	NW_006271973.1	GO:0016021	-	sordNOG13218;opiNOG41383;sordNOG15718;necNOG05051	R	-	hypothetical protein	18168837	-	GO:0016021//integral component of membrane;	-	-
CCM_06614	772.504	5533.12	2.84048	4.11723e-06	0.000432088	NW_006271973.1	GO:0008171;GO:0032259	K00545	sordNOG12153;opiNOG06845;pleNOG03874	Q	sp|Q8NKC1|COMT2_SCHPO Probable catechol O-methyltransferase 2 OS=Schizosaccharomyces pombe (strain 972 / ATCC 24843) GN=SPBPB21E7.04c PE=3 SV=1	catechol O-methyltransferase	18168628	GO:0032259//methylation;	-	GO:0008171//O-methyltransferase activity;	ko04728(Dopaminergic synapse);ko00965(Betalain biosynthesis);ko00350(Tyrosine metabolism);ko00140(Steroid hormone biosynthesis)
CCM_05120	64.9221	193.926	1.57873	4.17498e-06	0.000432088	NW_006271972.1	-	-	COG3391	S	-	40-residue YVTN family beta-propeller repeat protein	18167140	-	-	-	-
CCM_06810	531.455	1398.25	1.3956	6.1903e-06	0.000626207	NW_006271973.1	GO:0004527;GO:0090305;GO:0003676	K14570	sordNOG09517	L	sp|O94443|YFE9_SCHPO Uncharacterized exonuclease C637.09 OS=Schizosaccharomyces pombe (strain 972 / ATCC 24843) GN=SPAC637.09 PE=3 SV=2	exonuclease	18168821	GO:0090305//nucleic acid phosphodiester bond hydrolysis;	-	GO:0004527//exonuclease activity;GO:0003676//nucleic acid binding;	ko03008(Ribosome biogenesis in eukaryotes)
CCM_09213	128.586	338.096	1.3947	6.2458e-06	0.000626207	NW_006271976.1	GO:0008654;GO:0004609	K01613	sordNOG06687	I	sp|P0DPA6|PSID_PSICU L-tryptophan decarboxylase psiD OS=Psilocybe cubensis GN=psiD PE=1 SV=1	phosphatidylserine decarboxylase family protein	18171216	GO:0008654//phospholipid biosynthetic process;	-	GO:0004609//phosphatidylserine decarboxylase activity;	ko00564(Glycerophospholipid metabolism)
CCM_08930	122.914	334.352	1.44371	6.52446e-06	0.000634443	NW_006271975.1	GO:0016021	-	sordNOG08314	S	-	hypothetical protein	18170935	-	GO:0016021//integral component of membrane;	-	-
CCM_06636	13.0157	62.3932	2.26113	6.5257e-06	0.000634443	NW_006271973.1	-	-	opiNOG28819;sorNOG04740	S	-	hypothetical protein	18168650	-	-	-	-
CCM_07672	109.085	327.013	1.5839	7.04296e-06	0.000674017	NW_006271974.1	GO:0016021	-	sordNOG11131;sorNOG06620;opiNOG01001	S	-	hypothetical protein	18169682	-	GO:0016021//integral component of membrane;	-	-
CCM_05561	34.8136	117	1.74879	7.91298e-06	0.000739441	NW_006271972.1	GO:0003824	-	-	-	-	hypothetical protein	18167579	-	-	GO:0003824//catalytic activity;	-
CCM_01498	3714.3	10196.4	1.45689	8.56389e-06	0.000785024	NW_006271969.1	GO:0016021	-	opiNOG20622;sordNOG07415	S	-	hypothetical protein	18163529	-	GO:0016021//integral component of membrane;	-	-
CCM_03509	309.873	736.481	1.24897	8.94566e-06	0.000802028	NW_006271970.1	GO:0016787	-	opiNOG02498	S	sp|D4AS70|FAE1_ARTBC Probable feruloyl esterase ARB_07085 OS=Arthroderma benhamiae (strain ATCC MYA-4681 / CBS 112371) GN=ARB_07085 PE=1 SV=1	feruloyl esterase, putative	18165535	-	-	GO:0016787//hydrolase activity;	-
CCM_02644	2243.39	6538.6	1.5433	8.99938e-06	0.000802028	NW_006271970.1	-	-	sordNOG11483	S	-	leucine rich repeat protein	18164671	-	-	-	-
CCM_04883	6.49964	54.7506	3.07444	9.11617e-06	0.000803255	NW_006271971.1	GO:0016021	-	-	-	-	hypothetical protein	18166904	-	GO:0016021//integral component of membrane;	-	-
CCM_08387	23.4391	88.5552	1.91766	9.18005e-06	0.000803255	NW_006271975.1	-	-	-	-	-	hypothetical protein	18170395	-	-	-	-
CCM_08447	434.408	1024.6	1.23793	9.56817e-06	0.000829672	NW_006271975.1	GO:0006364;GO:0019013;GO:0034457;GO:0005732	K14559	opiNOG77542;sordNOG05011	A	sp|O13910|MPP10_SCHPO U3 small nucleolar ribonucleoprotein protein mpp10 OS=Schizosaccharomyces pombe (strain 972 / ATCC 24843) GN=mpp10 PE=1 SV=1	U3 small nucleolar ribonucleoprotein Mpp10	18170454	GO:0006364//rRNA processing;	GO:0019013//viral nucleocapsid;GO:0034457//Mpp10 complex;GO:0005732//sno(s)RNA-containing ribonucleoprotein complex;	-	ko03008(Ribosome biogenesis in eukaryotes)
CCM_07905	195.964	485.661	1.30936	9.98287e-06	0.000857903	NW_006271974.1	-	-	-	-	-	hypothetical protein	18169915	-	-	-	-
CCM_02432	225.746	909.695	2.01068	1.01532e-05	0.000864818	NW_006271970.1	-	-	opiNOG50536	S	-	hypothetical protein	18164459	-	-	-	-
CCM_01035	619.683	1446.48	1.22294	1.04269e-05	0.000880337	NW_006271969.1	GO:0016021	-	hypNOG07538;opiNOG41585;sordNOG14902;sordNOG15816	S	sp|Q4WQY6|TPCL_ASPFU Anthrone oxygenase tpcL OS=Neosartorya fumigata (strain ATCC MYA-4609 / Af293 / CBS 101355 / FGSC A1100) GN=tpcL PE=2 SV=2	hypothetical protein	18163068	-	GO:0016021//integral component of membrane;	-	-
CCM_04189	2492.5	10966.3	2.13741	1.05364e-05	0.000881849	NW_006271971.1	GO:0055085;GO:0016021	-	sordNOG05374	R	sp|Q6UEH3|AFLT_ASPPU Efflux pump aflT OS=Aspergillus parasiticus (strain ATCC 56775 / NRRL 5862 / SRRC 143 / SU-1) GN=aflT PE=2 SV=1	efflux pump antibiotic resistance protein, putative	18166212	GO:0055085//transmembrane transport;	GO:0016021//integral component of membrane;	-	-
CCM_04346	3.27552	42.6871	3.704	1.17955e-05	0.000978723	NW_006271971.1	-	-	-	-	-	hypothetical protein	18166369	-	-	-	-
CCM_06319	5.53355	46.7884	3.07987	1.22572e-05	0.00100834	NW_006271972.1	GO:0005524;GO:0006468;GO:0004674	K08286	sordNOG04096	T	sp|P0C1B1|CBK1_EMENI Serine/threonine-protein kinase cbk1 OS=Emericella nidulans (strain FGSC A4 / ATCC 38163 / CBS 112.46 / NRRL 194 / M139) GN=cbk1 PE=3 SV=2	Protein kinase-like domain	18168333	GO:0006468//protein phosphorylation;	-	GO:0005524//ATP binding;GO:0004674//protein serine/threonine kinase activity;	-
CCM_08725	244.231	608.458	1.31691	1.25977e-05	0.00102756	NW_006271975.1	GO:0016787	-	sordNOG11978;opiNOG16393;pleNOG07953;saccNOG05261	I	sp|Q6CGL4|APTH1_YARLI Acyl-protein thioesterase 1 OS=Yarrowia lipolytica (strain CLIB 122 / E 150) GN=YALI0A18337g PE=3 SV=1	acyl-protein thioesterase 1	18170731	-	-	GO:0016787//hydrolase activity;	-
CCM_00894	39.0911	124.475	1.67094	1.29417e-05	0.00102945	NW_006271969.1	GO:0016740	-	NOG111989;sordNOG10097	S	sp|P41929|LYC1_YARLI Lysine acetyltransferase OS=Yarrowia lipolytica (strain CLIB 122 / E 150) GN=LYC1 PE=4 SV=2	GNAT family acetyltransferase, putative	18162928	-	-	GO:0016740//transferase activity;	-
CCM_09392	265.282	690.845	1.38084	1.39351e-05	0.00109045	NW_006271977.1	GO:0008168;GO:0032259	-	NOG77321;opiNOG22420;opiNOG79492;NOG00993	ISR	sp|Q9KJ20|GSDMT_ACTHA Glycine/sarcosine/dimethylglycine N-methyltransferase OS=Actinopolyspora halophila PE=1 SV=1	methyl transferase-like protein	18171395	GO:0032259//methylation;	-	GO:0008168//methyltransferase activity;	-
CCM_08083	757.466	1719.27	1.18254	1.51714e-05	0.0011682	NW_006271974.1	-	-	opiNOG58850	S	-	hypothetical protein	18170092	-	-	-	-
CCM_06135	76.5595	206.085	1.42858	1.72729e-05	0.00131945	NW_006271972.1	-	K20465	sordNOG10972	T	sp|O94512|OBP1_SCHPO Oxysterol-binding protein-like protein 1 OS=Schizosaccharomyces pombe (strain 972 / ATCC 24843) GN=obp1 PE=1 SV=1	oxysterol binding protein (Orp8), putative	18168150	-	-	-	-
CCM_00618	33.6389	115.593	1.78085	1.80998e-05	0.00137173	NW_006271969.1	-	-	opiNOG55163	R	-	hypothetical protein	18162653	-	-	-	-
CCM_03441	238.155	562.597	1.2402	1.93833e-05	0.00143511	NW_006271970.1	-	-	necNOG13772;opiNOG42636;sordNOG14725	SR	-	siderophore biosynthesis enzyme, putative	18165467	-	-	-	-
CCM_02557	90.7564	307.295	1.75955	2.00254e-05	0.00147133	NW_006271970.1	GO:0008168;GO:0006281;GO:0032259	K00567	opiNOG44580;sorNOG08070	SL	sp|O74023|OGT_THEKO Methylated-DNA--protein-cysteine methyltransferase OS=Thermococcus kodakarensis (strain ATCC BAA-918 / JCM 12380 / KOD1) GN=ogt PE=1 SV=1	methylated-DNA--protein-cysteine methyltransferase, putative	18164584	GO:0006281//DNA repair;GO:0032259//methylation;	-	GO:0008168//methyltransferase activity;	-
CCM_01265	60.113	237.773	1.98383	2.07812e-05	0.00150391	NW_006271969.1	GO:0016491;GO:0010181;GO:0055114	-	sorNOG00032;sordNOG10453;opiNOG27957	HSR	sp|Q01358|BLI3_NEUCR Protein bli-3 OS=Neurospora crassa (strain ATCC 24698 / 74-OR23-1A / CBS 708.71 / DSM 1257 / FGSC 987) GN=bli-3 PE=2 SV=1	protein bli-3	18163296	GO:0055114//obsolete oxidation-reduction process;	-	GO:0016491//oxidoreductase activity;GO:0010181//FMN binding;	-
CCM_00838	72.0245	193.671	1.42705	2.14053e-05	0.00153751	NW_006271969.1	-	-	sorNOG02049;opiNOG32383	S	-	hypothetical protein	18162872	-	-	-	-
CCM_09041	30354.7	65851.7	1.1173	2.17213e-05	0.00154865	NW_006271975.1	GO:0008152;GO:0016874	-	sordNOG13532;sorNOG06812;opiNOG29960	I	sp|Q42982|4CL2_ORYSJ Probable 4-coumarate--CoA ligase 2 OS=Oryza sativa subsp. japonica GN=4CL2 PE=2 SV=2	AMP dependent CoA ligase, putative	18171045	GO:0008152//metabolic process;	-	GO:0016874//ligase activity;	-
CCM_02009	800.619	3546.86	2.14735	2.25498e-05	0.0015959	NW_006271970.1	-	-	sordNOG14882	L	-	hypothetical protein	18164038	-	-	-	-
CCM_09656	136.12	334.306	1.29629	2.50662e-05	0.0017357	NW_006271978.1	GO:0016021	-	sordNOG07363	E	sp|P38680|MTR_NEUCR N amino acid transport system protein OS=Neurospora crassa (strain ATCC 24698 / 74-OR23-1A / CBS 708.71 / DSM 1257 / FGSC 987) GN=mtr PE=3 SV=2	amino acid transporter	18171658	-	GO:0016021//integral component of membrane;	-	-
CCM_01732	566.043	1253.87	1.1474	3.1378e-05	0.00214194	NW_006271969.1	-	-	necNOG11343;hypNOG05652	S	-	hypothetical protein	18163762	-	-	-	-
CCM_06911	751.366	2337.97	1.63767	3.21208e-05	0.0021772	NW_006271973.1	GO:0015171;GO:0016021;GO:0003333	K16261	opiNOG05794;NOG27385;onyNOG01044	EU	sp|P18696|PUTX_EMENI Proline-specific permease OS=Emericella nidulans (strain FGSC A4 / ATCC 38163 / CBS 112.46 / NRRL 194 / M139) GN=prnB PE=2 SV=2	proline permease PrnB	18168922	GO:0003333//amino acid transmembrane transport;	GO:0016021//integral component of membrane;	GO:0015171//amino acid transmembrane transporter activity;	-
CCM_05450	717.268	1565.41	1.12596	3.32377e-05	0.00222162	NW_006271972.1	GO:0016021;GO:0055114;GO:0016620	-	KOG2450;opiNOG05724	C	sp|O05619|VDH_PSEUH Vanillin dehydrogenase OS=Pseudomonas sp. (strain HR199 / DSM 7063) GN=vdh PE=1 SV=1	aldehyde dehydrogenase family protein	18167468	GO:0055114//obsolete oxidation-reduction process;	GO:0016021//integral component of membrane;	GO:0016620//oxidoreductase activity, acting on the aldehyde or oxo group of donors, NAD or NADP as acceptor;	-
CCM_03984	3.58391	31.7356	3.1465	3.37094e-05	0.00223761	NW_006271971.1	-	-	-	-	-	hypothetical protein	18166007	-	-	-	-
CCM_08576	144.615	899.353	2.63667	3.75661e-05	0.00244306	NW_006271975.1	GO:0005759;GO:0034553	-	sordNOG14335;opiNOG41540	S	sp|P38345|SDHF4_YEAST Succinate dehydrogenase assembly factor 4, mitochondrial OS=Saccharomyces cerevisiae (strain ATCC 204508 / S288c) GN=SDH8 PE=1 SV=2	FMP21-like protein	18170582	GO:0034553//mitochondrial respiratory chain complex II assembly;	GO:0005759//mitochondrial matrix;	-	-
CCM_08807	24.0729	103.907	2.10981	4.06437e-05	0.00260797	NW_006271975.1	-	-	-	-	-	hypothetical protein	18170812	-	-	-	-
CCM_05046	503.993	3856.89	2.93596	4.2853e-05	0.00271202	NW_006271972.1	GO:0055085;GO:0016021	-	sordNOG04294	R	sp|I1RF56|AURT_GIBZE Rubrofusarin-specific efflux pump aurT OS=Gibberella zeae (strain PH-1 / ATCC MYA-4620 / FGSC 9075 / NRRL 31084) GN=aurT PE=2 SV=1	MFS toxin efflux pump (AflT)	18167066	GO:0055085//transmembrane transport;	GO:0016021//integral component of membrane;	-	-
CCM_09208	4190.37	8870.52	1.08194	4.31105e-05	0.00271202	NW_006271976.1	GO:0004037;GO:0000256	K01477	sorNOG01663;opiNOG00319;opiNOG06793	RF	sp|P18407|ALLC_NEUCR Allantoicase OS=Neurospora crassa (strain ATCC 24698 / 74-OR23-1A / CBS 708.71 / DSM 1257 / FGSC 987) GN=alc-1 PE=2 SV=2	allantoicase	18171211	GO:0000256//allantoin catabolic process;	-	GO:0004037//allantoicase activity;	ko00230(Purine metabolism)
CCM_01106	927.633	1995.52	1.10514	4.54168e-05	0.00283437	NW_006271969.1	GO:0046872;GO:0003676	-	sordNOG12835;opiNOG38077;sorNOG05040	KR	-	C2H2 transcription factor (Egr2), putative	18163139	-	-	GO:0046872//metal ion binding;GO:0003676//nucleic acid binding;	-
CCM_08557	50.1667	141.255	1.49349	4.56444e-05	0.00283437	NW_006271975.1	GO:0016021	-	-	-	-	hypothetical protein	18170564	-	GO:0016021//integral component of membrane;	-	-
CCM_06385	203.387	469.593	1.20719	4.67981e-05	0.00285314	NW_006271972.1	GO:0005762;GO:0003735	K17438	opiNOG31790;sordNOG10761	SJ	sp|P23369|RM25_YEAST 54S ribosomal protein L25, mitochondrial OS=Saccharomyces cerevisiae (strain ATCC 204508 / S288c) GN=MRPL25 PE=1 SV=2	hypothetical protein	18168399	-	GO:0005762//mitochondrial large ribosomal subunit;	GO:0003735//structural constituent of ribosome;	-
CCM_00304	162.668	381.585	1.23008	4.68359e-05	0.00285314	NW_006271969.1	GO:0008152;GO:0016787	-	opiNOG17662;COG0657	VI	sp|Q01109|BAH_STRHY Acetyl-hydrolase OS=Streptomyces hygroscopicus GN=bah PE=3 SV=3	lipase/esterase, putative	18162339	GO:0008152//metabolic process;	-	GO:0016787//hydrolase activity;	-
CCM_05075	73.4826	191.743	1.3837	4.73183e-05	0.00286439	NW_006271972.1	-	-	-	-	-	hypothetical protein	18167095	-	-	-	-
CCM_09682	113.732	283.18	1.31608	4.89362e-05	0.00294382	NW_006271972.1	GO:0070635;GO:0034356;GO:0006218;GO:0070636;GO:0019358;GO:0008655;GO:0006216;GO:0045437;GO:0030433	K01240	sordNOG09039	F	sp|Q04179|URH1_YEAST Uridine nucleosidase OS=Saccharomyces cerevisiae (strain ATCC 204508 / S288c) GN=URH1 PE=1 SV=2	Adenosine nucleosidase	18171684	GO:0034356//NAD biosynthesis via nicotinamide riboside salvage pathway;GO:0006218//uridine catabolic process;GO:0019358//nicotinate nucleotide salvage;GO:0008655//pyrimidine-containing compound salvage;GO:0006216//cytidine catabolic process;GO:0030433//ubiquitin-dependent ERAD pathway;	-	GO:0070635//nicotinamide riboside hydrolase activity;GO:0070636//nicotinic acid riboside hydrolase activity;GO:0045437//uridine nucleosidase activity;	ko00760(Nicotinate and nicotinamide metabolism);ko00240(Pyrimidine metabolism)
CCM_07509	734.163	7034.93	3.26036	4.93731e-05	0.00295165	NW_006271974.1	-	-	opiNOG39261	S	-	hypothetical protein	18169520	-	-	-	-
CCM_09192	41.0363	120.364	1.55244	5.01687e-05	0.0029807	NW_006271976.1	-	-	opiNOG35785;opiNOG43706;pleNOG05359	S	sp|Q9CWV6|PKRI1_MOUSE PRKR-interacting protein 1 OS=Mus musculus GN=Prkrip1 PE=1 SV=2	DUF1168 domain protein	18171195	-	-	-	-
CCM_07590	4.23262	30.8017	2.86339	5.23398e-05	0.00309062	NW_006271974.1	-	-	opiNOG32199;sordNOG12865	R	-	hypothetical protein	18169601	-	-	-	-
CCM_05563	277.884	619.802	1.15732	5.56324e-05	0.00324722	NW_006271972.1	GO:0008233;GO:0006508	K06910	eurotNOG12592;sorNOG05882;opiNOG57863;opiNOG74177	R	-	protease inhibitor (Tfs1), putative	18167581	GO:0006508//proteolysis;	-	GO:0008233//peptidase activity;	-
CCM_03985	15.3516	62.0174	2.01428	5.58448e-05	0.00324722	NW_006271971.1	-	-	-	-	-	hypothetical protein	18166008	-	-	-	-
CCM_06620	16.3402	62.5698	1.93704	5.60041e-05	0.00324722	NW_006271973.1	GO:0055085;GO:0016021	-	opiNOG19324	R	sp|O59726|FNX2_SCHPO Vacuolar membrane amino acid uptake transporter fnx2 OS=Schizosaccharomyces pombe (strain 972 / ATCC 24843) GN=fnx2 PE=3 SV=1	multidrug resistance protein fnx1, putative	18168634	GO:0055085//transmembrane transport;	GO:0016021//integral component of membrane;	-	-
CCM_03585	180.804	513.356	1.50554	5.7897e-05	0.00333688	NW_006271970.1	-	-	hypNOG14200;sorNOG08558;sordNOG14926	S	-	hypothetical protein	18165611	-	-	-	-
CCM_00908	4006.5	9884.03	1.30276	5.943e-05	0.00339401	NW_006271969.1	-	-	sordNOG12450;magNOG12254	S	-	period circadian protein, putative	18162942	-	-	-	-
CCM_03437	28.305	89.9544	1.66814	5.95935e-05	0.00339401	NW_006271970.1	GO:0055114;GO:0008270;GO:0016491	-	opiNOG22572;sordNOG11582	Q	sp|P42327|ADH2_GEOSE Alcohol dehydrogenase OS=Geobacillus stearothermophilus GN=adh PE=1 SV=1	NADP-dependent alcohol dehydrogenase	18165463	GO:0055114//obsolete oxidation-reduction process;	-	GO:0008270//zinc ion binding;GO:0016491//oxidoreductase activity;	-
CCM_03425	194.837	443.541	1.1868	6.03163e-05	0.00340361	NW_006271970.1	GO:0009249;GO:0005739;GO:0016874;GO:0016415;GO:0009107	K23735	sordNOG12907;opiNOG25643	H	sp|O36017|LIPB_SCHPO Probable octanoyltransferase OS=Schizosaccharomyces pombe (strain 972 / ATCC 24843) GN=SPAC4F10.05c PE=3 SV=1	Lipoyltransferase, putative	18165451	GO:0009249//protein lipoylation;GO:0009107//lipoate biosynthetic process;	GO:0005739//mitochondrion;	GO:0016874//ligase activity;GO:0016415//octanoyltransferase activity;	ko00785(Lipoic acid metabolism)
CCM_06772	617.324	1330.22	1.10756	6.07921e-05	0.00340361	NW_006271973.1	-	-	hypNOG09902;sordNOG06478;opiNOG17533	S	-	hypothetical protein	18168785	-	-	-	-
CCM_01657	264.24	580.291	1.13493	7.32442e-05	0.00398291	NW_006271969.1	-	-	sordNOG14812	S	-	hypothetical protein	18163687	-	-	-	-
CCM_09042	47338.4	96872.7	1.03308	7.41342e-05	0.00400866	NW_006271975.1	GO:0031177;GO:0016740;GO:0008152	-	COG3321;opiNOG54134	QI	sp|Q5SBL6|FSDS_FUSHE Fusaridione A synthetase fsdS OS=Fusarium heterosporum GN=fsdS PE=3 SV=2	polyketide synthase, putative	18171046	GO:0008152//metabolic process;	-	GO:0031177//phosphopantetheine binding;GO:0016740//transferase activity;	-
CCM_08606	112.945	269.112	1.25258	7.67929e-05	0.00408076	NW_006271975.1	GO:0009058;GO:0008483;GO:0030170	K00652	opiNOG06976;sordNOG11782;sorNOG07625	HE	sp|Q1DCV8|BIOF_MYXXD 8-amino-7-oxononanoate synthase OS=Myxococcus xanthus (strain DK 1622) GN=bioF PE=3 SV=1	aminotransferase, putative	18170612	GO:0009058//biosynthetic process;	-	GO:0008483//transaminase activity;GO:0030170//pyridoxal phosphate binding;	ko00780(Biotin metabolism)
CCM_08914	7867.89	29804.3	1.92147	7.71634e-05	0.00408076	NW_006271975.1	-	-	opiNOG44440;sordNOG14340;sordNOG15755	SR	-	WW/Rsp5/WWP	18170919	-	-	-	-
CCM_05476	2020.98	5423.43	1.42415	8.05313e-05	0.00421257	NW_006271972.1	-	-	sordNOG13916;opiNOG44854	S	-	hypothetical protein	18167494	-	-	-	-
CCM_09343	25.6348	82.1182	1.6796	8.79324e-05	0.00455027	NW_006271977.1	-	-	hypNOG01855;sordNOG06640	S	-	hypothetical protein	18171346	-	-	-	-
CCM_00269	53.4387	157.606	1.56036	8.8729e-05	0.00455437	NW_006271969.1	-	-	sordNOG09504;opiNOG35390	S	-	hypothetical protein	18162304	-	-	-	-
CCM_09274	210.75	511.59	1.27945	8.8958e-05	0.00455437	NW_006271976.1	GO:0005783;GO:0005635;GO:0016021	-	sordNOG12053;opiNOG01803	Q	sp|O13822|YEE6_SCHPO Uncharacterized oxidoreductase C19A8.06 OS=Schizosaccharomyces pombe (strain 972 / ATCC 24843) GN=SPAC19A8.06 PE=3 SV=1	short chain dehydrogenase/reductase family	18171277	-	GO:0005783//endoplasmic reticulum;GO:0005635//nuclear envelope;GO:0016021//integral component of membrane;	-	-
CCM_05273	892.561	1864.16	1.0625	8.98956e-05	0.00457802	NW_006271972.1	GO:0016021;GO:0004497;GO:0055114	-	opiNOG16070;sordNOG04612;hypNOG00974	S	-	Monooxygenase	18167292	GO:0055114//obsolete oxidation-reduction process;	GO:0016021//integral component of membrane;	GO:0004497//monooxygenase activity;	-
CCM_07508	16616.9	131153	2.98053	9.57106e-05	0.00482311	NW_006271974.1	GO:0051787;GO:0042026;GO:0005635;GO:0043335;GO:0005524;GO:0005829;GO:0019538;GO:0016887;GO:0071218	K03695	opiNOG02314;sordNOG08779	O	sp|P31540|HSP98_NEUCR Heat shock protein hsp98 OS=Neurospora crassa (strain ATCC 24698 / 74-OR23-1A / CBS 708.71 / DSM 1257 / FGSC 987) GN=hsp98 PE=1 SV=2	heat shock protein HSP98	18169519	GO:0042026//protein refolding;GO:0043335//protein unfolding;GO:0019538//protein metabolic process;GO:0071218//cellular response to misfolded protein;	GO:0005635//nuclear envelope;GO:0005829//cytosol;	GO:0051787//misfolded protein binding;GO:0005524//ATP binding;GO:0016887//ATP hydrolysis activity;	ko04213(Longevity regulating pathway - multiple species)
CCM_00243	14.3296	55.7445	1.95983	9.79197e-05	0.00490873	NW_006271969.1	-	-	sordNOG13631	S	sp|D4B3I5|A3024_ARTBC Extracellular serine-rich protein ARB_03024 OS=Arthroderma benhamiae (strain ATCC MYA-4681 / CBS 112371) GN=ARB_03024 PE=1 SV=1	extracellular serine-rich protein	18162278	-	-	-	-
CCM_06110	205.769	1090.78	2.40626	0.000102027	0.00506189	NW_006271972.1	-	-	-	-	-	hypothetical protein	18168125	-	-	-	-
CCM_05720	99.0076	523.446	2.40243	0.000106089	0.00520103	NW_006271972.1	GO:0016021	-	opiNOG08017	S	-	hypothetical protein	18167738	-	GO:0016021//integral component of membrane;	-	-
CCM_07352	1125.2	2311.3	1.03853	0.000113081	0.00544202	NW_006271974.1	GO:0016021;GO:0055085	-	sordNOG04251	R	sp|G3XMC9|AZAK_ASPNA Efflux pump azaK OS=Aspergillus niger (strain ATCC 1015 / CBS 113.46 / FGSC A1144 / LSHB Ac4 / NCTC 3858a / NRRL 328 / USDA 3528.7) GN=azaK PE=2 SV=1	Major facilitator superfamily transporter	18169363	GO:0055085//transmembrane transport;	GO:0016021//integral component of membrane;	-	-
CCM_07911	45.5498	124.413	1.44962	0.000119241	0.0057099	NW_006271974.1	GO:0006412;GO:0005840;GO:0003735	K02914	sorNOG05962;sordNOG15297	J	-	hypothetical protein	18169921	GO:0006412//translation;	GO:0005840//ribosome;	GO:0003735//structural constituent of ribosome;	ko03010(Ribosome)
CCM_03549	995.018	2039.95	1.03574	0.000119958	0.00571583	NW_006271970.1	GO:0001403;GO:0018117;GO:0005634;GO:0005829;GO:0004792;GO:0032447;GO:0070733;GO:0002143;GO:0034599;GO:0042292;GO:0005524;GO:0007114;GO:2000220;GO:0018192	K11996	opiNOG00781	H	sp|A4RPM5|UBA4_MAGO7 Adenylyltransferase and sulfurtransferase uba4 OS=Magnaporthe oryzae (strain 70-15 / ATCC MYA-4617 / FGSC 8958) GN=UBA4 PE=3 SV=1	molybdenum cofactor biosynthetic protein (CnxF), putative	18165575	GO:0001403//invasive growth in response to glucose limitation;GO:0018117//protein adenylylation;GO:0032447//protein urmylation;GO:0002143//tRNA wobble position uridine thiolation;GO:0034599//cellular response to oxidative stress;GO:0007114//cell budding;GO:2000220//regulation of pseudohyphal growth;GO:0018192//obsolete enzyme active site formation via cysteine modification to L-cysteine persulfid…	GO:0005634//nucleus;GO:0005829//cytosol;	GO:0004792//thiosulfate sulfurtransferase activity;GO:0070733//protein adenylyltransferase activity;GO:0042292//URM1 activating enzyme activity;GO:0005524//ATP binding;	ko04122(Sulfur relay system)
CCM_09483	134.124	308.064	1.19966	0.000123064	0.00580635	NW_006271977.1	GO:0030246;GO:0016021	-	sorNOG04918;sordNOG09312	O	-	Ricin B lectin	18171485	-	GO:0016021//integral component of membrane;	GO:0030246//carbohydrate binding;	-
CCM_00300	75.814	233.667	1.62392	0.000135005	0.00627741	NW_006271969.1	GO:0070290;GO:0008270	K13985	sordNOG04126	R	sp|Q8BH82|NAPEP_MOUSE N-acyl-phosphatidylethanolamine-hydrolyzing phospholipase D OS=Mus musculus GN=Napepld PE=1 SV=1	Zn-dependent hydrolase/oxidoreductase family protein, putative	18162335	-	-	GO:0070290//N-acylphosphatidylethanolamine-specific phospholipase D activity;GO:0008270//zinc ion binding;	ko04723(Retrograde endocannabinoid signaling)
CCM_01087	1362.3	4234.27	1.63607	0.000136267	0.00630563	NW_006271969.1	GO:0016021	-	sordNOG04436;opiNOG23709	S	-	hypothetical protein	18163120	-	GO:0016021//integral component of membrane;	-	-
CCM_06600	42.4151	133.659	1.65591	0.000140619	0.00644503	NW_006271973.1	-	-	opiNOG40598	R	-	hypothetical protein	18168614	-	-	-	-
CCM_05521	59.6545	152.086	1.35019	0.00014293	0.00651991	NW_006271972.1	GO:0016021;GO:0055114;GO:0016491;GO:0006633;GO:0005506	K22282	opiNOG11541;sorNOG04664	I	sp|Q9GKT2|FXDC2_MACFA Fatty acid hydroxylase domain-containing protein 2 OS=Macaca fascicularis GN=FAXDC2 PE=2 SV=1	sterol desaturase	18167539	GO:0055114//obsolete oxidation-reduction process;GO:0006633//fatty acid biosynthetic process;	GO:0016021//integral component of membrane;	GO:0016491//oxidoreductase activity;GO:0005506//iron ion binding;	-
CCM_08487	1737.48	3485.91	1.00454	0.000149115	0.00671642	NW_006271975.1	-	-	opiNOG17559;sordNOG10387	S	-	hypothetical protein	18170494	-	-	-	-
CCM_01506	330.918	693.184	1.06676	0.000149996	0.00671642	NW_006271969.1	GO:0009228;GO:0016310;GO:0004417;GO:0004789	K14154	sordNOG10698	H	sp|P40386|THI6_SCHPO Probable thiamine biosynthetic bifunctional enzyme OS=Schizosaccharomyces pombe (strain 972 / ATCC 24843) GN=thi4 PE=2 SV=1	thiamine-phosphate pyrophosphorylase	18163537	GO:0009228//thiamine biosynthetic process;GO:0016310//phosphorylation;	-	GO:0004417//hydroxyethylthiazole kinase activity;GO:0004789//thiamine-phosphate diphosphorylase activity;	ko00730(Thiamine metabolism)
CCM_04444	176.445	384.578	1.12406	0.000154481	0.00688371	NW_006271971.1	GO:0008080	-	onyNOG05071;sordNOG14631;sorNOG03550	R	-	Acyl-CoA N-acyltransferase	18166467	-	-	GO:0008080//N-acetyltransferase activity;	-
CCM_06413	224.485	628.313	1.48487	0.000156984	0.006963	NW_006271973.1	GO:0051082;GO:0005743;GO:0009060;GO:0016021;GO:0033617	K14998	opiNOG07475;sordNOG06705	C	sp|Q9Y810|SHY1_SCHPO Cytochrome oxidase assembly protein shy1 OS=Schizosaccharomyces pombe (strain 972 / ATCC 24843) GN=shy1 PE=3 SV=1	COX1 assembly protein Shy1, putative	18168427	GO:0009060//aerobic respiration;GO:0033617//mitochondrial cytochrome c oxidase assembly;	GO:0005743//mitochondrial inner membrane;GO:0016021//integral component of membrane;	GO:0051082//unfolded protein binding;	-
CCM_07265	110.657	255.296	1.20608	0.000166462	0.00733372	NW_006271973.1	GO:0005739;GO:0006461	K07555	opiNOG05279;sordNOG09638	O	sp|P32453|ATP11_YEAST Protein ATP11, mitochondrial OS=Saccharomyces cerevisiae (strain ATCC 204508 / S288c) GN=ATP11 PE=1 SV=1	F1F0 ATP synthase assembly protein Atp11, putative	18169276	-	GO:0005739//mitochondrion;	-	-
CCM_07117	64.0977	158.723	1.30817	0.000166948	0.00733372	NW_006271973.1	-	-	sorNOG01209;opiNOG05078	SR	-	hypothetical protein	18169128	-	-	-	-
CCM_08861	2859.81	9982.26	1.80344	0.000167628	0.00733372	NW_006271975.1	GO:0003824;GO:0008152	-	opiNOG09264	I	-	NRPS-like enzyme, putative	18170866	GO:0008152//metabolic process;	-	GO:0003824//catalytic activity;	-
CCM_00214	1307.59	2638.48	1.0128	0.000174937	0.00761887	NW_006271969.1	-	-	sordNOG12727	M	-	hypothetical protein	18162249	-	-	-	-
CCM_03240	63.0881	156.037	1.30645	0.000181396	0.00780382	NW_006271970.1	GO:0000404;GO:0005634;GO:1990043;GO:1990731;GO:0006290;GO:0005739;GO:0043504;GO:0006298;GO:0006289	K13281	sorNOG02817;sordNOG07810;opiNOG13919	LR	sp|Q01408|UVE1_NEUCR UV-damage endonuclease OS=Neurospora crassa (strain ATCC 24698 / 74-OR23-1A / CBS 708.71 / DSM 1257 / FGSC 987) GN=mus-18 PE=2 SV=2	UV-damage endonuclease	18165266	GO:1990731//UV-damage excision repair, DNA incision;GO:0006290//pyrimidine dimer repair;GO:0043504//mitochondrial DNA repair;GO:0006298//mismatch repair;GO:0006289//nucleotide-excision repair;	GO:0005634//nucleus;GO:0005739//mitochondrion;	GO:0000404//heteroduplex DNA loop binding;GO:1990043//5' deoxyribonuclease (pyrimidine dimer) activity;	-
CCM_00808	277.096	583.145	1.07347	0.000181616	0.00780382	NW_006271969.1	GO:0005743	-	opiNOG45477;sordNOG13804	S	-	hypothetical protein	18162842	-	GO:0005743//mitochondrial inner membrane;	-	-
CCM_01430	885.07	1778.25	1.00659	0.000185667	0.00794242	NW_006271969.1	GO:0050662;GO:0003824	-	opiNOG03439;sordNOG05428	R	sp|O74482|YQJ9_SCHPO Uncharacterized protein C1840.09 OS=Schizosaccharomyces pombe (strain 972 / ATCC 24843) GN=SPCC1840.09 PE=3 SV=1	NAD dependent epimerase/dehydratase family protein	18163461	-	-	GO:0050662//obsolete coenzyme binding;GO:0003824//catalytic activity;	-
CCM_07555	43.9735	117.309	1.4156	0.000195761	0.00822797	NW_006271974.1	-	-	opiNOG33821;sordNOG13667	S	-	hypothetical protein	18169566	-	-	-	-
CCM_05310	20.8193	81.5469	1.96971	0.000196845	0.00823754	NW_006271972.1	GO:0008199;GO:0055114;GO:0006725;GO:0016702	-	sordNOG05693;sordNOG10081;sorNOG00418	R	-	extracellular dioxygenase, putative	18167328	GO:0055114//obsolete oxidation-reduction process;GO:0006725//cellular aromatic compound metabolic process;	-	GO:0008199//ferric iron binding;GO:0016702//oxidoreductase activity, acting on single donors with incorporation of molecular oxygen, incorporation of two atoms of oxygen;	-
CCM_08897	357.773	776.533	1.118	0.000221846	0.00910932	NW_006271975.1	GO:0003735;GO:0006412;GO:0005762	K02906	opiNOG06712;sordNOG04697	J	sp|Q5LLU6|RL3_RUEPO 50S ribosomal protein L3 OS=Ruegeria pomeroyi (strain ATCC 700808 / DSM 15171 / DSS-3) GN=rplC PE=3 SV=1	60S ribosomal protein L3	18170902	GO:0006412//translation;	GO:0005762//mitochondrial large ribosomal subunit;	GO:0003735//structural constituent of ribosome;	ko03010(Ribosome)
CCM_03225	86.0008	226.922	1.39977	0.000222409	0.00910932	NW_006271970.1	-	-	opiNOG20426;sordNOG08573	S	-	hypothetical protein	18165251	-	-	-	-
CCM_05219	65.5398	161.012	1.29672	0.00022867	0.00928669	NW_006271972.1	GO:0004514;GO:0009435	K00767	opiNOG00922;sordNOG08064	F	sp|P43619|NADC_YEAST Nicotinate-nucleotide pyrophosphorylase [carboxylating] OS=Saccharomyces cerevisiae (strain ATCC 204508 / S288c) GN=BNA6 PE=1 SV=1	nicotinate-nucleotide pyrophosphorylase	18167238	GO:0009435//NAD biosynthetic process;	-	GO:0004514//nicotinate-nucleotide diphosphorylase (carboxylating) activity;	ko00760(Nicotinate and nicotinamide metabolism)
CCM_04545	1119.28	2360.99	1.07682	0.000230949	0.00931807	NW_006271971.1	-	-	opiNOG04049;sordNOG11479	S	-	integral membrane protein	18166568	-	-	-	-
CCM_03055	4.88234	31.0277	2.66791	0.000241022	0.00966597	NW_006271970.1	GO:0030170;GO:0006520;GO:0016765	K17069	opiNOG00778;sorNOG02598;opiNOG52000;COG2873	E	sp|P50125|CYSD_EMENI Homocysteine synthase OS=Emericella nidulans (strain FGSC A4 / ATCC 38163 / CBS 112.46 / NRRL 194 / M139) GN=cysD PE=1 SV=2	O-acetylhomoserine/O-acetylserine sulfhydrylase	18165082	GO:0006520//cellular amino acid metabolic process;	-	GO:0030170//pyridoxal phosphate binding;GO:0016765//transferase activity, transferring alkyl or aryl (other than methyl) groups;	ko00920(Sulfur metabolism);ko00270(Cysteine and methionine metabolism)
CCM_07247	70.3443	168.032	1.25623	0.00024858	0.00992771	NW_006271973.1	GO:0006810;GO:0016021	K15111	sordNOG04853	C	sp|Q5U680|SAMC_MOUSE S-adenosylmethionine mitochondrial carrier protein OS=Mus musculus GN=Slc25a26 PE=1 SV=2	mitochondrial carrier protein, putative	18169258	GO:0006810//transport;	GO:0016021//integral component of membrane;	-	-
CCM_03842	106.655	238.444	1.1607	0.000249706	0.00993151	NW_006271971.1	GO:0016853;GO:0008152	K05607	sordNOG11849	I	sp|F4JML5|ECH2M_ARATH Probable enoyl-CoA hydratase 2, mitochondrial OS=Arabidopsis thaliana GN=At4g16800 PE=2 SV=1	methylglutaconyl-CoA hydratase, putative	18165865	GO:0008152//metabolic process;	-	GO:0016853//isomerase activity;	ko00280(Valine, leucine and isoleucine degradation)
CCM_04005	0.979064	16.1161	4.04096	0.000250913	0.00993844	NW_006271971.1	-	-	-	-	-	hypothetical protein	18166028	-	-	-	-
CCM_02524	348.161	715.926	1.04005	0.000256019	0.0100584	NW_006271970.1	GO:0006412;GO:0005840;GO:0003735	K02899	opiNOG31089;sordNOG12482	J	sp|Q9HDV5|RM02_SCHPO 54S ribosomal protein L27, mitochondrial OS=Schizosaccharomyces pombe (strain 972 / ATCC 24843) GN=mrp7 PE=3 SV=1	50S ribosomal protein L27	18164551	GO:0006412//translation;	GO:0005840//ribosome;	GO:0003735//structural constituent of ribosome;	ko03010(Ribosome)
CCM_03595	1239.93	3268.34	1.3983	0.000258973	0.0101326	NW_006271970.1	GO:0015179;GO:0015807;GO:0005887;GO:0015297;GO:0003333	-	opiNOG01812;COG0531	E	sp|Q9ZU50|BAT1_ARATH Amino-acid permease BAT1 OS=Arabidopsis thaliana GN=BAT1 PE=2 SV=2	amino acid/polyamine transporter I	18165621	GO:0015807//L-amino acid transport;GO:0003333//amino acid transmembrane transport;	GO:0005887//integral component of plasma membrane;	GO:0015179//L-amino acid transmembrane transporter activity;GO:0015297//antiporter activity;	-
CCM_08174	381.656	777.714	1.02697	0.000263642	0.0102087	NW_006271974.1	-	K12178	sordNOG11466	OT	sp|Q7S0P8|CSN4_NEUCR COP9 signalosome complex subunit 4 OS=Neurospora crassa (strain ATCC 24698 / 74-OR23-1A / CBS 708.71 / DSM 1257 / FGSC 987) GN=csn-4 PE=1 SV=1	COP9 signalosome subunit CsnD	18170183	-	-	-	-
CCM_02011	67.7195	162.464	1.26248	0.000264101	0.0102087	NW_006271970.1	-	-	opiNOG06036;NOG37457	R	-	von Willebrand domain protein	18164040	-	-	-	-
CCM_00550	0.654206	14.7233	4.49222	0.000265497	0.0102216	NW_006271969.1	-	-	-	-	-	hypothetical protein	18162585	-	-	-	-
CCM_04482	33.1404	144.282	2.12223	0.000268398	0.0102754	NW_006271971.1	-	-	hypNOG12288;opiNOG36377;sordNOG13187	S	-	hypothetical protein	18166505	-	-	-	-
CCM_04817	38.413	104.613	1.44539	0.000269029	0.0102754	NW_006271971.1	GO:0005975;GO:0004568;GO:0008061;GO:0006032	K01183	COG3325;opiNOG23523;sordNOG10226	G	sp|P09805|KTXA_KLULA Killer toxin subunits alpha/beta OS=Kluyveromyces lactis (strain ATCC 8585 / CBS 2359 / DSM 70799 / NBRC 1267 / NRRL Y-1140 / WM37) PE=1 SV=1	class V chitinase Chi100	18166838	GO:0005975//carbohydrate metabolic process;GO:0006032//chitin catabolic process;	-	GO:0004568//chitinase activity;GO:0008061//chitin binding;	ko00520(Amino sugar and nucleotide sugar metabolism)
CCM_07470	57.6938	141.584	1.29517	0.000281757	0.0106394	NW_006271974.1	GO:0050790;GO:0097027;GO:0010997	K12782	opiNOG05585;sordNOG04266;opiNOG55476;sordNOG15470	DO	sp|P50082|AMA1_YEAST Meiosis-specific APC/C activator protein AMA1 OS=Saccharomyces cerevisiae (strain ATCC 204508 / S288c) GN=AMA1 PE=1 SV=2	meiosis-specific APC/C activator protein AMA1	18169481	GO:0050790//regulation of catalytic activity;	-	GO:0097027//ubiquitin-protein transferase activator activity;GO:0010997//anaphase-promoting complex binding;	ko04113(Meiosis - yeast)
CCM_05892	2775.52	40199.1	3.85633	0.000281874	0.0106394	NW_006271972.1	GO:0005524	K03695	sordNOG05401	O	sp|O74402|HSP78_SCHPO Heat shock protein 78, mitochondrial OS=Schizosaccharomyces pombe (strain 972 / ATCC 24843) GN=hsp78 PE=3 SV=1	heat shock protein 78	18167910	-	-	GO:0005524//ATP binding;	ko04213(Longevity regulating pathway - multiple species)
CCM_05328	39.7748	106.529	1.42131	0.000283529	0.01066	NW_006271972.1	GO:0055114;GO:0016491	-	sordNOG05370	R	sp|Q9LES4|L2HDH_ARATH L-2-hydroxyglutarate dehydrogenase, mitochondrial OS=Arabidopsis thaliana GN=L2HGDH PE=1 SV=1	L-2-hydroxyglutarate dehydrogenase	18167346	GO:0055114//obsolete oxidation-reduction process;	-	GO:0016491//oxidoreductase activity;	-
CCM_04120	100.991	226.449	1.16496	0.000308167	0.0114965	NW_006271971.1	GO:0004222;GO:0006508;GO:0005576;GO:0046872	K19305	opiNOG57541	O	sp|E3QWD3|NPIIA_COLGM Neutral protease 2 homolog MGG_10927 OS=Colletotrichum graminicola (strain M1.001 / M2 / FGSC 10212) GN=GLRG_10315 PE=3 SV=1	deuterolysin metalloprotease (M35) family protein	18166143	GO:0006508//proteolysis;	GO:0005576//extracellular region;	GO:0004222//metalloendopeptidase activity;GO:0046872//metal ion binding;	-
CCM_00442	1121.08	9088.48	3.01915	0.000312476	0.011609	NW_006271969.1	GO:0005829;GO:0006020;GO:0005635;GO:0016021	K23327	opiNOG39021;sordNOG12402	S	sp|O60175|OPI10_SCHPO Protein OPI10 homolog OS=Schizosaccharomyces pombe (strain 972 / ATCC 24843) GN=SPBC21H7.06c PE=3 SV=1	DUF775 domain protein	18162477	GO:0006020//inositol metabolic process;	GO:0005829//cytosol;GO:0005635//nuclear envelope;GO:0016021//integral component of membrane;	-	-
CCM_05652	2389.98	13095.6	2.45401	0.000313593	0.011609	NW_006271972.1	-	-	-	-	-	hypothetical protein	18167670	-	-	-	-
CCM_01607	311.485	628.954	1.01379	0.00032058	0.0116878	NW_006271969.1	GO:0050661;GO:0055114;GO:0008677	K00077	sordNOG08893;hypNOG07114;COG1893	H	sp|S0EGG0|BEA2_GIBF5 Ketoisovalerate reductase BEA2 OS=Gibberella fujikuroi (strain CBS 195.34 / IMI 58289 / NRRL A-6831) GN=BEA2 PE=2 SV=1	2-dehydropantoate 2-reductase	18163637	GO:0055114//obsolete oxidation-reduction process;	-	GO:0050661//NADP binding;GO:0008677//2-dehydropantoate 2-reductase activity;	ko00770(Pantothenate and CoA biosynthesis)
CCM_08141	2.62131	23.735	3.17865	0.000328782	0.0119416	NW_006271974.1	-	-	-	-	-	hypothetical protein	18170150	-	-	-	-
CCM_09482	9.46078	40.042	2.08148	0.000337158	0.0121103	NW_006271977.1	-	-	sordNOG14906;necNOG13052	S	-	GLEYA adhesin domain	18171484	-	-	-	-
CCM_01456	140.619	1008.47	2.8423	0.000355549	0.0125815	NW_006271969.1	GO:0005759;GO:0016740;GO:0016226	K22073	sordNOG06906;opiNOG06342	KE	sp|A4R8F9|CAF17_MAGO7 Putative transferase CAF17, mitochondrial OS=Magnaporthe oryzae (strain 70-15 / ATCC MYA-4617 / FGSC 8958) GN=CAF17 PE=3 SV=1	aminomethyl transferase	18163487	GO:0016226//iron-sulfur cluster assembly;	GO:0005759//mitochondrial matrix;	GO:0016740//transferase activity;	-
CCM_05909	692.905	2228.25	1.68518	0.000377686	0.0131236	NW_006271972.1	GO:0016485;GO:0009898;GO:0007126;GO:0001403	K20063	necNOG07163;opiNOG02229;sordNOG15551	R	sp|Q7SGZ5|PALF_NEUCR pH-response regulator protein palF/prr-3 OS=Neurospora crassa (strain ATCC 24698 / 74-OR23-1A / CBS 708.71 / DSM 1257 / FGSC 987) GN=prr-3 PE=3 SV=2	pH response protein PalF	18167927	GO:0016485//protein processing;GO:0001403//invasive growth in response to glucose limitation;	GO:0009898//cytoplasmic side of plasma membrane;	-	-
CCM_08769	431.397	885.322	1.03718	0.000383225	0.0132616	NW_006271975.1	GO:0005737;GO:0008138;GO:0035335;GO:0004725;GO:0030476	-	sordNOG08391	V	sp|P60483|PTEN_CANLF Phosphatidylinositol 3,4,5-trisphosphate 3-phosphatase and dual-specificity protein phosphatase PTEN OS=Canis lupus familiaris GN=PTEN PE=2 SV=1	phosphatidylinositol-3,4,5-trisphosphate 3-phosphatase PTEN	18170774	GO:0035335//peptidyl-tyrosine dephosphorylation;GO:0030476//ascospore wall assembly;	GO:0005737//cytoplasm;	GO:0008138//protein tyrosine/serine/threonine phosphatase activity;GO:0004725//protein tyrosine phosphatase activity;	-
CCM_00947	2574.29	6547.01	1.34666	0.000384414	0.0132616	NW_006271969.1	-	-	opiNOG14310;COG2335;necNOG11914;sordNOG04736	MSWR	sp|D4B388|FLA_ARTBC Fasciclin-like arabinogalactan protein ARB_02922 OS=Arthroderma benhamiae (strain ATCC MYA-4681 / CBS 112371) GN=ARB_02922 PE=3 SV=1	beta-Ig-H3/Fasciclin	18162980	-	-	-	-
CCM_05897	181.778	385.929	1.08616	0.000387309	0.0133137	NW_006271972.1	GO:0005743;GO:0051082;GO:0033615;GO:0032592	K18192	sordNOG08443;opiNOG11335	O	sp|Q757F3|ATP10_ASHGO Mitochondrial ATPase complex subunit ATP10 OS=Ashbya gossypii (strain ATCC 10895 / CBS 109.51 / FGSC 9923 / NRRL Y-1056) GN=ATP10 PE=3 SV=2	F1F0 ATP synthase assembly protein Atp10, putative	18167915	GO:0033615//mitochondrial proton-transporting ATP synthase complex assembly;	GO:0005743//mitochondrial inner membrane;GO:0032592//integral component of mitochondrial membrane;	GO:0051082//unfolded protein binding;	-
CCM_01386	66.4834	182.472	1.45661	0.000426723	0.0146164	NW_006271969.1	GO:0016740	K01796	sordNOG08083;opiNOG07122	I	sp|Q8J0F0|CEFD2_ACRCH Isopenicillin N epimerase component 2 OS=Acremonium chrysogenum GN=cefD2 PE=3 SV=1	alpha-methylacyl-CoA racemase	18163417	-	-	GO:0016740//transferase activity;	ko04146(Peroxisome);ko00120(Primary bile acid biosynthesis)
CCM_00281	317.493	635.98	1.00226	0.000447723	0.0151462	NW_006271969.1	GO:0016491;GO:0055114	-	sordNOG08158;opiNOG20327	R	sp|Q9Z3S3|ORDL_RHIME Probable oxidoreductase OrdL OS=Rhizobium meliloti (strain 1021) GN=ordL PE=4 SV=2	FAD dependent oxidoreductase	18162316	GO:0055114//obsolete oxidation-reduction process;	-	GO:0016491//oxidoreductase activity;	-
CCM_00632	1997.63	4094.97	1.03557	0.000471863	0.015661	NW_006271969.1	GO:0016021	K17278	opiNOG29938;sordNOG12306;sorNOG06768	R	sp|Q12091|DAP1_YEAST Damage response protein 1 OS=Saccharomyces cerevisiae (strain ATCC 204508 / S288c) GN=DAP1 PE=1 SV=1	membrane-associated progesterone receptor component 1	18162667	-	GO:0016021//integral component of membrane;	-	-
CCM_01493	316.933	1312.09	2.04962	0.000488663	0.01611	NW_006271969.1	GO:0016021	K14347	sordNOG09929;opiNOG07485	SP	sp|Q05131|YMS4_YEAST Uncharacterized membrane protein YMR034C OS=Saccharomyces cerevisiae (strain ATCC 204508 / S288c) GN=YMR034C PE=1 SV=1	sodium bile acid symporter	18163524	-	GO:0016021//integral component of membrane;	-	-
CCM_00800	118.382	264.595	1.16034	0.00050344	0.0165379	NW_006271969.1	GO:0016021	-	opiNOG03121;sordNOG10797	E	sp|P38680|MTR_NEUCR N amino acid transport system protein OS=Neurospora crassa (strain ATCC 24698 / 74-OR23-1A / CBS 708.71 / DSM 1257 / FGSC 987) GN=mtr PE=3 SV=2	amino acid transporter, putative	18162834	-	GO:0016021//integral component of membrane;	-	-
CCM_02455	515.08	1244.69	1.27292	0.00050798	0.0165999	NW_006271970.1	GO:0016021	-	sordNOG13150;opiNOG39327;opiNOG46359	S	-	hypothetical protein	18164482	-	GO:0016021//integral component of membrane;	-	-
CCM_02210	56.1798	179.583	1.67653	0.000508776	0.0165999	NW_006271970.1	-	-	fuNOG00029;opiNOG18275;sorNOG02482;sordNOG04435	ROG	sp|D4AUF1|WSCD1_ARTBC WSC domain-containing protein ARB_07867 OS=Arthroderma benhamiae (strain ATCC MYA-4681 / CBS 112371) GN=ARB_07867 PE=1 SV=1	copper radical oxidase	18164237	-	-	-	-
CCM_09633	70.3099	161.669	1.20125	0.000524858	0.0168955	NW_006271978.1	GO:0055114;GO:0008270;GO:0016491	-	opiNOG53302;COG0604	C	sp|Q5AUW6|ORSE_EMENI Dehydrogenase orsE OS=Emericella nidulans (strain FGSC A4 / ATCC 38163 / CBS 112.46 / NRRL 194 / M139) GN=orsE PE=2 SV=1	alcohol dehydrogenase, putative	18171635	GO:0055114//obsolete oxidation-reduction process;	-	GO:0008270//zinc ion binding;GO:0016491//oxidoreductase activity;	-
CCM_04509	51.5435	142.338	1.46546	0.00053034	0.0169585	NW_006271971.1	-	-	-	-	-	hypothetical protein	18166532	-	-	-	-
CCM_07209	410.995	894.348	1.12172	0.000543373	0.0173178	NW_006271973.1	-	-	NOG15125	S	sp|O34780|YOBF_BACSU Uncharacterized protein YobF OS=Bacillus subtilis (strain 168) GN=yobF PE=4 SV=1	RADC family protein	18169220	-	-	-	-
CCM_09393	237.006	475.037	1.00312	0.000557904	0.0174913	NW_006271977.1	-	-	necNOG12117;opiNOG34973	S	-	Heterokaryon incompatibility	18171396	-	-	-	-
CCM_09144	1001.44	3637.69	1.86095	0.000561626	0.0175508	NW_006271976.1	-	-	opiNOG23509;opiNOG60613;hypNOG06650	S	sp|Q0CCX5|GEDK_ASPTN Questin oxidase OS=Aspergillus terreus (strain NIH 2624 / FGSC A1156) GN=gedK PE=1 SV=1	HypA-like protein, putative	18171147	-	-	-	-
CCM_09390	2881.06	5816.85	1.01364	0.000568138	0.0176969	NW_006271977.1	GO:0055085;GO:0005524;GO:0016021;GO:0042626	K05665	opiNOG11164	Q	sp|Q8J2Q1|FUM19_GIBM7 ABC transporter FUM19 OS=Gibberella moniliformis (strain M3125 / FGSC 7600) GN=FUM19 PE=2 SV=1	ABC multidrug transporter, putative	18171393	GO:0055085//transmembrane transport;	GO:0016021//integral component of membrane;	GO:0005524//ATP binding;GO:0042626//ATPase-coupled transmembrane transporter activity;	ko05206(MicroRNAs in cancer);ko04977(Vitamin digestion and absorption);ko04071(Sphingolipid signaling pathway);ko02010(ABC transporters);ko01523(Antifolate resistance)
CCM_01348	133.46	280.78	1.07303	0.000592127	0.0181135	NW_006271969.1	GO:0016021;GO:0055085	-	sordNOG07874;opiNOG03870	G	sp|Q9US44|YIZG_SCHPO Uncharacterized transporter C1002.16c OS=Schizosaccharomyces pombe (strain 972 / ATCC 24843) GN=SPAC1002.16c PE=3 SV=1	MFS transporter, putative	18163379	GO:0055085//transmembrane transport;	GO:0016021//integral component of membrane;	-	-
CCM_01650	68.1292	187.484	1.46043	0.000593871	0.0181135	NW_006271969.1	-	-	NOG121180	S	-	hypothetical protein	18163680	-	-	-	-
CCM_03479	106.903	228.564	1.09629	0.000604569	0.0181843	NW_006271970.1	-	-	eurotNOG09976;opiNOG41460;opiNOG61781	RS	-	hypothetical protein	18165505	-	-	-	-
CCM_07563	481.557	1126.04	1.22547	0.000614202	0.0183593	NW_006271974.1	GO:0006351;GO:0008270;GO:0003677;GO:0005634	-	opiNOG02118	S	-	fungal specific transcription factor	18169574	GO:0006351//transcription, DNA-templated;	GO:0005634//nucleus;	GO:0008270//zinc ion binding;GO:0003677//DNA binding;	-
CCM_08500	25.3373	134.37	2.40688	0.000627371	0.0186372	NW_006271975.1	-	-	opiNOG44641;necNOG12242;hypNOG03213;sordNOG14015	R	-	hypothetical protein	18170507	-	-	-	-
CCM_08889	1825.36	5335.64	1.54748	0.00063745	0.0188204	NW_006271975.1	GO:0016874;GO:0008152	K01897	sordNOG06511;opiNOG02846	I	sp|Q8LKS5|LACS7_ARATH Long chain acyl-CoA synthetase 7, peroxisomal OS=Arabidopsis thaliana GN=LACS7 PE=1 SV=2	long-chain-fatty-acid-CoA ligase 1	18170894	GO:0008152//metabolic process;	-	GO:0016874//ligase activity;	ko04920(Adipocytokine signaling pathway);ko04714(Thermogenesis);ko04216(Ferroptosis);ko04146(Peroxisome);ko03320(PPAR signaling pathway);ko02024(Quorum sensing);ko00071(Fatty acid degradation);ko00061(Fatty acid biosynthesis)
CCM_00275	326.133	914.381	1.48733	0.000661631	0.0194153	NW_006271969.1	GO:0005789;GO:0051377;GO:0016021;GO:0006506	K05287	sordNOG12671	G	sp|Q4HXT5|GPI11_GIBZE Glycosylphosphatidylinositol anchor biosynthesis protein 11 OS=Gibberella zeae (strain PH-1 / ATCC MYA-4620 / FGSC 9075 / NRRL 31084) GN=GPI11 PE=3 SV=1	GPI-anchor biosynthesis protein, putative	18162310	GO:0006506//GPI anchor biosynthetic process;	GO:0005789//endoplasmic reticulum membrane;GO:0016021//integral component of membrane;	GO:0051377//mannose-ethanolamine phosphotransferase activity;	ko00563(Glycosylphosphatidylinositol (GPI)-anchor biosynthesis)
CCM_03983	10.4139	40.465	1.95816	0.000674686	0.0195815	NW_006271971.1	-	-	-	-	-	hypothetical protein	18166006	-	-	-	-
CCM_02519	29.9892	80.487	1.42431	0.000676063	0.0195815	NW_006271970.1	GO:0071949;GO:0055114;GO:0004497	-	opiNOG31887	CH	sp|Q3S8Q4|OXYL_STRRM 6-methylpretetramide 4-monooxygenase OS=Streptomyces rimosus GN=oxyL PE=1 SV=1	PheA/TfdB family FAD-binding monooxygenase	18164546	GO:0055114//obsolete oxidation-reduction process;	-	GO:0071949//FAD binding;GO:0004497//monooxygenase activity;	-
CCM_01613	11.0621	45.7865	2.0493	0.000679503	0.0195815	NW_006271969.1	GO:0016740	-	sordNOG07716;opiNOG20784	S	sp|B8NM79|USTS_ASPFN Glutathione S-transferase-like protein ustS OS=Aspergillus flavus (strain ATCC 200026 / FGSC A1120 / NRRL 3357 / JCM 12722 / SRRC 167) GN=ustS PE=1 SV=2	Glutathione S-transferase	18163643	-	-	GO:0016740//transferase activity;	-
CCM_02986	3.56744	23.0123	2.68945	0.000698392	0.0200291	NW_006271970.1	-	-	opiNOG57061;sordNOG10397	S	-	hypothetical protein	18165013	-	-	-	-
CCM_06099	82.382	181.377	1.13859	0.000701268	0.0200291	NW_006271972.1	GO:0055085;GO:0016021	-	opiNOG01609;pleNOG07115	G	sp|P40445|YIQ6_YEAST Uncharacterized transporter YIL166C OS=Saccharomyces cerevisiae (strain ATCC 204508 / S288c) GN=YIL166C PE=1 SV=1	phthalate transporter	18168114	GO:0055085//transmembrane transport;	GO:0016021//integral component of membrane;	-	-
CCM_00130	68.3887	221.651	1.69646	0.000702022	0.0200291	NW_006271969.1	-	-	sordNOG14826;hypNOG11306	S	-	hypothetical protein	18162165	-	-	-	-
CCM_06556	50.7411	120.888	1.25244	0.000707056	0.0200291	NW_006271973.1	GO:0004190;GO:0006508	-	sordNOG05838;sorNOG04474;opiNOG01174	O	sp|P11838|CARP_CRYPA Endothiapepsin OS=Cryphonectria parasitica GN=EAPA PE=1 SV=2	endothiapepsin precursor	18168570	GO:0006508//proteolysis;	-	GO:0004190//aspartic-type endopeptidase activity;	-
CCM_02665	967.195	2916	1.59211	0.000712221	0.0200291	NW_006271970.1	GO:0050660;GO:0055114;GO:0016614	-	sordNOG05349	R	sp|B5WWZ9|FAO2_LOTJA Long-chain-alcohol oxidase FAO2 OS=Lotus japonicus GN=FAO2 PE=2 SV=1	long chain fatty alcohol oxidase	18164692	GO:0055114//obsolete oxidation-reduction process;	-	GO:0050660//flavin adenine dinucleotide binding;GO:0016614//oxidoreductase activity, acting on CH-OH group of donors;	-
CCM_07447	985.385	3745.1	1.92625	0.000717803	0.0200291	NW_006271974.1	GO:0016310;GO:0004140;GO:0005524;GO:0016021;GO:0015937	K00859	opiNOG19547;sordNOG07465	H	sp|Q03941|CAB5_YEAST Dephospho-CoA kinase CAB5 OS=Saccharomyces cerevisiae (strain ATCC 204508 / S288c) GN=CAB5 PE=1 SV=1	dephospho-CoA kinase, putative	18169458	GO:0016310//phosphorylation;GO:0015937//coenzyme A biosynthetic process;	GO:0016021//integral component of membrane;	GO:0004140//dephospho-CoA kinase activity;GO:0005524//ATP binding;	ko00770(Pantothenate and CoA biosynthesis)
CCM_01492	23044	68748	1.57693	0.000721833	0.0200291	NW_006271969.1	-	-	opiNOG39069;sorNOG05872;sordNOG13034	R	sp|D4B0F8|TLP1_ARTBC Antigenic thaumatin-like protein ARB_01932 OS=Arthroderma benhamiae (strain ATCC MYA-4681 / CBS 112371) GN=ARB_01932 PE=1 SV=2	BYS1 domain-containing protein	18163523	-	-	-	-
CCM_09150	1137.07	3695.12	1.7003	0.000722007	0.0200291	NW_006271976.1	GO:0008168;GO:0032259	-	sordNOG07342	S	-	hypothetical protein	18171153	GO:0032259//methylation;	-	GO:0008168//methyltransferase activity;	-
CCM_02008	2395.61	13051.2	2.44572	0.000722089	0.0200291	NW_006271970.1	GO:0016705;GO:0020037;GO:0005506;GO:0016021;GO:0004497;GO:0055114	-	sordNOG10103;opiNOG21609;opiNOG24895	Q	sp|G3XMC3|AZAI_ASPNA Cytochrome P450 monooxygenase azaI OS=Aspergillus niger (strain ATCC 1015 / CBS 113.46 / FGSC A1144 / LSHB Ac4 / NCTC 3858a / NRRL 328 / USDA 3528.7) GN=azaI PE=2 SV=1	Cytochrome P450	18164037	GO:0055114//obsolete oxidation-reduction process;	GO:0016021//integral component of membrane;	GO:0016705//oxidoreductase activity, acting on paired donors, with incorporation or reduction of molecular oxygen;GO:0020037//heme binding;GO:0005506//iron ion binding;GO:0004497//monooxygenase activity;	-
CCM_09494	97.7057	254.107	1.37892	0.000728858	0.0201588	NW_006271977.1	GO:0016787	-	COG0596;sordNOG14194;opiNOG26091	R	sp|Q6NAM1|DEHA_RHOPA Fluoroacetate dehalogenase OS=Rhodopseudomonas palustris (strain ATCC BAA-98 / CGA009) GN=RPA1163 PE=1 SV=1	epoxide hydrolase, putative	18171496	-	-	GO:0016787//hydrolase activity;	-
CCM_08255	13.6919	46.5801	1.76639	0.00073477	0.0202641	NW_006271975.1	GO:0008270;GO:0016832;GO:0005975	K01624	sordNOG09386	G	sp|P0CJ44|ALF_COCIM Putative fructose-bisphosphate aldolase OS=Coccidioides immitis (strain RS) GN=CIMG_05755 PE=1 SV=1	Ketose-bisphosphate aldolase, class-II	18170263	GO:0005975//carbohydrate metabolic process;	-	GO:0008270//zinc ion binding;GO:0016832//aldehyde-lyase activity;	ko00710(Carbon fixation in photosynthetic organisms);ko00680(Methane metabolism);ko00051(Fructose and mannose metabolism);ko00030(Pentose phosphate pathway);ko00010(Glycolysis / Gluconeogenesis)
CCM_02530	167.237	340.259	1.02474	0.000741938	0.0202951	NW_006271970.1	GO:0055085;GO:0022857;GO:0016021	-	sordNOG07611;opiNOG03112	P	sp|A0A1D8PN12|GIT2_CANAL Glycerophosphodiester transporter GIT2 OS=Candida albicans (strain SC5314 / ATCC MYA-2876) GN=GIT2 PE=2 SV=1	MFS phospholipid transporter Git1	18164557	GO:0055085//transmembrane transport;	GO:0016021//integral component of membrane;	GO:0022857//transmembrane transporter activity;	-
CCM_07278	12.0636	54.8449	2.18469	0.000745121	0.0202951	NW_006271973.1	GO:0016301;GO:0016310;GO:0005524	-	sorNOG05364;opiNOG57264	S	-	zeta toxin family protein	18169289	GO:0016310//phosphorylation;	-	GO:0016301//kinase activity;GO:0005524//ATP binding;	-
CCM_04839	23.4771	66.704	1.50652	0.000746236	0.0202951	NW_006271971.1	GO:0065007	-	euNOG27048;sordNOG10574	TS	-	hypothetical protein	18166860	GO:0065007//biological regulation;	-	-	-
CCM_07579	195.588	391.4	1.00082	0.00081424	0.0217093	NW_006271974.1	GO:0016791;GO:0016311	K17619	sordNOG12633	R	sp|Q9D967|MGDP1_MOUSE Magnesium-dependent phosphatase 1 OS=Mus musculus GN=Mdp1 PE=1 SV=1	magnesium dependent phosphatase	18169590	GO:0016311//dephosphorylation;	-	GO:0016791//phosphatase activity;	-
CCM_02484	6689.41	29296.1	2.13076	0.000819016	0.0217763	NW_006271970.1	GO:0008270;GO:0016491;GO:0055114	K13953	sordNOG11412;opiNOG02528;pleNOG02562	Q	sp|Q9P6C8|ADH1_NEUCR Alcohol dehydrogenase 1 OS=Neurospora crassa (strain ATCC 24698 / 74-OR23-1A / CBS 708.71 / DSM 1257 / FGSC 987) GN=adh-1 PE=3 SV=1	alcohol dehydrogenase 1	18164511	GO:0055114//obsolete oxidation-reduction process;	-	GO:0008270//zinc ion binding;GO:0016491//oxidoreductase activity;	ko00982(Drug metabolism - cytochrome P450);ko00980(Metabolism of xenobiotics by cytochrome P450);ko00830(Retinol metabolism);ko00626(Naphthalene degradation);ko00625(Chloroalkane and chloroalkene degradation);ko00620(Pyruvate metabolism);ko00350(Tyrosine metabolism);ko00071(Fatty acid degradation);ko00010(Glycolysis / Gluconeogenesis)
CCM_06624	359.368	1112.13	1.62979	0.000859618	0.0226591	NW_006271973.1	GO:0005739;GO:0047631;GO:0019693;GO:0005634;GO:0005829	K01515	opiNOG16519;sordNOG07092	L	sp|Q01976|ADPP_YEAST ADP-ribose pyrophosphatase OS=Saccharomyces cerevisiae (strain ATCC 204508 / S288c) GN=YSA1 PE=1 SV=2	MutT/nudix family protein	18168638	GO:0019693//ribose phosphate metabolic process;	GO:0005739//mitochondrion;GO:0005634//nucleus;GO:0005829//cytosol;	GO:0047631//ADP-ribose diphosphatase activity;	ko00230(Purine metabolism)
CCM_08815	86.0208	186.757	1.11841	0.000861633	0.0226591	NW_006271975.1	GO:0016021	-	opiNOG24360	S	-	integral membrane protein	18170820	-	GO:0016021//integral component of membrane;	-	-
CCM_03018	492.872	1385.42	1.49104	0.000867433	0.0226964	NW_006271970.1	GO:0043022;GO:0019898;GO:0002181;GO:0005743;GO:0005525	K03979	sordNOG10968;opiNOG02676	R	sp|P38860|MTG2_YEAST GTPase MTG2, mitochondrial OS=Saccharomyces cerevisiae (strain ATCC 204508 / S288c) GN=MTG2 PE=1 SV=2	GTP-binding protein Obg	18165045	GO:0002181//cytoplasmic translation;	GO:0019898//extrinsic component of membrane;GO:0005743//mitochondrial inner membrane;	GO:0043022//ribosome binding;GO:0005525//GTP binding;	-
CCM_05073	53.4188	123.903	1.21379	0.000867769	0.0226964	NW_006271972.1	GO:0005975;GO:0016021;GO:0004557	-	sordNOG11386;COG3345;opiNOG23225	G	sp|Q9UUZ4|AGALC_ASPNG Alpha-galactosidase C OS=Aspergillus niger GN=aglC PE=1 SV=1	Glycoside hydrolase, clan GH-D	18167093	GO:0005975//carbohydrate metabolic process;	GO:0016021//integral component of membrane;	GO:0004557//alpha-galactosidase activity;	-
CCM_05326	7867.95	17629.5	1.16394	0.000882281	0.0228751	NW_006271972.1	GO:0006457;GO:0051082;GO:0005524	K04043	opiNOG00748;sorNOG00178;sordNOG04035	O	sp|Q5B0C0|HSP7M_EMENI Heat shock 70 kDa protein OS=Emericella nidulans (strain FGSC A4 / ATCC 38163 / CBS 112.46 / NRRL 194 / M139) GN=AN6010 PE=1 SV=1	heat shock 70 kDa protein	18167344	GO:0006457//protein folding;	-	GO:0051082//unfolded protein binding;GO:0005524//ATP binding;	ko05152(Tuberculosis);ko04212(Longevity regulating pathway - worm);ko03018(RNA degradation)
CCM_00989	1142.91	2706.94	1.24395	0.000912905	0.0232841	NW_006271969.1	-	-	-	-	-	hypothetical protein	18163022	-	-	-	-
CCM_05912	21.1971	61.9438	1.54709	0.000923552	0.0233926	NW_006271972.1	GO:0005524;GO:0004672;GO:0006468	-	opiNOG06843;sorNOG07898;opiNOG55342	TR	sp|P36616|DSK1_SCHPO Protein kinase dsk1 OS=Schizosaccharomyces pombe (strain 972 / ATCC 24843) GN=dsk1 PE=3 SV=2	Protein kinase-like domain	18167930	GO:0006468//protein phosphorylation;	-	GO:0005524//ATP binding;GO:0004672//protein kinase activity;	-
CCM_05706	84.4694	299.742	1.82722	0.000935207	0.0236256	NW_006271972.1	GO:0008080;GO:0016787	-	sordNOG13476	R	-	putative acetyltransferase	18167724	-	-	GO:0008080//N-acetyltransferase activity;GO:0016787//hydrolase activity;	-
CCM_07174	1946.03	4024.06	1.04811	0.000988571	0.0246331	NW_006271973.1	GO:0045041;GO:0005524;GO:0042026;GO:0005759;GO:0051131;GO:0051087;GO:0051082	K04078	opiNOG37297	O	sp|O59804|CH10_SCHPO 10 kDa heat shock protein, mitochondrial OS=Schizosaccharomyces pombe (strain 972 / ATCC 24843) GN=hsp10 PE=1 SV=1	chaperonin	18169185	GO:0045041//protein import into mitochondrial intermembrane space;GO:0042026//protein refolding;GO:0051131//chaperone-mediated protein complex assembly;	GO:0005759//mitochondrial matrix;	GO:0005524//ATP binding;GO:0051087//chaperone binding;GO:0051082//unfolded protein binding;	-
CCM_04906	38.7872	98.1931	1.34004	0.000990441	0.0246331	NW_006271971.1	GO:0016021	-	opiNOG57495;opiNOG02169	S	-	integral membrane protein	18166927	-	GO:0016021//integral component of membrane;	-	-
CCM_00229	1940.14	4129.97	1.08997	0.00102524	0.0252118	NW_006271969.1	-	-	-	-	-	hypothetical protein	18162264	-	-	-	-
CCM_05133	3243.6	15949	2.29779	0.00102943	0.0252118	NW_006271972.1	GO:0008270	K06874	sordNOG11303	R	sp|P53303|ZPR1_YEAST Zinc finger protein ZPR1 OS=Saccharomyces cerevisiae (strain ATCC 204508 / S288c) GN=ZPR1 PE=1 SV=1	zinc finger protein zpr1	18167153	-	-	GO:0008270//zinc ion binding;	-
CCM_08945	5214.67	16811.6	1.68881	0.00106219	0.0258825	NW_006271975.1	-	-	sorNOG06066;sordNOG14509;opiNOG60173;magNOG12838	R	-	hypothetical protein	18170949	-	-	-	-
CCM_01110	6361.44	16847	1.40506	0.00109318	0.0265034	NW_006271969.1	-	-	sordNOG10901;opiNOG15902;opiNOG76423	S	-	hypothetical protein	18163143	-	-	-	-
CCM_07620	3.91675	23.115	2.5611	0.00113722	0.0271607	NW_006271974.1	-	-	sorNOG07230;sordNOG12767;opiNOG25532	SR	-	nucleoside-diphosphate-sugar epimerase, putative	18169631	-	-	-	-
CCM_01075	216.737	1730.44	2.99713	0.00116058	0.0275137	NW_006271969.1	-	-	-	-	-	hypothetical protein	18163108	-	-	-	-
CCM_02734	3527.67	8964.18	1.34545	0.00116944	0.0276011	NW_006271970.1	GO:0046685;GO:0043224;GO:0046686;GO:0043130;GO:0000209;GO:0031146;GO:0030174;GO:0042802;GO:0000083	K10259	opiNOG02953;sordNOG12155	KR	sp|Q01277|SCONB_NEUCR Probable E3 ubiquitin ligase complex SCF subunit scon-2 OS=Neurospora crassa (strain ATCC 24698 / 74-OR23-1A / CBS 708.71 / DSM 1257 / FGSC 987) GN=scon-2 PE=1 SV=1	sulfur controller-2	18164761	GO:0046685//response to arsenic-containing substance;GO:0046686//response to cadmium ion;GO:0000209//protein polyubiquitination;GO:0031146//SCF-dependent proteasomal ubiquitin-dependent protein catabolic process;GO:0030174//regulation of DNA-dependent DNA replication initiation;GO:0000083//regulation of transcription involved in G1/S transition of mitotic cell cycle;	GO:0043224//nuclear SCF ubiquitin ligase complex;	GO:0043130//ubiquitin binding;GO:0042802//identical protein binding;	ko04120(Ubiquitin mediated proteolysis);ko04111(Cell cycle - yeast)
CCM_08515	1467.28	5495.03	1.90498	0.00117	0.0276011	NW_006271975.1	-	-	opiNOG17399	U	sp|P35200|UPS2_YEAST Protein UPS2, mitochondrial OS=Saccharomyces cerevisiae (strain ATCC 204508 / S288c) GN=UPS2 PE=1 SV=1	protein MSF1	18170522	-	-	-	-
CCM_06802	1866.09	7433.89	1.99409	0.0012101	0.0283237	NW_006271973.1	-	-	-	-	-	hypothetical protein	18168813	-	-	-	-
CCM_02316	160.069	435.7	1.44464	0.00125196	0.0290364	NW_006271970.1	GO:0042407;GO:0044284;GO:0061617	K17786	sordNOG06037;sordNOG08600	S	sp|P50087|MIC26_YEAST MICOS subunit MIC26 OS=Saccharomyces cerevisiae (strain ATCC 204508 / S288c) GN=MIC26 PE=1 SV=1	mitochondrial protein, putative	18164343	GO:0042407//cristae formation;	GO:0044284//mitochondrial crista junction;GO:0061617//MICOS complex;	-	-
CCM_09608	117.635	238.808	1.02153	0.00128841	0.0296674	NW_006271978.1	GO:0006508;GO:0008237;GO:0046872	-	COG0339;pleNOG01466	EO	-	hypothetical protein	18171610	GO:0006508//proteolysis;	-	GO:0008237//metallopeptidase activity;GO:0046872//metal ion binding;	-
CCM_08155	16.2798	59.8511	1.8783	0.00129193	0.0296775	NW_006271974.1	-	-	-	-	-	hypothetical protein	18170164	-	-	-	-
CCM_04800	0	8.6501	Inf	0.00131313	0.0299118	NW_006271971.1	-	-	-	-	-	hypothetical protein	18166821	-	-	-	-
CCM_03764	25.0804	67.7378	1.4334	0.00131767	0.0299118	NW_006271971.1	-	-	-	-	-	hypothetical protein	18165787	-	-	-	-
CCM_07194	155.673	462.194	1.56998	0.00133021	0.0300547	NW_006271973.1	GO:0003735;GO:0005762;GO:0032543	K02892	sordNOG13591	J	sp|Q09727|MRP20_SCHPO 54S ribosomal protein L23, mitochondrial OS=Schizosaccharomyces pombe (strain 972 / ATCC 24843) GN=mrp20 PE=3 SV=1	mitochondrial ribosomal protein L23, putative	18169205	GO:0032543//mitochondrial translation;	GO:0005762//mitochondrial large ribosomal subunit;	GO:0003735//structural constituent of ribosome;	ko03010(Ribosome)
CCM_06904	18.5812	55.2826	1.57298	0.00138053	0.0308475	NW_006271973.1	GO:0006367;GO:0005634;GO:0044446;GO:0016787	-	NOG73381;sordNOG13452;sordNOG13550;hypNOG08036	S	-	Haloacid dehalogenase-like hydrolase	18168915	GO:0006367//transcription initiation from RNA polymerase II promoter;	GO:0005634//nucleus;GO:0044446//obsolete intracellular organelle part;	GO:0016787//hydrolase activity;	-
CCM_08824	201.777	437.654	1.11703	0.00138774	0.0308475	NW_006271975.1	GO:0016021	-	sordNOG07846;NOG139032;opiNOG02463	TS	-	hypothetical protein	18170829	-	GO:0016021//integral component of membrane;	-	-
CCM_00476	39.0327	94.0802	1.26921	0.00139525	0.0309431	NW_006271969.1	GO:0006357;GO:0008270;GO:0005634;GO:0000981	-	eurotNOG11501;opiNOG50666	S	-	Fungal transcriptional regulatory protein	18162511	GO:0006357//regulation of transcription by RNA polymerase II;	GO:0005634//nucleus;	GO:0008270//zinc ion binding;GO:0000981//DNA-binding transcription factor activity, RNA polymerase II-specific;	-
CCM_07089	115.657	249.964	1.11187	0.00140397	0.0310648	NW_006271973.1	GO:0016021	-	opiNOG56399;sordNOG08260	S	-	hypothetical protein	18169100	-	GO:0016021//integral component of membrane;	-	-
CCM_00677	1378.78	6381.98	2.21061	0.00144248	0.0317716	NW_006271969.1	GO:0016021	-	NOG42379;opiNOG02845	S	-	hypothetical protein	18162711	-	GO:0016021//integral component of membrane;	-	-
CCM_06394	209.139	425.682	1.02532	0.00144582	0.0317716	NW_006271972.1	GO:0036265;GO:0030488;GO:0005829;GO:0043527;GO:0005634	K15443	sordNOG06969	R	sp|A7F9K1|TRM82_SCLS1 tRNA (guanine-N(7)-)-methyltransferase non-catalytic subunit trm82 OS=Sclerotinia sclerotiorum (strain ATCC 18683 / 1980 / Ss-1) GN=trm82 PE=3 SV=1	Quinoprotein amine dehydrogenase	18168408	GO:0036265//RNA (guanine-N7)-methylation;GO:0030488//tRNA methylation;	GO:0005829//cytosol;GO:0043527//tRNA methyltransferase complex;GO:0005634//nucleus;	-	-
CCM_01862	3656.91	14422.5	1.97963	0.00146069	0.0318832	NW_006271969.1	-	-	opiNOG47914;opiNOG66321;sordNOG14802	R	sp|Q4WLB9|CFMA_ASPFU GPI-anchored CFEM domain protein A OS=Neosartorya fumigata (strain ATCC MYA-4609 / Af293 / CBS 101355 / FGSC A1100) GN=cfmA PE=1 SV=1	CFEM domain protein	18163891	-	-	-	-
CCM_06775	79.3405	193.91	1.28925	0.00146083	0.0318832	NW_006271973.1	GO:0016787	-	necNOG12973;hypNOG06759	S	-	NUDIX domain protein	18168787	-	-	GO:0016787//hydrolase activity;	-
CCM_06613	4161.8	11795.9	1.503	0.00151466	0.0328406	NW_006271973.1	-	K01735	sordNOG08654;opiNOG12273	E	sp|Q3M6C3|DDGS_ANAVT Demethyl-4-deoxygadusol synthase OS=Anabaena variabilis (strain ATCC 29413 / PCC 7937) GN=Ava_3858 PE=1 SV=1	2-epi-5-epi-valiolone synthase	18168627	-	-	-	ko00400(Phenylalanine, tyrosine and tryptophan biosynthesis)
CCM_05088	99.5769	201.905	1.01979	0.00153506	0.0331278	NW_006271972.1	-	-	hypNOG09418	S	-	hypothetical protein	18167108	-	-	-	-
CCM_06034	51.8459	117.826	1.18436	0.00155645	0.0334393	NW_006271972.1	GO:0016021	-	hypNOG14274	S	-	hypothetical protein	18168051	-	GO:0016021//integral component of membrane;	-	-
CCM_02989	559.423	1122.41	1.00459	0.00156582	0.0335657	NW_006271970.1	-	-	opiNOG39306;sordNOG13256;NOG135430	S	-	DNA repair protein (Rad57), putative	18165016	-	-	-	-
CCM_04057	36.4903	88.4167	1.27681	0.00159417	0.0339466	NW_006271971.1	-	K18191	sordNOG14179	S	-	Ras guanyl-nucleotide exchange factor RasGEF, putative	18166080	-	-	-	ko04139(Mitophagy - yeast)
CCM_04921	887.055	2311.75	1.38189	0.00160834	0.0341727	NW_006271971.1	-	-	sordNOG13866;hypNOG01982;necNOG05561	RS	-	hypothetical protein	18166942	-	-	-	-
CCM_08686	1111.25	2352.93	1.08227	0.00165383	0.0347557	NW_006271975.1	GO:0005975;GO:0016787	-	sordNOG05835;opiNOG14387;sorNOG01480	R	sp|Q7SFB0|GUS79_NEUCR Beta-glucuronidase OS=Neurospora crassa (strain ATCC 24698 / 74-OR23-1A / CBS 708.71 / DSM 1257 / FGSC 987) GN=NCU00937 PE=1 SV=1	hypothetical protein	18170692	GO:0005975//carbohydrate metabolic process;	-	GO:0016787//hydrolase activity;	-
CCM_05065	52.0645	117.899	1.17918	0.00167909	0.034981	NW_006271972.1	GO:0003993;GO:0016311	-	opiNOG03722;opiNOG51811	R	sp|O00107|PHYA_THIHE 3-phytase A OS=Thielavia heterothallica GN=PHYA PE=1 SV=1	phytase, putative	18167085	GO:0016311//dephosphorylation;	-	GO:0003993//acid phosphatase activity;	-
CCM_09334	40.7009	105.985	1.38072	0.00169649	0.0352673	NW_006271976.1	GO:0003676;GO:0046983;GO:0007165	-	sordNOG07053;opiNOG75098;hypNOG14053;opiNOG73954	LS	-	HAT dimerization	18171337	GO:0007165//signal transduction;	-	GO:0003676//nucleic acid binding;GO:0046983//protein dimerization activity;	-
CCM_01467	21.1756	109.991	2.37691	0.00170714	0.0354121	NW_006271969.1	GO:0055085;GO:0042626;GO:0005524;GO:0016021	-	opiNOG13472;sordNOG09890	Q	sp|P32568|SNQ2_YEAST Protein SNQ2 OS=Saccharomyces cerevisiae (strain ATCC 204508 / S288c) GN=SNQ2 PE=1 SV=2	ABC multidrug transporter, putative	18163498	GO:0055085//transmembrane transport;	GO:0016021//integral component of membrane;	GO:0042626//ATPase-coupled transmembrane transporter activity;GO:0005524//ATP binding;	-
CCM_02153	5.19921	25.3363	2.28484	0.00173207	0.0357752	NW_006271970.1	-	-	-	-	-	hypothetical protein	18164181	-	-	-	-
CCM_06820	337.619	1378.49	2.02962	0.00173989	0.0358595	NW_006271973.1	GO:0000166;GO:0003723	-	sorNOG01944;sordNOG06006	TRA	sp|A9LNK9|CPSF_ARATH 30-kDa cleavage and polyadenylation specificity factor 30 OS=Arabidopsis thaliana GN=CPSF30 PE=1 SV=1	YT521-B-like splicing factor, putative	18168831	-	-	GO:0000166//nucleotide binding;GO:0003723//RNA binding;	-
CCM_04199	73.9711	155.776	1.07444	0.00174412	0.03587	NW_006271971.1	-	-	-	-	-	hypothetical protein	18166222	-	-	-	-
CCM_00450	52.5076	178.108	1.76215	0.00176995	0.0362464	NW_006271969.1	-	-	opiNOG25300;agarNOG06923	S	-	phosphatidylcholine-hydrolyzing phospholipase C	18162485	-	-	-	-
CCM_02588	108.912	218.015	1.00127	0.00178885	0.0364782	NW_006271970.1	-	-	necNOG05211;hypNOG04353	S	-	hypothetical protein	18164615	-	-	-	-
CCM_02214	63.2459	135.536	1.09963	0.00186573	0.0378591	NW_006271970.1	GO:1990429;GO:0008270;GO:0005783;GO:0016558;GO:0004842;GO:0000209;GO:0005779	K13346	opiNOG11134;sordNOG04327	O	sp|Q54S31|PEX10_DICDI Peroxisome biogenesis factor 10 OS=Dictyostelium discoideum GN=pex10 PE=3 SV=2	peroxisome assembly protein 10	18164241	GO:0016558//protein import into peroxisome matrix;GO:0000209//protein polyubiquitination;	GO:1990429//peroxisomal importomer complex;GO:0005783//endoplasmic reticulum;GO:0005779//integral component of peroxisomal membrane;	GO:0008270//zinc ion binding;GO:0004842//ubiquitin-protein transferase activity;	ko04146(Peroxisome)
CCM_04959	180.26	407.243	1.17581	0.00191051	0.038424	NW_006271971.1	-	-	-	-	-	hypothetical protein	18166979	-	-	-	-
CCM_03778	58.3735	210.011	1.84708	0.00191222	0.038424	NW_006271971.1	-	-	-	-	-	hypothetical protein	18165801	-	-	-	-
CCM_04372	8646.14	25986.3	1.58762	0.00194443	0.0389087	NW_006271971.1	-	-	sorNOG04700;opiNOG41086;sordNOG12394	S	-	hypothetical protein	18166395	-	-	-	-
CCM_00338	36.1609	86.7602	1.2626	0.00198678	0.0394929	NW_006271969.1	-	-	-	-	-	hypothetical protein	18162373	-	-	-	-
CCM_09199	68.9765	157.377	1.19005	0.00201914	0.039988	NW_006271976.1	GO:0009088;GO:0004072;GO:0016310;GO:0009089	K00928	opiNOG03785;sordNOG08577	E	sp|W7MS01|FUB3_GIBM7 Aspartate kinase FUB3 OS=Gibberella moniliformis (strain M3125 / FGSC 7600) GN=FUB3 PE=1 SV=1	aspartokinase	18171202	GO:0009088//threonine biosynthetic process;GO:0016310//phosphorylation;GO:0009089//lysine biosynthetic process via diaminopimelate;	-	GO:0004072//aspartate kinase activity;	ko00300(Lysine biosynthesis);ko00270(Cysteine and methionine metabolism);ko00261(Monobactam biosynthesis);ko00260(Glycine, serine and threonine metabolism)
CCM_05595	156.123	393.056	1.33206	0.00206289	0.0402991	NW_006271972.1	GO:0016021	-	opiNOG23387;sordNOG11235;necNOG08068	S	-	hypothetical protein	18167613	-	GO:0016021//integral component of membrane;	-	-
CCM_03318	79.1623	265.154	1.74394	0.00206879	0.0402991	NW_006271970.1	-	-	hypNOG10380;sordNOG07443	SR	sp|A0A1P8B554|THLP1_ARATH Thaumatin-like protein 1 OS=Arabidopsis thaliana GN=TLP1 PE=2 SV=1	thaumatin family protein	18165344	-	-	-	-
CCM_09356	100.899	226.177	1.16454	0.00207213	0.0402991	NW_006271977.1	GO:0008484;GO:0008152	-	COG3119;opiNOG03478	RP	sp|Q9C0V7|YHJ2_SCHPO Uncharacterized sulfatase PB10D8.02c OS=Schizosaccharomyces pombe (strain 972 / ATCC 24843) GN=SPBPB10D8.02c PE=3 SV=1	arylsulfatase, putative	18171359	GO:0008152//metabolic process;	-	GO:0008484//sulfuric ester hydrolase activity;	-
CCM_08473	5.53055	25.6152	2.2115	0.00207253	0.0402991	NW_006271975.1	GO:0018101;GO:0005737;GO:0004668;GO:0005509	-	opiNOG12085	R	sp|Q9Z183|PADI4_MOUSE Protein-arginine deiminase type-4 OS=Mus musculus GN=Padi4 PE=2 SV=3	putative protein-arginine deiminase	18170480	GO:0018101//protein citrullination;	GO:0005737//cytoplasm;	GO:0004668//protein-arginine deiminase activity;GO:0005509//calcium ion binding;	-
CCM_09165	83.7073	191.802	1.19619	0.00209577	0.0405056	NW_006271976.1	GO:0006888;GO:0005737	K20301	sordNOG07250	S	sp|Q54CU7|TPC2L_DICDI Trafficking protein particle complex subunit 2-like protein OS=Dictyostelium discoideum GN=trappc2l PE=3 SV=1	Longin-like protein	18171168	GO:0006888//endoplasmic reticulum to Golgi vesicle-mediated transport;	GO:0005737//cytoplasm;	-	-
CCM_03443	72.3868	847.282	3.54904	0.00214615	0.0411488	NW_006271970.1	-	-	sordNOG14104;opiNOG60374;sorNOG05797	S	-	hypothetical protein	18165469	-	-	-	-
CCM_07837	88.3167	214.778	1.28209	0.00216629	0.0414525	NW_006271974.1	-	-	sordNOG14105	S	-	hypothetical protein	18169847	-	-	-	-
CCM_00337	3107.34	18602	2.5817	0.00219565	0.0417651	NW_006271969.1	GO:0043565;GO:0006355;GO:0003700	-	opiNOG37756;sordNOG09571	S	-	hypothetical protein	18162372	GO:0006355//regulation of transcription, DNA-templated;	-	GO:0043565//sequence-specific DNA binding;GO:0003700//DNA-binding transcription factor activity;	-
CCM_06109	23.7255	100.67	2.08512	0.00225444	0.0427525	NW_006271972.1	-	-	opiNOG34294	S	-	Peroxiredoxin, OsmC-like protein	18168124	-	-	-	-
CCM_02173	192.379	399.677	1.05488	0.00227063	0.0429368	NW_006271970.1	GO:0015171;GO:0016021;GO:0003333	-	opiNOG16221;opiNOG50162;COG0531	E	sp|O60113|YG64_SCHPO Uncharacterized amino-acid permease C15C4.04c OS=Schizosaccharomyces pombe (strain 972 / ATCC 24843) GN=SPBC15C4.04c PE=3 SV=1	amino acid transporter, putative	18164201	GO:0003333//amino acid transmembrane transport;	GO:0016021//integral component of membrane;	GO:0015171//amino acid transmembrane transporter activity;	-
CCM_08246	1.62279	58.8398	5.18025	0.00227849	0.0430008	NW_006271975.1	GO:0055085;GO:0016021	-	sordNOG05316	G	sp|Q9US44|YIZG_SCHPO Uncharacterized transporter C1002.16c OS=Schizosaccharomyces pombe (strain 972 / ATCC 24843) GN=SPAC1002.16c PE=3 SV=1	Major facilitator superfamily transporter	18170254	GO:0055085//transmembrane transport;	GO:0016021//integral component of membrane;	-	-
CCM_03777	682.778	2592.07	1.92461	0.00229088	0.0431501	NW_006271971.1	GO:0001077;GO:0060237;GO:0045944;GO:0000978;GO:0005634;GO:0046872;GO:0005829;GO:0071322	-	sordNOG07334;NOG01669	R	-	zinc finger protein OZF	18165800	GO:0060237//regulation of fungal-type cell wall organization;GO:0045944//positive regulation of transcription by RNA polymerase II;GO:0071322//cellular response to carbohydrate stimulus;	GO:0005634//nucleus;GO:0005829//cytosol;	GO:0000978//RNA polymerase II cis-regulatory region sequence-specific DNA binding;GO:0046872//metal ion binding;	-
CCM_03986	18705.8	51441	1.45943	0.0023745	0.0443777	NW_006271971.1	GO:0003676;GO:0006355;GO:0003700;GO:0005634	-	sordNOG06068	R	-	Zinc finger domain-containing protein, C2H2-type	18166009	GO:0006355//regulation of transcription, DNA-templated;	GO:0005634//nucleus;	GO:0003676//nucleic acid binding;GO:0003700//DNA-binding transcription factor activity;	-
CCM_09006	0	15.0203	Inf	0.00243614	0.0453537	NW_006271975.1	GO:0016758;GO:0008152	-	sordNOG04809;opiNOG27140;sorNOG06570;opiNOG76682	S	sp|A0A1B4XBH6|SDNJ_SORAA Glycosyltransferase sdnJ OS=Sordaria araneosa GN=sdnJ PE=1 SV=1	UDP-glucoronosyl and UDP-glucosyl transferase, putative	18171010	GO:0008152//metabolic process;	-	GO:0016758//hexosyltransferase activity;	-
CCM_05704	615.133	1700.83	1.46727	0.0024993	0.0460838	NW_006271972.1	GO:0003676;GO:0016021;GO:0008270;GO:0055085	-	opiNOG51758	R	sp|Q8K1P8|MOT8_RAT Monocarboxylate transporter 8 OS=Rattus norvegicus GN=SLC16A2 PE=1 SV=1	MFS monocarboxylate transporter	18167722	GO:0055085//transmembrane transport;	GO:0016021//integral component of membrane;	GO:0003676//nucleic acid binding;GO:0008270//zinc ion binding;	-
CCM_07922	88.684	188.484	1.0877	0.0025173	0.0462385	NW_006271974.1	GO:0055114;GO:0016491	-	opiNOG53024;sordNOG10321;opiNOG22969	I	-	hypothetical protein	18169932	GO:0055114//obsolete oxidation-reduction process;	-	GO:0016491//oxidoreductase activity;	-
CCM_08724	8.79759	32.4469	1.8829	0.00253065	0.0463071	NW_006271975.1	GO:0008430	-	opiNOG11628;sordNOG04150;sorNOG06407	S	-	selenium-binding protein	18170730	-	-	GO:0008430//selenium binding;	-
CCM_01929	7.18429	46.0602	2.6806	0.00253893	0.0463704	NW_006271969.1	-	-	-	-	-	hypothetical protein	18163958	-	-	-	-
CCM_00228	16.952	48.5015	1.51658	0.00258851	0.0471864	NW_006271969.1	-	-	-	-	-	hypothetical protein	18162263	-	-	-	-
CCM_04894	50.512	111.129	1.13754	0.00261834	0.0475527	NW_006271971.1	GO:0003735;GO:0005763;GO:0006412	K02959	sordNOG13799	J	sp|P08580|RT16_NEUCR Ribosomal protein S16, mitochondrial OS=Neurospora crassa (strain ATCC 24698 / 74-OR23-1A / CBS 708.71 / DSM 1257 / FGSC 987) GN=cyt-21 PE=3 SV=2	mitochondrial ribosomal protein S16	18166915	GO:0006412//translation;	GO:0005763//mitochondrial small ribosomal subunit;	GO:0003735//structural constituent of ribosome;	ko03010(Ribosome)
CCM_09256	39.4544	97.3317	1.30272	0.00273015	0.0486624	NW_006271976.1	-	-	-	-	-	hypothetical protein	18171259	-	-	-	-
CCM_03508	322.723	687.008	1.09003	0.00276265	0.0489695	NW_006271970.1	-	-	sordNOG15120	R	-	hypothetical protein	18165534	-	-	-	-
CCM_01846	29.0351	71.4342	1.29882	0.00278418	0.0491701	NW_006271969.1	-	-	-	-	-	hypothetical protein	18163875	-	-	-	-
CCM_04007	34.5806	147.598	2.09363	0.00280405	0.0494304	NW_006271971.1	-	-	-	-	-	hypothetical protein	18166030	-	-	-	-
CCM_07004	314.587	950.285	1.5949	0.00281103	0.0494629	NW_006271973.1	GO:0005634;GO:0000981;GO:0006357;GO:0008270	-	necNOG08628;hypNOG02818	S	sp|D7PI10|GSFR2_PENAE Transcription factor gsfR2 OS=Penicillium aethiopicum GN=gsfR2 PE=1 SV=1	C6 zinc finger domain protein	18169015	GO:0006357//regulation of transcription by RNA polymerase II;	GO:0005634//nucleus;	GO:0000981//DNA-binding transcription factor activity, RNA polymerase II-specific;GO:0008270//zinc ion binding;	-
CCM_00007	241.487	698.559	1.53244	0.00282737	0.0496053	NW_006271969.1	GO:0015935;GO:0006412;GO:0005739;GO:0003735	K02950	sordNOG12573;opiNOG30164	J	sp|O14182|RT12_SCHPO Probable 37S ribosomal protein S12, mitochondrial OS=Schizosaccharomyces pombe (strain 972 / ATCC 24843) GN=mrps12 PE=3 SV=3	37S ribosomal protein S12	18162042	GO:0006412//translation;	GO:0015935//small ribosomal subunit;GO:0005739//mitochondrion;	GO:0003735//structural constituent of ribosome;	ko03010(Ribosome)
CCM_07201	65.2489	138.627	1.08718	0.00282943	0.0496053	NW_006271973.1	-	-	opiNOG28911;sordNOG07666;sorNOG06886	S	-	hypothetical protein	18169212	-	-	-	-
CCM_09559	1427.58	3899.04	1.44955	0.00293446	0.0510745	NW_006271977.1	GO:0032259;GO:0008168	-	opiNOG02652;NOG71881;opiNOG57352	SI	sp|A0A1B4XBG9|SDND_SORAA Methyltransferase sdnD OS=Sordaria araneosa GN=sdnD PE=3 SV=1	amino acid adenylation domain-containing protein	18171561	GO:0032259//methylation;	-	GO:0008168//methyltransferase activity;	-
CCM_04422	344.124	5085.61	3.88542	0.00300157	0.0518674	NW_006271971.1	GO:0000166;GO:0019722;GO:0005622	-	opiNOG27318;sordNOG05018;hypNOG01674	S	sp|Q5RES7|RCAN1_PONAB Calcipressin-1 OS=Pongo abelii GN=RCAN1 PE=2 SV=1	calcineurin binding protein, putative	18166445	GO:0019722//calcium-mediated signaling;	GO:0005622//intracellular anatomical structure;	GO:0000166//nucleotide binding;	-
CCM_06806	5.54353	27.5457	2.31295	0.00310822	0.0531379	NW_006271973.1	GO:0016021	-	pleNOG02887;hypNOG05959;opiNOG30802	S	-	integral membrane protein, putative	18168817	-	GO:0016021//integral component of membrane;	-	-
CCM_07087	77.1828	156.94	1.02387	0.00312004	0.0532453	NW_006271973.1	-	-	opiNOG50367;sordNOG11325	S	-	hypothetical protein	18169098	-	-	-	-
CCM_08139	1647.65	4191.91	1.3472	0.00315673	0.0535865	NW_006271974.1	-	-	sordNOG15060;hypNOG11337;opiNOG43165	S	-	hypothetical protein	18170148	-	-	-	-
CCM_08827	252.823	765.659	1.59857	0.00317395	0.053784	NW_006271975.1	GO:0051213;GO:0055114	K19245	sorNOG02663;opiNOG04653	I	sp|Q12358|JLP1_YEAST Alpha-ketoglutarate-dependent sulfonate dioxygenase OS=Saccharomyces cerevisiae (strain ATCC 204508 / S288c) GN=JLP1 PE=1 SV=1	Taurine catabolism dioxygenase TauD/TfdA	18170832	GO:0055114//obsolete oxidation-reduction process;	-	GO:0051213//dioxygenase activity;	-
CCM_02660	37.2997	85.3648	1.19448	0.00323182	0.0546683	NW_006271970.1	GO:0003677	-	sordNOG09738;opiNOG39422	S	-	DNA-binding protein	18164687	-	-	GO:0003677//DNA binding;	-
CCM_08553	10.0746	39.0956	1.95629	0.00336691	0.0561446	NW_006271975.1	-	-	-	-	-	hypothetical protein	18170560	-	-	-	-
CCM_04043	34.1649	78.821	1.20607	0.0033754	0.0561446	NW_006271971.1	GO:0046872;GO:0055114;GO:0016491	-	sordNOG11903	S	sp|A7BHQ9|TYRO_PHONA Tyrosinase OS=Pholiota nameko GN=tyr1 PE=1 SV=1	tyrosinase	18166066	GO:0055114//obsolete oxidation-reduction process;	-	GO:0046872//metal ion binding;GO:0016491//oxidoreductase activity;	-
CCM_02204	2038.15	5618.93	1.46303	0.00337742	0.0561446	NW_006271970.1	GO:0055114;GO:0016021;GO:0016620	-	-	-	-	hypothetical protein	18164231	GO:0055114//obsolete oxidation-reduction process;	GO:0016021//integral component of membrane;	GO:0016620//oxidoreductase activity, acting on the aldehyde or oxo group of donors, NAD or NADP as acceptor;	-
CCM_05885	68.977	139.537	1.01646	0.00351305	0.0579792	NW_006271972.1	GO:0010181;GO:0055114;GO:0016491	-	opiNOG25653;sordNOG10762	C	sp|Q6UEF0|NADA_ASPPU NADH-dependent flavin oxidoreductase nadA OS=Aspergillus parasiticus (strain ATCC 56775 / NRRL 5862 / SRRC 143 / SU-1) GN=nadA PE=2 SV=1	FMN binding oxidoreductase, putative	18167903	GO:0055114//obsolete oxidation-reduction process;	-	GO:0010181//FMN binding;GO:0016491//oxidoreductase activity;	-
CCM_07655	1195.51	4143.95	1.79338	0.00353875	0.0581177	NW_006271974.1	-	-	opiNOG17263;sordNOG06920	S	sp|Q9M2G8|IQM6_ARATH IQ domain-containing protein IQM6 OS=Arabidopsis thaliana GN=IQM6 PE=2 SV=1	IQ calmodulin-binding protein	18169665	-	-	-	-
CCM_04122	5801.55	14780.9	1.34922	0.00354762	0.0581177	NW_006271971.1	GO:0005975;GO:0004553	K01199	sordNOG07718;opiNOG20134	RG	sp|Q5AUT0|EGLC_EMENI Probable glucan endo-1,3-beta-glucosidase eglC OS=Emericella nidulans (strain FGSC A4 / ATCC 38163 / CBS 112.46 / NRRL 194 / M139) GN=eglC PE=1 SV=1	GPI-anchored cell wall beta-1,3-endoglucanase EglC	18166145	GO:0005975//carbohydrate metabolic process;	-	GO:0004553//hydrolase activity, hydrolyzing O-glycosyl compounds;	ko00500(Starch and sucrose metabolism)
CCM_01490	764.089	3399.84	2.15366	0.00363542	0.0586175	NW_006271969.1	GO:0003830;GO:0016021;GO:0006487	K00737	sordNOG04859;sordNOG07996	G	sp|Q09327|MGAT3_HUMAN Beta-1,4-mannosyl-glycoprotein 4-beta-N-acetylglucosaminyltransferase OS=Homo sapiens GN=MGAT3 PE=2 SV=3	glycosyl transferase family 17 protein	18163521	GO:0006487//protein N-linked glycosylation;	GO:0016021//integral component of membrane;	GO:0003830//beta-1,4-mannosylglycoprotein 4-beta-N-acetylglucosaminyltransferase activity;	ko00510(N-Glycan biosynthesis)
CCM_01107	22.8478	58.6708	1.36059	0.00364394	0.0586175	NW_006271969.1	-	-	-	-	-	hypothetical protein	18163140	-	-	-	-
CCM_05842	8729.66	21122.5	1.27478	0.00385038	0.0610543	NW_006271972.1	-	-	-	-	-	hypothetical protein	18167860	-	-	-	-
CCM_07836	125.758	269.385	1.09902	0.00388256	0.0611992	NW_006271974.1	-	-	-	-	-	hypothetical protein	18169846	-	-	-	-
CCM_06111	6.51811	34.8208	2.41742	0.00388496	0.0611992	NW_006271972.1	-	-	opiNOG22540;COG2940	BR	sp|O74467|SET5_SCHPO SET domain-containing protein 5 OS=Schizosaccharomyces pombe (strain 972 / ATCC 24843) GN=set5 PE=1 SV=1	TPR domain protein	18168126	-	-	-	-
CCM_01531	593.312	2279.71	1.94199	0.00389684	0.0612861	NW_006271969.1	GO:0016021;GO:0055085	K08157	opiNOG03553;sordNOG05769	R	sp|O59700|YN43_SCHPO Uncharacterized transporter C36.03c OS=Schizosaccharomyces pombe (strain 972 / ATCC 24843) GN=SPBC36.03c PE=3 SV=1	MFS multidrug transporter, putative	18163562	GO:0055085//transmembrane transport;	GO:0016021//integral component of membrane;	-	-
CCM_02583	2.28748	15.8576	2.79335	0.00394114	0.0615107	NW_006271970.1	-	-	-	-	-	hypothetical protein	18164610	-	-	-	-
CCM_09029	22.5698	94.5137	2.06613	0.00394308	0.0615107	NW_006271975.1	GO:0016884;GO:0016740	K09117	opiNOG33497;sordNOG14079	S	sp|B2WMX8|AIM41_PYRTR Altered inheritance of mitochondria protein 41, mitochondrial OS=Pyrenophora tritici-repentis (strain Pt-1C-BFP) GN=AIM41 PE=3 SV=1	Aspartyl/glutamyl-tRNA amidotransferase subunit B, putative	18171033	-	-	GO:0016884//carbon-nitrogen ligase activity, with glutamine as amido-N-donor;GO:0016740//transferase activity;	-
CCM_02350	49.503	105.32	1.08919	0.00403752	0.0626793	NW_006271970.1	GO:0002949;GO:0016747;GO:0006508;GO:0004252;GO:0072670;GO:0004222;GO:0005739	K01409	sordNOG04897;opiNOG08466	OS	sp|O94710|QRI7_SCHPO tRNA N6-adenosine threonylcarbamoyltransferase, mitochondrial OS=Schizosaccharomyces pombe (strain 972 / ATCC 24843) GN=pgp1 PE=3 SV=1	O-sialoglycoprotein endopeptidase, putative	18164377	GO:0002949//tRNA threonylcarbamoyladenosine modification;GO:0006508//proteolysis;GO:0072670//mitochondrial tRNA threonylcarbamoyladenosine modification;	GO:0005739//mitochondrion;	GO:0016747//acyltransferase activity, transferring groups other than amino-acyl groups;GO:0004252//serine-type endopeptidase activity;GO:0004222//metalloendopeptidase activity;	-
CCM_02954	12267	33270.7	1.43947	0.00408818	0.0632616	NW_006271970.1	GO:0005524;GO:0005634;GO:0005829	K09489	sordNOG05897;opiNOG00606	O	sp|O74225|HSP88_NEUCR Heat shock protein hsp88 OS=Neurospora crassa (strain ATCC 24698 / 74-OR23-1A / CBS 708.71 / DSM 1257 / FGSC 987) GN=hsp88 PE=1 SV=1	Hsp70 chaperone Hsp88	18164981	-	GO:0005634//nucleus;GO:0005829//cytosol;	GO:0005524//ATP binding;	ko05417(Lipid and atherosclerosis);ko04612(Antigen processing and presentation);ko04530(Tight junction)
CCM_05843	16463.8	39274.5	1.25429	0.00412354	0.0635274	NW_006271972.1	GO:2000220;GO:0034613;GO:0005524;GO:0010494;GO:0005634;GO:0005829;GO:0016242;GO:0031929;GO:0004674;GO:0006468	-	opiNOG13241;sordNOG05601	T	sp|O14328|KSP1_SCHPO Serine/threonine-protein kinase ksp1 OS=Schizosaccharomyces pombe (strain 972 / ATCC 24843) GN=ksp1 PE=1 SV=1	serine/threonine protein kinase, putative	18167861	GO:2000220//regulation of pseudohyphal growth;GO:0034613//cellular protein localization;GO:0016242//negative regulation of macroautophagy;GO:0031929//TOR signaling;GO:0006468//protein phosphorylation;	GO:0010494//cytoplasmic stress granule;GO:0005634//nucleus;GO:0005829//cytosol;	GO:0005524//ATP binding;GO:0004674//protein serine/threonine kinase activity;	-
CCM_00690	46.6183	99.3158	1.09113	0.00422403	0.0644316	NW_006271969.1	-	-	-	-	-	hypothetical protein	18162724	-	-	-	-
CCM_05372	10.089	32.8612	1.7036	0.00443543	0.0663935	NW_006271972.1	-	-	opiNOG28313;sordNOG04267;opiNOG36993;euroNOG11263	QRS	sp|A0A097ZPD4|ANDH_EMEVA Oxidoreductase andH OS=Emericella variicolor GN=andH PE=1 SV=1	short-chain dehydrogenases/reductase, putative	18167390	-	-	-	-
CCM_00076	119.75	268.866	1.16686	0.00444866	0.0664415	NW_006271969.1	GO:0016021	-	opiNOG47684	S	-	hypothetical protein	18162111	-	GO:0016021//integral component of membrane;	-	-
CCM_02733	29.0555	110.846	1.93168	0.00445774	0.0664415	NW_006271970.1	-	-	-	-	-	hypothetical protein	18164760	-	-	-	-
CCM_00548	61.7503	472.156	2.93475	0.00451365	0.0669397	NW_006271969.1	-	-	sordNOG04052;opiNOG16822	S	-	hypothetical protein	18162583	-	-	-	-
CCM_08665	14.9834	48.8664	1.70548	0.00456084	0.0674317	NW_006271975.1	-	-	sordNOG09106;opiNOG29072	R	-	extracellular protein	18170671	-	-	-	-
CCM_04132	87.6371	196.041	1.16154	0.00462207	0.0679347	NW_006271971.1	GO:0016301;GO:0016310	-	sordNOG06735;opiNOG18087	S	-	Protein kinase-like domain	18166155	GO:0016310//phosphorylation;	-	GO:0016301//kinase activity;	-
CCM_07446	4448.46	29668	2.73753	0.00469037	0.0684678	NW_006271974.1	GO:0006282;GO:0032436;GO:0036003;GO:0001077;GO:0000978;GO:0000122;GO:0046872;GO:0005634;GO:0000502	-	sordNOG08358;opiNOG15724	RK	sp|Q9Y815|RSV2_SCHPO Zinc finger protein rsv2 OS=Schizosaccharomyces pombe (strain 972 / ATCC 24843) GN=rsv2 PE=4 SV=1	C2H2 transcription factor (Rpn4), putative	18169457	GO:0006282//regulation of DNA repair;GO:0032436//positive regulation of proteasomal ubiquitin-dependent protein catabolic process;GO:0036003//positive regulation of transcription from RNA polymerase II promoter in response to stress;GO:0000122//negative regulation of transcription by RNA polymerase II;	GO:0005634//nucleus;GO:0000502//proteasome complex;	GO:0000978//RNA polymerase II cis-regulatory region sequence-specific DNA binding;GO:0046872//metal ion binding;	-
CCM_07799	486.986	1808.31	1.89269	0.00471132	0.0686028	NW_006271974.1	-	-	sordNOG14755;opiNOG48938	S	sp|Q8S8S9|MES1_ARATH Methylesterase 1 OS=Arabidopsis thaliana GN=MES1 PE=1 SV=1	hypothetical protein	18169809	-	-	-	-
CCM_05737	39.7234	87.3715	1.13717	0.00476797	0.0692182	NW_006271972.1	-	-	-	-	-	hypothetical protein	18167755	-	-	-	-
CCM_06250	430.483	939.957	1.12664	0.00489714	0.0705613	NW_006271972.1	GO:0007166;GO:0003676;GO:0016021;GO:0004888	-	sordNOG11648;NOG05515	ST	-	hypothetical protein	18168265	GO:0007166//cell surface receptor signaling pathway;	GO:0016021//integral component of membrane;	GO:0003676//nucleic acid binding;GO:0004888//transmembrane signaling receptor activity;	-
CCM_06047	0.975071	21.0321	4.43094	0.00491289	0.070577	NW_006271972.1	GO:0016021	-	-	-	-	hypothetical protein	18168064	-	GO:0016021//integral component of membrane;	-	-
CCM_05504	6.85693	25.7948	1.91145	0.00492282	0.0706142	NW_006271972.1	GO:0016021	-	-	-	-	hypothetical protein	18167522	-	GO:0016021//integral component of membrane;	-	-
CCM_02755	98.4088	341.469	1.7949	0.00497157	0.070944	NW_006271970.1	GO:0016021;GO:0019915;GO:0005789	-	opiNOG27087;sordNOG04974;opiNOG43179;sorNOG05761	IS	sp|Q9HGM4|SCS3_SCHPO FIT family protein scs3 OS=Schizosaccharomyces pombe (strain 972 / ATCC 24843) GN=scs3 PE=3 SV=1	alpha-galactosidase	18164782	GO:0019915//lipid storage;	GO:0016021//integral component of membrane;GO:0005789//endoplasmic reticulum membrane;	-	-
CCM_05731	151.08	442.252	1.54955	0.0049753	0.070944	NW_006271972.1	GO:0016021	-	opiNOG18398;pleNOG08003	S	-	hypothetical protein	18167749	-	GO:0016021//integral component of membrane;	-	-
CCM_07701	3349.21	8426.81	1.33116	0.00503044	0.0713077	NW_006271974.1	-	-	opiNOG62153;opiNOG46263;NOG173760;necNOG08931	S	-	hypothetical protein	18169711	-	-	-	-
CCM_08062	28.0495	65.9606	1.23363	0.00506267	0.0715539	NW_006271974.1	-	-	-	-	-	hypothetical protein	18170071	-	-	-	-
CCM_07863	29.6828	73.8725	1.31541	0.00510258	0.0720123	NW_006271974.1	GO:0055114;GO:0016491;GO:0008270	-	sordNOG11654	Q	sp|A1CFL1|PATD_ASPCL Alcohol dehydrogenase patD OS=Aspergillus clavatus (strain ATCC 1007 / CBS 513.65 / DSM 816 / NCTC 3887 / NRRL 1) GN=patD PE=1 SV=1	alcohol dehydrogenase	18169873	GO:0055114//obsolete oxidation-reduction process;	-	GO:0016491//oxidoreductase activity;GO:0008270//zinc ion binding;	-
CCM_08919	463.964	1268.68	1.45124	0.00514097	0.0724478	NW_006271975.1	-	-	hypNOG12757;necNOG13939	S	-	hypothetical protein	18170924	-	-	-	-
CCM_07082	76.57	296.793	1.95461	0.00516813	0.0726179	NW_006271973.1	GO:0005759;GO:0051087;GO:0006457;GO:0006986;GO:0050821;GO:0008270;GO:0030150	K17808	sordNOG13685;opiNOG41804	S	sp|Q09759|YA72_SCHPO Uncharacterized protein C24H6.02c OS=Schizosaccharomyces pombe (strain 972 / ATCC 24843) GN=SPAC24H6.02c PE=4 SV=1	DNL zinc finger domain containing protein	18169093	GO:0006457//protein folding;GO:0006986//response to unfolded protein;GO:0050821//protein stabilization;GO:0030150//protein import into mitochondrial matrix;	GO:0005759//mitochondrial matrix;	GO:0051087//chaperone binding;GO:0008270//zinc ion binding;	-
CCM_08481	5.55451	22.9123	2.04439	0.00521814	0.0729573	NW_006271975.1	-	-	-	-	-	hypothetical protein	18170488	-	-	-	-
CCM_02506	1092.53	3900.12	1.83585	0.00530023	0.0736143	NW_006271970.1	GO:0004096;GO:0055114;GO:0098869;GO:0020037;GO:0006979;GO:0042744;GO:0046872	K03781	sordNOG04138	P	sp|Q9C168|CAT1_NEUCR Catalase-1 OS=Neurospora crassa (strain ATCC 24698 / 74-OR23-1A / CBS 708.71 / DSM 1257 / FGSC 987) GN=cat-1 PE=1 SV=2	catalase A	18164533	GO:0055114//obsolete oxidation-reduction process;GO:0098869//cellular oxidant detoxification;GO:0006979//response to oxidative stress;GO:0042744//hydrogen peroxide catabolic process;	-	GO:0004096//catalase activity;GO:0020037//heme binding;GO:0046872//metal ion binding;	ko05208(Chemical carcinogenesis - reactive oxygen species);ko05022(Pathways of neurodegeneration - multiple diseases);ko05014(Amyotrophic lateral sclerosis);ko04213(Longevity regulating pathway - multiple species);ko04212(Longevity regulating pathway - worm);ko04211(Longevity regulating pathway);ko04146(Peroxisome);ko04068(FoxO signaling pathway);ko04016(MAPK signaling pathway - plant);ko04011(MA…
CCM_03774	19.5688	50.3029	1.36209	0.00537109	0.0741878	NW_006271971.1	-	-	-	-	-	hypothetical protein	18165797	-	-	-	-
CCM_08878	14.6236	41.1468	1.49249	0.00544182	0.0749321	NW_006271975.1	-	-	onyNOG08284;opiNOG62687	R	-	hypothetical protein	18170883	-	-	-	-
CCM_09558	2700.23	6541.13	1.27646	0.00549752	0.075483	NW_006271977.1	GO:0016758;GO:0008152	-	sordNOG09071	S	sp|Q8KHE4|REBG_NOCAE 4&apos;-demethylrebeccamycin synthase OS=Lechevalieria aerocolonigenes GN=rebG PE=1 SV=1	putative glycosyltransferase	18171560	GO:0008152//metabolic process;	-	GO:0016758//hexosyltransferase activity;	-
CCM_04842	10.7512	34.1038	1.66543	0.00559966	0.0761199	NW_006271971.1	GO:0050662;GO:0016853	-	sordNOG12409;COG0451	MV	sp|Q9UT59|YKJ7_SCHPO Putative uncharacterized oxidoreductase C513.07 OS=Schizosaccharomyces pombe (strain 972 / ATCC 24843) GN=SPAC513.07 PE=3 SV=1	3-beta hydroxysteroid dehydrogenase/isomerase, putative	18166863	-	-	GO:0050662//obsolete coenzyme binding;GO:0016853//isomerase activity;	-
CCM_08554	167.707	519.398	1.6309	0.00570641	0.0770326	NW_006271975.1	-	-	sordNOG14822;sordNOG15756;hypNOG13117;sordNOG15796	S	-	hypothetical protein	18170561	-	-	-	-
CCM_04143	982.145	3427.63	1.8032	0.00577163	0.0774777	NW_006271971.1	GO:0030915;GO:0016021;GO:0006281	-	sordNOG08552	S	-	hypothetical protein	18166166	GO:0006281//DNA repair;	GO:0030915//Smc5-Smc6 complex;GO:0016021//integral component of membrane;	-	-
CCM_08420	3.25206	17.4941	2.42744	0.00600346	0.0794818	NW_006271975.1	GO:0016021	-	-	-	-	hypothetical protein	18170428	-	GO:0016021//integral component of membrane;	-	-
CCM_03562	7.18578	26.1707	1.86473	0.00606139	0.0801386	NW_006271970.1	GO:0016042;GO:0004806	-	opiNOG01243	R	sp|D4AX63|LIPA_ARTBC Lipase A OS=Arthroderma benhamiae (strain ATCC MYA-4681 / CBS 112371) GN=ARB_00790 PE=3 SV=1	secretory lipase, putative	18165588	GO:0016042//lipid catabolic process;	-	GO:0004806//triglyceride lipase activity;	-
CCM_06183	316.282	936.731	1.56642	0.0060909	0.0804182	NW_006271972.1	GO:0004527;GO:0090305;GO:0004519	K19619	agaNOG06472;magNOG12728;sordNOG15527;opiNOG29302	RS	-	Endonuclease/exonuclease/phosphatase	18168198	GO:0090305//nucleic acid phosphodiester bond hydrolysis;	-	GO:0004527//exonuclease activity;GO:0004519//endonuclease activity;	-
CCM_03551	10.4289	35.0091	1.74715	0.00619659	0.0814783	NW_006271970.1	-	-	-	-	-	hypothetical protein	18165577	-	-	-	-
CCM_09298	1.30442	36.4923	4.80611	0.00631562	0.0825921	NW_006271976.1	GO:0008080	-	opiNOG59061;sordNOG14430;sordNOG14651	R	-	GNAT family acetyltransferase, putative	18171301	-	-	GO:0008080//N-acetyltransferase activity;	-
CCM_02833	18.8856	48.4894	1.36038	0.00641478	0.0836118	NW_006271970.1	GO:0055114;GO:0051213;GO:0020037	K00463	opiNOG06527	E	sp|P47125|I23O_YEAST Indoleamine 2,3-dioxygenase OS=Saccharomyces cerevisiae (strain ATCC 204508 / S288c) GN=BNA2 PE=1 SV=1	indoleamine 2,3-dioxygenase	18164860	GO:0055114//obsolete oxidation-reduction process;	-	GO:0051213//dioxygenase activity;GO:0020037//heme binding;	ko05143(African trypanosomiasis);ko00380(Tryptophan metabolism)
CCM_08008	14.6715	40.3801	1.46063	0.00644702	0.0837433	NW_006271974.1	-	-	COG1680;opiNOG50221	RV	sp|Q8XBJ0|YFEW_ECO57 UPF0214 protein YfeW OS=Escherichia coli O157:H7 GN=yfeW PE=3 SV=1	beta-lactamase, putative	18170017	-	-	-	-
CCM_09404	34.5397	76.7762	1.1524	0.00651745	0.0843297	NW_006271977.1	-	-	-	-	-	hypothetical protein	18171407	-	-	-	-
CCM_01834	1736.64	3478.28	1.00207	0.00654559	0.0844266	NW_006271969.1	GO:0046872	-	opiNOG18955;sordNOG11014	SR	-	Zinc finger domain-containing protein, C2H2-type	18163863	-	-	GO:0046872//metal ion binding;	-
CCM_09594	14.667	87.4314	2.57558	0.00657961	0.0846295	NW_006271978.1	-	-	-	-	-	hypothetical protein	18171596	-	-	-	-
CCM_00678	1299.19	3766.83	1.53574	0.00663404	0.0849104	NW_006271969.1	GO:0050660;GO:0003997;GO:0006635;GO:0005777	K00232	opiNOG02652	I	sp|Q8HYL8|ACOX1_PHACI Peroxisomal acyl-coenzyme A oxidase 1 OS=Phascolarctos cinereus GN=ACOX1 PE=1 SV=2	Acyl-CoA oxidase	18162712	GO:0006635//fatty acid beta-oxidation;	GO:0005777//peroxisome;	GO:0050660//flavin adenine dinucleotide binding;GO:0003997//acyl-CoA oxidase activity;	ko04936(Alcoholic liver disease);ko04146(Peroxisome);ko04024(cAMP signaling pathway);ko03320(PPAR signaling pathway);ko01040(Biosynthesis of unsaturated fatty acids);ko00640(Propanoate metabolism);ko00592(alpha-Linolenic acid metabolism);ko00410(beta-Alanine metabolism);ko00071(Fatty acid degradation)
CCM_05684	200.815	448.24	1.1584	0.00665379	0.0849834	NW_006271972.1	GO:0003899;GO:0006359	K03024	sordNOG13921;NOG74705	FK	-	DNA-directed RNA polymerase, III, C31 subunit, fungi	18167702	GO:0006359//regulation of transcription by RNA polymerase III;	-	GO:0003899//DNA-directed 5'-3' RNA polymerase activity;	ko04623(Cytosolic DNA-sensing pathway);ko03020(RNA polymerase)
CCM_04555	12.3885	35.7498	1.52893	0.0066687	0.0849834	NW_006271971.1	GO:0016021	-	hypNOG13831;hypNOG11913;necNOG13118;chaNOG05565	S	-	hypothetical protein	18166578	-	GO:0016021//integral component of membrane;	-	-
CCM_07883	357.939	848.179	1.24465	0.00671777	0.0853015	NW_006271974.1	GO:0006355	-	-	-	-	Paired amphipathic helix	18169893	GO:0006355//regulation of transcription, DNA-templated;	-	-	-
CCM_08488	116.086	300.4	1.37169	0.00678798	0.0859662	NW_006271975.1	GO:0003735;GO:0005762	-	sordNOG13810;opiNOG39273	JS	sp|P22354|RM20_YEAST 54S ribosomal protein L20, mitochondrial OS=Saccharomyces cerevisiae (strain ATCC 204508 / S288c) GN=MRPL20 PE=1 SV=2	60S ribosomal protein L20, putative	18170495	-	GO:0005762//mitochondrial large ribosomal subunit;	GO:0003735//structural constituent of ribosome;	-
CCM_02368	50.2426	102.163	1.02389	0.00680213	0.0860031	NW_006271970.1	GO:0016301;GO:0016787;GO:0016310	-	sordNOG12732;opiNOG18449	F	sp|P47173|YJ9J_YEAST Uncharacterized protein YJR142W OS=Saccharomyces cerevisiae (strain ATCC 204508 / S288c) GN=YJR142W PE=1 SV=1	thiamin pyrophosphokinase-related protein	18164395	GO:0016310//phosphorylation;	-	GO:0016301//kinase activity;GO:0016787//hydrolase activity;	-
CCM_05705	43.6686	92.0048	1.07511	0.00688225	0.0864773	NW_006271972.1	GO:0016021	-	eurotNOG00929;opiNOG23998	S	-	Regulator of G protein signaling superfamily	18167723	-	GO:0016021//integral component of membrane;	-	-
CCM_03775	4.21515	19.3514	2.19878	0.00696582	0.0868654	NW_006271971.1	-	-	-	-	-	hypothetical protein	18165798	-	-	-	-
CCM_07438	868.626	5406.71	2.63794	0.00696728	0.0868654	NW_006271974.1	-	-	sordNOG13498;sordNOG12793	ST	-	Regulator of G protein signaling superfamily	18169449	-	-	-	-
CCM_05264	33.1654	92.6149	1.48157	0.00703619	0.0870479	NW_006271972.1	-	-	opiNOG15415;sorNOG02007;sordNOG09197;opiNOG32833	S	-	hypothetical protein	18167283	-	-	-	-
CCM_04419	254.54	529.263	1.05609	0.00705137	0.0871114	NW_006271971.1	GO:0055085;GO:0016021	K13577	sordNOG07478;opiNOG03781	C	sp|Q06143|DIC1_YEAST Mitochondrial dicarboxylate transporter OS=Saccharomyces cerevisiae (strain ATCC 204508 / S288c) GN=DIC1 PE=1 SV=1	mitochondrial dicarboxylate carrier, putative	18166442	GO:0055085//transmembrane transport;	GO:0016021//integral component of membrane;	-	ko04964(Proximal tubule bicarbonate reclamation)
CCM_05758	693.028	1538.22	1.15028	0.00705942	0.0871114	NW_006271972.1	-	-	NOG106655;necNOG13468;hypNOG13796	SB	-	Chromo domain	18167776	-	-	-	-
CCM_04579	18.5498	64.4874	1.79761	0.00718464	0.0878215	NW_006271971.1	-	-	-	-	-	hypothetical protein	18166602	-	-	-	-
CCM_08580	238.861	508.571	1.09028	0.00718996	0.0878215	NW_006271975.1	GO:0005758;GO:0018063;GO:0004408;GO:0005829;GO:0005634	K01764	opiNOG04884	OC	sp|O13962|YE42_SCHPO Putative cytochrome c1 heme lyase OS=Schizosaccharomyces pombe (strain 972 / ATCC 24843) GN=SPAC24C9.02c PE=3 SV=1	cytochrome C1 heme lyase	18170586	GO:0018063//cytochrome c-heme linkage;	GO:0005758//mitochondrial intermembrane space;GO:0005829//cytosol;GO:0005634//nucleus;	GO:0004408//holocytochrome-c synthase activity;	ko00860(Porphyrin metabolism)
CCM_04253	173.723	528.249	1.60443	0.00721354	0.0879979	NW_006271971.1	-	-	opiNOG43301;opiNOG60496;euroNOG13081;eurotNOG13000	RS	-	hypothetical protein	18166276	-	-	-	-
CCM_09154	48.9696	139.85	1.51392	0.00728377	0.0885495	NW_006271976.1	-	-	sordNOG06658;opiNOG22526	S	sp|Q0TVF9|ALG3_PHANO Dol-P-Man:Man(5)GlcNAc(2)-PP-Dol alpha-1,3-mannosyltransferase OS=Phaeosphaeria nodorum (strain SN15 / ATCC MYA-4574 / FGSC 10173) GN=ALG3 PE=3 SV=2	hypothetical protein	18171157	-	-	-	-
CCM_00455	2.60684	15.1731	2.54114	0.00744469	0.089906	NW_006271969.1	GO:0055085;GO:0016021	-	opiNOG17043;COG0477	G	sp|A0A089FNE5|PRLL_FUNXX MFS transporter prlL OS=Fungal sp. (strain NRRL 50135) GN=prlL PE=3 SV=1	MFS nicotinic acid transporter Tna1, putative	18162490	GO:0055085//transmembrane transport;	GO:0016021//integral component of membrane;	-	-
CCM_01427	28.3234	64.4535	1.18626	0.00753307	0.0906323	NW_006271969.1	-	-	-	-	-	hypothetical protein	18163458	-	-	-	-
CCM_01536	845.121	3040.65	1.84715	0.00756782	0.0908233	NW_006271969.1	-	-	sordNOG07101;opiNOG19112	S	-	hypothetical protein	18163567	-	-	-	-
CCM_07437	19.1191	63.0569	1.72164	0.00773642	0.0924876	NW_006271974.1	-	-	-	-	-	hypothetical protein	18169448	-	-	-	-
CCM_06159	852	3383.09	1.98941	0.00774494	0.0924876	NW_006271972.1	GO:0016021;GO:0055085	-	opiNOG11646;pleNOG00901	R	sp|B6HJU0|ROQT_PENRW Efflux pump roqT OS=Penicillium rubens (strain ATCC 28089 / DSM 1075 / NRRL 1951 / Wisconsin 54-1255) GN=roqT PE=1 SV=1	MFS transporter	18168174	GO:0055085//transmembrane transport;	GO:0016021//integral component of membrane;	-	-
CCM_01362	25.761	59.7458	1.21365	0.00780833	0.0930138	NW_006271969.1	GO:1902600;GO:0004129;GO:0005739	K18179	sordNOG15736;opiNOG41566	S	sp|G2TRP6|COA6_SCHPO Cytochrome c oxidase subunit 6B-like protein new16 OS=Schizosaccharomyces pombe (strain 972 / ATCC 24843) GN=new16 PE=2 SV=1	Cytochrome c oxidase, subunit VIb	18163393	GO:1902600//proton transmembrane transport;	GO:0005739//mitochondrion;	GO:0004129//cytochrome-c oxidase activity;	ko04714(Thermogenesis)
CCM_02032	81.9568	196.673	1.26286	0.00785461	0.0933304	NW_006271970.1	GO:0003676	-	sordNOG14668;opiNOG39293	S	-	hypothetical protein	18164061	-	-	GO:0003676//nucleic acid binding;	-
CCM_07345	63.152	138.131	1.12913	0.00786183	0.0933304	NW_006271974.1	GO:0005737;GO:0007020;GO:0005874;GO:0005815;GO:0043015;GO:0000922	-	sordNOG09171	S	-	gamma-tubulin complex component GCP4, putative	18169356	GO:0007020//microtubule nucleation;	GO:0005737//cytoplasm;GO:0005874//microtubule;GO:0005815//microtubule organizing center;GO:0000922//spindle pole;	GO:0043015//gamma-tubulin binding;	-
CCM_08572	108.71	233.96	1.10577	0.007864	0.0933304	NW_006271975.1	GO:0016021;GO:0000297;GO:0000329;GO:1903710;GO:1903711;GO:0005886;GO:0015606	-	sordNOG04984	R	sp|A0A161CLJ6|MRR1_MONRU Citrinin biosynthesis cluster MFS transporter mrr1 OS=Monascus ruber GN=mrr1 PE=3 SV=1	bicyclomycin resistance protein, putative	18170578	GO:1903710//spermine transmembrane transport;GO:1903711//spermidine transmembrane transport;	GO:0016021//integral component of membrane;GO:0000329//fungal-type vacuole membrane;GO:0005886//plasma membrane;	GO:0000297//spermine transmembrane transporter activity;GO:0015606//spermidine transmembrane transporter activity;	-
CCM_03524	61.2553	129.726	1.08257	0.00792338	0.0935737	NW_006271970.1	GO:0016021	-	opiNOG26484;sordNOG05411;sorNOG07960	S	-	ThiJ/PfpI	18165550	-	GO:0016021//integral component of membrane;	-	-
CCM_03630	407.031	873.033	1.1009	0.00805336	0.0943386	NW_006271971.1	GO:0000981;GO:0005634;GO:0008270;GO:0006357	-	opiNOG44565;hypNOG09154	S	-	C6 zinc finger domain protein	18165656	GO:0006357//regulation of transcription by RNA polymerase II;	GO:0005634//nucleus;	GO:0000981//DNA-binding transcription factor activity, RNA polymerase II-specific;GO:0008270//zinc ion binding;	-
CCM_07513	32.6868	112.44	1.78238	0.00805676	0.0943386	NW_006271974.1	-	-	COG2828;opiNOG21857	S	sp|Q0QLE6|MII_EUBBA 3-methylitaconate isomerase OS=Eubacterium barkeri GN=mii PE=1 SV=1	DUF453 domain protein	18169524	-	-	-	-
CCM_00334	23.1776	61.7472	1.41364	0.0080824	0.0944829	NW_006271969.1	GO:0004497;GO:0055114;GO:0016705;GO:0005506;GO:0020037	-	opiNOG55648;opiNOG06777	Q	sp|Q9C449|PAXP_PENPX Cytochrome P450 monooxygenase paxP OS=Penicillium paxilli GN=paxP PE=1 SV=1	cytochrome P450 monooxygenase, putative	18162369	GO:0055114//obsolete oxidation-reduction process;	-	GO:0004497//monooxygenase activity;GO:0016705//oxidoreductase activity, acting on paired donors, with incorporation or reduction of molecular oxygen;GO:0005506//iron ion binding;GO:0020037//heme binding;	-
CCM_04020	31.5111	70.2852	1.15736	0.008158	0.0948319	NW_006271971.1	GO:0051213;GO:0055114	-	sorNOG01420;NOG52517;opiNOG58813	SR	sp|P37479|YYCE_BACSU Uncharacterized protein YycE OS=Bacillus subtilis (strain 168) GN=yycE PE=1 SV=1	Glyoxalase/bleomycin resistance protein/dioxygenase	18166043	GO:0055114//obsolete oxidation-reduction process;	-	GO:0051213//dioxygenase activity;	-
CCM_08547	217.886	779.878	1.83967	0.0081769	0.0949368	NW_006271975.1	-	-	sordNOG09515	R	-	MYND domain protein	18170554	-	-	-	-
CCM_01999	371.129	838.932	1.17663	0.00821817	0.0953011	NW_006271970.1	GO:0016874;GO:0008152	K01908	opiNOG00481;COG0365;sordNOG08981	I	sp|P28812|Y3568_PSEAE Uncharacterized protein PA3568 OS=Pseudomonas aeruginosa (strain ATCC 15692 / DSM 22644 / CIP 104116 / JCM 14847 / LMG 12228 / 1C / PRS 101 / PAO1) GN=PA3568 PE=3 SV=2	acetate-CoA ligase	18164028	GO:0008152//metabolic process;	-	GO:0016874//ligase activity;	ko00640(Propanoate metabolism)
CCM_03001	4.87186	20.2091	2.05246	0.00844019	0.097309	NW_006271970.1	GO:0016021;GO:0055085	K08158	sordNOG08248;opiNOG00465	R	sp|O94528|CAF5_SCHPO Caffeine resistance protein 5 OS=Schizosaccharomyces pombe (strain 972 / ATCC 24843) GN=caf5 PE=3 SV=1	Major facilitator superfamily transporter	18165028	GO:0055085//transmembrane transport;	GO:0016021//integral component of membrane;	-	-
CCM_07210	580.059	1580.06	1.4457	0.00851724	0.0977097	NW_006271973.1	GO:0008270	K24684	opiNOG21386;sordNOG04306	R	-	zinc finger protein	18169221	-	-	GO:0008270//zinc ion binding;	-
CCM_03546	4.56397	32.4534	2.83001	0.00856431	0.098016	NW_006271970.1	GO:0000166	-	hypNOG14152	S	-	hypothetical protein	18165572	-	-	GO:0000166//nucleotide binding;	-
CCM_04016	855.467	1793.59	1.06806	0.00871095	0.0988804	NW_006271971.1	-	-	opiNOG59433;magNOG13033	S	-	hypothetical protein	18166039	-	-	-	-
CCM_08663	38.7668	80.4111	1.05257	0.00872127	0.0988804	NW_006271975.1	GO:0008080	-	opiNOG34845;COG0454	RK	-	Acyl-CoA N-acyltransferase	18170669	-	-	GO:0008080//N-acetyltransferase activity;	-
CCM_04118	2.60634	16.9651	2.70247	0.00873332	0.098892	NW_006271971.1	-	-	-	-	-	hypothetical protein	18166141	-	-	-	-
CCM_01491	477.475	998.399	1.06419	0.00895678	0.100829	NW_006271969.1	-	-	opiNOG67058;opiNOG45053;sordNOG14486	SR	-	hypothetical protein	18163522	-	-	-	-
CCM_05679	319.204	775.025	1.27977	0.00913835	0.101802	NW_006271972.1	GO:0003677;GO:0006357;GO:0008270;GO:0005634;GO:0000981	-	opiNOG06841	S	sp|B8NJG9|LEPE_ASPFN Transcription factor lepE OS=Aspergillus flavus (strain ATCC 200026 / FGSC A1120 / NRRL 3357 / JCM 12722 / SRRC 167) GN=lepB PE=3 SV=1	C6 zinc finger domain-containing protein	18167697	GO:0006357//regulation of transcription by RNA polymerase II;	GO:0005634//nucleus;	GO:0003677//DNA binding;GO:0008270//zinc ion binding;GO:0000981//DNA-binding transcription factor activity, RNA polymerase II-specific;	-
CCM_06078	37.7528	78.8621	1.06275	0.00918325	0.102184	NW_006271972.1	GO:0055114;GO:0051213	-	-	-	-	Glyoxalase/bleomycin resistance protein/dioxygenase	18168093	GO:0055114//obsolete oxidation-reduction process;	-	GO:0051213//dioxygenase activity;	-
CCM_07343	752.239	1523.16	1.0178	0.00921652	0.102317	NW_006271974.1	GO:0006508;GO:0004190	-	opiNOG01174;sordNOG05838	O	sp|P11838|CARP_CRYPA Endothiapepsin OS=Cryphonectria parasitica GN=EAPA PE=1 SV=2	endothiapepsin precursor	18169354	GO:0006508//proteolysis;	-	GO:0004190//aspartic-type endopeptidase activity;	-
CCM_01560	20.2594	49.812	1.2979	0.00941039	0.103751	NW_006271969.1	GO:0071949;GO:0055114;GO:0004497	-	opiNOG71163;COG0654;opiNOG24211;opiNOG02763	HSC	sp|A0A0U1LQD9|CCTM_TALIS FAD-dependent monooxygenase cctM OS=Talaromyces islandicus GN=cctM PE=3 SV=1	FAD-dependent monooxygenase	18163591	GO:0055114//obsolete oxidation-reduction process;	-	GO:0071949//FAD binding;GO:0004497//monooxygenase activity;	-
CCM_05199	313.915	765.013	1.28511	0.00953051	0.104716	NW_006271972.1	GO:0003735;GO:0005763;GO:0006412;GO:0003723	K02988	sordNOG07324	J	sp|P33759|RT05_YEAST 37S ribosomal protein S5, mitochondrial OS=Saccharomyces cerevisiae (strain ATCC 204508 / S288c) GN=MRPS5 PE=1 SV=1	37S ribosomal protein S5	18167218	GO:0006412//translation;	GO:0005763//mitochondrial small ribosomal subunit;	GO:0003735//structural constituent of ribosome;GO:0003723//RNA binding;	ko03010(Ribosome)
CCM_08388	15.9794	77.0871	2.27028	0.00964924	0.105779	NW_006271975.1	-	-	-	-	-	hypothetical protein	18170396	-	-	-	-
CCM_02595	1.96262	12.9989	2.72754	0.00998046	0.108884	NW_006271970.1	-	-	-	-	-	hypothetical protein	18164622	-	-	-	-
CCM_08034	30.9043	203.625	2.72003	0.0100596	0.109159	NW_006271974.1	GO:0016491;GO:0055114;GO:0046872;GO:0020037	K00326	opiNOG00335;sordNOG06629	CH	sp|B0CQN7|NCB5R_LACBS NADH-cytochrome b5 reductase 1 OS=Laccaria bicolor (strain S238N-H82 / ATCC MYA-4686) GN=MCR1.1 PE=3 SV=1	cytochrome b5 reductase, putative	18170043	GO:0055114//obsolete oxidation-reduction process;	-	GO:0016491//oxidoreductase activity;GO:0046872//metal ion binding;GO:0020037//heme binding;	ko00520(Amino sugar and nucleotide sugar metabolism)
CCM_03596	641.662	1589.72	1.30889	0.0101063	0.109296	NW_006271970.1	GO:0008237;GO:0006508	-	euNOG02355;sorNOG03848;opiNOG11422;opiNOG10620	WO	sp|A4RGT4|MEP1_MAGO7 Extracellular metalloprotease MGG_08041 OS=Magnaporthe oryzae (strain 70-15 / ATCC MYA-4617 / FGSC 8958) GN=MGG_08041 PE=3 SV=1	metalloprotease 1	18165622	GO:0006508//proteolysis;	-	GO:0008237//metallopeptidase activity;	-
CCM_07155	37.4309	78.6765	1.0717	0.0102006	0.110068	NW_006271973.1	-	-	sordNOG13973;opiNOG39638;hypNOG12990	S	-	hypothetical protein	18169166	-	-	-	-
CCM_09412	286.952	634.28	1.14431	0.0103445	0.110995	NW_006271977.1	-	K17439	sordNOG04187	R	sp|Q06678|RM35_YEAST 54S ribosomal protein L35, mitochondrial OS=Saccharomyces cerevisiae (strain ATCC 204508 / S288c) GN=MRPL35 PE=1 SV=1	mitochondrial large ribosomal subunit YmL35, putative	18171415	-	-	-	-
CCM_05879	109.924	242.703	1.14269	0.0103557	0.110995	NW_006271972.1	-	K17362	sordNOG14231	S	sp|Q9NPJ3|ACO13_HUMAN Acyl-coenzyme A thioesterase 13 OS=Homo sapiens GN=ACOT13 PE=1 SV=1	Thioesterase superfamily	18167897	-	-	-	-
CCM_02410	24.4421	55.3272	1.17862	0.0103959	0.111302	NW_006271970.1	-	-	-	-	-	hypothetical protein	18164437	-	-	-	-
CCM_03123	284.139	605.768	1.09217	0.0104508	0.111605	NW_006271970.1	GO:0006629;GO:0016021;GO:0030729	K01907	opiNOG17052;opiNOG05394;sordNOG10305	I	sp|Q5ZLG0|AACS_CHICK Acetoacetyl-CoA synthetase OS=Gallus gallus GN=AACS PE=2 SV=1	acetoacetyl-CoA synthase	18165150	GO:0006629//lipid metabolic process;	GO:0016021//integral component of membrane;	GO:0030729//acetoacetate-CoA ligase activity;	ko00650(Butanoate metabolism);ko00280(Valine, leucine and isoleucine degradation)
CCM_08469	142.954	305.471	1.09549	0.0104679	0.111605	NW_006271975.1	-	-	sordNOG09624;sordNOG05067	SQ	sp|E9F8M1|SWNN_METRA Oxidoreductase swnN OS=Metarhizium robertsii (strain ARSEF 23 / ATCC MYA-3075) GN=swnN PE=3 SV=1	NAD(P)-binding domain	18170476	-	-	-	-
CCM_07226	1168.62	3037.38	1.37802	0.010843	0.114184	NW_006271973.1	GO:0016787	K17497	opiNOG48876	R	-	HAD family hydrolase	18169237	-	-	GO:0016787//hydrolase activity;	ko00520(Amino sugar and nucleotide sugar metabolism);ko00051(Fructose and mannose metabolism)
CCM_04119	30.312	599.782	4.30648	0.010941	0.114964	NW_006271971.1	-	-	-	-	-	Terpenoid synthase	18166142	-	-	-	-
CCM_08719	29.1912	97.5396	1.74045	0.0111298	0.11581	NW_006271975.1	-	-	sordNOG13774;ascNOG15422;opiNOG61903	S	-	hypothetical protein	18170725	-	-	-	-
CCM_00567	13.6934	36.6516	1.42039	0.0111727	0.116016	NW_006271969.1	-	-	-	-	-	hypothetical protein	18162602	-	-	-	-
CCM_07970	17.942	44.7255	1.31776	0.0112581	0.116515	NW_006271974.1	GO:0015297;GO:0016021;GO:0015103;GO:0015698;GO:0055085	K03325	sordNOG05299;sorNOG07089;opiNOG07175	PS	sp|Q8NQC8|ACR3_CORGL Arsenical-resistance protein Acr3 OS=Corynebacterium glutamicum (strain ATCC 13032 / DSM 20300 / JCM 1318 / LMG 3730 / NCIMB 10025) GN=acr3 PE=1 SV=2	arsenical-resistance protein	18169980	GO:0015698//inorganic anion transport;GO:0055085//transmembrane transport;	GO:0016021//integral component of membrane;	GO:0015297//antiporter activity;GO:0015103//inorganic anion transmembrane transporter activity;	-
CCM_02598	151.764	890.869	2.55338	0.0113133	0.116961	NW_006271970.1	GO:0008270;GO:0016491;GO:0055114	-	eurotNOG05243;NOG127938;opiNOG06785;KOG1198	RQC	sp|P54006|TOXD_COCCA Protein TOXD OS=Cochliobolus carbonum GN=TOXD PE=3 SV=1	ToxD-like zinc binding oxidoreductase, putative	18164625	GO:0055114//obsolete oxidation-reduction process;	-	GO:0008270//zinc ion binding;GO:0016491//oxidoreductase activity;	-
CCM_01496	60.639	161.425	1.41254	0.011383	0.117429	NW_006271969.1	GO:0015171;GO:0016021;GO:0003333	K19564	onyNOG06443;COG0531;opiNOG50162	E	sp|P19807|HNM1_YEAST Choline transport protein OS=Saccharomyces cerevisiae (strain ATCC 204508 / S288c) GN=HNM1 PE=1 SV=1	GABA permease, putative	18163527	GO:0003333//amino acid transmembrane transport;	GO:0016021//integral component of membrane;	GO:0015171//amino acid transmembrane transporter activity;	-
CCM_05076	3507.78	9640.95	1.45862	0.0115415	0.11881	NW_006271972.1	-	-	sordNOG05193;hypNOG07968;sordNOG10327	S	-	hypothetical protein	18167096	-	-	-	-
CCM_02674	88.8246	331.294	1.89908	0.0115676	0.118951	NW_006271970.1	GO:0055114;GO:0016491	-	sordNOG11171;sorNOG02601;opiNOG20662	Q	sp|Q9RPT1|RHLG_PSEAE Rhamnolipids biosynthesis 3-oxoacyl-[acyl-carrier-protein] reductase OS=Pseudomonas aeruginosa (strain ATCC 15692 / DSM 22644 / CIP 104116 / JCM 14847 / LMG 12228 / 1C / PRS 101 / PAO1) GN=rhlG PE=1 SV=1	short chain dehydrogenase/reductase family	18164701	GO:0055114//obsolete oxidation-reduction process;	-	GO:0016491//oxidoreductase activity;	-
CCM_05274	1.29344	10.7658	3.05718	0.0116003	0.119159	NW_006271972.1	GO:0004602;GO:0004364;GO:0005783;GO:0098869	K00799	sordNOG05240;opiNOG28838	O	sp|Q9P6M1|GST3_SCHPO Glutathione S-transferase 3 OS=Schizosaccharomyces pombe (strain 972 / ATCC 24843) GN=gst3 PE=1 SV=3	glutathione S-transferase, putative	18167293	GO:0098869//cellular oxidant detoxification;	GO:0005783//endoplasmic reticulum;	GO:0004602//glutathione peroxidase activity;GO:0004364//glutathione transferase activity;	ko05418(Fluid shear stress and atherosclerosis);ko05225(Hepatocellular carcinoma);ko05208(Chemical carcinogenesis - reactive oxygen species);ko05207(Chemical carcinogenesis - receptor activation);ko05204(Chemical carcinogenesis - DNA adducts);ko05200(Pathways in cancer);ko04212(Longevity regulating pathway - worm);ko01524(Platinum drug resistance);ko00983(Drug metabolism - other enzymes);ko00982(…
CCM_02675	740.583	2739.49	1.88717	0.0118172	0.120744	NW_006271970.1	-	-	sordNOG15059;sorNOG05991	S	-	hypothetical protein	18164702	-	-	-	-
CCM_05574	186.365	383.837	1.04236	0.0119246	0.121288	NW_006271972.1	GO:0005840	K17408	opiNOG07712;hypNOG08665;necNOG05812	JS	-	mitochondrial ribosomal protein DAP3, putative	18167592	-	GO:0005840//ribosome;	-	-
CCM_09247	4.23562	17.8704	2.07692	0.0121227	0.122435	NW_006271976.1	-	-	sordNOG07393;opiNOG25024	R	-	hypothetical protein	18171250	-	-	-	-
CCM_05222	391.273	1805.97	2.20652	0.0122225	0.122983	NW_006271972.1	GO:0033961	K01253	opiNOG18671;COG0596;sordNOG11700	R	sp|Q06816|HYEP_STIAD Putative epoxide hydrolase OS=Stigmatella aurantiaca (strain DW4/3-1) GN=STAUR_4299 PE=3 SV=2	epoxide hydrolase	18167241	-	-	GO:0033961//cis-stilbene-oxide hydrolase activity;	ko05208(Chemical carcinogenesis - reactive oxygen species);ko05207(Chemical carcinogenesis - receptor activation);ko05204(Chemical carcinogenesis - DNA adducts);ko04976(Bile secretion);ko00980(Metabolism of xenobiotics by cytochrome P450)
CCM_02035	33.2592	234.529	2.81794	0.0122409	0.122983	NW_006271970.1	-	-	hypNOG00420;sordNOG12356;necNOG07362	S	-	hypothetical protein	18164064	-	-	-	-
CCM_06830	292.586	689.231	1.23612	0.0122536	0.122983	NW_006271973.1	-	-	sordNOG12406;opiNOG28887	S	-	HMG box protein	18168841	-	-	-	-
CCM_06199	232.83	474.197	1.02621	0.0122747	0.123067	NW_006271972.1	GO:0007166;GO:0000494;GO:0010521;GO:0016021;GO:0003676;GO:0008047;GO:0005730;GO:0043085;GO:0032211;GO:0005654;GO:0051974;GO:0004888	K11135	opiNOG32533;sordNOG12551	A	sp|A4R0T9|PXR1_MAGO7 Protein PXR1 OS=Magnaporthe oryzae (strain 70-15 / ATCC MYA-4617 / FGSC 8958) GN=PXR1 PE=3 SV=1	G-patch RNA maturation protein	18168214	GO:0007166//cell surface receptor signaling pathway;GO:0000494//box C/D RNA 3'-end processing;GO:0043085//positive regulation of catalytic activity;GO:0032211//negative regulation of telomere maintenance via telomerase;GO:0051974//negative regulation of telomerase activity;	GO:0016021//integral component of membrane;GO:0005730//nucleolus;GO:0005654//nucleoplasm;	GO:0010521//telomerase inhibitor activity;GO:0003676//nucleic acid binding;GO:0008047//enzyme activator activity;GO:0004888//transmembrane signaling receptor activity;	-
CCM_07248	103.244	410.13	1.99002	0.0124338	0.124163	NW_006271973.1	GO:0006470;GO:0005635;GO:0004722;GO:0005739	K17508	sordNOG05096	T	sp|Q6NVE9|PPTC7_MOUSE Protein phosphatase PTC7 homolog OS=Mus musculus GN=Pptc7 PE=1 SV=1	5-azacytidine resistance protein azr1	18169259	GO:0006470//protein dephosphorylation;	GO:0005635//nuclear envelope;GO:0005739//mitochondrion;	GO:0004722//protein serine/threonine phosphatase activity;	-
CCM_00381	138.819	307.088	1.14544	0.0127501	0.126646	NW_006271969.1	GO:0016021	-	opiNOG28388;sordNOG12951	S	-	hypothetical protein	18162416	-	GO:0016021//integral component of membrane;	-	-
CCM_08249	465.632	4131.33	3.14935	0.0129339	0.12742	NW_006271975.1	GO:0016021;GO:0055085	-	opiNOG48722	G	sp|Q5ATG7|APDF_EMENI Aspyridones efflux protein apdF OS=Emericella nidulans (strain FGSC A4 / ATCC 38163 / CBS 112.46 / NRRL 194 / M139) GN=apdF PE=2 SV=1	monocarboxylate permease, putative	18170257	GO:0055085//transmembrane transport;	GO:0016021//integral component of membrane;	-	-
CCM_02777	294.879	838.084	1.50697	0.0129621	0.12742	NW_006271970.1	GO:0047555;GO:1902660;GO:0004115;GO:2000480;GO:0030818;GO:0043949;GO:0060238;GO:0006995;GO:0006198;GO:0051447;GO:0005634;GO:0005829	-	sordNOG08770;opiNOG04731	RS	sp|P36599|PDE1_SCHPO 3&apos;,5&apos;-cyclic-nucleotide phosphodiesterase OS=Schizosaccharomyces pombe (strain 972 / ATCC 24843) GN=cgs2 PE=3 SV=1	Cyclic-AMP phosphodiesterase, class-II	18164804	GO:1902660//negative regulation of glucose mediated signaling pathway;GO:2000480//negative regulation of cAMP-dependent protein kinase activity;GO:0030818//obsolete negative regulation of cAMP biosynthetic process;GO:0043949//regulation of cAMP-mediated signaling;GO:0060238//regulation of signal transduction involved in conjugation with cellular fusion;GO:0006995//cellular response to nitrogen st…	GO:0005634//nucleus;GO:0005829//cytosol;	GO:0047555//3',5'-cyclic-GMP phosphodiesterase activity;GO:0004115//3',5'-cyclic-AMP phosphodiesterase activity;	-
CCM_05590	1989.32	4697.34	1.23957	0.0129712	0.12742	NW_006271972.1	-	-	hypNOG03410;opiNOG36644;sordNOG14036	S	-	hypothetical protein	18167608	-	-	-	-
CCM_05759	1624.18	4616.04	1.50694	0.0129904	0.127454	NW_006271972.1	GO:0016021	-	opiNOG08600;sordNOG12974	S	-	hypothetical protein	18167777	-	GO:0016021//integral component of membrane;	-	-
CCM_07305	7.8325	25.0926	1.67972	0.0130474	0.12787	NW_006271974.1	-	-	-	-	-	hypothetical protein	18169316	-	-	-	-
CCM_00029	630.506	1604.86	1.34787	0.0130962	0.12787	NW_006271969.1	GO:0015035;GO:0055114;GO:0005623;GO:0006662;GO:0045454	K03671	sordNOG13998;sorNOG05728	O	sp|O14463|TRX1_SCHPO Thioredoxin-1 OS=Schizosaccharomyces pombe (strain 972 / ATCC 24843) GN=trx1 PE=3 SV=3	cytoplasmic thioredoxin, putative	18162064	GO:0055114//obsolete oxidation-reduction process;GO:0006662//glycerol ether metabolic process;GO:0045454//cell redox homeostasis;	GO:0005623//obsolete cell;	GO:0015035//protein-disulfide reductase activity;	ko05418(Fluid shear stress and atherosclerosis);ko05132(Salmonella infection);ko05012(Parkinson disease);ko04621(NOD-like receptor signaling pathway)
CCM_04622	218.163	1429.84	2.71237	0.0131181	0.12787	NW_006271971.1	GO:0006044;GO:0008448	K01443	sordNOG07163;opiNOG07108	G	sp|Q8JZV7|NAGA_MOUSE N-acetylglucosamine-6-phosphate deacetylase OS=Mus musculus GN=Amdhd2 PE=1 SV=1	n-acetylglucosamine-6-phosphate deacetylase	18166644	GO:0006044//N-acetylglucosamine metabolic process;	-	GO:0008448//N-acetylglucosamine-6-phosphate deacetylase activity;	ko00520(Amino sugar and nucleotide sugar metabolism)
CCM_01765	153.448	584.765	1.93011	0.0134176	0.12992	NW_006271969.1	GO:0004497;GO:0055114;GO:0071949	-	opiNOG46730;necNOG09789;sorNOG06360	S	sp|A8LVF4|KMO_SALAI Kynurenine 3-monooxygenase OS=Salinispora arenicola (strain CNS-205) GN=kmo PE=3 SV=1	monooxygenase, putative	18163795	GO:0055114//obsolete oxidation-reduction process;	-	GO:0004497//monooxygenase activity;GO:0071949//FAD binding;	-
CCM_01736	497.997	1107.1	1.15257	0.0134307	0.12992	NW_006271969.1	GO:0016021;GO:0006810;GO:0005215	K03441	sordNOG09128;opiNOG18827	G	sp|P43549|YFF4_YEAST Uncharacterized membrane protein YFL054C OS=Saccharomyces cerevisiae (strain ATCC 204508 / S288c) GN=YFL054C PE=1 SV=1	aquaglyceroporin, putative	18163766	GO:0006810//transport;	GO:0016021//integral component of membrane;	GO:0005215//transporter activity;	-
CCM_04850	19.7888	46.3009	1.22635	0.0134518	0.129993	NW_006271971.1	GO:0016021	-	-	-	-	hypothetical protein	18166871	-	GO:0016021//integral component of membrane;	-	-
CCM_08561	117.628	388.468	1.72357	0.0136275	0.131117	NW_006271975.1	GO:0005524;GO:0007049;GO:0006468;GO:0004674	-	opiNOG00568;NOG14127	TD	sp|O59790|ARK1_SCHPO Serine/threonine-protein kinase ark1 OS=Schizosaccharomyces pombe (strain 972 / ATCC 24843) GN=ark1 PE=1 SV=2	serine/threonine protein kinase, putative	18170567	GO:0007049//cell cycle;GO:0006468//protein phosphorylation;	-	GO:0005524//ATP binding;GO:0004674//protein serine/threonine kinase activity;	-
CCM_00942	58.9059	177.548	1.59173	0.0136361	0.131117	NW_006271969.1	GO:0008080	-	opiNOG32723	R	-	Acyl-CoA N-acyltransferase	18162975	-	-	GO:0008080//N-acetyltransferase activity;	-
CCM_04123	4.55798	18.1024	1.98972	0.0141279	0.133954	NW_006271971.1	-	-	-	-	-	hypothetical protein	18166146	-	-	-	-
CCM_07859	907.278	1869.22	1.04282	0.0143002	0.134808	NW_006271974.1	GO:0050085;GO:0055114	K17742	opiNOG12282;COG1028	IQ	sp|Q8NK50|MTDH_HYPJE NADP-dependent mannitol dehydrogenase OS=Hypocrea jecorina GN=lxr1 PE=1 SV=1	L-xylulose reductase	18169869	GO:0055114//obsolete oxidation-reduction process;	-	GO:0050085//mannitol 2-dehydrogenase (NADP+) activity;	ko00051(Fructose and mannose metabolism)
CCM_08550	94.1477	253.693	1.43009	0.0143616	0.135122	NW_006271975.1	GO:0055114;GO:0008137;GO:0009055;GO:0016020	K18160	opiNOG34481;sordNOG13477	S	sp|Q6C7L6|N7BML_YARLI NADH-ubiquinone oxidoreductase assembly factor N7BML OS=Yarrowia lipolytica (strain CLIB 122 / E 150) GN=N7BML PE=1 SV=1	hypothetical protein	18170557	GO:0055114//obsolete oxidation-reduction process;	GO:0016020//membrane;	GO:0008137//NADH dehydrogenase (ubiquinone) activity;GO:0009055//electron transfer activity;	ko04714(Thermogenesis)
CCM_00888	22.4621	50.5373	1.16986	0.0144107	0.13532	NW_006271969.1	-	-	opiNOG60557;opiNOG36464	S	-	cupin domain protein	18162922	-	-	-	-
CCM_03763	11.7607	32.188	1.45255	0.0150216	0.139753	NW_006271971.1	-	-	-	-	-	hypothetical protein	18165786	-	-	-	-
CCM_04700	931.415	1878.17	1.01183	0.0152854	0.140787	NW_006271971.1	GO:0005794;GO:0016787;GO:0005783	K13535	opiNOG01563;sordNOG05945	IR	sp|O14249|CLD1_SCHPO probable cardiolipin-specific deacylase, mitochondrial OS=Schizosaccharomyces pombe (strain 972 / ATCC 24843) GN=SPAC6G10.03c PE=3 SV=1	alpha/beta hydrolase, putative	18166722	-	GO:0005794//Golgi apparatus;GO:0005783//endoplasmic reticulum;	GO:0016787//hydrolase activity;	ko00564(Glycerophospholipid metabolism)
CCM_09082	50.6807	107.245	1.0814	0.0153281	0.141045	NW_006271975.1	GO:0016491;GO:0008270;GO:0055114	-	sordNOG04386	Q	sp|Q9P6I8|YHG1_SCHPO Zinc-type alcohol dehydrogenase-like protein C1198.01 OS=Schizosaccharomyces pombe (strain 972 / ATCC 24843) GN=SPBC1198.01 PE=3 SV=1	S-(hydroxymethyl)glutathione dehydrogenase	18171085	GO:0055114//obsolete oxidation-reduction process;	-	GO:0016491//oxidoreductase activity;GO:0008270//zinc ion binding;	-
CCM_09152	215.098	551.703	1.3589	0.0155482	0.142406	NW_006271976.1	GO:0005524;GO:0006468;GO:0004674	K08286	sordNOG06122	T	sp|P28708|PRR1_YEAST Serine/threonine-protein kinase PRR1 OS=Saccharomyces cerevisiae (strain ATCC 204508 / S288c) GN=PRR1 PE=1 SV=1	protein kinase, putative	18171155	GO:0006468//protein phosphorylation;	-	GO:0005524//ATP binding;GO:0004674//protein serine/threonine kinase activity;	-
CCM_04493	23.8363	89.4158	1.90737	0.0155825	0.142406	NW_006271971.1	GO:0016740	K17803	sordNOG06966;opiNOG27896	RS	sp|Q06668|OMS1_YEAST Methyltransferase OMS1, mitochondrial OS=Saccharomyces cerevisiae (strain ATCC 204508 / S288c) GN=OMS1 PE=1 SV=1	ubiquinone/menaquinone biosynthesis-related protein	18166516	-	-	GO:0016740//transferase activity;	-
CCM_09391	770.283	1664.93	1.11201	0.0156927	0.142525	NW_006271977.1	-	-	-	-	-	hypothetical protein	18171394	-	-	-	-
CCM_00583	52.8065	191.028	1.85499	0.0158377	0.143269	NW_006271969.1	GO:0055114;GO:0016491;GO:0016020;GO:0071949	K00480	opiNOG00334	C	sp|Q3S4B7|3HBH_POLNA 3-hydroxybenzoate 6-hydroxylase OS=Polaromonas naphthalenivorans (strain CJ2) GN=nagX PE=1 SV=1	FAD dependent oxidoreductase	18162618	GO:0055114//obsolete oxidation-reduction process;	GO:0016020//membrane;	GO:0016491//oxidoreductase activity;GO:0071949//FAD binding;	ko00626(Naphthalene degradation);ko00624(Polycyclic aromatic hydrocarbon degradation);ko00621(Dioxin degradation)
CCM_02919	8.11144	25.0013	1.62397	0.0159901	0.144512	NW_006271970.1	GO:0008080	-	pleNOG08496;opiNOG44158;opiNOG45217	R	-	acetyltransferase, GNAT family	18164946	-	-	GO:0008080//N-acetyltransferase activity;	-
CCM_00943	12.0362	54.5566	2.18038	0.0163344	0.145843	NW_006271969.1	-	-	-	-	-	hypothetical protein	18162976	-	-	-	-
CCM_03166	178.33	419.667	1.2347	0.0165408	0.146868	NW_006271970.1	GO:0016021	-	opiNOG31147;opiNOG58029	S	-	hypothetical protein	18165193	-	GO:0016021//integral component of membrane;	-	-
CCM_05583	447.478	1821.47	2.02521	0.0166254	0.147212	NW_006271972.1	GO:0016021	-	sordNOG12181;opiNOG25398;opiNOG33084	S	-	hypothetical protein	18167601	-	GO:0016021//integral component of membrane;	-	-
CCM_06210	40.935	86.3685	1.07717	0.0168363	0.148943	NW_006271972.1	GO:0016021;GO:0055085	-	opiNOG03553;sordNOG10482	R	sp|A0A0B5EMG9|FUB11_FUSOX Efflux pump FUBT OS=Fusarium oxysporum GN=FUBT PE=1 SV=1	MFS multidrug transporter, putative	18168225	GO:0055085//transmembrane transport;	GO:0016021//integral component of membrane;	-	-
CCM_05743	11.7033	32.6258	1.47909	0.0168906	0.149286	NW_006271972.1	GO:0055114;GO:0016491	-	opiNOG24256	R	sp|P9WJJ0|Y1812_MYCTO NADH dehydrogenase-like protein MT1860 OS=Mycobacterium tuberculosis (strain CDC 1551 / Oshkosh) GN=MT1860 PE=2 SV=1	NADH dehydrogenase, FAD-containing subunit	18167761	GO:0055114//obsolete oxidation-reduction process;	-	GO:0016491//oxidoreductase activity;	-
CCM_03042	1462.88	3365.07	1.20183	0.0169156	0.14937	NW_006271970.1	GO:0031314;GO:0009408;GO:0000002;GO:0006515;GO:0032781;GO:0042026;GO:0051082;GO:0031072;GO:0005524;GO:0001671;GO:0005759;GO:0046872;GO:0006458	K03686	opiNOG16081;sordNOG07576	O	sp|C8V213|MDJ1_EMENI DnaJ homolog 1, mitochondrial OS=Emericella nidulans (strain FGSC A4 / ATCC 38163 / CBS 112.46 / NRRL 194 / M139) GN=AN10778 PE=3 SV=1	mitochondrial DnaJ chaperone (Mdj1), putative	18165069	GO:0009408//response to heat;GO:0000002//mitochondrial genome maintenance;GO:0006515//protein quality control for misfolded or incompletely synthesized proteins;GO:0032781//positive regulation of ATP-dependent activity;GO:0042026//protein refolding;GO:0006458//'de novo' protein folding;	GO:0031314//extrinsic component of mitochondrial inner membrane;GO:0005759//mitochondrial matrix;	GO:0051082//unfolded protein binding;GO:0031072//heat shock protein binding;GO:0005524//ATP binding;GO:0001671//ATPase activator activity;GO:0046872//metal ion binding;	-
CCM_00560	1182	3178.96	1.42732	0.0172391	0.151005	NW_006271969.1	GO:0003700;GO:0006355;GO:0043565;GO:0008270	-	sordNOG06620;opiNOG39089;sorNOG04027	SK	sp|Q55C49|GTAG_DICDI GATA zinc finger domain-containing protein 7 OS=Dictyostelium discoideum GN=gtaG PE=4 SV=1	sexual development transcription factor NsdD	18162595	GO:0006355//regulation of transcription, DNA-templated;	-	GO:0003700//DNA-binding transcription factor activity;GO:0043565//sequence-specific DNA binding;GO:0008270//zinc ion binding;	-
CCM_02574	20.1861	70.2449	1.79903	0.0174292	0.151953	NW_006271970.1	-	-	opiNOG46699;sordNOG15108	S	-	hypothetical protein	18164601	-	-	-	-
CCM_01576	22.7395	57.6629	1.34244	0.0175492	0.152584	NW_006271969.1	-	-	sordNOG14074;NOG102036;opiNOG41495;necNOG12984	S	-	hypothetical protein	18163607	-	-	-	-
CCM_04263	154.3	397.975	1.36694	0.0176667	0.153053	NW_006271971.1	GO:0003700;GO:0006355;GO:0043565	-	sordNOG14161;opiNOG41579	KS	sp|A2R346|KAPC_ASPNC Putative transcription factor kapC OS=Aspergillus niger (strain CBS 513.88 / FGSC A1513) GN=kapC PE=3 SV=2	bZIP transcription factor	18166286	GO:0006355//regulation of transcription, DNA-templated;	-	GO:0003700//DNA-binding transcription factor activity;GO:0043565//sequence-specific DNA binding;	-
CCM_00242	0.654206	7.95391	3.60385	0.0177899	0.153843	NW_006271969.1	-	-	-	-	-	hypothetical protein	18162277	-	-	-	-
CCM_05015	543.335	1092.18	1.0073	0.0184885	0.15832	NW_006271971.1	GO:0004222;GO:0017087;GO:0006627;GO:0046872	K01412	sordNOG08855	O	sp|P23955|MPPA_NEUCR Mitochondrial-processing peptidase subunit alpha OS=Neurospora crassa (strain ATCC 24698 / 74-OR23-1A / CBS 708.71 / DSM 1257 / FGSC 987) GN=mpp PE=1 SV=2	mitochondrial processing peptidase alpha subunit	18167035	GO:0006627//protein processing involved in protein targeting to mitochondrion;	GO:0017087//mitochondrial processing peptidase complex;	GO:0004222//metalloendopeptidase activity;GO:0046872//metal ion binding;	-
CCM_09411	254.397	511.826	1.00857	0.01861	0.158974	NW_006271977.1	GO:0005762;GO:0006412;GO:0003735	K02926	sordNOG06851;opiNOG02936	J	sp|O74801|RL4P_SCHPO 54S ribosomal protein yml6, mitochondrial OS=Schizosaccharomyces pombe (strain 972 / ATCC 24843) GN=yml6 PE=3 SV=1	60S ribosomal protein L4	18171414	GO:0006412//translation;	GO:0005762//mitochondrial large ribosomal subunit;	GO:0003735//structural constituent of ribosome;	ko03010(Ribosome)
CCM_00537	127.782	439.296	1.78151	0.0190707	0.162009	NW_006271969.1	GO:0016787	-	sordNOG06635;opiNOG03748	RS	sp|Q9HB07|MYG1_HUMAN UPF0160 protein MYG1, mitochondrial OS=Homo sapiens GN=C12orf10 PE=1 SV=2	MYG1 protein	18162572	-	-	GO:0016787//hydrolase activity;	-
CCM_01120	3575.07	9138.5	1.35399	0.019313	0.163486	NW_006271969.1	GO:0016021;GO:0022857;GO:0055085	-	sordNOG04731	P	sp|Q8GSD9|PHT12_ORYSJ Inorganic phosphate transporter 1-2 OS=Oryza sativa subsp. japonica GN=PTH1-2 PE=2 SV=1	MFS phosphate transporter	18163152	GO:0055085//transmembrane transport;	GO:0016021//integral component of membrane;	GO:0022857//transmembrane transporter activity;	-
CCM_04655	461.117	3219.96	2.80384	0.0195953	0.165204	NW_006271971.1	GO:0015171;GO:0016021;GO:0003333	-	opiNOG01538;sorNOG06536;COG0531	E	sp|P50276|MUP1_YEAST High-affinity methionine permease OS=Saccharomyces cerevisiae (strain ATCC 204508 / S288c) GN=MUP1 PE=1 SV=1	high affinity methionine permease	18166677	GO:0003333//amino acid transmembrane transport;	GO:0016021//integral component of membrane;	GO:0015171//amino acid transmembrane transporter activity;	-
CCM_07945	203.788	531.447	1.38286	0.0196089	0.165204	NW_006271974.1	GO:0030061;GO:0005216;GO:0097002;GO:0033615;GO:0034220;GO:0032977;GO:0000002;GO:0016021;GO:0097177;GO:0045039;GO:0032979	K03217	COG0706;opiNOG02980;sordNOG15641	OU	sp|P39952|OXA1_YEAST Mitochondrial inner membrane protein OXA1 OS=Saccharomyces cerevisiae (strain ATCC 204508 / S288c) GN=OXA1 PE=1 SV=1	mitochondrial export translocase Oxa1, putative	18169955	GO:0033615//mitochondrial proton-transporting ATP synthase complex assembly;GO:0034220//ion transmembrane transport;GO:0000002//mitochondrial genome maintenance;GO:0045039//protein insertion into mitochondrial inner membrane;GO:0032979//protein insertion into mitochondrial inner membrane from matrix;	GO:0030061//mitochondrial crista;GO:0097002//mitochondrial inner boundary membrane;GO:0016021//integral component of membrane;	GO:0005216//ion channel activity;GO:0032977//membrane insertase activity;GO:0097177//mitochondrial ribosome binding;	ko03070(Bacterial secretion system);ko03060(Protein export);ko02024(Quorum sensing)
CCM_06731	116.083	1304.18	3.48991	0.0197626	0.165928	NW_006271973.1	-	-	opiNOG55198;sordNOG13094;opiNOG64258;opiNOG64081	KS	-	bZIP transcription factor	18168745	-	-	-	-
CCM_02326	2.91623	13.6864	2.23057	0.0200023	0.16643	NW_006271970.1	-	-	-	-	-	hypothetical protein	18164353	-	-	-	-
CCM_01085	54.7257	198.874	1.86157	0.0202727	0.167922	NW_006271969.1	-	-	sordNOG15091	S	-	hypothetical protein	18163118	-	-	-	-
CCM_06253	21.4845	46.7684	1.12224	0.020365	0.167999	NW_006271972.1	GO:0016021	-	-	-	-	hypothetical protein	18168268	-	GO:0016021//integral component of membrane;	-	-
CCM_06872	7.49716	27.7339	1.88724	0.0205012	0.168797	NW_006271973.1	-	-	-	-	-	hypothetical protein	18168883	-	-	-	-
CCM_08877	7.16432	22.5863	1.65655	0.0205224	0.168827	NW_006271975.1	-	-	-	-	-	hypothetical protein	18170882	-	-	-	-
CCM_01365	4417.11	11831.6	1.42147	0.0205655	0.168866	NW_006271969.1	-	K21631	sordNOG04529	TG	sp|Q10294|PAC2_SCHPO cAMP-independent regulatory protein pac2 OS=Schizosaccharomyces pombe (strain 972 / ATCC 24843) GN=pac2 PE=2 SV=1	camp independent regulatory protein	18163396	-	-	-	-
CCM_08296	53.1568	191.344	1.84784	0.0206011	0.168866	NW_006271975.1	-	-	-	-	-	hypothetical protein	18170304	-	-	-	-
CCM_01382	1515.79	5093.26	1.74852	0.0208043	0.16971	NW_006271969.1	GO:0004252;GO:0016021;GO:0006508	-	sordNOG09652;sorNOG02532	T	sp|C8VCL5|Y0929_EMENI Uncharacterized rhomboid protein AN10929 OS=Emericella nidulans (strain FGSC A4 / ATCC 38163 / CBS 112.46 / NRRL 194 / M139) GN=AN10929 PE=3 SV=1	rhomboid family membrane protein	18163413	GO:0006508//proteolysis;	GO:0016021//integral component of membrane;	GO:0004252//serine-type endopeptidase activity;	-
CCM_06828	415.124	1173.98	1.49979	0.0208155	0.16971	NW_006271973.1	GO:0008483;GO:0006730;GO:0004375;GO:0055114;GO:0004047;GO:0032259;GO:0006546	K00605	sordNOG06837	E	sp|O14110|GCST_SCHPO Probable aminomethyltransferase, mitochondrial OS=Schizosaccharomyces pombe (strain 972 / ATCC 24843) GN=gcv1 PE=3 SV=1	aminomethyltransferase	18168839	GO:0006730//one-carbon metabolic process;GO:0055114//obsolete oxidation-reduction process;GO:0032259//methylation;GO:0006546//glycine catabolic process;	-	GO:0008483//transaminase activity;GO:0004375//glycine dehydrogenase (decarboxylating) activity;GO:0004047//aminomethyltransferase activity;	ko00670(One carbon pool by folate);ko00630(Glyoxylate and dicarboxylate metabolism);ko00260(Glycine, serine and threonine metabolism)
CCM_04136	0.650213	7.74524	3.57433	0.0213221	0.172603	NW_006271971.1	-	-	-	-	-	hypothetical protein	18166159	-	-	-	-
CCM_04420	48.8389	107.139	1.13338	0.021452	0.173107	NW_006271971.1	GO:0008152;GO:0016787	-	opiNOG28534;pleNOG03931	R	sp|Q01109|BAH_STRHY Acetyl-hydrolase OS=Streptomyces hygroscopicus GN=bah PE=3 SV=3	alpha/beta hydrolase fold-3 domain containing protein	18166443	GO:0008152//metabolic process;	-	GO:0016787//hydrolase activity;	-
CCM_00064	474.39	1528.74	1.6882	0.0217423	0.174682	NW_006271969.1	-	-	sordNOG12711	S	-	hypothetical protein	18162099	-	-	-	-
CCM_02730	6.20971	20.2914	1.70827	0.0219644	0.175575	NW_006271970.1	GO:0016787	-	sordNOG08239;opiNOG07274	R	-	hypothetical protein	18164757	-	-	GO:0016787//hydrolase activity;	-
CCM_06643	339.007	988.88	1.54448	0.0222203	0.17619	NW_006271973.1	-	-	opiNOG36740;sordNOG12614	S	sp|Q9HDW5|YFW6_SCHPO UPF0644 protein PB2B4.06 OS=Schizosaccharomyces pombe (strain 972 / ATCC 24843) GN=SPAPB2B4.06 PE=3 SV=2	thioesterase	18168657	-	-	-	-
CCM_09543	157.779	683.19	2.11438	0.0229217	0.179221	NW_006271977.1	GO:0055114;GO:0004497	-	opiNOG19837;COG2072	RP	sp|A0R665|ETHA_MYCS2 FAD-containing monooxygenase EthA OS=Mycobacterium smegmatis (strain ATCC 700084 / mc(2)155) GN=ethA PE=3 SV=1	monooxygenase, putative	18171545	GO:0055114//obsolete oxidation-reduction process;	-	GO:0004497//monooxygenase activity;	-
CCM_04917	180.263	421.286	1.22469	0.0237457	0.183576	NW_006271971.1	GO:0016021	-	sordNOG11805;opiNOG24592	E	sp|P38680|MTR_NEUCR N amino acid transport system protein OS=Neurospora crassa (strain ATCC 24698 / 74-OR23-1A / CBS 708.71 / DSM 1257 / FGSC 987) GN=mtr PE=3 SV=2	amino acid transporter, putative	18166938	-	GO:0016021//integral component of membrane;	-	-
CCM_07112	633.596	1703.3	1.4267	0.0241995	0.185121	NW_006271973.1	GO:0005634;GO:0005829;GO:0009395;GO:0003847;GO:0034599	K01062	sordNOG07332	I	sp|Q9URV1|PLG7_SCHPO Putative phospholipase A2 OS=Schizosaccharomyces pombe (strain 972 / ATCC 24843) GN=plg7 PE=3 SV=1	platelet-activating factor acetylhydrolase 2	18169123	GO:0009395//phospholipid catabolic process;GO:0034599//cellular response to oxidative stress;	GO:0005634//nucleus;GO:0005829//cytosol;	GO:0003847//1-alkyl-2-acetylglycerophosphocholine esterase activity;	ko00565(Ether lipid metabolism)
CCM_01113	682.594	1488.93	1.12517	0.0242148	0.185121	NW_006271969.1	-	-	-	-	-	hypothetical protein	18163145	-	-	-	-
CCM_08552	237.629	1425.46	2.58465	0.0243478	0.185548	NW_006271975.1	GO:0055085;GO:0016021	-	COG0477;sordNOG05733;opiNOG03553	GR	sp|W7N2B4|FUB11_GIBM7 Efflux pump FUB11 OS=Gibberella moniliformis (strain M3125 / FGSC 7600) GN=FUB11 PE=1 SV=2	MFS multidrug transporter, putative	18170559	GO:0055085//transmembrane transport;	GO:0016021//integral component of membrane;	-	-
CCM_07842	175.686	524.083	1.5768	0.0244077	0.18571	NW_006271974.1	-	-	opiNOG41101	S	-	hypothetical protein	18169852	-	-	-	-
CCM_03080	104.388	281.564	1.43151	0.0245799	0.186579	NW_006271970.1	GO:0030687;GO:0042273;GO:0005730	K14839	opiNOG14322;sordNOG12591	J	sp|A4R9U5|NOP16_MAGO7 Nucleolar protein 16 OS=Magnaporthe oryzae (strain 70-15 / ATCC MYA-4617 / FGSC 8958) GN=NOP16 PE=3 SV=2	nucleolar protein 16	18165107	GO:0042273//ribosomal large subunit biogenesis;	GO:0030687//preribosome, large subunit precursor;GO:0005730//nucleolus;	-	-
CCM_08618	2061.18	5576.68	1.43593	0.0249604	0.188722	NW_006271975.1	-	K03362	sordNOG11138;sordNOG06339	R	sp|Q09855|POF11_SCHPO F-box/WD repeat-containing protein pof11 OS=Schizosaccharomyces pombe (strain 972 / ATCC 24843) GN=pof11 PE=1 SV=2	F-box and WD domain protein	18170624	-	-	-	ko05170(Human immunodeficiency virus 1 infection);ko05131(Shigellosis);ko04710(Circadian rhythm);ko04624(Toll and Imd signaling pathway);ko04390(Hippo signaling pathway);ko04341(Hedgehog signaling pathway - fly);ko04340(Hedgehog signaling pathway);ko04310(Wnt signaling pathway);ko04218(Cellular senescence);ko04120(Ubiquitin mediated proteolysis);ko04114(Oocyte meiosis)
CCM_06547	60.8721	131.383	1.10992	0.0250781	0.189166	NW_006271973.1	-	-	sordNOG05103;opiNOG13361;sorNOG08561;pleNOG00881	QR	sp|P39577|DLTE_BACSU Uncharacterized oxidoreductase DltE OS=Bacillus subtilis (strain 168) GN=dltE PE=3 SV=2	short-chain dehydrogenases/reductase, putative	18168561	-	-	-	-
CCM_04429	30.9338	61.9113	1.00102	0.0252867	0.190049	NW_006271971.1	GO:0016021	-	sordNOG12504;necNOG09156;hypNOG05904	S	-	hypothetical protein	18166452	-	GO:0016021//integral component of membrane;	-	-
CCM_04720	26.0864	53.6231	1.03956	0.0255083	0.190828	NW_006271971.1	-	-	opiNOG42972	S	-	hypothetical protein	18166741	-	-	-	-
CCM_01717	25.1313	52.3386	1.05839	0.0259114	0.192288	NW_006271969.1	-	-	sordNOG12367;opiNOG38933	S	sp|Q82CX8|Y5210_STRAW UPF0303 protein SAV_5210 OS=Streptomyces avermitilis (strain ATCC 31267 / DSM 46492 / JCM 5070 / NBRC 14893 / NCIMB 12804 / NRRL 8165 / MA-4680) GN=SAV_5210 PE=3 SV=1	DUF967 domain protein	18163747	-	-	-	-
CCM_02283	5.23265	17.7028	1.75837	0.0262745	0.193684	NW_006271970.1	-	-	hypNOG14373	R	-	hypothetical protein	18164310	-	-	-	-
CCM_06566	708.855	1738.01	1.29388	0.0272133	0.19858	NW_006271973.1	GO:0008080	K00621	opiNOG26747;sorNOG03471;sordNOG04785	M	sp|O93806|GNA1_CANAX Glucosamine 6-phosphate N-acetyltransferase OS=Candida albicans GN=GNA1 PE=3 SV=1	glucosamine 6-phosphate N-acetyltransferase	18168580	-	-	GO:0008080//N-acetyltransferase activity;	ko00520(Amino sugar and nucleotide sugar metabolism)
CCM_05405	1656.51	6056.22	1.87028	0.0276683	0.200835	NW_006271972.1	GO:0016021;GO:0005886	-	sordNOG11656;hypNOG03704;opiNOG26741	S	-	integral membrane protein	18167423	-	GO:0016021//integral component of membrane;GO:0005886//plasma membrane;	-	-
CCM_08035	36.8152	332.303	3.17413	0.0278902	0.201764	NW_006271974.1	GO:0020037;GO:0005506;GO:0016705;GO:0055114;GO:0004497	-	sordNOG05558;opiNOG01633	Q	sp|Q99N16|CP4F3_MOUSE Leukotriene-B(4) omega-hydroxylase 2 OS=Mus musculus GN=Cyp4f3 PE=1 SV=2	Cytochrome P450 oxidoreductase, putative	18170044	GO:0055114//obsolete oxidation-reduction process;	-	GO:0020037//heme binding;GO:0005506//iron ion binding;GO:0016705//oxidoreductase activity, acting on paired donors, with incorporation or reduction of molecular oxygen;GO:0004497//monooxygenase activity;	-
CCM_07870	562.243	1158.95	1.04355	0.0279967	0.202304	NW_006271974.1	-	-	sordNOG09317	R	-	hypothetical protein	18169880	-	-	-	-
CCM_07225	3145.92	8686.23	1.46525	0.028045	0.202433	NW_006271973.1	-	-	opiNOG21337	R	sp|D4ALG0|LYSM1_ARTBC LysM domain-containing protein ARB_05157 OS=Arthroderma benhamiae (strain ATCC MYA-4681 / CBS 112371) GN=ARB_05157 PE=1 SV=1	LysM domain protein	18169236	-	-	-	-
CCM_03537	365.176	3941.86	3.43221	0.0280574	0.202433	NW_006271970.1	GO:0005576	-	sordNOG14070;opiNOG38583	R	sp|P52753|CRYP_CRYPA Cryparin OS=Cryphonectria parasitica GN=CRP PE=1 SV=1	Hydrophobin 2	18165563	-	GO:0005576//extracellular region;	-	-
CCM_06523	129.155	366.715	1.50555	0.0283509	0.203336	NW_006271973.1	GO:0045895;GO:0008301;GO:0005634	-	sordNOG14609;opiNOG62405;opiNOG47657	SK	sp|O59851|MAT1_FUSOX Mating-type protein MAT-1 OS=Fusarium oxysporum GN=MAT1 PE=3 SV=2	mating-type protein MAT 1-1-1	18168537	GO:0045895//positive regulation of mating-type specific transcription, DNA-templated;	GO:0005634//nucleus;	GO:0008301//DNA binding, bending;	-
CCM_01458	101.216	331.168	1.71012	0.0287206	0.205223	NW_006271969.1	GO:0030686;GO:0003676;GO:0000447;GO:0005730;GO:0000472;GO:0004004;GO:0005524;GO:0000480	K14778	sordNOG06241	J	sp|Q4I662|DBP8_GIBZE ATP-dependent RNA helicase DBP8 OS=Gibberella zeae (strain PH-1 / ATCC MYA-4620 / FGSC 9075 / NRRL 31084) GN=DBP8 PE=3 SV=1	ATP dependent RNA helicase (Dbp8)	18163489	GO:0000447//endonucleolytic cleavage in ITS1 to separate SSU-rRNA from 5.8S rRNA and LSU-rRNA from tricistronic rRNA transcript (SSU-rRNA, 5.8S rRNA, LSU-rRNA);GO:0000472//endonucleolytic cleavage to generate mature 5'-end of SSU-rRNA from (SSU-rRNA, 5.8S rRNA, LSU-rRNA);GO:0000480//endonucleolytic cleavage in 5'-ETS of tricistronic rRNA transcript (SSU-rRNA, 5.8S rRNA, LSU-rRNA);	GO:0030686//90S preribosome;GO:0005730//nucleolus;	GO:0003676//nucleic acid binding;GO:0005524//ATP binding;	-
CCM_00948	4441.32	13654.2	1.62028	0.0289329	0.206027	NW_006271969.1	GO:0005975;GO:0016021;GO:0004553	-	sordNOG09381;opiNOG01397;sordNOG15367	S	sp|Q8N0N3|BGBP_PENMO Beta-1,3-glucan-binding protein OS=Penaeus monodon PE=2 SV=1	glucan 1,3-beta-glucosidase	18162981	GO:0005975//carbohydrate metabolic process;	GO:0016021//integral component of membrane;	GO:0004553//hydrolase activity, hydrolyzing O-glycosyl compounds;	-
CCM_09219	104.009	212.614	1.03153	0.0292536	0.207608	NW_006271976.1	GO:0016021	-	sordNOG14340	S	-	low temperature requirement protein A	18171222	-	GO:0016021//integral component of membrane;	-	-
CCM_02666	8297.02	23621.3	1.50943	0.0294336	0.208131	NW_006271970.1	-	-	opiNOG10497;sordNOG11755	S	-	hypothetical protein	18164693	-	-	-	-
CCM_03113	2.29346	11.3828	2.31125	0.0295005	0.208322	NW_006271970.1	GO:0016310;GO:0016301	-	sordNOG07037;opiNOG05145	S	sp|P0DOV8|KDSGA_PSEPU 2-dehydro-3,6-dideoxy-6-sulfogluconate aldolase OS=Pseudomonas putida GN=PpSQ1_00455 PE=1 SV=1	Pyruvate/Phosphoenolpyruvate kinase	18165140	GO:0016310//phosphorylation;	-	GO:0016301//kinase activity;	-
CCM_05883	15.6151	35.4	1.18081	0.0296762	0.208647	NW_006271972.1	-	-	sorNOG07939;opiNOG24886;sordNOG08554	RL	-	hypothetical protein	18167901	-	-	-	-
CCM_03378	434.864	1909.05	2.13422	0.0296766	0.208647	NW_006271970.1	GO:0006357;GO:0008270;GO:0000981;GO:0005634	-	opiNOG20198;opiNOG44302;sordNOG09314	KS	sp|O93870|FCR1_CANAX Fluconazole resistance protein 1 OS=Candida albicans GN=FCR1 PE=4 SV=1	C6 transcription factor	18165404	GO:0006357//regulation of transcription by RNA polymerase II;	GO:0005634//nucleus;	GO:0008270//zinc ion binding;GO:0000981//DNA-binding transcription factor activity, RNA polymerase II-specific;	-
CCM_03408	2.59935	12.1114	2.22014	0.0301524	0.210392	NW_006271970.1	GO:0004386;GO:0000166	-	hypNOG14135	S	-	hypothetical protein	18165434	-	-	GO:0004386//helicase activity;GO:0000166//nucleotide binding;	-
CCM_06700	717.882	1933.09	1.42909	0.030219	0.210392	NW_006271973.1	-	K22151	opiNOG12372;sordNOG05238	S	sp|A0A084API4|SAT14_STACB Putative O-acetyltransferase SAT14 OS=Stachybotrys chartarum (strain CBS 109288 / IBT 7711) GN=SAT14 PE=3 SV=1	Siderophore biosynthesis protein	18168714	-	-	-	-
CCM_09030	61.7348	125.965	1.02887	0.0302979	0.210402	NW_006271975.1	GO:0016021	-	opiNOG28457;NOG228224;sordNOG12121	S	-	hypothetical protein	18171034	-	GO:0016021//integral component of membrane;	-	-
CCM_08042	440.851	1971.86	2.16119	0.0304068	0.210702	NW_006271974.1	GO:0016021	-	necNOG07757;hypNOG05306	S	-	hypothetical protein	18170051	-	GO:0016021//integral component of membrane;	-	-
CCM_08920	204.007	413.861	1.02053	0.0308506	0.211436	NW_006271975.1	GO:0005634;GO:0000981;GO:0008270;GO:0006357	-	eurotNOG11542;sorNOG07345;opiNOG06605	SK	sp|A0A0N6WJC7|DHC4_ALTCI Dehydrocurvularin biosynthesis regulator OS=Alternaria cinerariae GN=Dhc4 PE=2 SV=1	C6 zinc finger domain containing protein	18170925	GO:0006357//regulation of transcription by RNA polymerase II;	GO:0005634//nucleus;	GO:0000981//DNA-binding transcription factor activity, RNA polymerase II-specific;GO:0008270//zinc ion binding;	-
CCM_02450	496.251	1083.55	1.12663	0.0313054	0.213258	NW_006271970.1	GO:0007034;GO:0005622	K12195	sordNOG08772;opiNOG29058	RU	sp|P0C0A3|CHMP6_MOUSE Charged multivesicular body protein 6 OS=Mus musculus GN=Chmp6 PE=1 SV=2	SNF7 family protein	18164477	GO:0007034//vacuolar transport;	GO:0005622//intracellular anatomical structure;	-	ko04217(Necroptosis);ko04144(Endocytosis)
CCM_08207	20.8632	43.8942	1.07307	0.0315227	0.214055	NW_006271974.1	GO:0005975;GO:0004565	-	sorNOG07288;opiNOG04358	G	sp|P48982|BGAL_XANMN Beta-galactosidase OS=Xanthomonas manihotis GN=bga PE=1 SV=1	beta-calactosidase, putative	18170215	GO:0005975//carbohydrate metabolic process;	-	GO:0004565//beta-galactosidase activity;	-
CCM_05068	10.7847	33.8193	1.64887	0.0316152	0.214142	NW_006271972.1	-	-	sorNOG08077;opiNOG41235	LS	-	hypothetical protein	18167088	-	-	-	-
CCM_01283	54.0331	214.57	1.98954	0.0320731	0.215876	NW_006271969.1	GO:0016747	K19747	sordNOG13270;opiNOG45029	S	sp|C8VPT2|EASC_EMENI Acyltransferase easC OS=Emericella nidulans (strain FGSC A4 / ATCC 38163 / CBS 112.46 / NRRL 194 / M139) GN=easC PE=3 SV=1	Transferase	18163314	-	-	GO:0016747//acyltransferase activity, transferring groups other than amino-acyl groups;	-
CCM_09598	64.0857	580.581	3.17942	0.0323592	0.21671	NW_006271978.1	GO:0016021	-	hypNOG09992;sordNOG14665;necNOG11704	S	-	hypothetical protein	18171600	-	GO:0016021//integral component of membrane;	-	-
CCM_06907	281.947	1125.08	1.99653	0.0328903	0.218561	NW_006271973.1	GO:0016705;GO:0055114;GO:0004497	-	sorNOG02387;sordNOG07174;opiNOG19546	S	sp|E9JFX9|DMOA_HYPSL Dimethyl-sulfide monooxygenase OS=Hyphomicrobium sulfonivorans GN=dmoA PE=1 SV=1	xenobiotic compound monooxygenase, DszA family	18168918	GO:0055114//obsolete oxidation-reduction process;	-	GO:0016705//oxidoreductase activity, acting on paired donors, with incorporation or reduction of molecular oxygen;GO:0004497//monooxygenase activity;	-
CCM_05660	18.2464	62.5162	1.77662	0.0332882	0.219774	NW_006271972.1	GO:0055085;GO:0016021	K22134	opiNOG11646	R	sp|D7PI13|GSFJ_PENAE Probable efflux pump gsfJ OS=Penicillium aethiopicum GN=gsfJ PE=1 SV=1	efflux pump antibiotic resistance protein, putative	18167678	GO:0055085//transmembrane transport;	GO:0016021//integral component of membrane;	-	-
CCM_05447	2350.63	5128.56	1.12551	0.0333023	0.219774	NW_006271972.1	GO:0016021;GO:0008810;GO:0030246;GO:0000272	-	hypNOG01761;opiNOG33856;opiNOG49512;necNOG08619	RS	-	Concanavalin A-like lectin/glucanase	18167465	GO:0000272//polysaccharide catabolic process;	GO:0016021//integral component of membrane;	GO:0008810//cellulase activity;GO:0030246//carbohydrate binding;	-
CCM_02115	6.47967	24.9518	1.94515	0.0336026	0.22107	NW_006271970.1	GO:0016021	-	-	-	-	hypothetical protein	18164143	-	GO:0016021//integral component of membrane;	-	-
CCM_04033	23.4616	48.266	1.04071	0.0336749	0.221106	NW_006271971.1	-	-	-	-	-	hypothetical protein	18166056	-	-	-	-
CCM_01256	930.397	3414.77	1.87587	0.033677	0.221106	NW_006271969.1	-	K22684	opiNOG01648;sordNOG06477;sordNOG10123;sorNOG06854	DO	sp|Q7S4N5|MCA1B_NEUCR Metacaspase-1B OS=Neurospora crassa (strain ATCC 24698 / 74-OR23-1A / CBS 708.71 / DSM 1257 / FGSC 987) GN=casB PE=3 SV=2	Peptidase C14, caspase catalytic	18163287	-	-	-	-
CCM_08397	778.974	1829.34	1.23167	0.0337617	0.221511	NW_006271975.1	GO:0005886;GO:0016021	-	sorNOG05098;sordNOG13455;opiNOG32485	S	-	Signal transduction response regulator	18170405	-	GO:0005886//plasma membrane;GO:0016021//integral component of membrane;	-	-
CCM_07042	44.6427	118.064	1.40307	0.0340758	0.222253	NW_006271973.1	GO:0016021;GO:0055085	K01533	opiNOG21866;hypNOG08574;sordNOG10509	SPR	sp|S0ECK8|FUJ4_GIBF5 Fujikurins efflux protein FFUJ_12242 OS=Gibberella fujikuroi (strain CBS 195.34 / IMI 58289 / NRRL A-6831) GN=FFUJ_12242 PE=2 SV=1	Major facilitator superfamily transporter	18169053	GO:0055085//transmembrane transport;	GO:0016021//integral component of membrane;	-	-
CCM_06702	344.068	1002.35	1.54262	0.0348818	0.22563	NW_006271973.1	GO:0016874;GO:0008152;GO:0031177	K22152	sordNOG07176;opiNOG18048	I	sp|Q4WF53|NRPS4_ASPFU Nonribosomal peptide synthetase 4 OS=Neosartorya fumigata (strain ATCC MYA-4609 / Af293 / CBS 101355 / FGSC A1100) GN=NRPS4 PE=2 SV=1	AMP-dependent synthetase/ligase	18168716	GO:0008152//metabolic process;	-	GO:0016874//ligase activity;GO:0031177//phosphopantetheine binding;	-
CCM_02508	6.17228	18.5933	1.59091	0.0353528	0.227301	NW_006271970.1	-	-	-	-	-	hypothetical protein	18164535	-	-	-	-
CCM_04024	2.9337	12.4405	2.08425	0.0354025	0.227301	NW_006271971.1	-	-	-	-	-	hypothetical protein	18166047	-	-	-	-
CCM_04310	235.167	478.863	1.02592	0.0354235	0.227301	NW_006271971.1	GO:0043039;GO:0005524;GO:0004812	-	opiNOG19092;COG2872;sorNOG04830	R	sp|O57734|ALAXL_PYRHO Alanyl-tRNA editing protein AlaX-L OS=Pyrococcus horikoshii (strain ATCC 700860 / DSM 12428 / JCM 9974 / NBRC 100139 / OT-3) GN=alaXL PE=3 SV=1	alanyl-tRNA synthetase	18166333	GO:0043039//tRNA aminoacylation;	-	GO:0005524//ATP binding;GO:0004812//aminoacyl-tRNA ligase activity;	-
CCM_08609	2576.63	7196.89	1.48189	0.0357276	0.227919	NW_006271975.1	-	-	euNOG06377;NOG17422;opiNOG04617;opiNOG11253	SGRO	sp|D4AUF4|WSCD2_ARTBC WSC domain-containing protein ARB_07870 OS=Arthroderma benhamiae (strain ATCC MYA-4681 / CBS 112371) GN=ARB_07870 PE=1 SV=1	Pyrrolo-quinoline quinone	18170615	-	-	-	-
CCM_07009	1114.52	2937.15	1.39799	0.0363259	0.229571	NW_006271973.1	-	-	sordNOG09794	S	sp|Q59QC7|UPC2_CANAL Sterol uptake control protein 2 OS=Candida albicans (strain SC5314 / ATCC MYA-2876) GN=UPC2 PE=1 SV=1	C6 transcription factor	18169020	-	-	-	-
CCM_07614	2174.04	5038	1.21247	0.0363959	0.229704	NW_006271974.1	-	-	opiNOG28628;opiNOG36561;hypNOG03705;sordNOG09242;NOG50130	S	-	hypothetical protein	18169625	-	-	-	-
CCM_07755	252.501	511.095	1.0173	0.0367269	0.231043	NW_006271974.1	-	-	sordNOG15256	S	-	hypothetical protein	18169765	-	-	-	-
CCM_04698	23.1043	46.8741	1.02063	0.0370947	0.232129	NW_006271971.1	GO:0016021	-	sordNOG13201	S	-	hypothetical protein	18166720	-	GO:0016021//integral component of membrane;	-	-
CCM_08466	4.89831	16.4278	1.74578	0.0372807	0.232726	NW_006271975.1	GO:0006468;GO:0004672;GO:0005524	-	opiNOG59985;opiNOG56073;COG0515	T	sp|G9LZD7|XIAO_ORYSJ Probable inactive leucine-rich repeat receptor kinase XIAO OS=Oryza sativa subsp. japonica GN=XIAO PE=2 SV=1	Protein kinase-like domain	18170473	GO:0006468//protein phosphorylation;	-	GO:0004672//protein kinase activity;GO:0005524//ATP binding;	-
CCM_06025	1553.29	7314.07	2.23535	0.0373067	0.232726	NW_006271972.1	-	-	opiNOG33566;sordNOG15318	RS	-	GPI anchored cell wall protein, putative	18168043	-	-	-	-
CCM_00066	517.026	1078.09	1.06017	0.0374193	0.232963	NW_006271969.1	-	-	sordNOG08266	S	sp|A1D1S7|SSH4_NEOFI Protein ssh4 OS=Neosartorya fischeri (strain ATCC 1020 / DSM 3700 / CBS 544.65 / FGSC A1164 / JCM 1740 / NRRL 181 / WB 181) GN=ssh4 PE=3 SV=1	hypothetical protein	18162101	-	-	-	-
CCM_09005	176.832	458.718	1.37523	0.0383482	0.236549	NW_006271975.1	GO:0055085;GO:0042626;GO:0016021;GO:0005524	K05658	sordNOG08435	Q	sp|P36619|PMD1_SCHPO Leptomycin B resistance protein pmd1 OS=Schizosaccharomyces pombe (strain 972 / ATCC 24843) GN=pmd1 PE=3 SV=2	ABC multidrug transporter SitT	18171009	GO:0055085//transmembrane transport;	GO:0016021//integral component of membrane;	GO:0042626//ATPase-coupled transmembrane transporter activity;GO:0005524//ATP binding;	ko05226(Gastric cancer);ko05206(MicroRNAs in cancer);ko04976(Bile secretion);ko02010(ABC transporters)
CCM_04978	194.89	555.512	1.51116	0.0383639	0.236549	NW_006271971.1	-	-	opiNOG61747;sordNOG14699	S	-	hypothetical protein	18166998	-	-	-	-
CCM_09143	165.786	382.26	1.20523	0.0384507	0.236669	NW_006271976.1	GO:0000447;GO:0034388;GO:0000472;GO:0030010;GO:0032040;GO:0000480;GO:0030515;GO:0005829	K14558	sordNOG06810	A	sp|Q9C270|PWP2_NEUCR Periodic tryptophan protein 2 homolog OS=Neurospora crassa (strain ATCC 24698 / 74-OR23-1A / CBS 708.71 / DSM 1257 / FGSC 987) GN=B18D24.40 PE=3 SV=1	Periodic tryptophan protein 2	18171146	GO:0000447//endonucleolytic cleavage in ITS1 to separate SSU-rRNA from 5.8S rRNA and LSU-rRNA from tricistronic rRNA transcript (SSU-rRNA, 5.8S rRNA, LSU-rRNA);GO:0000472//endonucleolytic cleavage to generate mature 5'-end of SSU-rRNA from (SSU-rRNA, 5.8S rRNA, LSU-rRNA);GO:0030010//establishment of cell polarity;GO:0000480//endonucleolytic cleavage in 5'-ETS of tricistronic rRNA transcript (SSU-…	GO:0034388//Pwp2p-containing subcomplex of 90S preribosome;GO:0032040//small-subunit processome;GO:0005829//cytosol;	GO:0030515//snoRNA binding;	ko03008(Ribosome biogenesis in eukaryotes)
CCM_01702	66.1242	168.525	1.34971	0.0384572	0.236669	NW_006271969.1	-	-	opiNOG64237	S	sp|Q02481|Y3691_SHEFN Uncharacterized protein Sfri_3691 OS=Shewanella frigidimarina (strain NCIMB 400) GN=Sfri_3691 PE=4 SV=2	glyoxalase family protein	18163732	-	-	-	-
CCM_08251	84.1824	199.539	1.24508	0.0386989	0.237549	NW_006271975.1	GO:0004177;GO:0006508	-	opiNOG50453	R	sp|W7N6P0|FUS2_GIBM7 20-hydroxy-prefusarin hydrolase FUS2 OS=Gibberella moniliformis (strain M3125 / FGSC 7600) GN=FUS2 PE=3 SV=1	dipeptidyl aminopeptidase/acylaminoacyl-peptidase related protein	18170259	GO:0006508//proteolysis;	-	GO:0004177//aminopeptidase activity;	-
CCM_03579	876.184	1933.21	1.14169	0.0389834	0.238439	NW_006271970.1	GO:0003824;GO:0042823;GO:0042819	K06215	sordNOG08170	H	sp|Q9UW83|PDX1_EMENI Pyridoxal 5&apos;-phosphate synthase subunit pyroA OS=Emericella nidulans (strain FGSC A4 / ATCC 38163 / CBS 112.46 / NRRL 194 / M139) GN=pyroA PE=3 SV=1	pyridoxine biosynthesis protein	18165605	GO:0042823//pyridoxal phosphate biosynthetic process;GO:0042819//vitamin B6 biosynthetic process;	-	GO:0003824//catalytic activity;	ko00750(Vitamin B6 metabolism)
CCM_03449	623.884	1263.01	1.01752	0.0392008	0.239408	NW_006271970.1	GO:0005524	-	opiNOG04381;sordNOG10532	O	sp|P87142|YDMC_SCHPO Heat shock protein 70 homolog C57A7.12 OS=Schizosaccharomyces pombe (strain 972 / ATCC 24843) GN=SPAC57A7.12 PE=1 SV=3	Hsp70 chaperone (BiP), putative	18165475	-	-	GO:0005524//ATP binding;	-
CCM_08247	5.20121	27.2547	2.38959	0.0397229	0.241563	NW_006271975.1	GO:0016829;GO:0008152	K01714	sordNOG07309	E	sp|A4SX51|DAPA_POLAQ 4-hydroxy-tetrahydrodipicolinate synthase OS=Polynucleobacter asymbioticus (strain DSM 18221 / CIP 109841 / QLW-P1DMWA-1) GN=dapA PE=3 SV=1	dihydrodipicolinate synthetase	18170255	GO:0008152//metabolic process;	-	GO:0016829//lyase activity;	ko00300(Lysine biosynthesis);ko00261(Monobactam biosynthesis)
CCM_08809	510.156	1084.21	1.08763	0.0404937	0.243738	NW_006271975.1	GO:0050662;GO:0003824	-	opiNOG06831	R	sp|P44094|DEND_HAEIN D-erythronate dehydrogenase OS=Haemophilus influenzae (strain ATCC 51907 / DSM 11121 / KW20 / Rd) GN=denD PE=1 SV=1	nucleoside-diphosphate-sugar epimerase, putative	18170814	-	-	GO:0050662//obsolete coenzyme binding;GO:0003824//catalytic activity;	-
CCM_03803	25.4511	86.0799	1.75795	0.0408445	0.244666	NW_006271971.1	-	-	-	-	-	hypothetical protein	18165826	-	-	-	-
CCM_00949	10586.6	32244.1	1.6068	0.0408497	0.244666	NW_006271969.1	GO:0016021	-	sorNOG02914;sordNOG04770;opiNOG15789	S	-	hypothetical protein	18162982	-	GO:0016021//integral component of membrane;	-	-
CCM_01170	694.944	2173.15	1.64482	0.0412626	0.24596	NW_006271969.1	GO:0016021;GO:0005794	-	sordNOG05130	S	sp|Q10260|YD2C_SCHPO Uncharacterized protein C56F8.12 OS=Schizosaccharomyces pombe (strain 972 / ATCC 24843) GN=SPAC56F8.12 PE=4 SV=1	hypothetical protein	18163202	-	GO:0016021//integral component of membrane;GO:0005794//Golgi apparatus;	-	-
CCM_00154	8.11044	34.694	2.09683	0.0415701	0.247241	NW_006271969.1	GO:0006355;GO:0043565;GO:0003700;GO:0005634	-	opiNOG39437;opiNOG42918;NOG105687;sordNOG13800	SK	sp|P32030|SLP1_DROME Fork head domain transcription factor slp1 OS=Drosophila melanogaster GN=slp1 PE=2 SV=1	forkhead domain-containing protein	18162189	GO:0006355//regulation of transcription, DNA-templated;	GO:0005634//nucleus;	GO:0043565//sequence-specific DNA binding;GO:0003700//DNA-binding transcription factor activity;	-
CCM_02594	0	6.2057	Inf	0.0418135	0.248122	NW_006271970.1	-	-	-	-	-	hypothetical protein	18164621	-	-	-	-
CCM_08250	358.074	931.671	1.37956	0.042516	0.250616	NW_006271975.1	GO:0005634;GO:0000981;GO:0006357;GO:0003677;GO:0008270	-	opiNOG50133	K	sp|Q4I0C5|RDR1_GIBZE Protein RDR1 OS=Gibberella zeae (strain PH-1 / ATCC MYA-4620 / FGSC 9075 / NRRL 31084) GN=RDR1 PE=3 SV=1	C6 transcription factor, putative	18170258	GO:0006357//regulation of transcription by RNA polymerase II;	GO:0005634//nucleus;	GO:0000981//DNA-binding transcription factor activity, RNA polymerase II-specific;GO:0003677//DNA binding;GO:0008270//zinc ion binding;	-
CCM_05378	440.51	1569.85	1.83338	0.0432093	0.253665	NW_006271972.1	GO:0005524;GO:0003723;GO:0004386	K14806	sordNOG12069	J	sp|Q4HZ68|DBP7_GIBZE ATP-dependent RNA helicase DBP7 OS=Gibberella zeae (strain PH-1 / ATCC MYA-4620 / FGSC 9075 / NRRL 31084) GN=DBP7 PE=3 SV=1	DNA/RNA helicase, DEAD/DEAH box type	18167396	-	-	GO:0005524//ATP binding;GO:0003723//RNA binding;GO:0004386//helicase activity;	-
CCM_03066	1227.6	2627.8	1.09802	0.0434788	0.254624	NW_006271970.1	-	-	opiNOG35256;sordNOG08188	S	-	hypothetical protein	18165093	-	-	-	-
CCM_00626	7.16682	20.08	1.48636	0.0435427	0.254771	NW_006271969.1	GO:0016021	-	opiNOG60462;opiNOG35042;sordNOG15170	S	-	hypothetical protein	18162661	-	GO:0016021//integral component of membrane;	-	-
CCM_08975	0.976567	9.34628	3.2586	0.0447252	0.258137	NW_006271975.1	-	-	arthNOG09913;opiNOG31965;opiNOG23127	R	-	Cyclin-like F-box	18170979	-	-	-	-
CCM_03226	7.80654	21.1611	1.43866	0.0450867	0.25908	NW_006271970.1	GO:0006469;GO:0006521;GO:0004860;GO:0043022;GO:0003785	-	sordNOG04775;opiNOG24335	S	sp|P25637|YIH1_YEAST Protein IMPACT homolog OS=Saccharomyces cerevisiae (strain ATCC 204508 / S288c) GN=YIH1 PE=1 SV=1	impact family protein	18165252	GO:0006469//negative regulation of protein kinase activity;GO:0006521//regulation of cellular amino acid metabolic process;	-	GO:0004860//protein kinase inhibitor activity;GO:0043022//ribosome binding;GO:0003785//actin monomer binding;	-
CCM_09423	28.7561	64.1648	1.15791	0.0455501	0.260499	NW_006271977.1	-	-	sordNOG13776;sorNOG05942	S	-	hypothetical protein	18171426	-	-	-	-
CCM_01312	1591.35	3221.71	1.01757	0.0458498	0.261127	NW_006271969.1	GO:0016021;GO:0030148;GO:0070916;GO:0006673;GO:0045140	K22723	sordNOG11533	I	sp|Q10142|AUR1_SCHPO Inositol phosphorylceramide synthase catalytic subunit aur1 OS=Schizosaccharomyces pombe (strain 972 / ATCC 24843) GN=aur1 PE=1 SV=1	aureobasidin resistance protein Aur1	18163343	GO:0030148//sphingolipid biosynthetic process;GO:0006673//inositol phosphoceramide metabolic process;	GO:0016021//integral component of membrane;GO:0070916//inositol phosphoceramide synthase complex;	GO:0045140//inositol phosphoceramide synthase activity;	-
CCM_05184	1089.3	3292.66	1.59585	0.0462845	0.262515	NW_006271972.1	GO:0016740	-	NOG39026;hypNOG06572	RS	-	dihydropyrimidine dehydrogenase	18167203	-	-	GO:0016740//transferase activity;	-
CCM_02724	119.768	277.215	1.21075	0.0463793	0.262849	NW_006271970.1	GO:0000981;GO:0005634;GO:0008270;GO:0006357;GO:0003677	-	hypNOG04222;opiNOG51012	SR	-	C6 and C2H2 transcription factor, putative	18164751	GO:0006357//regulation of transcription by RNA polymerase II;	GO:0005634//nucleus;	GO:0000981//DNA-binding transcription factor activity, RNA polymerase II-specific;GO:0008270//zinc ion binding;GO:0003677//DNA binding;	-
CCM_05446	3329.33	7420.12	1.15621	0.0471318	0.26517	NW_006271972.1	GO:0016740;GO:0016021	-	sordNOG10547;COG1215	RM	sp|P19449|BCSA1_KOMXY Cellulose synthase catalytic subunit [UDP-forming] OS=Komagataeibacter xylinus GN=bcsA PE=1 SV=1	glycosyl transferase, putative	18167464	-	GO:0016021//integral component of membrane;	GO:0016740//transferase activity;	-
CCM_06701	63.1794	767.236	3.60214	0.0475648	0.265811	NW_006271973.1	GO:0016021;GO:0008152;GO:0016874	K22149	opiNOG02292;sordNOG09270	I	sp|O31826|YNGI_BACSU Putative acyl-CoA synthetase YngI OS=Bacillus subtilis (strain 168) GN=yngI PE=3 SV=1	long-chain-fatty-acid-CoA ligase, putative	18168715	GO:0008152//metabolic process;	GO:0016021//integral component of membrane;	GO:0016874//ligase activity;	-
CCM_05726	470.488	959.779	1.02854	0.0476025	0.265811	NW_006271972.1	GO:0055085;GO:0022891;GO:0016021	K08139	sorNOG01389;sordNOG04337;opiNOG00669	R	sp|P53387|KHT2_KLULC Hexose transporter 2 OS=Kluyveromyces lactis GN=KHT2 PE=3 SV=1	MFS monosaccharide transporter, putative	18167744	GO:0055085//transmembrane transport;	GO:0016021//integral component of membrane;	-	ko04113(Meiosis - yeast)
CCM_04624	302.319	699.002	1.20923	0.0477693	0.265811	NW_006271971.1	GO:0004342;GO:0016787;GO:0005975;GO:0006044	K02564	sordNOG10474;opiNOG01632	G	sp|Q5TNH5|GNPI_ANOGA Glucosamine-6-phosphate isomerase OS=Anopheles gambiae GN=Gnpda1 PE=3 SV=3	glucosamine-6-phosphate deaminase	18166646	GO:0005975//carbohydrate metabolic process;GO:0006044//N-acetylglucosamine metabolic process;	-	GO:0004342//glucosamine-6-phosphate deaminase activity;GO:0016787//hydrolase activity;	ko00520(Amino sugar and nucleotide sugar metabolism)
